# Supplementary material
Source: Research Square preprint supplement (doi:10.21203/rs.3.rs-7966420/v1)
Supplement: Supplementary file 1 [file 42c75b5dcd9d540e1df33e18.docx]

Frequency of Binned Allele Proportions (Variant Sites Only)

| **Bin** | **Sites Counts N2** | **Percentage N2** | **Sites Counts PRDE1** | **Percentage PRDE1** |
| --- | --- | --- | --- | --- |
| (0,0.05] | 1,973,939 | 83.84% | 1,916,135 | 82.44% |
| (0.05,0.1] | 315,084 | 13.38% | 341,823 | 14.71% |
| (0.1,0.15] | 36,057 | 1.53% | 36,664 | 1.58% |
| (0.15,0.2] | 18,170 | 0.77% | 18,842 | 0.81% |
| (0.2,0.25] | 5,099 | 0.22% | 5,012 | 0.22% |
| (0.25,0.3] | 2,451 | 0.10% | 2,460 | 0.11% |
| (0.3,0.35] | 1,004 | 0.04% | 1,010 | 0.04% |
| (0.35,0.4] | 798 | 0.03% | 782 | 0.03% |
| (0.4,0.45] | 270 | 0.01% | 248 | 0.01% |
| (0.45,0.5] | 175 | 0.01% | 195 | 0.01% |
| (0.5,0.55] | 94 | 0.00% | 101 | 0.00% |
| (0.55,0.6] | 153 | 0.01% | 125 | 0.01% |
| (0.6,0.65] | 82 | 0.00% | 90 | 0.00% |
| (0.65,0.7] | 106 | 0.00% | 116 | 0.00% |
| (0.7,0.75] | 113 | 0.00% | 92 | 0.00% |
| (0.75,0.8] | 112 | 0.00% | 106 | 0.00% |
| (0.8,0.85] | 142 | 0.01% | 99 | 0.00% |
| (0.85,0.9] | 144 | 0.01% | 105 | 0.00% |
| (0.9,0.95] | 262 | 0.01% | 240 | 0.01% |
| (0.95,1] | 134 | 0.01% | 138 | 0.01% |
