# Supplementary material
Source: Research Square preprint supplement (doi:10.21203/rs.3.rs-7966420/v1)
Supplement: Supplementary file 1 [file 1635c5f8284300d58bc6c98f.xlsx]

## Sheet: Quantile_1
Chromosome	start	end	Length	strand	Gene_ID	Gene_Name	gene_biotype
V	15817410	15817846	437	-	WBGene00000014	abf-3	protein_coding
V	20557876	20558370	495	-	WBGene00000015	abf-4	protein_coding
V	2274842	2275977	1136	+	WBGene00000027	abu-4	protein_coding
V	10425362	10426353	992	-	WBGene00000144	apc-10	protein_coding
V	6017970	6018886	917	+	WBGene00000159	aps-1	protein_coding
V	19049562	19050752	1191	-	WBGene00000214	asp-1	protein_coding
V	11644477	11645370	894	+	WBGene00000249	bir-1	protein_coding
V	13568850	13570030	1181	+	WBGene00000250	bir-2	protein_coding
V	1444044	1444280	237	-	WBGene00000555	cnc-1	protein_coding
V	1449665	1450183	519	-	WBGene00000556	cnc-2	protein_coding
V	1448004	1448792	789	+	WBGene00000557	cnc-3	protein_coding
V	1447195	1447707	513	+	WBGene00000558	cnc-4	protein_coding
V	1445381	1445832	452	+	WBGene00000559	cnc-5	protein_coding
V	9164292	9165307	1016	-	WBGene00000599	col-10	protein_coding
V	10420788	10421902	1115	-	WBGene00000602	col-13	protein_coding
V	12166706	12167753	1048	-	WBGene00000614	col-37	protein_coding
V	8049703	8050911	1209	-	WBGene00000620	col-43	protein_coding
V	4652863	4653971	1109	-	WBGene00000712	col-139	protein_coding
V	5835855	5836834	980	-	WBGene00000713	col-140	protein_coding
V	6829704	6830739	1036	+	WBGene00000714	col-141	protein_coding
V	6831177	6832256	1080	+	WBGene00000715	col-142	protein_coding
V	6835635	6836704	1070	+	WBGene00000716	col-143	protein_coding
V	9159586	9160642	1057	-	WBGene00000717	col-144	protein_coding
V	9161992	9163005	1014	-	WBGene00000718	col-145	protein_coding
V	9629943	9631012	1070	+	WBGene00000719	col-146	protein_coding
V	10241753	10242790	1038	+	WBGene00000721	col-148	protein_coding
V	10291701	10292869	1169	-	WBGene00000722	col-149	protein_coding
V	10293563	10294649	1087	-	WBGene00000723	col-150	protein_coding
V	11385360	11386529	1170	+	WBGene00000727	col-154	protein_coding
V	11388852	11389876	1025	-	WBGene00000728	col-155	protein_coding
V	11449219	11450357	1139	-	WBGene00000729	col-156	protein_coding
V	11484042	11485039	998	+	WBGene00000730	col-157	protein_coding
V	13200982	13202189	1208	-	WBGene00000733	col-160	protein_coding
V	13317029	13318011	983	-	WBGene00000734	col-161	protein_coding
V	11975551	11976756	1206	+	WBGene00000781	cpr-1	protein_coding
V	16532936	16534100	1165	-	WBGene00000782	cpr-2	protein_coding
V	6614674	6615851	1178	+	WBGene00000784	cpr-4	protein_coding
V	4840617	4841279	663	-	WBGene00000859	cwp-1	protein_coding
V	4841935	4842644	710	-	WBGene00000860	cwp-2	protein_coding
V	4842836	4843845	1010	+	WBGene00000861	cwp-3	protein_coding
V	14356076	14356822	747	+	WBGene00000877	cyn-1	protein_coding
V	15189927	15190926	1000	+	WBGene00000879	cyn-3	protein_coding
V	15186582	15187378	797	-	WBGene00000883	cyn-7	protein_coding
V	11045705	11046833	1129	-	WBGene00000981	dhs-18	protein_coding
V	15381219	15382271	1053	+	WBGene00000986	dhs-23	protein_coding
V	15068678	15069507	830	+	WBGene00001021	dnj-3	protein_coding
V	8461113	8462120	1008	-	WBGene00001040	dnj-22	protein_coding
V	12191519	12192385	867	+	WBGene00001088	dpy-30	protein_coding
V	8022217	8023317	1101	+	WBGene00001152	ech-3	protein_coding
V	14431308	14432359	1052	-	WBGene00001170	egl-1	protein_coding
V	10896658	10897143	486	-	WBGene00001303	sec-61.G	protein_coding
V	12996787	12997522	736	-	WBGene00001387	far-3	protein_coding
V	7225223	7226320	1098	+	WBGene00001428	fkb-3	protein_coding
V	7793367	7794025	659	+	WBGene00001464	flp-21	protein_coding
V	7546468	7547579	1112	-	WBGene00001500	ftn-1	protein_coding
V	10319654	10320151	498	-	WBGene00001646	gna-1	protein_coding
V	8619032	8619870	839	+	WBGene00001694	grd-5	protein_coding
V	8635820	8637007	1188	-	WBGene00001721	grl-12	protein_coding
V	3575055	3575859	805	-	WBGene00001736	grl-27	protein_coding
V	3551346	3551865	520	-	WBGene00001737	grl-28	protein_coding
V	3554611	3555236	626	-	WBGene00001738	grl-29	protein_coding
V	3556286	3556804	519	+	WBGene00001739	grl-30	protein_coding
V	3467451	3468562	1112	-	WBGene00001781	gst-33	protein_coding
V	1921621	1922381	761	+	WBGene00001785	gst-37	protein_coding
V	15915162	15916070	909	-	WBGene00001786	gst-38	protein_coding
V	7398396	7399302	907	-	WBGene00001789	gst-41	protein_coding
V	13497690	13498819	1130	+	WBGene00001808	gut-2	protein_coding
V	4754313	4755453	1141	+	WBGene00001855	hil-4	protein_coding
V	2030507	2031554	1048	-	WBGene00001857	hil-6	protein_coding
V	16042520	16042831	312	+	WBGene00001875	his-1	protein_coding
V	16041873	16042283	411	-	WBGene00001876	his-2	protein_coding
V	16040808	16041191	384	+	WBGene00001877	his-3	protein_coding
V	16040144	16040515	372	-	WBGene00001878	his-4	protein_coding
V	8535214	8535525	312	+	WBGene00001879	his-5	protein_coding
V	8534567	8534977	411	-	WBGene00001880	his-6	protein_coding
V	8533379	8533762	384	+	WBGene00001881	his-7	protein_coding
V	8532715	8533086	372	-	WBGene00001882	his-8	protein_coding
V	8897582	8897992	411	-	WBGene00001891	his-17	protein_coding
V	8898228	8898539	312	+	WBGene00001892	his-18	protein_coding
V	8895765	8896148	384	+	WBGene00001893	his-19	protein_coding
V	8895101	8895472	372	-	WBGene00001894	his-20	protein_coding
V	8891883	8892266	384	-	WBGene00001895	his-21	protein_coding
V	8892559	8892930	372	+	WBGene00001896	his-22	protein_coding
V	8890038	8890448	411	+	WBGene00001901	his-27	protein_coding
V	8889488	8889799	312	-	WBGene00001902	his-28	protein_coding
V	9544659	9545288	630	-	WBGene00001909	his-35	protein_coding
V	9546092	9546841	750	+	WBGene00001910	C50F4.6	protein_coding
V	9547105	9547607	503	+	WBGene00001911	his-37	protein_coding
V	8536513	8536716	204	+	WBGene00001913	his-39	protein_coding
V	9545536	9546264	729	+	WBGene00001915	his-41	protein_coding
V	8847943	8848353	411	+	WBGene00001923	his-49	protein_coding
V	8847393	8847704	312	-	WBGene00001924	his-50	protein_coding
V	8849788	8850171	384	-	WBGene00001925	his-51	protein_coding
V	8850464	8850835	372	+	WBGene00001926	his-52	protein_coding
V	8853670	8854053	384	+	WBGene00001927	his-53	protein_coding
V	8853006	8853377	372	-	WBGene00001928	his-54	protein_coding
V	9087293	9087782	490	-	WBGene00002015	hsp-16.1	protein_coding
V	1804334	1804957	624	-	WBGene00002016	hsp-16.2	protein_coding
V	9090077	9090604	528	+	WBGene00002017	hsp-16.11	protein_coding
V	1805178	1805875	698	+	WBGene00002018	hsp-16.41	protein_coding
V	9088131	9088617	487	+	WBGene00002019	hsp-16.48	protein_coding
V	9089280	9089766	487	-	WBGene00002020	hsp-16.49	protein_coding
V	8384799	8385929	1131	-	WBGene00002021	hsp-17	protein_coding
V	14033949	14034396	448	+	WBGene00002093	ins-10	protein_coding
V	20375536	20376302	767	+	WBGene00002118	ins-35	protein_coding
V	7820578	7821477	900	+	WBGene00002256	lbp-4	protein_coding
V	13879552	13880213	662	+	WBGene00002259	lbp-7	protein_coding
V	13890773	13891364	592	+	WBGene00002260	lbp-8	protein_coding
V	6488203	6489120	918	-	WBGene00002273	lec-10	protein_coding
V	12197437	12198645	1209	-	WBGene00003057	lon-3	protein_coding
V	15570380	15570655	276	+	WBGene00003079	lsm-5	protein_coding
V	10277904	10279056	1153	+	WBGene00003090	lys-1	protein_coding
V	10280307	10281474	1168	-	WBGene00003091	lys-2	protein_coding
V	3481432	3482600	1169	-	WBGene00003096	lys-7	protein_coding
V	7058547	7059624	1078	-	WBGene00003164	mdt-6	protein_coding
V	6691371	6691863	493	-	WBGene00003473	mtl-1	protein_coding
V	14018270	14018673	404	-	WBGene00003474	mtl-2	protein_coding
V	11244839	11245926	1088	+	WBGene00003509	mxl-1	protein_coding
V	11392320	11393508	1189	+	WBGene00003535	nas-16	protein_coding
V	11616376	11616828	453	+	WBGene00003762	nlp-24	protein_coding
V	19613461	19614534	1074	+	WBGene00003764	nlp-26	protein_coding
V	3989378	3989770	393	+	WBGene00003765	nlp-27	protein_coding
V	3987900	3988316	417	+	WBGene00003766	nlp-28	protein_coding
V	3984425	3984847	423	+	WBGene00003767	nlp-29	protein_coding
V	3981980	3982741	762	+	WBGene00003768	nlp-30	protein_coding
V	3980055	3980622	568	+	WBGene00003769	nlp-31	protein_coding
V	11147346	11147737	392	+	WBGene00003771	nlp-33	protein_coding
V	14421566	14422618	1053	-	WBGene00003922	pas-1	protein_coding
V	10770368	10771351	984	+	WBGene00003923	pas-2	protein_coding
V	5583161	5584343	1183	-	WBGene00003927	pas-6	protein_coding
V	8224934	8226116	1183	+	WBGene00003937	pax-1	protein_coding
V	8414086	8415254	1169	+	WBGene00004078	pos-1	protein_coding
V	9174089	9175250	1162	+	WBGene00004107	pqn-16	protein_coding
V	504028	504632	605	+	WBGene00004144	pqn-60	protein_coding
V	12952636	12953208	573	+	WBGene00004151	pqn-68	protein_coding
V	20278654	20279861	1208	-	WBGene00004173	pqn-94	protein_coding
V	609140	609771	632	-	WBGene00004176	pqn-97	protein_coding
V	603610	604205	596	-	WBGene00004177	pqn-98	protein_coding
V	9689686	9690522	837	-	WBGene00004320	rbx-1	protein_coding
V	20479689	20480834	1146	+	WBGene00004413	rpl-2	protein_coding
V	3585312	3586064	753	-	WBGene00004422	rpl-11.1	protein_coding
V	12727593	12728112	520	-	WBGene00004442	rpl-28	protein_coding
V	15512166	15512737	572	+	WBGene00004452	rpl-38	protein_coding
V	7775742	7776079	338	-	WBGene00004453	rpl-39	protein_coding
V	15000018	15000541	524	-	WBGene00004485	rps-16	protein_coding
V	103394	104077	684	-	WBGene00004496	rps-27	protein_coding
V	7776578	7777225	648	+	WBGene00004499	rps-30	protein_coding
V	8301490	8302580	1091	-	WBGene00004766	sel-9	protein_coding
V	19924224	19925033	810	+	WBGene00004810	skr-4	protein_coding
V	17347902	17348723	822	+	WBGene00004811	skr-5	protein_coding
V	18269616	18269985	370	-	WBGene00004812	skr-6	protein_coding
V	4422427	4423011	585	+	WBGene00004813	skr-7	protein_coding
V	4421069	4421575	507	-	WBGene00004820	skr-14	protein_coding
V	6655562	6656501	940	-	WBGene00004897	snb-1	protein_coding
V	13889816	13890327	512	+	WBGene00004997	spp-12	protein_coding
V	10900531	10901303	773	-	WBGene00005001	spp-16	protein_coding
V	6557615	6558203	589	-	WBGene00005005	spp-20	protein_coding
V	13427607	13428760	1154	-	WBGene00005097	srd-19	protein_coding
V	6055589	6056743	1155	+	WBGene00005098	srd-20	protein_coding
V	7632032	7633172	1141	+	WBGene00005103	srd-25	protein_coding
V	15803379	15804512	1134	+	WBGene00005105	srd-27	protein_coding
V	15250604	15251731	1128	+	WBGene00005106	srd-28	protein_coding
V	7635769	7636882	1114	+	WBGene00005107	srd-29	protein_coding
V	11151263	11152433	1171	-	WBGene00005196	srg-39	protein_coding
V	11156941	11158047	1107	-	WBGene00005199	srg-42	protein_coding
V	12307490	12308658	1169	+	WBGene00005202	srg-45	protein_coding
V	13363715	13364728	1014	+	WBGene00005203	srg-46	protein_coding
V	16235171	16235747	577	-	WBGene00005317	srh-98	protein_coding
V	17219253	17220445	1193	-	WBGene00005328	srh-109	protein_coding
V	17484045	17485178	1134	-	WBGene00005330	srh-111	protein_coding
V	17225086	17226219	1134	-	WBGene00005331	srh-112	protein_coding
V	17213043	17214212	1170	+	WBGene00005332	srh-113	protein_coding
V	16715480	16716674	1195	-	WBGene00005354	srh-137	protein_coding
V	16410713	16411843	1131	+	WBGene00005361	srh-145	protein_coding
V	20524700	20525866	1167	-	WBGene00005382	srh-166	protein_coding
V	16953754	16954866	1113	-	WBGene00005416	srh-206	protein_coding
V	18409043	18410242	1200	-	WBGene00005417	srh-207	protein_coding
V	18403722	18404867	1146	-	WBGene00005419	srh-209	protein_coding
V	654727	655923	1197	-	WBGene00005451	srh-245	protein_coding
V	2933143	2934175	1033	-	WBGene00005453	srh-247	protein_coding
V	2954404	2955442	1039	-	WBGene00005454	srh-248	protein_coding
V	17222386	17223405	1020	-	WBGene00005458	srh-252	protein_coding
V	15414147	15415349	1203	+	WBGene00005470	srh-264	protein_coding
V	664797	665923	1127	+	WBGene00005472	srh-266	protein_coding
V	17800838	17801906	1069	+	WBGene00005491	srh-287	protein_coding
V	17794909	17795755	847	-	WBGene00005492	srh-288	protein_coding
V	17802769	17803923	1155	+	WBGene00005496	srh-292	protein_coding
V	15866139	15867333	1195	+	WBGene00005497	srh-293	protein_coding
V	15863342	15864458	1117	+	WBGene00005503	srh-299	protein_coding
V	17007232	17008402	1171	-	WBGene00005581	sri-69	protein_coding
V	651837	653040	1204	-	WBGene00005593	srj-5	protein_coding
V	653303	654502	1200	-	WBGene00005594	srj-6	protein_coding
V	16072765	16073956	1192	-	WBGene00005598	srj-10	protein_coding
V	3241424	3242636	1213	+	WBGene00005599	srj-11	protein_coding
V	10745334	10746543	1210	+	WBGene00005609	srj-21	protein_coding
V	695326	696014	689	-	WBGene00005631	srj-52	protein_coding
V	693541	694725	1185	-	WBGene00005632	srj-53	protein_coding
V	2858660	2859838	1179	-	WBGene00005633	srj-54	protein_coding
V	2854393	2855573	1181	-	WBGene00005635	srj-57	protein_coding
V	9813827	9815007	1181	+	WBGene00005693	sru-30	protein_coding
V	9816690	9817862	1173	+	WBGene00005694	sru-31	protein_coding
V	9805461	9806600	1140	+	WBGene00005700	sru-37	protein_coding
V	9803476	9804634	1159	+	WBGene00005702	sru-39	protein_coding
V	15198255	15199396	1142	+	WBGene00005748	srw-1	protein_coding
V	15268602	15269748	1147	+	WBGene00005769	srw-22	protein_coding
V	15931292	15932490	1199	-	WBGene00005773	srw-26	protein_coding
V	16472513	16473470	958	+	WBGene00005782	srw-35	protein_coding
V	16683186	16684174	989	+	WBGene00005783	srw-36	protein_coding
V	16686025	16687083	1059	+	WBGene00005790	srw-43	protein_coding
V	19400077	19400719	643	-	WBGene00005833	srw-86	protein_coding
V	527902	528869	968	+	WBGene00005855	srw-108	protein_coding
V	3010926	3011494	569	-	WBGene00005882	srw-135	protein_coding
V	6976347	6977387	1041	+	WBGene00005907	srx-16	protein_coding
V	7119063	7120268	1206	-	WBGene00005925	srx-34	protein_coding
V	5156653	5157760	1108	-	WBGene00005930	srx-39	protein_coding
V	3994780	3995938	1159	-	WBGene00005953	srx-62	protein_coding
V	3921935	3922964	1030	+	WBGene00005956	srx-65	protein_coding
V	3068135	3069201	1067	-	WBGene00006105	str-40	protein_coding
V	7411995	7413059	1065	+	WBGene00006106	str-41	protein_coding
V	2145485	2146144	660	-	WBGene00006117	str-52	protein_coding
V	15872573	15873770	1198	+	WBGene00006121	str-56	protein_coding
V	3351566	3352773	1208	+	WBGene00006126	str-63	protein_coding
V	3103128	3104234	1107	-	WBGene00006128	str-66	protein_coding
V	3104790	3105910	1121	-	WBGene00006131	str-69	protein_coding
V	16157335	16158491	1157	-	WBGene00006155	str-99	protein_coding
V	15710787	15711998	1212	-	WBGene00006156	str-101	protein_coding
V	16180650	16181861	1212	+	WBGene00006159	str-106	protein_coding
V	16166236	16167409	1174	+	WBGene00006160	str-108	protein_coding
V	4943116	4944319	1204	-	WBGene00006244	str-211	protein_coding
V	4687103	4687899	797	+	WBGene00006392	taf-10	protein_coding
V	6508907	6509817	911	-	WBGene00006722	ubh-2	protein_coding
V	14156768	14157656	889	+	WBGene00007083	AH10.2	protein_coding
V	14137348	14137866	519	-	WBGene00007085	AH10.4	protein_coding
V	10314671	10315294	624	+	WBGene00007099	trx-2	protein_coding
V	20469894	20470485	592	-	WBGene00007125	B0250.8	protein_coding
V	18318612	18319779	1168	+	WBGene00007182	fbxb-119	protein_coding
V	15089740	15090059	320	+	WBGene00007231	C01G10.4	protein_coding
V	15089076	15089538	463	-	WBGene00007232	C01G10.5	protein_coding
V	15087656	15088431	776	+	WBGene00007233	C01G10.6	protein_coding
V	15085747	15086918	1172	+	WBGene00007234	C01G10.7	protein_coding
V	15105327	15105943	617	-	WBGene00007239	C01G10.14	protein_coding
V	15086913	15087307	395	-	WBGene00007240	C01G10.15	protein_coding
V	11271351	11272467	1117	+	WBGene00007283	clec-222	protein_coding
V	13902795	13903886	1092	+	WBGene00007360	C06B3.1	protein_coding
V	13908130	13908967	838	-	WBGene00007365	C06B3.6	protein_coding
V	15484054	15484637	584	-	WBGene00007369	C06B8.3	protein_coding
V	15997136	15997814	679	+	WBGene00007382	C06C6.8	protein_coding
V	15996171	15996755	585	-	WBGene00007383	C06C6.9	protein_coding
V	11122901	11123867	967	-	WBGene00007385	atp-5	protein_coding
V	11124186	11125056	871	+	WBGene00007390	lmtr-3	protein_coding
V	10105712	10106684	973	+	WBGene00007423	C08B6.2	protein_coding
V	10123624	10124799	1176	+	WBGene00007427	C08B6.6	protein_coding
V	18350129	18350559	431	+	WBGene00007439	C08E8.3	protein_coding
V	18359818	18359988	171	-	WBGene00007441	C08E8.5	protein_coding
V	18368243	18368422	180	-	WBGene00007442	C08E8.6	protein_coding
V	10226828	10227433	606	-	WBGene00007535	ttr-19	protein_coding
V	10239590	10239961	372	-	WBGene00007537	fipr-8	protein_coding
V	10242787	10243205	419	-	WBGene00007538	C12D8.9	protein_coding
V	10228043	10228460	418	-	WBGene00007541	fipr-4	protein_coding
V	10228636	10229322	687	-	WBGene00007542	C12D8.15	protein_coding
V	10229829	10230163	335	+	WBGene00007543	fipr-7	protein_coding
V	10231232	10231594	363	+	WBGene00007544	fipr-6	protein_coding
V	11011589	11012465	877	-	WBGene00007553	C13G3.1	protein_coding
V	18146377	18146618	242	+	WBGene00007567	C14A6.3	protein_coding
V	18167629	18168366	738	-	WBGene00007571	C14A6.7	protein_coding
V	12607413	12608107	695	+	WBGene00007589	erg-28	protein_coding
V	12589633	12590701	1069	-	WBGene00007590	ttr-43	protein_coding
V	12744165	12745050	886	-	WBGene00007609	C15C8.7	protein_coding
V	14393804	14394463	660	+	WBGene00007613	C15H11.1	protein_coding
V	14422725	14423304	580	-	WBGene00007616	rpoa-12	protein_coding
V	14415499	14416182	684	+	WBGene00007619	C15H11.11	protein_coding
V	17532353	17532786	434	-	WBGene00007673	C18D4.3	protein_coding
V	17530813	17531510	698	-	WBGene00007674	C18D4.4	protein_coding
V	15036237	15036869	633	-	WBGene00007714	C25D7.1	protein_coding
V	15066298	15067352	1055	+	WBGene00007718	otub-1	protein_coding
V	15065135	15065317	183	+	WBGene00007719	C25D7.9	protein_coding
V	15067465	15068573	1109	+	WBGene00007720	C25D7.10	protein_coding
V	13297520	13298050	531	+	WBGene00007747	C26E1.1	protein_coding
V	12153157	12154118	962	+	WBGene00007758	C27A7.8	protein_coding
V	12154263	12154654	392	-	WBGene00007759	C27A7.9	protein_coding
V	10812339	10813487	1149	-	WBGene00007797	C29A12.1	protein_coding
V	15346674	15347392	719	-	WBGene00007804	C29F3.3	protein_coding
V	16297370	16298278	909	+	WBGene00007831	srbc-83	protein_coding
V	16300576	16301531	956	+	WBGene00007832	srbc-82	protein_coding
V	18185210	18185461	252	+	WBGene00007852	C31G12.3	protein_coding
V	17584793	17585876	1084	+	WBGene00008012	fbxa-133	protein_coding
V	15207088	15207781	694	-	WBGene00008058	C41G6.12	protein_coding
V	15208422	15209332	911	+	WBGene00008059	C41G6.13	protein_coding
V	19329563	19330757	1195	+	WBGene00008066	fbxb-65	protein_coding
V	19321901	19322487	587	-	WBGene00008067	C43D7.4	protein_coding
V	19320613	19321351	739	+	WBGene00008068	sdz-6	protein_coding
V	19318819	19319510	692	-	WBGene00008069	C43D7.7	protein_coding
V	11041799	11042412	614	+	WBGene00008106	C45B11.5	protein_coding
V	14666028	14667158	1131	+	WBGene00008141	C47E8.1	protein_coding
V	13308916	13309423	508	+	WBGene00008217	C50B6.1	protein_coding
V	13565863	13566932	1070	+	WBGene00008224	slrp-1	protein_coding
V	9536771	9537769	999	+	WBGene00008232	C50F4.4	protein_coding
V	9523167	9524199	1033	-	WBGene00008234	C50F4.9	protein_coding
V	9918710	9919830	1121	+	WBGene00008241	C50H2.5	protein_coding
V	9921337	9922194	858	+	WBGene00008242	ceh-75	protein_coding
V	9905853	9906215	363	-	WBGene00008244	fipr-11	protein_coding
V	9914163	9914529	367	+	WBGene00008245	fipr-10	protein_coding
V	10160436	10161134	699	-	WBGene00008255	C51E3.10	protein_coding
V	14523330	14524129	800	-	WBGene00008262	ril-1	protein_coding
V	14522723	14523205	483	-	WBGene00008263	C53A5.2	protein_coding
V	12414656	12415709	1054	-	WBGene00008296	cdr-2	protein_coding
V	12416358	12417377	1020	-	WBGene00008297	cdr-3	protein_coding
V	12418592	12419428	837	+	WBGene00008298	C54D10.3	protein_coding
V	18808069	18808729	661	-	WBGene00008310	C54E10.6	protein_coding
V	14641101	14641382	282	+	WBGene00008319	C54G10.1	protein_coding
V	15642639	15643292	654	-	WBGene00008322	C55A1.4	protein_coding
V	15648035	15648852	818	+	WBGene00008323	C55A1.6	protein_coding
V	15646983	15647636	654	-	WBGene00008324	C55A1.7	protein_coding
V	15625861	15626223	363	+	WBGene00008326	C55A1.11	protein_coding
V	11503820	11504968	1149	-	WBGene00008330	C55A6.1	protein_coding
V	11515086	11516191	1106	-	WBGene00008334	sdz-8	protein_coding
V	11513711	11514737	1027	-	WBGene00008335	C55A6.6	protein_coding
V	11519334	11520530	1197	-	WBGene00008336	C55A6.7	protein_coding
V	11520515	11521554	1040	+	WBGene00008340	C55A6.11	protein_coding
V	13529545	13530744	1200	-	WBGene00008341	ttr-44	protein_coding
V	10784311	10785367	1057	+	WBGene00008375	D1054.8	protein_coding
V	10791975	10792875	901	-	WBGene00008377	D1054.10	protein_coding
V	10793798	10794924	1127	+	WBGene00008378	ule-3	protein_coding
V	14092792	14093986	1195	+	WBGene00008390	D1086.3	protein_coding
V	11825033	11825762	730	-	WBGene00008408	D2023.4	protein_coding
V	11825894	11827067	1174	-	WBGene00008409	mpst-1	protein_coding
V	14971436	14972419	984	+	WBGene00008522	nlp-59	protein_coding
V	11254013	11255080	1068	-	WBGene00008552	srsx-31	protein_coding
V	17486334	17487241	908	+	WBGene00008575	scl-24	protein_coding
V	14460665	14461057	393	+	WBGene00008590	F08H9.2	protein_coding
V	14463520	14464428	909	-	WBGene00008592	F08H9.4	protein_coding
V	16898457	16899455	999	-	WBGene00008618	fbxa-45	protein_coding
V	16915333	16916179	847	-	WBGene00008620	F09C6.10	protein_coding
V	13853834	13854405	572	-	WBGene00008628	ttr-21	protein_coding
V	16140313	16141171	859	-	WBGene00008631	F10A3.1	protein_coding
V	16142008	16143116	1109	-	WBGene00008632	fbxa-88	protein_coding
V	16162685	16163795	1111	+	WBGene00008636	F10A3.11	protein_coding
V	16194939	16195544	606	+	WBGene00008671	F11A5.3	protein_coding
V	16195679	16196290	612	+	WBGene00008672	F11A5.4	protein_coding
V	16226079	16226681	603	-	WBGene00008679	F11A5.13	protein_coding
V	16217675	16218622	948	-	WBGene00008680	F11A5.15	protein_coding
V	18769767	18770723	957	-	WBGene00008696	clec-255	protein_coding
V	18761378	18761613	236	+	WBGene00008699	F11D11.4	protein_coding
V	18753500	18754428	929	-	WBGene00008700	clec-254	protein_coding
V	18752482	18753136	655	-	WBGene00008701	F11D11.6	protein_coding
V	18747943	18748826	884	-	WBGene00008702	clec-252	protein_coding
V	14288733	14289463	731	-	WBGene00008788	F14D7.1	protein_coding
V	14296799	14297085	287	+	WBGene00008790	F14D7.3	protein_coding
V	14299140	14299669	530	-	WBGene00008792	F14D7.5	protein_coding
V	14306468	14306871	404	-	WBGene00008794	F14D7.7	protein_coding
V	14311879	14312795	917	-	WBGene00008795	F14D7.8	protein_coding
V	14294696	14295550	855	+	WBGene00008796	F14D7.9	protein_coding
V	14308464	14308877	414	+	WBGene00008797	F14D7.10	protein_coding
V	14310346	14311215	870	-	WBGene00008798	F14D7.11	protein_coding
V	16671589	16672298	710	-	WBGene00008816	F14F8.8	protein_coding
V	16667691	16668573	883	-	WBGene00008817	F14F8.9	protein_coding
V	16053899	16055072	1174	-	WBGene00008823	F14H3.4	protein_coding
V	16074117	16075323	1207	-	WBGene00008831	F14H3.12	protein_coding
V	15023844	15024988	1145	+	WBGene00008834	F14H8.4	protein_coding
V	15021032	15022049	1018	+	WBGene00008835	F14H8.5	protein_coding
V	10948230	10949053	824	+	WBGene00008914	F17C11.2	protein_coding
V	10953453	10954434	982	-	WBGene00008916	clec-221	protein_coding
V	10955121	10955768	648	+	WBGene00008917	F17C11.6	protein_coding
V	10937634	10938817	1184	-	WBGene00008922	F17C11.11	protein_coding
V	15533806	15533964	159	-	WBGene00008992	F21A3.2	protein_coding
V	19257583	19257753	171	-	WBGene00009017	F21D9.3	protein_coding
V	19279218	19279988	771	-	WBGene00009021	F21D9.8	protein_coding
V	16233924	16234898	975	+	WBGene00009030	clec-233	protein_coding
V	16230165	16231043	879	+	WBGene00009033	F21H7.12	protein_coding
V	16090985	16092117	1133	+	WBGene00009046	F22B8.3	protein_coding
V	12342314	12343469	1156	-	WBGene00009092	tomm-20	protein_coding
V	12361301	12361744	444	-	WBGene00009096	fipr-1	protein_coding
V	12365348	12365869	522	+	WBGene00009097	fipr-2	protein_coding
V	10545741	10546783	1043	-	WBGene00009110	F25D1.5	protein_coding
V	13468376	13469085	710	+	WBGene00009139	F25H9.7	protein_coding
V	16434734	16435610	877	-	WBGene00009151	F26D2.13	protein_coding
V	16435855	16436736	882	+	WBGene00009152	F26D2.14	protein_coding
V	20562662	20563003	342	+	WBGene00009167	F26F2.2	protein_coding
V	20569295	20569996	702	+	WBGene00009169	F26F2.4	protein_coding
V	20573692	20574152	461	+	WBGene00009170	F26F2.5	protein_coding
V	10747901	10749049	1149	+	WBGene00009236	F28H7.2	protein_coding
V	10749605	10750788	1184	-	WBGene00009237	F28H7.3	protein_coding
V	10746496	10747363	868	-	WBGene00009238	selt-1.2	protein_coding
V	20850877	20851897	1021	-	WBGene00009294	F31D4.9	protein_coding
V	10886837	10887973	1137	+	WBGene00009328	F32D8.3	protein_coding
V	10894800	10895953	1154	+	WBGene00009330	F32D8.5	protein_coding
V	10895556	10896543	988	-	WBGene00009335	F32D8.13	protein_coding
V	10893650	10894788	1139	-	WBGene00009336	F32D8.14	protein_coding
V	10554443	10555339	897	-	WBGene00009339	F32G8.3	protein_coding
V	13359335	13360025	691	+	WBGene00009349	F32H5.3	protein_coding
V	11609096	11610149	1054	-	WBGene00009384	piit-1	protein_coding
V	11601171	11602358	1188	+	WBGene00009388	F35B12.9	protein_coding
V	15912148	15913056	909	+	WBGene00009420	F35E8.6	protein_coding
V	15914014	15915142	1129	+	WBGene00009421	F35E8.7	protein_coding
V	15919434	15920373	940	-	WBGene00009423	F35E8.10	protein_coding
V	13725874	13727013	1140	+	WBGene00009427	fbxa-181	protein_coding
V	15981685	15982854	1170	-	WBGene00009490	fbxa-99	protein_coding
V	15987460	15988174	715	-	WBGene00009491	F36G9.15	protein_coding
V	9715209	9716381	1173	+	WBGene00009581	F40F9.3	protein_coding
V	9734103	9735316	1214	+	WBGene00009585	cal-7	protein_coding
V	14267752	14268716	965	-	WBGene00009599	F40G12.4	protein_coding
V	14282659	14282997	339	+	WBGene00009604	F40G12.9	protein_coding
V	14612548	14613706	1159	+	WBGene00009650	ccnk-1	protein_coding
V	16138760	16139629	870	-	WBGene00009710	F44G3.10	protein_coding
V	12549211	12550385	1175	-	WBGene00009723	F45D3.3	protein_coding
V	12552213	12553191	979	-	WBGene00009724	F45D3.4	protein_coding
V	20596210	20597176	967	-	WBGene00009756	F46B3.1	protein_coding
V	20603314	20604428	1115	+	WBGene00009758	ttr-11	protein_coding
V	20607777	20608788	1012	-	WBGene00009759	ttr-12	protein_coding
V	20618092	20618732	641	-	WBGene00009760	F46B3.7	protein_coding
V	20622650	20623160	511	-	WBGene00009761	F46B3.8	protein_coding
V	20625186	20626143	958	-	WBGene00009762	F46B3.9	protein_coding
V	20632939	20633719	781	-	WBGene00009766	F46B3.15	protein_coding
V	20634630	20635313	684	+	WBGene00009767	F46B3.16	protein_coding
V	9801167	9802065	899	-	WBGene00009775	F46B6.10	protein_coding
V	9774897	9775834	938	-	WBGene00009776	F46B6.12	protein_coding
V	14313690	14314336	647	-	WBGene00009802	F47B8.1	protein_coding
V	14315859	14316625	767	-	WBGene00009803	F47B8.2	protein_coding
V	14323528	14324673	1146	-	WBGene00009805	F47B8.4	protein_coding
V	14329106	14330080	975	+	WBGene00009807	pepm-1	protein_coding
V	14331733	14332667	935	+	WBGene00009809	F47B8.8	protein_coding
V	16870742	16871487	746	-	WBGene00009858	thn-4	protein_coding
V	17014408	17015326	919	+	WBGene00009907	F49H6.3	protein_coding
V	17022370	17022663	294	-	WBGene00009909	F49H6.8	protein_coding
V	17020907	17021461	555	-	WBGene00009913	F49H6.12	protein_coding
V	17008636	17009388	753	-	WBGene00009914	F49H6.13	protein_coding
V	10999663	11000699	1037	-	WBGene00009966	isy-1	protein_coding
V	10999097	10999671	575	+	WBGene00009969	F53B7.7	protein_coding
V	13411077	13411714	638	+	WBGene00009982	F53F1.4	protein_coding
V	13414949	13416064	1116	+	WBGene00009983	cut-2	protein_coding
V	13584784	13585477	694	+	WBGene00009985	F53F4.1	protein_coding
V	13592124	13593183	1060	+	WBGene00009987	tbcb-1	protein_coding
V	13624625	13625567	943	-	WBGene00009992	F53F4.10	protein_coding
V	13611337	13611882	546	-	WBGene00009995	F53F4.13	protein_coding
V	13620976	13621476	501	+	WBGene00009997	F53F4.15	protein_coding
V	20688742	20689531	790	-	WBGene00010000	F53F8.3	protein_coding
V	20690582	20691685	1104	-	WBGene00010001	F53F8.4	protein_coding
V	20394073	20394735	663	+	WBGene00010005	cnc-7	protein_coding
V	15810746	15811377	632	+	WBGene00010016	F54B8.1	protein_coding
V	15812282	15813104	823	+	WBGene00010017	nhr-282	protein_coding
V	15816382	15817150	769	+	WBGene00010019	F54B8.4	protein_coding
V	15820283	15821383	1101	+	WBGene00010020	srbc-48	protein_coding
V	15821698	15822884	1187	+	WBGene00010021	srbc-49	protein_coding
V	15823898	15824966	1069	-	WBGene00010022	srbc-50	protein_coding
V	15826410	15827429	1020	+	WBGene00010023	srbc-51	protein_coding
V	15830586	15831686	1101	-	WBGene00010026	srbc-56	protein_coding
V	11788188	11789115	928	+	WBGene00010081	F55A11.8	protein_coding
V	12263500	12263823	324	-	WBGene00010091	ssp-35	protein_coding
V	12283487	12284126	640	+	WBGene00010098	F55C5.10	protein_coding
V	19287009	19288173	1165	-	WBGene00010100	F55C9.3	protein_coding
V	19288755	19289938	1184	+	WBGene00010101	fbxb-57	protein_coding
V	19297810	19298844	1035	+	WBGene00010104	fbxb-60	protein_coding
V	19301017	19302034	1018	-	WBGene00010105	fbxb-62	protein_coding
V	19304124	19305290	1167	+	WBGene00010106	fbxb-61	protein_coding
V	12637663	12638236	574	+	WBGene00010174	F56H9.2	protein_coding
V	10064521	10064942	422	+	WBGene00010183	fipr-13	protein_coding
V	15766575	15767274	700	+	WBGene00010184	F57A10.2	protein_coding
V	15769438	15770371	934	+	WBGene00010185	F57A10.4	protein_coding
V	13207726	13208897	1172	+	WBGene00010188	F57B1.5	protein_coding
V	16481580	16482059	480	+	WBGene00010202	F57E7.1	protein_coding
V	16482420	16483144	725	-	WBGene00010203	F57E7.2	protein_coding
V	17623530	17624559	1030	+	WBGene00010206	F57G4.1	protein_coding
V	16329149	16330272	1124	+	WBGene00010216	F57G8.7	protein_coding
V	10917592	10918473	882	-	WBGene00010235	F58B4.2	protein_coding
V	10929811	10930774	964	+	WBGene00010236	F58B4.3	protein_coding
V	10930778	10931289	512	-	WBGene00010237	scvp-1	protein_coding
V	9749872	9750408	537	-	WBGene00010253	F58E6.4	protein_coding
V	9753423	9754559	1137	-	WBGene00010254	F58E6.5	protein_coding
V	9751885	9753018	1134	-	WBGene00010255	F58E6.6	protein_coding
V	9756468	9757019	552	+	WBGene00010256	hrg-3	protein_coding
V	9754995	9755825	831	-	WBGene00010257	F58E6.8	protein_coding
V	9756927	9757984	1058	-	WBGene00010258	F58E6.11	protein_coding
V	13992656	13993476	821	+	WBGene00010262	droe-4	protein_coding
V	11929096	11929993	898	+	WBGene00010285	F58H1.2	protein_coding
V	11933978	11935059	1082	+	WBGene00010286	F58H1.3	protein_coding
V	17685141	17686166	1026	+	WBGene00010292	F59A1.6	protein_coding
V	17684108	17684957	850	-	WBGene00010301	F59A1.16	protein_coding
V	14886803	14886907	105	-	WBGene00010377	nspa-1	protein_coding
V	14885897	14886148	252	-	WBGene00010379	H12D21.3	protein_coding
V	14894000	14894854	855	+	WBGene00010381	H12D21.5	protein_coding
V	14897340	14897831	492	-	WBGene00010382	H12D21.6	protein_coding
V	11118766	11119705	940	-	WBGene00010407	scb-1	protein_coding
V	12397845	12398783	939	+	WBGene00010464	K01D12.5	protein_coding
V	12401229	12401483	255	-	WBGene00010466	K01D12.7	protein_coding
V	12402655	12403234	580	+	WBGene00010467	K01D12.8	protein_coding
V	12403956	12404644	689	-	WBGene00010468	K01D12.9	protein_coding
V	12406229	12407169	941	+	WBGene00010469	K01D12.10	protein_coding
V	12409415	12410513	1099	-	WBGene00010473	hrg-2	protein_coding
V	12386454	12386708	255	+	WBGene00010474	K01D12.15	protein_coding
V	14246331	14246861	531	-	WBGene00010512	K02E11.3	protein_coding
V	14247477	14248125	649	-	WBGene00010513	K02E11.4	protein_coding
V	14252325	14253296	972	+	WBGene00010514	K02E11.5	protein_coding
V	14253488	14254321	834	-	WBGene00010516	K02E11.7	protein_coding
V	11394786	11395124	339	-	WBGene00010523	K03B8.4	protein_coding
V	11390273	11390494	222	-	WBGene00010526	K03B8.11	protein_coding
V	16183657	16184772	1116	+	WBGene00010588	srz-14	protein_coding
V	16182410	16183540	1131	+	WBGene00010590	srz-13	protein_coding
V	9480472	9480666	195	-	WBGene00010596	K06A4.6	protein_coding
V	15669170	15670091	922	+	WBGene00010599	K06B4.4	protein_coding
V	9991895	9992792	898	+	WBGene00010699	trpp-6	protein_coding
V	9590617	9591263	647	+	WBGene00010728	K09G1.2	protein_coding
V	12696268	12696862	595	+	WBGene00010737	K10C8.4	protein_coding
V	11200616	11201444	829	+	WBGene00010743	K10D6.3	protein_coding
V	17264066	17264955	890	-	WBGene00010752	K10G4.3	protein_coding
V	15253829	15254805	977	+	WBGene00010797	srbc-75	protein_coding
V	15252382	15253291	910	+	WBGene00010798	srbc-76	protein_coding
V	15260204	15260839	636	+	WBGene00010801	M01B2.8	protein_coding
V	19788440	19789385	946	+	WBGene00010928	clec-258	protein_coding
V	14483160	14484341	1182	+	WBGene00010977	R02D5.3	protein_coding
V	14484218	14484682	465	-	WBGene00010978	R02D5.4	protein_coding
V	14480383	14481501	1119	-	WBGene00010980	R02D5.7	protein_coding
V	10077851	10078344	494	-	WBGene00011001	R04B5.1	protein_coding
V	10090802	10091252	451	-	WBGene00011008	R04B5.11	protein_coding
V	12317278	12318019	742	-	WBGene00011017	R04F11.5	protein_coding
V	14718543	14719591	1049	-	WBGene00011132	R08A2.1	protein_coding
V	14711377	14711700	324	+	WBGene00011134	ssp-33	protein_coding
V	14716499	14717425	927	+	WBGene00011135	fbxa-147	protein_coding
V	13949310	13949671	362	+	WBGene00011187	R10D12.6	protein_coding
V	13950052	13950459	408	+	WBGene00011188	R10D12.7	protein_coding
V	13961245	13961977	733	-	WBGene00011193	algn-13	protein_coding
V	18253794	18254667	874	+	WBGene00011208	R10E8.2	protein_coding
V	12711293	12712099	807	-	WBGene00011244	R11D1.3	protein_coding
V	12728631	12729417	787	+	WBGene00011247	mrpl-49	protein_coding
V	14609943	14610705	763	+	WBGene00011252	R11H6.4	protein_coding
V	11839520	11840303	784	+	WBGene00011266	R13H4.8	protein_coding
V	12903550	12904098	549	-	WBGene00011284	ttr-27	protein_coding
V	12904213	12905174	962	-	WBGene00011285	ttr-28	protein_coding
V	12906128	12906832	705	-	WBGene00011286	ttr-29	protein_coding
V	12966003	12967210	1208	-	WBGene00011306	R186.3	protein_coding
V	12967308	12967982	675	-	WBGene00011309	R186.8	protein_coding
V	14991168	14991649	482	+	WBGene00011319	T01C3.2	protein_coding
V	14991709	14992677	969	-	WBGene00011320	T01C3.3	protein_coding
V	14999535	15000029	495	+	WBGene00011325	T01C3.11	protein_coding
V	15113781	15114092	312	-	WBGene00011341	T01G5.6	protein_coding
V	14167105	14167729	625	-	WBGene00011363	ocam-1	protein_coding
V	20838080	20838768	689	+	WBGene00011391	mrps-12	protein_coding
V	20827715	20828881	1167	-	WBGene00011392	sbt-1	protein_coding
V	20816142	20816553	412	+	WBGene00011394	T03D8.7	protein_coding
V	11058640	11059269	630	-	WBGene00011427	T04C12.1	protein_coding
V	11064954	11065613	660	-	WBGene00011428	nlp-80	protein_coding
V	11054127	11055296	1170	+	WBGene00011429	T04C12.7	protein_coding
V	11757658	11758866	1209	+	WBGene00011437	smoc-1	protein_coding
V	11761893	11763049	1157	-	WBGene00011439	T04F3.4	protein_coding
V	12241426	12241945	520	+	WBGene00011450	ttr-22	protein_coding
V	12251341	12252407	1067	+	WBGene00011451	T04H1.5	protein_coding
V	17070527	17071678	1152	-	WBGene00011485	srbc-14	protein_coding
V	17076874	17077989	1116	-	WBGene00011486	T05E12.3	protein_coding
V	15930182	15931084	903	+	WBGene00011506	srbc-77	protein_coding
V	15885603	15886067	465	-	WBGene00011516	T06C12.9	protein_coding
V	15892996	15894160	1165	+	WBGene00011518	T06C12.11	protein_coding
V	15892061	15892520	460	+	WBGene00011519	T06C12.12	protein_coding
V	15899996	15901054	1059	+	WBGene00011521	T06C12.14	protein_coding
V	9631244	9632256	1013	+	WBGene00011533	T06E4.5	protein_coding
V	9622105	9622934	830	-	WBGene00011535	T06E4.8	protein_coding
V	9620150	9621036	887	+	WBGene00011536	T06E4.9	protein_coding
V	9618231	9619019	789	-	WBGene00011537	T06E4.10	protein_coding
V	10035746	10036413	668	-	WBGene00011544	T06E8.2	protein_coding
V	9951233	9952178	946	+	WBGene00011571	ttr-46	protein_coding
V	9959968	9960476	509	-	WBGene00011574	T07C12.10	protein_coding
V	9943339	9943612	274	+	WBGene00011577	fipr-12	protein_coding
V	12865915	12866445	531	+	WBGene00011591	T07F10.5	protein_coding
V	16445976	16447165	1190	+	WBGene00011618	T08G3.6	protein_coding
V	16478698	16479375	678	-	WBGene00011620	T08G3.11	protein_coding
V	14026334	14027484	1151	-	WBGene00011624	T08G5.3	protein_coding
V	14044374	14045217	844	+	WBGene00011626	T08G5.7	protein_coding
V	13180330	13181534	1205	+	WBGene00011648	cni-1	protein_coding
V	15150961	15151638	678	+	WBGene00011666	T09F5.2	protein_coding
V	15175759	15176324	566	+	WBGene00011668	clec-47	protein_coding
V	16023351	16024193	843	+	WBGene00011687	cwc-15	protein_coding
V	9880167	9881184	1018	+	WBGene00011704	sdz-31	protein_coding
V	11475938	11476906	969	+	WBGene00011710	T11F9.7	protein_coding
V	11480697	11480834	138	-	WBGene00011715	T11F9.14	protein_coding
V	16270300	16271221	922	-	WBGene00011753	T13F3.6	protein_coding
V	11251415	11252529	1115	-	WBGene00011837	srsx-33	protein_coding
V	17217990	17219004	1015	+	WBGene00011840	srbc-62	protein_coding
V	16820631	16821320	690	-	WBGene00011854	T20B3.14	protein_coding
V	10578427	10579141	715	-	WBGene00011892	erh-1	protein_coding
V	10589092	10589860	769	-	WBGene00011894	ttr-23	protein_coding
V	10593936	10594910	975	-	WBGene00011896	T21C9.11	protein_coding
V	15732863	15733668	806	-	WBGene00011942	T23D5.3	protein_coding
V	15747480	15748443	964	-	WBGene00011943	T23D5.8	protein_coding
V	16745109	16746258	1150	-	WBGene00012020	gyg-2	protein_coding
V	16730261	16731464	1204	+	WBGene00012028	srz-99	protein_coding
V	15781386	15782011	626	+	WBGene00012044	T26E4.2	protein_coding
V	15796387	15797534	1148	+	WBGene00012050	nhr-223	protein_coding
V	15797879	15798208	330	-	WBGene00012052	T26E4.10	protein_coding
V	15447528	15448701	1174	-	WBGene00012069	T26H5.4	protein_coding
V	15305813	15306845	1033	-	WBGene00012072	T26H8.4	protein_coding
V	17429701	17430166	466	-	WBGene00012083	T27C5.10	protein_coding
V	11650079	11650762	684	-	WBGene00012101	zip-10	protein_coding
V	11183225	11183643	419	+	WBGene00012152	cnc-10	protein_coding
V	12484885	12486068	1184	+	WBGene00012242	srt-39	protein_coding
V	19738417	19739393	977	+	WBGene00012246	fbxa-131	protein_coding
V	19741951	19742312	362	+	WBGene00012248	W04E12.3	protein_coding
V	12659704	12660330	627	-	WBGene00012276	his-74	protein_coding
V	12658669	12659687	1019	-	WBGene00012277	ccch-3	protein_coding
V	12661266	12661719	454	-	WBGene00012278	W05B10.3	protein_coding
V	14826948	14827052	105	-	WBGene00012294	nspa-8	protein_coding
V	17706114	17706875	762	+	WBGene00012305	W06D12.6	protein_coding
V	16629291	16629648	358	+	WBGene00012309	W06G6.2	protein_coding
V	16645908	16646472	565	-	WBGene00012311	W06G6.9	protein_coding
V	16646700	16647193	494	-	WBGene00012312	W06G6.10	protein_coding
V	16649031	16649300	270	-	WBGene00012313	W06G6.11	protein_coding
V	16651842	16652111	270	+	WBGene00012314	W06G6.12	protein_coding
V	20732087	20733241	1155	+	WBGene00012318	srxa-1	protein_coding
V	13033523	13034221	699	+	WBGene00012335	W07G4.1	protein_coding
V	15709578	15710501	924	-	WBGene00012397	Y6E2A.1	protein_coding
V	17601820	17602970	1151	+	WBGene00012405	ztf-25	protein_coding
V	18776238	18776687	450	-	WBGene00012452	Y17D7B.4	protein_coding
V	18771690	18772639	950	+	WBGene00012454	clec-256	protein_coding
V	16488472	16489104	633	+	WBGene00012516	sqst-4	protein_coding
V	16493453	16494489	1037	-	WBGene00012518	comt-2	protein_coding
V	16486978	16487574	597	-	WBGene00012520	Y32B12A.5	protein_coding
V	16537001	16537805	805	+	WBGene00012521	Y32B12B.1	protein_coding
V	18133300	18134478	1179	-	WBGene00012567	Y37H2A.7	protein_coding
V	18141461	18142577	1117	+	WBGene00012571	Y37H2A.11	protein_coding
V	20497924	20499057	1134	-	WBGene00012615	dct-16	protein_coding
V	20499780	20500505	726	-	WBGene00012616	dct-14	protein_coding
V	20504900	20505097	198	-	WBGene00012617	Y38H6C.4	protein_coding
V	20546608	20547148	541	-	WBGene00012630	Y38H6C.18	protein_coding
V	20552294	20553071	778	-	WBGene00012631	vmo-1	protein_coding
V	20554116	20555267	1152	-	WBGene00012633	Y38H6C.21	protein_coding
V	20555690	20556360	671	-	WBGene00012634	Y38H6C.23	protein_coding
V	19189245	19190013	769	-	WBGene00012666	Y39B6A.3	protein_coding
V	19118505	19119425	921	-	WBGene00012675	Y39B6A.13	protein_coding
V	19001018	19001856	839	+	WBGene00012693	Y39B6A.34	protein_coding
V	11095446	11095973	528	-	WBGene00012778	Y42A5A.3	protein_coding
V	19370489	19371384	896	+	WBGene00012808	Y43F8A.1	protein_coding
V	19494762	19495687	926	-	WBGene00012816	scl-21	protein_coding
V	19490761	19491231	471	+	WBGene00012818	Y43F8B.7	protein_coding
V	19468383	19469554	1172	+	WBGene00012822	Y43F8B.12	protein_coding
V	19670259	19671402	1144	+	WBGene00012833	Y43F8C.11	protein_coding
V	19709775	19710614	840	-	WBGene00012836	Y43F8C.15	protein_coding
V	20635901	20636955	1055	-	WBGene00012849	ttr-13	protein_coding
V	14726896	14727493	598	+	WBGene00013046	Y50E8A.1	protein_coding
V	14728441	14728854	414	-	WBGene00013047	Y50E8A.2	protein_coding
V	14779996	14781114	1119	+	WBGene00013053	Y50E8A.10	protein_coding
V	14781430	14782282	853	+	WBGene00013054	Y50E8A.11	protein_coding
V	18290942	18291348	407	+	WBGene00013060	Y51A2A.4	protein_coding
V	18302714	18303506	793	+	WBGene00013062	Y51A2A.6	protein_coding
V	18305181	18305571	391	-	WBGene00013063	clec-249	protein_coding
V	18294359	18294749	391	+	WBGene00013064	clec-248	protein_coding
V	18379119	18379289	171	+	WBGene00013071	Y51A2B.8	protein_coding
V	18582658	18582967	310	+	WBGene00013081	txt-14	protein_coding
V	18085709	18086224	516	-	WBGene00013349	Y59A8B.12	protein_coding
V	18007230	18007871	642	+	WBGene00013351	Y59A8B.19	protein_coding
V	17951949	17952149	201	+	WBGene00013356	Y59A8B.24	protein_coding
V	19921630	19922713	1084	-	WBGene00013364	Y60A3A.16	protein_coding
V	17241582	17242652	1071	-	WBGene00013472	Y68A4B.3	protein_coding
V	18638484	18639591	1108	+	WBGene00013489	col-42	protein_coding
V	16662114	16662960	847	-	WBGene00013491	Y70C5B.1	protein_coding
V	15109560	15110443	884	+	WBGene00013566	Y75B12A.2	protein_coding
V	15184699	15185880	1182	+	WBGene00013567	Y75B12B.1	protein_coding
V	15185891	15186279	389	-	WBGene00013568	Y75B12B.3	protein_coding
V	15201474	15202384	911	-	WBGene00013570	Y75B12B.8	protein_coding
V	15200068	15201221	1154	+	WBGene00013572	Y75B12B.10	protein_coding
V	15191296	15191855	560	+	WBGene00013573	Y75B12B.11	protein_coding
V	16918731	16919786	1056	+	WBGene00013611	Y102A5C.2	protein_coding
V	16939031	16940049	1019	+	WBGene00013616	fbxa-148	protein_coding
V	16947158	16948111	954	-	WBGene00013619	fbxa-112	protein_coding
V	16980668	16981880	1213	+	WBGene00013626	srz-54	protein_coding
V	16988240	16988714	475	-	WBGene00013628	Y102A5C.27	protein_coding
V	20094253	20095008	756	-	WBGene00013752	nlp-69	protein_coding
V	20203385	20204547	1163	+	WBGene00013757	fbxa-113	protein_coding
V	19729031	19729637	607	+	WBGene00013817	Y116F11A.3	protein_coding
V	19899467	19900291	825	+	WBGene00013829	Y116F11B.14	protein_coding
V	12609826	12610857	1032	+	WBGene00013853	ZC116.1	protein_coding
V	12611682	12612218	537	-	WBGene00013854	cyc-2.2	protein_coding
V	14878348	14878452	105	+	WBGene00013887	nspa-5	protein_coding
V	14880435	14880539	105	-	WBGene00013888	nspa-3	protein_coding
V	14879529	14879780	252	-	WBGene00013889	ZC412.8	protein_coding
V	14881317	14882109	793	-	WBGene00013890	ZC412.9	protein_coding
V	12810212	12811192	981	-	WBGene00013897	ZC443.2	protein_coding
V	12803574	12804550	977	+	WBGene00013910	srbc-45	protein_coding
V	17092562	17093546	985	+	WBGene00013935	ZK218.1	protein_coding
V	17097800	17098769	970	-	WBGene00013937	ZK218.3	protein_coding
V	17101129	17102109	981	+	WBGene00013939	ZK218.5	protein_coding
V	17105783	17106656	874	+	WBGene00013941	ZK218.7	protein_coding
V	17107388	17108410	1023	-	WBGene00013943	ZK218.11	protein_coding
V	18423775	18424571	797	-	WBGene00013951	ZK262.4	protein_coding
V	16046873	16047604	732	+	WBGene00013961	ZK285.2	protein_coding
V	9678277	9679302	1026	+	WBGene00013964	nlp-73	protein_coding
V	9691039	9692159	1121	-	WBGene00013966	ztf-9	protein_coding
V	9679357	9680250	894	+	WBGene00013968	ZK287.9	protein_coding
V	18731991	18732772	782	+	WBGene00013971	scl-19	protein_coding
V	10202098	10202610	513	+	WBGene00014108	ZK856.7	protein_coding
V	10202538	10203485	948	-	WBGene00014109	chpf-1	protein_coding
V	10205680	10206602	923	-	WBGene00014111	rpc-25	protein_coding
V	10203771	10204938	1168	-	WBGene00014112	ZK856.11	protein_coding
V	12186326	12187516	1191	-	WBGene00014125	ZK863.8	protein_coding
V	3978825	3979134	310	-	WBGene00015046	nlp-34	protein_coding
V	9134255	9135422	1168	+	WBGene00015053	B0222.1	protein_coding
V	48922	49619	698	+	WBGene00015151	B0348.1	protein_coding
V	8754970	8755759	790	+	WBGene00015221	B0507.4	protein_coding
V	8753695	8754873	1179	+	WBGene00015222	B0507.5	protein_coding
V	8764953	8766038	1086	-	WBGene00015226	B0507.9	protein_coding
V	438394	438730	337	+	WBGene00015254	B0554.1	protein_coding
V	8821866	8822558	693	-	WBGene00015277	C01B7.7	protein_coding
V	4919207	4919591	385	+	WBGene00015339	C02E7.6	protein_coding
V	4918136	4918574	439	-	WBGene00015340	C02E7.7	protein_coding
V	4920342	4920790	449	-	WBGene00015341	C02E7.8	protein_coding
V	4932393	4933045	653	-	WBGene00015342	C02E7.10	protein_coding
V	7365251	7366060	810	+	WBGene00015393	exc-13	protein_coding
V	7354435	7355564	1130	-	WBGene00015398	tag-293	protein_coding
V	5912726	5913802	1077	+	WBGene00015427	C04E6.13	protein_coding
V	742120	743273	1154	+	WBGene00015489	C05E4.7	protein_coding
V	761229	761982	754	-	WBGene00015491	C05E4.12	protein_coding
V	3523587	3524679	1093	+	WBGene00015574	irg-1	protein_coding
V	3502307	3503151	845	+	WBGene00015578	C07G3.10	protein_coding
V	8084075	8085241	1167	-	WBGene00015661	C09H5.7	protein_coding
V	5314404	5315589	1186	+	WBGene00015681	C10G8.2	protein_coding
V	5311935	5312349	415	+	WBGene00015683	C10G8.4	protein_coding
V	7676204	7676965	762	+	WBGene00015706	C12D5.3	protein_coding
V	7672558	7673253	696	+	WBGene00015707	C12D5.4	protein_coding
V	7668240	7669006	767	+	WBGene00015708	C12D5.5	protein_coding
V	7279390	7280532	1143	+	WBGene00015721	C13A2.4	protein_coding
V	2421867	2422895	1029	+	WBGene00015731	C13B7.6	protein_coding
V	4979947	4980973	1027	-	WBGene00015737	srsx-12	protein_coding
V	7224078	7225204	1127	+	WBGene00015741	C13F10.1	protein_coding
V	7221469	7222156	688	+	WBGene00015742	kxd-1	protein_coding
V	7222054	7223252	1199	-	WBGene00015746	C13F10.7	protein_coding
V	536628	537418	791	+	WBGene00015759	C14C6.5	protein_coding
V	5665242	5666086	845	-	WBGene00015769	C14C11.7	protein_coding
V	8238854	8240028	1175	-	WBGene00015858	C16D9.3	protein_coding
V	8264241	8264736	496	+	WBGene00015864	C16D9.9	protein_coding
V	3342804	3343865	1062	+	WBGene00015877	C17B7.3	protein_coding
V	3339309	3340089	781	+	WBGene00015878	C17B7.4	protein_coding
V	3345312	3346484	1173	-	WBGene00015885	fbxa-65	protein_coding
V	3353225	3354086	862	+	WBGene00015886	C17B7.12	protein_coding
V	3890964	3892019	1056	-	WBGene00015905	C17E7.12	protein_coding
V	7491875	7493024	1150	-	WBGene00015959	srbc-10	protein_coding
V	2719696	2720863	1168	-	WBGene00016051	srt-27	protein_coding
V	2730622	2731098	477	-	WBGene00016052	dod-3	protein_coding
V	9053262	9054069	808	-	WBGene00016097	C25E10.8	protein_coding
V	9055326	9056353	1028	-	WBGene00016099	C25E10.10	protein_coding
V	9057549	9058727	1179	-	WBGene00016100	C25E10.11	protein_coding
V	7760474	7761633	1160	+	WBGene00016150	hint-3	protein_coding
V	7007607	7008299	693	+	WBGene00016361	drd-10	protein_coding
V	7006264	7006818	555	+	WBGene00016362	C33G8.4	protein_coding
V	3166560	3167268	709	+	WBGene00016473	C36C5.4	protein_coding
V	3157086	3157871	786	+	WBGene00016474	C36C5.5	protein_coding
V	3158404	3159352	949	-	WBGene00016481	C36C5.12	protein_coding
V	3164675	3165538	864	-	WBGene00016483	C36C5.14	protein_coding
V	3167968	3168750	783	-	WBGene00016484	C36C5.15	protein_coding
V	7862338	7863070	733	-	WBGene00016502	C37C3.10	protein_coding
V	7838588	7839585	998	-	WBGene00016504	C37C3.12	protein_coding
V	7837093	7837909	817	-	WBGene00016505	ttr-33	protein_coding
V	2182038	2183191	1154	+	WBGene00016685	srbc-16	protein_coding
V	2155532	2156635	1104	+	WBGene00016689	srbc-21	protein_coding
V	2157130	2158274	1145	+	WBGene00016690	srbc-22	protein_coding
V	2150091	2150976	886	-	WBGene00016694	C45H4.13	protein_coding
V	2158659	2159431	773	-	WBGene00016695	C45H4.14	protein_coding
V	4046422	4047433	1012	+	WBGene00016781	phat-7	protein_coding
V	4043932	4044951	1020	+	WBGene00016782	phat-3	protein_coding
V	4054074	4055125	1052	-	WBGene00016789	djr-1.2	protein_coding
V	7600609	7601543	935	-	WBGene00016821	scl-26	protein_coding
V	7529116	7529450	335	+	WBGene00016923	C54F6.5	protein_coding
V	7523692	7524164	473	+	WBGene00016924	C54F6.6	protein_coding
V	5593706	5594503	798	+	WBGene00016989	mrpl-48	protein_coding
V	5592700	5593612	913	+	WBGene00016990	vps-37	protein_coding
V	5595653	5596551	899	-	WBGene00016992	zhit-1	protein_coding
V	9354521	9355471	951	-	WBGene00017091	ttr-40	protein_coding
V	9379435	9379908	474	-	WBGene00017096	E02C12.11	protein_coding
V	3138703	3139171	469	+	WBGene00017172	F02C9.1	protein_coding
V	3137427	3138588	1162	-	WBGene00017175	irld-3	protein_coding
V	8835611	8836710	1100	+	WBGene00017188	F07B7.7	protein_coding
V	8846203	8846835	633	-	WBGene00017189	F07B7.8	protein_coding
V	8863960	8864652	693	-	WBGene00017191	F07B7.13	protein_coding
V	8866653	8867297	645	-	WBGene00017192	F07B7.14	protein_coding
V	9254219	9254646	428	-	WBGene00017197	F07C3.9	protein_coding
V	7638101	7638657	557	+	WBGene00017199	clec-45	protein_coding
V	7626850	7627783	934	+	WBGene00017200	F07C4.6	protein_coding
V	7638894	7639887	994	-	WBGene00017203	F07C4.10	protein_coding
V	7642519	7643516	998	-	WBGene00017204	F07C4.11	protein_coding
V	7304806	7305795	990	+	WBGene00017229	F07G11.2	protein_coding
V	7332553	7333424	872	+	WBGene00017362	F10G2.1	protein_coding
V	7331168	7331777	610	+	WBGene00017363	F10G2.2	protein_coding
V	7327228	7327755	528	+	WBGene00017365	F10G2.4	protein_coding
V	4381620	4382398	779	-	WBGene00017410	F13A2.1	protein_coding
V	4401199	4401965	767	-	WBGene00017414	F13A2.5	protein_coding
V	5144841	5145865	1025	+	WBGene00017465	F14F9.2	protein_coding
V	5146125	5146494	370	-	WBGene00017469	F14F9.6	protein_coding
V	2329444	2329954	511	-	WBGene00017490	pud-2.1	protein_coding
V	2326678	2327282	605	+	WBGene00017498	pud-4	protein_coding
V	2330429	2330930	502	+	WBGene00017499	pud-1.1	protein_coding
V	2323014	2323524	511	+	WBGene00017500	pud-2.2	protein_coding
V	2324634	2325152	519	-	WBGene00017501	pud-3	protein_coding
V	1315119	1315454	336	+	WBGene00017502	F16B3.2	protein_coding
V	1594019	1594673	655	+	WBGene00017506	F16B4.4	protein_coding
V	1587206	1588161	956	+	WBGene00017508	F16B4.6	protein_coding
V	1585711	1586089	379	+	WBGene00017509	F16B4.7	protein_coding
V	7423573	7424436	864	-	WBGene00017566	F18E3.10	protein_coding
V	7413482	7413754	273	+	WBGene00017567	F18E3.11	protein_coding
V	7563247	7564396	1150	+	WBGene00017598	F19F10.1	protein_coding
V	7552121	7552708	588	+	WBGene00017599	F19F10.3	protein_coding
V	7552756	7553923	1168	-	WBGene00017600	ttr-10	protein_coding
V	7051715	7052179	465	+	WBGene00017613	F20A1.1	protein_coding
V	7047059	7047612	554	-	WBGene00017619	F20A1.8	protein_coding
V	7052717	7053200	484	-	WBGene00017621	txt-17	protein_coding
V	8177093	8177449	357	-	WBGene00017638	F20D6.9	protein_coding
V	9132343	9133307	965	+	WBGene00017652	F21C10.1	protein_coding
V	9126616	9127708	1093	+	WBGene00017654	F21C10.4	protein_coding
V	9125645	9126006	362	+	WBGene00017655	F21C10.5	protein_coding
V	9124480	9125292	813	+	WBGene00017656	F21C10.6	protein_coding
V	9096267	9097220	954	+	WBGene00017659	F21C10.10	protein_coding
V	9123486	9123852	367	+	WBGene00017660	F21C10.11	protein_coding
V	8265202	8266332	1131	-	WBGene00017679	F21F8.5	protein_coding
V	5684873	5685733	861	+	WBGene00017767	F25B4.4	protein_coding
V	5700154	5701080	927	+	WBGene00017772	clec-1	protein_coding
V	7435930	7436958	1029	+	WBGene00017789	F25E5.8	protein_coding
V	7437506	7437919	414	-	WBGene00017790	F25E5.9	protein_coding
V	8564303	8565175	873	-	WBGene00017799	F25G6.8	protein_coding
V	7981545	7982674	1130	+	WBGene00017818	F26D11.1	protein_coding
V	7955404	7956497	1094	-	WBGene00017823	pals-34	protein_coding
V	5837565	5838613	1049	-	WBGene00017833	F26F12.2	protein_coding
V	8640596	8641366	771	-	WBGene00017880	F28A12.3	protein_coding
V	4346089	4346425	337	-	WBGene00017982	hpo-18	protein_coding
V	4373754	4374874	1121	-	WBGene00017985	neg-1	protein_coding
V	4374974	4376173	1200	-	WBGene00017986	F32D1.7	protein_coding
V	4376619	4377722	1104	-	WBGene00017987	F32D1.8	protein_coding
V	3284929	3285902	974	+	WBGene00018055	F35F10.5	protein_coding
V	3286340	3287430	1091	-	WBGene00018057	F35F10.7	protein_coding
V	3318170	3319075	906	-	WBGene00018062	F35F10.13	protein_coding
V	3319466	3320105	640	-	WBGene00018063	F35F10.14	protein_coding
V	9426852	9427175	324	-	WBGene00018091	F36D4.6	protein_coding
V	2096072	2097272	1201	+	WBGene00018096	clec-207	protein_coding
V	2097953	2099158	1206	+	WBGene00018097	clec-208	protein_coding
V	2099340	2100075	736	+	WBGene00018098	F36F12.7	protein_coding
V	2090669	2091740	1072	+	WBGene00018099	ztf-28	protein_coding
V	1778323	1779236	914	-	WBGene00018112	F36H9.4	protein_coding
V	1773788	1774924	1137	-	WBGene00018115	F36H9.7	protein_coding
V	8358203	8359163	961	-	WBGene00018181	mpdu-1	protein_coding
V	7877444	7878514	1071	+	WBGene00018218	F40A3.3	protein_coding
V	7875756	7876790	1035	+	WBGene00018219	F40A3.4	protein_coding
V	3570995	3571610	616	+	WBGene00018229	F40C5.2	protein_coding
V	8622614	8623563	950	+	WBGene00018284	F41E6.1	protein_coding
V	8600440	8601520	1081	-	WBGene00018289	F41E6.8	protein_coding
V	8605088	8606128	1041	-	WBGene00018290	vps-60	protein_coding
V	8610917	8611268	352	-	WBGene00018291	fip-4	protein_coding
V	4654555	4655121	567	+	WBGene00018296	F41F3.1	protein_coding
V	4647769	4648239	471	-	WBGene00018297	F41F3.3	protein_coding
V	5771945	5772512	568	+	WBGene00018425	F44E7.3	protein_coding
V	5791230	5792229	1000	+	WBGene00018431	F44E7.9	protein_coding
V	8512690	8513461	772	-	WBGene00018481	F45F2.9	protein_coding
V	6520435	6521021	587	+	WBGene00018489	F46E10.2	protein_coding
V	6518297	6519042	746	+	WBGene00018490	F46E10.3	protein_coding
V	6532071	6533060	990	-	WBGene00018492	hpo-26	protein_coding
V	636581	637518	938	+	WBGene00018614	pals-31	protein_coding
V	622170	622935	766	-	WBGene00018616	F48G7.5	protein_coding
V	625674	626421	748	-	WBGene00018618	F48G7.7	protein_coding
V	627022	627685	664	-	WBGene00018619	F48G7.8	protein_coding
V	628038	628627	590	-	WBGene00018620	F48G7.9	protein_coding
V	633901	634955	1055	-	WBGene00018621	F48G7.10	protein_coding
V	2602153	2603063	911	-	WBGene00018762	F53E10.6	protein_coding
V	2796298	2797066	769	+	WBGene00018824	F54E2.2	protein_coding
V	6389039	6389734	696	-	WBGene00019016	F57F4.2	protein_coding
V	8104773	8105612	840	+	WBGene00019065	F58G4.3	protein_coding
V	8099606	8100513	908	+	WBGene00019066	sdz-23	protein_coding
V	2015836	2016528	693	-	WBGene00019090	F59A7.2	protein_coding
V	3812591	3813437	847	+	WBGene00019178	scl-12	protein_coding
V	3810785	3811641	857	-	WBGene00019179	scl-13	protein_coding
V	8923088	8923896	809	+	WBGene00019203	ttr-47	protein_coding
V	4911712	4912381	670	-	WBGene00019236	H23N18.5	protein_coding
V	1533892	1534415	524	-	WBGene00019349	trx-5	protein_coding
V	4675602	4676192	591	-	WBGene00019356	K03B4.6	protein_coding
V	4691605	4692432	828	-	WBGene00019357	cpg-8	protein_coding
V	1667204	1667837	634	+	WBGene00019387	K04F1.8	protein_coding
V	1665221	1665950	730	+	WBGene00019388	K04F1.9	protein_coding
V	8888298	8888930	633	-	WBGene00019442	K06C4.1	protein_coding
V	8207235	8207997	763	+	WBGene00019476	timp-1	protein_coding
V	8201808	8202523	716	+	WBGene00019478	cri-2	protein_coding
V	8226032	8226912	881	-	WBGene00019482	K07C11.10	protein_coding
V	852484	853241	758	+	WBGene00019557	K09C6.3	protein_coding
V	847821	848858	1038	+	WBGene00019559	srbc-13	protein_coding
V	4025047	4026212	1166	+	WBGene00019564	K09D9.1	protein_coding
V	4019488	4020601	1114	+	WBGene00019566	K09D9.3	protein_coding
V	5752352	5753532	1181	-	WBGene00019604	pgph-1	protein_coding
V	5034521	5035158	638	-	WBGene00019646	K11D12.6	protein_coding
V	5035286	5036464	1179	-	WBGene00019647	K11D12.7	protein_coding
V	6279031	6280146	1116	+	WBGene00019668	fil-2	protein_coding
V	6280293	6281275	983	-	WBGene00019669	K12B6.4	protein_coding
V	449981	450437	457	+	WBGene00019744	M02H5.8	protein_coding
V	467567	468560	994	-	WBGene00019745	srbc-57	protein_coding
V	5617601	5618338	738	+	WBGene00019754	M03E7.2	protein_coding
V	5615024	5616200	1177	+	WBGene00019755	M03E7.3	protein_coding
V	5953826	5954847	1022	-	WBGene00019765	M03F8.6	protein_coding
V	6041196	6041475	280	-	WBGene00019804	R01B10.2	protein_coding
V	6044583	6045129	547	-	WBGene00019805	R01B10.3	protein_coding
V	505491	506068	578	+	WBGene00020014	R11G11.6	protein_coding
V	812809	813201	393	-	WBGene00020063	R13D11.10	protein_coding
V	502142	503223	1082	-	WBGene00020154	T01G6.10	protein_coding
V	4129904	4130909	1006	+	WBGene00020237	phat-4	protein_coding
V	4115089	4116171	1083	-	WBGene00020239	T05B4.8	protein_coding
V	4117585	4118432	848	-	WBGene00020240	T05B4.9	protein_coding
V	4119890	4120729	840	-	WBGene00020241	T05B4.10	protein_coding
V	4121489	4122515	1027	-	WBGene00020242	phat-5	protein_coding
V	6438901	6440103	1203	+	WBGene00020267	T05H4.4	protein_coding
V	6426246	6427112	867	-	WBGene00020275	atp-4	protein_coding
V	6839289	6840256	968	+	WBGene00020517	hpo-8	protein_coding
V	4890429	4891422	994	+	WBGene00020588	T19H12.2	protein_coding
V	4885672	4886809	1138	+	WBGene00020589	T19H12.3	protein_coding
V	3408902	3409528	627	+	WBGene00020613	T20D4.7	protein_coding
V	3400252	3401063	812	+	WBGene00020616	T20D4.10	protein_coding
V	3398690	3399640	951	+	WBGene00020617	T20D4.11	protein_coding
V	3397065	3397922	858	+	WBGene00020618	T20D4.12	protein_coding
V	3430510	3431635	1126	-	WBGene00020624	T20D4.19	protein_coding
V	8469040	8470072	1033	+	WBGene00020716	phf-30	protein_coding
V	3559044	3559691	648	+	WBGene00020744	T24A6.1	protein_coding
V	3545677	3546617	941	-	WBGene00020752	srbc-68	protein_coding
V	3564240	3564435	196	-	WBGene00020754	T24A6.17	protein_coding
V	3557137	3557778	642	-	WBGene00020755	grl-31	protein_coding
V	6768502	6768786	285	+	WBGene00020805	T25F10.1	protein_coding
V	9067978	9068390	413	+	WBGene00020862	fip-2	protein_coding
V	3280379	3281167	789	+	WBGene00020869	T28A11.2	protein_coding
V	3275333	3276110	778	+	WBGene00020870	T28A11.3	protein_coding
V	3274050	3274487	438	+	WBGene00020871	T28A11.4	protein_coding
V	3249604	3250253	650	-	WBGene00020875	T28A11.13	protein_coding
V	3258374	3259218	845	-	WBGene00020878	T28A11.16	protein_coding
V	3268688	3269514	827	-	WBGene00020881	T28A11.19	protein_coding
V	3276956	3278151	1196	-	WBGene00020883	fbxa-64	protein_coding
V	6504540	6505389	850	-	WBGene00020912	W01A11.7	protein_coding
V	8296558	8297604	1047	-	WBGene00020940	W02D7.4	protein_coding
V	6709578	6710679	1102	-	WBGene00020951	sna-1	protein_coding
V	2672986	2674167	1182	+	WBGene00020953	W02G9.3	protein_coding
V	127000	128034	1035	-	WBGene00021000	W03F9.2	protein_coding
V	8824559	8825203	645	-	WBGene00021108	W09B7.3	protein_coding
V	2271113	2271850	738	-	WBGene00021162	Y5H2A.1	protein_coding
V	2188295	2188843	549	+	WBGene00021165	Y5H2B.3	protein_coding
V	2406107	2407314	1208	-	WBGene00021228	str-265	protein_coding
V	2322038	2322566	529	-	WBGene00021236	pud-1.2	protein_coding
V	1907650	1908568	919	+	WBGene00021303	Y32G9A.5	protein_coding
V	6096197	6097093	897	+	WBGene00021392	Y38A10A.7	protein_coding
V	63726	64503	778	-	WBGene00021414	Y38C9B.3	protein_coding
V	3767204	3767808	605	+	WBGene00021478	Y39H10A.1	protein_coding
V	2068449	2069142	694	+	WBGene00021486	lbp-9	protein_coding
V	2049217	2050185	969	-	WBGene00021491	comt-4	protein_coding
V	4160386	4160889	504	+	WBGene00021557	Y45G5AM.5	protein_coding
V	1642499	1643121	623	+	WBGene00021608	Y46H3D.1	protein_coding
V	1630309	1631248	940	-	WBGene00021612	Y46H3D.8	protein_coding
V	4420272	4420759	488	+	WBGene00021616	Y47D7A.2	protein_coding
V	4417734	4418216	483	-	WBGene00021619	Y47D7A.6	protein_coding
V	4419393	4419867	475	-	WBGene00021620	Y47D7A.7	protein_coding
V	4423535	4423960	426	-	WBGene00021621	Y47D7A.9	protein_coding
V	4427769	4428302	534	-	WBGene00021623	Y47D7A.11	protein_coding
V	4428950	4429676	727	-	WBGene00021624	Y47D7A.12	protein_coding
V	4434992	4435927	936	-	WBGene00021625	Y47D7A.13	protein_coding
V	702560	703745	1186	+	WBGene00021708	srbc-37	protein_coding
V	5286343	5287373	1031	-	WBGene00021731	Y49G5A.1	protein_coding
V	1196072	1197141	1070	+	WBGene00021736	wrb-1	protein_coding
V	1207307	1207834	528	+	WBGene00021739	Y50D4A.5	protein_coding
V	9439160	9439549	390	-	WBGene00021821	Y54B9A.1	protein_coding
V	7058095	7058544	450	+	WBGene00021957	Y57E12AL.2	protein_coding
V	7054898	7055323	426	+	WBGene00021958	Y57E12AL.4	protein_coding
V	7059663	7060470	808	-	WBGene00021959	Y57E12AL.6	protein_coding
V	7063174	7063718	545	+	WBGene00021960	tmem-258	protein_coding
V	6948525	6948874	350	+	WBGene00021961	Y57E12B.1	protein_coding
V	5071695	5072182	488	-	WBGene00021976	Y58A7A.2	protein_coding
V	4783613	4784535	923	+	WBGene00022013	Y60C6A.1	protein_coding
V	4560741	4561823	1083	+	WBGene00022016	Y61A9LA.4	protein_coding
V	4573133	4573924	792	-	WBGene00022020	hpo-39	protein_coding
V	7982657	7983431	775	-	WBGene00022394	natb-1	protein_coding
V	7993717	7994670	954	-	WBGene00022395	ceh-76	protein_coding
V	8011213	8012345	1133	-	WBGene00022400	rpb-9	protein_coding
V	8010491	8011106	616	-	WBGene00022402	lmtr-2	protein_coding
V	7925783	7926920	1138	+	WBGene00022406	srsx-7	protein_coding
V	7936144	7937252	1109	-	WBGene00022408	srsx-3	protein_coding
V	8686069	8686864	796	-	WBGene00022541	ZC190.7	protein_coding
V	8686952	8687807	856	-	WBGene00022542	ZC190.8	protein_coding
V	8721198	8722260	1063	-	WBGene00022551	ZC196.8	protein_coding
V	7713991	7714698	708	+	WBGene00022653	ZK105.1	protein_coding
V	1752796	1753856	1061	+	WBGene00022804	ZK697.1	protein_coding
V	1748432	1749153	722	-	WBGene00022808	ZK697.8	protein_coding
V	2255533	2256655	1123	+	WBGene00023284	F41B5.1	protein_coding
V	9054111	9054871	761	-	WBGene00023417	swm-1	protein_coding
V	13621402	13621820	419	-	WBGene00023419	F53F4.16	protein_coding
V	9059723	9060479	757	+	WBGene00023431	C25E10.13	protein_coding
V	9355505	9356515	1011	-	WBGene00023485	ttr-49	protein_coding
V	10955923	10957047	1125	+	WBGene00023503	F17C11.13	protein_coding
V	20579546	20580690	1145	+	WBGene00023504	F26F2.8	protein_coding
V	4163222	4163611	390	+	WBGene00043666	Y45G5AM.4	protein_coding
V	6787952	6788460	509	+	WBGene00043952	ZC404.2	protein_coding
V	14281120	14282322	1203	-	WBGene00044002	srt-74	protein_coding
V	9628036	9629214	1179	-	WBGene00044011	T06E4.12	protein_coding
V	10502110	10503111	1002	-	WBGene00044024	C35A5.11	protein_coding
V	14082753	14083584	832	+	WBGene00044080	D1086.10	protein_coding
V	15338498	15339463	966	-	WBGene00044086	clec-228	protein_coding
V	3476405	3477596	1192	-	WBGene00044089	srbc-31	protein_coding
V	15829022	15830007	986	-	WBGene00044105	srbc-55	protein_coding
V	16298969	16299862	894	+	WBGene00044106	srbc-84	protein_coding
V	14240069	14241151	1083	-	WBGene00044109	K02E11.10	protein_coding
V	7521900	7522379	480	-	WBGene00044113	C54F6.15	protein_coding
V	2530146	2531174	1029	+	WBGene00044131	Y45G12C.16	protein_coding
V	10220981	10221417	437	-	WBGene00044174	fipr-5	protein_coding
V	10221662	10222021	360	+	WBGene00044175	fipr-9	protein_coding
V	14946784	14947122	339	-	WBGene00044178	C30G7.4	protein_coding
V	14688616	14688959	344	+	WBGene00044180	C47E8.11	protein_coding
V	16881901	16882310	410	-	WBGene00044181	F09C6.11	protein_coding
V	16882868	16883254	387	+	WBGene00044182	F09C6.12	protein_coding
V	16885044	16885490	447	+	WBGene00044183	F09C6.13	protein_coding
V	16210952	16211454	503	+	WBGene00044184	F11A5.16	protein_coding
V	16666340	16666747	408	-	WBGene00044185	F14F8.14	protein_coding
V	15577494	15578673	1180	-	WBGene00044188	F28F8.9	protein_coding
V	16502947	16503264	318	-	WBGene00044189	F36D3.14	protein_coding
V	9798888	9799176	289	-	WBGene00044192	F46B6.13	protein_coding
V	14318961	14319731	771	-	WBGene00044193	F47B8.13	protein_coding
V	14320546	14321313	768	+	WBGene00044194	F47B8.14	protein_coding
V	16875266	16876144	879	+	WBGene00044195	F49A5.10	protein_coding
V	19302733	19303730	998	-	WBGene00044197	fbxb-63	protein_coding
V	12628883	12629843	961	-	WBGene00044198	F56H9.6	protein_coding
V	15444916	15445420	505	+	WBGene00044206	T26H5.9	protein_coding
V	17614694	17615709	1016	-	WBGene00044207	Y6G8.5	protein_coding
V	17616473	17616904	432	-	WBGene00044208	Y6G8.6	protein_coding
V	18571833	18573026	1194	+	WBGene00044210	Y51A2D.21	protein_coding
V	17207208	17208145	938	-	WBGene00044212	Y68A4A.13	protein_coding
V	16926922	16927445	524	-	WBGene00044213	Y102A5C.36	protein_coding
V	18456874	18457329	456	+	WBGene00044215	ZK228.10	protein_coding
V	12373663	12374263	601	-	WBGene00044218	F23H12.10	protein_coding
V	14891082	14891186	105	+	WBGene00044271	nspa-2	protein_coding
V	14884716	14884820	105	+	WBGene00044272	nspa-4	protein_coding
V	14889407	14889511	105	-	WBGene00044273	nspa-6	protein_coding
V	14883039	14883143	105	-	WBGene00044274	nspa-7	protein_coding
V	14750353	14750457	105	-	WBGene00044275	nspa-10	protein_coding
V	16880979	16881728	750	+	WBGene00044278	F09C6.14	protein_coding
V	4884790	4885356	567	+	WBGene00044282	T19H12.12	protein_coding
V	19405729	19406394	666	+	WBGene00044291	C25F9.10	protein_coding
V	8311510	8312090	581	+	WBGene00044356	W02D7.12	protein_coding
V	271922	272937	1016	-	WBGene00044513	nlp-70	protein_coding
V	777600	778245	646	+	WBGene00044514	R09E12.9	protein_coding
V	1919322	1920205	884	-	WBGene00044516	Y32G9A.12	protein_coding
V	1957410	1957930	521	+	WBGene00044518	fipr-25	protein_coding
V	2013352	2013924	573	-	WBGene00044519	F59A7.11	protein_coding
V	2030177	2030407	231	+	WBGene00044520	F59A7.12	protein_coding
V	3125212	3125469	258	+	WBGene00044524	Y73C8C.12	protein_coding
V	3197268	3198333	1066	+	WBGene00044525	Y73C8B.5	protein_coding
V	3257577	3258304	728	+	WBGene00044526	T28A11.22	protein_coding
V	4365447	4366540	1094	-	WBGene00044530	F32D1.11	protein_coding
V	4386808	4387502	695	-	WBGene00044531	F13A2.9	protein_coding
V	5033399	5034171	773	+	WBGene00044535	K11D12.13	protein_coding
V	5240203	5240451	249	+	WBGene00044537	B0238.15	protein_coding
V	5754502	5755253	752	-	WBGene00044541	K09H11.11	protein_coding
V	5756493	5756657	165	+	WBGene00044543	C53A3.3	protein_coding
V	6576867	6577541	675	+	WBGene00044545	EGAP9.4	protein_coding
V	7129146	7129560	415	-	WBGene00044546	T01C4.8	protein_coding
V	7259265	7260041	777	+	WBGene00044547	C13A2.12	protein_coding
V	7399776	7400195	420	-	WBGene00044548	cnc-9	protein_coding
V	8005300	8006085	786	+	WBGene00044552	Y97E10AR.8	protein_coding
V	8602084	8602738	655	-	WBGene00044554	F41E6.15	protein_coding
V	4553872	4554498	627	+	WBGene00044586	Y61A9LA.12	protein_coding
V	15090757	15091114	358	+	WBGene00044658	C01G10.17	protein_coding
V	8383922	8384871	950	+	WBGene00044696	F52E1.14	protein_coding
V	15398939	15399791	853	-	WBGene00044759	T06E6.15	protein_coding
V	877525	878667	1143	-	WBGene00044776	T02B11.8	protein_coding
V	876245	877270	1026	+	WBGene00044777	T02B11.9	protein_coding
V	839421	839934	514	+	WBGene00044778	K09C6.10	protein_coding
V	15443330	15443808	479	-	WBGene00044783	T26H5.10	protein_coding
V	18773061	18774024	964	+	WBGene00044892	clec-257	protein_coding
V	1442342	1442917	576	+	WBGene00044900	cnc-11	protein_coding
V	13778015	13778592	578	+	WBGene00044921	F53C11.9	protein_coding
V	20310736	20311656	921	+	WBGene00045050	ZC15.10	protein_coding
V	13588202	13588506	305	+	WBGene00045195	F53F4.17	protein_coding
V	7414985	7415254	270	+	WBGene00045275	F18E3.12	protein_coding
V	7416164	7416433	270	+	WBGene00045276	F18E3.13	protein_coding
V	7814504	7814942	439	-	WBGene00045277	ZK742.6	protein_coding
V	5812316	5813137	822	-	WBGene00045305	ZC250.4	protein_coding
V	14300014	14300561	548	+	WBGene00045331	F14D7.12	protein_coding
V	19710845	19711746	902	-	WBGene00045344	Y43F8C.23	protein_coding
V	18749579	18750682	1104	-	WBGene00045362	F11D11.12	protein_coding
V	17069139	17069921	783	+	WBGene00045382	T05E12.8	protein_coding
V	1494769	1495453	685	+	WBGene00045390	C38C3.10	protein_coding
V	7954793	7955312	520	-	WBGene00045392	F26D11.12	protein_coding
V	12431370	12432289	920	-	WBGene00045400	C54D10.13	protein_coding
V	15193721	15194009	289	-	WBGene00045402	Y75B12B.13	protein_coding
V	14088351	14088704	354	+	WBGene00045406	D1086.19	protein_coding
V	19432447	19433072	626	-	WBGene00045411	C25F9.11	protein_coding
V	19402181	19402955	775	-	WBGene00045412	C25F9.12	protein_coding
V	19397828	19398982	1155	-	WBGene00045413	C25F9.13	protein_coding
V	18143745	18144720	976	+	WBGene00045416	Y37H2A.14	protein_coding
V	18142849	18143634	786	+	WBGene00045417	Y37H2A.13	protein_coding
V	18009980	18010837	858	-	WBGene00045459	Y59A8B.26	protein_coding
V	12751615	12752507	893	-	WBGene00045460	C15C8.8	protein_coding
V	19436484	19437217	734	+	WBGene00045461	C25F9.14	protein_coding
V	14309932	14310318	387	+	WBGene00045490	F14D7.14	protein_coding
V	16158679	16159694	1016	-	WBGene00045507	F10A3.17	protein_coding
V	16202030	16202865	836	+	WBGene00045510	F11A5.17	protein_coding
V	16062661	16062888	228	-	WBGene00045513	F14H3.14	protein_coding
V	12727154	12727636	483	+	WBGene00045517	R11D1.13	protein_coding
V	11062345	11063215	871	-	WBGene00050889	T04C12.9	protein_coding
V	18364858	18365037	180	+	WBGene00050891	C08E8.9	protein_coding
V	17802410	17802619	210	-	WBGene00050893	Y94A7B.11	protein_coding
V	17026138	17026389	252	-	WBGene00050894	F49H6.15	protein_coding
V	11251035	11251211	177	+	WBGene00050898	T19B10.12	protein_coding
V	17468613	17469280	668	-	WBGene00050906	F20E11.17	protein_coding
V	18395242	18395749	508	-	WBGene00050907	Y51A2B.9	protein_coding
V	19484721	19484920	200	+	WBGene00050910	Y43F8B.17	protein_coding
V	19485990	19486730	741	+	WBGene00050911	Y43F8B.18	protein_coding
V	14048817	14049660	844	-	WBGene00050929	F58D12.5	protein_coding
V	10205323	10205583	261	-	WBGene00050936	ZK856.16	protein_coding
V	14518351	14519368	1018	-	WBGene00050937	R02D5.8	protein_coding
V	15056173	15056791	619	+	WBGene00050940	C25D7.16	protein_coding
V	14875943	14876824	882	-	WBGene00050943	ZC412.10	protein_coding
V	10342055	10342938	884	+	WBGene00050947	K07C5.13	protein_coding
V	18162034	18162668	635	-	WBGene00050955	C14A6.12	protein_coding
V	20567575	20567916	342	+	WBGene00050959	F26F2.9	protein_coding
V	17019990	17020226	237	+	WBGene00050965	F49H6.17	protein_coding
V	13506621	13506785	165	+	WBGene00050968	R11G10.4	protein_coding
V	13839733	13840491	759	+	WBGene00077439	F55B12.10	protein_coding
V	18292595	18292944	350	+	WBGene00077445	Y51A2A.12	protein_coding
V	16893740	16894107	368	+	WBGene00077492	F09C6.15	protein_coding
V	17380232	17381119	888	+	WBGene00077495	Y20C6A.4	protein_coding
V	9489452	9489800	349	-	WBGene00077497	K06A4.10	protein_coding
V	9982868	9983932	1065	+	WBGene00077500	C27H6.9	protein_coding
V	10378929	10379393	465	-	WBGene00077503	AC3.12	protein_coding
V	11545527	11546554	1028	+	WBGene00077536	F38B7.10	protein_coding
V	13034205	13034704	500	-	WBGene00077565	W07G4.7	protein_coding
V	13590126	13590793	668	+	WBGene00077569	F53F4.18	protein_coding
V	14022140	14023174	1035	-	WBGene00077573	T08G5.15	protein_coding
V	14395043	14395802	760	+	WBGene00077576	C15H11.13	protein_coding
V	15029469	15030183	715	+	WBGene00077582	F14H8.8	protein_coding
V	15088382	15088713	332	-	WBGene00077583	C01G10.18	protein_coding
V	15116268	15116595	328	+	WBGene00077585	T01G5.8	protein_coding
V	15304607	15305602	996	-	WBGene00077588	T26H8.5	protein_coding
V	16032471	16033005	535	-	WBGene00077607	T10C6.16	protein_coding
V	16480295	16481019	725	-	WBGene00077616	F57E7.4	protein_coding
V	16727215	16727997	783	+	WBGene00077622	T25E12.14	protein_coding
V	16986460	16987135	676	-	WBGene00077624	Y102A5C.40	protein_coding
V	18728703	18729374	672	-	WBGene00077655	asp-19	protein_coding
V	19299562	19300488	927	+	WBGene00077663	F55C9.14	protein_coding
V	20814724	20815896	1173	+	WBGene00077681	Y44A6D.7	protein_coding
V	10922980	10923329	350	-	WBGene00077682	F58B4.7	protein_coding
V	9625422	9626269	848	+	WBGene00077691	T06E4.14	protein_coding
V	18339015	18339907	893	-	WBGene00077692	C08E8.10	protein_coding
V	11059520	11060289	770	-	WBGene00077693	T04C12.11	protein_coding
V	9739702	9740894	1193	+	WBGene00077696	marc-1	protein_coding
V	11040773	11041473	701	+	WBGene00077699	C45B11.8	protein_coding
V	11423557	11424665	1109	-	WBGene00077782	T26H10.2	protein_coding
V	10800725	10801198	474	-	WBGene00077783	D1054.18	protein_coding
V	13049185	13049560	376	-	WBGene00077788	W07G4.8	protein_coding
V	16644519	16645251	733	-	WBGene00086565	W06G6.17	protein_coding
V	12608093	12608957	865	-	WBGene00119204	ZC116.5	protein_coding
V	17613751	17614351	601	-	WBGene00138715	Y6G8.14	protein_coding
V	12992755	12992895	141	-	WBGene00138724	F15B9.11	protein_coding
V	11040320	11040675	356	+	WBGene00185117	C45B11.9	protein_coding
V	20383315	20384405	1091	+	WBGene00185118	K02E2.11	protein_coding
V	17700419	17700828	410	-	WBGene00189930	Y26G10.5	protein_coding
V	17699959	17700407	449	+	WBGene00189931	Y26G10.6	protein_coding
V	17696125	17696853	729	-	WBGene00189932	Y26G10.7	protein_coding
V	11547095	11548156	1062	+	WBGene00189933	F38B7.11	protein_coding
V	17609985	17610603	619	-	WBGene00189937	Y6G8.15	protein_coding
V	13931525	13932376	852	+	WBGene00189947	C06B3.16	protein_coding
V	10795794	10796828	1035	+	WBGene00194677	D1054.19	protein_coding
V	17154574	17155434	861	-	WBGene00194682	F40D4.17	protein_coding
V	20526435	20526837	403	+	WBGene00194689	Y38H6C.24	protein_coding
V	18322215	18323331	1117	-	WBGene00194695	B0462.5	protein_coding
V	19482835	19482984	150	+	WBGene00194699	Y43F8B.22	protein_coding
V	15426041	15426970	930	+	WBGene00194708	Y36E3A.2	protein_coding
V	11492756	11493413	658	+	WBGene00194712	T11F9.21	protein_coding
V	16733273	16733781	509	-	WBGene00194715	T25E12.16	protein_coding
V	20519227	20520062	836	+	WBGene00194744	Y38H6C.25	protein_coding
V	11390503	11390927	425	+	WBGene00194783	K03B8.14	protein_coding
V	11479706	11479976	271	+	WBGene00194784	T11F9.22	protein_coding
V	11996162	11996631	470	+	WBGene00194785	C52E4.12	protein_coding
V	12949907	12950248	342	+	WBGene00194787	T16G1.13	protein_coding
V	14482287	14482839	553	+	WBGene00194788	R02D5.10	protein_coding
V	16617762	16618080	319	+	WBGene00194799	Y70C5A.4	protein_coding
V	17606350	17606964	615	+	WBGene00194801	Y6G8.16	protein_coding
V	19434387	19434901	515	+	WBGene00194803	C25F9.16	protein_coding
V	3320343	3320532	190	-	WBGene00194898	C17B7.14	protein_coding
V	2120849	2121960	1112	-	WBGene00194908	F22F7.8	protein_coding
V	8035259	8036047	789	-	WBGene00194928	ZC513.14	protein_coding
V	18467944	18468197	254	-	WBGene00195061	ZK228.13	protein_coding
V	4385667	4386273	607	-	WBGene00195154	F13A2.10	protein_coding
V	10240573	10241188	616	-	WBGene00195157	C12D8.21	protein_coding
V	20595415	20595753	339	-	WBGene00195158	F26F2.11	protein_coding
V	4411646	4411814	169	-	WBGene00195160	Y47D7A.17	protein_coding
V	6288907	6289681	775	+	WBGene00195164	K12B6.11	protein_coding
V	19462912	19463891	980	+	WBGene00195177	Y43F8B.25	protein_coding
V	10409763	10410080	318	-	WBGene00195181	F15H10.12	protein_coding
V	19152279	19152428	150	-	WBGene00195240	Y39B6A.69	protein_coding
V	20192830	20193441	612	+	WBGene00195241	Y113G7B.27	protein_coding
V	20195986	20196416	431	+	WBGene00195242	Y113G7B.28	protein_coding
V	20606423	20606717	295	-	WBGene00195243	F46B3.23	protein_coding
V	12118003	12118719	717	+	WBGene00195250	C13C4.8	protein_coding
V	10539414	10539925	512	+	WBGene00195256	F25D1.8	protein_coding
V	15443827	15444288	462	-	WBGene00202495	T26H5.11	protein_coding
V	4787466	4788448	983	+	WBGene00202496	R02F11.9	protein_coding
V	4789123	4790045	923	+	WBGene00202497	R02F11.10	protein_coding
V	4785011	4785433	423	-	WBGene00202498	Y60C6A.2	protein_coding
V	5729692	5730883	1192	-	WBGene00202500	K09H11.15	protein_coding
V	6935503	6935978	476	-	WBGene00202501	Y57E12B.10	protein_coding
V	2260960	2261847	888	+	WBGene00202502	F41B5.12	protein_coding
V	16535472	16535884	413	+	WBGene00202504	Y32B12B.8	protein_coding
V	9058401	9059568	1168	-	WBGene00202512	C25E10.16	protein_coding
V	6521030	6522051	1022	+	WBGene00206358	F46E10.18	protein_coding
V	14954883	14955776	894	-	WBGene00206370	F02D8.9	protein_coding
V	10647561	10648114	554	+	WBGene00206383	C32C4.16	protein_coding
V	12624144	12624471	328	-	WBGene00206460	F56H9.9	protein_coding
V	15598928	15599862	935	-	WBGene00206462	B0391.14	protein_coding
V	10275402	10275646	245	-	WBGene00206471	Y22F5A.11	protein_coding
V	18750288	18750545	258	-	WBGene00206492	F11D11.21	protein_coding
V	17435678	17436592	915	-	WBGene00206495	F20E11.18	protein_coding
V	18397280	18397914	635	-	WBGene00206496	Y51A2B.16	protein_coding
V	10812063	10812344	282	+	WBGene00206498	C29A12.22	protein_coding
V	17893883	17894059	177	-	WBGene00206499	C06H5.11	protein_coding
V	19306641	19307006	366	-	WBGene00206500	F55C9.15	protein_coding
V	14289833	14290736	904	-	WBGene00206501	F14D7.18	protein_coding
V	15803711	15803848	138	-	WBGene00206503	T26E4.18	protein_coding
V	17290094	17290453	360	+	WBGene00206504	K10G4.15	protein_coding
V	17686079	17686952	874	-	WBGene00206506	F59A1.18	protein_coding
V	18280113	18280878	766	-	WBGene00206507	Y51A2A.16	protein_coding
V	18425103	18425644	542	-	WBGene00206508	ZK262.19	protein_coding
V	20134606	20135347	742	-	WBGene00206510	Y113G7A.22	protein_coding
V	15654424	15655237	814	+	WBGene00206516	F53E4.2	protein_coding
V	18802903	18803360	458	-	WBGene00206523	C54E10.10	protein_coding
V	18801388	18802177	790	-	WBGene00206524	C54E10.11	protein_coding
V	16301804	16302551	748	-	WBGene00206534	C31A11.13	protein_coding
V	19771493	19771760	268	-	WBGene00206535	M162.15	protein_coding
V	10687901	10688563	663	+	WBGene00219209	F29F11.20	protein_coding
V	17286042	17286401	360	-	WBGene00219212	K10G4.16	protein_coding
V	4673628	4674606	979	-	WBGene00219235	K03B4.8	protein_coding
V	19485319	19485873	555	+	WBGene00219302	Y43F8B.28	protein_coding
V	16648032	16648367	336	-	WBGene00219308	W06G6.20	protein_coding
V	20564354	20564776	423	+	WBGene00219309	F26F2.13	protein_coding
V	14708258	14708639	382	+	WBGene00219318	R08A2.9	protein_coding
V	14324823	14325464	642	-	WBGene00219324	F47B8.18	protein_coding
V	12760328	12761013	686	-	WBGene00219330	F18E2.15	protein_coding
V	12951304	12952095	792	+	WBGene00219337	T16G1.18	protein_coding
V	18434511	18435061	551	-	WBGene00219370	ZK262.20	protein_coding
V	17764831	17765177	347	-	WBGene00219381	C47A10.16	protein_coding
V	17251911	17252309	399	+	WBGene00219383	Y61B8A.6	protein_coding
V	16059781	16060235	455	-	WBGene00219414	F14H3.15	protein_coding
V	11146907	11147008	102	-	WBGene00219420	T19C4.24	protein_coding
V	17894785	17894985	201	+	WBGene00219445	C06H5.12	protein_coding
V	17897546	17897746	201	-	WBGene00219446	C06H5.13	protein_coding
V	17904129	17904329	201	+	WBGene00219447	C06H5.14	protein_coding
V	19252144	19253086	943	+	WBGene00219452	F21D9.11	protein_coding
V	19491602	19491820	219	+	WBGene00219455	Y43F8B.29	protein_coding
V	17530503	17530586	84	-	WBGene00219493	C18D4.12	protein_coding
V	10695481	10695612	132	+	WBGene00220253	C05A2.4	protein_coding
V	7386675	7387855	1181	-	WBGene00220257	C02H6.3	protein_coding
V	16652498	16653344	847	+	WBGene00235081	W06G6.21	protein_coding
V	7527453	7528008	556	+	WBGene00235092	C54F6.17	protein_coding
V	3236444	3236710	267	-	WBGene00235094	K08D9.9	protein_coding
V	7712213	7713172	960	-	WBGene00235114	ZK105.13	protein_coding
V	7356024	7356784	761	-	WBGene00235116	C03G6.21	protein_coding
V	6558766	6559205	440	-	WBGene00235118	K04A8.18	protein_coding
V	15449165	15449616	452	+	WBGene00235133	T26H5.14	protein_coding
V	4415965	4416810	846	-	WBGene00235165	Y47D7A.18	protein_coding
V	7860736	7861892	1157	-	WBGene00235308	C37C3.17	protein_coding
V	6949517	6949870	354	-	WBGene00235311	Y57E12B.11	protein_coding
V	8637191	8637766	576	-	WBGene00235312	F28A12.10	protein_coding
V	9046963	9047605	643	-	WBGene00235313	C25E10.17	protein_coding
V	1219781	1220565	785	-	WBGene00235315	Y50D4A.10	protein_coding
V	6554067	6554408	342	-	WBGene00235317	K04A8.19	protein_coding
V	3193558	3193951	394	+	WBGene00235321	Y73C8B.9	protein_coding
V	13276259	13276360	102	+	WBGene00235322	F32F2.4	protein_coding
V	2119829	2120215	387	+	WBGene00235326	F22F7.11	protein_coding
V	893968	894775	808	+	WBGene00235327	T02B11.10	protein_coding
V	9651594	9651764	171	+	WBGene00235328	T06E4.21	protein_coding
V	2892227	2892624	398	+	WBGene00235329	F37B4.15	protein_coding
V	9108519	9109167	649	+	WBGene00235330	F21C10.18	protein_coding
V	6549448	6549792	345	+	WBGene00235332	K04A8.20	protein_coding
V	14501340	14501435	96	+	WBGene00235335	R02D5.24	protein_coding
V	7545487	7545591	105	+	WBGene00235336	C54F6.19	protein_coding
V	16663347	16663616	270	-	WBGene00235339	F14F8.15	protein_coding
V	8575	8739	165	-	WBGene00255704	B0348.10	protein_coding
V	524796	525140	345	-	WBGene00255729	R11G11.16	protein_coding
V	889714	890523	810	-	WBGene00255731	T02B11.11	protein_coding
V	891135	891931	797	+	WBGene00255732	T02B11.12	protein_coding
V	892692	893537	846	-	WBGene00255733	T02B11.13	protein_coding
V	2050915	2051607	693	-	WBGene00268197	Y40B10A.11	protein_coding
V	2144020	2144508	489	-	WBGene00268198	F22F7.12	protein_coding
V	2148530	2149532	1003	-	WBGene00268199	C45H4.21	protein_coding
V	3350177	3350967	791	+	WBGene00268213	C17B7.15	protein_coding
V	3230897	3230974	78	+	WBGene00269352	K08D9.10	protein_coding
V	3281823	3282702	880	+	WBGene00269355	T28A11.25	protein_coding
V	4655475	4655786	312	+	WBGene00269385	F41F3.9	protein_coding
V	4216156	4216317	162	+	WBGene00269429	H43I07.4	protein_coding
V	4424351	4424731	381	+	WBGene00269437	Y47D7A.19	protein_coding
V	11052221	11053394	1174	+	WBGene00271444	T04C12.33	protein_coding
V	7721181	7722045	865	-	WBGene00271707	ZK105.14	protein_coding
V	7524747	7525440	694	+	WBGene00271796	C54F6.20	protein_coding
V	9375527	9376517	991	-	WBGene00271797	E02C12.19	protein_coding
V	18762344	18763526	1183	+	WBGene00271804	F11D11.22	protein_coding
V	7570640	7571055	416	-	WBGene00271807	F19F10.14	protein_coding
V	9131066	9131650	585	+	WBGene00271808	F21C10.19	protein_coding
V	6556653	6557135	483	-	WBGene00271815	K04A8.21	protein_coding
V	4790668	4791474	807	+	WBGene00271816	R02F11.12	protein_coding
V	4878916	4879351	436	-	WBGene00271827	T19H12.15	protein_coding
V	4785802	4786197	396	+	WBGene00271832	Y60C6A.3	protein_coding
V	2638890	2639449	560	+	WBGene00302982	W02H5.19	protein_coding
V	5535057	5536243	1187	-	WBGene00302991	cox-16	protein_coding
V	7854993	7856055	1063	+	WBGene00303000	C37C3.18	protein_coding
V	12255643	12256715	1073	+	WBGene00303013	T04H1.12	protein_coding
V	10134095	10134127	33	-	WBGene00303036	C08B6.18	protein_coding
V	7220982	7221023	42	-	WBGene00303039	C13F10.8	protein_coding
V	11022885	11022917	33	-	WBGene00303040	C13G3.12	protein_coding
V	12599087	12599128	42	-	WBGene00303041	C14C10.10	protein_coding
V	12302541	12302579	39	+	WBGene00303048	F55C5.17	protein_coding
V	20425342	20425389	48	+	WBGene00303059	F48F5.8	protein_coding
V	10043746	10043787	42	+	WBGene00303063	T06E8.8	protein_coding
V	12400767	12400814	48	-	WBGene00303067	K01D12.20	protein_coding
V	5049636	5049686	51	+	WBGene00303069	K11D12.14	protein_coding
V	12245001	12245030	30	-	WBGene00303076	T04H1.13	protein_coding
V	10478699	10478758	60	+	WBGene00303085	Y32F6B.9	protein_coding
V	982581	982622	42	+	WBGene00303091	Y50D4C.12	protein_coding
V	10204863	10204913	51	-	WBGene00303100	ZK856.19	protein_coding
V	5758217	5758880	664	-	WBGene00303231	C53A3.4	protein_coding
V	17865609	17865716	108	+	WBGene00303370	Y59A8A.8	protein_coding
V	17312343	17312486	144	-	WBGene00303378	Y61B8B.3	protein_coding
V	8187803	8188467	665	-	WBGene00303421	F20D6.15	protein_coding
V	11548230	11548964	735	-	WBGene00304181	F38B7.17	protein_coding
V	6950807	6951406	600	-	WBGene00304201	T07H8.11	protein_coding
V	14748911	14749087	177	-	WBGene00304930	Y50E8A.22	protein_coding
X	12792854	12793386	533	+	WBGene00000016	abf-5	protein_coding
X	12794118	12794870	753	+	WBGene00000017	abf-6	protein_coding
X	4458272	4459255	984	+	WBGene00000157	aps-2	protein_coding
X	6841258	6842121	864	+	WBGene00000210	asg-2	protein_coding
X	8299119	8299654	536	-	WBGene00000427	ced-13	protein_coding
X	4653167	4654157	991	-	WBGene00000428	ceh-1	protein_coding
X	10782927	10783922	996	-	WBGene00000525	clc-4	protein_coding
X	13590035	13591207	1173	+	WBGene00000598	col-9	protein_coding
X	421707	422691	985	+	WBGene00000608	col-19	protein_coding
X	13591475	13592543	1069	+	WBGene00000621	col-44	protein_coding
X	6280016	6280921	906	+	WBGene00000739	col-166	protein_coding
X	6323488	6324393	906	+	WBGene00000740	col-167	protein_coding
X	6326388	6327293	906	+	WBGene00000741	col-168	protein_coding
X	6329160	6330062	903	+	WBGene00000742	col-169	protein_coding
X	6331709	6332611	903	+	WBGene00000743	col-170	protein_coding
X	6334298	6335221	924	+	WBGene00000744	col-171	protein_coding
X	9233638	9234618	981	-	WBGene00000748	col-175	protein_coding
X	10077597	10078728	1132	+	WBGene00000749	col-176	protein_coding
X	11199455	11200467	1013	+	WBGene00000751	col-178	protein_coding
X	11201465	11202485	1021	+	WBGene00000752	col-179	protein_coding
X	11711378	11712280	903	-	WBGene00000753	col-180	protein_coding
X	12104930	12106102	1173	+	WBGene00000754	col-181	protein_coding
X	13466643	13467764	1122	-	WBGene00000756	col-183	protein_coding
X	13469455	13470409	955	+	WBGene00000757	col-184	protein_coding
X	13510035	13511097	1063	-	WBGene00000758	col-185	protein_coding
X	10075288	10076357	1070	+	WBGene00000930	dao-4	protein_coding
X	2144605	2145647	1043	-	WBGene00001065	dpy-3	protein_coding
X	1777288	1778088	801	-	WBGene00001237	elc-2	protein_coding
X	10475527	10475959	433	+	WBGene00001252	elt-4	protein_coding
X	10094430	10095245	816	-	WBGene00001445	flp-2	protein_coding
X	10091946	10092964	1019	-	WBGene00001446	flp-3	protein_coding
X	5885865	5886833	969	+	WBGene00001450	flp-7	protein_coding
X	14881419	14882267	849	+	WBGene00001451	flp-8	protein_coding
X	4677334	4678129	796	-	WBGene00001454	flp-11	protein_coding
X	4591281	4592350	1070	-	WBGene00001455	flp-12	protein_coding
X	10604686	10605831	1146	+	WBGene00001462	flp-19	protein_coding
X	9349276	9349894	619	-	WBGene00001463	flp-20	protein_coding
X	10819442	10820611	1170	-	WBGene00001495	F31B12.3	protein_coding
X	8501222	8502288	1067	+	WBGene00001693	grd-4	protein_coding
X	8500021	8501037	1017	+	WBGene00001703	grd-14	protein_coding
X	6449959	6450939	981	-	WBGene00001715	grl-6	protein_coding
X	7116202	7116996	795	-	WBGene00001841	hen-1	protein_coding
X	8159169	8160084	916	+	WBGene00001854	hil-3	protein_coding
X	14490094	14491119	1026	+	WBGene00001898	his-24	protein_coding
X	7309564	7309875	312	-	WBGene00001912	his-38	protein_coding
X	7310110	7310520	411	+	WBGene00001914	his-40	protein_coding
X	7981382	7982070	689	-	WBGene00001945	his-71	protein_coding
X	2412953	2413377	425	-	WBGene00001959	hlh-15	protein_coding
X	17551055	17552202	1148	+	WBGene00001967	hlh-28	protein_coding
X	17547492	17548639	1148	-	WBGene00001968	hlh-29	protein_coding
X	8866099	8866663	565	-	WBGene00002092	ins-9	protein_coding
X	3259142	3259812	671	+	WBGene00002253	lbp-1	protein_coding
X	3260610	3261470	861	+	WBGene00002254	lbp-2	protein_coding
X	3257372	3258155	784	+	WBGene00002255	lbp-3	protein_coding
X	9852041	9853002	962	+	WBGene00002270	lec-7	protein_coding
X	9850571	9851336	766	+	WBGene00002271	lec-8	protein_coding
X	17600487	17601503	1017	+	WBGene00002272	lec-9	protein_coding
X	2229055	2230122	1068	-	WBGene00003018	lin-32	protein_coding
X	12430609	12431133	525	+	WBGene00003180	med-1	protein_coding
X	17455792	17456586	795	-	WBGene00003370	mlc-2	protein_coding
X	13349639	13350804	1166	-	WBGene00003511	mxl-3	protein_coding
X	3727574	3728446	873	+	WBGene00003739	nlp-1	protein_coding
X	2343947	2344766	820	-	WBGene00003740	nlp-2	protein_coding
X	13177856	13178447	592	-	WBGene00003741	nlp-3	protein_coding
X	8593181	8594036	856	+	WBGene00003745	nlp-7	protein_coding
X	10958727	10959253	527	+	WBGene00003757	nlp-19	protein_coding
X	2341359	2342089	731	-	WBGene00003760	nlp-22	protein_coding
X	2342391	2342959	569	-	WBGene00003761	nlp-23	protein_coding
X	6159377	6160527	1151	-	WBGene00003846	odd-2	protein_coding
X	5353103	5354072	970	-	WBGene00003990	pfn-2	protein_coding
X	1952479	1953560	1082	-	WBGene00004351	rgs-8.1	protein_coding
X	2241738	2242618	881	-	WBGene00004423	rpl-11.2	protein_coding
X	4715178	4715796	619	+	WBGene00004438	rpl-25.1	protein_coding
X	13224241	13224708	468	-	WBGene00004825	skr-19	protein_coding
X	13223016	13223537	522	-	WBGene00004826	skr-20	protein_coding
X	13226134	13226664	531	-	WBGene00004827	skr-21	protein_coding
X	7315995	7316818	824	-	WBGene00004987	spp-2	protein_coding
X	7314969	7315353	385	-	WBGene00004988	spp-3	protein_coding
X	7318239	7318756	518	-	WBGene00004989	spp-4	protein_coding
X	7319937	7320354	418	-	WBGene00004990	spp-5	protein_coding
X	7317341	7317712	372	+	WBGene00004991	spp-6	protein_coding
X	11487784	11488203	420	+	WBGene00004994	spp-9	protein_coding
X	8417419	8418524	1106	-	WBGene00004998	spp-13	protein_coding
X	7725979	7726383	405	+	WBGene00004999	spp-14	protein_coding
X	13291806	13292984	1179	+	WBGene00005116	srd-38	protein_coding
X	12332095	12333302	1208	+	WBGene00005124	srd-46	protein_coding
X	14233944	14235032	1089	-	WBGene00005194	srg-37	protein_coding
X	8789456	8790621	1166	+	WBGene00006764	unc-27	protein_coding
X	8087553	8088574	1022	-	WBGene00006890	vem-1	protein_coding
X	11307356	11308518	1163	+	WBGene00006922	vhl-1	protein_coding
X	11852794	11853729	936	+	WBGene00006965	xtr-1	protein_coding
X	12340377	12341438	1062	-	WBGene00006979	zig-2	protein_coding
X	7930750	7931808	1059	+	WBGene00006980	zig-3	protein_coding
X	7925434	7926595	1162	+	WBGene00006981	zig-4	protein_coding
X	226651	227394	744	-	WBGene00007076	AC8.4	protein_coding
X	13664583	13665380	798	+	WBGene00007288	C04A11.5	protein_coding
X	12287659	12288354	696	-	WBGene00007293	C04B4.5	protein_coding
X	12275042	12275677	636	-	WBGene00007294	C04B4.6	protein_coding
X	12945534	12946633	1100	-	WBGene00007345	C05E7.3	protein_coding
X	14750849	14752011	1163	-	WBGene00007349	C05G5.3	protein_coding
X	10174983	10175896	914	+	WBGene00007398	C07A4.3	protein_coding
X	9516364	9517206	843	-	WBGene00007407	C07B5.2	protein_coding
X	9522488	9523218	731	-	WBGene00007408	C07B5.3	protein_coding
X	9587942	9588879	938	+	WBGene00007517	gpx-3	protein_coding
X	14852552	14853762	1211	-	WBGene00007771	C27C12.1	protein_coding
X	13418840	13419934	1095	-	WBGene00007812	C29F7.3	protein_coding
X	14001924	14003080	1157	+	WBGene00007848	cytb-5.1	protein_coding
X	10489063	10489821	759	+	WBGene00007895	C33D3.4	protein_coding
X	11804210	11805412	1203	+	WBGene00007937	C34E11.4	protein_coding
X	11536568	11537124	557	+	WBGene00007958	C35C5.9	protein_coding
X	10444136	10444674	539	+	WBGene00008023	C39B10.3	protein_coding
X	10445005	10445439	435	+	WBGene00008024	C39B10.4	protein_coding
X	10447343	10447948	606	+	WBGene00008025	C39B10.5	protein_coding
X	13651099	13651923	825	+	WBGene00008037	C40C9.4	protein_coding
X	11690314	11690789	476	+	WBGene00008090	C44C10.10	protein_coding
X	11982717	11983626	910	-	WBGene00008207	C49F5.3	protein_coding
X	11986187	11987355	1169	+	WBGene00008209	C49F5.5	protein_coding
X	11994784	11995839	1056	+	WBGene00008211	C49F5.7	protein_coding
X	12845723	12846143	421	-	WBGene00008261	C52G5.3	protein_coding
X	14514130	14515073	944	-	WBGene00008354	gcsh-1	protein_coding
X	14529788	14530207	420	-	WBGene00008356	nspc-20	protein_coding
X	14523575	14524021	447	+	WBGene00008357	nspc-16	protein_coding
X	14527170	14527659	490	-	WBGene00008358	nspc-18	protein_coding
X	14524754	14525181	428	-	WBGene00008359	nspc-17	protein_coding
X	14528699	14529114	416	+	WBGene00008360	nspc-19	protein_coding
X	11728151	11728891	741	+	WBGene00008367	D1053.2	protein_coding
X	14254295	14255131	837	-	WBGene00008463	E02H4.5	protein_coding
X	13396973	13397782	810	+	WBGene00008517	F02C12.3	protein_coding
X	11407054	11407732	679	-	WBGene00008572	F08B12.4	protein_coding
X	11317050	11318055	1006	+	WBGene00008589	nlp-57	protein_coding
X	10160627	10161810	1184	+	WBGene00008603	F09B9.4	protein_coding
X	10681998	10682970	973	+	WBGene00008747	phf-31	protein_coding
X	10520817	10521413	597	-	WBGene00008807	F14F3.4	protein_coding
X	14108545	14109714	1170	+	WBGene00008883	F16B12.7	protein_coding
X	13126109	13126520	412	-	WBGene00008928	F17H10.4	protein_coding
X	14982140	14982804	665	-	WBGene00008976	plp-2	protein_coding
X	14979688	14980140	453	+	WBGene00008980	emre-1	protein_coding
X	16217408	16217596	189	+	WBGene00009067	F23A7.1	protein_coding
X	16212606	16212812	207	+	WBGene00009069	F23A7.4	protein_coding
X	14442621	14443450	830	+	WBGene00009087	F23D12.3	protein_coding
X	14423405	14423883	479	+	WBGene00009090	fipr-3	protein_coding
X	14453557	14453835	279	-	WBGene00009091	F23D12.7	protein_coding
X	14116111	14116751	641	+	WBGene00009235	F28H6.7	protein_coding
X	10804741	10805595	855	+	WBGene00009283	F31B12.4	protein_coding
X	14867101	14868300	1200	-	WBGene00009300	F31F6.1	protein_coding
X	14871836	14872867	1032	-	WBGene00009302	F31F6.3	protein_coding
X	9626124	9626467	344	+	WBGene00009378	F34H10.1	protein_coding
X	11278401	11279376	976	-	WBGene00009529	F38B2.2	protein_coding
X	11286578	11287717	1140	-	WBGene00009531	F38B2.4	protein_coding
X	10302741	10303143	403	+	WBGene00009620	fip-5	protein_coding
X	10304529	10304867	339	+	WBGene00009621	fipr-21	protein_coding
X	10306595	10306951	357	+	WBGene00009624	cnc-8	protein_coding
X	11374599	11375609	1011	-	WBGene00009633	F42E11.3	protein_coding
X	12342946	12343379	434	-	WBGene00009634	nspc-9	protein_coding
X	12350578	12351788	1211	+	WBGene00009635	F42F12.3	protein_coding
X	12351995	12352947	953	-	WBGene00009636	F42F12.4	protein_coding
X	12357427	12357919	493	+	WBGene00009637	nspc-13	protein_coding
X	12358614	12359057	444	-	WBGene00009638	nspc-14	protein_coding
X	12360744	12361159	416	+	WBGene00009639	nspc-15	protein_coding
X	12343609	12344043	435	+	WBGene00009640	nspc-10	protein_coding
X	10214443	10215495	1053	-	WBGene00009676	F44A6.4	protein_coding
X	14960531	14961571	1041	-	WBGene00009720	F45B8.3	protein_coding
X	12502868	12503338	471	-	WBGene00009728	sdz-19	protein_coding
X	15259579	15260287	709	-	WBGene00009787	F46F2.3	protein_coding
X	10891265	10891976	712	+	WBGene00009815	F47B10.4	protein_coding
X	10888501	10889106	606	+	WBGene00009817	F47B10.6	protein_coding
X	13977829	13979031	1203	+	WBGene00009851	F48F7.6	protein_coding
X	16282710	16283203	494	-	WBGene00009933	F52E10.2	protein_coding
X	15857153	15857974	822	+	WBGene00010007	F53H4.2	protein_coding
X	13592667	13593610	944	+	WBGene00010027	F54B11.4	protein_coding
X	13600436	13601534	1099	+	WBGene00010030	F54B11.7	protein_coding
X	13582120	13582757	638	+	WBGene00010033	F54B11.10	protein_coding
X	11849392	11850182	791	-	WBGene00010065	F54F7.3	protein_coding
X	11009512	11010665	1154	-	WBGene00010224	F58A3.4	protein_coding
X	11008268	11009054	787	-	WBGene00010225	ttr-31	protein_coding
X	15646385	15647369	985	-	WBGene00010332	F59D12.5	protein_coding
X	15841572	15842379	808	+	WBGene00010337	serp-1.1	protein_coding
X	10542998	10543569	572	+	WBGene00010343	F59F5.4	protein_coding
X	15053883	15054474	592	+	WBGene00010358	H03G16.1	protein_coding
X	15056133	15056837	705	-	WBGene00010361	H03G16.5	protein_coding
X	12273638	12273970	333	-	WBGene00010404	H19J13.2	protein_coding
X	13706907	13707957	1051	+	WBGene00010504	K02D3.1	protein_coding
X	14245591	14246618	1028	-	WBGene00010554	mlc-6	protein_coding
X	14335520	14335861	342	+	WBGene00010570	K04G11.1	protein_coding
X	13234105	13234979	875	-	WBGene00010689	K08H2.2	protein_coding
X	13237402	13238541	1140	+	WBGene00010690	K08H2.3	protein_coding
X	13247635	13248437	803	-	WBGene00010693	K08H2.7	protein_coding
X	10950683	10951393	711	-	WBGene00010717	K09C8.7	protein_coding
X	13843976	13844676	701	+	WBGene00010837	M03B6.5	protein_coding
X	12142869	12143825	957	+	WBGene00010926	M153.3	protein_coding
X	14503375	14503824	450	-	WBGene00010935	M163.1	protein_coding
X	14464813	14465703	891	+	WBGene00010939	M163.7	protein_coding
X	14485127	14485955	829	+	WBGene00010940	M163.8	protein_coding
X	13565486	13566536	1051	-	WBGene00010968	R01E6.2	protein_coding
X	13537059	13538109	1051	+	WBGene00010969	R01E6.5	protein_coding
X	15433787	15434972	1186	+	WBGene00010982	flp-32	protein_coding
X	13287836	13288815	980	-	WBGene00011012	R04D3.4	protein_coding
X	9869120	9869574	455	+	WBGene00011079	R07B1.7	protein_coding
X	10336438	10337168	731	+	WBGene00011103	R07E3.2	protein_coding
X	11116107	11116823	717	-	WBGene00011141	nlp-66	protein_coding
X	16210421	16210618	198	-	WBGene00011229	R11.4	protein_coding
X	10716325	10717119	795	-	WBGene00011317	T01C1.4	protein_coding
X	11658631	11659433	803	+	WBGene00011442	T04F8.3	protein_coding
X	11647465	11648196	732	+	WBGene00011446	T04F8.8	protein_coding
X	162529	163134	606	-	WBGene00011606	tmed-12	protein_coding
X	177396	177856	461	+	WBGene00011609	T08D2.4	protein_coding
X	11955425	11956506	1082	+	WBGene00011616	T08D10.3	protein_coding
X	15164408	15164855	448	+	WBGene00011685	T10B10.9	protein_coding
X	12862971	12863896	926	-	WBGene00011772	T14G8.4	protein_coding
X	12463804	12464444	641	+	WBGene00011822	T18D3.5	protein_coding
X	10880809	10881637	829	+	WBGene00011902	T21E8.4	protein_coding
X	10886172	10887242	1071	+	WBGene00011903	T21E8.5	protein_coding
X	14545843	14546819	977	+	WBGene00011981	enri-2	protein_coding
X	14543524	14544689	1166	+	WBGene00011982	T24C2.3	protein_coding
X	12597168	12597437	270	+	WBGene00011992	T24D5.4	protein_coding
X	16062685	16063290	606	+	WBGene00012075	T27A8.3	protein_coding
X	12294563	12295542	980	+	WBGene00012299	W06D11.1	protein_coding
X	12296047	12296730	684	-	WBGene00012300	W06D11.2	protein_coding
X	12300134	12301282	1149	+	WBGene00012303	W06D11.5	protein_coding
X	16245194	16245512	319	+	WBGene00012378	W10G6.1	protein_coding
X	15771708	15772735	1028	-	WBGene00012408	Y7A5A.2	protein_coding
X	15783947	15784670	724	-	WBGene00012409	Y7A5A.3	protein_coding
X	15786529	15786826	298	-	WBGene00012411	Y7A5A.5	protein_coding
X	15799432	15799695	264	-	WBGene00012412	Y7A5A.6	protein_coding
X	15822497	15823272	776	+	WBGene00012414	Y7A5A.8	protein_coding
X	15827166	15827844	679	+	WBGene00012415	Y7A5A.9	protein_coding
X	13618874	13619930	1057	+	WBGene00012440	nlp-53	protein_coding
X	14383251	14383862	612	+	WBGene00013370	Y60A9.3	protein_coding
X	14376955	14377269	315	-	WBGene00013371	Y60A9A.1	protein_coding
X	11877311	11878209	899	-	WBGene00013390	Y62H9A.2	protein_coding
X	11879110	11879971	862	-	WBGene00013391	Y62H9A.3	protein_coding
X	11880126	11881226	1101	+	WBGene00013392	Y62H9A.4	protein_coding
X	11882144	11882900	757	-	WBGene00013393	Y62H9A.5	protein_coding
X	11883127	11884042	916	+	WBGene00013394	ule-5	protein_coding
X	11917005	11917656	652	+	WBGene00013401	Y62H9A.13	protein_coding
X	10057925	10058432	508	-	WBGene00013867	ZC373.2	protein_coding
X	10060525	10061681	1157	+	WBGene00013868	ZC373.3	protein_coding
X	9446644	9447819	1176	+	WBGene00014140	ZK899.1	protein_coding
X	9459911	9460934	1024	-	WBGene00014143	ZK899.5	protein_coding
X	15076690	15077744	1055	-	WBGene00014793	H40L08.2	protein_coding
X	1896662	1897343	682	-	WBGene00015117	B0294.1	protein_coding
X	1892187	1893272	1086	+	WBGene00015118	B0294.3	protein_coding
X	17178539	17178992	454	+	WBGene00015119	B0302.2	protein_coding
X	17176490	17176777	288	-	WBGene00015121	B0302.4	protein_coding
X	530551	531009	459	-	WBGene00015142	B0310.6	protein_coding
X	2894573	2894809	237	+	WBGene00015170	B0410.1	protein_coding
X	2890569	2891491	923	-	WBGene00015172	B0410.3	protein_coding
X	9299146	9300160	1015	+	WBGene00015178	B0416.2	protein_coding
X	9278953	9279947	995	+	WBGene00015180	B0416.4	protein_coding
X	9296947	9297934	988	-	WBGene00015182	B0416.7	protein_coding
X	9171541	9172336	796	+	WBGene00015261	B0563.1	protein_coding
X	9173510	9174509	1000	-	WBGene00015265	B0563.8	protein_coding
X	8147698	8148675	978	+	WBGene00015320	C02B8.1	protein_coding
X	8139446	8140243	798	+	WBGene00015322	C02B8.3	protein_coding
X	8137721	8137879	159	-	WBGene00015325	C02B8.7	protein_coding
X	3668086	3668942	857	-	WBGene00015354	snet-1	protein_coding
X	6374751	6375592	842	+	WBGene00015372	C03B1.1	protein_coding
X	6366015	6366831	817	+	WBGene00015374	C03B1.3	protein_coding
X	6346359	6347113	755	-	WBGene00015379	C03B1.9	protein_coding
X	6357747	6357872	126	-	WBGene00015380	C03B1.10	protein_coding
X	8541862	8542283	422	+	WBGene00015392	nspc-7	protein_coding
X	4586917	4588048	1132	+	WBGene00015493	C05E11.2	protein_coding
X	4562163	4563125	963	+	WBGene00015495	C05E11.6	protein_coding
X	8879649	8880406	758	+	WBGene00015528	C06E2.2	protein_coding
X	8857056	8857954	899	-	WBGene00015529	C06E2.5	protein_coding
X	16621807	16622745	939	+	WBGene00015546	cpg-19	protein_coding
X	4544843	4545733	891	+	WBGene00015560	C07A12.2	protein_coding
X	7344047	7344551	505	+	WBGene00015564	C07D8.5	protein_coding
X	7390570	7391442	873	+	WBGene00015667	C10A4.6	protein_coding
X	1826466	1827354	889	+	WBGene00015770	C14E2.1	protein_coding
X	1810686	1811536	851	-	WBGene00015772	C14E2.3	protein_coding
X	6238123	6239065	943	-	WBGene00015781	rml-3	protein_coding
X	6208160	6208563	404	-	WBGene00015782	C14F11.7	protein_coding
X	6467284	6467562	279	-	WBGene00015785	C15B12.3	protein_coding
X	3164525	3165659	1135	+	WBGene00015789	syx-6	protein_coding
X	6127528	6128275	748	-	WBGene00015803	C15H9.9	protein_coding
X	6102882	6103397	516	-	WBGene00015805	C15H9.11	protein_coding
X	3968140	3968634	495	-	WBGene00015823	C16B8.3	protein_coding
X	8181139	8181640	502	-	WBGene00015924	C17H11.4	protein_coding
X	8069328	8070289	962	+	WBGene00015947	C18A11.1	protein_coding
X	8067568	8068097	530	+	WBGene00015948	C18A11.2	protein_coding
X	4328400	4328916	517	-	WBGene00016039	C24A8.5	protein_coding
X	5061056	5062209	1154	+	WBGene00016069	C24H10.3	protein_coding
X	5058160	5059263	1104	-	WBGene00016070	C24H10.4	protein_coding
X	5450008	5450823	816	-	WBGene00016105	C25F6.6	protein_coding
X	5342307	5342848	542	+	WBGene00016136	C26B9.7	protein_coding
X	17305220	17306370	1151	+	WBGene00016345	C33E10.1	protein_coding
X	17300840	17302000	1161	-	WBGene00016350	C33E10.10	protein_coding
X	7101777	7102231	455	+	WBGene00016466	C36B7.3	protein_coding
X	7906964	7907119	156	+	WBGene00016529	C39D10.1	protein_coding
X	7889215	7889765	551	+	WBGene00016530	C39D10.2	protein_coding
X	7879771	7880948	1178	-	WBGene00016535	C39D10.8	protein_coding
X	4754678	4755118	441	-	WBGene00016537	C39E6.2	protein_coding
X	969074	970270	1197	-	WBGene00016645	C44C1.6	protein_coding
X	6086124	6086567	444	+	WBGene00016658	C45B2.1	protein_coding
X	6084739	6085189	451	+	WBGene00016659	C45B2.2	protein_coding
X	6082960	6083412	453	+	WBGene00016660	C45B2.3	protein_coding
X	6087976	6088412	437	+	WBGene00016662	C45B2.8	protein_coding
X	8215065	8215671	607	+	WBGene00016738	C47D2.1	protein_coding
X	4273914	4275017	1104	+	WBGene00016869	C52B9.10	protein_coding
X	4284189	4284922	734	+	WBGene00016870	ets-10	protein_coding
X	6846234	6847425	1192	+	WBGene00016893	C53B7.2	protein_coding
X	6868632	6868769	138	-	WBGene00016895	C53B7.6	protein_coding
X	17310908	17311213	306	+	WBGene00016901	C53C11.4	protein_coding
X	7139875	7140566	692	+	WBGene00016912	clec-86	protein_coding
X	7838882	7839381	500	+	WBGene00016916	C54D2.2	protein_coding
X	7187355	7187702	348	-	WBGene00016940	C55B6.4	protein_coding
X	7204579	7205295	717	-	WBGene00016941	C55B6.5	protein_coding
X	7365567	7365962	396	+	WBGene00016985	C56G3.2	protein_coding
X	1452695	1453868	1174	-	WBGene00016997	cebp-1	protein_coding
X	1484853	1485818	966	-	WBGene00016998	D1005.4	protein_coding
X	8939220	8940159	940	-	WBGene00017014	dylt-2	protein_coding
X	8726794	8727406	613	-	WBGene00017149	EGAP4.1	protein_coding
X	5163055	5163565	511	+	WBGene00017150	EGAP5.1	protein_coding
X	1706370	1706638	269	-	WBGene00017224	F07G6.5	protein_coding
X	1720042	1720459	418	-	WBGene00017227	F07G6.8	protein_coding
X	8413430	8414195	766	+	WBGene00017258	F08F1.4	protein_coding
X	8409787	8410854	1068	-	WBGene00017259	F08F1.9	protein_coding
X	1502790	1503278	489	+	WBGene00017294	F09E10.1	protein_coding
X	4110442	4111440	999	-	WBGene00017307	F09F9.2	protein_coding
X	17396814	17397798	985	+	WBGene00017376	F11C7.2	protein_coding
X	17401564	17402610	1047	+	WBGene00017378	F11C7.6	protein_coding
X	17398593	17399357	765	+	WBGene00017379	F11C7.7	protein_coding
X	3325166	3326275	1110	-	WBGene00017383	F11D5.6	protein_coding
X	8646606	8647097	492	-	WBGene00017401	F12D9.2	protein_coding
X	8285683	8286785	1103	+	WBGene00017420	F13B9.2	protein_coding
X	6904721	6905849	1129	+	WBGene00017445	sid-5	protein_coding
X	4357011	4357567	557	-	WBGene00017473	F14H12.6	protein_coding
X	4361871	4362622	752	-	WBGene00017474	F14H12.7	protein_coding
X	4440941	4441726	786	+	WBGene00017476	F15A8.1	protein_coding
X	8601535	8602366	832	+	WBGene00017568	F18E9.1	protein_coding
X	1431007	1431486	480	+	WBGene00017609	F19G12.1	protein_coding
X	1417304	1417477	174	+	WBGene00017612	F19G12.4	protein_coding
X	4198819	4199929	1111	-	WBGene00017629	F20B6.5	protein_coding
X	4201873	4202214	342	-	WBGene00017630	F20B6.6	protein_coding
X	1343758	1344421	664	-	WBGene00017668	ins-39	protein_coding
X	6512285	6512918	634	+	WBGene00017688	ttr-35	protein_coding
X	8149559	8150721	1163	-	WBGene00017714	F22F1.2	protein_coding
X	5992099	5992870	772	-	WBGene00017718	F22F4.5	protein_coding
X	16702442	16703440	999	+	WBGene00017725	F22H10.1	protein_coding
X	16679540	16679797	258	+	WBGene00017726	F22H10.2	protein_coding
X	16677468	16677707	240	-	WBGene00017727	F22H10.3	protein_coding
X	7627651	7628233	583	+	WBGene00017813	nlp-61	protein_coding
X	3205078	3205835	758	+	WBGene00017890	F28B4.1	protein_coding
X	543107	544256	1150	+	WBGene00017896	F28C10.1	protein_coding
X	17532950	17534064	1115	-	WBGene00017938	F31A3.3	protein_coding
X	3805137	3805749	613	+	WBGene00018025	F35A5.2	protein_coding
X	16451942	16452559	618	+	WBGene00018186	F38E9.4	protein_coding
X	17578692	17579111	420	-	WBGene00018192	F39B3.3	protein_coding
X	16894877	16896035	1159	+	WBGene00018202	F39F10.2	protein_coding
X	16891983	16893148	1166	+	WBGene00018203	F39F10.3	protein_coding
X	16912972	16913769	798	-	WBGene00018205	F39F10.5	protein_coding
X	6835491	6836115	625	-	WBGene00018259	F41B4.3	protein_coding
X	6880938	6881895	958	-	WBGene00018279	F41C6.6	protein_coding
X	8003733	8004077	345	+	WBGene00018463	F45E1.2	protein_coding
X	3788026	3788526	501	+	WBGene00018532	F47B7.1	protein_coding
X	3767795	3768817	1023	-	WBGene00018536	F47B7.5	protein_coding
X	9077186	9077733	548	+	WBGene00018565	F47E1.1	protein_coding
X	2163384	2164069	686	+	WBGene00018590	pdf-2	protein_coding
X	4246554	4247212	659	-	WBGene00018602	F48D6.4	protein_coding
X	2084375	2085057	683	+	WBGene00018654	F49H12.3	protein_coding
X	1975992	1976594	603	+	WBGene00018688	F52D2.6	protein_coding
X	2540066	2541053	988	-	WBGene00018715	F52H2.3	protein_coding
X	8711595	8711828	234	+	WBGene00018724	F53A9.1	protein_coding
X	8709764	8710015	252	+	WBGene00018725	kreg-1	protein_coding
X	8708353	8709404	1052	+	WBGene00018726	F53A9.3	protein_coding
X	8713544	8713804	261	-	WBGene00018729	F53A9.6	protein_coding
X	8716665	8716922	258	-	WBGene00018730	F53A9.7	protein_coding
X	8718641	8718904	264	-	WBGene00018731	F53A9.8	protein_coding
X	8720315	8720758	444	-	WBGene00018732	F53A9.9	protein_coding
X	5489838	5490113	276	+	WBGene00018875	F55D1.1	protein_coding
X	8341975	8342286	312	+	WBGene00018881	F55E10.1	protein_coding
X	8340693	8340986	294	+	WBGene00018882	F55E10.2	protein_coding
X	8327559	8327900	342	-	WBGene00018883	F55E10.4	protein_coding
X	2769608	2770060	453	-	WBGene00018888	F55F1.2	protein_coding
X	3531841	3533019	1179	-	WBGene00018937	F56B6.6	protein_coding
X	1387317	1388160	844	+	WBGene00018938	F56C3.1	protein_coding
X	1357771	1358395	625	-	WBGene00018940	F56C3.3	protein_coding
X	1359594	1360731	1138	-	WBGene00018941	F56C3.4	protein_coding
X	1370543	1370786	244	-	WBGene00018944	F56C3.7	protein_coding
X	1384318	1384638	321	-	WBGene00018945	F56C3.8	protein_coding
X	5904653	5905345	693	+	WBGene00019160	nlp-49	protein_coding
X	6783157	6784273	1117	+	WBGene00019226	H22K11.3	protein_coding
X	8219728	8220064	337	+	WBGene00019292	K02A6.1	protein_coding
X	8224315	8225016	702	-	WBGene00019293	K02A6.2	protein_coding
X	6462029	6463228	1200	+	WBGene00019383	K04E7.1	protein_coding
X	16501332	16501943	612	+	WBGene00019422	K05G3.1	protein_coding
X	1534342	1535361	1020	-	WBGene00019437	K06A9.3	protein_coding
X	3271353	3271773	421	-	WBGene00019553	K09C4.9	protein_coding
X	17117659	17117988	330	+	WBGene00019574	K09E3.2	protein_coding
X	7710432	7710743	312	-	WBGene00019583	K09F5.4	protein_coding
X	3135486	3136663	1178	+	WBGene00019609	K10B3.1	protein_coding
X	6451441	6451782	342	+	WBGene00019621	K10C2.6	protein_coding
X	6442655	6443473	819	-	WBGene00019622	K10C2.7	protein_coding
X	706790	707708	919	+	WBGene00019722	M02A10.1	protein_coding
X	8739673	8740171	499	+	WBGene00019728	M02D8.2	protein_coding
X	8731310	8731922	613	-	WBGene00019732	M02D8.6	protein_coding
X	3033325	3034303	979	-	WBGene00019736	M02F4.2	protein_coding
X	4957329	4957418	90	-	WBGene00019758	M03F4.4	protein_coding
X	7798949	7799780	832	-	WBGene00019846	gpx-7	protein_coding
X	404897	405357	461	+	WBGene00019861	R04A9.1	protein_coding
X	8796545	8797262	718	-	WBGene00019870	R04E5.7	protein_coding
X	5953458	5953730	273	+	WBGene00019937	R07E4.3	protein_coding
X	4376608	4376901	294	-	WBGene00020119	R160.2	protein_coding
X	4365305	4366331	1027	-	WBGene00020120	R160.3	protein_coding
X	4368365	4368900	536	-	WBGene00020121	R160.4	protein_coding
X	4370014	4370856	843	-	WBGene00020122	R160.5	protein_coding
X	4372361	4373223	863	-	WBGene00020123	R160.6	protein_coding
X	7029136	7029640	505	+	WBGene00020126	flp-26	protein_coding
X	1154948	1155640	693	+	WBGene00020127	R193.1	protein_coding
X	2337600	2338310	711	-	WBGene00020136	nlp-45	protein_coding
X	16786438	16787620	1183	+	WBGene00020143	T01C8.2	protein_coding
X	767023	768069	1047	-	WBGene00020216	trap-2	protein_coding
X	770837	771882	1046	+	WBGene00020218	T04G9.7	protein_coding
X	2442970	2443404	435	-	WBGene00020302	T07D1.3	protein_coding
X	7330949	7331903	955	+	WBGene00020335	ttr-30	protein_coding
X	7329818	7330669	852	+	WBGene00020339	ttr-59	protein_coding
X	6180593	6181431	839	+	WBGene00020487	T13C5.7	protein_coding
X	1193148	1193858	711	+	WBGene00020488	T13G4.1	protein_coding
X	6542992	6543983	992	+	WBGene00020505	T14E8.2	protein_coding
X	3758699	3759445	747	-	WBGene00020515	T14G12.6	protein_coding
X	3939250	3940139	890	+	WBGene00020568	T19D2.3	protein_coding
X	669684	670800	1117	-	WBGene00020574	T19D7.6	protein_coding
X	16860396	16861523	1128	+	WBGene00020631	T20F7.3	protein_coding
X	2095701	2096904	1204	-	WBGene00020645	T21D9.2	protein_coding
X	3914765	3915848	1084	-	WBGene00020670	T22B2.6	protein_coding
X	6412875	6413488	614	+	WBGene00020690	T22E5.1	protein_coding
X	5511997	5512327	331	-	WBGene00020736	T23F2.3	protein_coding
X	5514727	5515084	358	-	WBGene00020737	T23F2.4	protein_coding
X	5516708	5517163	456	-	WBGene00020738	T23F2.5	protein_coding
X	2204045	2205063	1019	-	WBGene00020766	T24C12.4	protein_coding
X	2365666	2365990	325	-	WBGene00020769	T24D8.6	protein_coding
X	9040416	9041058	643	+	WBGene00020787	T25B6.1	protein_coding
X	9027604	9028285	682	+	WBGene00020789	T25B6.3	protein_coding
X	9015720	9016804	1085	+	WBGene00020790	T25B6.4	protein_coding
X	9021878	9022879	1002	-	WBGene00020792	T25B6.6	protein_coding
X	17237288	17237539	252	-	WBGene00020817	T25G12.11	protein_coding
X	1836337	1837368	1032	+	WBGene00020828	T26C11.2	protein_coding
X	3585957	3586592	636	+	WBGene00020844	T27A10.2	protein_coding
X	3572844	3573582	739	-	WBGene00020845	T27A10.5	protein_coding
X	6596425	6597121	697	-	WBGene00020886	ttr-6	protein_coding
X	6597900	6598832	933	-	WBGene00020887	hic-1	protein_coding
X	4218279	4218458	180	-	WBGene00020922	W01H2.2	protein_coding
X	1439267	1440261	995	-	WBGene00021046	sedl-1	protein_coding
X	7085367	7085639	273	+	WBGene00021150	Y1B5A.1	protein_coding
X	16883726	16884473	748	+	WBGene00021188	Y13C8A.1	protein_coding
X	5919397	5920495	1099	+	WBGene00021268	capa-1	protein_coding
X	5257299	5258384	1086	+	WBGene00021321	nspg-12	protein_coding
X	1990734	1991766	1033	+	WBGene00021484	Y40A1A.2	protein_coding
X	1997218	1998034	817	-	WBGene00021485	Y40A1A.3	protein_coding
X	17256200	17256787	588	-	WBGene00021500	Y40C7B.4	protein_coding
X	1943950	1945031	1082	-	WBGene00021988	rgs-8.2	protein_coding
X	5043976	5044746	771	+	WBGene00022024	Y64H9A.2	protein_coding
X	140442	141249	808	-	WBGene00022210	Y73B3A.8	protein_coding
X	148124	149166	1043	+	WBGene00022213	Y73B3A.11	protein_coding
X	214580	215588	1009	-	WBGene00022224	set-28	protein_coding
X	1742830	1743681	852	+	WBGene00022291	Y75D11A.2	protein_coding
X	1745096	1746217	1122	-	WBGene00022292	Y75D11A.3	protein_coding
X	9184136	9184646	511	+	WBGene00022316	Y81B9A.2	protein_coding
X	9182440	9182841	402	+	WBGene00022317	Y81B9A.3	protein_coding
X	2030960	2031588	629	-	WBGene00022415	Y102A11A.5	protein_coding
X	272930	274012	1083	-	WBGene00022433	Y108F1.5	protein_coding
X	1923723	1924238	516	-	WBGene00022509	ZC53.2	protein_coding
X	7779577	7780607	1031	+	WBGene00022665	ZK154.1	protein_coding
X	1651419	1651994	576	-	WBGene00022724	ZK380.4	protein_coding
X	1404271	1404997	727	+	WBGene00022728	ZK402.1	protein_coding
X	1403744	1404117	374	+	WBGene00022729	ZK402.2	protein_coding
X	4139516	4139767	252	-	WBGene00022746	ZK470.4	protein_coding
X	3446311	3446935	625	+	WBGene00022820	ZK813.1	protein_coding
X	3443826	3444191	366	+	WBGene00022821	ZK813.2	protein_coding
X	3441839	3442458	620	+	WBGene00022822	ZK813.3	protein_coding
X	3348391	3348640	250	+	WBGene00022826	ZK816.3	protein_coding
X	322523	323225	703	+	WBGene00023458	M02E1.3	protein_coding
X	4491629	4492208	580	-	WBGene00023460	F46H6.5	protein_coding
X	8534672	8535106	435	-	WBGene00023477	nspc-1	protein_coding
X	12425730	12426630	901	+	WBGene00023492	T24D3.2	protein_coding
X	12356194	12356681	488	-	WBGene00023493	nspc-12	protein_coding
X	11739050	11739154	105	+	WBGene00043187	nspa-9	protein_coding
X	1664855	1665025	171	-	WBGene00043469	R09H3.2	protein_coding
X	236067	236810	744	-	WBGene00043989	AC8.11	protein_coding
X	11696996	11698065	1070	+	WBGene00044133	C44C10.12	protein_coding
X	14133801	14134344	544	-	WBGene00044137	F28H6.8	protein_coding
X	14807236	14808151	916	+	WBGene00044139	F42D1.4	protein_coding
X	12347029	12347899	871	+	WBGene00044140	F42F12.11	protein_coding
X	15052685	15052870	186	+	WBGene00044141	H03G16.6	protein_coding
X	14469584	14470170	587	+	WBGene00044145	M163.9	protein_coding
X	14470987	14471772	786	+	WBGene00044146	M163.10	protein_coding
X	14479378	14480256	879	+	WBGene00044147	M163.11	protein_coding
X	12603622	12604060	439	+	WBGene00044149	T24D5.6	protein_coding
X	11076060	11076801	742	-	WBGene00044151	W04G3.12	protein_coding
X	11077667	11078250	584	-	WBGene00044152	W04G3.10	protein_coding
X	14454689	14455519	831	-	WBGene00044156	Y66C5A.1	protein_coding
X	11490130	11490494	365	+	WBGene00044284	spp-21	protein_coding
X	5106159	5107042	884	-	WBGene00044299	C42D8.9	protein_coding
X	8535469	8535819	351	+	WBGene00044337	nspc-2	protein_coding
X	8537091	8537523	433	+	WBGene00044338	nspc-3	protein_coding
X	8537956	8538362	407	-	WBGene00044339	nspc-4	protein_coding
X	8538726	8539097	372	+	WBGene00044340	nspc-5	protein_coding
X	8541146	8541496	351	-	WBGene00044357	nspc-6	protein_coding
X	7321903	7322423	521	-	WBGene00044442	T08A9.13	protein_coding
X	1381375	1381665	291	-	WBGene00044558	F56C3.10	protein_coding
X	1690039	1690994	956	-	WBGene00044560	C36C9.6	protein_coding
X	1748403	1748576	174	-	WBGene00044561	Y75D11A.6	protein_coding
X	1816406	1816762	357	+	WBGene00044562	C14E2.7	protein_coding
X	2131686	2131844	159	-	WBGene00044565	F53B1.9	protein_coding
X	4866098	4866690	593	+	WBGene00044568	ntc-1	protein_coding
X	7177641	7177942	302	+	WBGene00044577	F43E12.1	protein_coding
X	8610906	8611349	444	+	WBGene00044578	K01A12.4	protein_coding
X	8861258	8861705	448	+	WBGene00044579	C06E2.9	protein_coding
X	9009759	9010518	760	-	WBGene00044580	C24A3.9	protein_coding
X	9180185	9180923	739	-	WBGene00044581	Y81B9A.4	protein_coding
X	16213373	16213576	204	+	WBGene00044638	F23A7.8	protein_coding
X	17438686	17439751	1066	+	WBGene00044683	C36E6.8	protein_coding
X	10087314	10087966	653	-	WBGene00044686	flp-28	protein_coding
X	9168539	9169096	558	+	WBGene00044687	B0563.9	protein_coding
X	4101687	4102125	439	-	WBGene00044724	R02E4.3	protein_coding
X	3656272	3657266	995	+	WBGene00044725	R11G1.7	protein_coding
X	17081179	17082042	864	+	WBGene00044773	C08A9.10	protein_coding
X	2945803	2946558	756	-	WBGene00044901	Y41G9A.10	protein_coding
X	13139793	13140886	1094	+	WBGene00045245	ttr-34	protein_coding
X	11847856	11848718	863	-	WBGene00045251	F54F7.9	protein_coding
X	11419108	11420074	967	-	WBGene00045253	F46C3.6	protein_coding
X	9310625	9311325	701	-	WBGene00045261	H29C22.1	protein_coding
X	6436440	6437645	1206	-	WBGene00045265	K10C2.8	protein_coding
X	2577742	2578262	521	+	WBGene00045268	ttr-42	protein_coding
X	5786493	5787353	861	+	WBGene00045269	F46G11.6	protein_coding
X	16602473	16602622	150	-	WBGene00045272	F59C12.4	protein_coding
X	3444814	3445197	384	+	WBGene00045394	ZK813.7	protein_coding
X	14743670	14743780	111	-	WBGene00050939	C05G5.7	protein_coding
X	6176129	6177192	1064	+	WBGene00077592	T25B2.3	protein_coding
X	9166823	9167245	423	-	WBGene00077673	B0563.10	protein_coding
X	8218384	8218753	370	-	WBGene00077674	K02A6.4	protein_coding
X	14256273	14257424	1152	+	WBGene00077757	E02H4.7	protein_coding
X	9869822	9870801	980	+	WBGene00138711	R07B1.13	protein_coding
X	10967302	10967798	497	-	WBGene00164969	K09C8.9	protein_coding
X	10882284	10883163	880	+	WBGene00164971	T21E8.6	protein_coding
X	10476873	10477891	1019	+	WBGene00164973	C39B10.7	protein_coding
X	11440040	11440652	613	+	WBGene00164974	F46C3.7	protein_coding
X	2381582	2382335	754	+	WBGene00194641	F47G3.4	protein_coding
X	11280615	11281248	634	-	WBGene00194663	F38B2.6	protein_coding
X	8108221	8109245	1025	+	WBGene00194670	K07E3.9	protein_coding
X	14423871	14424751	881	-	WBGene00194674	F23D12.11	protein_coding
X	1852838	1853849	1012	-	WBGene00194679	T26C11.9	protein_coding
X	553171	553975	805	-	WBGene00194687	F57C12.6	protein_coding
X	11079246	11079767	522	-	WBGene00194793	W04G3.13	protein_coding
X	14966061	14966821	761	+	WBGene00194794	F45B8.5	protein_coding
X	12348629	12349196	568	+	WBGene00194795	F42F12.14	protein_coding
X	15596182	15597177	996	-	WBGene00194849	K09A9.8	protein_coding
X	14262802	14263573	772	-	WBGene00194907	E02H4.8	protein_coding
X	6178244	6178547	304	+	WBGene00194983	T25B2.4	protein_coding
X	9674309	9674899	591	-	WBGene00195084	C43C3.4	protein_coding
X	6190255	6191219	965	+	WBGene00195168	T13C5.9	protein_coding
X	389516	390569	1054	-	WBGene00195183	R04A9.9	protein_coding
X	1419213	1420124	912	+	WBGene00195185	F19G12.9	protein_coding
X	1426337	1426525	189	-	WBGene00195188	F19G12.11	protein_coding
X	9536661	9536765	105	-	WBGene00195209	C07B5.8	protein_coding
X	15773858	15774185	328	+	WBGene00195210	Y7A5A.13	protein_coding
X	12977244	12977551	308	-	WBGene00195213	F11C1.9	protein_coding
X	11938130	11938926	797	-	WBGene00195215	F55G7.5	protein_coding
X	9172578	9173318	741	+	WBGene00206365	B0563.18	protein_coding
X	7191373	7191982	610	-	WBGene00206379	C55B6.7	protein_coding
X	2565358	2566078	721	+	WBGene00206381	F52H2.15	protein_coding
X	1485906	1486185	280	-	WBGene00206384	D1005.10	protein_coding
X	6420070	6420781	712	-	WBGene00206386	K10C2.12	protein_coding
X	6439645	6440564	920	-	WBGene00206388	K10C2.14	protein_coding
X	13430345	13431488	1144	-	WBGene00206389	C29F7.10	protein_coding
X	11957546	11958622	1077	+	WBGene00206466	T08D10.5	protein_coding
X	7656401	7656975	575	-	WBGene00206475	F27D9.12	protein_coding
X	640684	641540	857	-	WBGene00206478	M6.11	protein_coding
X	9282033	9283126	1094	-	WBGene00206483	B0416.11	protein_coding
X	5148218	5148912	695	+	WBGene00206484	C31H2.14	protein_coding
X	16055545	16056410	866	+	WBGene00206527	T27A8.7	protein_coding
X	11699483	11700363	881	-	WBGene00219301	C44C10.15	protein_coding
X	15828359	15829355	997	+	WBGene00219351	Y7A5A.20	protein_coding
X	4362762	4363300	539	-	WBGene00219368	F14H12.17	protein_coding
X	4367026	4367514	489	-	WBGene00219369	R160.10	protein_coding
X	8521914	8522901	988	+	WBGene00219371	C03G5.14	protein_coding
X	16687681	16688045	365	-	WBGene00255607	F22H10.11	protein_coding
X	11961403	11962036	634	+	WBGene00268215	C49F5.13	protein_coding
X	11850872	11851735	864	+	WBGene00269392	F54F7.14	protein_coding
X	12123452	12123916	465	+	WBGene00269422	T01H10.11	protein_coding
X	11267011	11267298	288	+	WBGene00284849	C03A3.9	protein_coding
X	14015362	14015466	105	-	WBGene00284855	C04C11.25	protein_coding
X	5659967	5660023	57	+	WBGene00284867	T22B7.22	protein_coding
X	15076694	15077744	1051	-	WBGene00303024	H40L08.7	protein_coding
X	15537665	15537700	36	+	WBGene00303034	C02C6.14	protein_coding
X	991339	991374	36	-	WBGene00303038	C09E10.3	protein_coding
X	8018027	8018098	72	+	WBGene00303044	C34D10.5	protein_coding
X	2409607	2409642	36	+	WBGene00303045	C43H6.12	protein_coding
X	13376911	13376949	39	-	WBGene00303047	C49F8.14	protein_coding
X	6996519	6996548	30	-	WBGene00303051	F01E11.20	protein_coding
X	11385054	11385083	30	+	WBGene00303052	F08B12.11	protein_coding
X	7573590	7573628	39	-	WBGene00303053	F08C6.18	protein_coding
X	16963921	16963950	30	+	WBGene00303060	F52G3.7	protein_coding
X	1017527	1017556	30	-	WBGene00303062	F55A4.13	protein_coding
X	15213200	15213232	33	-	WBGene00303065	H03A11.13	protein_coding
X	15077601	15077633	33	-	WBGene00303066	H40L08.8	protein_coding
X	2594039	2594068	30	+	WBGene00303074	T03G6.7	protein_coding
X	14810643	14810804	162	-	WBGene00303075	T04C10.11	protein_coding
X	5492915	5493911	997	+	WBGene00303081	T23F2.13	protein_coding
X	3465856	3465885	30	-	WBGene00303098	ZK377.15	protein_coding
X	4217087	4217196	110	-	WBGene00303101	F20B6.10	protein_coding
X	3942267	3942367	101	-	WBGene00303102	T19D2.13	protein_coding
X	14178988	14180086	1099	+	WBGene00304175	C37E2.10	protein_coding
X	14466832	14467615	784	+	WBGene00304194	M163.21	protein_coding
X	14465893	14466374	482	+	WBGene00304195	M163.22	protein_coding
X	12308449	12309548	1100	+	WBGene00304215	F17A2.16	protein_coding
X	17566648	17567478	831	-	WBGene00304237	F39B3.7	protein_coding
X	13990640	13990780	141	-	WBGene00304783	C31E10.11	protein_coding
X	1687379	1688327	949	+	WBGene00304785	C36C9.11	protein_coding
X	1689143	1690096	954	-	WBGene00304786	C36C9.12	protein_coding
X	1921572	1922394	823	-	WBGene00304790	ZC53.22	protein_coding
X	15055301	15056014	714	-	WBGene00304793	H03G16.7	protein_coding
X	15076067	15076480	414	-	WBGene00304794	H40L08.9	protein_coding
X	15919672	15920623	952	+	WBGene00304797	F31B9.7	protein_coding
X	16833682	16834791	1110	-	WBGene00304806	F41G4.13	protein_coding
X	1654446	1654526	81	+	WBGene00304812	ZK380.6	protein_coding
X	1736241	1736514	274	+	WBGene00304814	F07G6.12	protein_coding
X	3654923	3655501	579	+	WBGene00304816	R11G1.11	protein_coding
X	4377515	4377789	275	-	WBGene00304817	R160.12	protein_coding
X	4371796	4372088	293	-	WBGene00304818	R160.14	protein_coding
X	4371036	4371513	478	-	WBGene00304819	R160.13	protein_coding
X	12861895	12862846	952	-	WBGene00304822	T14G8.6	protein_coding
X	15781625	15782127	503	-	WBGene00304823	Y7A5A.24	protein_coding
X	1939013	1939987	975	-	WBGene00304826	Y59E1A.4	protein_coding
X	16952044	16952959	916	-	WBGene00304895	F52G3.8	protein_coding
X	3402001	3402728	728	+	WBGene00304901	C04F6.9	protein_coding
X	6373648	6374767	1120	+	WBGene00304907	C03B1.17	protein_coding
X	14966815	14967926	1112	+	WBGene00304908	F20D1.22	protein_coding
IV	15590697	15591772	1076	+	WBGene00000028	abu-5	protein_coding
IV	13368276	13369412	1137	-	WBGene00000093	agt-1	protein_coding
IV	9108931	9109753	823	+	WBGene00000120	aly-1	protein_coding
IV	9147468	9148579	1112	+	WBGene00000121	aly-2	protein_coding
IV	7634786	7635712	927	+	WBGene00000190	warf-1	protein_coding
IV	14798149	14799227	1079	+	WBGene00000192	arl-8	protein_coding
IV	6377065	6378168	1104	+	WBGene00000256	bli-6	protein_coding
IV	9772510	9773559	1050	+	WBGene00000301	cav-1	protein_coding
IV	7547118	7547893	776	-	WBGene00000392	cdd-2	protein_coding
IV	6092603	6093680	1078	-	WBGene00000535	cpi-1	protein_coding
IV	10084439	10085451	1013	-	WBGene00000593	col-2	protein_coding
IV	4243545	4244610	1066	-	WBGene00000611	col-34	protein_coding
IV	1459896	1460786	891	-	WBGene00000680	col-106	protein_coding
IV	1548721	1549714	994	+	WBGene00000681	col-107	protein_coding
IV	1768588	1769702	1115	+	WBGene00000682	col-108	protein_coding
IV	7245460	7246653	1194	-	WBGene00000688	col-114	protein_coding
IV	8978926	8979795	870	-	WBGene00000693	col-119	protein_coding
IV	9260610	9261787	1178	-	WBGene00000694	col-120	protein_coding
IV	9563379	9564441	1063	+	WBGene00000696	col-122	protein_coding
IV	10216451	10217617	1167	+	WBGene00000698	col-124	protein_coding
IV	11225506	11226516	1011	+	WBGene00000699	col-125	protein_coding
IV	11263401	11264397	997	+	WBGene00000700	col-126	protein_coding
IV	12427505	12428516	1012	-	WBGene00000704	col-130	protein_coding
IV	14098325	14099356	1032	-	WBGene00000707	col-133	protein_coding
IV	17182884	17183729	846	-	WBGene00000711	col-138	protein_coding
IV	7132132	7133217	1086	-	WBGene00000888	cyn-12	protein_coding
IV	8513919	8514725	807	+	WBGene00001051	cks-1	protein_coding
IV	4235614	4236710	1097	+	WBGene00001074	dpy-13	protein_coding
IV	1207218	1208080	863	-	WBGene00001103	dsl-1	protein_coding
IV	13328359	13329314	956	+	WBGene00001390	far-6	protein_coding
IV	11036582	11037174	593	+	WBGene00001426	fkb-1	protein_coding
IV	7868907	7870081	1175	+	WBGene00001453	flp-10	protein_coding
IV	11521290	11522214	925	+	WBGene00001585	gfl-1	protein_coding
IV	3439655	3440453	799	+	WBGene00001692	grd-3	protein_coding
IV	3441055	3441841	787	+	WBGene00001699	grd-10	protein_coding
IV	3438312	3439507	1196	+	WBGene00001702	grd-13	protein_coding
IV	7309838	7310760	923	-	WBGene00001713	grl-4	protein_coding
IV	251908	252554	647	-	WBGene00001728	grl-19	protein_coding
IV	10737474	10738191	718	+	WBGene00001730	grl-21	protein_coding
IV	17475315	17475843	529	-	WBGene00001733	grl-24	protein_coding
IV	10139380	10140243	864	-	WBGene00001751	gst-3	protein_coding
IV	10142225	10143099	875	+	WBGene00001752	gst-4	protein_coding
IV	6294240	6295217	978	+	WBGene00001853	hil-2	protein_coding
IV	6646312	6646972	661	+	WBGene00001858	hil-7	protein_coding
IV	8331044	8331412	369	-	WBGene00001903	his-29	protein_coding
IV	8331666	8332049	384	+	WBGene00001904	his-30	protein_coding
IV	8333672	8333983	312	-	WBGene00001905	his-31	protein_coding
IV	8334305	8334715	411	+	WBGene00001906	his-32	protein_coding
IV	8335335	8335718	384	-	WBGene00001907	his-33	protein_coding
IV	8335972	8336340	369	+	WBGene00001908	his-34	protein_coding
IV	11326588	11326998	411	+	WBGene00001919	his-45	protein_coding
IV	11326018	11326329	312	-	WBGene00001920	his-46	protein_coding
IV	11324056	11324439	384	-	WBGene00001921	his-47	protein_coding
IV	11324745	11325116	372	+	WBGene00001922	his-48	protein_coding
IV	11337853	11338263	411	-	WBGene00001929	his-55	protein_coding
IV	11338522	11338833	312	+	WBGene00001930	his-56	protein_coding
IV	11339735	11340106	372	-	WBGene00001932	his-58	protein_coding
[truncated: 3,001 more rows]

## Sheet: Quantile_2
Chromosome	start	end	Length	strand	Gene_ID	Gene_Name	gene_biotype
V	9244402	9246360	1959	-	WBGene00000003	aat-2	protein_coding
V	10380340	10381826	1487	-	WBGene00000024	abu-1	protein_coding
V	5160678	5161892	1215	-	WBGene00000029	abu-6	protein_coding
V	5163270	5164782	1513	-	WBGene00000030	abu-7	protein_coding
V	5192995	5194608	1614	-	WBGene00000031	abu-8	protein_coding
V	11081052	11082415	1364	+	WBGene00000063	act-1	protein_coding
V	11076777	11078154	1378	-	WBGene00000064	act-2	protein_coding
V	14012333	14013644	1312	+	WBGene00000097	aip-1	protein_coding
V	10491743	10493256	1514	+	WBGene00000173	aqp-5	protein_coding
V	9203077	9204734	1658	+	WBGene00000215	asp-2	protein_coding
V	8272385	8274044	1660	+	WBGene00000218	asp-5	protein_coding
V	8267511	8268937	1427	-	WBGene00000219	asp-6	protein_coding
V	10564880	10566464	1585	+	WBGene00000298	cat-4	protein_coding
V	15921309	15922820	1512	+	WBGene00000412	cdr-1	protein_coding
V	5323194	5324666	1473	-	WBGene00000454	ceh-33	protein_coding
V	6044062	6045664	1603	+	WBGene00000534	cpi-2	protein_coding
V	1156271	1158189	1919	+	WBGene00000552	cmd-1	protein_coding
V	10423898	10425198	1301	-	WBGene00000601	col-12	protein_coding
V	9632029	9633338	1310	-	WBGene00000720	col-147	protein_coding
V	10393531	10395223	1693	-	WBGene00000724	col-151	protein_coding
V	10560921	10562252	1332	+	WBGene00000725	col-152	protein_coding
V	10949811	10951821	2011	+	WBGene00000726	col-153	protein_coding
V	11829582	11831219	1638	+	WBGene00000731	col-158	protein_coding
V	13441961	13443419	1459	+	WBGene00000735	col-162	protein_coding
V	15296834	15298700	1867	-	WBGene00000783	cpr-3	protein_coding
V	1132598	1134036	1439	-	WBGene00000785	cpr-5	protein_coding
V	13381189	13383077	1889	+	WBGene00000789	cpz-2	protein_coding
V	5594615	5595842	1228	+	WBGene00000795	crn-2	protein_coding
V	6098992	6100542	1551	-	WBGene00000802	crt-1	protein_coding
V	15395696	15397353	1658	+	WBGene00000868	cyb-3	protein_coding
V	19815133	19816454	1322	+	WBGene00000920	daf-28	protein_coding
V	2763981	2765200	1220	-	WBGene00000977	dhs-14	protein_coding
V	2768361	2769854	1494	-	WBGene00000978	dhs-15	protein_coding
V	5983745	5985509	1765	+	WBGene00000979	dhs-16	protein_coding
V	11489048	11490482	1435	-	WBGene00000982	dhs-19	protein_coding
V	12731767	12733645	1879	-	WBGene00000984	dhs-21	protein_coding
V	14420071	14421440	1370	-	WBGene00000985	dhs-22	protein_coding
V	5503033	5504857	1825	-	WBGene00001037	dnj-19	protein_coding
V	12993150	12994824	1675	+	WBGene00001109	dsl-7	protein_coding
V	12954002	12955229	1228	+	WBGene00001233	eif-3.K	protein_coding
V	13985128	13987074	1947	+	WBGene00001310	end-1	protein_coding
V	14014695	14015980	1286	+	WBGene00001311	end-3	protein_coding
V	12998427	12999659	1233	-	WBGene00001388	far-4	protein_coding
V	12995569	12996836	1268	+	WBGene00001389	far-5	protein_coding
V	17725004	17726818	1815	+	WBGene00001397	fat-5	protein_coding
V	7151353	7153146	1794	-	WBGene00001399	fat-7	protein_coding
V	15000651	15002223	1573	-	WBGene00001423	fib-1	protein_coding
V	12785153	12787126	1974	-	WBGene00001429	fkb-4	protein_coding
V	20846158	20847727	1570	+	WBGene00001431	fkb-6	protein_coding
V	9471975	9473792	1818	+	WBGene00001449	flp-6	protein_coding
V	11936505	11937810	1306	-	WBGene00001466	flr-2	protein_coding
V	20199254	20200648	1395	+	WBGene00001482	fog-2	protein_coding
V	6573939	6575890	1952	-	WBGene00001506	fut-2	protein_coding
V	12638666	12640484	1819	-	WBGene00001670	gpa-8	protein_coding
V	7842528	7844353	1826	+	WBGene00001697	grd-8	protein_coding
V	14978505	14980250	1746	+	WBGene00001701	grd-12	protein_coding
V	12945075	12946858	1784	+	WBGene00001711	grl-2	protein_coding
V	11411511	11412894	1384	+	WBGene00001712	grl-3	protein_coding
V	4412748	4414663	1916	-	WBGene00001714	grl-5	protein_coding
V	6731831	6733095	1265	-	WBGene00001717	grl-8	protein_coding
V	6730216	6731694	1479	-	WBGene00001718	grl-9	protein_coding
V	7774545	7775759	1215	+	WBGene00001719	grl-10	protein_coding
V	4362668	4364617	1950	-	WBGene00001722	grl-13	protein_coding
V	13561973	13563941	1969	-	WBGene00001726	grl-17	protein_coding
V	12575191	12576897	1707	-	WBGene00001732	grl-23	protein_coding
V	1730684	1732018	1335	-	WBGene00001769	gst-21	protein_coding
V	16231032	16232282	1251	-	WBGene00001770	gst-22	protein_coding
V	3243284	3244502	1219	+	WBGene00001771	gst-23	protein_coding
V	16390891	16392490	1600	+	WBGene00001792	gst-44	protein_coding
V	14525389	14527411	2023	+	WBGene00001834	hda-1	protein_coding
V	9280512	9282210	1699	-	WBGene00001954	hlh-10	protein_coding
V	11021069	11022937	1869	-	WBGene00001991	hot-6	protein_coding
V	6584	7828	1245	-	WBGene00002061	ife-3	protein_coding
V	3188343	3190115	1773	+	WBGene00002246	lag-2	protein_coding
V	12968855	12970730	1876	+	WBGene00003031	lin-46	protein_coding
V	10579305	10580693	1389	+	WBGene00003065	lpd-9	protein_coding
V	10282100	10283544	1445	-	WBGene00003092	lys-3	protein_coding
V	11976777	11978459	1683	-	WBGene00003235	mif-2	protein_coding
V	6502368	6504181	1814	-	WBGene00003385	moc-2	protein_coding
V	5658713	5660704	1992	-	WBGene00003507	mut-14	protein_coding
V	2466762	2468504	1743	+	WBGene00003521	nas-2	protein_coding
V	9478163	9479601	1439	+	WBGene00003522	nas-3	protein_coding
V	11398916	11400563	1648	+	WBGene00003536	nas-17	protein_coding
V	11396434	11397717	1284	+	WBGene00003537	nas-18	protein_coding
V	11401091	11402710	1620	-	WBGene00003538	nas-19	protein_coding
V	11470925	11472309	1385	-	WBGene00003539	nas-20	protein_coding
V	11472564	11473899	1336	+	WBGene00003540	nas-21	protein_coding
V	13769386	13771329	1944	+	WBGene00003543	nas-24	protein_coding
V	10082133	10084049	1917	-	WBGene00003611	nhr-12	protein_coding
V	2227203	2228986	1784	+	WBGene00003617	nhr-18	protein_coding
V	6998819	7000651	1833	+	WBGene00003632	nhr-42	protein_coding
V	15674007	15676003	1997	+	WBGene00003641	nhr-51	protein_coding
V	15700606	15702363	1758	-	WBGene00003643	nhr-53	protein_coding
V	16503944	16505928	1985	-	WBGene00003644	nhr-54	protein_coding
V	532259	534070	1812	+	WBGene00003648	nhr-58	protein_coding
V	610512	612513	2002	+	WBGene00003680	nhr-90	protein_coding
V	2233477	2235180	1704	+	WBGene00003686	nhr-96	protein_coding
V	2225430	2227070	1641	+	WBGene00003693	nhr-103	protein_coding
V	489620	491432	1813	+	WBGene00003696	nhr-106	protein_coding
V	6995214	6997091	1878	-	WBGene00003697	nhr-107	protein_coding
V	15922939	15924472	1534	-	WBGene00003698	nhr-108	protein_coding
V	16122895	16124839	1945	-	WBGene00003701	nhr-111	protein_coding
V	16722061	16723844	1784	-	WBGene00003702	nhr-112	protein_coding
V	2229081	2230984	1904	+	WBGene00003716	nhr-126	protein_coding
V	13329186	13331019	1834	-	WBGene00003719	nhr-129	protein_coding
V	534446	536247	1802	+	WBGene00003722	nhr-132	protein_coding
V	2210510	2212118	1609	-	WBGene00003723	nhr-133	protein_coding
V	4236418	4238056	1639	+	WBGene00003751	nlp-13	protein_coding
V	14416067	14417835	1769	-	WBGene00003835	nxf-2	protein_coding
V	6898540	6900223	1684	-	WBGene00003844	odc-1	protein_coding
V	14729643	14731120	1478	+	WBGene00003861	oig-3	protein_coding
V	8029439	8031214	1776	+	WBGene00003865	oma-2	protein_coding
V	14595314	14597034	1721	-	WBGene00003982	pes-9	protein_coding
V	6624701	6626344	1644	-	WBGene00004092	ppt-1	protein_coding
V	10382442	10384063	1622	+	WBGene00004098	pqn-2	protein_coding
V	5158602	5159907	1306	+	WBGene00004099	abu-15	protein_coding
V	9109581	9111013	1433	+	WBGene00004119	pqn-31	protein_coding
V	12063476	12065391	1916	-	WBGene00004138	pqn-53	protein_coding
V	1464990	1466360	1371	+	WBGene00004139	pqn-54	protein_coding
V	9616031	9617651	1621	+	WBGene00004146	pqn-63	protein_coding
V	15465677	15467100	1424	+	WBGene00004153	pqn-71	protein_coding
V	1262629	1263989	1361	-	WBGene00004266	rab-1	protein_coding
V	11980534	11982397	1864	-	WBGene00004501	rpt-1	protein_coding
V	6016059	6017669	1611	-	WBGene00004502	rpt-2	protein_coding
V	16121084	16122649	1566	+	WBGene00004809	skr-3	protein_coding
V	9775935	9777745	1811	-	WBGene00004882	smg-4	protein_coding
V	12344188	12345908	1721	-	WBGene00004898	snb-2	protein_coding
V	11978508	11979723	1216	-	WBGene00004917	snr-4	protein_coding
V	10384250	10385740	1491	+	WBGene00004964	spe-10	protein_coding
V	6783187	6784903	1717	-	WBGene00004984	spn-4	protein_coding
V	6560173	6561692	1520	-	WBGene00005004	spp-19	protein_coding
V	12352745	12354320	1576	+	WBGene00005018	sqt-3	protein_coding
V	10659635	10661467	1833	-	WBGene00005022	sqv-4	protein_coding
V	12184949	12186352	1404	+	WBGene00005082	srd-4	protein_coding
V	5351783	5353067	1285	+	WBGene00005087	srd-9	protein_coding
V	5904917	5906352	1436	-	WBGene00005093	srd-15	protein_coding
V	5898538	5900040	1503	-	WBGene00005094	srd-16	protein_coding
V	13425548	13426864	1317	-	WBGene00005096	srd-18	protein_coding
V	16629900	16631155	1256	+	WBGene00005099	srd-21	protein_coding
V	14161459	14163009	1551	-	WBGene00005104	srd-26	protein_coding
V	7629804	7631298	1495	+	WBGene00005108	srd-30	protein_coding
V	7633399	7634757	1359	-	WBGene00005109	srd-31	protein_coding
V	4872292	4874276	1985	+	WBGene00005111	srd-33	protein_coding
V	10547598	10549081	1484	-	WBGene00005112	srd-34	protein_coding
V	12964376	12966001	1626	+	WBGene00005113	srd-35	protein_coding
V	10094674	10096402	1729	+	WBGene00005127	srd-49	protein_coding
V	16392482	16393828	1347	-	WBGene00005140	srd-63	protein_coding
V	16901215	16902826	1612	-	WBGene00005145	srd-68	protein_coding
V	5331267	5333055	1789	+	WBGene00005183	srg-26	protein_coding
V	5339797	5341475	1679	+	WBGene00005184	srg-27	protein_coding
V	5334888	5336329	1442	+	WBGene00005185	srg-28	protein_coding
V	5337184	5339013	1830	+	WBGene00005186	srg-29	protein_coding
V	6716805	6718332	1528	-	WBGene00005187	srg-30	protein_coding
V	10587066	10588794	1729	-	WBGene00005189	srg-32	protein_coding
V	8292064	8293516	1453	+	WBGene00005190	srg-33	protein_coding
V	11163206	11164575	1370	-	WBGene00005197	srg-40	protein_coding
V	11160452	11161891	1440	-	WBGene00005198	srg-41	protein_coding
V	17328797	17330731	1935	+	WBGene00005201	srg-44	protein_coding
V	14554980	14556287	1308	-	WBGene00005204	srg-47	protein_coding
V	14926663	14928348	1686	-	WBGene00005212	srg-55	protein_coding
V	2758174	2759556	1383	-	WBGene00005215	srg-58	protein_coding
V	2721290	2722655	1366	-	WBGene00005217	srg-60	protein_coding
V	2738721	2740328	1608	-	WBGene00005218	srg-61	protein_coding
V	2740444	2742398	1955	-	WBGene00005219	srg-62	protein_coding
V	5483010	5484966	1957	-	WBGene00005222	srg-65	protein_coding
V	5480750	5482415	1666	-	WBGene00005223	srg-66	protein_coding
V	5461528	5462994	1467	-	WBGene00005224	srg-67	protein_coding
V	5463791	5465435	1645	-	WBGene00005225	srg-68	protein_coding
V	11485858	11487266	1409	+	WBGene00005227	srh-1	protein_coding
V	4010470	4011966	1497	+	WBGene00005230	srh-4	protein_coding
V	1685628	1686864	1237	+	WBGene00005231	srh-5	protein_coding
V	4008227	4009818	1592	+	WBGene00005233	srh-7	protein_coding
V	6065507	6067140	1634	-	WBGene00005236	srh-10	protein_coding
V	13320976	13322381	1406	+	WBGene00005240	srh-15	protein_coding
V	14661305	14663154	1850	+	WBGene00005242	srh-17	protein_coding
V	13318452	13320225	1774	+	WBGene00005243	srh-18	protein_coding
V	4924918	4926215	1298	+	WBGene00005245	srh-20	protein_coding
V	4926671	4928257	1587	+	WBGene00005246	srh-21	protein_coding
V	4921102	4922616	1515	+	WBGene00005248	srh-23	protein_coding
V	12432365	12433817	1453	-	WBGene00005249	srh-25	protein_coding
V	6774261	6775808	1548	-	WBGene00005251	srh-28	protein_coding
V	441820	443293	1474	-	WBGene00005256	srh-33	protein_coding
V	444893	446674	1782	-	WBGene00005257	srh-34	protein_coding
V	447531	449230	1700	-	WBGene00005258	srh-35	protein_coding
V	511194	512520	1327	-	WBGene00005260	srh-37	protein_coding
V	11303651	11304979	1329	-	WBGene00005268	srh-45	protein_coding
V	11301561	11302886	1326	-	WBGene00005269	srh-46	protein_coding
V	11299373	11300639	1267	-	WBGene00005270	srh-47	protein_coding
V	15374900	15376323	1424	-	WBGene00005275	srh-52	protein_coding
V	15153577	15154994	1418	+	WBGene00005278	srh-55	protein_coding
V	2771860	2773519	1660	+	WBGene00005279	srh-56	protein_coding
V	401688	403128	1441	-	WBGene00005284	srh-62	protein_coding
V	11047220	11048778	1559	-	WBGene00005295	srh-74	protein_coding
V	11055294	11057143	1850	-	WBGene00005296	srh-75	protein_coding
V	5833831	5835183	1353	+	WBGene00005297	srh-76	protein_coding
V	7497740	7499128	1389	+	WBGene00005300	srh-79	protein_coding
V	145094	146952	1859	+	WBGene00005303	srh-82	protein_coding
V	7164510	7165895	1386	+	WBGene00005304	srh-83	protein_coding
V	2986192	2987507	1316	-	WBGene00005306	srh-85	protein_coding
V	2944377	2945702	1326	-	WBGene00005308	srh-87	protein_coding
V	2963566	2964886	1321	-	WBGene00005309	srh-88	protein_coding
V	7463453	7464796	1344	-	WBGene00005310	srh-89	protein_coding
V	7459604	7460998	1395	-	WBGene00005313	srh-92	protein_coding
V	16246879	16248542	1664	+	WBGene00005315	srh-95	protein_coding
V	16242818	16244178	1361	-	WBGene00005323	srh-104	protein_coding
V	17255754	17257194	1441	+	WBGene00005334	srh-115	protein_coding
V	17494306	17496171	1866	-	WBGene00005337	srh-118	protein_coding
V	16972434	16974088	1655	+	WBGene00005338	srh-119	protein_coding
V	15376501	15378003	1503	-	WBGene00005340	srh-122	protein_coding
V	17473999	17475471	1473	+	WBGene00005341	srh-123	protein_coding
V	7475626	7476866	1241	-	WBGene00005342	srh-125	protein_coding
V	5142262	5143885	1624	-	WBGene00005346	srh-129	protein_coding
V	5151180	5153067	1888	+	WBGene00005347	srh-130	protein_coding
V	17005489	17006753	1265	+	WBGene00005348	srh-131	protein_coding
V	17410255	17411705	1451	+	WBGene00005349	srh-132	protein_coding
V	18012413	18014216	1804	-	WBGene00005350	srh-133	protein_coding
V	16495957	16497596	1640	-	WBGene00005353	srh-136	protein_coding
V	16469367	16471016	1650	-	WBGene00005355	srh-138	protein_coding
V	16483981	16485382	1402	+	WBGene00005356	srh-139	protein_coding
V	15722188	15723999	1812	+	WBGene00005357	srh-140	protein_coding
V	16443926	16445734	1809	+	WBGene00005358	srh-141	protein_coding
V	16459336	16460966	1631	-	WBGene00005359	srh-142	protein_coding
V	2914248	2916172	1925	+	WBGene00005362	srh-146	protein_coding
V	15856754	15858392	1639	-	WBGene00005364	srh-148	protein_coding
V	15839964	15841195	1232	-	WBGene00005365	srh-149	protein_coding
V	17182345	17183870	1526	+	WBGene00005375	srh-159	protein_coding
V	16333712	16335063	1352	+	WBGene00005383	srh-167	protein_coding
V	4047841	4049354	1514	+	WBGene00005385	srh-169	protein_coding
V	19959044	19960916	1873	+	WBGene00005388	srh-172	protein_coding
V	19973284	19975146	1863	+	WBGene00005389	srh-173	protein_coding
V	17178757	17180002	1246	+	WBGene00005390	srh-174	protein_coding
V	20367480	20369253	1774	-	WBGene00005392	srh-177	protein_coding
V	18478417	18480331	1915	-	WBGene00005393	srh-178	protein_coding
V	18476390	18478061	1672	+	WBGene00005394	srh-179	protein_coding
V	16317544	16318816	1273	+	WBGene00005395	srh-180	protein_coding
V	18474523	18476268	1746	+	WBGene00005396	srh-181	protein_coding
V	18471985	18473515	1531	-	WBGene00005397	srh-182	protein_coding
V	10796799	10798190	1392	-	WBGene00005399	srh-184	protein_coding
V	3066228	3067549	1322	+	WBGene00005400	srh-185	protein_coding
V	15955797	15957028	1232	+	WBGene00005401	srh-186	protein_coding
V	7338593	7339931	1339	-	WBGene00005402	srh-187	protein_coding
V	3903107	3904545	1439	+	WBGene00005404	srh-190	protein_coding
V	4288412	4290193	1782	-	WBGene00005406	srh-193	protein_coding
V	4291836	4293525	1690	-	WBGene00005407	srh-194	protein_coding
V	1750001	1751549	1549	-	WBGene00005410	srh-199	protein_coding
V	7652338	7653667	1330	-	WBGene00005411	srh-200	protein_coding
V	9012199	9013865	1667	-	WBGene00005412	srh-201	protein_coding
V	17454495	17456297	1803	-	WBGene00005414	srh-203	protein_coding
V	4239150	4240392	1243	-	WBGene00005415	srh-204	protein_coding
V	19317358	19319367	2010	+	WBGene00005418	srh-208	protein_coding
V	3595148	3597152	2005	-	WBGene00005422	srh-212	protein_coding
V	16828235	16829755	1521	-	WBGene00005424	srh-214	protein_coding
V	16830557	16832021	1465	-	WBGene00005425	srh-215	protein_coding
V	15493980	15495761	1782	+	WBGene00005428	srh-218	protein_coding
V	7502840	7504371	1532	-	WBGene00005437	srh-229	protein_coding
V	7350881	7352236	1356	-	WBGene00005439	srh-231	protein_coding
V	7650242	7651857	1616	-	WBGene00005441	srh-234	protein_coding
V	17470223	17471664	1442	-	WBGene00005442	srh-235	protein_coding
V	17210716	17212039	1324	-	WBGene00005443	srh-236	protein_coding
V	17090379	17091714	1336	+	WBGene00005444	srh-237	protein_coding
V	15445737	15447381	1645	+	WBGene00005446	srh-239	protein_coding
V	2867792	2869603	1812	-	WBGene00005448	srh-241	protein_coding
V	2870427	2872106	1680	+	WBGene00005449	srh-243	protein_coding
V	7343822	7345256	1435	+	WBGene00005450	srh-244	protein_coding
V	656499	657778	1280	-	WBGene00005452	srh-246	protein_coding
V	15378367	15379917	1551	-	WBGene00005457	srh-251	protein_coding
V	17064976	17066471	1496	+	WBGene00005461	srh-255	protein_coding
V	15405159	15406760	1602	+	WBGene00005464	srh-258	protein_coding
V	15416251	15417616	1366	+	WBGene00005471	srh-265	protein_coding
V	7539315	7540891	1577	+	WBGene00005474	srh-268	protein_coding
V	16590156	16592042	1887	-	WBGene00005475	srh-269	protein_coding
V	2860130	2861605	1476	-	WBGene00005476	srh-270	protein_coding
V	2863333	2865001	1669	+	WBGene00005478	srh-272	protein_coding
V	7353003	7354254	1252	+	WBGene00005480	srh-275	protein_coding
V	15529369	15530784	1416	+	WBGene00005481	srh-276	protein_coding
V	16190785	16192262	1478	+	WBGene00005486	srh-281	protein_coding
V	17765348	17766807	1460	+	WBGene00005488	srh-283	protein_coding
V	17792679	17794086	1408	-	WBGene00005493	srh-289	protein_coding
V	17790491	17792470	1980	+	WBGene00005494	srh-290	protein_coding
V	17822105	17823889	1785	+	WBGene00005504	srh-300	protein_coding
V	17831650	17833581	1932	+	WBGene00005507	srh-303	protein_coding
V	17828610	17829983	1374	+	WBGene00005508	srh-304	protein_coding
V	15966153	15967642	1490	-	WBGene00005513	sri-1	protein_coding
V	15963792	15965214	1423	-	WBGene00005514	sri-2	protein_coding
V	13185684	13187428	1745	+	WBGene00005518	sri-6	protein_coding
V	15400327	15401820	1494	+	WBGene00005519	sri-7	protein_coding
V	10368556	10369922	1367	+	WBGene00005532	sri-20	protein_coding
V	3549853	3551306	1454	+	WBGene00005533	sri-21	protein_coding
V	15212169	15213706	1538	+	WBGene00005536	sri-24	protein_coding
V	15215475	15217007	1533	+	WBGene00005538	sri-26	protein_coding
V	1725653	1727632	1980	+	WBGene00005539	sri-27	protein_coding
V	16386662	16388368	1707	-	WBGene00005577	sri-65	protein_coding
V	17060287	17061675	1389	+	WBGene00005578	sri-66	protein_coding
V	17303054	17304438	1385	+	WBGene00005582	sri-70	protein_coding
V	566719	568205	1487	-	WBGene00005584	sri-72	protein_coding
V	564391	566084	1694	-	WBGene00005585	sri-73	protein_coding
V	12163206	12164535	1330	+	WBGene00005592	srj-4	protein_coding
V	3245003	3246722	1720	+	WBGene00005595	srj-7	protein_coding
V	3247815	3249140	1326	+	WBGene00005596	srj-8	protein_coding
V	3431940	3433751	1812	+	WBGene00005597	srj-9	protein_coding
V	7402655	7403910	1256	+	WBGene00005601	srj-13	protein_coding
V	2774342	2776258	1917	+	WBGene00005606	srj-18	protein_coding
V	2568876	2570743	1868	-	WBGene00005607	srj-19	protein_coding
V	2571527	2573208	1682	-	WBGene00005608	srj-20	protein_coding
V	10742423	10743749	1327	-	WBGene00005610	srj-22	protein_coding
V	734420	736271	1852	-	WBGene00005613	srj-25	protein_coding
V	15126212	15127513	1302	-	WBGene00005615	srj-27	protein_coding
V	16075659	16077308	1650	+	WBGene00005616	srj-29	protein_coding
V	7296149	7297363	1215	-	WBGene00005617	srj-32	protein_coding
V	9935548	9937535	1988	-	WBGene00005618	srj-33	protein_coding
V	638628	639928	1301	+	WBGene00005621	srj-37	protein_coding
V	4104598	4106244	1647	+	WBGene00005623	srj-39	protein_coding
V	2844563	2845871	1309	-	WBGene00005626	srj-44	protein_coding
V	2835312	2836601	1290	-	WBGene00005627	srj-45	protein_coding
V	2832966	2834921	1956	+	WBGene00005629	srj-50	protein_coding
V	2856082	2857942	1861	-	WBGene00005634	srj-55	protein_coding
V	6284833	6286443	1611	-	WBGene00005640	srn-1	protein_coding
V	753283	755124	1842	+	WBGene00005642	srp-1	protein_coding
V	762640	764596	1957	+	WBGene00005643	srp-2	protein_coding
V	1908842	1910692	1851	+	WBGene00005644	srp-3	protein_coding
V	7384232	7386102	1871	-	WBGene00005647	srp-6	protein_coding
V	16506894	16508767	1874	-	WBGene00005654	srr-3	protein_coding
V	15128255	15129986	1732	+	WBGene00005658	srr-7	protein_coding
V	5001686	5003345	1660	+	WBGene00005659	srr-8	protein_coding
V	7738010	7739596	1587	+	WBGene00005660	srr-9	protein_coding
V	7735619	7737024	1406	+	WBGene00005661	srr-10	protein_coding
V	15972963	15974936	1974	-	WBGene00005685	sru-22	protein_coding
V	1499440	1500677	1238	+	WBGene00005690	sru-27	protein_coding
V	1506295	1508096	1802	+	WBGene00005691	sru-28	protein_coding
V	9811454	9812803	1350	+	WBGene00005692	sru-29	protein_coding
V	9841676	9843179	1504	+	WBGene00005699	sru-36	protein_coding
V	9834463	9836045	1583	-	WBGene00005701	sru-38	protein_coding
V	9832646	9834000	1355	-	WBGene00005703	sru-40	protein_coding
V	15650467	15652413	1947	+	WBGene00005705	sru-42	protein_coding
V	16466271	16467940	1670	-	WBGene00005707	sru-44	protein_coding
V	16565939	16567572	1634	+	WBGene00005708	sru-45	protein_coding
V	13418951	13420740	1790	-	WBGene00005719	srv-8	protein_coding
V	13421140	13423145	2006	-	WBGene00005720	srv-9	protein_coding
V	13423908	13425266	1359	+	WBGene00005721	srv-10	protein_coding
V	2830878	2832554	1677	+	WBGene00005749	srw-2	protein_coding
V	7705616	7706955	1340	+	WBGene00005750	srw-3	protein_coding
V	2887191	2888781	1591	-	WBGene00005751	srw-4	protein_coding
V	3806261	3807752	1492	+	WBGene00005754	srw-7	protein_coding
V	3032639	3034336	1698	-	WBGene00005755	srw-8	protein_coding
V	15238407	15240315	1909	-	WBGene00005758	srw-11	protein_coding
V	15237170	15238652	1483	-	WBGene00005759	srw-12	protein_coding
V	15232500	15233844	1345	+	WBGene00005760	srw-13	protein_coding
V	15225950	15227472	1523	+	WBGene00005761	srw-14	protein_coding
V	15230543	15231955	1413	+	WBGene00005762	srw-15	protein_coding
V	15273383	15274857	1475	-	WBGene00005763	srw-16	protein_coding
V	15275440	15277015	1576	-	WBGene00005764	srw-17	protein_coding
V	15279782	15281379	1598	-	WBGene00005766	srw-19	protein_coding
V	17078257	17079895	1639	-	WBGene00005767	srw-20	protein_coding
V	15488064	15489401	1338	+	WBGene00005768	srw-21	protein_coding
V	16873942	16875455	1514	+	WBGene00005770	srw-23	protein_coding
V	15223968	15225359	1392	+	WBGene00005771	srw-24	protein_coding
V	16423099	16424528	1430	-	WBGene00005776	srw-29	protein_coding
V	17506589	17508506	1918	+	WBGene00005778	srw-31	protein_coding
V	17508793	17510214	1422	+	WBGene00005779	srw-32	protein_coding
V	15449616	15451521	1906	-	WBGene00005780	srw-33	protein_coding
V	16520531	16522342	1812	-	WBGene00005781	srw-34	protein_coding
V	16692125	16693832	1708	-	WBGene00005789	srw-42	protein_coding
V	16420996	16422774	1779	+	WBGene00005795	srw-48	protein_coding
V	17169442	17170922	1481	-	WBGene00005798	srw-51	protein_coding
V	15943425	15944854	1430	+	WBGene00005800	srw-53	protein_coding
V	16611335	16612703	1369	+	WBGene00005801	srw-54	protein_coding
V	15938776	15940354	1579	-	WBGene00005802	srw-55	protein_coding
V	15951432	15952862	1431	-	WBGene00005803	srw-56	protein_coding
V	15953595	15955032	1438	-	WBGene00005804	srw-57	protein_coding
V	15949716	15951003	1288	-	WBGene00005806	srw-59	protein_coding
V	7425259	7426694	1436	-	WBGene00005815	srw-68	protein_coding
V	7427326	7428980	1655	-	WBGene00005816	srw-69	protein_coding
V	7429339	7431116	1778	-	WBGene00005818	srw-71	protein_coding
V	17467051	17468561	1511	+	WBGene00005819	srw-72	protein_coding
V	16586742	16588528	1787	-	WBGene00005820	srw-73	protein_coding
V	16636883	16638304	1422	-	WBGene00005823	srw-76	protein_coding
V	16641849	16643658	1810	-	WBGene00005824	srw-77	protein_coding
V	19429387	19431136	1750	-	WBGene00005832	srw-85	protein_coding
V	16336626	16338277	1652	+	WBGene00005834	srw-87	protein_coding
V	4017080	4019026	1947	+	WBGene00005836	srw-89	protein_coding
V	1702051	1704053	2003	+	WBGene00005837	srw-90	protein_coding
V	1679208	1680870	1663	-	WBGene00005838	srw-91	protein_coding
V	1676474	1678328	1855	-	WBGene00005845	srw-98	protein_coding
V	1708741	1710663	1923	+	WBGene00005846	srw-99	protein_coding
V	1720227	1721973	1747	+	WBGene00005849	srw-102	protein_coding
V	519852	521617	1766	-	WBGene00005854	srw-107	protein_coding
V	3004141	3006064	1924	-	WBGene00005859	srw-112	protein_coding
V	15333151	15334571	1421	+	WBGene00005860	srw-113	protein_coding
V	2992622	2993916	1295	-	WBGene00005862	srw-115	protein_coding
V	2982152	2983451	1300	-	WBGene00005864	srw-117	protein_coding
V	2978760	2980078	1319	-	WBGene00005865	srw-118	protein_coding
V	2998542	2999836	1295	-	WBGene00005866	srw-119	protein_coding
V	2994899	2996205	1307	-	WBGene00005867	srw-120	protein_coding
V	2990313	2991585	1273	-	WBGene00005868	srw-121	protein_coding
V	2950712	2952202	1491	-	WBGene00005869	srw-122	protein_coding
V	2974029	2975385	1357	-	WBGene00005870	srw-123	protein_coding
V	2976587	2977886	1300	+	WBGene00005871	srw-124	protein_coding
V	7012917	7014412	1496	+	WBGene00005874	srw-127	protein_coding
V	2971949	2973485	1537	+	WBGene00005876	srw-129	protein_coding
V	3546969	3548898	1930	-	WBGene00005877	srw-130	protein_coding
V	4113335	4114727	1393	-	WBGene00005880	srw-133	protein_coding
V	4110634	4112616	1983	-	WBGene00005881	srw-134	protein_coding
V	3008907	3010568	1662	-	WBGene00005883	srw-136	protein_coding
V	2942571	2943959	1389	-	WBGene00005884	srw-137	protein_coding
V	2961632	2963060	1429	-	WBGene00005885	srw-138	protein_coding
V	2984077	2985409	1333	-	WBGene00005886	srw-139	protein_coding
V	5165726	5167241	1516	+	WBGene00005887	srw-140	protein_coding
V	2937311	2938597	1287	-	WBGene00005888	srw-141	protein_coding
V	2957016	2958302	1287	-	WBGene00005889	srw-142	protein_coding
V	2939603	2941505	1903	-	WBGene00005890	srw-143	protein_coding
V	2959189	2960994	1806	-	WBGene00005891	srw-144	protein_coding
V	9003672	9004980	1309	+	WBGene00005892	srx-1	protein_coding
V	9009475	9010830	1356	+	WBGene00005893	srx-2	protein_coding
V	9005543	9006931	1389	+	WBGene00005894	srx-3	protein_coding
V	690875	692770	1896	-	WBGene00005895	srx-4	protein_coding
V	700079	701669	1591	+	WBGene00005896	srx-5	protein_coding
V	7311726	7313333	1608	-	WBGene00005897	srx-6	protein_coding
V	554374	556155	1782	-	WBGene00005899	srx-8	protein_coding
V	7393550	7395459	1910	-	WBGene00005900	srx-9	protein_coding
V	13945160	13946485	1326	-	WBGene00005901	srx-10	protein_coding
V	13841209	13842481	1273	+	WBGene00005908	srx-17	protein_coding
V	677034	678920	1887	+	WBGene00005912	srx-21	protein_coding
V	679963	681465	1503	+	WBGene00005913	srx-22	protein_coding
V	682331	683970	1640	+	WBGene00005914	srx-23	protein_coding
V	2748152	2750106	1955	-	WBGene00005915	srx-24	protein_coding
V	2751256	2753107	1852	-	WBGene00005917	srx-26	protein_coding
V	2755701	2757276	1576	-	WBGene00005919	srx-28	protein_coding
V	15696785	15698199	1415	-	WBGene00005920	srx-29	protein_coding
V	821784	823022	1239	-	WBGene00005922	srx-31	protein_coding
V	819486	820729	1244	-	WBGene00005923	srx-32	protein_coding
V	7117452	7118896	1445	-	WBGene00005924	srx-33	protein_coding
V	7129707	7131074	1368	-	WBGene00005927	srx-36	protein_coding
V	5153906	5155616	1711	-	WBGene00005929	srx-38	protein_coding
V	15397385	15398828	1444	-	WBGene00005931	fbxa-199	protein_coding
V	13921030	13922404	1375	+	WBGene00005933	srx-42	protein_coding
V	9353247	9354497	1251	+	WBGene00005937	srx-46	protein_coding
V	9349987	9351426	1440	+	WBGene00005938	srx-47	protein_coding
V	15302371	15303725	1355	-	WBGene00005939	srx-48	protein_coding
V	15281899	15283562	1664	+	WBGene00005942	srx-51	protein_coding
V	16975219	16976717	1499	+	WBGene00005945	srx-54	protein_coding
V	7374390	7375652	1263	+	WBGene00005947	srx-56	protein_coding
V	15352676	15353985	1310	+	WBGene00005949	srx-58	protein_coding
V	6971867	6973149	1283	+	WBGene00005950	srx-59	protein_coding
V	7400888	7402192	1305	+	WBGene00005951	srx-60	protein_coding
V	3931626	3933394	1769	+	WBGene00005954	srx-63	protein_coding
V	3929399	3930678	1280	+	WBGene00005955	srx-64	protein_coding
V	3919589	3920825	1237	+	WBGene00005957	srx-66	protein_coding
V	3916780	3918538	1759	+	WBGene00005958	srx-67	protein_coding
V	3912772	3914577	1806	+	WBGene00005959	srx-68	protein_coding
V	11891812	11893451	1640	+	WBGene00005967	srx-76	protein_coding
V	4666745	4668736	1992	-	WBGene00005968	srx-77	protein_coding
V	11593727	11594971	1245	+	WBGene00005971	srx-80	protein_coding
V	11599107	11600686	1580	+	WBGene00005975	srx-84	protein_coding
V	11552679	11554223	1545	+	WBGene00005976	srx-85	protein_coding
V	11562943	11564508	1566	+	WBGene00005977	srx-86	protein_coding
V	11564873	11566771	1899	+	WBGene00005978	srx-87	protein_coding
V	11583512	11585115	1604	+	WBGene00005979	srx-88	protein_coding
V	11581126	11582458	1333	+	WBGene00005981	srx-90	protein_coding
V	7324038	7325385	1348	-	WBGene00005983	srx-92	protein_coding
V	3619459	3620708	1250	-	WBGene00005984	srx-93	protein_coding
V	13711360	13713019	1660	+	WBGene00005987	srx-96	protein_coding
V	12630170	12632148	1979	-	WBGene00006004	srx-113	protein_coding
V	8771899	8773893	1995	+	WBGene00006006	srx-115	protein_coding
V	12670907	12672726	1820	+	WBGene00006007	srx-116	protein_coding
V	5644471	5646311	1841	+	WBGene00006008	srx-117	protein_coding
V	3370942	3372773	1832	-	WBGene00006012	srx-121	protein_coding
V	3296108	3297864	1757	-	WBGene00006013	srx-122	protein_coding
V	13837473	13838708	1236	+	WBGene00006019	srx-128	protein_coding
V	13843447	13844962	1516	+	WBGene00006021	srx-130	protein_coding
V	13845436	13846727	1292	+	WBGene00006022	srx-131	protein_coding
V	13848679	13849969	1291	+	WBGene00006024	srx-133	protein_coding
V	13854878	13856476	1599	-	WBGene00006025	srx-134	protein_coding
V	13857432	13859021	1590	+	WBGene00006027	srx-136	protein_coding
V	13862805	13864199	1395	+	WBGene00006028	srx-137	protein_coding
V	8052151	8053730	1580	+	WBGene00006060	sth-1	protein_coding
V	9822619	9824249	1631	-	WBGene00006070	str-2	protein_coding
V	13337904	13339733	1830	-	WBGene00006072	str-4	protein_coding
V	15753241	15754573	1333	+	WBGene00006073	str-5	protein_coding
V	15748856	15750230	1375	-	WBGene00006074	str-6	protein_coding
V	16097824	16099541	1718	-	WBGene00006075	str-7	protein_coding
V	15755031	15756394	1364	+	WBGene00006076	str-8	protein_coding
V	15758749	15760465	1717	+	WBGene00006077	str-9	protein_coding
V	15610890	15612591	1702	+	WBGene00006080	str-12	protein_coding
V	2725902	2727201	1300	-	WBGene00006081	str-13	protein_coding
V	16453393	16455165	1773	-	WBGene00006082	str-14	protein_coding
V	16457269	16458814	1546	-	WBGene00006083	str-15	protein_coding
V	15740370	15741951	1582	-	WBGene00006085	str-18	protein_coding
V	15742776	15744466	1691	-	WBGene00006086	str-19	protein_coding
V	756469	757892	1424	+	WBGene00006087	str-20	protein_coding
V	15644875	15646478	1604	+	WBGene00006090	str-23	protein_coding
V	16115681	16116897	1217	+	WBGene00006092	str-25	protein_coding
V	15734023	15735820	1798	-	WBGene00006093	str-27	protein_coding
V	7471651	7472915	1265	-	WBGene00006094	str-28	protein_coding
V	3725072	3726775	1704	+	WBGene00006096	str-30	protein_coding
V	7506869	7508666	1798	-	WBGene00006097	str-31	protein_coding
V	4879945	4881477	1533	-	WBGene00006098	str-32	protein_coding
V	2728536	2730243	1708	+	WBGene00006099	str-33	protein_coding
V	13327763	13329058	1296	+	WBGene00006102	str-37	protein_coding
V	15730744	15732309	1566	-	WBGene00006103	str-38	protein_coding
V	15750932	15752149	1218	-	WBGene00006108	str-43	protein_coding
V	15158991	15160546	1556	+	WBGene00006110	str-45	protein_coding
V	2898297	2899967	1671	-	WBGene00006111	str-46	protein_coding
V	7645754	7647100	1347	+	WBGene00006112	str-47	protein_coding
V	16415694	16417114	1421	-	WBGene00006120	str-55	protein_coding
V	15870656	15872398	1743	+	WBGene00006122	str-57	protein_coding
V	15897996	15899415	1420	+	WBGene00006124	str-60	protein_coding
V	16669339	16671290	1952	-	WBGene00006125	str-61	protein_coding
V	3283257	3284529	1273	+	WBGene00006127	str-64	protein_coding
V	1062588	1064591	2004	-	WBGene00006129	str-67	protein_coding
V	3106228	3107550	1323	-	WBGene00006130	str-68	protein_coding
V	15457815	15459188	1374	-	WBGene00006133	str-71	protein_coding
V	16430240	16431861	1622	+	WBGene00006134	str-73	protein_coding
V	2514234	2515593	1360	-	WBGene00006136	str-76	protein_coding
V	3974661	3976264	1604	+	WBGene00006141	str-82	protein_coding
V	3977264	3978811	1548	+	WBGene00006142	str-83	protein_coding
V	8979463	8980945	1483	-	WBGene00006143	str-84	protein_coding
V	8984525	8985840	1316	-	WBGene00006144	str-85	protein_coding
V	8982387	8983704	1318	-	WBGene00006145	str-86	protein_coding
V	8986574	8988204	1631	-	WBGene00006146	str-87	protein_coding
V	15382439	15383839	1401	-	WBGene00006147	str-88	protein_coding
V	17674946	17676653	1708	-	WBGene00006150	str-92	protein_coding
V	17671700	17673443	1744	-	WBGene00006151	str-93	protein_coding
V	9248031	9249306	1276	-	WBGene00006152	str-94	protein_coding
V	15292490	15293965	1476	-	WBGene00006153	str-96	protein_coding
V	16153855	16155211	1357	-	WBGene00006154	str-97	protein_coding
V	15385033	15386653	1621	+	WBGene00006157	str-102	protein_coding
V	16117363	16118701	1339	-	WBGene00006158	str-103	protein_coding
V	16160685	16162224	1540	-	WBGene00006161	str-109	protein_coding
V	16167875	16169126	1252	-	WBGene00006162	str-111	protein_coding
V	3649773	3651457	1685	+	WBGene00006165	str-114	protein_coding
V	11269091	11270426	1336	+	WBGene00006166	str-115	protein_coding
V	11266981	11268323	1343	+	WBGene00006167	str-116	protein_coding
V	10052155	10053873	1719	+	WBGene00006169	str-118	protein_coding
V	2426479	2428124	1646	-	WBGene00006170	str-119	protein_coding
V	17074290	17076000	1711	-	WBGene00006176	str-125	protein_coding
V	8090973	8092485	1513	-	WBGene00006178	str-129	protein_coding
V	8089268	8090695	1428	-	WBGene00006179	str-130	protein_coding
V	8080149	8081679	1531	-	WBGene00006180	str-131	protein_coding
V	743648	745475	1828	+	WBGene00006182	str-134	protein_coding
V	8279375	8280870	1496	-	WBGene00006183	str-135	protein_coding
V	8277516	8278930	1415	-	WBGene00006184	str-136	protein_coding
V	8060873	8062174	1302	-	WBGene00006186	str-139	protein_coding
V	8058659	8060317	1659	+	WBGene00006187	str-138	protein_coding
V	11322322	11323820	1499	-	WBGene00006189	str-141	protein_coding
V	8068152	8069737	1586	-	WBGene00006190	str-143	protein_coding
V	8070643	8072147	1505	-	WBGene00006191	str-144	protein_coding
V	8096394	8098339	1946	-	WBGene00006192	str-145	protein_coding
V	16573468	16574952	1485	+	WBGene00006196	str-149	protein_coding
V	16583273	16585174	1902	+	WBGene00006197	str-150	protein_coding
V	16576200	16578126	1927	+	WBGene00006198	str-151	protein_coding
V	1734869	1736767	1899	+	WBGene00006205	str-160	protein_coding
V	13831113	13832977	1865	+	WBGene00006210	str-165	protein_coding
V	9197751	9198987	1237	-	WBGene00006221	str-177	protein_coding
V	6667286	6668841	1556	-	WBGene00006224	str-180	protein_coding
V	10231821	10233430	1610	-	WBGene00006226	str-182	protein_coding
V	9716697	9718051	1355	+	WBGene00006230	str-188	protein_coding
V	7477290	7478504	1215	-	WBGene00006231	str-190	protein_coding
V	9820554	9821824	1271	-	WBGene00006232	str-193	protein_coding
V	491732	493641	1910	+	WBGene00006233	str-196	protein_coding
V	16047808	16049147	1340	+	WBGene00006234	str-198	protein_coding
V	17189186	17190499	1314	-	WBGene00006235	str-199	protein_coding
V	17456619	17458169	1551	-	WBGene00006236	str-200	protein_coding
V	7159691	7161016	1326	+	WBGene00006237	str-204	protein_coding
V	4928278	4929942	1665	-	WBGene00006238	str-205	protein_coding
V	6218134	6219562	1429	+	WBGene00006239	str-206	protein_coding
V	4951734	4953035	1302	+	WBGene00006240	str-207	protein_coding
V	4956829	4958572	1744	+	WBGene00006241	str-208	protein_coding
V	16315304	16317226	1923	+	WBGene00006247	str-214	protein_coding
V	16998933	17000304	1372	-	WBGene00006249	str-217	protein_coding
V	1640308	1642287	1980	+	WBGene00006252	str-221	protein_coding
V	3507822	3509251	1430	+	WBGene00006256	str-225	protein_coding
V	3512681	3514343	1663	+	WBGene00006257	str-226	protein_coding
V	3518189	3519801	1613	+	WBGene00006258	str-227	protein_coding
V	3510178	3512038	1861	+	WBGene00006259	str-228	protein_coding
V	14209170	14210843	1674	-	WBGene00006261	str-230	protein_coding
V	16006304	16007605	1302	-	WBGene00006262	str-231	protein_coding
V	16014509	16015752	1244	-	WBGene00006263	str-232	protein_coding
V	16008332	16009664	1333	-	WBGene00006264	str-233	protein_coding
V	1526467	1528085	1619	-	WBGene00006265	str-236	protein_coding
V	1520343	1521945	1603	-	WBGene00006268	str-240	protein_coding
V	1522785	1524224	1440	+	WBGene00006270	str-243	protein_coding
V	3057573	3059096	1524	-	WBGene00006271	str-244	protein_coding
V	3954039	3955460	1422	+	WBGene00006274	str-247	protein_coding
V	15628125	15629643	1519	-	WBGene00006275	str-248	protein_coding
V	13918641	13920032	1392	+	WBGene00006277	str-250	protein_coding
V	13916496	13918051	1556	+	WBGene00006278	str-252	protein_coding
V	2252772	2254603	1832	-	WBGene00006279	str-253	protein_coding
V	16151978	16153475	1498	-	WBGene00006280	str-254	protein_coding
V	499770	501330	1561	-	WBGene00006282	str-256	protein_coding
V	751326	752779	1454	-	WBGene00006288	str-262	protein_coding
V	15613186	15614968	1783	+	WBGene00006289	str-263	protein_coding
V	13191700	13193538	1839	-	WBGene00006311	sun-1	protein_coding
V	5536487	5537717	1231	+	WBGene00006376	syp-2	protein_coding
V	8549289	8551207	1919	+	WBGene00006435	stdh-4	protein_coding
V	15575498	15577445	1948	-	WBGene00006446	atx-3	protein_coding
V	14447651	14449593	1943	+	WBGene00006465	fntb-1	protein_coding
V	16569387	16570797	1411	-	WBGene00006471	nhr-233	protein_coding
V	10806141	10807912	1772	-	WBGene00006481	plrg-1	protein_coding
V	10210444	10212127	1684	-	WBGene00006489	zhit-3	protein_coding
V	12261531	12263368	1838	+	WBGene00006539	tbb-6	protein_coding
V	16833638	16835128	1491	-	WBGene00006585	tni-3	protein_coding
V	9347044	9348685	1642	+	WBGene00006623	try-5	protein_coding
V	6509910	6511409	1500	-	WBGene00006721	ubh-1	protein_coding
V	5097075	5099025	1951	-	WBGene00006782	unc-46	protein_coding
V	14534405	14536374	1970	-	WBGene00007049	tag-191	protein_coding
V	10372321	10374261	1941	+	WBGene00007070	ugt-49	protein_coding
V	10287560	10289292	1733	+	WBGene00007096	B0024.3	protein_coding
V	10297399	10298985	1587	+	WBGene00007097	B0024.4	protein_coding
V	10320711	10322304	1594	+	WBGene00007102	B0024.13	protein_coding
V	10290043	10291718	1676	+	WBGene00007104	B0024.15	protein_coding
V	20490771	20492485	1715	-	WBGene00007123	srbc-79	protein_coding
V	20487645	20489202	1558	-	WBGene00007127	srbc-78	protein_coding
V	13133635	13134886	1252	-	WBGene00007152	clec-225	protein_coding
V	15593384	15594673	1290	-	WBGene00007164	fbxa-139	protein_coding
V	15084059	15085385	1327	-	WBGene00007235	ahsa-1	protein_coding
V	15082530	15084147	1618	+	WBGene00007236	C01G10.9	protein_coding
V	15092966	15094389	1424	+	WBGene00007241	txt-12	protein_coding
V	11291188	11292569	1382	+	WBGene00007279	C03E10.1	protein_coding
V	13896663	13898487	1825	-	WBGene00007362	cyp-35C1	protein_coding
V	13906492	13908037	1546	+	WBGene00007363	stdh-1	protein_coding
V	13904611	13905996	1386	+	WBGene00007364	stdh-3	protein_coding
V	13909686	13911585	1900	+	WBGene00007366	C06B3.7	protein_coding
V	11141479	11143121	1643	+	WBGene00007388	folt-1	protein_coding
V	11142951	11144794	1844	-	WBGene00007391	C06H2.7	protein_coding
V	17895314	17896786	1473	-	WBGene00007392	fbxa-156	protein_coding
V	10119530	10120997	1468	-	WBGene00007432	srxa-18	protein_coding
V	18361031	18362502	1472	-	WBGene00007437	C08E8.1	protein_coding
V	18371846	18373532	1687	+	WBGene00007440	C08E8.4	protein_coding
V	10219401	10220705	1305	-	WBGene00007540	C12D8.13	protein_coding
V	12118694	12120481	1788	-	WBGene00007551	C13C4.7	protein_coding
V	18158026	18159614	1589	+	WBGene00007565	clec-48	protein_coding
V	18163437	18164858	1422	-	WBGene00007569	C14A6.5	protein_coding
V	18165288	18167261	1974	-	WBGene00007570	C14A6.6	protein_coding
V	12588330	12589644	1315	+	WBGene00007584	C14C10.1	protein_coding
V	12590976	12592479	1504	-	WBGene00007585	C14C10.2	protein_coding
V	12734198	12736041	1844	+	WBGene00007604	xbx-9	protein_coding
V	12748007	12749992	1986	+	WBGene00007607	C15C8.5	protein_coding
V	12749707	12751545	1839	-	WBGene00007608	C15C8.6	protein_coding
V	14423784	14425008	1225	-	WBGene00007617	rrbs-1	protein_coding
V	14392130	14393556	1427	+	WBGene00007618	C15H11.10	protein_coding
V	17528029	17529910	1882	+	WBGene00007678	srz-90	protein_coding
V	15050887	15052530	1644	-	WBGene00007716	fbxa-82	protein_coding
V	15059808	15061532	1725	+	WBGene00007722	C25D7.15	protein_coding
V	19403530	19405326	1797	-	WBGene00007726	C25F9.6	protein_coding
V	19395050	19396613	1564	+	WBGene00007727	C25F9.8	protein_coding
V	19416611	19418030	1420	+	WBGene00007728	C25F9.9	protein_coding
V	9978791	9980802	2012	-	WBGene00007784	ruvb-1	protein_coding
V	9981147	9982766	1620	+	WBGene00007785	tofu-1	protein_coding
V	9986431	9987788	1358	-	WBGene00007787	C27H6.8	protein_coding
V	15349303	15350715	1413	-	WBGene00007805	clec-231	protein_coding
V	15347847	15349144	1298	-	WBGene00007806	clec-230	protein_coding
V	18179963	18181373	1411	+	WBGene00007850	C31G12.1	protein_coding
V	13095954	13097457	1504	+	WBGene00007910	C34B4.5	protein_coding
V	10509137	10510489	1353	+	WBGene00007950	C35A5.6	protein_coding
V	17551388	17552859	1472	-	WBGene00008016	C38D9.8	protein_coding
V	17549675	17551209	1535	+	WBGene00008017	fbxa-176	protein_coding
V	15233894	15235761	1868	-	WBGene00008056	nhr-164	protein_coding
V	15221630	15223114	1485	+	WBGene00008057	irld-25	protein_coding
V	19310079	19311491	1413	-	WBGene00008070	C43D7.8	protein_coding
V	12852902	12854866	1965	-	WBGene00008102	C44H9.7	protein_coding
V	11042710	11043980	1271	+	WBGene00008105	C45B11.2	protein_coding
V	17777924	17779522	1599	+	WBGene00008129	C47A10.12	protein_coding
V	14683698	14685485	1788	-	WBGene00008143	C47E8.4	protein_coding
V	13336369	13337957	1589	+	WBGene00008222	C50B6.9	protein_coding
V	13566931	13568630	1700	-	WBGene00008225	nuaf-1	protein_coding
V	13572012	13573423	1412	+	WBGene00008226	C50B8.4	protein_coding
V	13578972	13580800	1829	+	WBGene00008228	C50B8.6	protein_coding
V	9534921	9536404	1484	+	WBGene00008231	tag-329	protein_coding
V	9517519	9518859	1341	-	WBGene00008233	C50F4.8	protein_coding
V	9529951	9531577	1627	-	WBGene00008235	C50F4.10	protein_coding
V	9539845	9541606	1762	-	WBGene00008238	C50F4.16	protein_coding
V	9922781	9924186	1406	+	WBGene00008243	C50H2.7	protein_coding
V	9926540	9927884	1345	+	WBGene00008246	C50H2.13	protein_coding
V	10154998	10156381	1384	+	WBGene00008250	srsx-29	protein_coding
V	10158828	10160672	1845	+	WBGene00008251	srsx-30	protein_coding
V	11994295	11995865	1571	+	WBGene00008259	C52E4.7	protein_coding
V	14556966	14558857	1892	-	WBGene00008267	C53A5.9	protein_coding
V	14559612	14561293	1682	+	WBGene00008268	srt-32	protein_coding
V	14562889	14564639	1751	+	WBGene00008269	C53A5.11	protein_coding
V	12419413	12420943	1531	-	WBGene00008299	C54D10.4	protein_coding
V	12429339	12431348	2010	+	WBGene00008300	C54D10.5	protein_coding
V	12445164	12446995	1832	-	WBGene00008302	pals-38	protein_coding
V	12447153	12448705	1553	+	WBGene00008303	C54D10.9	protein_coding
V	12448682	12450002	1321	-	WBGene00008304	C54D10.10	protein_coding
V	15621818	15623077	1260	+	WBGene00008321	C55A1.1	protein_coding
V	15637416	15638953	1538	-	WBGene00008327	srz-44	protein_coding
V	11512309	11513532	1224	-	WBGene00008332	C55A6.3	protein_coding
V	11516445	11517889	1445	-	WBGene00008333	C55A6.4	protein_coding
V	11521703	11523384	1682	+	WBGene00008338	pafo-1	protein_coding
V	13550516	13551754	1239	-	WBGene00008343	C56A3.4	protein_coding
V	13551967	13553373	1407	+	WBGene00008344	C56A3.5	protein_coding
V	13560278	13561993	1716	+	WBGene00008346	C56A3.8	protein_coding
V	10768463	10770217	1755	-	WBGene00008370	D1054.1	protein_coding
V	10771451	10772832	1382	+	WBGene00008371	D1054.3	protein_coding
V	10804721	10806034	1314	-	WBGene00008380	prp-38	protein_coding
V	14098858	14100691	1834	+	WBGene00008388	D1086.1	protein_coding
V	14096944	14098668	1725	-	WBGene00008389	D1086.2	protein_coding
V	14088891	14090359	1469	-	WBGene00008392	D1086.5	protein_coding
V	14079801	14081766	1966	+	WBGene00008393	D1086.6	protein_coding
V	14084270	14085811	1542	+	WBGene00008394	D1086.7	protein_coding
V	11827354	11829370	2017	+	WBGene00008410	D2023.6	protein_coding
V	12566016	12567950	1935	-	WBGene00008454	E02A10.4	protein_coding
V	11261154	11263125	1972	-	WBGene00008550	F07B10.4	protein_coding
V	17476790	17478083	1294	+	WBGene00008574	srbc-61	protein_coding
V	14461947	14463338	1392	-	WBGene00008591	F08H9.3	protein_coding
V	14472529	14474374	1846	+	WBGene00008593	clec-227	protein_coding
V	16887357	16888888	1532	-	WBGene00008615	ifas-2	protein_coding
V	16889275	16890749	1475	+	WBGene00008616	fbxa-44	protein_coding
V	16878827	16880154	1328	-	WBGene00008617	F09C6.3	protein_coding
V	16904912	16906787	1876	+	WBGene00008619	nhr-262	protein_coding
V	13866691	13868602	1912	+	WBGene00008630	nhr-175	protein_coding
V	16142671	16144666	1996	+	WBGene00008633	fbxa-18	protein_coding
V	16164019	16165473	1455	+	WBGene00008637	F10A3.12	protein_coding
V	16205188	16206818	1631	+	WBGene00008675	irld-26	protein_coding
V	16224327	16225655	1329	+	WBGene00008678	stdh-2	protein_coding
V	18745718	18746987	1270	-	WBGene00008703	clec-251	protein_coding
V	16376239	16377949	1711	-	WBGene00008724	F13A7.1	protein_coding
V	16382076	16383829	1754	-	WBGene00008725	F13A7.7	protein_coding
V	16394015	16395304	1290	-	WBGene00008726	F13A7.11	protein_coding
V	16399688	16401625	1938	+	WBGene00008728	sre-36	protein_coding
V	14291905	14293717	1813	-	WBGene00008789	F14D7.2	protein_coding
V	16675853	16677551	1699	+	WBGene00008814	srz-1	protein_coding
V	16677623	16679337	1715	-	WBGene00008815	srz-103	protein_coding
V	16694838	16696592	1755	+	WBGene00008818	srz-101	protein_coding
V	16051923	16053473	1551	-	WBGene00008822	F14H3.3	protein_coding
V	16055806	16057060	1255	-	WBGene00008824	F14H3.5	protein_coding
V	16057322	16058893	1572	-	WBGene00008825	F14H3.6	protein_coding
V	16060526	16062093	1568	-	WBGene00008826	fbxa-100	protein_coding
V	16071325	16072738	1414	+	WBGene00008830	nhr-176	protein_coding
V	15019057	15020329	1273	-	WBGene00008833	F14H8.2	protein_coding
V	10417510	10419061	1552	-	WBGene00008872	F15H10.5	protein_coding
V	10401447	10402904	1458	-	WBGene00008875	F15H10.8	protein_coding
V	18189481	18191115	1635	+	WBGene00008892	clec-246	protein_coding
V	18222692	18224453	1762	-	WBGene00008900	F16H6.10	protein_coding
V	10951860	10953472	1613	+	WBGene00008915	F17C11.4	protein_coding
V	10956999	10958821	1823	-	WBGene00008918	pigt-1	protein_coding
V	10958931	10960669	1739	-	WBGene00008919	vps-36	protein_coding
V	12769246	12771018	1773	+	WBGene00008937	srt-43	protein_coding
V	20162615	20164165	1551	-	WBGene00008944	F19B2.5	protein_coding
V	17458533	17460161	1629	-	WBGene00008981	srz-48	protein_coding
V	17436985	17438417	1433	-	WBGene00008982	srsx-2	protein_coding
V	13752264	13753581	1318	-	WBGene00008985	F20G2.1	protein_coding
V	13755011	13756409	1399	-	WBGene00008986	F20G2.2	protein_coding
V	15517713	15519681	1969	+	WBGene00008993	F21A3.3	protein_coding
V	15536620	15538059	1440	+	WBGene00008994	F21A3.4	protein_coding
V	15543106	15544994	1889	-	WBGene00008996	glb-14	protein_coding
V	16237523	16238829	1307	+	WBGene00009031	F21H7.5	protein_coding
V	14429165	14430410	1246	+	WBGene00009079	F23B12.1	protein_coding
V	14445323	14447290	1968	-	WBGene00009082	dlat-1	protein_coding
V	12371686	12372969	1284	+	WBGene00009095	F23H12.7	protein_coding
V	9568726	9570297	1572	-	WBGene00009102	F25B3.5	protein_coding
V	10528724	10530636	1913	+	WBGene00009108	F25D1.3	protein_coding
V	13453634	13455447	1814	+	WBGene00009134	lurp-2	protein_coding
V	13458083	13459526	1444	+	WBGene00009135	F25H9.2	protein_coding
V	13455748	13457737	1990	+	WBGene00009136	lurp-3	protein_coding
V	13466924	13468361	1438	-	WBGene00009138	F25H9.6	protein_coding
V	16431928	16433571	1644	-	WBGene00009150	clec-234	protein_coding
V	16437846	16439072	1227	+	WBGene00009153	F26D2.15	protein_coding
V	16418350	16419869	1520	-	WBGene00009154	F26D2.16	protein_coding
V	20565289	20566554	1266	-	WBGene00009168	F26F2.3	protein_coding
V	17042563	17043845	1283	+	WBGene00009195	hpo-33	protein_coding
V	15571476	15572715	1240	+	WBGene00009222	fbxa-95	protein_coding
V	15574098	15575405	1308	-	WBGene00009223	mdt-28	protein_coding
V	15572913	15574155	1243	+	WBGene00009225	fbxa-94	protein_coding
V	16280548	16282321	1774	-	WBGene00009227	F28G4.2	protein_coding
V	16286095	16287719	1625	-	WBGene00009228	F28G4.3	protein_coding
V	10758958	10760663	1706	+	WBGene00009241	F28H7.8	protein_coding
V	10658235	10659658	1424	+	WBGene00009256	tut-2	protein_coding
V	20866749	20868429	1681	-	WBGene00009293	F31D4.8	protein_coding
V	17322590	17324526	1937	+	WBGene00009296	F31E9.3	protein_coding
V	17326449	17327967	1519	-	WBGene00009297	sdz-16	protein_coding
V	17318147	17319515	1369	+	WBGene00009298	srz-58	protein_coding
V	17313569	17315153	1585	-	WBGene00009299	F31E9.6	protein_coding
V	10891597	10893560	1964	-	WBGene00009329	F32D8.4	protein_coding
V	10901420	10902782	1363	-	WBGene00009332	F32D8.8	protein_coding
V	13356083	13358037	1955	-	WBGene00009347	F32H5.1	protein_coding
V	11610737	11612596	1860	+	WBGene00009385	sas-5	protein_coding
V	11613307	11614888	1582	+	WBGene00009386	tag-290	protein_coding
V	11616805	11618273	1469	-	WBGene00009387	glb-15	protein_coding
V	15904192	15905630	1439	-	WBGene00009417	F35E8.1	protein_coding
V	15905661	15907026	1366	+	WBGene00009418	F35E8.2	protein_coding
V	15916334	15917558	1225	-	WBGene00009422	F35E8.9	protein_coding
V	13737010	13738474	1465	-	WBGene00009429	irg-5	protein_coding
V	13734309	13736247	1939	-	WBGene00009430	F35E12.6	protein_coding
V	16516472	16517719	1248	-	WBGene00009470	F36D3.4	protein_coding
V	16527158	16528806	1649	+	WBGene00009473	F36D3.8	protein_coding
V	15968418	15969753	1336	-	WBGene00009486	F36G9.7	protein_coding
V	15976145	15977618	1474	+	WBGene00009487	clec-232	protein_coding
V	20773743	20775369	1627	-	WBGene00009528	F38A6.4	protein_coding
V	11543963	11545295	1333	+	WBGene00009533	F38B7.2	protein_coding
V	17176716	17178067	1352	-	WBGene00009566	srsx-1	protein_coding
V	17174038	17175530	1493	+	WBGene00009567	srbc-25	protein_coding
V	17171851	17173313	1463	+	WBGene00009568	srbc-26	protein_coding
V	17166028	17167557	1530	-	WBGene00009569	srz-66	protein_coding
V	17155874	17157254	1381	-	WBGene00009572	F40D4.13	protein_coding
V	14259544	14260931	1388	-	WBGene00009597	F40G12.2	protein_coding
V	14269191	14270829	1639	-	WBGene00009600	F40G12.5	protein_coding
V	14271131	14273119	1989	-	WBGene00009601	F40G12.6	protein_coding
V	14274568	14276551	1984	+	WBGene00009602	F40G12.7	protein_coding
V	14278312	14279877	1566	-	WBGene00009603	srt-33	protein_coding
V	14283541	14285327	1787	+	WBGene00009605	F40G12.10	protein_coding
V	14286171	14288056	1886	+	WBGene00009606	F40G12.11	protein_coding
V	14631888	14633136	1249	+	WBGene00009652	F43D2.3	protein_coding
V	16112992	16114337	1346	-	WBGene00009707	srxa-16	protein_coding
V	16131135	16132805	1671	-	WBGene00009709	fbxa-144	protein_coding
V	12527058	12528353	1296	+	WBGene00009721	F45D3.1	protein_coding
V	12541039	12542977	1939	+	WBGene00009722	F45D3.2	protein_coding
V	20626711	20628206	1496	+	WBGene00009763	srz-18	protein_coding
V	20630061	20631355	1295	-	WBGene00009765	F46B3.14	protein_coding
V	9777860	9779518	1659	-	WBGene00009769	F46B6.4	protein_coding
V	9791567	9793241	1675	+	WBGene00009773	lipl-2	protein_coding
V	9796862	9798280	1419	+	WBGene00009774	F46B6.9	protein_coding
V	11667476	11669390	1915	+	WBGene00009791	F46F3.3	protein_coding
V	14321367	14323003	1637	-	WBGene00009804	F47B8.3	protein_coding
V	14333416	14334806	1391	+	WBGene00009808	srm-4	protein_coding
V	14336955	14338808	1854	+	WBGene00009810	srm-6	protein_coding
V	11329400	11330775	1376	+	WBGene00009833	F47G9.6	protein_coding
V	17348665	17350193	1529	-	WBGene00009834	lsy-27	protein_coding
V	16856419	16858077	1659	-	WBGene00009854	clec-31	protein_coding
V	16858429	16860040	1612	+	WBGene00009855	clec-22	protein_coding
V	16862012	16863890	1879	+	WBGene00009856	clec-24	protein_coding
V	16865704	16867293	1590	+	WBGene00009857	clec-28	protein_coding
V	16860228	16861819	1592	-	WBGene00009860	clec-32	protein_coding
V	17010014	17011849	1836	+	WBGene00009905	clec-240	protein_coding
V	17012049	17013332	1284	-	WBGene00009906	clec-241	protein_coding
V	11000963	11002534	1572	-	WBGene00009967	F53B7.4	protein_coding
V	13775796	13777772	1977	+	WBGene00009971	F53C11.1	protein_coding
V	13782399	13784109	1711	+	WBGene00009973	F53C11.3	protein_coding
V	13406816	13408265	1450	+	WBGene00009980	F53F1.2	protein_coding
V	13408242	13409832	1591	+	WBGene00009981	F53F1.3	protein_coding
V	13416096	13417613	1518	-	WBGene00009984	F53F1.6	protein_coding
V	13588147	13589594	1448	-	WBGene00009986	F53F4.2	protein_coding
V	13612414	13613970	1557	-	WBGene00009990	F53F4.7	protein_coding
V	13626047	13627487	1441	+	WBGene00009994	F53F4.12	protein_coding
V	20681420	20683014	1595	+	WBGene00009999	srsx-35	protein_coding
V	15814232	15815971	1740	-	WBGene00010018	fbxa-69	protein_coding
V	15832436	15833722	1287	-	WBGene00010025	srbc-54	protein_coding
V	12919986	12921692	1707	+	WBGene00010062	lipl-1	protein_coding
V	12922608	12924156	1549	+	WBGene00010063	dhrs-4	protein_coding
V	11763139	11764385	1247	-	WBGene00010075	F55A11.1	protein_coding
V	11783149	11784628	1480	+	WBGene00010082	F55A11.11	protein_coding
V	13815374	13816977	1604	-	WBGene00010088	F55B12.2	protein_coding
V	12270271	12271551	1281	-	WBGene00010094	tsfm-1	protein_coding
V	19282614	19284639	2026	+	WBGene00010099	fbxb-117	protein_coding
V	11386728	11388678	1951	+	WBGene00010108	F55C10.4	protein_coding
V	11383105	11384353	1249	+	WBGene00010109	F55C10.5	protein_coding
V	10069369	10070641	1273	-	WBGene00010180	nhr-192	protein_coding
V	10071945	10073893	1949	-	WBGene00010181	F57A8.6	protein_coding
V	15774906	15776751	1846	-	WBGene00010186	nhr-283	protein_coding
V	13193928	13195648	1721	-	WBGene00010187	F57B1.1	protein_coding
V	11441916	11443603	1688	-	WBGene00010192	F57B7.2	protein_coding
V	12003053	12004584	1532	+	WBGene00010204	cpr-9	protein_coding
V	12004611	12006595	1985	-	WBGene00010205	F57F5.3	protein_coding
V	10932693	10934245	1553	+	WBGene00010238	F58B4.5	protein_coding
V	10925031	10926860	1830	+	WBGene00010239	F58B4.6	protein_coding
V	14015978	14017576	1599	-	WBGene00010261	srh-308	protein_coding
V	11963007	11964823	1817	-	WBGene00010290	F58H1.7	protein_coding
V	17660303	17661810	1508	+	WBGene00010296	dgat-2	protein_coding
V	17666075	17667776	1702	-	WBGene00010298	F59A1.12	protein_coding
V	15340006	15341504	1499	-	WBGene00010355	clec-229	protein_coding
V	14887491	14889094	1604	-	WBGene00010378	H12D21.2	protein_coding
V	14915899	14917717	1819	+	WBGene00010387	H12D21.11	protein_coding
V	14110342	14112046	1705	+	WBGene00010432	H39E23.2	protein_coding
V	12377556	12378934	1379	+	WBGene00010461	K01D12.1	protein_coding
V	12407366	12408625	1260	-	WBGene00010470	cdr-4	protein_coding
V	12412487	12413701	1215	-	WBGene00010471	cdr-6	protein_coding
V	12410879	12412113	1235	-	WBGene00010472	cdr-7	protein_coding
V	20380561	20382036	1476	+	WBGene00010507	K02E2.6	protein_coding
V	20365708	20366939	1232	-	WBGene00010509	K02E2.8	protein_coding
V	14244204	14246104	1901	+	WBGene00010511	sre-7	protein_coding
V	11407584	11409543	1960	+	WBGene00010524	K03B8.6	protein_coding
V	11409467	11411002	1536	-	WBGene00010525	K03B8.8	protein_coding
V	17492077	17493832	1756	-	WBGene00010534	fbxa-102	protein_coding
V	16170242	16171821	1580	-	WBGene00010591	K05D4.9	protein_coding
V	9489947	9491490	1544	-	WBGene00010597	K06A4.7	protein_coding
V	15685716	15687715	2000	+	WBGene00010600	nhr-196	protein_coding
V	15690252	15691606	1355	+	WBGene00010601	nhr-268	protein_coding
V	15687960	15689794	1835	+	WBGene00010602	nhr-197	protein_coding
V	15698528	15699899	1372	-	WBGene00010604	nhr-199	protein_coding
V	10339500	10340971	1472	+	WBGene00010625	K07C5.2	protein_coding
V	10356285	10357903	1619	-	WBGene00010628	ceeh-2	protein_coding
V	15861452	15862699	1248	-	WBGene00010688	srz-12	protein_coding
V	11888248	11889650	1403	+	WBGene00010790	sodh-1	protein_coding
V	11889581	11891243	1663	-	WBGene00010791	sodh-2	protein_coding
V	11894331	11895916	1586	+	WBGene00010792	K12G11.6	protein_coding
V	15257581	15259149	1569	-	WBGene00010800	srsx-37	protein_coding
V	15255132	15256769	1638	-	WBGene00010802	srsx-39	protein_coding
V	15260890	15262436	1547	-	WBGene00010803	M01B2.10	protein_coding
V	19784129	19785961	1833	+	WBGene00010929	srt-45	protein_coding
V	19776080	19777327	1248	-	WBGene00010934	fbxa-118	protein_coding
V	14508249	14509655	1407	+	WBGene00010976	R02D5.1	protein_coding
V	10080083	10081776	1694	-	WBGene00011002	nhr-205	protein_coding
V	10087480	10089002	1523	+	WBGene00011003	R04B5.5	protein_coding
V	10089157	10090561	1405	-	WBGene00011005	R04B5.7	protein_coding
V	12308725	12310356	1632	-	WBGene00011014	hpo-30	protein_coding
V	12318381	12320236	1856	+	WBGene00011015	R04F11.2	protein_coding
V	9837979	9839508	1530	+	WBGene00011084	srsx-21	protein_coding
V	12068724	12070519	1796	-	WBGene00011089	kmo-1	protein_coding
V	12087234	12088931	1698	+	WBGene00011095	gana-1	protein_coding
V	12092006	12093873	1868	+	WBGene00011097	nhr-206	protein_coding
V	12096146	12097931	1786	+	WBGene00011098	nhr-207	protein_coding
V	12094317	12095895	1579	+	WBGene00011099	nhr-208	protein_coding
V	14714207	14715708	1502	-	WBGene00011133	R08A2.2	protein_coding
V	14712616	14714070	1455	+	WBGene00011136	R08A2.5	protein_coding
V	14723320	14724766	1447	+	WBGene00011137	R08A2.7	protein_coding
V	15368470	15369807	1338	-	WBGene00011150	nhr-269	protein_coding
V	13946969	13948923	1955	+	WBGene00011186	clec-226	protein_coding
V	13954356	13956176	1821	+	WBGene00011190	swt-6	protein_coding
V	13962417	13963840	1424	+	WBGene00011194	R10D12.13	protein_coding
V	13963926	13965801	1876	+	WBGene00011195	sao-1	protein_coding
V	13967866	13969853	1988	-	WBGene00011196	R10D12.15	protein_coding
V	12712976	12714220	1245	-	WBGene00011245	R11D1.4	protein_coding
V	14610713	14612222	1510	-	WBGene00011253	R11H6.5	protein_coding
V	17747966	17749243	1278	-	WBGene00011254	R12G8.1	protein_coding
V	11860675	11862289	1615	+	WBGene00011263	R13H4.5	protein_coding
V	11863117	11864913	1797	+	WBGene00011264	R13H4.6	protein_coding
V	11866438	11868242	1805	-	WBGene00011265	R13H4.7	protein_coding
V	12961474	12963343	1870	-	WBGene00011305	hrg-9	protein_coding
V	14993838	14995207	1370	+	WBGene00011321	fil-1	protein_coding
V	14996536	14998150	1615	+	WBGene00011322	irld-14	protein_coding
V	15005100	15006400	1301	+	WBGene00011324	hrde-2	protein_coding
V	13705967	13707395	1429	-	WBGene00011327	hlh-34	protein_coding
V	15111960	15113638	1679	+	WBGene00011342	T01G5.7	protein_coding
V	11294693	11296562	1870	+	WBGene00011403	T03F7.6	protein_coding
V	11311422	11313445	2024	+	WBGene00011404	T03F7.7	protein_coding
V	11068047	11069358	1312	-	WBGene00011430	T04C12.8	protein_coding
V	11758935	11760580	1646	+	WBGene00011438	T04F3.3	protein_coding
V	15926425	15928425	2001	-	WBGene00011505	pzf-1	protein_coding
V	15867673	15869051	1379	+	WBGene00011513	fbxa-197	protein_coding
V	9626396	9628345	1950	+	WBGene00011534	T06E4.7	protein_coding
V	15393108	15394961	1854	-	WBGene00011538	T06E6.1	protein_coding
V	15418122	15419401	1280	+	WBGene00011540	T06E6.10	protein_coding
V	15411433	15412725	1293	-	WBGene00011541	srbc-63	protein_coding
V	9944393	9945895	1503	+	WBGene00011570	sre-28	protein_coding
V	9956879	9958331	1453	-	WBGene00011573	anmt-3	protein_coding
V	9960747	9962494	1748	-	WBGene00011575	madf-4	protein_coding
V	16448035	16449374	1340	+	WBGene00011621	T08G3.13	protein_coding
V	14018766	14020388	1623	+	WBGene00011622	T08G5.1	protein_coding
V	14024768	14026294	1527	-	WBGene00011623	T08G5.2	protein_coding
V	15149100	15150733	1634	+	WBGene00011665	T09F5.1	protein_coding
V	15180057	15181843	1787	+	WBGene00011669	T09F5.10	protein_coding
V	15182440	15184132	1693	+	WBGene00011670	fbxa-84	protein_coding
V	16036413	16038334	1922	+	WBGene00011691	T10C6.10	protein_coding
V	9866628	9868411	1784	-	WBGene00011701	srab-17	protein_coding
V	9869887	9871439	1553	-	WBGene00011702	srab-18	protein_coding
V	11486980	11488290	1311	+	WBGene00011712	T11F9.10	protein_coding
V	16265053	16266614	1562	-	WBGene00011751	T13F3.4	protein_coding
V	16268001	16269656	1656	-	WBGene00011752	fbxa-2	protein_coding
V	14213552	14215206	1655	-	WBGene00011795	T16A9.5	protein_coding
V	12940141	12941847	1707	-	WBGene00011798	T16G1.4	protein_coding
V	12937574	12939552	1979	-	WBGene00011799	T16G1.5	protein_coding
V	12935538	12937174	1637	-	WBGene00011800	T16G1.6	protein_coding
V	11221302	11222834	1533	+	WBGene00011831	T19B10.2	protein_coding
V	11237432	11239331	1900	-	WBGene00011834	dvc-1	protein_coding
V	11149705	11151323	1619	+	WBGene00011838	T19C4.1	protein_coding
V	17239097	17240721	1625	+	WBGene00011844	T19C9.8	protein_coding
V	16848611	16850199	1589	+	WBGene00011852	clec-26	protein_coding
V	16839121	16841061	1941	-	WBGene00011853	clec-40	protein_coding
V	10576510	10578326	1817	-	WBGene00011890	mics-1	protein_coding
V	10597266	10598666	1401	+	WBGene00011898	T21C9.13	protein_coding
V	13876829	13878052	1224	+	WBGene00011929	T22G5.1	protein_coding
V	13887658	13889662	2005	+	WBGene00011931	srsx-19	protein_coding
V	16735765	16737445	1681	+	WBGene00012023	clec-34	protein_coding
V	16737765	16739200	1436	-	WBGene00012024	clec-29	protein_coding
V	16733821	16735618	1798	-	WBGene00012025	clec-38	protein_coding
V	16731900	16733147	1248	+	WBGene00012026	srz-100	protein_coding
V	16728731	16729960	1230	+	WBGene00012027	fbxa-127	protein_coding
V	15779679	15781247	1569	+	WBGene00012043	irld-52	protein_coding
V	15782794	15784470	1677	+	WBGene00012045	T26E4.3	protein_coding
V	15793570	15795194	1625	+	WBGene00012049	T26E4.7	protein_coding
V	15805910	15807520	1611	-	WBGene00012054	srsx-38	protein_coding
V	15808119	15809643	1525	-	WBGene00012055	srsx-36	protein_coding
V	15777718	15779228	1511	-	WBGene00012056	nhr-285	protein_coding
V	13974563	13976550	1988	+	WBGene00012057	T26F2.1	protein_coding
V	19240354	19241710	1357	+	WBGene00012063	fbxb-1	protein_coding
V	19238421	19240229	1809	-	WBGene00012064	fbxb-115	protein_coding
V	19235995	19237304	1310	-	WBGene00012065	fbxb-2	protein_coding
V	19233769	19235661	1893	+	WBGene00012066	fbxb-116	protein_coding
V	19230782	19232020	1239	+	WBGene00012067	sqst-3	protein_coding
V	17417133	17418437	1305	+	WBGene00012081	T27C5.8	protein_coding
V	12503794	12505146	1353	+	WBGene00012142	T28H10.1	protein_coding
V	12513056	12514941	1886	+	WBGene00012144	lgmn-1	protein_coding
V	12505059	12506285	1227	-	WBGene00012145	nlp-46	protein_coding
V	20660325	20662037	1713	+	WBGene00012185	W01F3.2	protein_coding
V	12493239	12494622	1384	-	WBGene00012244	mrps-11	protein_coding
V	19739556	19741134	1579	-	WBGene00012247	W04E12.2	protein_coding
V	12668226	12669689	1464	+	WBGene00012279	W05B10.4	protein_coding
V	20734958	20736180	1223	+	WBGene00012321	srxa-6	protein_coding
V	13034895	13036566	1672	-	WBGene00012336	W07G4.2	protein_coding
V	13047980	13049236	1257	+	WBGene00012339	W07G4.5	protein_coding
V	15719870	15721292	1423	+	WBGene00012400	Y6E2A.7	protein_coding
V	15724810	15726710	1901	-	WBGene00012401	irld-57	protein_coding
V	15726841	15728358	1518	+	WBGene00012402	sfxn-1.3	protein_coding
V	17608097	17609597	1501	+	WBGene00012406	srz-91	protein_coding
V	18787739	18789653	1915	+	WBGene00012450	Y17D7B.2	protein_coding
V	18784954	18786794	1841	-	WBGene00012451	Y17D7B.3	protein_coding
V	18706570	18708550	1981	+	WBGene00012455	Y17D7C.1	protein_coding
V	17377406	17379233	1828	+	WBGene00012492	fbxb-7	protein_coding
V	16550980	16552282	1303	+	WBGene00012523	srbc-65	protein_coding
V	16606613	16608530	1918	+	WBGene00012525	Y32B12C.1	protein_coding
V	18123939	18125235	1297	+	WBGene00012564	fbxa-107	protein_coding
V	18125375	18127205	1831	+	WBGene00012565	fbxa-210	protein_coding
V	18127519	18128888	1370	+	WBGene00012566	fbxa-211	protein_coding
V	18138995	18140687	1693	+	WBGene00012570	Y37H2A.10	protein_coding
V	18267292	18268844	1553	-	WBGene00012574	fbxa-213	protein_coding
V	18270703	18272256	1554	+	WBGene00012575	Y37H2C.4	protein_coding
V	20513961	20515732	1772	+	WBGene00012621	Y38H6C.8	protein_coding
V	20520380	20522270	1891	-	WBGene00012622	Y38H6C.9	protein_coding
V	20522598	20524512	1915	+	WBGene00012624	fbxa-150	protein_coding
V	20527793	20529260	1468	+	WBGene00012625	Y38H6C.13	protein_coding
V	20534746	20536308	1563	-	WBGene00012627	Y38H6C.15	protein_coding
V	19157659	19158877	1219	-	WBGene00012668	Y39B6A.5	protein_coding
V	19043215	19044853	1639	-	WBGene00012681	asp-15	protein_coding
V	19035723	19037322	1600	-	WBGene00012683	asp-17	protein_coding
V	18967905	18969640	1736	-	WBGene00012700	Y39B6A.42	protein_coding
V	19512185	19513652	1468	-	WBGene00012815	phy-4	protein_coding
V	19470685	19472521	1837	+	WBGene00012821	Y43F8B.11	protein_coding
V	19455950	19457372	1423	+	WBGene00012823	Y43F8B.13	protein_coding
V	19631371	19632646	1276	-	WBGene00012827	Y43F8C.5	protein_coding
V	19644239	19645676	1438	+	WBGene00012830	mrps-28	protein_coding
V	19646105	19647338	1234	+	WBGene00012831	Y43F8C.9	protein_coding
V	19714132	19715519	1388	-	WBGene00012837	Y43F8C.16	protein_coding
V	19716147	19717577	1431	+	WBGene00012838	Y43F8C.17	protein_coding
V	20639594	20641049	1456	+	WBGene00012846	srxa-14	protein_coding
V	20636864	20638444	1581	-	WBGene00012848	Y44A6B.3	protein_coding
V	20722234	20723789	1556	+	WBGene00012851	Y44A6C.2	protein_coding
V	20789502	20790784	1283	+	WBGene00012853	Y44A6D.2	protein_coding
V	20790768	20792421	1654	-	WBGene00012854	Y44A6D.3	protein_coding
V	20801184	20803006	1823	-	WBGene00012855	Y44A6D.5	protein_coding
V	14354410	14355741	1332	+	WBGene00013026	Y49A3A.3	protein_coding
V	14778203	14779744	1542	-	WBGene00013052	scrm-7	protein_coding
V	14782650	14784210	1561	-	WBGene00013055	Y50E8A.12	protein_coding
V	18298806	18300713	1908	+	WBGene00013061	Y51A2A.5	protein_coding
V	18555387	18556643	1257	-	WBGene00013077	ttr-24	protein_coding
V	18556714	18558099	1386	+	WBGene00013078	ttr-25	protein_coding
V	18558758	18560288	1531	-	WBGene00013079	ttr-26	protein_coding
V	20007770	20009195	1426	+	WBGene00013367	Y60A3A.23	protein_coding
V	17190831	17192338	1508	-	WBGene00013466	srz-47	protein_coding
V	17247215	17249015	1801	-	WBGene00013470	clec-243	protein_coding
V	17243598	17245506	1909	-	WBGene00013471	clec-242	protein_coding
V	18699451	18700992	1542	+	WBGene00013483	nhr-241	protein_coding
V	16621396	16623211	1816	-	WBGene00013490	Y70C5A.2	protein_coding
V	16705044	16706649	1606	-	WBGene00013493	clec-9	protein_coding
V	15187888	15189588	1701	+	WBGene00013569	bath-36	protein_coding
V	18874133	18875982	1850	+	WBGene00013583	ceh-51	protein_coding
V	16854633	16856323	1691	+	WBGene00013607	clec-27	protein_coding
V	16852267	16854056	1790	-	WBGene00013608	clec-35	protein_coding
V	16850394	16852102	1709	-	WBGene00013609	clec-37	protein_coding
V	16917201	16918478	1278	-	WBGene00013610	fbxa-206	protein_coding
V	16956529	16958077	1549	+	WBGene00013621	clec-239	protein_coding
V	16951804	16953629	1826	+	WBGene00013622	clec-238	protein_coding
V	16966814	16968586	1773	+	WBGene00013623	fbxa-90	protein_coding
V	16992034	16993910	1877	+	WBGene00013629	srz-95	protein_coding
V	20037587	20039447	1861	+	WBGene00013753	Y113G7A.16	protein_coding
V	20187657	20188890	1234	-	WBGene00013754	fbxa-116	protein_coding
V	20190535	20192152	1618	-	WBGene00013755	fbxa-115	protein_coding
V	20196971	20198241	1271	+	WBGene00013756	ftr-1	protein_coding
V	20201616	20202874	1259	+	WBGene00013758	fbxa-114	protein_coding
V	20204524	20206186	1663	-	WBGene00013759	fbxb-59	protein_coding
V	20206318	20207907	1590	+	WBGene00013760	srbc-34	protein_coding
V	20213823	20215297	1475	-	WBGene00013761	Y113G7B.11	protein_coding
V	19730580	19732242	1663	+	WBGene00013816	Y116F11A.1	protein_coding
V	20303588	20304908	1321	+	WBGene00013832	ZC15.3	protein_coding
V	20297950	20299524	1575	+	WBGene00013833	ZC15.5	protein_coding
V	14178079	14179628	1550	+	WBGene00013876	ceh-74	protein_coding
V	14180247	14181548	1302	+	WBGene00013879	ZC376.8	protein_coding
V	14874122	14875471	1350	-	WBGene00013886	ZC412.5	protein_coding
V	12808422	12810080	1659	-	WBGene00013896	ZC443.1	protein_coding
V	12812296	12814122	1827	-	WBGene00013898	ZC443.3	protein_coding
V	12798308	12800271	1964	-	WBGene00013903	ugt-3	protein_coding
V	12783041	12784961	1921	-	WBGene00013907	sre-20	protein_coding
V	12789197	12790518	1322	-	WBGene00013908	srbc-43	protein_coding
V	12787269	12788551	1283	-	WBGene00013909	srbc-44	protein_coding
V	17098854	17100405	1552	+	WBGene00013938	ZK218.4	protein_coding
V	17103410	17104627	1218	-	WBGene00013940	nhr-248	protein_coding
V	18438381	18440195	1815	+	WBGene00013953	ZK262.8	protein_coding
V	18439769	18441625	1857	+	WBGene00013954	ZK262.9	protein_coding
V	9693062	9694785	1724	+	WBGene00013967	ZK287.7	protein_coding
V	18732798	18734481	1684	-	WBGene00013972	scl-20	protein_coding
V	18730174	18731679	1506	-	WBGene00013973	asp-18	protein_coding
V	12194565	12195945	1381	-	WBGene00014099	ZK836.3	protein_coding
V	10183284	10184529	1246	+	WBGene00014105	ZK856.4	protein_coding
V	10198686	10200204	1519	+	WBGene00014107	ZK856.6	protein_coding
V	12179497	12181410	1914	-	WBGene00014123	elpc-3	protein_coding
V	15311080	15312536	1457	+	WBGene00014190	irld-62	protein_coding
V	15314668	15315927	1260	-	WBGene00014191	srt-22	protein_coding
V	15325812	15327795	1984	-	WBGene00014194	ZK1037.6	protein_coding
V	15307558	15309098	1541	-	WBGene00014195	srz-10	protein_coding
V	17540595	17542272	1678	+	WBGene00014679	srz-25	protein_coding
V	11836391	11838020	1630	+	WBGene00014826	R13H4.2	protein_coding
V	3955701	3957708	2008	-	WBGene00015040	cyp-34A5	protein_coding
V	5250604	5252116	1513	-	WBGene00015068	srt-68	protein_coding
V	5256142	5257458	1317	-	WBGene00015069	srt-67	protein_coding
V	5258036	5259548	1513	-	WBGene00015070	srt-70	protein_coding
V	5263948	5265681	1734	-	WBGene00015072	srt-69	protein_coding
V	5274070	5275615	1546	+	WBGene00015074	natc-2	protein_coding
V	5269485	5270744	1260	+	WBGene00015075	B0238.11	protein_coding
V	45310	46924	1615	+	WBGene00015152	B0348.2	protein_coding
V	8768909	8770873	1965	+	WBGene00015220	B0507.3	protein_coding
V	8757312	8758718	1407	-	WBGene00015224	B0507.7	protein_coding
V	8758820	8760516	1697	-	WBGene00015227	ddn-1	protein_coding
V	422433	424177	1745	+	WBGene00015259	dod-20	protein_coding
V	2501051	2502426	1376	+	WBGene00015270	C01B4.6	protein_coding
V	3469445	3470882	1438	-	WBGene00015315	srbc-29	protein_coding
V	3485549	3486957	1409	-	WBGene00015317	srbc-32	protein_coding
V	3489228	3490535	1308	-	WBGene00015318	srbc-36	protein_coding
V	7388390	7389871	1482	-	WBGene00015361	C02H6.1	protein_coding
V	7390529	7392029	1501	-	WBGene00015362	fbxa-105	protein_coding
V	5181912	5183717	1806	+	WBGene00015366	C03A7.2	protein_coding
V	5168279	5169686	1408	-	WBGene00015367	srt-64	protein_coding
V	5170914	5172933	2020	-	WBGene00015368	srt-65	protein_coding
V	7357432	7358976	1545	+	WBGene00015394	C03G6.6	protein_coding
V	7342156	7343838	1683	+	WBGene00015396	nhr-148	protein_coding
V	7348211	7349641	1431	-	WBGene00015397	nhr-149	protein_coding
V	7359929	7361773	1845	-	WBGene00015399	cyp-35A1	protein_coding
V	7362319	7364182	1864	-	WBGene00015400	cyp-35A2	protein_coding
V	7377897	7379484	1588	-	WBGene00015401	srsx-24	protein_coding
V	7379745	7381108	1364	-	WBGene00015402	C03G6.17	protein_coding
V	5922536	5924297	1762	+	WBGene00015419	srsx-18	protein_coding
V	5893315	5895203	1889	+	WBGene00015423	C04E6.7	protein_coding
V	5882563	5883835	1273	-	WBGene00015424	C04E6.8	protein_coding
V	5918060	5919987	1928	-	WBGene00015426	C04E6.12	protein_coding
V	3368073	3369922	1850	+	WBGene00015433	C04E12.2	protein_coding
V	3355848	3357206	1359	-	WBGene00015437	scrm-3	protein_coding
V	5100098	5102117	2020	-	WBGene00015446	srab-1	protein_coding
V	5103042	5105034	1993	-	WBGene00015447	srab-2	protein_coding
V	7239771	7241366	1596	+	WBGene00015460	C05C8.1	protein_coding
V	7231190	7232689	1500	+	WBGene00015461	krr-1	protein_coding
V	5985436	5986855	1420	-	WBGene00015679	C10F3.7	protein_coding
V	5312753	5314356	1604	+	WBGene00015682	C10G8.3	protein_coding
V	7686350	7688228	1879	+	WBGene00015705	nhr-152	protein_coding
V	7688193	7689988	1796	-	WBGene00015710	C12D5.9	protein_coding
V	7692059	7693494	1436	-	WBGene00015711	C12D5.10	protein_coding
V	7262561	7264142	1582	-	WBGene00015725	C13A2.9	protein_coding
V	7273859	7275092	1234	-	WBGene00015726	C13A2.10	protein_coding
V	4977934	4979160	1227	-	WBGene00015736	srsx-11	protein_coding
V	4981809	4983191	1383	-	WBGene00015738	srsx-13	protein_coding
V	7219115	7221039	1925	-	WBGene00015745	C13F10.6	protein_coding
V	563134	564446	1313	+	WBGene00015756	C14C6.2	protein_coding
V	543469	545359	1891	+	WBGene00015757	C14C6.3	protein_coding
V	539460	541485	2026	+	WBGene00015758	nhr-155	protein_coding
V	551279	553167	1889	-	WBGene00015762	C14C6.8	protein_coding
V	5663617	5665264	1648	+	WBGene00015765	C14C11.1	protein_coding
V	8259316	8261315	2000	+	WBGene00015857	C16D9.1	protein_coding
V	8240920	8242898	1979	-	WBGene00015859	C16D9.4	protein_coding
V	8243679	8245557	1879	-	WBGene00015860	C16D9.5	protein_coding
V	3330890	3332123	1234	-	WBGene00015883	C17B7.9	protein_coding
V	3340175	3342006	1832	-	WBGene00015884	C17B7.10	protein_coding
V	3892854	3894573	1720	+	WBGene00015899	C17E7.4	protein_coding
V	3889161	3890861	1701	-	WBGene00015903	C17E7.9	protein_coding
V	3898800	3900202	1403	-	WBGene00015904	irld-22	protein_coding
V	3887563	3889288	1726	-	WBGene00015906	C17E7.13	protein_coding
V	7493880	7495289	1410	-	WBGene00015958	srbc-11	protein_coding
V	7489134	7490440	1307	-	WBGene00015960	srbc-9	protein_coding
V	7486131	7487618	1488	-	WBGene00015961	srbc-7	protein_coding
V	7483332	7485100	1769	-	WBGene00015962	srbc-8	protein_coding
V	7479203	7481049	1847	-	WBGene00015963	C18B10.6	protein_coding
V	4767886	4769733	1848	-	WBGene00015987	C18G1.9	protein_coding
V	9195817	9197326	1510	-	WBGene00016046	C24B5.4	protein_coding
V	2712028	2713632	1605	-	WBGene00016049	srt-28	protein_coding
V	2717395	2719135	1741	-	WBGene00016050	srt-29	protein_coding
V	5534118	5535874	1757	-	WBGene00016062	C24G6.8	protein_coding
V	5408523	5410132	1610	+	WBGene00016081	C25A6.1	protein_coding
V	9045171	9046965	1795	+	WBGene00016091	nhr-30	protein_coding
V	9049978	9051200	1223	-	WBGene00016096	C25E10.7	protein_coding
V	9060475	9062441	1967	-	WBGene00016101	C25E10.12	protein_coding
V	7777300	7778920	1621	+	WBGene00016148	C26F1.3	protein_coding
V	7771261	7773269	2009	+	WBGene00016149	frpr-3	protein_coding
V	2577903	2579816	1914	+	WBGene00016232	srt-4	protein_coding
V	2574181	2575410	1230	+	WBGene00016233	nhr-290	protein_coding
V	2931552	2933005	1454	+	WBGene00016279	C31B8.1	protein_coding
V	2896610	2898527	1918	+	WBGene00016281	pals-32	protein_coding
V	2911082	2913001	1920	-	WBGene00016284	C31B8.9	protein_coding
V	7004150	7005865	1716	+	WBGene00016363	srab-4	protein_coding
V	6986132	6987773	1642	-	WBGene00016365	nhr-139	protein_coding
V	6987864	6989676	1813	-	WBGene00016366	nhr-140	protein_coding
V	6990145	6991871	1727	-	WBGene00016367	nhr-162	protein_coding
V	7014405	7015972	1568	-	WBGene00016369	C33G8.13	protein_coding
V	3176461	3177978	1518	+	WBGene00016471	srab-8	protein_coding
V	3170138	3171408	1271	+	WBGene00016472	srbc-6	protein_coding
V	3139931	3141290	1360	-	WBGene00016475	srab-9	protein_coding
V	3143094	3144594	1501	-	WBGene00016476	srab-10	protein_coding
V	3145203	3147032	1830	-	WBGene00016477	srab-11	protein_coding
V	3150488	3151962	1475	-	WBGene00016479	srab-6	protein_coding
V	3153485	3155172	1688	-	WBGene00016480	srab-7	protein_coding
V	7857963	7859916	1954	+	WBGene00016495	C37C3.1	protein_coding
V	7855944	7857948	2005	+	WBGene00016496	C37C3.2	protein_coding
V	7835220	7837134	1915	-	WBGene00016499	txt-5	protein_coding
V	7863453	7864763	1311	-	WBGene00016503	C37C3.11	protein_coding
V	1509879	1511637	1759	-	WBGene00016517	nhr-260	protein_coding
V	2177714	2179116	1403	+	WBGene00016687	srbc-17	protein_coding
V	2151758	2153092	1335	+	WBGene00016692	srbc-24	protein_coding
V	2147095	2148626	1532	+	WBGene00016693	srbc-20	protein_coding
V	2164788	2166779	1992	-	WBGene00016696	srbc-19	protein_coding
V	4042181	4043601	1421	+	WBGene00016783	irg-2	protein_coding
V	4034476	4036025	1550	+	WBGene00016785	C49G7.7	protein_coding
V	4031619	4033446	1828	+	WBGene00016786	cyp-35A4	protein_coding
V	4040409	4042021	1613	-	WBGene00016788	C49G7.10	protein_coding
V	7610370	7611905	1536	+	WBGene00016813	clec-214	protein_coding
V	7588530	7590554	2025	-	WBGene00016817	C50E3.6	protein_coding
V	7598994	7600249	1256	-	WBGene00016820	C50E3.9	protein_coding
V	7602256	7603486	1231	-	WBGene00016822	C50E3.11	protein_coding
V	7620504	7622061	1558	-	WBGene00016823	C50E3.12	protein_coding
V	7622327	7624252	1926	-	WBGene00016824	C50E3.13	protein_coding
V	3086560	3087986	1427	+	WBGene00016850	srt-8	protein_coding
V	3081771	3083247	1477	+	WBGene00016852	srt-7	protein_coding
V	3054554	3055908	1355	+	WBGene00016855	C50H11.8	protein_coding
V	3063160	3064518	1359	-	WBGene00016857	srt-16	protein_coding
V	3069925	3071648	1724	-	WBGene00016858	C50H11.13	protein_coding
V	3079449	3080892	1444	-	WBGene00016859	srt-5	protein_coding
V	5758792	5760232	1441	-	WBGene00016891	C53A3.1	protein_coding
V	5762494	5763846	1353	-	WBGene00016892	pgph-3	protein_coding
V	7533247	7535074	1828	+	WBGene00016921	C54F6.3	protein_coding
V	7530140	7531494	1355	+	WBGene00016922	swt-2	protein_coding
V	7511765	7513726	1962	+	WBGene00016926	nhr-171	protein_coding
V	7508994	7510779	1786	+	WBGene00016927	nhr-172	protein_coding
V	7536738	7538118	1381	-	WBGene00016929	C54F6.12	protein_coding
V	8143905	8145649	1745	+	WBGene00017015	D1014.2	protein_coding
V	8133226	8134988	1763	+	WBGene00017017	D1014.4	protein_coding
V	4327121	4329083	1963	+	WBGene00017060	D2063.1	protein_coding
V	9369477	9371086	1610	-	WBGene00017092	E02C12.6	protein_coding
V	9373954	9375478	1525	-	WBGene00017094	E02C12.9	protein_coding
V	9376747	9378409	1663	-	WBGene00017095	E02C12.10	protein_coding
V	4240952	4242531	1580	-	WBGene00017107	srt-12	protein_coding
V	6578185	6580122	1938	-	WBGene00017151	EGAP9.3	protein_coding
V	8872277	8873535	1259	+	WBGene00017185	F07B7.1	protein_coding
V	8870259	8872003	1745	+	WBGene00017186	F07B7.2	protein_coding
V	9226094	9227625	1532	+	WBGene00017193	F07C3.2	protein_coding
V	7624952	7626447	1496	+	WBGene00017201	grsp-4	protein_coding
V	5431303	5432599	1297	-	WBGene00017264	F08F3.8	protein_coding
V	5413355	5415073	1719	+	WBGene00017266	F08F3.10	protein_coding
V	7196916	7198437	1522	+	WBGene00017311	F09G2.2	protein_coding
V	7132548	7133856	1309	+	WBGene00017330	sre-10	protein_coding
V	7145656	7147470	1815	-	WBGene00017333	ugt-38	protein_coding
V	7154503	7156179	1677	-	WBGene00017335	F10D2.10	protein_coding
V	7328392	7330002	1611	+	WBGene00017364	clec-7	protein_coding
V	7335866	7337318	1453	-	WBGene00017366	F10G2.7	protein_coding
V	7340403	7342042	1640	-	WBGene00017367	nhr-263	protein_coding
V	4398634	4400218	1585	-	WBGene00017413	F13A2.4	protein_coding
V	2334489	2336251	1763	-	WBGene00017491	irld-28	protein_coding
V	2336678	2338638	1961	-	WBGene00017492	irld-29	protein_coding
V	2339540	2341385	1846	-	WBGene00017493	irld-30	protein_coding
V	1612803	1614826	2024	-	WBGene00017511	srbc-41	protein_coding
V	6105607	6107530	1924	+	WBGene00017535	atf-8	protein_coding
V	6108964	6110629	1666	-	WBGene00017536	F17A9.4	protein_coding
V	6118333	6120206	1874	-	WBGene00017538	ceh-49	protein_coding
V	7420462	7421713	1252	+	WBGene00017564	srxa-4	protein_coding
V	7557470	7558793	1324	-	WBGene00017601	ets-7	protein_coding
V	7017359	7018851	1493	+	WBGene00017615	srsx-32	protein_coding
V	7049434	7051248	1815	-	WBGene00017620	tofu-2	protein_coding
V	8190730	8192050	1321	+	WBGene00017633	F20D6.1	protein_coding
V	8186037	8187397	1361	+	WBGene00017634	F20D6.2	protein_coding
V	8159929	8161643	1715	+	WBGene00017636	F20D6.6	protein_coding
V	9097201	9098696	1496	-	WBGene00017658	F21C10.9	protein_coding
V	9099592	9101162	1571	-	WBGene00017661	frpr-6	protein_coding
V	1179579	1181597	2019	+	WBGene00017764	F25A2.1	protein_coding
V	5712928	5714737	1810	+	WBGene00017765	gcst-1	protein_coding
V	5682721	5684589	1869	-	WBGene00017769	hmgs-1	protein_coding
V	5685732	5687226	1495	-	WBGene00017770	F25B4.7	protein_coding
V	5690103	5691715	1613	-	WBGene00017771	F25B4.8	protein_coding
V	7451721	7452951	1231	+	WBGene00017784	F25E5.3	protein_coding
V	7449353	7451180	1828	+	WBGene00017785	F25E5.4	protein_coding
V	7447265	7449080	1816	+	WBGene00017786	F25E5.5	protein_coding
V	7440107	7441522	1416	+	WBGene00017788	F25E5.7	protein_coding
V	7452912	7454336	1425	-	WBGene00017791	try-8	protein_coding
V	7438285	7439998	1714	+	WBGene00017792	F25E5.16	protein_coding
V	7959270	7960958	1689	+	WBGene00017819	F26D11.2	protein_coding
V	7951594	7952955	1362	-	WBGene00017822	clec-216	protein_coding
V	7957277	7958840	1564	-	WBGene00017824	clec-217	protein_coding
V	5863962	5865185	1224	-	WBGene00017836	F26F12.5	protein_coding
V	4975478	4977502	2025	+	WBGene00017843	F26G5.1	protein_coding
V	4971770	4973043	1274	-	WBGene00017845	srsx-9	protein_coding
V	8641602	8643193	1592	-	WBGene00017881	asp-13	protein_coding
V	6039101	6040582	1482	+	WBGene00017930	F29G9.1	protein_coding
V	662423	664437	2015	-	WBGene00017960	F31F4.11	protein_coding
V	665919	667510	1592	-	WBGene00017961	nhr-180	protein_coding
V	674886	676753	1868	-	WBGene00017962	fbxa-72	protein_coding
V	658476	660310	1835	-	WBGene00017963	F31F4.17	protein_coding
V	6276439	6278160	1722	+	WBGene00017964	F31F7.1	protein_coding
V	3316307	3317851	1545	+	WBGene00018052	F35F10.1	protein_coding
V	3308469	3309689	1221	+	WBGene00018053	srbc-3	protein_coding
V	3287968	3289367	1400	-	WBGene00018056	F35F10.6	protein_coding
V	3310123	3312117	1995	-	WBGene00018060	arrd-18	protein_coding
V	9400327	9401855	1529	+	WBGene00018088	trpp-4	protein_coding
V	2884711	2886425	1715	+	WBGene00018139	sre-24	protein_coding
V	2875734	2877609	1876	-	WBGene00018140	F37B4.10	protein_coding
V	8376149	8377944	1796	+	WBGene00018178	F38E1.3	protein_coding
V	8351671	8353085	1415	+	WBGene00018180	srsx-22	protein_coding
V	8373964	8375519	1556	-	WBGene00018182	F38E1.10	protein_coding
V	4081228	4083052	1825	-	WBGene00018190	F38H12.5	protein_coding
V	4724753	4726726	1974	+	WBGene00018209	F39G3.4	protein_coding
V	4722614	4724621	2008	+	WBGene00018210	F39G3.5	protein_coding
V	7892118	7893862	1745	-	WBGene00018221	F40A3.6	protein_coding
V	3572708	3574157	1450	+	WBGene00018228	F40C5.1	protein_coding
V	2245004	2247029	2026	+	WBGene00018261	cyp-33C5	protein_coding
V	8603480	8605469	1990	+	WBGene00018286	F41E6.5	protein_coding
V	8597497	8599292	1796	-	WBGene00018288	F41E6.7	protein_coding
V	8619925	8621313	1389	-	WBGene00018292	F41E6.11	protein_coding
V	833668	835504	1837	+	WBGene00018312	F41H8.1	protein_coding
V	8023195	8024940	1746	-	WBGene00018399	F43H9.3	protein_coding
V	9303326	9304622	1297	+	WBGene00018404	nhr-39	protein_coding
V	9321485	9322929	1445	+	WBGene00018406	F44A2.7	protein_coding
V	2236140	2237999	1860	+	WBGene00018413	cyp-33C4	protein_coding
V	2212871	2214478	1608	-	WBGene00018415	nhr-184	protein_coding
V	5781317	5782787	1471	-	WBGene00018428	fbxa-183	protein_coding
V	8518934	8520896	1963	-	WBGene00018483	F45F2.11	protein_coding
V	6515283	6516526	1244	-	WBGene00018491	mdh-1	protein_coding
V	3860939	3862951	2013	-	WBGene00018542	nhr-187	protein_coding
V	3856296	3857861	1566	-	WBGene00018544	nhr-188	protein_coding
V	3858435	3860243	1809	-	WBGene00018545	nhr-189	protein_coding
V	4266375	4268313	1939	-	WBGene00018556	srt-36	protein_coding
V	4269455	4271358	1904	-	WBGene00018557	srt-38	protein_coding
V	4279848	4281799	1952	-	WBGene00018559	srt-37	protein_coding
V	623298	625022	1725	-	WBGene00018617	srt-17	protein_coding
V	615575	617166	1592	+	WBGene00018624	F48G7.13	protein_coding
V	8410595	8411831	1237	+	WBGene00018692	F52E1.2	protein_coding
V	8394800	8396269	1470	+	WBGene00018693	F52E1.3	protein_coding
V	8411775	8413482	1708	-	WBGene00018698	vha-18	protein_coding
V	4616151	4617777	1627	+	WBGene00018814	F54D11.4	protein_coding
V	2810398	2812017	1620	+	WBGene00018823	F54E2.1	protein_coding
V	2814124	2816056	1933	-	WBGene00018825	F54E2.5	protein_coding
V	2816883	2818217	1335	-	WBGene00018826	srt-34	protein_coding
V	2459637	2460893	1257	+	WBGene00018910	F56A4.2	protein_coding
V	2447895	2449136	1242	+	WBGene00018912	F56A4.4	protein_coding
V	2437960	2439871	1912	+	WBGene00018913	F56A4.5	protein_coding
V	2022674	2024695	2022	+	WBGene00019092	F59A7.5	protein_coding
V	2012077	2013398	1322	+	WBGene00019094	F59A7.7	protein_coding
V	2004959	2006805	1847	+	WBGene00019096	cysl-4	protein_coding
V	3633341	3634678	1338	+	WBGene00019097	F59B1.2	protein_coding
V	3028285	3029631	1347	+	WBGene00019104	asp-7	protein_coding
V	3037812	3039382	1571	-	WBGene00019108	chpf-2	protein_coding
V	9001475	9003194	1720	+	WBGene00019109	F59E11.2	protein_coding
V	8995101	8996657	1557	+	WBGene00019111	F59E11.5	protein_coding
V	8991789	8993173	1385	+	WBGene00019112	F59E11.6	protein_coding
V	8990244	8991664	1421	+	WBGene00019113	F59E11.7	protein_coding
V	8970691	8972371	1681	-	WBGene00019115	nhr-195	protein_coding
V	8973014	8974939	1926	-	WBGene00019116	nhr-143	protein_coding
V	3815214	3816864	1651	+	WBGene00019177	H10D18.1	protein_coding
V	8932618	8934327	1710	+	WBGene00019202	H14N18.2	protein_coding
V	4903930	4905942	2013	+	WBGene00019234	ugt-8	protein_coding
V	4901374	4903272	1899	+	WBGene00019235	H23N18.4	protein_coding
V	722646	723952	1307	-	WBGene00019243	fbxb-72	protein_coding
V	6804512	6806440	1929	-	WBGene00019262	dmsr-12	protein_coding
V	1535224	1537079	1856	-	WBGene00019350	K02H11.9	protein_coding
V	4687994	4689234	1241	+	WBGene00019354	K03B4.2	protein_coding
V	6550171	6552186	2016	+	WBGene00019376	lipl-4	protein_coding
V	1662570	1664580	2011	+	WBGene00019389	irld-40	protein_coding
V	588118	589657	1540	+	WBGene00019449	K06H6.1	protein_coding
V	585772	587336	1565	+	WBGene00019450	K06H6.2	protein_coding
V	581916	583431	1516	+	WBGene00019451	nstp-7	protein_coding
V	9345022	9346962	1941	-	WBGene00019467	K07B1.7	protein_coding
V	3945353	3947044	1692	+	WBGene00019470	cyp-35B3	protein_coding
V	6259367	6260784	1418	+	WBGene00019520	K08B12.1	protein_coding
V	3198544	3200423	1880	-	WBGene00019525	K08D9.4	protein_coding
V	849812	851332	1521	+	WBGene00019558	srbc-12	protein_coding
V	853436	855066	1631	-	WBGene00019563	K09C6.9	protein_coding
V	4022609	4024482	1874	+	WBGene00019565	cyp-35A3	protein_coding
V	3992628	3994148	1521	-	WBGene00019567	K09D9.9	protein_coding
V	5734619	5736168	1550	-	WBGene00019603	K09H11.6	protein_coding
V	1065682	1067568	1887	-	WBGene00019626	K10C9.7	protein_coding
V	6897000	6898497	1498	+	WBGene00019642	K11C4.1	protein_coding
V	6895078	6896922	1845	+	WBGene00019643	K11C4.2	protein_coding
V	5029319	5030815	1497	-	WBGene00019645	swt-7	protein_coding
V	5039455	5041001	1547	-	WBGene00019648	K11D12.8	protein_coding
V	5052261	5053490	1230	+	WBGene00019651	K11D12.12	protein_coding
V	3014485	3016049	1565	+	WBGene00019675	K12D9.1	protein_coding
V	472889	474631	1743	+	WBGene00019740	srt-31	protein_coding
V	5618259	5620140	1882	-	WBGene00019757	memb-2	protein_coding
V	6051377	6053238	1862	-	WBGene00019808	seip-1	protein_coding
V	236686	238194	1509	-	WBGene00019814	R02C2.1	protein_coding
V	244406	246197	1792	-	WBGene00019815	kin-34	protein_coding
V	238902	240500	1599	-	WBGene00019817	txt-2	protein_coding
V	241326	242618	1293	-	WBGene00019818	R02C2.7	protein_coding
V	4801094	4802681	1588	+	WBGene00019839	R02F11.1	protein_coding
V	9014408	9015640	1233	-	WBGene00019850	srt-18	protein_coding
V	2761819	2763208	1390	-	WBGene00019885	R05D8.7	protein_coding
V	2766232	2767565	1334	-	WBGene00019886	R05D8.9	protein_coding
V	2779206	2780886	1681	-	WBGene00019887	R05D8.11	protein_coding
V	3769798	3771518	1721	-	WBGene00019961	R08E5.1	protein_coding
V	3774536	3776136	1601	-	WBGene00019962	cysl-3	protein_coding
V	3768570	3769870	1301	+	WBGene00019964	R08E5.4	protein_coding
V	3803839	3805527	1689	-	WBGene00019968	R08F11.4	protein_coding
V	1460369	1461613	1245	+	WBGene00019978	hacd-1	protein_coding
V	1455062	1456646	1585	+	WBGene00019980	chil-14	protein_coding
V	778639	780223	1585	+	WBGene00019981	srbc-59	protein_coding
V	773518	774775	1258	+	WBGene00019983	sti-1	protein_coding
V	517801	519545	1745	-	WBGene00020015	nhr-210	protein_coding
V	7409899	7411255	1357	+	WBGene00020054	R13D7.2	protein_coding
V	7407547	7408814	1268	-	WBGene00020055	srt-6	protein_coding
V	817482	818733	1252	+	WBGene00020056	R13D11.1	protein_coding
V	815016	816873	1858	+	WBGene00020057	R13D11.3	protein_coding
V	497699	499060	1362	+	WBGene00020151	T01G6.1	protein_coding
V	865074	866829	1756	-	WBGene00020155	T02B11.3	protein_coding
V	869482	871129	1648	-	WBGene00020156	T02B11.4	protein_coding
V	4126319	4127535	1217	-	WBGene00020244	T05B4.13	protein_coding
V	7733624	7734911	1288	-	WBGene00020246	clic-1	protein_coding
V	6448656	6450217	1562	+	WBGene00020265	fbxa-196	protein_coding
V	6436645	6437884	1240	+	WBGene00020268	hpo-19	protein_coding
V	6424247	6426261	2015	-	WBGene00020274	T05H4.11	protein_coding
V	6440174	6441713	1540	-	WBGene00020276	T05H4.15	protein_coding
V	6977670	6979119	1450	-	WBGene00020333	sre-12	protein_coding
V	1870420	1871807	1388	-	WBGene00020390	T10B5.4	protein_coding
V	1869213	1870558	1346	+	WBGene00020392	knl-3	protein_coding
V	1846201	1848015	1815	+	WBGene00020393	T10B5.7	protein_coding
V	6653613	6655449	1837	-	WBGene00020425	syx-18	protein_coding
V	6815666	6817284	1619	-	WBGene00020523	dmsr-14	protein_coding
V	6817890	6819912	2023	-	WBGene00020524	dmsr-13	protein_coding
V	6827071	6828886	1816	-	WBGene00020525	dmsr-15	protein_coding
V	6836695	6838665	1971	-	WBGene00020527	T15B7.15	protein_coding
V	8964662	8966186	1525	-	WBGene00020555	nhr-219	protein_coding
V	4896048	4897969	1922	+	WBGene00020587	ugt-9	protein_coding
V	3428997	3430433	1437	+	WBGene00020607	srab-20	protein_coding
V	3426376	3427733	1358	+	WBGene00020608	srab-22	protein_coding
V	3393321	3394744	1424	-	WBGene00020620	T20D4.15	protein_coding
V	3422949	3424441	1493	-	WBGene00020623	srab-21	protein_coding
V	334601	336450	1850	-	WBGene00020708	dmd-8	protein_coding
V	8467265	8468943	1679	+	WBGene00020717	mrpl-4	protein_coding
V	8465686	8467159	1474	+	WBGene00020718	mrps-2	protein_coding
V	8446607	8448028	1422	-	WBGene00020720	T23B12.5	protein_coding
V	8470013	8471242	1230	-	WBGene00020722	T23B12.8	protein_coding
V	3530703	3532380	1678	+	WBGene00020746	srbc-66	protein_coding
V	3525270	3526580	1311	+	WBGene00020747	T24A6.7	protein_coding
V	3541586	3543444	1859	-	WBGene00020750	nhr-222	protein_coding
V	3561460	3562924	1465	-	WBGene00020753	T24A6.16	protein_coding
V	3553134	3554571	1438	+	WBGene00020756	T24A6.20	protein_coding
V	9092345	9094357	2013	+	WBGene00020861	T27E4.1	protein_coding
V	9068368	9069780	1413	-	WBGene00020863	T27E4.5	protein_coding
V	9074784	9076322	1539	-	WBGene00020865	T27E4.7	protein_coding
V	3260375	3262082	1708	+	WBGene00020874	srbc-5	protein_coding
V	3254777	3256151	1375	-	WBGene00020877	srt-63	protein_coding
V	3266399	3268050	1652	-	WBGene00020880	T28A11.18	protein_coding
V	3271395	3273256	1862	-	WBGene00020882	T28A11.20	protein_coding
V	6329197	6331086	1890	+	WBGene00020889	T28C12.2	protein_coding
V	6327280	6328865	1586	+	WBGene00020890	fbxa-202	protein_coding
V	6497108	6498484	1377	+	WBGene00020910	dgtr-1	protein_coding
V	8297700	8299241	1542	-	WBGene00020941	W02D7.5	protein_coding
V	8299753	8301507	1755	-	WBGene00020942	W02D7.6	protein_coding
V	8305120	8306466	1347	-	WBGene00020943	W02D7.8	protein_coding
V	8302779	8304511	1733	-	WBGene00020946	W02D7.11	protein_coding
V	6703057	6704573	1517	+	WBGene00020948	era-1	protein_coding
V	138892	140245	1354	+	WBGene00021003	W03F9.9	protein_coding
V	6206755	6208561	1807	+	WBGene00021066	W06H8.2	protein_coding
V	1130112	1131930	1819	-	WBGene00021072	W07B8.4	protein_coding
V	3684662	3685892	1231	-	WBGene00021079	W08A12.2	protein_coding
V	8830183	8831441	1259	+	WBGene00021106	W09B7.1	protein_coding
V	8828165	8829909	1745	+	WBGene00021107	W09B7.2	protein_coding
V	2189586	2191222	1637	-	WBGene00021166	srbc-42	protein_coding
V	2205030	2206281	1252	-	WBGene00021169	srt-40	protein_coding
V	2358801	2360543	1743	+	WBGene00021221	Y19D10A.6	protein_coding
V	2351676	2352932	1257	+	WBGene00021224	clec-209	protein_coding
V	6097105	6099083	1979	+	WBGene00021391	smut-1	protein_coding
V	2033792	2035645	1854	-	WBGene00021488	srab-23	protein_coding
V	2052226	2053609	1384	-	WBGene00021492	comt-5	protein_coding
V	1960045	1961553	1509	-	WBGene00021494	Y40B10B.1	protein_coding
V	2556174	2557415	1242	+	WBGene00021566	Y45G12C.3	protein_coding
V	2546200	2548150	1951	+	WBGene00021567	Y45G12C.4	protein_coding
V	2522433	2524290	1858	+	WBGene00021571	srbc-81	protein_coding
V	2534758	2536409	1652	-	WBGene00021573	Y45G12C.10	protein_coding
V	1809557	1811135	1579	-	WBGene00021600	Y46H3A.4	protein_coding
V	1691029	1692495	1467	-	WBGene00021605	Y46H3C.5	protein_coding
V	1692458	1694022	1565	-	WBGene00021607	Y46H3C.7	protein_coding
V	1625189	1626820	1632	-	WBGene00021610	nhr-237	protein_coding
V	1628105	1629432	1328	-	WBGene00021611	nhr-238	protein_coding
V	4410943	4412401	1459	+	WBGene00021617	Y47D7A.3	protein_coding
V	4431695	4433187	1493	-	WBGene00021627	Y47D7A.15	protein_coding
V	709108	710566	1459	+	WBGene00021706	srbc-39	protein_coding
V	707218	708453	1236	+	WBGene00021707	srbc-38	protein_coding
V	1088283	1089891	1609	+	WBGene00021744	clec-203	protein_coding
V	6945658	6947542	1885	-	WBGene00021964	Y57E12B.4	protein_coding
V	5067637	5069540	1904	-	WBGene00021975	Y58A7A.1	protein_coding
V	5085704	5086969	1266	-	WBGene00021979	Y58A7A.5	protein_coding
V	4558254	4559801	1548	-	WBGene00022018	Y61A9LA.7	protein_coding
V	4605004	4606928	1925	-	WBGene00022022	txt-6	protein_coding
V	3195408	3196882	1475	-	WBGene00022258	Y73C8B.1	protein_coding
V	3193419	3195002	1584	-	WBGene00022259	Y73C8B.2	protein_coding
V	3191302	3193237	1936	-	WBGene00022260	Y73C8B.3	protein_coding
V	3118377	3120323	1947	+	WBGene00022261	clec-210	protein_coding
V	3120282	3121843	1562	-	WBGene00022266	srt-56	protein_coding
V	1391154	1393000	1847	-	WBGene00022287	Y75B7AR.1	protein_coding
V	1274220	1276024	1805	-	WBGene00022289	Y75B7B.2	protein_coding
V	8006186	8007510	1325	-	WBGene00022398	Y97E10AR.3	protein_coding
V	8012397	8013951	1555	-	WBGene00022401	Y97E10AR.6	protein_coding
V	7928960	7930416	1457	+	WBGene00022404	srsx-5	protein_coding
V	7927084	7928451	1368	+	WBGene00022405	srsx-6	protein_coding
V	7938605	7940399	1795	-	WBGene00022409	srt-53	protein_coding
V	7728879	7730317	1439	+	WBGene00022410	Y97E10C.1	protein_coding
V	4298526	4299841	1316	-	WBGene00022522	ZC132.3	protein_coding
V	8681350	8682762	1413	+	WBGene00022537	ZC190.2	protein_coding
V	8671964	8673598	1635	-	WBGene00022539	ZC190.5	protein_coding
V	8736669	8738521	1853	+	WBGene00022547	ZC196.3	protein_coding
V	5460106	5461448	1343	+	WBGene00022588	ZC317.2	protein_coding
V	6794189	6795771	1583	+	WBGene00022601	ZC404.1	protein_coding
V	6800724	6801950	1227	-	WBGene00022604	dmsr-10	protein_coding
V	6802412	6804092	1681	-	WBGene00022605	dmsr-11	protein_coding
V	6798151	6799664	1514	-	WBGene00022606	dmsr-9	protein_coding
V	404619	405997	1379	+	WBGene00022637	nhr-252	protein_coding
V	400021	401602	1582	+	WBGene00022638	scl-27	protein_coding
V	385746	387740	1995	+	WBGene00022642	lipl-5	protein_coding
V	415870	417706	1837	-	WBGene00022645	ZK6.11	protein_coding
V	6453226	6454965	1740	+	WBGene00022646	acl-9	protein_coding
V	7716419	7717729	1311	-	WBGene00022656	ZK105.5	protein_coding
V	7722837	7724067	1231	-	WBGene00022657	ZK105.6	protein_coding
V	600531	602469	1939	+	WBGene00022756	nhr-251	protein_coding
V	9290552	9292165	1614	-	WBGene00022790	ZK682.7	protein_coding
V	1754238	1755689	1452	-	WBGene00022809	ZK697.14	protein_coding
V	7808367	7809912	1546	-	WBGene00022813	ZK742.3	protein_coding
V	7810228	7811792	1565	-	WBGene00022814	ZK742.4	protein_coding
V	6291390	6292666	1277	-	WBGene00023432	K12B6.9	protein_coding
V	15163082	15164518	1437	+	WBGene00023506	srz-11	protein_coding
V	8188788	8190116	1329	-	WBGene00043069	F20D6.12	protein_coding
V	10887847	10889136	1290	-	WBGene00043302	F32D8.11	protein_coding
V	10121134	10122770	1637	-	WBGene00044012	srxa-19	protein_coding
V	10413211	10414710	1500	-	WBGene00044013	F15H10.9	protein_coding
V	10415734	10417025	1292	-	WBGene00044014	F15H10.10	protein_coding
V	10504193	10505410	1218	+	WBGene00044016	C35A5.10	protein_coding
V	11501374	11503131	1758	-	WBGene00044019	C55A6.12	protein_coding
V	10100224	10102016	1793	-	WBGene00044044	C08B6.14	protein_coding
V	17415251	17416748	1498	+	WBGene00044059	T27C5.12	protein_coding
V	14101186	14102821	1636	+	WBGene00044082	D1086.12	protein_coding
V	2175542	2177503	1962	+	WBGene00044087	C45H4.18	protein_coding
V	3482960	3484802	1843	-	WBGene00044090	srbc-33	protein_coding
V	780299	781803	1505	+	WBGene00044091	srbc-60	protein_coding
V	17431203	17432501	1299	+	WBGene00044100	srbc-27	protein_coding
V	14335201	14336712	1512	+	WBGene00044112	srm-5	protein_coding
V	13924151	13925807	1657	+	WBGene00044114	srxa-11	protein_coding
V	13929803	13931252	1450	+	WBGene00044116	srxa-13	protein_coding
V	4973235	4974777	1543	-	WBGene00044117	srsx-10	protein_coding
V	14953107	14954733	1627	-	WBGene00044179	C30G7.5	protein_coding
V	17273549	17275017	1469	+	WBGene00044202	K10G4.10	protein_coding
V	11332962	11334293	1332	-	WBGene00044203	T02E9.6	protein_coding
V	9931015	9932369	1355	+	WBGene00044204	suds-3	protein_coding
V	16843241	16844851	1611	+	WBGene00044331	clec-25	protein_coding
V	16846811	16848598	1788	-	WBGene00044332	clec-36	protein_coding
V	7731839	7733501	1663	-	WBGene00044342	T05B11.7	protein_coding
V	1821579	1823096	1518	+	WBGene00044344	mrpl-39	protein_coding
V	2272441	2274353	1913	-	WBGene00044521	Y5H2A.4	protein_coding
V	3668764	3670784	2021	+	WBGene00044527	Y39H10B.2	protein_coding
V	5130318	5131540	1223	+	WBGene00044536	F14F9.8	protein_coding
V	5365163	5366792	1630	+	WBGene00044538	T09D3.8	protein_coding
V	5714727	5716608	1882	-	WBGene00044539	K09H11.9	protein_coding
V	7618414	7620401	1988	+	WBGene00044550	C50E3.15	protein_coding
V	7724494	7726110	1617	+	WBGene00044551	ZK105.8	protein_coding
V	7063697	7065326	1630	-	WBGene00044612	Y57E12AR.1	protein_coding
V	17259168	17260561	1394	+	WBGene00044654	fbxa-85	protein_coding
V	19777247	19778708	1462	-	WBGene00044655	fbxa-194	protein_coding
V	16129409	16131349	1941	-	WBGene00044659	fbxa-142	protein_coding
V	16125794	16127501	1708	-	WBGene00044661	fbxa-143	protein_coding
V	2392772	2394147	1376	+	WBGene00044734	Y19D10A.16	protein_coding
V	2414154	2416011	1858	+	WBGene00044735	Y19D10A.17	protein_coding
V	18129170	18131129	1960	-	WBGene00044758	Y37H2A.12	protein_coding
V	6652351	6653747	1397	+	WBGene00044779	T10H9.8	protein_coding
V	12275570	12277046	1477	-	WBGene00044791	bnc-1	protein_coding
V	18053778	18055397	1620	-	WBGene00044794	Y59A8B.25	protein_coding
V	5805767	5807534	1768	+	WBGene00045306	ZC250.5	protein_coding
V	12724558	12725993	1436	-	WBGene00045336	R11D1.12	protein_coding
V	15263005	15264231	1227	-	WBGene00045337	M01B2.12	protein_coding
V	15264554	15265914	1361	-	WBGene00045338	M01B2.13	protein_coding
V	15266265	15267505	1241	-	WBGene00045339	T10H4.13	protein_coding
V	16598889	16600723	1835	-	WBGene00045356	T03E6.9	protein_coding
V	11044067	11045743	1677	+	WBGene00045379	C45B11.6	protein_coding
V	17061885	17063133	1249	+	WBGene00045381	F28B1.9	protein_coding
V	7953162	7954652	1491	-	WBGene00045393	F26D11.13	protein_coding
V	13979462	13980907	1446	-	WBGene00045401	eol-1	protein_coding
V	14085889	14087188	1300	+	WBGene00045405	D1086.18	protein_coding
V	19460605	19462120	1516	-	WBGene00045415	Y43F8B.15	protein_coding
V	13006970	13008925	1956	-	WBGene00045418	F15B9.10	protein_coding
V	13196088	13197923	1836	-	WBGene00045488	F57B1.9	protein_coding
V	17628866	17630215	1350	+	WBGene00045506	F57G4.10	protein_coding
V	16202918	16204862	1945	+	WBGene00045511	F11A5.18	protein_coding
V	15318961	15320553	1593	+	WBGene00045515	nhr-291	protein_coding
V	14638650	14640171	1522	-	WBGene00045516	F43D2.7	protein_coding
V	20605105	20606447	1343	+	WBGene00050892	ttr-57	protein_coding
V	16044294	16045940	1647	-	WBGene00050899	T10C6.15	protein_coding
V	15729195	15730559	1365	-	WBGene00050915	Y6E2A.10	protein_coding
V	18159652	18161328	1677	-	WBGene00050956	C14A6.13	protein_coding
V	19418136	19419434	1299	+	WBGene00050967	C25F9.15	protein_coding
V	15670439	15671850	1412	+	WBGene00077450	K06B4.15	protein_coding
V	18684937	18686389	1453	+	WBGene00077455	Y69H2.17	protein_coding
V	10001060	10002790	1731	+	WBGene00077491	K08H10.10	protein_coding
V	16907969	16909971	2003	-	WBGene00077493	F09C6.16	protein_coding
V	11259312	11260722	1411	-	WBGene00077514	F07B10.7	protein_coding
V	11760671	11761962	1292	+	WBGene00077538	T04F3.5	protein_coding
V	12806490	12808277	1788	+	WBGene00077562	ZC443.7	protein_coding
V	14509738	14511123	1386	-	WBGene00077577	R02D5.9	protein_coding
V	4038410	4039940	1531	+	WBGene00077593	C49G7.12	protein_coding
V	17697506	17699197	1692	-	WBGene00077640	Y26G10.4	protein_coding
V	19510768	19512310	1543	-	WBGene00077688	Y43F8B.19	protein_coding
V	13092649	13094482	1834	+	WBGene00077698	lurp-4	protein_coding
V	19548199	19549789	1591	-	WBGene00086559	Y43F8B.20	protein_coding
V	13443835	13445055	1221	+	WBGene00086568	Y2H9A.6	protein_coding
V	20772440	20773747	1308	-	WBGene00086569	F38A6.5	protein_coding
V	18351021	18352672	1652	+	WBGene00119201	C08E8.11	protein_coding
V	20593262	20594846	1585	-	WBGene00138719	F26F2.10	protein_coding
V	11935148	11936529	1382	+	WBGene00138720	F58H1.8	protein_coding
V	19820567	19822193	1627	-	WBGene00189943	Y116F11B.17	protein_coding
V	12644800	12646679	1880	+	WBGene00189948	F56H9.8	protein_coding
V	14521204	14522614	1411	-	WBGene00194706	C53A5.16	protein_coding
V	14519371	14521100	1730	-	WBGene00194707	C53A5.17	protein_coding
V	10222307	10223521	1215	+	WBGene00194780	C12D8.20	protein_coding
V	6807762	6809062	1301	-	WBGene00194821	dmsr-16	protein_coding
V	4108662	4109973	1312	-	WBGene00194894	T05B4.14	protein_coding
V	7707025	7708625	1601	-	WBGene00194895	ZK105.11	protein_coding
V	3670799	3672239	1441	+	WBGene00194902	Y39H10B.3	protein_coding
V	10184682	10186007	1326	-	WBGene00194912	ZK856.18	protein_coding
V	18783716	18784957	1242	+	WBGene00194982	Y17D7B.10	protein_coding
V	9122304	9123564	1261	+	WBGene00195086	F21C10.13	protein_coding
V	12656807	12658242	1436	-	WBGene00195166	W05B10.6	protein_coding
V	1197817	1199269	1453	-	WBGene00195169	Y50D4A.6	protein_coding
V	19457420	19459092	1673	+	WBGene00195176	Y43F8B.24	protein_coding
V	6772210	6773835	1626	-	WBGene00195226	ZC404.16	protein_coding
V	9255691	9257567	1877	-	WBGene00202511	F07C3.16	protein_coding
V	15146387	15147876	1490	-	WBGene00202514	T09F5.20	protein_coding
V	4294156	4296020	1865	-	WBGene00206392	F47D2.11	protein_coding
V	19449733	19450950	1218	+	WBGene00206418	M04C3.5	protein_coding
V	13131873	13133565	1693	-	WBGene00219208	B0365.9	protein_coding
V	18131619	18133277	1659	-	WBGene00219210	Y37H2A.18	protein_coding
V	4671016	4672587	1572	-	WBGene00219236	K03B4.9	protein_coding
V	6101747	6103529	1783	-	WBGene00219449	Y38A10A.11	protein_coding
V	7525995	7527228	1234	+	WBGene00235093	C54F6.18	protein_coding
V	7714905	7716134	1230	-	WBGene00235113	ZK105.12	protein_coding
V	9155530	9156779	1250	-	WBGene00235316	B0222.15	protein_coding
V	4791869	4793178	1310	+	WBGene00235320	R02F11.11	protein_coding
V	7322215	7323790	1576	+	WBGene00235324	F10G2.10	protein_coding
V	1798200	1799694	1495	+	WBGene00268194	F36H9.10	protein_coding
V	2812438	2813987	1550	-	WBGene00268206	F54E2.9	protein_coding
V	4020656	4021876	1221	-	WBGene00269424	K09D9.14	protein_coding
V	4036111	4038054	1944	+	WBGene00269425	C49G7.13	protein_coding
V	4296682	4298679	1998	-	WBGene00269432	ZC132.11	protein_coding
V	7134263	7135755	1493	+	WBGene00271437	F10D2.16	protein_coding
V	6320251	6321783	1533	-	WBGene00271821	T28C12.15	protein_coding
V	1475086	1476784	1699	+	WBGene00302980	F53E2.2	protein_coding
V	10941450	10942850	1401	+	WBGene00303011	F17C11.26	protein_coding
V	14064722	14066235	1514	+	WBGene00304203	D1086.21	protein_coding
X	1408836	1410652	1817	-	WBGene00000025	abu-2	protein_coding
X	8322111	8323343	1233	+	WBGene00000032	abu-9	protein_coding
X	3798182	3799741	1560	+	WBGene00000033	abu-10	protein_coding
X	3025063	3026974	1912	+	WBGene00000175	aqp-7	protein_coding
X	1786907	1788405	1499	+	WBGene00000185	arg-1	protein_coding
X	4469766	4471476	1711	+	WBGene00000207	asb-2	protein_coding
X	6791064	6792709	1646	+	WBGene00000216	asp-3	protein_coding
X	14809156	14810810	1655	-	WBGene00000221	atf-4	protein_coding
X	13598449	13599687	1239	+	WBGene00000262	bra-1	protein_coding
X	16487481	16489397	1917	+	WBGene00000281	cah-3	protein_coding
X	13542574	13544599	2026	+	WBGene00000282	cah-4	protein_coding
X	13074673	13076092	1420	+	WBGene00000450	ceh-28	protein_coding
X	3063574	3065551	1978	+	WBGene00000451	ceh-30	protein_coding
X	3068648	3070422	1775	-	WBGene00000452	ceh-31	protein_coding
X	11047446	11049275	1830	+	WBGene00000522	clc-1	protein_coding
X	3373236	3374742	1507	-	WBGene00000524	clc-3	protein_coding
X	15175032	15176481	1450	-	WBGene00000618	col-41	protein_coding
X	2093469	2094846	1378	+	WBGene00000737	col-164	protein_coding
X	4353618	4354852	1235	+	WBGene00000738	col-165	protein_coding
X	6672819	6674423	1605	+	WBGene00000745	col-172	protein_coding
X	7546809	7548365	1557	+	WBGene00000747	col-174	protein_coding
X	6607207	6609045	1839	+	WBGene00000786	cpr-6	protein_coding
X	3360722	3362493	1772	-	WBGene00000989	dhs-26	protein_coding
X	3412876	3414710	1835	-	WBGene00000990	dhs-27	protein_coding
X	6818438	6820080	1643	+	WBGene00000991	dhs-28	protein_coding
X	4709741	4711748	2008	-	WBGene00001032	dnj-14	protein_coding
X	7536467	7537792	1326	-	WBGene00001069	dpy-7	protein_coding
X	5148804	5150476	1673	-	WBGene00001070	dpy-8	protein_coding
X	14090389	14092054	1666	+	WBGene00001106	dsl-4	protein_coding
X	13475876	13477456	1581	-	WBGene00001164	efn-3	protein_coding
X	10156858	10158829	1972	-	WBGene00001331	erd-2.1	protein_coding
X	8283275	8285219	1945	-	WBGene00001425	fis-2	protein_coding
X	13421822	13423440	1619	-	WBGene00001435	fkh-3	protein_coding
X	13427114	13428855	1742	-	WBGene00001436	fkh-4	protein_coding
X	11603708	11605419	1712	-	WBGene00001502	ftt-2	protein_coding
X	6058255	6060242	1988	+	WBGene00001602	gln-1	protein_coding
X	9870632	9872654	2023	-	WBGene00001608	R07B1.8	protein_coding
X	3113443	3114689	1247	-	WBGene00001684	gpd-2	protein_coding
X	3112091	3113341	1251	-	WBGene00001685	gpd-3	protein_coding
X	7267870	7269479	1610	-	WBGene00001696	grd-7	protein_coding
X	3632367	3633754	1388	-	WBGene00001759	gst-11	protein_coding
X	9861646	9862960	1315	-	WBGene00001784	gst-36	protein_coding
X	11726264	11727936	1673	-	WBGene00001790	gst-42	protein_coding
X	4249249	4250766	1518	+	WBGene00001957	hlh-13	protein_coding
X	555792	557295	1504	-	WBGene00001962	hlh-19	protein_coding
X	11684561	11685788	1228	+	WBGene00001981	hnd-1	protein_coding
X	13245390	13247044	1655	+	WBGene00001995	hpl-1	protein_coding
X	381385	382709	1325	-	WBGene00002060	ife-2	protein_coding
X	11295007	11296733	1727	-	WBGene00002124	inx-2	protein_coding
X	6376459	6377684	1226	-	WBGene00003053	lmp-1	protein_coding
X	3114668	3116589	1922	-	WBGene00003124	mai-1	protein_coding
X	6742351	6743899	1549	+	WBGene00003163	mdl-1	protein_coding
X	7774856	7776689	1834	-	WBGene00003171	mec-7	protein_coding
X	7479248	7481005	1758	+	WBGene00003185	mek-1	protein_coding
X	17459210	17460778	1569	+	WBGene00003369	mlc-1	protein_coding
X	6408471	6410227	1757	-	WBGene00003495	mup-2	protein_coding
X	8917423	8919423	2001	-	WBGene00003752	nlp-14	protein_coding
X	6864315	6865939	1625	-	WBGene00003856	odr-10	protein_coding
X	17420211	17421582	1372	-	WBGene00003891	osm-11	protein_coding
X	1079430	1080649	1220	-	WBGene00003991	pfn-3	protein_coding
X	8319594	8320989	1396	-	WBGene00004141	pqn-57	protein_coding
X	11393294	11394619	1326	+	WBGene00004197	prx-12	protein_coding
X	17222475	17224465	1991	+	WBGene00004270	rab-6.2	protein_coding
X	15604635	15606635	2001	-	WBGene00004276	rab-14	protein_coding
X	1915258	1917162	1905	+	WBGene00004352	rgs-9	protein_coding
X	14962756	14964143	1388	+	WBGene00004353	rgs-10	protein_coding
X	14964553	14965976	1424	+	WBGene00004354	rgs-11	protein_coding
X	5778875	5780722	1848	-	WBGene00004788	sft-4	protein_coding
X	17092753	17094306	1554	+	WBGene00004932	sod-3	protein_coding
X	13293361	13294769	1409	-	WBGene00005114	srd-36	protein_coding
X	13298863	13300603	1741	-	WBGene00005117	srd-39	protein_coding
X	12323739	12325668	1930	+	WBGene00005118	srd-40	protein_coding
X	12326724	12328365	1642	+	WBGene00005119	srd-41	protein_coding
X	13301599	13303457	1859	-	WBGene00005120	srd-42	protein_coding
X	13303905	13305844	1940	-	WBGene00005121	srd-43	protein_coding
X	12338440	12340248	1809	+	WBGene00005122	srd-44	protein_coding
X	12328976	12330526	1551	+	WBGene00005123	srd-45	protein_coding
X	12333642	12335290	1649	+	WBGene00005125	srd-47	protein_coding
X	12336108	12337752	1645	+	WBGene00005126	srd-48	protein_coding
X	8317637	8319050	1414	-	WBGene00005237	srh-11	protein_coding
X	5180174	5181495	1322	+	WBGene00005711	sru-48	protein_coding
X	4252347	4254174	1828	+	WBGene00005716	srv-5	protein_coding
X	7562824	7564814	1991	+	WBGene00006063	sto-1	protein_coding
X	13082626	13084235	1610	+	WBGene00006078	str-10	protein_coding
X	10239805	10241039	1235	-	WBGene00006135	str-74	protein_coding
X	12790336	12791751	1416	+	WBGene00006174	str-123	protein_coding
X	12787924	12789256	1333	+	WBGene00006175	str-124	protein_coding
X	11836068	11837478	1411	-	WBGene00006388	taf-7.1	protein_coding
X	4255170	4256812	1643	+	WBGene00006393	taf-11.1	protein_coding
X	15506037	15507880	1844	-	WBGene00006494	zipt-7.2	protein_coding
X	1655507	1657104	1598	+	WBGene00006551	tbx-32	protein_coding
X	1865246	1866638	1393	+	WBGene00006560	tbx-41	protein_coding
X	11375887	11377470	1584	-	WBGene00006584	tni-1	protein_coding
X	8721546	8723550	2005	-	WBGene00006587	tnt-2	protein_coding
X	2820448	2822151	1704	+	WBGene00006632	tsp-6	protein_coding
X	1246017	1247892	1876	+	WBGene00006635	tsp-9	protein_coding
X	6994769	6996620	1852	-	WBGene00006642	tsp-16	protein_coding
X	8422480	8423733	1254	-	WBGene00006649	tth-1	protein_coding
X	8867603	8869162	1560	-	WBGene00006717	ubc-22	protein_coding
X	8844288	8846275	1988	+	WBGene00006718	ubc-23	protein_coding
X	5593133	5594965	1833	+	WBGene00006826	unc-97	protein_coding
X	3092395	3094349	1955	-	WBGene00006948	wrt-2	protein_coding
X	228080	229474	1395	-	WBGene00007075	AC8.3	protein_coding
X	9440079	9441571	1493	-	WBGene00007128	memb-1	protein_coding
X	9431432	9432745	1314	+	WBGene00007129	B0272.3	protein_coding
X	9428431	9430424	1994	+	WBGene00007130	B0272.4	protein_coding
X	12658476	12659847	1372	-	WBGene00007259	C02B4.3	protein_coding
X	11267321	11269070	1750	-	WBGene00007268	C03A3.3	protein_coding
X	12280777	12282559	1783	+	WBGene00007289	C04B4.1	protein_coding
X	12285796	12287286	1491	+	WBGene00007291	lips-2	protein_coding
X	14020590	14022394	1805	+	WBGene00007295	C04C11.1	protein_coding
X	12941442	12943266	1825	-	WBGene00007343	C05E7.1	protein_coding
X	10172198	10174179	1982	+	WBGene00007397	C07A4.2	protein_coding
X	9584668	9586344	1677	+	WBGene00007516	gpx-5	protein_coding
X	9617219	9619242	2024	+	WBGene00007521	C11E4.7	protein_coding
X	16328628	16330150	1523	+	WBGene00007523	C11G6.2	protein_coding
X	15157359	15158749	1391	-	WBGene00007525	C11G10.1	protein_coding
X	9919297	9920791	1495	+	WBGene00007648	folr-1	protein_coding
X	9921557	9922843	1287	+	WBGene00007649	C17G1.2	protein_coding
X	9952579	9954533	1955	-	WBGene00007653	cysl-1	protein_coding
X	16075013	16076570	1558	-	WBGene00007818	C30F2.4	protein_coding
X	10258363	10260135	1773	-	WBGene00007861	C32A9.1	protein_coding
X	12930261	12932283	2023	+	WBGene00007933	C34E7.3	protein_coding
X	11207250	11208888	1639	-	WBGene00007939	C34F6.5	protein_coding
X	11202476	11203932	1457	-	WBGene00007945	C34F6.11	protein_coding
X	11545047	11546495	1449	-	WBGene00007955	selt-1.1	protein_coding
X	14180451	14181705	1255	+	WBGene00007995	C37E2.3	protein_coding
X	13647605	13648854	1250	+	WBGene00008036	C40C9.3	protein_coding
X	11702536	11704507	1972	+	WBGene00008084	C44C10.3	protein_coding
X	11687000	11688269	1270	-	WBGene00008088	C44C10.7	protein_coding
X	14595125	14596365	1241	+	WBGene00008096	C44H4.8	protein_coding
X	11980206	11982085	1880	-	WBGene00008208	nhr-167	protein_coding
X	11960138	11961530	1393	+	WBGene00008212	C49F5.8	protein_coding
X	13363328	13364997	1670	-	WBGene00008213	C49F8.1	protein_coding
X	13386057	13387547	1491	-	WBGene00008215	C49F8.3	protein_coding
X	14520763	14522705	1943	+	WBGene00008353	D1025.1	protein_coding
X	14511248	14512917	1670	-	WBGene00008355	fbxa-141	protein_coding
X	14250512	14252142	1631	-	WBGene00008464	E02H4.6	protein_coding
X	13398051	13399321	1271	-	WBGene00008516	F02C12.2	protein_coding
X	13462668	13463893	1226	-	WBGene00008523	F02D10.2	protein_coding
X	13446718	13448230	1513	+	WBGene00008527	set-8	protein_coding
X	11298036	11299784	1749	-	WBGene00008586	snrp-40.1	protein_coding
X	11300257	11302111	1855	+	WBGene00008587	F08G12.3	protein_coding
X	11308689	11310285	1597	-	WBGene00008588	F08G12.5	protein_coding
X	12985790	12987219	1430	-	WBGene00008691	mff-1	protein_coding
X	11185798	11187636	1839	+	WBGene00008737	gnrr-7	protein_coding
X	10675712	10677109	1398	-	WBGene00008745	F13E6.1	protein_coding
X	12306865	12308193	1329	+	WBGene00008902	phf-32	protein_coding
X	12321657	12322993	1337	+	WBGene00008904	F17A2.13	protein_coding
X	13519663	13521518	1856	+	WBGene00008939	F18H3.1	protein_coding
X	12389594	12391480	1887	-	WBGene00008956	nekl-3	protein_coding
X	12365688	12367255	1568	+	WBGene00008959	F19H6.4	protein_coding
X	12363683	12364904	1222	-	WBGene00008960	F19H6.5	protein_coding
X	14968900	14970271	1372	-	WBGene00008973	flwr-1	protein_coding
X	15002034	15003941	1908	-	WBGene00008979	slc-25A18.1	protein_coding
X	9895144	9897082	1939	+	WBGene00009024	F21G4.3	protein_coding
X	14445001	14446320	1320	+	WBGene00009088	F23D12.4	protein_coding
X	11509442	11511451	2010	-	WBGene00009258	ccdc-149	protein_coding
X	15917367	15918660	1294	+	WBGene00009279	F31B9.2	protein_coding
X	15923740	15925169	1430	+	WBGene00009280	F31B9.3	protein_coding
X	15915699	15917100	1402	-	WBGene00009281	F31B9.4	protein_coding
X	9633284	9635025	1742	-	WBGene00009380	F34H10.3	protein_coding
X	9635676	9637031	1356	+	WBGene00009382	F34H10.5	protein_coding
X	9792406	9794273	1868	-	WBGene00009483	F36G3.2	protein_coding
X	14701790	14703688	1899	+	WBGene00009573	F40E10.5	protein_coding
X	14791008	14792984	1977	+	WBGene00009628	tatn-1	protein_coding
X	10212769	10214368	1600	+	WBGene00009675	F44A6.3	protein_coding
X	10217309	10218929	1621	-	WBGene00009677	F44A6.5	protein_coding
X	12475551	12477441	1891	-	WBGene00009725	F45E6.1	protein_coding
X	13310227	13311755	1529	-	WBGene00009796	F46G10.1	protein_coding
X	10892190	10893677	1488	+	WBGene00009814	F47B10.3	protein_coding
X	10889041	10890556	1516	-	WBGene00009816	F47B10.5	protein_coding
X	10903272	10905088	1817	+	WBGene00009818	acbp-3	protein_coding
X	10912154	10914081	1928	-	WBGene00009820	F47B10.9	protein_coding
X	13975653	13977226	1574	+	WBGene00009850	F48F7.5	protein_coding
X	13979069	13980517	1449	-	WBGene00009852	arrd-24	protein_coding
X	15885604	15887595	1992	-	WBGene00010008	F53H4.3	protein_coding
X	13594121	13596068	1948	-	WBGene00010028	F54B11.5	protein_coding
X	13602223	13603926	1704	-	WBGene00010031	F54B11.8	protein_coding
X	11843663	11845337	1675	+	WBGene00010064	F54F7.2	protein_coding
X	11865383	11866827	1445	+	WBGene00010066	F54F7.6	protein_coding
X	11867971	11869360	1390	-	WBGene00010067	dot-1.2	protein_coding
X	11853631	11855003	1373	-	WBGene00010068	F54F7.8	protein_coding
X	11929767	11931659	1893	-	WBGene00010120	dot-1.4	protein_coding
X	11940336	11942051	1716	-	WBGene00010121	F55G7.3	protein_coding
X	11012637	11014526	1890	+	WBGene00010223	F58A3.3	protein_coding
X	10997975	10999276	1302	-	WBGene00010335	F59F3.6	protein_coding
X	15067533	15069342	1810	-	WBGene00010359	mam-6	protein_coding
X	15642938	15644435	1498	+	WBGene00010372	H08J19.1	protein_coding
X	14241575	14243395	1821	-	WBGene00010553	K04C1.3	protein_coding
X	14248053	14249845	1793	+	WBGene00010555	K04C1.5	protein_coding
X	13238497	13240076	1580	+	WBGene00010691	K08H2.4	protein_coding
X	13241029	13242331	1303	-	WBGene00010692	K08H2.5	protein_coding
X	10959436	10960942	1507	+	WBGene00010715	K09C8.2	protein_coding
X	10970929	10972173	1245	+	WBGene00010718	K09C8.8	protein_coding
X	13717536	13719351	1816	+	WBGene00010774	K11E4.2	protein_coding
X	13841610	13843322	1713	+	WBGene00010833	M03B6.1	protein_coding
X	12146832	12148771	1940	+	WBGene00010924	pycr-1	protein_coding
X	15429919	15431198	1280	-	WBGene00010981	blos-8	protein_coding
X	15441731	15443630	1900	+	WBGene00010984	nkat-3	protein_coding
X	14163099	14164506	1408	-	WBGene00010993	vha-20	protein_coding
X	14155115	14157013	1899	-	WBGene00010995	ceh-90	protein_coding
X	13285121	13286633	1513	-	WBGene00011010	R04D3.2	protein_coding
X	13288917	13290631	1715	-	WBGene00011011	R04D3.3	protein_coding
X	13307152	13308845	1694	-	WBGene00011013	srxa-8	protein_coding
X	9856918	9858136	1219	+	WBGene00011082	R07B1.11	protein_coding
X	10339217	10341161	1945	-	WBGene00011102	R07E3.1	protein_coding
X	11107376	11109340	1965	+	WBGene00011140	R08B4.4	protein_coding
X	16184369	16185722	1354	+	WBGene00011227	nlp-67	protein_coding
X	13217102	13219017	1916	+	WBGene00011255	R12H7.4	protein_coding
X	12111513	12113536	2024	+	WBGene00011355	lgc-14	protein_coding
X	12114324	12115923	1600	+	WBGene00011356	lgc-15	protein_coding
X	12118640	12120661	2022	+	WBGene00011358	lgc-16	protein_coding
X	14812361	14814380	2020	+	WBGene00011426	T04C10.3	protein_coding
X	10792898	10794747	1850	-	WBGene00011463	T05A10.6	protein_coding
X	12703364	12704821	1458	-	WBGene00011565	nhr-272	protein_coding
X	12700393	12702063	1671	-	WBGene00011566	nhr-214	protein_coding
X	177375	179394	2020	+	WBGene00011610	T08D2.5	protein_coding
X	15193086	15194383	1298	-	WBGene00011683	phat-6	protein_coding
X	12858001	12859633	1633	+	WBGene00011770	T14G8.2	protein_coding
X	12449892	12451443	1552	+	WBGene00011823	T18D3.6	protein_coding
X	14540660	14542092	1433	-	WBGene00011983	fbxa-81	protein_coding
X	16057676	16058945	1270	-	WBGene00012074	T27A8.2	protein_coding
X	11059994	11061871	1878	+	WBGene00012255	lpr-6	protein_coding
X	11065126	11066811	1686	+	WBGene00012257	lpr-4	protein_coding
X	11083468	11085262	1795	-	WBGene00012260	W04G3.7	protein_coding
X	12298683	12300012	1330	+	WBGene00012301	W06D11.3	protein_coding
X	12301323	12302855	1533	-	WBGene00012302	dot-1.3	protein_coding
X	13619938	13621728	1791	-	WBGene00012439	Y12A6A.1	protein_coding
X	13908371	13909950	1580	-	WBGene00012514	Y26E6A.3	protein_coding
X	11875541	11877359	1819	+	WBGene00013389	Y62H9A.1	protein_coding
X	11884330	11885677	1348	-	WBGene00013395	Y62H9A.7	protein_coding
X	11891104	11892428	1325	-	WBGene00013396	Y62H9A.8	protein_coding
X	11901034	11902761	1728	-	WBGene00013398	Y62H9A.10	protein_coding
X	11914124	11915624	1501	+	WBGene00013400	Y62H9A.12	protein_coding
X	11921233	11923174	1942	+	WBGene00013402	Y62H9A.14	protein_coding
X	15696700	15698062	1363	+	WBGene00014039	ZK662.2	protein_coding
X	15742610	15744298	1689	+	WBGene00014068	nhr-255	protein_coding
X	9450225	9451994	1770	-	WBGene00014141	ZK899.2	protein_coding
X	9453148	9454977	1830	+	WBGene00014142	ZK899.3	protein_coding
X	9463345	9464741	1397	+	WBGene00014144	ZK899.6	protein_coding
X	9447717	9449430	1714	-	WBGene00014145	ZK899.7	protein_coding
X	13792305	13793625	1321	-	WBGene00014216	ZK1086.2	protein_coding
X	13790832	13792258	1427	+	WBGene00014217	ZK1086.3	protein_coding
X	2259150	2261103	1954	-	WBGene00014999	AH9.3	protein_coding
X	17193300	17195137	1838	-	WBGene00015122	B0302.5	protein_coding
X	9291645	9293648	2004	+	WBGene00015179	B0416.3	protein_coding
X	9146148	9147649	1502	+	WBGene00015262	B0563.5	protein_coding
X	9152414	9154316	1903	-	WBGene00015264	B0563.7	protein_coding
X	3670374	3672098	1725	-	WBGene00015355	C02F12.5	protein_coding
X	6364496	6365717	1222	+	WBGene00015375	C03B1.4	protein_coding
X	6350316	6352076	1761	+	WBGene00015377	C03B1.6	protein_coding
X	6359405	6360758	1354	-	WBGene00015382	C03B1.14	protein_coding
X	1122421	1124246	1826	-	WBGene00015476	C05D9.9	protein_coding
X	4588762	4590446	1685	+	WBGene00015492	lnp-1	protein_coding
X	8872933	8874848	1916	-	WBGene00015527	C06E2.1	protein_coding
X	7341509	7342780	1272	+	WBGene00015565	C07D8.6	protein_coding
X	17099048	17100756	1709	-	WBGene00015587	lido-2	protein_coding
X	17106366	17107770	1405	-	WBGene00015589	lido-4	protein_coding
X	6018442	6019936	1495	-	WBGene00015623	C09B8.4	protein_coding
X	6020856	6022569	1714	-	WBGene00015624	C09B8.5	protein_coding
X	7413611	7415520	1910	-	WBGene00015668	C10A4.7	protein_coding
X	2803112	2805028	1917	+	WBGene00015748	C14A11.2	protein_coding
X	1823581	1825340	1760	-	WBGene00015774	C14E2.5	protein_coding
X	7954354	7956225	1872	+	WBGene00015776	dct-1	protein_coding
X	6240983	6242709	1727	+	WBGene00015778	got-2.2	protein_coding
X	3145565	3147517	1953	+	WBGene00015790	C15C7.4	protein_coding
X	3151148	3152461	1314	-	WBGene00015791	bbln-1	protein_coding
X	3165826	3167579	1754	+	WBGene00015793	pfut-1	protein_coding
X	6118526	6120537	2012	+	WBGene00015798	C15H9.2	protein_coding
X	3604291	3605741	1451	-	WBGene00015955	C18B2.4	protein_coding
X	9391645	9393332	1688	+	WBGene00016008	C23F12.3	protein_coding
X	9387341	9389177	1837	+	WBGene00016009	C23F12.4	protein_coding
X	8997500	8998859	1360	+	WBGene00016033	C24A3.2	protein_coding
X	5486487	5488102	1616	+	WBGene00016102	C25F6.1	protein_coding
X	1270898	1272561	1664	+	WBGene00016107	C25G6.1	protein_coding
X	5340189	5342212	2024	+	WBGene00016132	C26B9.2	protein_coding
X	5338301	5340182	1882	+	WBGene00016133	C26B9.3	protein_coding
X	8826604	8828540	1937	-	WBGene00016190	rcs-1	protein_coding
X	8829448	8831262	1815	-	WBGene00016191	C28G1.6	protein_coding
X	16921833	16923145	1313	+	WBGene00016254	fbxb-114	protein_coding
X	17043968	17045629	1662	-	WBGene00016268	C30G4.2	protein_coding
X	17302719	17304036	1318	+	WBGene00016346	fbxa-120	protein_coding
X	17293119	17294828	1710	-	WBGene00016349	C33E10.8	protein_coding
X	7112889	7114866	1978	+	WBGene00016464	C36B7.1	protein_coding
X	1676205	1678121	1917	-	WBGene00016486	fbxa-170	protein_coding
X	7896221	7897790	1570	-	WBGene00016533	C39D10.6	protein_coding
X	1209396	1210851	1456	+	WBGene00016724	C46H3.1	protein_coding
X	6844755	6845975	1221	+	WBGene00016894	C53B7.3	protein_coding
X	17340784	17342407	1624	+	WBGene00016899	C53C11.1	protein_coding
X	5543951	5545620	1670	+	WBGene00016933	C54G7.1	protein_coding
X	1727356	1729154	1799	+	WBGene00017222	F07G6.2	protein_coding
X	7568141	7569722	1582	-	WBGene00017244	apy-1	protein_coding
X	8428838	8430524	1687	+	WBGene00017257	F08F1.3	protein_coding
X	1500180	1501852	1673	-	WBGene00017297	F09E10.7	protein_coding
X	4115326	4116978	1653	+	WBGene00017306	F09F9.1	protein_coding
X	4119531	4121035	1505	-	WBGene00017308	F09F9.3	protein_coding
X	17380635	17382075	1441	-	WBGene00017341	F10D7.4	protein_coding
X	3302070	3304031	1962	+	WBGene00017382	F11D5.5	protein_coding
X	5804379	5805922	1544	-	WBGene00017428	F13D11.3	protein_coding
X	6898648	6899948	1301	-	WBGene00017446	F14B8.4	protein_coding
X	4344215	4345654	1440	+	WBGene00017471	F14H12.3	protein_coding
X	4363505	4364977	1473	-	WBGene00017475	F14H12.8	protein_coding
X	4647526	4649197	1672	-	WBGene00017532	ent-5	protein_coding
X	9259852	9261066	1215	+	WBGene00017579	F18G5.1	protein_coding
X	1424809	1426179	1371	+	WBGene00017611	F19G12.3	protein_coding
X	1327972	1329947	1976	-	WBGene00017666	F21E9.2	protein_coding
X	1335364	1337175	1812	-	WBGene00017667	ttr-37	protein_coding
X	8161612	8163073	1462	-	WBGene00017715	F22F1.3	protein_coding
X	5999610	6001532	1923	-	WBGene00017717	F22F4.4	protein_coding
X	16689316	16691336	2021	-	WBGene00017730	F22H10.6	protein_coding
X	802778	804269	1492	+	WBGene00017779	gtr-1	protein_coding
X	811173	813163	1991	-	WBGene00017781	F25E2.3	protein_coding
X	3793848	3795742	1895	-	WBGene00018027	F35A5.5	protein_coding
X	17019616	17020958	1343	-	WBGene00018031	F35B3.4	protein_coding
X	5377607	5379428	1822	+	WBGene00018034	sek-5	protein_coding
X	5375059	5377042	1984	+	WBGene00018035	sek-4	protein_coding
X	5365813	5367619	1807	+	WBGene00018036	F35C8.5	protein_coding
X	918397	920177	1781	+	WBGene00018077	F35H12.5	protein_coding
X	913290	914863	1574	+	WBGene00018078	F35H12.6	protein_coding
X	16902393	16903719	1327	-	WBGene00018204	F39F10.4	protein_coding
X	3262900	3264206	1307	+	WBGene00018236	fbxb-71	protein_coding
X	6823885	6825862	1978	-	WBGene00018257	F41B4.1	protein_coding
X	6873359	6874823	1465	-	WBGene00018278	F41C6.4	protein_coding
X	16841038	16842973	1936	+	WBGene00018307	dyla-1	protein_coding
X	16834896	16836404	1509	-	WBGene00018310	F41G4.7	protein_coding
X	16843355	16845024	1670	-	WBGene00018311	F41G4.8	protein_coding
X	7525571	7527433	1863	+	WBGene00018485	F46C8.3	protein_coding
X	5797319	5798790	1472	-	WBGene00018517	F46G11.4	protein_coding
X	7255709	7256991	1283	-	WBGene00018521	F46H5.5	protein_coding
X	3763057	3764395	1339	-	WBGene00018534	F47B7.3	protein_coding
X	3765307	3766652	1346	-	WBGene00018535	F47B7.4	protein_coding
X	9046213	9047448	1236	+	WBGene00018567	prdm-14	protein_coding
X	7493724	7495591	1868	-	WBGene00018605	F48E3.4	protein_coding
X	7501415	7502907	1493	-	WBGene00018606	F48E3.6	protein_coding
X	1095545	1097013	1469	-	WBGene00018634	pigx-1	protein_coding
X	2085288	2086730	1443	+	WBGene00018653	F49H12.2	protein_coding
X	2079836	2081687	1852	+	WBGene00018655	F49H12.4	protein_coding
X	2074450	2075944	1495	+	WBGene00018656	txdc-12.2	protein_coding
X	1949161	1950728	1568	-	WBGene00018684	fbxa-41	protein_coding
X	1973511	1974799	1289	-	WBGene00018687	F52D2.5	protein_coding
X	3085828	3087345	1518	-	WBGene00018702	F52E4.5	protein_coding
X	3100166	3102175	2010	-	WBGene00018704	ztf-13	protein_coding
X	2105610	2107535	1926	+	WBGene00018736	F53B1.3	protein_coding
X	2864229	2865683	1455	+	WBGene00018744	F53B3.6	protein_coding
X	1035548	1037066	1519	+	WBGene00018853	sec-22	protein_coding
X	1023387	1025110	1724	-	WBGene00018855	F55A4.3	protein_coding
X	1037017	1038447	1431	-	WBGene00018859	F55A4.7	protein_coding
X	8344757	8346348	1592	-	WBGene00018885	drd-5	protein_coding
X	862267	863578	1312	-	WBGene00018986	cdo-1	protein_coding
X	2584242	2585755	1514	-	WBGene00019144	H01M10.2	protein_coding
X	1572249	1574010	1762	+	WBGene00019145	H02F09.2	protein_coding
X	1628137	1629454	1318	+	WBGene00019186	fbxb-58	protein_coding
X	17710285	17711698	1414	-	WBGene00019189	H11L12.1	protein_coding
X	8603379	8605058	1680	-	WBGene00019266	H35N09.2	protein_coding
X	1396275	1397616	1342	-	WBGene00019267	H39E20.1	protein_coding
X	2477001	2478923	1923	-	WBGene00019319	K02E10.5	protein_coding
X	2480755	2482770	2016	-	WBGene00019320	K02E10.6	protein_coding
X	4918988	4920992	2005	-	WBGene00019404	K05B2.4	protein_coding
X	3296482	3298031	1550	+	WBGene00019548	K09C4.2	protein_coding
X	17109162	17110655	1494	-	WBGene00019576	lido-5	protein_coding
X	7739653	7741094	1442	+	WBGene00019582	K09F5.1	protein_coding
X	6723743	6725668	1926	-	WBGene00019656	slc-25A10	protein_coding
X	3027180	3029130	1951	-	WBGene00019735	M02F4.1	protein_coding
X	3031783	3033117	1335	+	WBGene00019738	clec-265	protein_coding
X	4969529	4970913	1385	-	WBGene00019760	calu-1	protein_coding
[truncated: 2,996 more rows]

## Sheet: Quantile_3
Chromosome	start	end	Length	strand	Gene_ID	Gene_Name	gene_biotype
V	8552695	8555383	2689	+	WBGene00000054	acr-15	protein_coding
V	8561216	8564345	3130	+	WBGene00000055	acr-16	protein_coding
V	11071690	11074498	2809	-	WBGene00000065	act-3	protein_coding
V	8221488	8223582	2095	+	WBGene00000098	air-1	protein_coding
V	1644169	1647728	3560	+	WBGene00000108	alh-2	protein_coding
V	6427208	6429920	2713	-	WBGene00000110	alh-4	protein_coding
V	1996105	1999581	3477	-	WBGene00000111	alh-5	protein_coding
V	10127492	10130295	2804	-	WBGene00000142	aos-1	protein_coding
V	9737556	9739740	2185	+	WBGene00000172	aqp-4	protein_coding
V	10648446	10651997	3552	+	WBGene00000174	aqp-6	protein_coding
V	10335463	10338355	2893	-	WBGene00000200	arx-2	protein_coding
V	6762467	6765072	2606	-	WBGene00000244	bbs-8	protein_coding
V	12514835	12517248	2414	-	WBGene00000285	cal-1	protein_coding
V	13557104	13559922	2819	+	WBGene00000302	cav-2	protein_coding
V	5421018	5423282	2265	-	WBGene00000373	cyp-14A5	protein_coding
V	13813231	13815350	2120	+	WBGene00000447	ceh-24	protein_coding
V	11661549	11665102	3554	-	WBGene00000449	ceh-27	protein_coding
V	11701764	11705400	3637	-	WBGene00000453	ceh-32	protein_coding
V	3441504	3444877	3374	-	WBGene00000478	cfz-2	protein_coding
V	3757153	3759469	2317	-	WBGene00000498	chk-1	protein_coding
V	2106398	2109434	3037	-	WBGene00000514	ckb-4	protein_coding
V	12060234	12063368	3135	-	WBGene00000533	clh-6	protein_coding
V	11263330	11265652	2323	-	WBGene00000539	cln-3.1	protein_coding
V	8683052	8686160	3109	+	WBGene00000541	cln-3.3	protein_coding
V	11375742	11378006	2265	+	WBGene00000554	cnb-1	protein_coding
V	14457422	14460141	2720	+	WBGene00000592	coh-3	protein_coding
V	20600095	20602540	2446	+	WBGene00000736	col-163	protein_coding
V	9336762	9338858	2097	+	WBGene00000766	coq-6	protein_coding
V	16592572	16595346	2775	-	WBGene00000776	cpl-1	protein_coding
V	10179535	10183154	3620	+	WBGene00000840	cul-5	protein_coding
V	5053635	5056474	2840	+	WBGene00000862	cwp-4	protein_coding
V	11991011	11993723	2713	-	WBGene00000876	cyl-1	protein_coding
V	14684918	14688545	3628	+	WBGene00000915	hsp-90	protein_coding
V	6758135	6760418	2284	+	WBGene00000936	dbl-1	protein_coding
V	20087848	20090743	2896	-	WBGene00000940	dcs-1	protein_coding
V	11412870	11415159	2290	-	WBGene00000951	deg-3	protein_coding
V	11602294	11604563	2270	-	WBGene00000983	dhs-20	protein_coding
V	13940139	13942182	2044	-	WBGene00001062	dpr-1	protein_coding
V	6511583	6515240	3658	-	WBGene00001073	dpy-11	protein_coding
V	12048745	12052181	3437	+	WBGene00001095	dars-2	protein_coding
V	11554630	11558127	3498	+	WBGene00001110	duo-1	protein_coding
V	13126414	13129995	3582	-	WBGene00001137	eat-6	protein_coding
V	6679123	6681573	2451	-	WBGene00001210	egl-46	protein_coding
V	13603276	13606701	3426	-	WBGene00001479	fmo-4	protein_coding
V	5986990	5990483	3494	-	WBGene00001508	fut-8	protein_coding
V	6431333	6433496	2164	-	WBGene00001513	gad-1	protein_coding
V	13912080	13915490	3411	-	WBGene00001552	gcy-32	protein_coding
V	13383019	13385898	2880	-	WBGene00001554	gcy-34	protein_coding
V	16219634	16221917	2284	+	WBGene00001591	glc-1	protein_coding
V	11282572	11286039	3468	+	WBGene00001645	gly-20	protein_coding
V	11174433	11177677	3245	-	WBGene00001663	gpa-1	protein_coding
V	8371005	8374034	3030	+	WBGene00001664	gpa-2	protein_coding
V	9356581	9359774	3194	-	WBGene00001665	gpa-3	protein_coding
V	6852521	6854811	2291	-	WBGene00001672	gpa-10	protein_coding
V	12752603	12754939	2337	-	WBGene00001675	gpa-13	protein_coding
V	9221866	9224354	2489	+	WBGene00001695	grd-6	protein_coding
V	5895321	5898602	3282	+	WBGene00001698	grd-9	protein_coding
V	5530725	5533855	3131	-	WBGene00001710	grl-1	protein_coding
V	11344828	11347012	2185	-	WBGene00001716	grl-7	protein_coding
V	20825559	20827743	2185	+	WBGene00001723	grl-14	protein_coding
V	5485631	5488866	3236	-	WBGene00001727	grl-18	protein_coding
V	2561690	2564645	2956	+	WBGene00001758	gst-10	protein_coding
V	14949777	14952799	3023	+	WBGene00001852	hil-1	protein_coding
V	14090426	14092454	2029	+	WBGene00001864	him-5	protein_coding
V	13176711	13180185	3475	+	WBGene00001874	him-17	protein_coding
V	4824124	4826760	2637	-	WBGene00002010	hsp-6	protein_coding
V	2881393	2883753	2361	+	WBGene00002055	ifc-1	protein_coding
V	11239675	11241792	2118	+	WBGene00002072	ima-1	protein_coding
V	9204661	9207477	2817	-	WBGene00002132	inx-10	protein_coding
V	15244756	15247786	3031	+	WBGene00002211	kin-30	protein_coding
V	13043712	13046154	2443	+	WBGene00002250	lap-2	protein_coding
V	10814106	10816718	2613	+	WBGene00002985	lig-1	protein_coding
V	12252572	12255450	2879	+	WBGene00003075	lrx-1	protein_coding
V	10633058	10635525	2468	+	WBGene00003114	mab-23	protein_coding
V	15056719	15059599	2881	-	WBGene00003155	mcm-3	protein_coding
V	4347166	4349768	2603	+	WBGene00003159	mcm-7	protein_coding
V	9541782	9544226	2445	-	WBGene00003160	mdf-1	protein_coding
V	11446685	11449249	2565	+	WBGene00003248	mig-17	protein_coding
V	8355988	8358185	2198	+	WBGene00003395	mom-2	protein_coding
V	10733925	10736868	2944	-	WBGene00003405	mre-11	protein_coding
V	11474699	11478007	3309	+	WBGene00003541	nas-22	protein_coding
V	10918857	10921847	2991	-	WBGene00003549	nas-31	protein_coding
V	4983747	4987197	3451	-	WBGene00003573	ncx-8	protein_coding
V	7930475	7933098	2624	-	WBGene00003575	ncx-10	protein_coding
V	2662964	2665003	2040	-	WBGene00003579	ndx-2	protein_coding
V	8961878	8964105	2228	-	WBGene00003634	nhr-44	protein_coding
V	15997726	16000631	2906	-	WBGene00003640	nhr-50	protein_coding
V	15677522	15680074	2553	+	WBGene00003642	nhr-52	protein_coding
V	478162	480693	2532	+	WBGene00003645	nhr-55	protein_coding
V	2219004	2221305	2302	+	WBGene00003646	nhr-56	protein_coding
V	4131889	4135102	3214	+	WBGene00003647	nhr-57	protein_coding
V	2276013	2278265	2253	-	WBGene00003649	nhr-59	protein_coding
V	15770268	15773241	2974	-	WBGene00003650	nhr-60	protein_coding
V	16002588	16004735	2148	+	WBGene00003653	nhr-63	protein_coding
V	11573440	11575709	2270	+	WBGene00003658	nhr-68	protein_coding
V	18616587	18620243	3657	+	WBGene00003660	nhr-70	protein_coding
V	15876732	15879608	2877	-	WBGene00003674	nhr-84	protein_coding
V	3536135	3538407	2273	-	WBGene00003683	nhr-93	protein_coding
V	7684052	7686335	2284	-	WBGene00003684	nhr-94	protein_coding
V	453869	457071	3203	+	WBGene00003688	nhr-98	protein_coding
V	474778	477155	2378	+	WBGene00003689	nhr-99	protein_coding
V	11570476	11572549	2074	+	WBGene00003691	nhr-101	protein_coding
V	15874093	15876408	2316	-	WBGene00003692	nhr-102	protein_coding
V	1622264	1624440	2177	-	WBGene00003700	nhr-110	protein_coding
V	4187202	4190008	2807	+	WBGene00003704	nhr-114	protein_coding
V	2292540	2294800	2261	+	WBGene00003705	nhr-115	protein_coding
V	16912234	16915350	3117	+	WBGene00003706	nhr-116	protein_coding
V	1619415	1621520	2106	-	WBGene00003707	nhr-117	protein_coding
V	4407819	4410280	2462	+	WBGene00003708	nhr-118	protein_coding
V	451451	453759	2309	+	WBGene00003713	nhr-123	protein_coding
V	4322121	4325515	3395	-	WBGene00003715	nhr-125	protein_coding
V	2222064	2225321	3258	+	WBGene00003718	nhr-128	protein_coding
V	480814	483339	2526	-	WBGene00003720	nhr-130	protein_coding
V	494370	497297	2928	+	WBGene00003721	nhr-131	protein_coding
V	2231223	2233381	2159	+	WBGene00003724	nhr-134	protein_coding
V	7091714	7093770	2057	-	WBGene00003725	nhr-135	protein_coding
V	12107141	12109313	2173	+	WBGene00003726	nhr-136	protein_coding
V	4219642	4222233	2592	+	WBGene00003747	nlp-9	protein_coding
V	19606180	19608419	2240	+	WBGene00003763	nlp-25	protein_coding
V	13828267	13830907	2641	+	WBGene00003812	nrf-5	protein_coding
V	8546174	8548880	2707	+	WBGene00003816	asns-1	protein_coding
V	14411649	14415014	3366	-	WBGene00003834	nxf-1	protein_coding
V	13246324	13249536	3213	-	WBGene00003850	odr-3	protein_coding
V	11924621	11927446	2826	-	WBGene00003886	osm-6	protein_coding
V	4755979	4758587	2609	+	WBGene00003994	pgl-3	protein_coding
V	6662191	6665813	3623	-	WBGene00004062	pmp-5	protein_coding
V	10702549	10704909	2361	+	WBGene00004083	pph-1	protein_coding
V	5049607	5052214	2608	+	WBGene00004136	pqn-51	protein_coding
V	11226314	11228703	2390	-	WBGene00004152	pqn-70	protein_coding
V	6966396	6970000	3605	-	WBGene00004229	ptr-15	protein_coding
V	16792759	16794952	2194	-	WBGene00004248	pus-1	protein_coding
V	15061488	15064087	2600	-	WBGene00004308	rap-2	protein_coding
V	13598331	13600982	2652	-	WBGene00004328	rdy-2	protein_coding
V	14642667	14645979	3313	-	WBGene00004337	rfc-1	protein_coding
V	5428160	5430431	2272	+	WBGene00004358	rhr-1	protein_coding
V	11727900	11730160	2261	-	WBGene00004359	rhr-2	protein_coding
V	12192273	12194366	2094	+	WBGene00004384	rnp-1	protein_coding
V	10252838	10255055	2218	-	WBGene00004405	rop-1	protein_coding
V	20798218	20801207	2990	+	WBGene00004748	sdf-9	protein_coding
V	12560732	12563383	2652	+	WBGene00004759	sel-1	protein_coding
V	13819361	13822980	3620	+	WBGene00004767	sel-10	protein_coding
V	11767328	11769899	2572	+	WBGene00004768	sel-11	protein_coding
V	10438330	10440823	2494	-	WBGene00004909	snf-10	protein_coding
V	11305070	11308446	3377	-	WBGene00004910	snf-11	protein_coding
V	6785451	6787864	2414	+	WBGene00004975	spe-39	protein_coding
V	8126663	8129352	2690	-	WBGene00005006	spr-1	protein_coding
V	13617717	13619852	2136	-	WBGene00005089	srd-11	protein_coding
V	13430651	13432714	2064	-	WBGene00005095	srd-17	protein_coding
V	2419081	2421583	2503	+	WBGene00005137	srd-60	protein_coding
V	2502764	2504914	2151	+	WBGene00005138	srd-61	protein_coding
V	20454111	20456487	2377	+	WBGene00005147	srd-70	protein_coding
V	2423287	2426206	2920	-	WBGene00005148	srd-71	protein_coding
V	5342094	5345519	3426	-	WBGene00005182	srg-25	protein_coding
V	6951550	6953897	2348	-	WBGene00005188	srg-31	protein_coding
V	18562179	18564886	2708	-	WBGene00005191	srg-34	protein_coding
V	11152333	11155653	3321	-	WBGene00005195	srg-38	protein_coding
V	879471	881693	2223	+	WBGene00005210	srg-53	protein_coding
V	14921988	14924204	2217	-	WBGene00005211	srg-54	protein_coding
V	2735531	2738274	2744	-	WBGene00005213	srg-56	protein_coding
V	2732177	2734460	2284	-	WBGene00005214	srg-57	protein_coding
V	2722903	2725325	2423	-	WBGene00005216	srg-59	protein_coding
V	1682579	1685162	2584	+	WBGene00005229	srh-3	protein_coding
V	4005519	4007565	2047	+	WBGene00005234	srh-8	protein_coding
V	12291861	12294196	2336	+	WBGene00005241	srh-16	protein_coding
V	4922324	4924594	2271	+	WBGene00005247	srh-22	protein_coding
V	6769634	6771745	2112	-	WBGene00005253	srh-30	protein_coding
V	17707322	17709823	2502	+	WBGene00005254	srh-31	protein_coding
V	17701212	17703285	2074	+	WBGene00005255	srh-32	protein_coding
V	2819581	2821668	2088	-	WBGene00005259	srh-36	protein_coding
V	2920600	2922694	2095	-	WBGene00005261	srh-38	protein_coding
V	217147	219513	2367	+	WBGene00005299	srh-78	protein_coding
V	219932	222776	2845	+	WBGene00005301	srh-80	protein_coding
V	17017087	17019800	2714	+	WBGene00005316	srh-97	protein_coding
V	17162900	17165509	2610	-	WBGene00005321	srh-102	protein_coding
V	17252931	17255128	2198	-	WBGene00005335	srh-116	protein_coding
V	17395674	17398034	2361	+	WBGene00005339	srh-120	protein_coding
V	2893276	2895584	2309	+	WBGene00005344	srh-127	protein_coding
V	18014641	18017326	2686	-	WBGene00005351	srh-134	protein_coding
V	15848035	15850326	2292	-	WBGene00005363	srh-147	protein_coding
V	17439706	17441892	2187	+	WBGene00005370	srh-154	protein_coding
V	15386746	15388870	2125	-	WBGene00005386	srh-170	protein_coding
V	19975192	19978320	3129	-	WBGene00005398	srh-183	protein_coding
V	4311993	4315157	3165	-	WBGene00005405	srh-192	protein_coding
V	4078061	4081383	3323	-	WBGene00005421	srh-211	protein_coding
V	3592738	3595036	2299	-	WBGene00005423	srh-213	protein_coding
V	16825290	16827585	2296	-	WBGene00005426	srh-216	protein_coding
V	20193089	20195551	2463	-	WBGene00005427	srh-217	protein_coding
V	15495469	15497567	2099	+	WBGene00005429	srh-219	protein_coding
V	20049365	20052609	3245	+	WBGene00005440	srh-233	protein_coding
V	2865199	2867328	2130	+	WBGene00005447	srh-240	protein_coding
V	2618950	2621979	3030	-	WBGene00005477	srh-271	protein_coding
V	16192414	16194638	2225	+	WBGene00005484	srh-279	protein_coding
V	17767549	17769621	2073	+	WBGene00005489	srh-284	protein_coding
V	17841483	17844206	2724	-	WBGene00005490	srh-286	protein_coding
V	17805623	17808611	2989	+	WBGene00005495	srh-291	protein_coding
V	15330614	15332774	2161	+	WBGene00005499	srh-295	protein_coding
V	17810353	17812794	2442	+	WBGene00005500	srh-296	protein_coding
V	17818867	17821003	2137	+	WBGene00005502	srh-298	protein_coding
V	748344	750467	2124	+	WBGene00005516	sri-4	protein_coding
V	17001467	17003587	2121	+	WBGene00005521	sri-9	protein_coding
V	18802995	18806509	3515	-	WBGene00005522	sri-10	protein_coding
V	10257812	10260560	2749	-	WBGene00005530	sri-18	protein_coding
V	15217005	15219320	2316	+	WBGene00005537	sri-25	protein_coding
V	19987984	19990504	2521	+	WBGene00005579	sri-67	protein_coding
V	7369708	7372131	2424	+	WBGene00005602	srj-14	protein_coding
V	1962815	1964906	2092	-	WBGene00005603	srj-15	protein_coding
V	1451634	1454340	2707	+	WBGene00005611	srj-23	protein_coding
V	736803	738870	2068	-	WBGene00005612	srj-24	protein_coding
V	18421097	18423477	2381	+	WBGene00005614	srj-26	protein_coding
V	882176	884424	2249	-	WBGene00005622	srj-38	protein_coding
V	4101867	4103893	2027	+	WBGene00005624	srj-40	protein_coding
V	2846250	2848340	2091	-	WBGene00005628	srj-49	protein_coding
V	8183684	8185879	2196	+	WBGene00005649	srp-8	protein_coding
V	19213667	19217176	3510	-	WBGene00005653	srr-2	protein_coding
V	5019224	5022363	3140	+	WBGene00005655	srr-4	protein_coding
V	5012803	5015219	2417	+	WBGene00005657	srr-6	protein_coding
V	9843866	9846161	2296	+	WBGene00005671	sru-8	protein_coding
V	15970376	15972584	2209	-	WBGene00005686	sru-23	protein_coding
V	667896	671442	3547	-	WBGene00005687	sru-24	protein_coding
V	672245	674313	2069	-	WBGene00005688	sru-25	protein_coding
V	19706285	19708949	2665	-	WBGene00005714	srv-3	protein_coding
V	16372417	16374776	2360	-	WBGene00005745	srv-34	protein_coding
V	3808636	3810708	2073	+	WBGene00005753	srw-6	protein_coding
V	19836442	19839342	2901	+	WBGene00005785	srw-38	protein_coding
V	20169480	20172041	2562	-	WBGene00005786	srw-39	protein_coding
V	16697478	16699773	2296	+	WBGene00005788	srw-41	protein_coding
V	16680281	16682656	2376	+	WBGene00005791	srw-44	protein_coding
V	7417660	7419828	2169	+	WBGene00005814	srw-67	protein_coding
V	18431750	18434284	2535	+	WBGene00005829	srw-82	protein_coding
V	19381268	19384760	3493	+	WBGene00005831	srw-84	protein_coding
V	1722266	1725261	2996	+	WBGene00005848	srw-101	protein_coding
V	1717192	1719473	2282	+	WBGene00005850	srw-103	protein_coding
V	606781	608944	2164	-	WBGene00005856	srw-109	protein_coding
V	560195	562956	2762	+	WBGene00005898	srx-7	protein_coding
V	17796200	17798889	2690	-	WBGene00005909	srx-18	protein_coding
V	3634559	3637186	2628	-	WBGene00005932	srx-41	protein_coding
V	16017971	16020066	2096	+	WBGene00005934	srx-43	protein_coding
V	16020342	16022652	2311	+	WBGene00005935	srx-44	protein_coding
V	4663616	4665751	2136	-	WBGene00005964	srx-73	protein_coding
V	4658949	4662500	3552	-	WBGene00005965	srx-74	protein_coding
V	15095049	15097452	2404	+	WBGene00005969	srx-78	protein_coding
V	11589733	11592931	3199	+	WBGene00005973	srx-82	protein_coding
V	13367324	13370091	2768	+	WBGene00006016	srx-125	protein_coding
V	13834251	13836655	2405	+	WBGene00006020	srx-129	protein_coding
V	13859206	13861402	2197	+	WBGene00006026	srx-135	protein_coding
V	4474843	4476996	2154	+	WBGene00006101	str-35	protein_coding
V	2877804	2879901	2098	-	WBGene00006104	str-39	protein_coding
V	17718947	17721293	2347	+	WBGene00006137	str-77	protein_coding
V	17668831	17671330	2500	+	WBGene00006148	str-89	protein_coding
V	7136327	7138420	2094	-	WBGene00006163	str-112	protein_coding
V	3664871	3666987	2117	-	WBGene00006164	str-113	protein_coding
V	2431805	2434725	2921	+	WBGene00006171	str-120	protein_coding
V	252326	254691	2366	-	WBGene00006172	str-121	protein_coding
V	8065780	8067900	2121	-	WBGene00006188	str-140	protein_coding
V	8093332	8095478	2147	-	WBGene00006193	str-146	protein_coding
V	2557797	2560739	2943	-	WBGene00006200	str-154	protein_coding
V	15130384	15132523	2140	-	WBGene00006215	str-171	protein_coding
V	12714503	12716547	2045	-	WBGene00006222	str-178	protein_coding
V	12716616	12718722	2107	-	WBGene00006225	str-181	protein_coding
V	4948935	4951024	2090	+	WBGene00006242	str-209	protein_coding
V	1636159	1639281	3123	+	WBGene00006253	str-222	protein_coding
V	3900497	3902558	2062	-	WBGene00006260	str-229	protein_coding
V	2161500	2163835	2336	-	WBGene00006281	str-255	protein_coding
V	2509636	2513268	3633	+	WBGene00006284	str-258	protein_coding
V	3527182	3530413	3232	+	WBGene00006286	str-260	protein_coding
V	8157746	8159872	2127	+	WBGene00006309	sul-2	protein_coding
V	11764904	11767222	2319	+	WBGene00006373	syx-5	protein_coding
V	16404274	16407701	3428	+	WBGene00006375	syp-1	protein_coding
V	9144619	9146899	2281	-	WBGene00006418	spl-2	protein_coding
V	13676022	13678587	2566	-	WBGene00006442	tag-65	protein_coding
V	11036461	11039429	2969	-	WBGene00006443	pak-2	protein_coding
V	10532890	10536388	3499	-	WBGene00006460	ppm-1.A	protein_coding
V	9707771	9709814	2044	-	WBGene00006470	tag-120	protein_coding
V	12761044	12763375	2332	-	WBGene00006512	abcf-1	protein_coding
V	18998345	19000918	2574	+	WBGene00006567	tgt-2	protein_coding
V	4726721	4730161	3441	-	WBGene00006570	tig-2	protein_coding
V	1989471	1992918	3448	-	WBGene00006589	tnt-4	protein_coding
V	14183123	14185612	2490	-	WBGene00006613	trm-1	protein_coding
V	20858727	20861153	2427	-	WBGene00006622	try-4	protein_coding
V	19154106	19157718	3613	+	WBGene00006639	tsp-13	protein_coding
V	10667584	10670890	3307	+	WBGene00006667	twk-12	protein_coding
V	12265707	12269322	3616	-	WBGene00006677	twk-24	protein_coding
V	20862981	20865795	2815	+	WBGene00006687	twk-35	protein_coding
V	17743651	17747059	3409	-	WBGene00006688	twk-36	protein_coding
V	18686321	18689762	3442	-	WBGene00006714	ubc-19	protein_coding
V	6506752	6508803	2052	-	WBGene00006723	ubh-3	protein_coding
V	9334298	9336671	2374	+	WBGene00006729	ucp-4	protein_coding
V	8936359	8939684	3326	+	WBGene00006760	unc-23	protein_coding
V	14373074	14375881	2808	+	WBGene00006775	unc-39	protein_coding
V	14731064	14734237	3174	-	WBGene00006795	unc-61	protein_coding
V	8031411	8035025	3615	+	WBGene00006935	vars-1	protein_coding
V	15334754	15337505	2752	-	WBGene00006953	wrt-7	protein_coding
V	15342054	15344581	2528	-	WBGene00006954	wrt-8	protein_coding
V	14980237	14982671	2435	+	WBGene00006960	xbx-1	protein_coding
V	7081545	7084662	3118	-	WBGene00007029	mys-1	protein_coding
V	8594914	8597469	2556	+	WBGene00007055	tag-196	protein_coding
V	10395663	10397820	2158	+	WBGene00007072	ugt-1	protein_coding
V	10398801	10401307	2507	+	WBGene00007073	ugt-2	protein_coding
V	14146499	14148839	2341	+	WBGene00007082	acs-10	protein_coding
V	10315248	10317394	2147	-	WBGene00007100	asps-1	protein_coding
V	10317492	10319534	2043	-	WBGene00007101	B0024.11	protein_coding
V	11733540	11736996	3457	-	WBGene00007117	spe-42	protein_coding
V	11731120	11733472	2353	-	WBGene00007118	npp-22	protein_coding
V	20476747	20479089	2343	-	WBGene00007119	calf-1	protein_coding
V	20493924	20497345	3422	+	WBGene00007122	B0250.5	protein_coding
V	20473022	20476061	3040	-	WBGene00007124	B0250.7	protein_coding
V	9654755	9658120	3366	+	WBGene00007140	cyp-29A4	protein_coding
V	9658862	9661614	2753	-	WBGene00007141	pitr-4	protein_coding
V	13116488	13120131	3644	+	WBGene00007150	acly-2	protein_coding
V	13134903	13138101	3199	-	WBGene00007153	clec-41	protein_coding
V	15602882	15605145	2264	-	WBGene00007163	fbxa-154	protein_coding
V	15600307	15602353	2047	-	WBGene00007166	fbxa-152	protein_coding
V	18328972	18331186	2215	-	WBGene00007183	B0462.4	protein_coding
V	15080134	15082441	2308	-	WBGene00007237	C01G10.10	protein_coding
V	11286414	11288541	2128	+	WBGene00007281	C03E10.3	protein_coding
V	13899513	13902653	3141	+	WBGene00007361	oac-3	protein_coding
V	15479383	15481465	2083	-	WBGene00007367	nhr-150	protein_coding
V	15476060	15478749	2690	-	WBGene00007368	C06B8.2	protein_coding
V	15489883	15492618	2736	-	WBGene00007370	str-264	protein_coding
V	15992150	15995642	3493	+	WBGene00007381	C06C6.7	protein_coding
V	11125222	11127303	2082	+	WBGene00007386	C06H2.2	protein_coding
V	11127497	11130095	2599	+	WBGene00007387	jmjd-5	protein_coding
V	17899803	17901906	2104	+	WBGene00007393	fbxa-157	protein_coding
V	10102592	10104964	2373	-	WBGene00007422	ugt-17	protein_coding
V	10109833	10112287	2455	-	WBGene00007424	C08B6.3	protein_coding
V	10114629	10117413	2785	+	WBGene00007425	C08B6.4	protein_coding
V	10117765	10119791	2027	+	WBGene00007426	C08B6.5	protein_coding
V	10125498	10127570	2073	+	WBGene00007430	C08B6.10	protein_coding
V	10107609	10109926	2318	+	WBGene00007431	C08B6.11	protein_coding
V	18353510	18355842	2333	-	WBGene00007438	C08E8.2	protein_coding
V	10236158	10238866	2709	-	WBGene00007534	fubl-1	protein_coding
V	10223513	10225710	2198	-	WBGene00007536	daf-36	protein_coding
V	12104220	12106537	2318	+	WBGene00007546	nhr-153	protein_coding
V	12101293	12103396	2104	+	WBGene00007547	nhr-154	protein_coding
V	12109046	12111805	2760	-	WBGene00007548	C13C4.4	protein_coding
V	12114993	12117443	2451	+	WBGene00007549	spin-1	protein_coding
V	12121574	12124939	3366	+	WBGene00007550	C13C4.6	protein_coding
V	12523638	12525738	2101	-	WBGene00007552	dyf-4	protein_coding
V	18169043	18171668	2626	-	WBGene00007572	C14A6.8	protein_coding
V	12596387	12599157	2771	-	WBGene00007586	ril-2	protein_coding
V	12742041	12744171	2131	+	WBGene00007605	hrg-7	protein_coding
V	12745201	12747463	2263	-	WBGene00007606	C15C8.4	protein_coding
V	14409074	14412003	2930	+	WBGene00007614	gnrr-2	protein_coding
V	14417903	14420144	2242	+	WBGene00007615	set-31	protein_coding
V	17535586	17538375	2790	-	WBGene00007675	C18D4.6	protein_coding
V	15052650	15056291	3642	+	WBGene00007717	C25D7.5	protein_coding
V	19407712	19410857	3146	-	WBGene00007725	C25F9.5	protein_coding
V	13305138	13307294	2157	+	WBGene00007748	C26E1.2	protein_coding
V	13301833	13304785	2953	+	WBGene00007749	ceh-79	protein_coding
V	12140925	12144293	3369	+	WBGene00007755	C27A7.3	protein_coding
V	9983919	9986277	2359	-	WBGene00007786	rmd-2	protein_coding
V	15354901	15357571	2671	+	WBGene00007807	C29F3.7	protein_coding
V	16292709	16295600	2892	+	WBGene00007829	oac-5	protein_coding
V	16302717	16306159	3443	+	WBGene00007833	oac-6	protein_coding
V	16307553	16309688	2136	+	WBGene00007834	srxa-7	protein_coding
V	18186063	18188428	2366	-	WBGene00007851	clec-245	protein_coding
V	10644907	10647143	2237	-	WBGene00007863	C32C4.3	protein_coding
V	13090405	13092553	2149	+	WBGene00007909	C34B4.4	protein_coding
V	13257097	13259311	2215	-	WBGene00007931	C34D1.4	protein_coding
V	10493409	10496477	3069	+	WBGene00007946	ugt-33	protein_coding
V	10499355	10501395	2041	-	WBGene00007947	C35A5.3	protein_coding
V	10497033	10499416	2384	+	WBGene00007948	C35A5.4	protein_coding
V	10505853	10508075	2223	+	WBGene00007949	C35A5.5	protein_coding
V	10526184	10528444	2261	+	WBGene00007953	hda-11	protein_coding
V	17563210	17566003	2794	-	WBGene00008009	fbxa-171	protein_coding
V	17559246	17561612	2367	+	WBGene00008014	fbxa-172	protein_coding
V	17555854	17558477	2624	-	WBGene00008015	fbxa-174	protein_coding
V	19313275	19316512	3238	+	WBGene00008071	fbxb-64	protein_coding
V	12827519	12830114	2596	+	WBGene00008097	ugt-15	protein_coding
V	12842489	12845347	2859	-	WBGene00008101	C44H9.6	protein_coding
V	17769653	17773208	3556	-	WBGene00008126	sre-21	protein_coding
V	17774246	17777227	2982	-	WBGene00008127	ddo-1	protein_coding
V	17780269	17783642	3374	-	WBGene00008128	srab-12	protein_coding
V	14680314	14683746	3433	+	WBGene00008142	C47E8.3	protein_coding
V	14689110	14691976	2867	+	WBGene00008144	gasr-8	protein_coding
V	14663306	14666013	2708	+	WBGene00008146	C47E8.9	protein_coding
V	13310186	13312260	2075	-	WBGene00008218	nasp-2	protein_coding
V	13313573	13315821	2249	+	WBGene00008219	C50B6.3	protein_coding
V	13322365	13324983	2619	-	WBGene00008220	C50B6.7	protein_coding
V	13331114	13333871	2758	-	WBGene00008221	nhr-168	protein_coding
V	13340240	13343040	2801	+	WBGene00008223	lgc-48	protein_coding
V	9526793	9529250	2458	+	WBGene00008229	C50F4.1	protein_coding
V	9531801	9534537	2737	+	WBGene00008230	pfk-1.2	protein_coding
V	9537575	9539738	2164	-	WBGene00008236	C50F4.12	protein_coding
V	9547602	9549836	2235	-	WBGene00008237	nstp-10	protein_coding
V	9916965	9919167	2203	+	WBGene00008240	C50H2.4	protein_coding
V	10148652	10150891	2240	+	WBGene00008247	srsx-26	protein_coding
V	10150028	10152248	2221	+	WBGene00008248	srsx-27	protein_coding
V	10152578	10154832	2255	+	WBGene00008249	srsx-28	protein_coding
V	10164135	10166468	2334	-	WBGene00008252	C51E3.6	protein_coding
V	10145953	10148977	3025	+	WBGene00008254	C51E3.9	protein_coding
V	11982901	11985484	2584	-	WBGene00008258	mans-2	protein_coding
V	14542905	14545866	2962	-	WBGene00008266	C53A5.6	protein_coding
V	12441663	12443854	2192	-	WBGene00008301	pals-39	protein_coding
V	18811005	18813481	2477	+	WBGene00008308	C54E10.3	protein_coding
V	11509060	11512321	3262	+	WBGene00008331	ttll-5	protein_coding
V	11505347	11508271	2925	+	WBGene00008339	C55A6.10	protein_coding
V	13553379	13556397	3019	-	WBGene00008345	C56A3.6	protein_coding
V	10802336	10804474	2139	-	WBGene00008379	secs-1	protein_coding
V	14094105	14097115	3011	+	WBGene00008395	D1086.8	protein_coding
V	14104270	14106330	2061	+	WBGene00008396	D1086.9	protein_coding
V	17921772	17924185	2414	+	WBGene00008442	E01B7.2	protein_coding
V	12563487	12565801	2315	+	WBGene00008452	mrps-5	protein_coding
V	14984893	14987572	2680	+	WBGene00008521	F02D8.4	protein_coding
V	11256521	11258996	2476	-	WBGene00008551	lgc-36	protein_coding
V	9460593	9462705	2113	-	WBGene00008556	F07D3.3	protein_coding
V	14469231	14472448	3218	+	WBGene00008594	clec-57	protein_coding
V	14474399	14476794	2396	+	WBGene00008595	clec-56	protein_coding
V	14476903	14479003	2101	+	WBGene00008596	clec-54	protein_coding
V	14479279	14482317	3039	+	WBGene00008597	clec-55	protein_coding
V	13850470	13853199	2730	+	WBGene00008627	hpx-2	protein_coding
V	13873195	13875888	2694	+	WBGene00008629	cpt-5	protein_coding
V	16149105	16151899	2795	+	WBGene00008634	F10A3.4	protein_coding
V	12020326	12023859	3534	+	WBGene00008644	F10C2.3	protein_coding
V	12045432	12048631	3200	+	WBGene00008646	F10C2.5	protein_coding
V	12053898	12056428	2531	+	WBGene00008647	F10C2.7	protein_coding
V	9508132	9510377	2246	+	WBGene00008669	acs-14	protein_coding
V	16198316	16201054	2739	+	WBGene00008673	F11A5.5	protein_coding
V	16206849	16209937	3089	-	WBGene00008676	oac-15	protein_coding
V	16214890	16217706	2817	+	WBGene00008677	F11A5.9	protein_coding
V	18757924	18760274	2351	-	WBGene00008698	F11D11.3	protein_coding
V	16396039	16398623	2585	+	WBGene00008727	F13A7.12	protein_coding
V	16049477	16051717	2241	+	WBGene00008821	best-12	protein_coding
V	16069238	16071318	2081	+	WBGene00008829	cyp-35D1	protein_coding
V	15011870	15014264	2395	-	WBGene00008832	obr-2	protein_coding
V	13010275	13013258	2984	-	WBGene00008849	try-10	protein_coding
V	13014144	13016641	2498	+	WBGene00008850	F15B9.6	protein_coding
V	12988556	12992184	3629	+	WBGene00008851	F15B9.8	protein_coding
V	10426570	10428708	2139	-	WBGene00008871	tag-314	protein_coding
V	10403181	10406413	3233	-	WBGene00008874	F15H10.7	protein_coding
V	18191412	18194168	2757	+	WBGene00008891	clec-42	protein_coding
V	18195306	18197863	2558	+	WBGene00008893	F16H6.3	protein_coding
V	18207064	18209171	2108	-	WBGene00008897	F16H6.7	protein_coding
V	18213677	18216275	2599	-	WBGene00008898	F16H6.8	protein_coding
V	10965719	10967922	2204	+	WBGene00008920	eef-1G	protein_coding
V	10934224	10936920	2697	-	WBGene00008923	F17C11.12	protein_coding
V	12757565	12759760	2196	-	WBGene00008936	papl-1	protein_coding
V	20158523	20161647	3125	+	WBGene00008945	F19B2.6	protein_coding
V	20183843	20186679	2837	-	WBGene00008947	srz-16	protein_coding
V	17464578	17466730	2153	+	WBGene00008984	F20E11.7	protein_coding
V	13765926	13768488	2563	-	WBGene00008987	F20G2.3	protein_coding
V	13771509	13773700	2192	+	WBGene00008988	F20G2.5	protein_coding
V	13763077	13765997	2921	+	WBGene00008989	F20G2.6	protein_coding
V	19253820	19256762	2943	+	WBGene00009018	F21D9.4	protein_coding
V	16227121	16229996	2876	-	WBGene00009028	F21H7.2	protein_coding
V	16232651	16235235	2585	-	WBGene00009029	F21H7.3	protein_coding
V	16253907	16256495	2589	-	WBGene00009032	bgnt-1.3	protein_coding
V	16100680	16102750	2071	+	WBGene00009048	cth-1	protein_coding
V	16094584	16097320	2737	+	WBGene00009049	F22B8.7	protein_coding
V	10453857	10457347	3491	-	WBGene00009058	F22E12.1	protein_coding
V	10462282	10464660	2379	+	WBGene00009059	chw-1	protein_coding
V	14449697	14452976	3280	+	WBGene00009084	F23B12.7	protein_coding
V	9577291	9580046	2756	+	WBGene00009099	F25B3.2	protein_coding
V	9565337	9568807	3471	-	WBGene00009101	F25B3.4	protein_coding
V	9580041	9582644	2604	-	WBGene00009103	rtfo-1	protein_coding
V	20904169	20907433	3265	+	WBGene00009106	acs-12	protein_coding
V	10530617	10532825	2209	-	WBGene00009107	txt-10	protein_coding
V	13459459	13461803	2345	+	WBGene00009137	bath-39	protein_coding
V	16407963	16410270	2308	+	WBGene00009148	F26D2.3	protein_coding
V	20559162	20561895	2734	-	WBGene00009166	F26F2.1	protein_coding
V	20574614	20577636	3023	+	WBGene00009171	clec-263	protein_coding
V	12450805	12453343	2539	+	WBGene00009200	F28C1.1	protein_coding
V	15567394	15569897	2504	+	WBGene00009221	acs-2	protein_coding
V	16278116	16280616	2501	+	WBGene00009226	cyp-37B1	protein_coding
V	16282936	16285894	2959	-	WBGene00009229	F28G4.4	protein_coding
V	10754404	10756798	2395	-	WBGene00009239	irld-6	protein_coding
V	10750955	10754150	3196	-	WBGene00009240	F28H7.7	protein_coding
V	10760575	10762795	2221	-	WBGene00009242	sre-6	protein_coding
V	10654415	10656978	2564	-	WBGene00009255	ugt-34	protein_coding
V	20838865	20841582	2718	+	WBGene00009289	exos-7	protein_coding
V	20847702	20850701	3000	-	WBGene00009291	clec-264	protein_coding
V	10904048	10906771	2724	+	WBGene00009325	F32D8.15	protein_coding
V	10880832	10883404	2573	+	WBGene00009326	F32D8.1	protein_coding
V	10883778	10886102	2325	+	WBGene00009327	F32D8.2	protein_coding
V	10898435	10900700	2266	+	WBGene00009331	F32D8.7	protein_coding
V	10906760	10909171	2412	-	WBGene00009333	zzz-1	protein_coding
V	10888187	10891027	2841	-	WBGene00009334	F32D8.12	protein_coding
V	10557976	10560788	2813	+	WBGene00009340	best-14	protein_coding
V	13360554	13363357	2804	+	WBGene00009350	F32H5.4	protein_coding
V	11604482	11606524	2043	-	WBGene00009383	F35B12.3	protein_coding
V	11625900	11629272	3373	-	WBGene00009389	F35B12.10	protein_coding
V	15923279	15926154	2876	+	WBGene00009424	F35E8.13	protein_coding
V	13722233	13724881	2649	-	WBGene00009426	F35E12.2	protein_coding
V	13727761	13730784	3024	-	WBGene00009431	dct-17	protein_coding
V	13749181	13751891	2711	-	WBGene00009432	cld-9	protein_coding
V	13745695	13748758	3064	-	WBGene00009434	F35E12.10	protein_coding
V	16499352	16502803	3452	+	WBGene00009469	F36D3.1	protein_coding
V	15957398	15959554	2157	+	WBGene00009485	F36G9.3	protein_coding
V	15978714	15981779	3066	+	WBGene00009488	oac-20	protein_coding
V	15983294	15986676	3383	+	WBGene00009489	F36G9.13	protein_coding
V	11549107	11551613	2507	+	WBGene00009534	F38B7.3	protein_coding
V	17159874	17162615	2742	+	WBGene00009571	F40D4.12	protein_coding
V	9725984	9729512	3529	-	WBGene00009583	aagr-3	protein_coding
V	9711447	9713632	2186	-	WBGene00009586	F40F9.10	protein_coding
V	14257113	14259231	2119	+	WBGene00009596	sre-8	protein_coding
V	13062136	13064195	2060	+	WBGene00009630	F42E8.1	protein_coding
V	16103894	16105952	2059	+	WBGene00009706	argk-1	protein_coding
V	16133780	16137143	3364	-	WBGene00009708	F44G3.7	protein_coding
V	9772285	9774918	2634	+	WBGene00009768	F46B6.2	protein_coding
V	9779611	9783069	3459	-	WBGene00009770	F46B6.5	protein_coding
V	9786993	9789707	2715	-	WBGene00009772	ztf-7	protein_coding
V	11669338	11672597	3260	-	WBGene00009790	lgc-44	protein_coding
V	14325795	14327876	2082	-	WBGene00009806	F47B8.5	protein_coding
V	11323965	11326964	3000	-	WBGene00009829	tmed-10	protein_coding
V	11313362	11316901	3540	-	WBGene00009830	cutl-18	protein_coding
V	17342791	17344926	2136	-	WBGene00009839	fbxa-188	protein_coding
V	17345214	17347781	2568	+	WBGene00009840	fbxa-189	protein_coding
V	17350387	17352870	2484	-	WBGene00009841	fbxa-134	protein_coding
V	16867678	16869840	2163	-	WBGene00009859	clec-33	protein_coding
V	17023241	17025527	2287	+	WBGene00009908	F49H6.5	protein_coding
V	17032812	17035950	3139	-	WBGene00009912	srz-94	protein_coding
V	10992089	10994974	2886	+	WBGene00009965	frpr-9	protein_coding
V	13784090	13787352	3263	-	WBGene00009974	F53C11.4	protein_coding
V	13800973	13804281	3309	-	WBGene00009976	swan-2	protein_coding
V	13804395	13807237	2843	-	WBGene00009977	swan-1	protein_coding
V	13403961	13406114	2154	-	WBGene00009979	cutl-1	protein_coding
V	13622107	13624524	2418	-	WBGene00009993	F53F4.11	protein_coding
V	13627573	13629841	2269	+	WBGene00009996	sde-2	protein_coding
V	20685683	20688835	3153	+	WBGene00009998	klf-2	protein_coding
V	11770467	11773495	3029	+	WBGene00010077	F55A11.4	protein_coding
V	11784587	11787443	2857	-	WBGene00010080	F55A11.7	protein_coding
V	13823052	13825226	2175	+	WBGene00010089	hpo-31	protein_coding
V	12288922	12291658	2737	-	WBGene00010097	srpa-68	protein_coding
V	19290574	19293125	2552	-	WBGene00010102	F55C9.5	protein_coding
V	19293632	19296823	3192	-	WBGene00010103	F55C9.6	protein_coding
V	19306594	19309691	3098	-	WBGene00010107	F55C9.11	protein_coding
V	14375996	14379086	3091	-	WBGene00010143	F56A12.2	protein_coding
V	10067069	10069440	2372	+	WBGene00010179	F57A8.4	protein_coding
V	10075741	10077906	2166	+	WBGene00010182	F57A8.7	protein_coding
V	11438764	11441638	2875	+	WBGene00010191	dmsr-1	protein_coding
V	16339042	16341536	2495	+	WBGene00010214	slc-9B.2	protein_coding
V	16342308	16344401	2094	+	WBGene00010215	nhr-193	protein_coding
V	9741206	9744331	3126	+	WBGene00010251	sta-2	protein_coding
V	14008751	14012052	3302	-	WBGene00010260	ddx-17	protein_coding
V	13661257	13664233	2977	+	WBGene00010279	letm-1	protein_coding
V	13669353	13671958	2606	-	WBGene00010281	mip-2	protein_coding
V	13672589	13676064	3476	+	WBGene00010282	F58G11.4	protein_coding
V	13678875	13681539	2665	+	WBGene00010283	ccz-1	protein_coding
V	11942625	11944657	2033	+	WBGene00010289	F58H1.6	protein_coding
V	17656890	17659385	2496	-	WBGene00010293	fbxa-108	protein_coding
V	17680617	17683863	3247	-	WBGene00010300	F59A1.15	protein_coding
V	10612680	10615596	2917	-	WBGene00010375	H09F14.1	protein_coding
V	14891377	14893455	2079	-	WBGene00010380	mpst-2	protein_coding
V	14895647	14899019	3373	+	WBGene00010383	mpst-3	protein_coding
V	11110100	11113091	2992	-	WBGene00010405	erfa-3	protein_coding
V	11119813	11122493	2681	-	WBGene00010408	mboa-2	protein_coding
V	10602555	10605581	3027	+	WBGene00010418	H27A22.1	protein_coding
V	12398753	12400859	2107	-	WBGene00010465	miga-1	protein_coding
V	20351495	20354980	3486	+	WBGene00010506	K02E2.1	protein_coding
V	20384730	20387042	2313	-	WBGene00010508	K02E2.7	protein_coding
V	14248802	14251510	2709	+	WBGene00010515	K02E11.6	protein_coding
V	16173746	16175857	2112	-	WBGene00010589	cyp-33D1	protein_coding
V	9497042	9499376	2335	+	WBGene00010593	gsnl-1	protein_coding
V	9501401	9504580	3180	+	WBGene00010594	swt-5	protein_coding
V	9504910	9507118	2209	+	WBGene00010595	haao-1	protein_coding
V	15693994	15696217	2224	+	WBGene00010603	nhr-198	protein_coding
V	10343032	10345489	2458	+	WBGene00010626	K07C5.3	protein_coding
V	10350466	10352978	2513	-	WBGene00010627	nol-56	protein_coding
V	10353583	10355823	2241	-	WBGene00010629	sluh-7	protein_coding
V	10358538	10361535	2998	+	WBGene00010630	ttll-15	protein_coding
V	10346649	10350154	3506	-	WBGene00010632	K07C5.9	protein_coding
V	15134198	15136801	2604	-	WBGene00010685	aipl-1	protein_coding
V	15140547	15144079	3533	+	WBGene00010686	K08F9.3	protein_coding
V	15144019	15146435	2417	+	WBGene00010687	K08F9.4	protein_coding
V	10004755	10007482	2728	+	WBGene00010697	uda-1	protein_coding
V	9993630	9995891	2262	-	WBGene00010698	K08H10.6	protein_coding
V	12692486	12695255	2770	-	WBGene00010734	parn-1	protein_coding
V	11191283	11193639	2357	+	WBGene00010741	lgc-49	protein_coding
V	11193730	11196209	2480	-	WBGene00010742	clc-6	protein_coding
V	17298282	17301475	3194	-	WBGene00010754	K10G4.5	protein_coding
V	11880032	11883219	3188	+	WBGene00010789	sulp-5	protein_coding
V	15241559	15244003	2445	+	WBGene00010799	chil-12	protein_coding
V	19445873	19448905	3033	-	WBGene00010851	M04C3.2	protein_coding
V	19792509	19795031	2523	-	WBGene00010933	M162.7	protein_coding
V	10085164	10087363	2200	+	WBGene00011004	R04B5.6	protein_coding
V	10096305	10098597	2293	-	WBGene00011006	ugt-47	protein_coding
V	12314919	12317180	2262	-	WBGene00011016	R04F11.3	protein_coding
V	12056562	12059753	3192	-	WBGene00011087	R07B7.2	protein_coding
V	12065959	12068537	2579	-	WBGene00011088	kmo-2	protein_coding
V	12072862	12074986	2125	-	WBGene00011090	R07B7.6	protein_coding
V	12081085	12084316	3232	-	WBGene00011092	R07B7.8	protein_coding
V	12078033	12080374	2342	-	WBGene00011093	R07B7.9	protein_coding
V	12083216	12086460	3245	+	WBGene00011094	R07B7.10	protein_coding
V	12089073	12091871	2799	+	WBGene00011096	R07B7.12	protein_coding
V	12098149	12100643	2495	+	WBGene00011100	nhr-209	protein_coding
V	13932579	13934645	2067	-	WBGene00011185	R10D12.1	protein_coding
V	13950718	13953291	2574	-	WBGene00011189	R10D12.8	protein_coding
V	13956106	13958347	2242	-	WBGene00011191	R10D12.10	protein_coding
V	13958746	13961016	2271	-	WBGene00011192	srh-24	protein_coding
V	13937150	13939617	2468	+	WBGene00011197	srw-145	protein_coding
V	18234500	18236764	2265	-	WBGene00011209	R10E8.3	protein_coding
V	18254783	18257067	2285	+	WBGene00011211	R10E8.5	protein_coding
V	18238109	18241670	3562	-	WBGene00011213	R10E8.8	protein_coding
V	12704377	12707766	3390	+	WBGene00011242	R11D1.1	protein_coding
V	12708605	12710805	2201	+	WBGene00011243	R11D1.2	protein_coding
V	12720013	12722883	2871	+	WBGene00011246	R11D1.7	protein_coding
V	12729520	12731794	2275	+	WBGene00011248	R11D1.10	protein_coding
V	13511905	13515215	3311	-	WBGene00011249	R11G10.2	protein_coding
V	14598006	14600089	2084	+	WBGene00011250	R11H6.2	protein_coding
V	11833619	11835708	2090	+	WBGene00011262	pho-8	protein_coding
V	12971110	12973281	2172	+	WBGene00011308	pnn-1	protein_coding
V	14987547	14991126	3580	-	WBGene00011318	cdt-2	protein_coding
V	15002543	15005067	2525	+	WBGene00011323	mut-15	protein_coding
V	13712990	13715273	2284	-	WBGene00011329	zipt-9	protein_coding
V	13716824	13720414	3591	+	WBGene00011330	T01D3.6	protein_coding
V	15116844	15119617	2774	-	WBGene00011339	T01G5.1	protein_coding
V	15121724	15125262	3539	-	WBGene00011340	ugt-30	protein_coding
V	14163255	14166730	3476	-	WBGene00011362	cest-1.1	protein_coding
V	14157663	14160862	3200	-	WBGene00011364	cest-1.2	protein_coding
V	11342233	11344725	2493	+	WBGene00011383	T02E9.5	protein_coding
V	16578462	16580524	2063	-	WBGene00011396	nhr-271	protein_coding
V	16600842	16603202	2361	-	WBGene00011397	T03E6.8	protein_coding
V	11296621	11298732	2112	-	WBGene00011402	T03F7.5	protein_coding
V	12241971	12245044	3074	-	WBGene00011449	T04H1.2	protein_coding
V	12256698	12258804	2107	+	WBGene00011452	ugt-55	protein_coding
V	12258982	12261215	2234	+	WBGene00011453	ugt-56	protein_coding
V	15881932	15884798	2867	-	WBGene00011515	oac-42	protein_coding
V	15886719	15888851	2133	-	WBGene00011517	cgt-1	protein_coding
V	15894439	15896771	2333	-	WBGene00011520	nhr-213	protein_coding
V	15402264	15404409	2146	+	WBGene00011539	fbxa-135	protein_coding
V	15421529	15423683	2155	-	WBGene00011542	fbxa-104	protein_coding
V	10028150	10031092	2943	-	WBGene00011543	acl-2	protein_coding
V	9927781	9930775	2995	-	WBGene00011576	rmh-2	protein_coding
V	12867962	12870045	2084	-	WBGene00011589	T07F10.3	protein_coding
V	13181580	13184237	2658	-	WBGene00011649	T09E8.4	protein_coding
V	16024326	16027459	3134	+	WBGene00011688	T10C6.6	protein_coding
V	13477292	13479866	2575	-	WBGene00011693	T10G3.2	protein_coding
V	13487023	13490199	3177	-	WBGene00011694	T10G3.3	protein_coding
V	13482028	13484439	2412	-	WBGene00011695	T10G3.4	protein_coding
V	15270147	15272363	2217	-	WBGene00011697	T10H4.4	protein_coding
V	15285556	15287956	2401	-	WBGene00011698	cyp-34A1	protein_coding
V	15288777	15291095	2319	-	WBGene00011699	cyp-34A2	protein_coding
V	11459555	11462032	2478	+	WBGene00011709	T11F9.1	protein_coding
V	11493551	11496383	2833	-	WBGene00011713	T11F9.12	protein_coding
V	16258442	16260687	2246	+	WBGene00011750	nhr-218	protein_coding
V	16272673	16275447	2775	-	WBGene00011754	T13F3.7	protein_coding
V	14205514	14209010	3497	+	WBGene00011793	T16A9.3	protein_coding
V	12929482	12933000	3519	+	WBGene00011796	T16G1.2	protein_coding
V	12942272	12944329	2058	-	WBGene00011797	T16G1.3	protein_coding
V	12932941	12935112	2172	-	WBGene00011801	T16G1.7	protein_coding
V	11217583	11219911	2329	+	WBGene00011830	cyp-29A2	protein_coding
V	11222748	11226018	3271	-	WBGene00011832	bgal-1	protein_coding
V	11234650	11237427	2778	+	WBGene00011833	T19B10.5	protein_coding
V	11241880	11244726	2847	+	WBGene00011835	pgap-1	protein_coding
V	11248146	11250954	2809	+	WBGene00011836	mam-4	protein_coding
V	11172213	11174683	2471	+	WBGene00011839	T19C4.5	protein_coding
V	17225689	17227998	2310	+	WBGene00011841	scl-25	protein_coding
V	10572914	10575454	2541	+	WBGene00011891	del-6	protein_coding
V	10590548	10592579	2032	-	WBGene00011895	T21C9.9	protein_coding
V	10599104	10602146	3043	+	WBGene00011897	scpl-4	protein_coding
V	13880907	13884127	3221	+	WBGene00011930	T22G5.3	protein_coding
V	13893325	13896415	3091	+	WBGene00011932	sptl-3	protein_coding
V	16742423	16744881	2459	+	WBGene00012021	T25E12.6	protein_coding
V	16739268	16741588	2321	+	WBGene00012022	clec-39	protein_coding
V	15790207	15792509	2303	-	WBGene00012046	T26E4.4	protein_coding
V	15799212	15802723	3512	-	WBGene00012051	T26E4.9	protein_coding
V	12510645	12512949	2305	-	WBGene00012143	T28H10.2	protein_coding
V	12494728	12497755	3028	-	WBGene00012243	W04D2.4	protein_coding
V	19743605	19745753	2149	+	WBGene00012249	W04E12.4	protein_coding
V	19746152	19748540	2389	+	WBGene00012250	W04E12.5	protein_coding
V	19748961	19751226	2266	-	WBGene00012251	clec-49	protein_coding
V	19735077	19737558	2482	-	WBGene00012252	W04E12.7	protein_coding
V	19752399	19755368	2970	-	WBGene00012253	clec-50	protein_coding
V	19756553	19758600	2048	+	WBGene00012254	W04E12.9	protein_coding
V	11689413	11691691	2279	-	WBGene00012280	W05E10.1	protein_coding
V	11687177	11689288	2112	+	WBGene00012281	W05E10.2	protein_coding
V	11693099	11695697	2599	-	WBGene00012282	W05E10.5	protein_coding
V	14821853	14824524	2672	+	WBGene00012291	W06A7.2	protein_coding
V	16789267	16792773	3507	+	WBGene00012315	immt-2	protein_coding
V	16347058	16349915	2858	+	WBGene00012346	W08G11.1	protein_coding
V	16344375	16346506	2132	-	WBGene00012349	W08G11.5	protein_coding
V	13445899	13448815	2917	+	WBGene00012381	Y2H9A.4	protein_coding
V	15716348	15718662	2315	-	WBGene00012399	Y6E2A.5	protein_coding
V	10256170	10258783	2614	+	WBGene00012494	nhr-232	protein_coding
V	17692502	17695902	3401	-	WBGene00012515	Y26G10.1	protein_coding
V	10478564	10480964	2401	+	WBGene00012532	crp-1	protein_coding
V	15423633	15427044	3412	-	WBGene00012533	fbxa-209	protein_coding
V	20325717	20328083	2367	+	WBGene00012612	Y38H6A.1	protein_coding
V	20345189	20348151	2963	+	WBGene00012614	Y38H6A.3	protein_coding
V	20536430	20539347	2918	-	WBGene00012628	Y38H6C.16	protein_coding
V	19201016	19203607	2592	-	WBGene00012664	Y39B6A.1	protein_coding
V	19145653	19149157	3505	-	WBGene00012669	Y39B6A.7	protein_coding
V	19136506	19139094	2589	+	WBGene00012671	Y39B6A.9	protein_coding
V	19131531	19133607	2077	-	WBGene00012672	Y39B6A.10	protein_coding
V	19127525	19131014	3490	+	WBGene00012673	dyf-17	protein_coding
V	19099035	19101786	2752	-	WBGene00012678	zhp-4	protein_coding
V	19039030	19042605	3576	-	WBGene00012682	asp-16	protein_coding
V	19031756	19035255	3500	+	WBGene00012686	Y39B6A.27	protein_coding
V	18990851	18993505	2655	+	WBGene00012695	Y39B6A.37	protein_coding
V	18979319	18981479	2161	-	WBGene00012698	sws-1	protein_coding
V	18957578	18960172	2595	-	WBGene00012702	ztf-20	protein_coding
V	14583302	14585451	2150	-	WBGene00012741	Y40H4A.2	protein_coding
V	11091016	11093607	2592	-	WBGene00012777	lact-8	protein_coding
V	11107535	11109747	2213	-	WBGene00012780	Y42A5A.5	protein_coding
V	19377444	19381029	3586	+	WBGene00012810	nceh-1	protein_coding
V	19478152	19480465	2314	+	WBGene00012819	Y43F8B.9	protein_coding
V	19474464	19476990	2527	+	WBGene00012820	Y43F8B.10	protein_coding
V	19641292	19644030	2739	-	WBGene00012829	Y43F8C.7	protein_coding
V	19693900	19697398	3499	-	WBGene00012834	Y43F8C.13	protein_coding
V	19609494	19612150	2657	+	WBGene00012840	grsp-1	protein_coding
V	20642196	20644380	2185	+	WBGene00012847	srxa-15	protein_coding
V	20713920	20716872	2953	+	WBGene00012850	Y44A6C.1	protein_coding
V	20787340	20790033	2694	-	WBGene00012852	Y44A6D.1	protein_coding
V	14351709	14354422	2714	+	WBGene00013025	vha-13	protein_coding
V	14356846	14358890	2045	-	WBGene00013027	Y49A3A.4	protein_coding
V	14734652	14736951	2300	-	WBGene00013048	Y50E8A.5	protein_coding
V	14738503	14741333	2831	-	WBGene00013049	Y50E8A.6	protein_coding
V	14745684	14748708	3025	-	WBGene00013050	lipl-8	protein_coding
V	18282897	18286527	3631	+	WBGene00013058	clec-247	protein_coding
V	18374494	18376755	2262	+	WBGene00013066	Y51A2B.2	protein_coding
V	18380620	18382690	2071	-	WBGene00013067	nhr-288	protein_coding
V	18386245	18389146	2902	-	WBGene00013068	Y51A2B.4	protein_coding
V	18389277	18391349	2073	+	WBGene00013069	Y51A2B.5	protein_coding
V	18391845	18394303	2459	-	WBGene00013070	Y51A2B.6	protein_coding
V	18082402	18085200	2799	-	WBGene00013348	fbxa-106	protein_coding
V	19982994	19986313	3320	-	WBGene00013357	clec-260	protein_coding
V	19955488	19958912	3425	+	WBGene00013358	abhd-3.1	protein_coding
V	19946740	19949093	2354	-	WBGene00013360	tmed-4	protein_coding
V	19916555	19920001	3447	+	WBGene00013365	Y60A3A.19	protein_coding
V	20011954	20015256	3303	+	WBGene00013366	Y60A3A.21	protein_coding
V	17199226	17201757	2532	+	WBGene00013468	srz-96	protein_coding
V	17202147	17205340	3194	+	WBGene00013469	Y68A4A.10	protein_coding
V	18620179	18622562	2384	-	WBGene00013479	Y69H2.1	protein_coding
V	18903772	18906252	2481	+	WBGene00013588	nlp-42	protein_coding
V	16922252	16924394	2143	+	WBGene00013613	Y102A5C.4	protein_coding
V	16947142	16949709	2568	-	WBGene00013620	fbxa-111	protein_coding
V	20148195	20150609	2415	+	WBGene00013750	Y113G7A.13	protein_coding
V	20135841	20138457	2617	-	WBGene00013751	Y113G7A.14	protein_coding
V	20267377	20269711	2335	-	WBGene00013766	prmt-1	protein_coding
V	20234805	20237745	2941	-	WBGene00013768	sld-5	protein_coding
V	19797936	19801133	3198	-	WBGene00013820	Y116F11B.2	protein_coding
V	19842632	19845977	3346	-	WBGene00013822	Y116F11B.6	protein_coding
V	19857634	19860980	3347	+	WBGene00013824	Y116F11B.8	protein_coding
V	19883216	19885854	2639	+	WBGene00013828	Y116F11B.13	protein_coding
V	20306103	20308919	2817	+	WBGene00013830	ZC15.1	protein_coding
V	10737116	10739350	2235	+	WBGene00013862	wdr-5.3	protein_coding
V	10739274	10741457	2184	-	WBGene00013863	ZC302.3	protein_coding
V	14168360	14171481	3122	-	WBGene00013875	cest-2.1	protein_coding
V	14868516	14871547	3032	-	WBGene00013884	ZC412.3	protein_coding
V	12816912	12819886	2975	-	WBGene00013899	ZC443.4	protein_coding
V	12820260	12822778	2519	+	WBGene00013900	ugt-18	protein_coding
V	12825024	12827442	2419	+	WBGene00013901	ugt-16	protein_coding
V	12795481	12798224	2744	-	WBGene00013904	ugt-6	protein_coding
V	12793014	12795336	2323	-	WBGene00013905	ugt-4	protein_coding
V	12790676	12792965	2290	-	WBGene00013906	ugt-5	protein_coding
V	18444418	18447019	2602	+	WBGene00013944	ZK228.1	protein_coding
V	18458241	18461250	3010	-	WBGene00013946	ZK228.3	protein_coding
V	18462787	18465426	2640	+	WBGene00013947	ZK228.4	protein_coding
V	18410327	18412987	2661	-	WBGene00013949	ZK262.2	protein_coding
V	18414351	18417735	3385	+	WBGene00013950	txt-8	protein_coding
V	9666694	9670050	3357	+	WBGene00013962	ZK287.1	protein_coding
V	9670028	9673667	3640	-	WBGene00013963	sulp-8	protein_coding
V	10212927	10216305	3379	+	WBGene00014113	hpo-40	protein_coding
V	10206716	10210344	3629	-	WBGene00014114	tftc-3	protein_coding
V	12168034	12170214	2181	-	WBGene00014122	ZK863.1	protein_coding
V	12181348	12184194	2847	-	WBGene00014124	usip-1	protein_coding
V	15316477	15318524	2048	+	WBGene00014192	nhr-246	protein_coding
V	15322982	15325379	2398	+	WBGene00014193	nhr-247	protein_coding
V	3958160	3961335	3176	-	WBGene00015041	cyp-34A6	protein_coding
V	3961681	3963815	2135	-	WBGene00015042	cyp-34A7	protein_coding
V	3964797	3967823	3027	-	WBGene00015043	cyp-34A8	protein_coding
V	3968134	3970540	2407	-	WBGene00015044	cyp-34A9	protein_coding
V	3970702	3972991	2290	-	WBGene00015045	cyp-34A10	protein_coding
V	9135656	9137718	2063	-	WBGene00015054	pitr-2	protein_coding
V	9138946	9141397	2452	-	WBGene00015055	pitr-3	protein_coding
V	9152321	9154872	2552	-	WBGene00015056	B0222.5	protein_coding
V	5240759	5243136	2378	-	WBGene00015067	cest-35.1	protein_coding
V	5260332	5263099	2768	-	WBGene00015071	cest-30	protein_coding
V	5275554	5278101	2548	-	WBGene00015073	B0238.9	protein_coding
V	5265844	5268828	2985	+	WBGene00015076	B0238.12	protein_coding
V	8776570	8779318	2749	+	WBGene00015218	B0507.1	protein_coding
V	8774332	8776630	2299	+	WBGene00015219	B0507.2	protein_coding
V	8760622	8762961	2340	-	WBGene00015225	B0507.8	protein_coding
V	434198	436726	2529	+	WBGene00015255	B0554.2	protein_coding
V	424440	426574	2135	+	WBGene00015258	B0554.5	protein_coding
V	2490512	2492701	2190	+	WBGene00015272	C01B4.8	protein_coding
V	3478031	3480446	2416	-	WBGene00015316	srbc-30	protein_coding
V	5872059	5875532	3474	+	WBGene00015360	C02G6.2	protein_coding
V	5175020	5177309	2290	-	WBGene00015369	ugt-51	protein_coding
V	7345794	7348555	2762	+	WBGene00015395	nhr-147	protein_coding
V	5907390	5909785	2396	+	WBGene00015421	C04E6.4	protein_coding
V	5902133	5904843	2711	+	WBGene00015422	C04E6.5	protein_coding
V	3358567	3361093	2527	+	WBGene00015435	C04E12.5	protein_coding
V	3374362	3377073	2712	-	WBGene00015438	srbc-2	protein_coding
V	5093597	5097135	3539	-	WBGene00015444	C04F5.2	protein_coding
V	5105764	5107916	2153	-	WBGene00015448	srab-3	protein_coding
V	5108180	5110772	2593	-	WBGene00015449	ugt-63	protein_coding
V	5111518	5113754	2237	-	WBGene00015450	C04F5.8	protein_coding
V	7232673	7234826	2154	-	WBGene00015462	C05C8.5	protein_coding
V	7234922	7237130	2209	-	WBGene00015463	hpo-9	protein_coding
V	7252244	7255195	2952	-	WBGene00015465	C05C8.8	protein_coding
V	7237381	7239659	2279	+	WBGene00015466	hyls-1	protein_coding
V	3503080	3506352	3273	-	WBGene00015577	ugt-64	protein_coding
V	8581261	8583576	2316	+	WBGene00015670	C10B5.1	protein_coding
V	5996416	5999344	2929	+	WBGene00015677	cpg-4	protein_coding
V	5324806	5328414	3609	-	WBGene00015684	C10G8.8	protein_coding
V	7679314	7681459	2146	-	WBGene00015709	cyp-33A1	protein_coding
V	7681820	7683957	2138	-	WBGene00015712	sre-11	protein_coding
V	7288999	7292223	3225	+	WBGene00015718	C13A2.1	protein_coding
V	7282337	7284772	2436	+	WBGene00015720	C13A2.3	protein_coding
V	7275791	7278455	2665	+	WBGene00015722	C13A2.5	protein_coding
V	7269699	7272787	3089	+	WBGene00015723	C13A2.6	protein_coding
V	7266321	7268903	2583	+	WBGene00015724	C13A2.7	protein_coding
V	2435725	2437784	2060	+	WBGene00015730	srt-1	protein_coding
V	4997021	5000566	3546	-	WBGene00015739	ugt-7	protein_coding
V	545832	548080	2249	-	WBGene00015760	C14C6.6	protein_coding
V	572031	574739	2709	-	WBGene00015764	C14C6.13	protein_coding
V	5661159	5663495	2337	+	WBGene00015766	C14C11.2	protein_coding
V	5647610	5651040	3431	+	WBGene00015768	C14C11.4	protein_coding
V	8248111	8250308	2198	-	WBGene00015861	C16D9.6	protein_coding
V	8261308	8263566	2259	-	WBGene00015863	C16D9.8	protein_coding
V	3320748	3324278	3531	-	WBGene00015882	C17B7.8	protein_coding
V	3906106	3908452	2347	+	WBGene00015897	nhr-156	protein_coding
V	3894961	3898208	3248	+	WBGene00015898	sre-9	protein_coding
V	3866556	3869005	2450	-	WBGene00015900	nhr-157	protein_coding
V	3871174	3874152	2979	-	WBGene00015901	nhr-158	protein_coding
V	3875245	3878323	3079	-	WBGene00015902	nhr-159	protein_coding
V	5545669	5548062	2394	-	WBGene00015965	ugt-48	protein_coding
V	5568184	5570533	2350	-	WBGene00015969	glb-6	protein_coding
V	4777960	4780032	2073	+	WBGene00015980	C18G1.1	protein_coding
V	4770670	4773086	2417	+	WBGene00015981	elt-7	protein_coding
V	4760974	4764060	3087	+	WBGene00015982	bgnt-1.4	protein_coding
V	4750594	4753816	3223	+	WBGene00015984	C18G1.6	protein_coding
V	4745569	4748089	2521	+	WBGene00015985	C18G1.7	protein_coding
V	4764220	4766601	2382	-	WBGene00015986	C18G1.8	protein_coding
V	9175789	9177997	2209	+	WBGene00016045	spas-1	protein_coding
V	9041330	9043677	2348	+	WBGene00016092	cyp-33B1	protein_coding
V	9033567	9035605	2039	+	WBGene00016094	C25E10.4	protein_coding
V	9030548	9032596	2049	+	WBGene00016095	C25E10.5	protein_coding
V	7785417	7787712	2296	+	WBGene00016146	C26F1.1	protein_coding
V	7781811	7784594	2784	+	WBGene00016147	cyp-32A1	protein_coding
V	2580898	2582944	2047	+	WBGene00016231	C29G2.3	protein_coding
V	2582867	2585908	3042	-	WBGene00016234	C29G2.6	protein_coding
V	2900269	2903327	3059	-	WBGene00016282	C31B8.7	protein_coding
V	2925182	2927653	2472	-	WBGene00016285	C31B8.12	protein_coding
V	7009761	7012311	2551	+	WBGene00016360	C33G8.2	protein_coding
V	6980587	6982913	2327	-	WBGene00016364	nhr-161	protein_coding
V	6983371	6986043	2673	-	WBGene00016368	nhr-163	protein_coding
V	5405353	5408386	3034	+	WBGene00016428	dmsr-7	protein_coding
V	5386299	5389449	3151	+	WBGene00016429	C35A11.2	protein_coding
V	5372418	5375354	2937	+	WBGene00016430	C35A11.3	protein_coding
V	7844343	7847171	2829	-	WBGene00016500	memo-1	protein_coding
V	7852280	7854700	2421	-	WBGene00016501	C37C3.9	protein_coding
V	4847653	4849838	2186	+	WBGene00016506	abhd-5.1	protein_coding
V	4844685	4847025	2341	+	WBGene00016507	abhd-5.2	protein_coding
V	1495634	1497990	2357	+	WBGene00016512	C38C3.3	protein_coding
V	1482042	1484124	2083	+	WBGene00016513	C38C3.4	protein_coding
V	1260342	1262618	2277	+	WBGene00016538	C39F7.1	protein_coding
V	2179514	2181938	2425	+	WBGene00016686	cyp-33C1	protein_coding
V	2153574	2155799	2226	+	WBGene00016691	srbc-23	protein_coding
V	2183488	2186599	3112	+	WBGene00016697	cyp-33C2	protein_coding
V	7605158	7607211	2054	+	WBGene00016815	clec-213	protein_coding
V	7594753	7598369	3617	-	WBGene00016818	C50E3.7	protein_coding
V	3089068	3091352	2285	+	WBGene00016849	acs-21	protein_coding
V	3059640	3062178	2539	-	WBGene00016856	srt-15	protein_coding
V	3091812	3094561	2750	-	WBGene00016860	cyp-33C9	protein_coding
V	5230475	5233891	3417	-	WBGene00016862	cest-32	protein_coding
V	5234752	5237216	2465	-	WBGene00016863	cest-35.2	protein_coding
V	5237245	5239504	2260	-	WBGene00016864	C52A10.3	protein_coding
V	7515239	7517353	2115	+	WBGene00016925	srb-18	protein_coding
V	7517652	7520177	2526	-	WBGene00016928	srb-19	protein_coding
V	5606555	5609368	2814	+	WBGene00016988	CD4.1	protein_coding
V	5599145	5601363	2219	-	WBGene00016993	CD4.8	protein_coding
V	8130611	8133329	2719	+	WBGene00017016	snap-1	protein_coding
V	8123684	8126814	3131	+	WBGene00017018	D1014.5	protein_coding
V	8121168	8123470	2303	+	WBGene00017019	D1014.6	protein_coding
V	8118264	8120417	2154	+	WBGene00017020	D1014.7	protein_coding
V	4329039	4332550	3512	-	WBGene00017061	oac-12	protein_coding
V	4338883	4341308	2426	-	WBGene00017062	glrx-3	protein_coding
V	210145	212787	2643	-	WBGene00017082	DC2.5	protein_coding
V	9371573	9373613	2041	-	WBGene00017093	E02C12.8	protein_coding
V	9379882	9382313	2432	-	WBGene00017097	E02C12.12	protein_coding
V	9258136	9261592	3457	-	WBGene00017198	nhr-36	protein_coding
V	7307389	7309589	2201	+	WBGene00017228	F07G11.1	protein_coding
V	7298763	7301553	2791	+	WBGene00017230	F07G11.3	protein_coding
V	7292660	7295370	2711	-	WBGene00017231	F07G11.4	protein_coding
V	5446139	5448758	2620	+	WBGene00017260	F08F3.1	protein_coding
V	5410955	5413001	2047	+	WBGene00017262	F08F3.4	protein_coding
V	5418038	5420067	2030	-	WBGene00017263	F08F3.6	protein_coding
V	5437084	5439168	2085	-	WBGene00017265	snpc-1.3	protein_coding
V	7175501	7178795	3295	+	WBGene00017314	lgc-39	protein_coding
V	7167009	7169281	2273	+	WBGene00017315	ugt-36	protein_coding
V	7193766	7196137	2372	-	WBGene00017317	attf-2	protein_coding
V	7157142	7159235	2094	+	WBGene00017329	ugt-39	protein_coding
V	7139475	7141964	2490	-	WBGene00017331	ugt-40	protein_coding
V	7141923	7145318	3396	-	WBGene00017332	ugt-37	protein_coding
V	7148688	7150714	2027	-	WBGene00017334	F10D2.8	protein_coding
V	7161068	7163595	2528	-	WBGene00017336	ugt-41	protein_coding
V	4382512	4384582	2071	-	WBGene00017411	F13A2.2	protein_coding
V	4393540	4396357	2818	-	WBGene00017412	F13A2.3	protein_coding
V	6363408	6365671	2264	-	WBGene00017431	cest-33	protein_coding
V	6372101	6374944	2844	-	WBGene00017433	F13H6.5	protein_coding
V	5138219	5141555	3337	+	WBGene00017466	F14F9.3	protein_coding
V	5127093	5130076	2984	+	WBGene00017468	F14F9.5	protein_coding
V	1610263	1612758	2496	+	WBGene00017503	nhr-177	protein_coding
V	1601038	1603954	2917	+	WBGene00017504	F16B4.2	protein_coding
V	1588428	1591787	3360	+	WBGene00017507	F16B4.5	protein_coding
V	1615723	1618860	3138	-	WBGene00017512	nhr-179	protein_coding
V	6110971	6112997	2027	-	WBGene00017537	F17A9.5	protein_coding
V	7433383	7435705	2323	-	WBGene00017565	ddo-2	protein_coding
V	7577512	7580546	3035	-	WBGene00017606	ets-6	protein_coding
V	7046305	7049254	2950	+	WBGene00017614	F20A1.2	protein_coding
V	7018838	7021872	3035	-	WBGene00017616	F20A1.4	protein_coding
V	7024595	7027155	2561	-	WBGene00017618	F20A1.6	protein_coding
V	8161957	8165448	3492	+	WBGene00017635	F20D6.5	protein_coding
V	8164749	8168269	3521	-	WBGene00017637	F20D6.8	protein_coding
V	8196774	8199094	2321	-	WBGene00017640	F20D6.11	protein_coding
V	9128073	9130675	2603	+	WBGene00017653	F21C10.3	protein_coding
V	8269210	8272056	2847	+	WBGene00017678	asp-12	protein_coding
V	8282376	8284900	2525	-	WBGene00017681	slc-17.5	protein_coding
V	2127535	2130100	2566	+	WBGene00017719	ldp-1	protein_coding
V	2103658	2106076	2419	-	WBGene00017722	F22F7.4	protein_coding
V	2115486	2118674	3189	-	WBGene00017723	bgnt-1.2	protein_coding
V	7455308	7457598	2291	+	WBGene00017783	F25E5.2	protein_coding
V	7444661	7446833	2173	+	WBGene00017787	nhr-141	protein_coding
V	5866134	5869327	3194	-	WBGene00017835	F26F12.4	protein_coding
V	7072609	7075838	3230	+	WBGene00017850	F27B10.1	protein_coding
V	3463814	3466192	2379	+	WBGene00017867	slc-28.1	protein_coding
V	3460219	3463215	2997	+	WBGene00017868	slc-28.2	protein_coding
V	8638221	8640650	2430	+	WBGene00017879	acd-4	protein_coding
V	684060	687260	3201	+	WBGene00017957	F31F4.1	protein_coding
V	647188	649763	2576	+	WBGene00017959	ugt-42	protein_coding
V	4369353	4371383	2031	-	WBGene00017984	gmpr-1	protein_coding
V	4371807	4373872	2066	+	WBGene00017988	fipp-1	protein_coding
V	297947	300005	2059	+	WBGene00018010	F33E11.2	protein_coding
V	3298885	3301998	3114	-	WBGene00018058	srbc-1	protein_coding
V	3313244	3315516	2273	-	WBGene00018061	arrd-19	protein_coding
V	9416924	9419298	2375	+	WBGene00018087	F36D4.1	protein_coding
V	2100061	2103218	3158	-	WBGene00018092	F36F12.1	protein_coding
V	2091731	2095304	3574	-	WBGene00018093	F36F12.2	protein_coding
V	1794518	1797451	2934	+	WBGene00018110	F36H9.1	protein_coding
V	1779655	1782022	2368	-	WBGene00018113	F36H9.5	protein_coding
V	1799506	1803143	3638	-	WBGene00018114	srt-41	protein_coding
V	2872465	2875600	3136	-	WBGene00018138	folt-2	protein_coding
V	8360092	8362431	2340	+	WBGene00018179	F38E1.6	protein_coding
V	4742422	4745373	2952	+	WBGene00018206	ugt-61	protein_coding
V	4737831	4741173	3343	+	WBGene00018207	F39G3.2	protein_coding
V	4731911	4734723	2813	+	WBGene00018208	F39G3.3	protein_coding
V	7878914	7881398	2485	+	WBGene00018217	F40A3.2	protein_coding
V	2250540	2252591	2052	+	WBGene00018260	cyp-33C7	protein_coding
V	2242778	2244865	2088	+	WBGene00018262	cyp-33C3	protein_coding
V	2247254	2249410	2157	-	WBGene00018264	cyp-33C6	protein_coding
V	2257420	2259927	2508	-	WBGene00018265	nhr-182	protein_coding
V	2262489	2264634	2146	-	WBGene00018266	nhr-183	protein_coding
V	8626900	8629129	2230	-	WBGene00018293	F41E6.12	protein_coding
V	8629174	8631327	2154	-	WBGene00018294	atg-18	protein_coding
V	826397	828856	2460	+	WBGene00018313	F41H8.2	protein_coding
V	8026708	8028789	2082	+	WBGene00018400	F43H9.4	protein_coding
V	9318311	9321347	3037	+	WBGene00018402	kvs-3	protein_coding
V	6622194	6624799	2606	+	WBGene00018412	nhr-37	protein_coding
V	2215652	2218161	2510	+	WBGene00018414	nstp-8	protein_coding
V	5778817	5780922	2106	-	WBGene00018427	F44E7.5	protein_coding
V	5782879	5785472	2594	-	WBGene00018429	F44E7.7	protein_coding
V	8537331	8539614	2284	+	WBGene00018477	otpl-4	protein_coding
V	8529519	8532465	2947	+	WBGene00018478	otpl-5	protein_coding
V	8526074	8528580	2507	+	WBGene00018479	otpl-6	protein_coding
V	8521503	8524678	3176	+	WBGene00018480	otpl-7	protein_coding
V	3844429	3847368	2940	-	WBGene00018539	nhr-185	protein_coding
V	3852298	3854947	2650	-	WBGene00018541	nhr-186	protein_coding
V	3841794	3844007	2214	-	WBGene00018543	ugt-32	protein_coding
V	4285037	4287203	2167	+	WBGene00018552	srt-19	protein_coding
V	4257957	4260190	2234	-	WBGene00018554	srt-3	protein_coding
V	4261485	4264616	3132	-	WBGene00018555	srt-35	protein_coding
V	4275975	4278835	2861	-	WBGene00018558	srt-20	protein_coding
V	619453	621674	2222	+	WBGene00018615	F48G7.4	protein_coding
V	640749	642924	2176	-	WBGene00018622	nhr-190	protein_coding
V	643695	646229	2535	-	WBGene00018623	F48G7.12	protein_coding
V	8392256	8394457	2202	-	WBGene00018696	pho-6	protein_coding
V	1548143	1550714	2572	+	WBGene00018706	F52F10.2	protein_coding
V	1538354	1541886	3533	-	WBGene00018707	oac-31	protein_coding
V	1542442	1545783	3342	-	WBGene00018708	oac-32	protein_coding
V	1551008	1553104	2097	-	WBGene00018709	srsx-8	protein_coding
V	1467744	1471105	3362	+	WBGene00018757	gid-8	protein_coding
V	2615310	2618557	3248	+	WBGene00018758	F53E10.1	protein_coding
V	2592591	2595062	2472	+	WBGene00018760	irg-3	protein_coding
V	2596020	2598930	2911	-	WBGene00018761	F53E10.5	protein_coding
V	2453414	2456147	2734	+	WBGene00018911	F56A4.3	protein_coding
V	2449518	2452460	2943	-	WBGene00018915	str-267	protein_coding
V	2456176	2458286	2111	-	WBGene00018917	irld-35	protein_coding
V	2461320	2464579	3260	-	WBGene00018918	F56A4.10	protein_coding
V	6390463	6392566	2104	+	WBGene00019015	F57F4.1	protein_coding
V	5927647	5930417	2771	+	WBGene00019032	srsx-17	protein_coding
V	2024703	2027887	3185	-	WBGene00019091	srab-13	protein_coding
V	3624445	3627044	2600	-	WBGene00019098	F59B1.4	protein_coding
V	3629473	3631691	2219	-	WBGene00019099	F59B1.6	protein_coding
V	3641858	3644243	2386	-	WBGene00019100	F59B1.8	protein_coding
V	3644740	3647962	3223	-	WBGene00019101	F59B1.10	protein_coding
V	3024549	3027931	3383	+	WBGene00019105	asp-8	protein_coding
V	3029655	3032443	2789	-	WBGene00019106	irld-38	protein_coding
V	4908884	4911399	2516	+	WBGene00019232	ugt-13	protein_coding
V	4906253	4908304	2052	+	WBGene00019233	ugt-14	protein_coding
V	687684	690032	2349	+	WBGene00019244	H25P19.1	protein_coding
V	1528824	1531259	2436	-	WBGene00019348	K02H11.4	protein_coding
V	4689330	4691611	2282	+	WBGene00019353	K03B4.1	protein_coding
V	4681970	4685112	3143	+	WBGene00019355	K03B4.4	protein_coding
V	6566336	6569311	2976	+	WBGene00019373	K04A8.1	protein_coding
V	1668516	1670761	2246	+	WBGene00019386	irld-42	protein_coding
V	1655145	1657403	2259	+	WBGene00019391	irld-11	protein_coding
V	1651345	1654444	3100	+	WBGene00019392	irld-44	protein_coding
V	1648300	1651143	2844	+	WBGene00019393	irld-45	protein_coding
V	8907196	8909444	2249	+	WBGene00019444	frpr-11	protein_coding
V	8902997	8905510	2514	+	WBGene00019445	frpr-12	protein_coding
V	8899056	8902407	3352	+	WBGene00019448	frpr-13	protein_coding
V	579277	581372	2096	+	WBGene00019452	K06H6.4	protein_coding
V	576370	578428	2059	+	WBGene00019453	K06H6.5	protein_coding
V	9328970	9331527	2558	+	WBGene00019464	K07B1.4	protein_coding
V	3942160	3944523	2364	+	WBGene00019471	cyp-35B2	protein_coding
V	3939032	3941237	2206	+	WBGene00019472	cyp-35B1	protein_coding
V	3936326	3938597	2272	+	WBGene00019473	cyp-35A5	protein_coding
V	8203332	8205986	2655	+	WBGene00019477	cest-17	protein_coding
V	8215534	8217884	2351	-	WBGene00019480	K07C11.8	protein_coding
V	8218267	8221316	3050	-	WBGene00019481	cogc-6	protein_coding
V	6235176	6237734	2559	+	WBGene00019522	K08B12.3	protein_coding
V	3227673	3230170	2498	+	WBGene00019524	K08D9.2	protein_coding
V	3231383	3234987	3605	-	WBGene00019527	K08D9.6	protein_coding
V	835757	839084	3328	-	WBGene00019561	K09C6.7	protein_coding
V	840210	843218	3009	-	WBGene00019562	K09C6.8	protein_coding
V	1050126	1053014	2889	-	WBGene00019625	K10C9.4	protein_coding
V	5036570	5039600	3031	-	WBGene00019650	K11D12.11	protein_coding
V	6676799	6679108	2310	+	WBGene00019652	cest-34	protein_coding
V	6674267	6676417	2151	+	WBGene00019653	cest-31	protein_coding
V	6669820	6672036	2217	+	WBGene00019654	cest-28	protein_coding
V	6685807	6688492	2686	-	WBGene00019655	K11G9.5	protein_coding
V	6281359	6284895	3537	+	WBGene00019667	spe-49	protein_coding
V	464828	467509	2682	+	WBGene00019741	nhr-201	protein_coding
V	462588	464963	2376	+	WBGene00019742	nhr-202	protein_coding
V	459795	461899	2105	+	WBGene00019743	nhr-203	protein_coding
V	5621690	5624749	3060	+	WBGene00019753	M03E7.1	protein_coding
V	5951433	5953891	2459	+	WBGene00019761	M03F8.1	protein_coding
V	5940022	5943366	3345	+	WBGene00019762	syf-3	protein_coding
V	5930905	5933435	2531	+	WBGene00019763	galt-1	protein_coding
V	5933375	5936791	3417	-	WBGene00019764	M03F8.5	protein_coding
V	6045640	6047918	2279	-	WBGene00019806	pgap-3	protein_coding
V	6047897	6051259	3363	-	WBGene00019807	jamp-1	protein_coding
V	4794599	4797112	2514	+	WBGene00019840	R02F11.2	protein_coding
V	4802633	4805947	3315	-	WBGene00019841	R02F11.3	protein_coding
V	9016779	9019359	2581	+	WBGene00019849	oac-40	protein_coding
V	9019314	9022178	2865	-	WBGene00019851	oac-41	protein_coding
V	3772021	3774609	2589	+	WBGene00019963	R08E5.3	protein_coding
V	3797928	3800478	2551	-	WBGene00019966	srt-30	protein_coding
V	3800782	3803542	2761	-	WBGene00019967	cyp-33C8	protein_coding
V	1023780	1027074	3295	-	WBGene00019973	R09A1.3	protein_coding
V	1462011	1464699	2689	-	WBGene00019977	fpn-1.2	protein_coding
V	1439205	1441867	2663	+	WBGene00019979	R09B5.11	protein_coding
V	774995	777272	2278	+	WBGene00019982	srbc-58	protein_coding
V	521595	524218	2624	-	WBGene00020016	lipl-3	protein_coding
V	1422787	1425794	3008	-	WBGene00020017	R12A1.3	protein_coding
V	782732	784763	2032	+	WBGene00020060	srab-16	protein_coding
V	802546	804741	2196	-	WBGene00020062	nhr-270	protein_coding
V	486984	489142	2159	+	WBGene00020152	nhr-211	protein_coding
V	484857	486897	2041	+	WBGene00020153	nhr-212	protein_coding
V	2849343	2852028	2686	+	WBGene00020182	ugt-53	protein_coding
V	2823806	2826835	3030	-	WBGene00020183	T03D3.5	protein_coding
V	4123171	4126034	2864	-	WBGene00020243	T05B4.12	protein_coding
V	7751755	7754657	2903	-	WBGene00020247	T05B11.4	protein_coding
V	5490445	5493646	3202	+	WBGene00020256	T05C3.6	protein_coding
V	6450870	6453119	2250	+	WBGene00020264	acl-8	protein_coding
V	6434128	6436402	2275	+	WBGene00020269	erfa-1	protein_coding
V	6414993	6417501	2509	+	WBGene00020270	T05H4.7	protein_coding
V	1923116	1925587	2472	-	WBGene00020277	T06A1.1	protein_coding
V	1979268	1982741	3474	+	WBGene00020341	T08B1.4	protein_coding
V	1975349	1977380	2032	+	WBGene00020342	fbxa-201	protein_coding
V	4483459	4486543	3085	+	WBGene00020369	exc-15	protein_coding
V	4471365	4473654	2290	+	WBGene00020370	T08H10.3	protein_coding
V	5346494	5349571	3078	-	WBGene00020384	T09D3.3	protein_coding
V	3950023	3952097	2075	+	WBGene00020386	dach-1	protein_coding
V	1872246	1875505	3260	+	WBGene00020391	cct-7	protein_coding
V	1842044	1844807	2764	+	WBGene00020394	T10B5.8	protein_coding
V	6649617	6652355	2739	+	WBGene00020424	T10H9.1	protein_coding
V	6832243	6835342	3100	-	WBGene00020526	T15B7.14	protein_coding
V	6870304	6873812	3509	+	WBGene00020586	frpr-18	protein_coding
V	4874233	4877687	3455	-	WBGene00020590	T19H12.6	protein_coding
V	4887165	4889629	2465	-	WBGene00020592	ugt-12	protein_coding
V	4892588	4895071	2484	-	WBGene00020593	ugt-11	protein_coding
V	4898027	4900120	2094	-	WBGene00020594	ugt-10	protein_coding
V	3410520	3412858	2339	+	WBGene00020612	arrd-22	protein_coding
V	1176724	1178864	2141	+	WBGene00020662	T21H3.1	protein_coding
V	3586639	3589012	2374	+	WBGene00020695	T22F3.2	protein_coding
V	3597670	3600670	3001	-	WBGene00020697	T22F3.7	protein_coding
V	3602048	3605425	3378	-	WBGene00020698	T22F3.8	protein_coding
V	3612158	3614553	2396	-	WBGene00020700	T22F3.11	protein_coding
V	8462359	8465569	3211	+	WBGene00020719	natc-1	protein_coding
V	8457616	8460419	2804	-	WBGene00020721	T23B12.6	protein_coding
V	3532914	3535360	2447	-	WBGene00020748	nhr-221	protein_coding
V	3538897	3541217	2321	-	WBGene00020749	srbc-67	protein_coding
V	6745081	6748613	3533	+	WBGene00020806	T25F10.3	protein_coding
V	6760410	6762461	2052	-	WBGene00020807	T25F10.4	protein_coding
V	6765768	6768732	2965	-	WBGene00020808	clik-1	protein_coding
V	2288153	2290474	2322	-	WBGene00020849	nhr-225	protein_coding
V	2294877	2296977	2101	+	WBGene00020850	nhr-226	protein_coding
V	2285432	2287480	2049	+	WBGene00020851	nhr-227	protein_coding
V	2281759	2284963	3205	+	WBGene00020852	nhr-228	protein_coding
V	2278816	2281401	2586	+	WBGene00020853	fbxa-137	protein_coding
V	3712779	3715969	3191	-	WBGene00020854	T27C4.1	protein_coding
V	3263482	3266289	2808	-	WBGene00020879	T28A11.17	protein_coding
V	6331907	6334037	2131	+	WBGene00020888	T28C12.1	protein_coding
V	6334014	6336119	2106	-	WBGene00020893	T28C12.6	protein_coding
V	7085956	7088854	2899	+	WBGene00020908	VC5.2	protein_coding
V	6499224	6502428	3205	+	WBGene00020909	W01A11.1	protein_coding
V	8307942	8310766	2825	+	WBGene00020938	clec-218	protein_coding
V	8293754	8295966	2213	-	WBGene00020939	W02D7.3	protein_coding
V	6695177	6697652	2476	-	WBGene00020947	W02F12.2	protein_coding
V	6704549	6706934	2386	-	WBGene00020949	W02F12.4	protein_coding
V	6707056	6709101	2046	-	WBGene00020950	dlst-1	protein_coding
V	2666900	2670226	3327	+	WBGene00020954	W02G9.4	protein_coding
V	2622056	2625460	3405	-	WBGene00020961	sknr-1	protein_coding
V	124010	126718	2709	-	WBGene00020999	W03F9.1	protein_coding
V	128237	131671	3435	+	WBGene00021004	sftb-2	protein_coding
V	3682853	3686474	3622	+	WBGene00021080	W08A12.3	protein_coding
V	3673380	3676632	3253	+	WBGene00021081	pals-33	protein_coding
V	2264912	2267058	2147	-	WBGene00021163	nhr-275	protein_coding
V	2207101	2210272	3172	+	WBGene00021164	svh-11	protein_coding
V	2197997	2201415	3419	-	WBGene00021167	cyp-32B1	protein_coding
V	2201435	2204400	2966	-	WBGene00021168	cyp-33C12	protein_coding
V	2401357	2404989	3633	+	WBGene00021217	Y19D10A.2	protein_coding
V	2382233	2384422	2190	+	WBGene00021220	Y19D10A.5	protein_coding
V	2348215	2350325	2111	-	WBGene00021222	irld-53	protein_coding
V	2353359	2356582	3224	-	WBGene00021223	Y19D10A.8	protein_coding
V	2301716	2303875	2160	-	WBGene00021232	irld-15	protein_coding
V	2318490	2321101	2612	-	WBGene00021235	Y19D10B.6	protein_coding
V	1918509	1921101	2593	+	WBGene00021301	Y32G9A.2	protein_coding
V	1911402	1913619	2218	+	WBGene00021302	Y32G9A.3	protein_coding
V	6067816	6070068	2253	-	WBGene00021390	fbxa-214	protein_coding
V	418732	421840	3109	+	WBGene00021448	Y39D8A.1	protein_coding
V	370333	373800	3468	+	WBGene00021449	mltn-7	protein_coding
V	2057537	2061136	3600	+	WBGene00021487	comt-3	protein_coding
V	2043240	2046056	2817	-	WBGene00021490	Y40B10A.5	protein_coding
V	4144505	4147581	3077	+	WBGene00021554	Y45G5AL.1	protein_coding
V	4164554	4166825	2272	+	WBGene00021556	Y45G5AM.3	protein_coding
V	4166635	4170238	3604	-	WBGene00021559	Y45G5AM.7	protein_coding
V	2565683	2568882	3200	+	WBGene00021565	Y45G12C.1	protein_coding
V	2544004	2546063	2060	+	WBGene00021568	srt-2	protein_coding
V	2540084	2543004	2921	+	WBGene00021569	Y45G12C.6	protein_coding
V	2527360	2529862	2503	+	WBGene00021570	srd-73	protein_coding
V	2531566	2534485	2920	-	WBGene00021572	srd-72	protein_coding
V	1807460	1809582	2123	+	WBGene00021599	srt-42	protein_coding
V	1811345	1814884	3540	-	WBGene00021601	Y46H3A.5	protein_coding
V	1757156	1760303	3148	+	WBGene00021603	clec-204	protein_coding
V	5195241	5198340	3100	-	WBGene00021614	Y47A7.2	protein_coding
V	696524	699589	3066	-	WBGene00021709	ugt-29	protein_coding
V	710453	712982	2530	-	WBGene00021710	cyp-33C11	protein_coding
V	1100580	1104131	3552	+	WBGene00021741	Y50D4B.2	protein_coding
V	1084316	1087324	3009	+	WBGene00021745	Y50D4B.6	protein_coding
V	946723	949860	3138	-	WBGene00021750	Y50D4C.6	protein_coding
V	7060530	7062816	2287	+	WBGene00021956	Y57E12AL.1	protein_coding
V	6931475	6934312	2838	-	WBGene00021963	lipl-6	protein_coding
V	5077854	5080903	3050	-	WBGene00021977	Y58A7A.3	protein_coding
V	5081988	5085007	3020	-	WBGene00021978	Y58A7A.4	protein_coding
V	5087493	5089547	2055	-	WBGene00021980	glb-32	protein_coding
V	268307	271419	3113	+	WBGene00021981	lgc-26	protein_coding
V	3115273	3118287	3015	+	WBGene00022262	Y73C8C.3	protein_coding
V	3099918	3102149	2232	-	WBGene00022263	Y73C8C.4	protein_coding
V	3125496	3127770	2275	-	WBGene00022267	Y73C8C.10	protein_coding
V	1270911	1273045	2135	+	WBGene00022288	Y75B7B.1	protein_coding
V	7986160	7988336	2177	+	WBGene00022392	Y97E10AL.1	protein_coding
V	7983879	7985954	2076	+	WBGene00022393	abhd-12	protein_coding
V	8001463	8004709	3247	+	WBGene00022396	Y97E10AR.1	protein_coding
V	8008016	8010233	2218	-	WBGene00022399	Y97E10AR.4	protein_coding
V	7943868	7946857	2990	+	WBGene00022403	Y97E10B.1	protein_coding
V	4317876	4319967	2092	-	WBGene00022527	ZC132.9	protein_coding
V	4247955	4250147	2193	-	WBGene00022528	srt-13	protein_coding
V	4253502	4256574	3073	-	WBGene00022529	srt-14	protein_coding
V	8674586	8677293	2708	-	WBGene00022540	ZC190.6	protein_coding
V	8739436	8742311	2876	+	WBGene00022546	ZC196.2	protein_coding
V	8733106	8735785	2680	+	WBGene00022548	ZC196.4	protein_coding
V	8729400	8732795	3396	+	WBGene00022549	ZC196.5	protein_coding
V	8726528	8728957	2430	+	WBGene00022550	droe-8	protein_coding
V	5792331	5794857	2527	+	WBGene00022576	ZC250.2	protein_coding
V	5794688	5798232	3545	-	WBGene00022577	nstp-3	protein_coding
V	5465822	5468589	2768	-	WBGene00022589	ZC317.6	protein_coding
V	5468645	5471030	2386	-	WBGene00022590	ZC317.7	protein_coding
V	6727522	6730229	2708	+	WBGene00022623	ZC487.1	protein_coding
V	6720322	6722478	2157	-	WBGene00022624	ZC487.2	protein_coding
V	8054430	8057669	3240	+	WBGene00022627	ZC513.2	protein_coding
V	8047006	8049595	2590	+	WBGene00022628	ZC513.3	protein_coding
V	396593	398933	2341	+	WBGene00022639	nhr-253	protein_coding
V	392628	395120	2493	+	WBGene00022640	nhr-254	protein_coding
V	388697	391600	2904	+	WBGene00022641	ZK6.6	protein_coding
V	381908	384688	2781	+	WBGene00022643	ZK6.8	protein_coding
V	411782	414759	2978	-	WBGene00022644	dod-19	protein_coding
V	7701048	7703636	2589	-	WBGene00022655	srsx-40	protein_coding
V	593259	595677	2419	+	WBGene00022757	ZK488.5	protein_coding
V	590482	592537	2056	+	WBGene00022758	ZK488.6	protein_coding
V	9263800	9266499	2700	-	WBGene00022788	slc-17.7	protein_coding
V	9284124	9287560	3437	-	WBGene00022789	lron-2	protein_coding
V	1738865	1741174	2310	-	WBGene00022807	srab-25	protein_coding
V	7801505	7804208	2704	-	WBGene00022812	uvs-1	protein_coding
V	6590583	6593744	3162	+	WBGene00022843	ZK1055.2	protein_coding
V	6599189	6602606	3418	-	WBGene00022847	ZK1055.6	protein_coding
V	6602720	6605375	2656	-	WBGene00022848	ZK1055.7	protein_coding
V	16687527	16689866	2340	+	WBGene00023505	srz-102	protein_coding
V	19978721	19981882	3162	-	WBGene00023519	Y60A3A.24	protein_coding
V	9876687	9879504	2818	-	WBGene00043059	srab-26	protein_coding
V	10217024	10219529	2506	+	WBGene00044020	ZK856.14	protein_coding
V	9213754	9217258	3505	-	WBGene00044077	pacs-1	protein_coding
V	14074460	14076725	2266	+	WBGene00044081	D1086.11	protein_coding
V	3471870	3475121	3252	-	WBGene00044088	oac-2	protein_coding
V	2394485	2396635	2151	+	WBGene00044099	srd-75	protein_coding
V	13926698	13929320	2623	+	WBGene00044115	srxa-12	protein_coding
V	14936887	14939371	2485	+	WBGene00044176	C30G7.2	protein_coding
V	14942130	14945704	3575	-	WBGene00044177	C30G7.3	protein_coding
V	13646879	13649780	2902	-	WBGene00044200	H37A05.4	protein_coding
V	14107811	14110051	2241	+	WBGene00044201	H39E23.3	protein_coding
V	16269800	16272575	2776	+	WBGene00044205	T13F3.8	protein_coding
V	19990733	19994193	3461	-	WBGene00044211	Y60A3A.25	protein_coding
V	10651995	10654265	2271	-	WBGene00044286	ugt-35	protein_coding
V	4336762	4338925	2164	+	WBGene00044529	irld-1	protein_coding
V	4648827	4651621	2795	+	WBGene00044533	F41F3.8	protein_coding
V	4912764	4915079	2316	-	WBGene00044534	H23N18.6	protein_coding
V	7612344	7615648	3305	+	WBGene00044549	clec-215	protein_coding
V	8455396	8457609	2214	+	WBGene00044553	T23B12.11	protein_coding
V	9165815	9168189	2375	-	WBGene00044582	B0222.11	protein_coding
V	2930053	2932188	2136	+	WBGene00044602	C31B8.16	protein_coding
V	9022317	9024813	2497	-	WBGene00044617	bus-1	protein_coding
V	11773720	11776636	2917	+	WBGene00044631	bus-18	protein_coding
V	7089471	7091610	2140	-	WBGene00044699	nhr-286	protein_coding
V	3589008	3592199	3192	-	WBGene00044705	T22F3.12	protein_coding
V	1315643	1317919	2277	-	WBGene00044774	F16B3.3	protein_coding
V	12177073	12179438	2366	-	WBGene00044790	clec-224	protein_coding
V	17919026	17921754	2729	+	WBGene00044795	C06H5.8	protein_coding
V	5880364	5882509	2146	+	WBGene00044803	C02G6.3	protein_coding
V	4832011	4834377	2367	-	WBGene00045308	C37H5.14	protein_coding
V	13473333	13476450	3118	-	WBGene00045340	T10G3.8	protein_coding
V	14067866	14071215	3350	+	WBGene00045355	D1086.17	protein_coding
V	16401891	16405348	3458	+	WBGene00045357	F13A7.14	protein_coding
V	18738955	18742208	3254	-	WBGene00045364	clec-250	protein_coding
V	16654542	16657432	2891	+	WBGene00045380	W06G6.15	protein_coding
V	17080492	17082818	2327	-	WBGene00045500	T05E12.9	protein_coding
V	17620566	17622750	2185	+	WBGene00045501	Y6G8.8	protein_coding
V	16618338	16620923	2586	-	WBGene00050904	Y70C5A.3	protein_coding
V	17236592	17239246	2655	+	WBGene00050934	T19C9.10	protein_coding
V	16658230	16660916	2687	-	WBGene00077464	Y70C5B.2	protein_coding
V	201600	204279	2680	+	WBGene00077643	trpp-1	protein_coding
V	7868461	7870807	2347	-	WBGene00077712	nipi-4	protein_coding
V	3018361	3021406	3046	-	WBGene00077758	irld-12	protein_coding
V	10942461	10944514	2054	+	WBGene00077761	zip-9	protein_coding
V	9946321	9948940	2620	-	WBGene00077775	nlp-58	protein_coding
V	6692247	6694768	2522	-	WBGene00175027	W02F12.8	protein_coding
V	5936939	5939188	2250	+	WBGene00189957	M03F8.7	protein_coding
V	18709810	18711856	2047	+	WBGene00194680	Y17D7C.6	protein_coding
V	19465146	19467648	2503	-	WBGene00194815	Y43F8B.23	protein_coding
V	8624101	8626975	2875	+	WBGene00194909	F41E6.17	protein_coding
V	6780466	6783194	2729	+	WBGene00194910	ZC404.15	protein_coding
V	7798379	7800664	2286	+	WBGene00194921	ZK742.7	protein_coding
V	17625206	17627598	2393	+	WBGene00195165	F57G4.11	protein_coding
V	5366780	5368892	2113	-	WBGene00195171	T09D3.9	protein_coding
V	757936	761335	3400	-	WBGene00206359	C05E4.15	protein_coding
V	15530783	15533212	2430	-	WBGene00219316	F21A3.11	protein_coding
V	10967919	10970170	2252	-	WBGene00219325	F17C11.22	protein_coding
V	16528096	16530365	2270	+	WBGene00219326	F36D3.16	protein_coding
V	2298945	2301005	2061	-	WBGene00235117	Y19D10B.8	protein_coding
V	4320245	4322806	2562	-	WBGene00235310	R02D1.2	protein_coding
V	2018989	2022467	3479	+	WBGene00268196	F59A7.14	protein_coding
V	3493634	3496980	3347	-	WBGene00269378	C07G3.15	protein_coding
V	11570690	11572990	2301	-	WBGene00305173	H12C20.7	protein_coding
X	11339874	11343327	3454	+	WBGene00000040	aco-1	protein_coding
X	6709538	6712925	3388	+	WBGene00000043	acr-3	protein_coding
X	4022267	4025641	3375	+	WBGene00000049	acr-10	protein_coding
X	13532853	13536459	3607	+	WBGene00000051	acr-12	protein_coding
X	7503780	7506633	2854	-	WBGene00000061	lgc-11	protein_coding
X	7794875	7798298	3424	-	WBGene00000075	adm-4	protein_coding
X	9650999	9653116	2118	-	WBGene00000085	aex-2	protein_coding
X	7140504	7143641	3138	-	WBGene00000116	alh-10	protein_coding
X	4571437	4573914	2478	+	WBGene00000133	amt-1	protein_coding
X	954975	957762	2788	+	WBGene00000164	apm-3	protein_coding
X	11068527	11072047	3521	+	WBGene00000166	apt-9	protein_coding
X	4702167	4704977	2811	-	WBGene00000176	aqp-8	protein_coding
X	950782	954233	3452	+	WBGene00000195	arr-1	protein_coding
X	11321079	11324251	3173	-	WBGene00000212	asm-2	protein_coding
X	13218985	13221462	2478	-	WBGene00000217	asp-4	protein_coding
X	6201875	6204746	2872	-	WBGene00000245	bca-1	protein_coding
X	8208748	8211149	2402	-	WBGene00000391	cdd-1	protein_coding
X	13515856	13518911	3056	-	WBGene00000406	cdk-4	protein_coding
X	8414006	8416919	2914	-	WBGene00000422	ced-8	protein_coding
X	14183221	14186566	3346	-	WBGene00000457	ceh-36	protein_coding
X	1853874	1856172	2299	-	WBGene00000460	ceh-39	protein_coding
X	12318126	12320777	2652	-	WBGene00000461	ceh-40	protein_coding
X	1846608	1848675	2068	-	WBGene00000462	ceh-41	protein_coding
X	3397613	3400017	2405	-	WBGene00000503	cht-1	protein_coding
X	3576606	3578830	2225	+	WBGene00000515	ckc-1	protein_coding
X	7431465	7433535	2071	+	WBGene00000523	clc-2	protein_coding
X	7433569	7435736	2168	+	WBGene00000526	clc-5	protein_coding
X	6875169	6877536	2368	-	WBGene00000746	col-173	protein_coding
X	10999663	11001850	2188	-	WBGene00000750	col-177	protein_coding
X	15951494	15954789	3296	+	WBGene00000759	col-186	protein_coding
X	16072895	16074923	2029	+	WBGene00000760	col-187	protein_coding
X	2255848	2258101	2254	-	WBGene00000797	crn-4	protein_coding
X	14684877	14688322	3446	+	WBGene00000822	csq-1	protein_coding
X	8911293	8914261	2969	+	WBGene00000884	cyn-8	protein_coding
X	8084210	8086550	2341	-	WBGene00000929	dao-3	protein_coding
X	1486532	1489326	2795	+	WBGene00000988	dhs-25	protein_coding
X	7661891	7664919	3029	-	WBGene00000992	dhs-29	protein_coding
X	15031180	15034832	3653	-	WBGene00001096	dsc-1	protein_coding
X	9698659	9701732	3074	+	WBGene00001123	dyf-7	protein_coding
X	763752	766739	2988	+	WBGene00001127	dyf-11	protein_coding
X	12877480	12880328	2849	+	WBGene00001149	bcat-1	protein_coding
X	7823654	7825769	2116	+	WBGene00001169	eef-1A.2	protein_coding
X	5931122	5934532	3411	+	WBGene00001175	egl-6	protein_coding
X	489685	492318	2634	+	WBGene00001185	egl-17	protein_coding
X	10481240	10483441	2202	+	WBGene00001250	elt-2	protein_coding
X	14815798	14818514	2717	-	WBGene00001329	epn-1	protein_coding
X	3800033	3803464	3432	-	WBGene00001335	F35A5.8	protein_coding
X	3196064	3199349	3286	-	WBGene00001400	fax-1	protein_coding
X	3740207	3742323	2117	-	WBGene00001434	fkh-2	protein_coding
X	8528250	8531076	2827	+	WBGene00001448	flp-5	protein_coding
X	2192504	2195348	2845	+	WBGene00001515	gap-1	protein_coding
X	15586786	15590397	3612	-	WBGene00001520	gas-1	protein_coding
X	1986469	1989607	3139	-	WBGene00001569	meg-3	protein_coding
X	6820005	6823268	3264	-	WBGene00001572	gei-15	protein_coding
X	3496026	3499169	3144	+	WBGene00001620	glt-1	protein_coding
X	9293666	9296622	2957	-	WBGene00001638	gly-13	protein_coding
X	2118894	2121061	2168	-	WBGene00001667	gpa-5	protein_coding
X	13191212	13194390	3179	+	WBGene00001668	gpa-6	protein_coding
X	14696411	14699977	3567	-	WBGene00001828	hch-1	protein_coding
X	5851953	5854263	2311	-	WBGene00001984	hog-1	protein_coding
X	6089028	6092124	3097	-	WBGene00002007	hsp-3	protein_coding
X	6233151	6235543	2393	-	WBGene00002024	hsp-43	protein_coding
X	11204103	11207155	3053	-	WBGene00002029	hst-2	protein_coding
X	5275561	5278519	2959	+	WBGene00002031	hst-6	protein_coding
X	4696754	4699461	2708	-	WBGene00002044	hyl-2	protein_coding
X	16267197	16270069	2873	-	WBGene00002051	ifa-3	protein_coding
X	813854	815929	2076	-	WBGene00002058	ifd-2	protein_coding
X	1104212	1106251	2040	+	WBGene00002062	ife-4	protein_coding
X	768596	770776	2181	+	WBGene00002071	ile-2	protein_coding
X	5996156	5998243	2088	+	WBGene00002125	inx-3	protein_coding
X	8300027	8302399	2373	-	WBGene00002127	inx-5	protein_coding
X	6031469	6034515	3047	+	WBGene00002146	ipp-5	protein_coding
X	8243131	8246369	3239	-	WBGene00002234	kqt-2	protein_coding
X	14577935	14580923	2989	+	WBGene00002282	let-4	protein_coding
X	11560915	11563707	2793	+	WBGene00002975	lev-8	protein_coding
X	3958552	3961907	3356	+	WBGene00003007	lin-18	protein_coding
X	2089704	2093256	3553	+	WBGene00003087	lsy-2	protein_coding
X	4271165	4274216	3052	-	WBGene00003179	mec-18	protein_coding
X	11548608	11550692	2085	+	WBGene00003239	mig-2	protein_coding
X	5945813	5948869	3057	-	WBGene00003254	mig-23	protein_coding
X	10027856	10030130	2275	+	WBGene00003368	mkk-4	protein_coding
X	4758804	4761640	2837	-	WBGene00003377	mls-2	protein_coding
X	7422641	7424913	2273	-	WBGene00003380	mnm-2	protein_coding
X	10136129	10138620	2492	-	WBGene00003384	moc-1	protein_coding
X	16262289	16265686	3398	-	WBGene00003485	mua-6	protein_coding
X	14895145	14898449	3305	+	WBGene00003517	nac-1	protein_coding
X	10960914	10963503	2590	-	WBGene00003529	nas-10	protein_coding
X	6713577	6716357	2781	+	WBGene00003530	nas-11	protein_coding
X	15425099	15428253	3155	-	WBGene00003532	nas-13	protein_coding
X	777721	780533	2813	+	WBGene00003534	nas-15	protein_coding
X	6451698	6455257	3560	-	WBGene00003551	nas-33	protein_coding
X	960452	963271	2820	-	WBGene00003563	ncs-1	protein_coding
X	1054081	1056846	2766	+	WBGene00003565	ncs-3	protein_coding
X	14558504	14561432	2929	+	WBGene00003602	nhr-3	protein_coding
X	8473722	8476178	2457	-	WBGene00003613	nhr-14	protein_coding
X	17662446	17665216	2771	+	WBGene00003744	nlp-6	protein_coding
X	4767152	4769985	2834	-	WBGene00003807	npr-1	protein_coding
X	9539905	9542329	2425	+	WBGene00003828	nuc-1	protein_coding
X	12458979	12461657	2679	-	WBGene00003854	odr-7	protein_coding
X	16536890	16540213	3324	+	WBGene00003933	pat-9	protein_coding
X	4524155	4526536	2382	+	WBGene00003963	pdi-2	protein_coding
X	6901378	6903986	2609	+	WBGene00003987	pes-23	protein_coding
X	633368	636993	3626	-	WBGene00004011	pha-2	protein_coding
X	3247042	3250531	3490	-	WBGene00004124	pqn-37	protein_coding
X	13965676	13968676	3001	-	WBGene00004126	pqn-39	protein_coding
X	3940130	3943313	3184	-	WBGene00004184	T19D2.2	protein_coding
X	6110741	6112917	2177	-	WBGene00004193	prx-3	protein_coding
X	4508509	4510945	2437	+	WBGene00004356	rhi-1	protein_coding
X	10589770	10593334	3565	-	WBGene00004749	sdn-1	protein_coding
X	915867	918290	2424	+	WBGene00004769	sel-12	protein_coding
X	7959453	7961723	2271	-	WBGene00004774	sem-5	protein_coding
X	13328067	13331263	3197	+	WBGene00004801	sir-2.2	protein_coding
X	13331686	13333846	2161	+	WBGene00004802	sir-2.3	protein_coding
X	6719669	6723066	3398	-	WBGene00004876	smf-1	protein_coding
X	6716195	6718695	2501	-	WBGene00004877	smf-2	protein_coding
X	7327601	7329705	2105	+	WBGene00004912	sng-1	protein_coding
X	14690816	14693005	2190	-	WBGene00004950	sox-3	protein_coding
X	4514093	4516895	2803	+	WBGene00005008	spr-3	protein_coding
X	13890809	13893356	2548	-	WBGene00005063	sra-37	protein_coding
X	13897934	13900147	2214	-	WBGene00005064	sra-38	protein_coding
X	13478621	13481804	3184	-	WBGene00005128	srd-50	protein_coding
X	13482649	13484913	2265	-	WBGene00005129	srd-51	protein_coding
X	1413144	1416545	3402	+	WBGene00005244	srh-19	protein_coding
X	4257061	4259321	2261	+	WBGene00005717	srv-6	protein_coding
X	11619953	11622097	2145	-	WBGene00006065	sto-3	protein_coding
X	11644126	11647425	3300	+	WBGene00006066	sto-4	protein_coding
X	1969875	1972703	2829	+	WBGene00006139	str-79	protein_coding
X	3267294	3270906	3613	-	WBGene00006308	sul-1	protein_coding
X	17528344	17531985	3642	+	WBGene00006319	sup-10	protein_coding
X	3904584	3907673	3090	+	WBGene00006321	sup-12	protein_coding
X	16376588	16380058	3471	+	WBGene00006353	sur-7	protein_coding
X	14581622	14584378	2757	+	WBGene00006366	sym-1	protein_coding
X	5349098	5352016	2919	+	WBGene00006371	syx-3	protein_coding
X	13960149	13962830	2682	+	WBGene00006372	syx-2	protein_coding
X	3731894	3734036	2143	-	WBGene00006408	tag-18	protein_coding
X	5609110	5611255	2146	-	WBGene00006411	octr-1	protein_coding
X	3729281	3731961	2681	+	WBGene00006454	aex-4	protein_coding
X	8418650	8422055	3406	-	WBGene00006472	tag-123	protein_coding
X	14589624	14591821	2198	+	WBGene00006524	tap-1	protein_coding
X	9455485	9458348	2864	-	WBGene00006534	tba-8	protein_coding
X	3252800	3256269	3470	+	WBGene00006535	tba-9	protein_coding
X	9434452	9436893	2442	-	WBGene00006538	tbb-4	protein_coding
X	1671148	1674156	3009	-	WBGene00006550	tbx-31	protein_coding
X	14726626	14729503	2878	-	WBGene00006634	tsp-8	protein_coding
X	9163164	9166443	3280	+	WBGene00006637	tsp-11	protein_coding
X	3681164	3684234	3071	+	WBGene00006643	tsp-17	protein_coding
X	12031592	12034037	2446	-	WBGene00006646	tsp-20	protein_coding
X	13639877	13642359	2483	+	WBGene00006673	twk-20	protein_coding
X	8869625	8871901	2277	+	WBGene00006716	ubc-21	protein_coding
X	7682896	7686037	3142	+	WBGene00006757	unc-18	protein_coding
X	3408674	3411615	2942	-	WBGene00006810	unc-78	protein_coding
X	7570374	7573619	3246	-	WBGene00006827	unc-98	protein_coding
X	5074399	5077961	3563	-	WBGene00006861	cal-5	protein_coding
X	3537635	3540943	3309	+	WBGene00006863	gyg-1	protein_coding
X	9847275	9849805	2531	+	WBGene00006881	vab-15	protein_coding
X	17393939	17396556	2618	-	WBGene00006886	vap-1	protein_coding
X	4191094	4193144	2051	+	WBGene00006921	vha-12	protein_coding
X	3480250	3483666	3417	+	WBGene00006952	wrt-6	protein_coding
X	8041313	8044409	3097	+	WBGene00006962	xol-1	protein_coding
X	12315568	12318184	2617	+	WBGene00006966	xtr-2	protein_coding
X	5186916	5189077	2162	-	WBGene00006983	zig-6	protein_coding
X	17151522	17154647	3126	+	WBGene00007011	mdt-1.2	protein_coding
X	7565323	7568145	2823	+	WBGene00007059	vps-52	protein_coding
X	15284115	15286484	2370	+	WBGene00007262	jud-4	protein_coding
X	11257361	11260551	3191	+	WBGene00007266	C03A3.1	protein_coding
X	11262848	11266324	3477	+	WBGene00007267	C03A3.2	protein_coding
X	13660506	13662980	2475	+	WBGene00007285	C04A11.1	protein_coding
X	13665958	13668828	2871	-	WBGene00007286	C04A11.2	protein_coding
X	12283281	12285316	2036	+	WBGene00007290	C04B4.2	protein_coding
X	12290839	12293399	2561	+	WBGene00007292	C04B4.4	protein_coding
X	10842194	10844674	2481	-	WBGene00007317	C05A9.2	protein_coding
X	11160837	11164006	3170	+	WBGene00007325	C05C9.1	protein_coding
X	12938695	12940958	2264	-	WBGene00007344	C05E7.2	protein_coding
X	12965463	12968974	3512	+	WBGene00007346	frpr-2	protein_coding
X	14747303	14750442	3140	+	WBGene00007348	C05G5.2	protein_coding
X	14754026	14756081	2056	+	WBGene00007350	sucl-1	protein_coding
X	9519019	9521751	2733	+	WBGene00007410	C07B5.6	protein_coding
X	11053915	11056979	3065	+	WBGene00007482	C09F12.2	protein_coding
X	11040730	11042877	2148	-	WBGene00007483	C09F12.3	protein_coding
X	15959067	15962348	3282	+	WBGene00007487	C09G1.5	protein_coding
X	14304930	14307767	2838	-	WBGene00007528	C11H1.2	protein_coding
X	14327409	14330195	2787	+	WBGene00007531	C11H1.7	protein_coding
X	10233739	10236944	3206	-	WBGene00007591	zipt-13	protein_coding
X	12065208	12067433	2226	+	WBGene00007594	lgc-23	protein_coding
X	12070631	12073864	3234	-	WBGene00007595	C15A7.2	protein_coding
X	9922862	9925173	2312	-	WBGene00007650	ugt-23	protein_coding
X	15004058	15007308	3251	-	WBGene00007668	C18B12.6	protein_coding
X	12219660	12222745	3086	+	WBGene00007691	cest-8	protein_coding
X	12229951	12233122	3172	+	WBGene00007693	cest-7	protein_coding
X	14845937	14849217	3281	+	WBGene00007772	egrh-1	protein_coding
X	14863609	14865844	2236	-	WBGene00007773	C27C12.3	protein_coding
X	14854086	14856522	2437	+	WBGene00007774	C27C12.4	protein_coding
X	14849275	14852631	3357	+	WBGene00007775	acd-3	protein_coding
X	13416078	13418220	2143	+	WBGene00007811	C29F7.2	protein_coding
X	16082347	16085799	3453	+	WBGene00007817	C30F2.3	protein_coding
X	16094670	16096983	2314	+	WBGene00007819	C30F2.5	protein_coding
X	13996338	13999351	3014	+	WBGene00007847	C31E10.6	protein_coding
X	10485350	10487504	2155	+	WBGene00007894	C33D3.3	protein_coding
X	14076237	14078674	2438	-	WBGene00007905	C33G3.5	protein_coding
X	12932205	12934978	2774	-	WBGene00007934	C34E7.4	protein_coding
X	11216000	11218150	2151	+	WBGene00007942	idh-2	protein_coding
X	11533593	11536574	2982	+	WBGene00007957	C35C5.8	protein_coding
X	11556244	11559866	3623	+	WBGene00007959	C35C5.10	protein_coding
X	14170730	14174063	3334	-	WBGene00007993	idhb-1	protein_coding
X	14176040	14178608	2569	+	WBGene00007994	C37E2.2	protein_coding
X	10460473	10463642	3170	-	WBGene00008021	C39B10.1	protein_coding
X	11693464	11695753	2290	+	WBGene00008085	smcl-1	protein_coding
X	11690541	11692967	2427	+	WBGene00008086	C44C10.5	protein_coding
X	11713237	11716513	3277	-	WBGene00008089	C44C10.9	protein_coding
X	14572719	14576125	3407	+	WBGene00008093	lron-1	protein_coding
X	14596259	14599345	3087	-	WBGene00008095	C44H4.6	protein_coding
X	11988314	11991292	2979	+	WBGene00008210	C49F5.6	protein_coding
X	12843311	12845387	2077	+	WBGene00008260	C52G5.2	protein_coding
X	13048558	13050885	2328	+	WBGene00008279	C53C7.3	protein_coding
X	11721672	11723800	2129	-	WBGene00008369	D1053.4	protein_coding
X	12256644	12258967	2324	+	WBGene00008450	E01G6.2	protein_coding
X	12241646	12244657	3012	+	WBGene00008451	cest-3	protein_coding
X	13391949	13395071	3123	-	WBGene00008518	irld-2	protein_coding
X	13406674	13409643	2970	-	WBGene00008519	cyp-13B1	protein_coding
X	13449586	13451678	2093	-	WBGene00008526	F02D10.6	protein_coding
X	10139372	10142013	2642	-	WBGene00008602	oac-14	protein_coding
X	10154817	10156989	2173	+	WBGene00008604	F09B9.5	protein_coding
X	15098066	15100419	2354	-	WBGene00008606	dhhc-1	protein_coding
X	15095343	15097954	2612	-	WBGene00008607	F09B12.3	protein_coding
X	15084695	15088285	3591	+	WBGene00008609	F09B12.5	protein_coding
X	12987332	12990579	3248	-	WBGene00008690	F11C1.1	protein_coding
X	12977074	12979929	2856	+	WBGene00008693	F11C1.4	protein_coding
X	11178899	11181274	2376	+	WBGene00008736	gnrr-6	protein_coding
X	10691943	10695100	3158	+	WBGene00008748	yap-1	protein_coding
X	10695312	10697894	2583	+	WBGene00008749	plpp-1.3	protein_coding
X	10524898	10528452	3555	+	WBGene00008805	git-1	protein_coding
X	10521806	10524565	2760	-	WBGene00008806	mboa-7	protein_coding
X	9706384	9708566	2183	+	WBGene00008865	F15G9.1	protein_coding
X	9709762	9713117	3356	+	WBGene00008869	F15G9.6	protein_coding
X	14095737	14098668	2932	-	WBGene00008880	F16B12.4	protein_coding
X	14111263	14113447	2185	-	WBGene00008884	nhr-281	protein_coding
X	13105241	13108543	3303	+	WBGene00008925	F17H10.1	protein_coding
X	13113772	13116390	2619	+	WBGene00008926	F17H10.2	protein_coding
X	13529088	13531941	2854	+	WBGene00008940	F18H3.4	protein_coding
X	10005304	10008764	3461	-	WBGene00008952	F19C6.3	protein_coding
X	10015037	10018025	2989	-	WBGene00008953	F19C6.4	protein_coding
X	9982402	9984939	2538	-	WBGene00008954	F19C6.5	protein_coding
X	13834427	13837125	2699	+	WBGene00008955	F19D8.2	protein_coding
X	12368452	12371421	2970	-	WBGene00008958	rif-1.2	protein_coding
X	12360827	12363127	2301	+	WBGene00008961	F19H6.6	protein_coding
X	14976117	14978716	2600	+	WBGene00008975	F20D1.3	protein_coding
X	10183995	10186254	2260	+	WBGene00009000	arrd-28	protein_coding
X	9889633	9892328	2696	-	WBGene00009023	F21G4.1	protein_coding
X	9897344	9899476	2133	-	WBGene00009025	phf-34	protein_coding
X	9906140	9908913	2774	+	WBGene00009026	F21G4.5	protein_coding
X	14425290	14428152	2863	-	WBGene00009085	F23D12.1	protein_coding
X	14141946	14144889	2944	+	WBGene00009231	ceh-89	protein_coding
X	14137810	14140140	2331	-	WBGene00009232	nkat-1	protein_coding
X	14869014	14871880	2867	-	WBGene00009301	F31F6.2	protein_coding
X	14898505	14900854	2350	+	WBGene00009303	lips-8	protein_coding
X	14732281	14734457	2177	+	WBGene00009358	F33C8.4	protein_coding
X	9648524	9650928	2405	+	WBGene00009381	F34H10.4	protein_coding
X	9798835	9801087	2253	+	WBGene00009484	F36G3.3	protein_coding
X	14703700	14706861	3162	-	WBGene00009574	F40E10.6	protein_coding
X	10279599	10282842	3244	+	WBGene00009617	slc-9B.1	protein_coding
X	10282819	10285734	2916	-	WBGene00009619	npr-6	protein_coding
X	10307041	10310466	3426	-	WBGene00009622	F41E7.6	protein_coding
X	10312732	10316005	3274	-	WBGene00009625	F41E7.9	protein_coding
X	10197706	10200375	2670	+	WBGene00009674	nucb-1	protein_coding
X	12492767	12496041	3275	+	WBGene00009727	lips-1	protein_coding
X	11416653	11418767	2115	-	WBGene00009777	F46C3.2	protein_coding
X	13334046	13336810	2765	+	WBGene00009798	F46G10.4	protein_coding
X	10897678	10900114	2437	-	WBGene00009812	suca-1	protein_coding
X	10893567	10896598	3032	-	WBGene00009813	haly-1	protein_coding
X	11444350	11446635	2286	-	WBGene00009842	igeg-2	protein_coding
X	11451616	11454331	2716	-	WBGene00009843	F48C5.2	protein_coding
X	13963503	13965722	2220	+	WBGene00009849	F48F7.3	protein_coding
X	9573615	9577028	3414	-	WBGene00009887	glb-17	protein_coding
X	11589686	11591720	2035	-	WBGene00009930	F52D10.2	protein_coding
X	11617470	11620049	2580	+	WBGene00009931	F52D10.4	protein_coding
X	15866387	15868768	2382	+	WBGene00010009	F53H4.4	protein_coding
X	13605567	13608528	2962	+	WBGene00010032	F54B11.9	protein_coding
X	13578783	13581555	2773	+	WBGene00010034	F54B11.11	protein_coding
X	14625452	14628916	3465	-	WBGene00010058	F54E4.2	protein_coding
X	13755769	13759391	3623	+	WBGene00010115	aakb-1	protein_coding
X	11924433	11927381	2949	+	WBGene00010119	F55G7.1	protein_coding
X	12169094	12171681	2588	-	WBGene00010221	F57G12.1	protein_coding
X	15672513	15675722	3210	-	WBGene00010330	F59D12.2	protein_coding
X	15648190	15650969	2780	-	WBGene00010331	F59D12.3	protein_coding
X	11004984	11008181	3198	-	WBGene00010334	del-5	protein_coding
X	15849885	15852001	2117	+	WBGene00010339	acl-1	protein_coding
X	10533699	10537131	3433	+	WBGene00010341	glo-3	protein_coding
X	10546016	10549132	3117	+	WBGene00010344	F59F5.5	protein_coding
X	15058369	15060403	2035	-	WBGene00010360	fbxa-96	protein_coding
X	13507533	13510120	2588	+	WBGene00010368	H06A10.1	protein_coding
X	15497555	15500281	2727	+	WBGene00010397	suox-1	protein_coding
X	15080779	15084086	3308	-	WBGene00010433	H40L08.1	protein_coding
X	13927036	13929634	2599	-	WBGene00010492	meg-1	protein_coding
X	13922643	13926129	3487	-	WBGene00010493	meg-2	protein_coding
X	13708619	13712009	3391	-	WBGene00010505	K02D3.2	protein_coding
X	13063535	13066944	3410	+	WBGene00010522	K03A11.5	protein_coding
X	14238708	14241350	2643	+	WBGene00010552	K04C1.2	protein_coding
X	14345275	14347673	2399	-	WBGene00010571	K04G11.3	protein_coding
X	14350118	14352873	2756	+	WBGene00010572	wdr-5.2	protein_coding
X	14225573	14228785	3213	+	WBGene00010606	cyp-13B2	protein_coding
X	15607969	15610623	2655	+	WBGene00010700	nipi-3	protein_coding
X	15601067	15603686	2620	+	WBGene00010701	ent-2	protein_coding
X	13262495	13264589	2095	+	WBGene00010704	K09A11.1	protein_coding
X	13265041	13267355	2315	-	WBGene00010705	cyp-14A1	protein_coding
X	13267562	13269686	2125	-	WBGene00010706	cyp-14A2	protein_coding
X	13271837	13274202	2366	-	WBGene00010707	cyp-14A3	protein_coding
X	13275315	13278976	3662	-	WBGene00010708	phf-33	protein_coding
X	10966551	10969901	3351	+	WBGene00010716	lge-1	protein_coding
X	15613797	15616753	2957	-	WBGene00010725	erv-46	protein_coding
X	15611766	15613795	2030	-	WBGene00010726	K09E9.3	protein_coding
X	13714157	13716327	2171	+	WBGene00010773	K11E4.1	protein_coding
X	13861277	13864292	3016	-	WBGene00010835	M03B6.3	protein_coding
X	13858841	13861322	2482	+	WBGene00010836	M03B6.4	protein_coding
X	10626518	10628807	2290	-	WBGene00010902	M79.2	protein_coding
X	12151359	12154105	2747	-	WBGene00010925	mfsd-11	protein_coding
X	14496085	14499436	3352	+	WBGene00010936	ztf-14	protein_coding
X	14474040	14476510	2471	+	WBGene00010937	M163.5	protein_coding
X	13567195	13569954	2760	-	WBGene00010971	R01E6.7	protein_coding
X	14158785	14161734	2950	-	WBGene00010994	lgc-25	protein_coding
X	13084573	13087646	3074	+	WBGene00010996	R03G8.1	protein_coding
X	13090965	13094416	3452	+	WBGene00010998	R03G8.3	protein_coding
X	13282043	13284197	2155	-	WBGene00011009	cyp-14A4	protein_coding
X	10744355	10746488	2134	-	WBGene00011073	R07A4.2	protein_coding
X	9858365	9861738	3374	+	WBGene00011076	scav-5	protein_coding
X	9863580	9866553	2974	+	WBGene00011077	R07B1.5	protein_coding
X	9866655	9869574	2920	+	WBGene00011078	R07B1.6	protein_coding
X	10330539	10333351	2813	-	WBGene00011105	R07E3.4	protein_coding
X	10324163	10327456	3294	-	WBGene00011106	acl-5	protein_coding
X	11118959	11121005	2047	-	WBGene00011139	R08B4.3	protein_coding
X	12638456	12640559	2104	-	WBGene00011154	R09A8.5	protein_coding
X	16196911	16199250	2340	-	WBGene00011228	R11.3	protein_coding
X	16314922	16317729	2808	-	WBGene00011310	T01B4.3	protein_coding
X	10719548	10722054	2507	-	WBGene00011315	mbr-1	protein_coding
X	12109166	12111300	2135	+	WBGene00011354	lgc-13	protein_coding
X	12121585	12125048	3464	+	WBGene00011359	lgc-17	protein_coding
X	12125608	12128000	2393	+	WBGene00011360	lgc-18	protein_coding
X	11659510	11661660	2151	-	WBGene00011440	sfxn-1.5	protein_coding
X	11653606	11656569	2964	-	WBGene00011441	T04F8.2	protein_coding
X	11648188	11650851	2664	-	WBGene00011443	cutl-11	protein_coding
X	11677507	11680980	3474	-	WBGene00011445	T04F8.7	protein_coding
X	11674416	11677523	3108	+	WBGene00011447	T04F8.9	protein_coding
X	10787503	10789700	2198	+	WBGene00011460	ttr-14	protein_coding
X	10789611	10792535	2925	-	WBGene00011462	vap-2	protein_coding
X	179786	182169	2384	-	WBGene00011611	T08D2.6	protein_coding
X	11944285	11946838	2554	-	WBGene00011614	nfya-1	protein_coding
X	11948844	11951893	3050	+	WBGene00011615	lsd-1	protein_coding
X	9757271	9759306	2036	+	WBGene00011642	T09B9.1	protein_coding
X	9761479	9764922	3444	-	WBGene00011643	slc-17.9	protein_coding
X	9759297	9761366	2070	-	WBGene00011644	T09B9.3	protein_coding
X	9771697	9774352	2656	-	WBGene00011645	T09B9.4	protein_coding
X	9777781	9780412	2632	+	WBGene00011646	T09B9.5	protein_coding
X	15178133	15181465	3333	-	WBGene00011680	T10B10.3	protein_coding
X	15190123	15193073	2951	+	WBGene00011681	T10B10.4	protein_coding
X	15195883	15199152	3270	-	WBGene00011682	snt-7	protein_coding
X	12454745	12457949	3205	+	WBGene00011820	T18D3.1	protein_coding
X	12464640	12466917	2278	-	WBGene00011821	cdf-2	protein_coding
X	12451190	12454457	3268	-	WBGene00011826	T18D3.9	protein_coding
X	10938194	10941355	3162	-	WBGene00011879	pho-7	protein_coding
X	10916765	10919713	2949	-	WBGene00011882	nstp-9	protein_coding
X	12766818	12769797	2980	-	WBGene00011937	ilc-17.1	protein_coding
X	12574773	12577209	2437	+	WBGene00011989	T24D5.1	protein_coding
X	12583782	12586452	2671	-	WBGene00011990	T24D5.2	protein_coding
X	12018429	12021206	2778	+	WBGene00012158	ucr-2.1	protein_coding
X	10031150	10033284	2135	+	WBGene00012162	sek-6	protein_coding
X	11102587	11105460	2874	-	WBGene00012217	W02H3.1	protein_coding
X	12106404	12108617	2214	-	WBGene00012224	W03G11.2	protein_coding
X	12100191	12103812	3622	-	WBGene00012225	W03G11.3	protein_coding
X	11062123	11064539	2417	+	WBGene00012256	lpr-5	protein_coding
X	11073658	11075961	2304	+	WBGene00012258	W04G3.5	protein_coding
X	11057401	11059793	2393	+	WBGene00012261	lpr-3	protein_coding
X	15801310	15804172	2863	-	WBGene00012413	Y7A5A.7	protein_coding
X	15314874	15317246	2373	-	WBGene00012441	glb-28	protein_coding
X	15330964	15333960	2997	+	WBGene00012443	Y15E3A.4	protein_coding
X	15340558	15344146	3589	+	WBGene00012444	Y15E3A.5	protein_coding
X	13914806	13917171	2366	-	WBGene00012512	ekl-5	protein_coding
X	13910920	13914389	3470	-	WBGene00012513	Y26E6A.2	protein_coding
X	10358383	10360550	2168	+	WBGene00013028	efhc-1	protein_coding
X	14392867	14395367	2501	-	WBGene00013368	Y60A9.1	protein_coding
X	11895585	11898140	2556	-	WBGene00013397	Y62H9A.9	protein_coding
X	11904804	11907363	2560	-	WBGene00013399	Y62H9A.11	protein_coding
X	14901881	14905261	3381	-	WBGene00013497	hex-5	protein_coding
X	11781275	11784330	3056	-	WBGene00013631	Y102F5A.1	protein_coding
X	10054275	10057528	3254	+	WBGene00013866	cbs-1	protein_coding
X	10072209	10074391	2183	-	WBGene00013870	ZC373.5	protein_coding
X	10049460	10052481	3022	+	WBGene00013871	gnrr-3	protein_coding
X	10407150	10410368	3219	+	WBGene00013916	ZC504.1	protein_coding
X	10416631	10419765	3135	-	WBGene00013917	cdk-11.2	protein_coding
X	9965592	9968578	2987	+	WBGene00013920	pssy-1	protein_coding
X	11329724	11332169	2446	+	WBGene00013974	npr-9	protein_coding
X	11324310	11326927	2618	-	WBGene00013975	ZK455.5	protein_coding
X	11318278	11321078	2801	+	WBGene00013976	hizr-1	protein_coding
X	15721646	15723851	2206	+	WBGene00014040	ZK662.5	protein_coding
X	2270992	2274337	3346	-	WBGene00015000	AH9.4	protein_coding
X	7061132	7063336	2205	-	WBGene00015167	B0403.3	protein_coding
X	7066342	7068563	2222	-	WBGene00015168	pdi-6	protein_coding
X	7057724	7061190	3467	+	WBGene00015169	B0403.5	protein_coding
X	9268666	9270853	2188	-	WBGene00015181	B0416.5	protein_coding
X	3715097	3718566	3470	+	WBGene00015292	C01C4.2	protein_coding
X	7435602	7438118	2517	-	WBGene00015294	C01C10.2	protein_coding
X	7439400	7442577	3178	-	WBGene00015295	acl-12	protein_coding
X	8133151	8136326	3176	-	WBGene00015324	C02B8.6	protein_coding
X	3690143	3693238	3096	-	WBGene00015357	C02F12.8	protein_coding
X	6370017	6373383	3367	+	WBGene00015373	C03B1.2	protein_coding
X	6355585	6357707	2123	+	WBGene00015376	C03B1.5	protein_coding
X	6335279	6338051	2773	-	WBGene00015381	C03B1.13	protein_coding
X	5394478	5397400	2923	-	WBGene00015388	C03F11.2	protein_coding
X	5397699	5400584	2886	-	WBGene00015389	scav-1	protein_coding
X	8542757	8546021	3265	-	WBGene00015391	sdha-1	protein_coding
X	358092	360223	2132	+	WBGene00015428	C04E7.1	protein_coding
X	1125615	1128307	2693	+	WBGene00015471	lmp-2	protein_coding
X	1108058	1110160	2103	+	WBGene00015473	C05D9.4	protein_coding
X	1117199	1119405	2207	-	WBGene00015474	C05D9.7	protein_coding
X	4578241	4581727	3487	+	WBGene00015494	C05E11.3	protein_coding
X	16613451	16616871	3421	+	WBGene00015547	ain-1	protein_coding
X	17094283	17096558	2276	-	WBGene00015586	lido-1	protein_coding
X	2668127	2670596	2470	+	WBGene00015621	C09B7.2	protein_coding
X	6015492	6017782	2291	+	WBGene00015625	C09B8.8	protein_coding
X	7416382	7418897	2516	+	WBGene00015662	C10A4.1	protein_coding
X	7410235	7412749	2515	+	WBGene00015663	C10A4.2	protein_coding
X	7405693	7408780	3088	+	WBGene00015664	C10A4.3	protein_coding
X	7401088	7403605	2518	+	WBGene00015665	C10A4.4	protein_coding
X	7393467	7395998	2532	+	WBGene00015666	gad-2	protein_coding
X	16767419	16770498	3080	-	WBGene00015676	mct-6	protein_coding
X	3489293	3491588	2296	+	WBGene00015714	C12D12.3	protein_coding
X	2804964	2807528	2565	-	WBGene00015750	C14A11.5	protein_coding
X	1818664	1821335	2672	-	WBGene00015773	C14E2.4	protein_coding
X	1827738	1830037	2300	-	WBGene00015775	C14E2.6	protein_coding
X	7956195	7958303	2109	-	WBGene00015777	sfxn-2	protein_coding
X	6230906	6233048	2143	-	WBGene00015780	C14F11.4	protein_coding
X	6476810	6479086	2277	+	WBGene00015783	C15B12.1	protein_coding
X	6463412	6465861	2450	+	WBGene00015784	C15B12.2	protein_coding
X	6470433	6473748	3316	-	WBGene00015786	C15B12.4	protein_coding
X	6496803	6499836	3034	-	WBGene00015787	actl-1	protein_coding
X	6474264	6476645	2382	+	WBGene00015788	C15B12.8	protein_coding
X	3167535	3170556	3022	-	WBGene00015792	C15C7.6	protein_coding
X	6115802	6118172	2371	+	WBGene00015799	C15H9.3	protein_coding
X	6106927	6109338	2412	-	WBGene00015802	kynu-1	protein_coding
X	3970457	3973634	3178	-	WBGene00015824	C16B8.4	protein_coding
X	6940217	6943722	3506	+	WBGene00015865	C16E9.1	protein_coding
X	6935730	6939048	3319	+	WBGene00015866	C16E9.2	protein_coding
X	8169930	8172913	2984	+	WBGene00015922	C17H11.2	protein_coding
X	8183008	8185137	2130	-	WBGene00015925	C17H11.5	protein_coding
X	8045518	8047552	2035	+	WBGene00015950	C18A11.4	protein_coding
X	3628316	3630884	2569	+	WBGene00015952	C18B2.1	protein_coding
X	3601831	3604358	2528	+	WBGene00015954	C18B2.3	protein_coding
X	8992406	8994763	2358	+	WBGene00016034	C24A3.4	protein_coding
X	4333057	4336050	2994	-	WBGene00016038	cst-2	protein_coding
X	5064602	5066663	2062	+	WBGene00016068	C24H10.2	protein_coding
X	9114066	9116892	2827	+	WBGene00016087	C25A11.2	protein_coding
X	6631927	6635273	3347	-	WBGene00016089	aexr-1	protein_coding
X	6627963	6631537	3575	-	WBGene00016090	aexr-2	protein_coding
X	5445163	5448085	2923	+	WBGene00016106	C25F6.7	protein_coding
X	1247807	1249838	2032	-	WBGene00016109	C25G6.4	protein_coding
X	5329479	5332339	2861	+	WBGene00016134	C26B9.5	protein_coding
X	5332355	5335468	3114	-	WBGene00016135	C26B9.6	protein_coding
X	8836016	8838125	2110	+	WBGene00016187	C28G1.2	protein_coding
X	5151346	5154378	3033	-	WBGene00016293	C31H2.3	protein_coding
X	8029479	8031614	2136	+	WBGene00016406	C34D10.1	protein_coding
X	9213923	9216875	2953	+	WBGene00016438	C35B8.3	protein_coding
X	7106403	7108577	2175	+	WBGene00016465	C36B7.2	protein_coding
X	7083254	7086012	2759	-	WBGene00016467	C36B7.4	protein_coding
X	7096745	7100338	3594	-	WBGene00016469	C36B7.6	protein_coding
X	1682954	1686419	3466	+	WBGene00016485	meg-4	protein_coding
X	1693883	1696979	3097	-	WBGene00016487	C36C9.4	protein_coding
X	17434445	17438081	3637	+	WBGene00016489	fubl-3	protein_coding
X	5558055	5561330	3276	+	WBGene00016518	C38C5.1	protein_coding
X	7884294	7887479	3186	+	WBGene00016531	pcyt-2.2	protein_coding
X	7889719	7892396	2678	-	WBGene00016532	C39D10.5	protein_coding
X	5717538	5720224	2687	-	WBGene00016568	C41G11.1	protein_coding
X	5109506	5112426	2921	+	WBGene00016599	C42D8.1	protein_coding
X	2409691	2412966	3276	+	WBGene00016614	trpp-12	protein_coding
X	2407467	2409567	2101	+	WBGene00016616	mtpn-1	protein_coding
X	2404024	2407364	3341	+	WBGene00016617	C43H6.4	protein_coding
X	2395283	2398827	3545	+	WBGene00016619	C43H6.6	protein_coding
X	2398811	2402036	3226	-	WBGene00016620	dhhc-9	protein_coding
X	980776	983030	2255	+	WBGene00016641	C44C1.1	protein_coding
X	957881	960585	2705	+	WBGene00016642	chil-10	protein_coding
X	975525	978008	2484	-	WBGene00016644	abhd-3.2	protein_coding
X	7596927	7599824	2898	+	WBGene00016657	C44E12.1	protein_coding
X	4632361	4635780	3420	+	WBGene00016705	slcr-46.1	protein_coding
X	8078048	8080256	2209	+	WBGene00016714	C46F2.1	protein_coding
X	8957530	8961170	3641	-	WBGene00016748	aexr-3	protein_coding
X	4279703	4282633	2931	+	WBGene00016865	ets-9	protein_coding
X	1295253	1298830	3578	+	WBGene00016872	dop-4	protein_coding
X	1272788	1275416	2629	+	WBGene00016874	C52B11.5	protein_coding
X	6860947	6863424	2478	-	WBGene00016896	nep-4	protein_coding
X	7686640	7689219	2580	-	WBGene00016898	clik-2	protein_coding
X	17336637	17338684	2048	+	WBGene00016900	C53C11.2	protein_coding
X	7153889	7156035	2147	-	WBGene00016914	C54D1.7	protein_coding
X	7842541	7845557	3017	+	WBGene00016915	C54D2.1	protein_coding
X	5519955	5522819	2865	-	WBGene00016934	mboa-3	protein_coding
X	5760281	5763392	3112	-	WBGene00016937	tag-294	protein_coding
X	1470680	1472980	2301	-	WBGene00016999	D1005.5	protein_coding
X	1462764	1464799	2036	-	WBGene00017000	D1005.6	protein_coding
X	8546445	8549073	2629	-	WBGene00017048	D2021.4	protein_coding
X	5714522	5717562	3041	+	WBGene00017108	cyp-43A1	protein_coding
X	6991727	6994162	2436	+	WBGene00017154	ugt-57	protein_coding
X	4466518	4469014	2497	+	WBGene00017176	nmur-3	protein_coding
X	4454120	4457304	3185	+	WBGene00017177	F02E8.4	protein_coding
X	4459603	4462465	2863	-	WBGene00017178	atg-16.1	protein_coding
X	1729858	1733447	3590	+	WBGene00017221	dgn-3	protein_coding
X	1710149	1712638	2490	-	WBGene00017225	fbxa-52	protein_coding
X	1716253	1718579	2327	-	WBGene00017226	fbxa-53	protein_coding
X	7559405	7562125	2721	+	WBGene00017243	F08C6.5	protein_coding
X	1495010	1497681	2672	-	WBGene00017296	F09E10.6	protein_coding
X	17372318	17374634	2317	-	WBGene00017340	F10D7.3	protein_coding
X	602160	604988	2829	+	WBGene00017422	F13C5.1	protein_coding
X	593960	596293	2334	+	WBGene00017423	F13C5.2	protein_coding
X	596228	599576	3349	-	WBGene00017424	F13C5.3	protein_coding
X	604872	608492	3621	-	WBGene00017426	F13C5.5	protein_coding
X	5829435	5832027	2593	+	WBGene00017427	acp-5	protein_coding
X	5831929	5834805	2877	-	WBGene00017429	F13D11.4	protein_coding
X	6929262	6932425	3164	-	WBGene00017448	F14B8.6	protein_coding
X	6921646	6924764	3119	-	WBGene00017449	otpl-3	protein_coding
X	5595787	5599330	3544	-	WBGene00017464	sulp-2	protein_coding
X	4350498	4352744	2247	+	WBGene00017470	F14H12.2	protein_coding
X	8457614	8459848	2235	+	WBGene00017514	F16F9.3	protein_coding
X	8459821	8463360	3540	-	WBGene00017515	F16F9.4	protein_coding
X	8580517	8583561	3045	+	WBGene00017570	F18E9.4	protein_coding
X	8595152	8597747	2596	-	WBGene00017573	F18E9.7	protein_coding
X	9262045	9264331	2287	-	WBGene00017582	F18G5.6	protein_coding
X	4194014	4196531	2518	-	WBGene00017628	F20B6.4	protein_coding
X	4204602	4207485	2884	-	WBGene00017632	F20B6.9	protein_coding
X	6533490	6536840	3351	-	WBGene00017691	ilys-5	protein_coding
X	6004153	6007096	2944	+	WBGene00017716	sups-1	protein_coding
X	7672993	7676305	3313	+	WBGene00017861	F27D9.2	protein_coding
X	7657542	7660986	3445	-	WBGene00017864	pcca-1	protein_coding
X	7667333	7670755	3423	-	WBGene00017865	F27D9.7	protein_coding
X	3206936	3209623	2688	-	WBGene00017893	F28B4.4	protein_coding
X	3789742	3792815	3074	-	WBGene00018026	F35A5.4	protein_coding
X	5369316	5372639	3324	-	WBGene00018038	F35C8.8	protein_coding
X	6698533	6700919	2387	+	WBGene00018172	F38B6.2	protein_coding
X	6693631	6695724	2094	+	WBGene00018173	F38B6.3	protein_coding
X	6695820	6698367	2548	-	WBGene00018176	F38B6.7	protein_coding
X	834778	837823	3046	+	WBGene00018212	F39H12.1	protein_coding
X	838144	841493	3350	-	WBGene00018214	F39H12.3	protein_coding
X	8372206	8374529	2324	+	WBGene00018227	nep-15	protein_coding
X	3243886	3245933	2048	-	WBGene00018238	F40F4.7	protein_coding
X	6881868	6885277	3410	-	WBGene00018280	F41C6.7	protein_coding
X	8382705	8384945	2241	-	WBGene00018282	F41D9.2	protein_coding
X	4793279	4796158	2880	+	WBGene00018375	F43C9.1	protein_coding
X	7985979	7988981	3003	+	WBGene00018465	F45E1.4	protein_coding
X	7548458	7551288	2831	+	WBGene00018484	F46C8.1	protein_coding
X	7537809	7540133	2325	-	WBGene00018486	glb-16	protein_coding
X	7551197	7554426	3230	-	WBGene00018487	F46C8.8	protein_coding
X	5788161	5790345	2185	+	WBGene00018515	F46G11.2	protein_coding
X	7265648	7267893	2246	+	WBGene00018518	F46H5.2	protein_coding
X	7258116	7260377	2262	-	WBGene00018523	lact-1	protein_coding
X	3778056	3781140	3085	-	WBGene00018538	marg-1	protein_coding
X	3893257	3895677	2421	-	WBGene00018571	F47F2.3	protein_coding
X	2375985	2379086	3102	+	WBGene00018578	F47G3.3	protein_coding
X	2147279	2150106	2828	-	WBGene00018591	npax-2	protein_coding
X	2173890	2176411	2522	-	WBGene00018593	F48B9.8	protein_coding
X	7490394	7493120	2727	-	WBGene00018603	F48E3.2	protein_coding
X	1962573	1966188	3616	+	WBGene00018689	F52D2.7	protein_coding
X	3089549	3092437	2889	+	WBGene00018701	pccb-1	protein_coding
X	16973226	16976143	2918	-	WBGene00018713	F52G3.5	protein_coding
X	2557967	2560079	2113	-	WBGene00018717	F52H2.5	protein_coding
X	8704306	8707252	2947	+	WBGene00018727	jbts-14	protein_coding
X	2108982	2111441	2460	+	WBGene00018735	F53B1.2	protein_coding
X	2114618	2118262	3645	-	WBGene00018738	swip-10	protein_coding
X	4712279	4715080	2802	+	WBGene00018878	glit-1	protein_coding
X	8348534	8351084	2551	-	WBGene00018886	npr-28	protein_coding
X	1372012	1374713	2702	+	WBGene00018939	fbxa-190	protein_coding
X	1365474	1367516	2043	-	WBGene00018943	dgn-2	protein_coding
X	1391800	1393991	2192	-	WBGene00018946	F56C3.9	protein_coding
X	872603	875948	3346	+	WBGene00018984	F56F10.1	protein_coding
X	859615	862461	2847	+	WBGene00018985	F56F10.2	protein_coding
X	549355	551392	2038	-	WBGene00019014	F57C12.2	protein_coding
X	2578211	2580574	2364	-	WBGene00019143	H01M10.1	protein_coding
X	6784411	6787305	2895	+	WBGene00019225	bgal-2	protein_coding
X	6787256	6789548	2293	-	WBGene00019227	sgca-1	protein_coding
X	5216363	5219095	2733	+	WBGene00019249	hrpa-2	protein_coding
X	8605339	8607753	2415	+	WBGene00019265	H35N09.1	protein_coding
X	4707176	4709812	2637	+	WBGene00019344	dhhc-10	protein_coding
X	4673706	4677350	3645	+	WBGene00019345	tmem-135	protein_coding
X	4687763	4691198	3436	-	WBGene00019346	K02G10.5	protein_coding
X	7296010	7298752	2743	-	WBGene00019352	K03A1.4	protein_coding
X	1066606	1069129	2524	-	WBGene00019364	mksr-1	protein_coding
X	8104298	8107595	3298	+	WBGene00019491	K07E3.2	protein_coding
X	8080868	8084018	3151	-	WBGene00019492	K07E3.4	protein_coding
X	16551167	16553887	2721	-	WBGene00019519	K08B5.2	protein_coding
X	3298882	3301637	2756	+	WBGene00019547	K09C4.1	protein_coding
X	3289483	3292477	2995	+	WBGene00019549	K09C4.4	protein_coding
X	3282631	3285721	3091	+	WBGene00019550	K09C4.5	protein_coding
X	3272880	3275613	2734	+	WBGene00019552	K09C4.7	protein_coding
X	17112932	17115189	2258	-	WBGene00019577	lido-6	protein_coding
X	17131348	17134527	3180	-	WBGene00019578	K09E3.7	protein_coding
X	7733334	7736271	2938	-	WBGene00019584	set-12	protein_coding
X	3103235	3106479	3245	-	WBGene00019611	K10B3.5	protein_coding
X	6430695	6433788	3094	-	WBGene00019618	K10C2.2	protein_coding
X	6444185	6446664	2480	-	WBGene00019619	asp-14	protein_coding
X	6446746	6448916	2171	-	WBGene00019620	fah-1	protein_coding
X	8763907	8766280	2374	+	WBGene00019727	zig-12	protein_coding
X	8748434	8750941	2508	-	WBGene00019730	asns-2	protein_coding
X	308762	311311	2550	-	WBGene00019734	nlp-64	protein_coding
X	6800053	6803702	3650	+	WBGene00019749	M03A8.3	protein_coding
X	8257998	8261175	3178	-	WBGene00019782	M60.7	protein_coding
X	7556788	7559085	2298	-	WBGene00019803	PDB1.1	protein_coding
X	4005314	4007715	2402	+	WBGene00019828	R02E12.4	protein_coding
X	6729998	6733301	3304	-	WBGene00019843	R03E9.2	protein_coding
X	377174	380605	3432	-	WBGene00019863	R04A9.3	protein_coding
X	397559	400709	3151	+	WBGene00019865	R04A9.6	protein_coding
X	2471540	2473718	2179	-	WBGene00019867	R04B3.2	protein_coding
X	2473758	2475973	2216	-	WBGene00019868	R04B3.3	protein_coding
X	5949529	5953174	3646	-	WBGene00019938	R07E4.5	protein_coding
X	4818593	4821715	3123	+	WBGene00019959	R08E3.3	protein_coding
X	8294625	8296688	2064	+	WBGene00019987	R09F10.3	protein_coding
X	3650614	3653679	3066	+	WBGene00020011	R11G1.2	protein_coding
X	297234	299287	2054	+	WBGene00020083	R57.2	protein_coding
X	8495305	8498146	2842	+	WBGene00020137	T01B10.5	protein_coding
X	16780122	16783209	3088	-	WBGene00020144	T01C8.3	protein_coding
X	2694923	2698273	3351	+	WBGene00020158	T02C5.1	protein_coding
X	5174369	5177511	3143	+	WBGene00020196	T03G11.3	protein_coding
X	5165395	5168783	3389	+	WBGene00020197	mans-3	protein_coding
X	772476	775371	2896	+	WBGene00020215	T04G9.4	protein_coding
X	4894055	4896631	2577	+	WBGene00020321	T07F12.1	protein_coding
X	4890245	4892332	2088	+	WBGene00020322	T07F12.2	protein_coding
X	4885951	4889575	3625	+	WBGene00020323	arrd-23	protein_coding
X	6311691	6314212	2522	+	WBGene00020420	T10E10.3	protein_coding
X	2294750	2298193	3444	+	WBGene00020426	T10H10.2	protein_coding
X	2283998	2287192	3195	-	WBGene00020427	sav-1	protein_coding
X	6191605	6194241	2637	-	WBGene00020485	ceh-54	protein_coding
X	1188433	1191678	3246	-	WBGene00020491	T13G4.4	protein_coding
X	2237911	2240255	2345	+	WBGene00020507	vha-15	protein_coding
X	2234324	2236706	2383	+	WBGene00020508	T14F9.2	protein_coding
X	2688990	2692022	3033	+	WBGene00020510	T14G11.1	protein_coding
X	656184	658516	2333	+	WBGene00020571	lpr-7	protein_coding
X	658477	661777	3301	-	WBGene00020572	rund-1	protein_coding
X	16866046	16869031	2986	-	WBGene00020633	aakg-2	protein_coding
X	16878077	16880526	2450	-	WBGene00020634	acs-9	protein_coding
X	3926076	3929574	3499	+	WBGene00020665	T22B2.1	protein_coding
X	3920401	3923877	3477	+	WBGene00020666	T22B2.2	protein_coding
X	3917313	3919448	2136	+	WBGene00020667	T22B2.3	protein_coding
X	3908144	3911380	3237	-	WBGene00020669	T22B2.5	protein_coding
X	5647373	5650218	2846	+	WBGene00020672	T22B7.3	protein_coding
X	5638576	5641415	2840	-	WBGene00020673	T22B7.4	protein_coding
X	5651865	5654074	2210	-	WBGene00020674	T22B7.7	protein_coding
X	6385485	6387863	2379	+	WBGene00020691	igdb-3	protein_coding
X	6413738	6416407	2670	-	WBGene00020692	T22E5.6	protein_coding
X	17136000	17138110	2111	-	WBGene00020725	cnp-3	protein_coding
X	17147502	17149927	2426	-	WBGene00020726	T23C6.4	protein_coding
X	17155088	17157968	2881	-	WBGene00020727	npr-21	protein_coding
X	16519817	16522295	2479	+	WBGene00020793	T25D1.1	protein_coding
X	16515565	16519175	3611	+	WBGene00020794	T25D1.2	protein_coding
X	17231648	17234791	3144	+	WBGene00020811	T25G12.3	protein_coding
X	17215018	17217105	2088	-	WBGene00020812	acdh-7	protein_coding
X	3597276	3600457	3182	-	WBGene00020847	cgr-1	protein_coding
X	5692399	5694426	2028	+	WBGene00020918	W01C8.1	protein_coding
X	5694471	5697308	2838	-	WBGene00020921	W01C8.5	protein_coding
X	6263648	6266913	3266	+	WBGene00021051	W05H9.4	protein_coding
X	5849100	5851971	2872	+	WBGene00021059	atat-2	protein_coding
X	680461	682791	2331	-	WBGene00021185	Y9C12A.1	protein_coding
X	5244337	5246922	2586	+	WBGene00021323	Y34B4A.7	protein_coding
X	5249903	5252787	2885	+	WBGene00021326	Y34B4A.10	protein_coding
X	2982015	2984126	2112	+	WBGene00021526	nspg-5	protein_coding
X	2946667	2949026	2360	+	WBGene00021529	Y41G9A.5	protein_coding
X	3000512	3003803	3292	-	WBGene00021530	Y41G9A.6	protein_coding
X	3009490	3011705	2216	+	WBGene00021656	Y48D7A.1	protein_coding
X	106971	109029	2059	-	WBGene00022207	elk-2	protein_coding
X	119663	122279	2617	+	WBGene00022216	fbxa-16	protein_coding
X	114700	116814	2115	+	WBGene00022217	fbxa-221	protein_coding
X	209108	211241	2134	-	WBGene00022223	Y73B3B.1	protein_coding
X	2051824	2054048	2225	+	WBGene00022411	Y102A11A.1	protein_coding
X	2031868	2035272	3405	-	WBGene00022416	Y102A11A.6	protein_coding
X	2035929	2039458	3530	-	WBGene00022417	Y102A11A.7	protein_coding
X	877239	879884	2646	+	WBGene00022502	ZC13.1	protein_coding
X	880667	883094	2428	+	WBGene00022503	ZC13.2	protein_coding
X	1910943	1913357	2415	-	WBGene00022508	ZC53.1	protein_coding
X	1917469	1919755	2287	+	WBGene00022512	dot-1.5	protein_coding
X	5021285	5024258	2974	+	WBGene00022612	ZC449.2	protein_coding
X	5017891	5021098	3208	+	WBGene00022613	sek-3	protein_coding
X	5035030	5037773	2744	-	WBGene00022615	ZC449.5	protein_coding
X	7790178	7793563	3386	-	WBGene00022668	ZK154.6	protein_coding
X	1398824	1401359	2536	-	WBGene00022731	ZK402.5	protein_coding
X	4163691	4166303	2613	+	WBGene00022744	ZK470.1	protein_coding
X	3376834	3379248	2415	-	WBGene00022769	sorf-1	protein_coding
X	3382868	3385462	2595	-	WBGene00022770	acp-1	protein_coding
X	8784534	8787175	2642	+	WBGene00022810	ZK721.3	protein_coding
X	3427358	3430120	2763	-	WBGene00022823	ZK813.4	protein_coding
X	3448689	3451222	2534	-	WBGene00022824	ZK813.5	protein_coding
X	15731968	15735365	3398	+	WBGene00023498	lin-15A	protein_coding
X	14318206	14320398	2193	-	WBGene00023500	C11H1.9	protein_coding
X	3304368	3306939	2572	+	WBGene00043980	F11D5.7	protein_coding
X	6559466	6562428	2963	-	WBGene00043981	T14E8.4	protein_coding
X	7903276	7905774	2499	+	WBGene00043983	C39D10.11	protein_coding
X	11707883	11710343	2461	-	WBGene00043985	C44C10.11	protein_coding
X	4330076	4332405	2330	-	WBGene00044004	C24A8.6	protein_coding
X	4107455	4110535	3081	+	WBGene00044021	R02E4.2	protein_coding
X	12217243	12219312	2070	+	WBGene00044132	C23H4.8	protein_coding
X	14516860	14519159	2300	+	WBGene00044134	D1025.10	protein_coding
X	11313385	11315572	2188	-	WBGene00044135	F08G12.11	protein_coding
X	14875968	14878855	2888	+	WBGene00044138	sssh-1	protein_coding
X	15503124	15505452	2329	+	WBGene00044142	H13N06.7	protein_coding
X	391360	394892	3533	-	WBGene00044281	R04A9.7	protein_coding
X	7211705	7213956	2252	+	WBGene00044283	spp-22	protein_coding
X	8740685	8742996	2312	-	WBGene00044313	M02D8.7	protein_coding
X	3380467	3382896	2430	+	WBGene00044355	ZK563.7	protein_coding
X	899425	902612	3188	-	WBGene00044557	ZC13.10	protein_coding
X	1860722	1863543	2822	+	WBGene00044563	T26C11.8	protein_coding
X	3424816	3427372	2557	+	WBGene00044564	ZK813.6	protein_coding
X	4644308	4647204	2897	-	WBGene00044567	C46C11.4	protein_coding
X	5184231	5186686	2456	+	WBGene00044584	T03G11.9	protein_coding
X	5493332	5496050	2719	+	WBGene00044623	bus-8	protein_coding
X	5168725	5171185	2461	-	WBGene00044732	T03G11.10	protein_coding
X	17334052	17336548	2497	+	WBGene00044770	C53C11.5	protein_coding
X	17649680	17652077	2398	+	WBGene00044771	tmem-218	protein_coding
X	11907267	11910145	2879	-	WBGene00045252	Y62H9A.15	protein_coding
X	360779	362965	2187	+	WBGene00045270	C04E7.5	protein_coding
X	14413460	14415741	2282	-	WBGene00045291	F23D12.10	protein_coding
X	12989344	12991385	2042	+	WBGene00045495	F11C1.7	protein_coding
X	13055860	13058381	2522	+	WBGene00045497	K03A11.6	protein_coding
X	7398884	7400954	2071	+	WBGene00050957	C10A4.10	protein_coding
X	13257806	13261065	3260	+	WBGene00164968	K08H2.10	protein_coding
X	3416617	3419184	2568	-	WBGene00195081	C04F6.7	protein_coding
X	1801456	1805087	3632	+	WBGene00206378	C14E2.11	protein_coding
X	7395939	7398035	2097	-	WBGene00206485	C10A4.13	protein_coding
X	16247684	16250779	3096	-	WBGene00219300	W10G6.6	protein_coding
X	4167450	4169807	2358	+	WBGene00219362	ZK470.14	protein_coding
X	8120314	8123368	3055	-	WBGene00219375	C02B8.12	protein_coding
X	1978014	1980942	2929	+	WBGene00219451	F52D2.12	protein_coding
X	7269520	7272068	2549	-	WBGene00303398	F46H5.11	protein_coding
X	11918294	11920445	2152	+	WBGene00304791	Y62H9A.16	protein_coding
X	1148787	1151507	2721	+	WBGene00304820	R193.6	protein_coding
X	2996306	2999752	3447	-	WBGene00304825	Y41G9A.17	protein_coding
IV	9599178	9601695	2518	-	WBGene00000002	aat-1	protein_coding
IV	6272529	6275721	3193	-	WBGene00000005	aat-4	protein_coding
IV	3862033	3865044	3012	-	WBGene00000009	aat-8	protein_coding
IV	11022603	11025870	3268	+	WBGene00000109	alh-3	protein_coding
IV	11131279	11133805	2527	+	WBGene00000181	ard-1	protein_coding
IV	16947120	16949564	2445	+	WBGene00000184	arf-6	protein_coding
IV	520214	523809	3596	-	WBGene00000213	asm-3	protein_coding
IV	17269342	17272181	2840	+	WBGene00000224	atgp-1	protein_coding
IV	5661141	5664425	3285	-	WBGene00000247	bec-1	protein_coding
IV	8987266	8990444	3179	+	WBGene00000266	bre-1	protein_coding
IV	3506328	3509527	3200	-	WBGene00000424	ced-10	protein_coding
IV	7953500	7955949	2450	-	WBGene00000442	ceh-19	protein_coding
IV	9477522	9481037	3516	-	WBGene00000563	cng-3	protein_coding
IV	7036957	7039580	2624	-	WBGene00000585	cogc-2	protein_coding
IV	1817392	1820253	2862	-	WBGene00000683	col-109	protein_coding
IV	4655791	4657974	2184	-	WBGene00000685	col-111	protein_coding
IV	7988685	7991428	2744	+	WBGene00000689	col-115	protein_coding
IV	15129655	15131797	2143	-	WBGene00000708	col-135	protein_coding
IV	14793104	14796324	3221	-	WBGene00000763	coq-3	protein_coding
[truncated: 3,042 more rows]

## Sheet: Quantile_4
Chromosome	start	end	Length	strand	Gene_ID	Gene_Name	gene_biotype
V	11466842	11470663	3822	-	WBGene00000007	aat-6	protein_coding
V	323777	330725	6949	-	WBGene00000022	abt-4	protein_coding
V	2608652	2615262	6611	+	WBGene00000056	acr-17	protein_coding
V	15551157	15559147	7991	-	WBGene00000057	acr-18	protein_coding
V	3651656	3659572	7917	-	WBGene00000062	acr-23	protein_coding
V	5976024	5981478	5455	+	WBGene00000069	acy-2	protein_coding
V	5624727	5630892	6166	-	WBGene00000071	acy-4	protein_coding
V	12009540	12013406	3867	-	WBGene00000073	add-2	protein_coding
V	10248905	10252845	3941	+	WBGene00000102	akt-1	protein_coding
V	20898840	20903714	4875	-	WBGene00000139	amx-3	protein_coding
V	11675938	11685274	9337	+	WBGene00000146	ape-1	protein_coding
V	3210196	3223221	13026	+	WBGene00000168	apx-1	protein_coding
V	9634849	9645595	10747	-	WBGene00000226	atl-1	protein_coding
V	12478411	12484449	6039	+	WBGene00000228	atn-1	protein_coding
V	13498780	13511718	12939	-	WBGene00000233	avr-15	protein_coding
V	14453302	14456984	3683	-	WBGene00000257	bmk-1	protein_coding
V	1567076	1585532	18457	+	WBGene00000387	cdc-25.2	protein_coding
V	10671918	10675769	3852	+	WBGene00000445	ceh-22	protein_coding
V	5315496	5319577	4082	-	WBGene00000455	ceh-34	protein_coding
V	5538800	5545789	6990	+	WBGene00000477	cft-1	protein_coding
V	118202	122789	4588	-	WBGene00000480	cgp-1	protein_coding
V	7961210	7969207	7998	-	WBGene00000488	che-7	protein_coding
V	12144244	12150707	6464	-	WBGene00000490	che-11	protein_coding
V	10299472	10307383	7912	-	WBGene00000491	che-12	protein_coding
V	19908086	19916023	7938	-	WBGene00000499	chk-2	protein_coding
V	12736703	12741205	4503	+	WBGene00000521	cky-1	protein_coding
V	15025731	15031473	5743	-	WBGene00000562	cng-1	protein_coding
V	13198231	13202177	3947	-	WBGene00000732	col-159	protein_coding
V	17861368	17870651	9284	-	WBGene00000813	csn-1	protein_coding
V	177417	185172	7756	+	WBGene00000838	cul-3	protein_coding
V	5799673	5805666	5994	+	WBGene00000893	cyn-17	protein_coding
V	11718102	11726071	7970	-	WBGene00000907	daf-11	protein_coding
V	11415272	11421705	6434	-	WBGene00000955	des-2	protein_coding
V	1765311	1771734	6424	-	WBGene00000976	dhs-13	protein_coding
V	6026329	6034814	8486	-	WBGene00000980	dhs-17	protein_coding
V	19934767	19946629	11863	-	WBGene00000987	dhs-24	protein_coding
V	20729948	20744346	14399	-	WBGene00001043	dnj-25	protein_coding
V	9608556	9614940	6385	+	WBGene00001053	dop-2	protein_coding
V	15471329	15476124	4796	+	WBGene00001054	dpf-1	protein_coding
V	17936282	17949193	12912	-	WBGene00001080	dpy-21	protein_coding
V	6533614	6546500	12887	-	WBGene00001089	dre-1	protein_coding
V	15357664	15361512	3849	-	WBGene00001150	ech-1.1	protein_coding
V	16958590	16965675	7086	-	WBGene00001161	efl-1	protein_coding
V	1289373	1299332	9960	-	WBGene00001171	egl-2	protein_coding
V	10169177	10173753	4577	-	WBGene00001172	egl-3	protein_coding
V	20818	43704	22887	+	WBGene00001177	egl-8	protein_coding
V	10468517	10476915	8399	+	WBGene00001178	egl-9	protein_coding
V	12453290	12463008	9719	-	WBGene00001179	egl-10	protein_coding
V	9899578	9907647	8070	+	WBGene00001211	egl-47	protein_coding
V	20764971	20770161	5191	-	WBGene00001248	elp-1	protein_coding
V	18860285	18894974	34690	-	WBGene00001258	emb-4	protein_coding
V	6003601	6016087	12487	+	WBGene00001345	fos-1	protein_coding
V	6131400	6143970	12571	+	WBGene00001374	exp-2	protein_coding
V	20425301	20431297	5997	+	WBGene00001406	fce-2	protein_coding
V	13019061	13033401	14341	+	WBGene00001475	fmi-1	protein_coding
V	899304	903665	4362	-	WBGene00001480	fmo-5	protein_coding
V	20075916	20087735	11820	-	WBGene00001485	fre-1	protein_coding
V	12302484	12306974	4491	+	WBGene00001493	frm-7	protein_coding
V	13463207	13467131	3925	+	WBGene00001496	frm-10	protein_coding
V	14564819	14579719	14901	-	WBGene00001519	gar-3	protein_coding
V	8947799	8956296	8498	+	WBGene00001526	gck-1	protein_coding
V	10308291	10314053	5763	-	WBGene00001533	gcy-6	protein_coding
V	8387356	8392324	4969	+	WBGene00001534	gcy-7	protein_coding
V	12363754	12369537	5784	-	WBGene00001539	gcy-13	protein_coding
V	14863134	14868281	5148	-	WBGene00001540	gcy-14	protein_coding
V	16248583	16253787	5205	-	WBGene00001545	gcy-20	protein_coding
V	20820118	20825062	4945	-	WBGene00001547	gcy-22	protein_coding
V	11995805	12001797	5993	-	WBGene00001553	gcy-33	protein_coding
V	7226376	7230848	4473	-	WBGene00001563	gei-6	protein_coding
V	724332	728004	3673	-	WBGene00001564	icl-1	protein_coding
V	1427653	1432137	4485	-	WBGene00001578	ges-1	protein_coding
V	6392537	6399931	7395	-	WBGene00001581	gfi-1	protein_coding
V	5449275	5453715	4441	-	WBGene00001593	glc-3	protein_coding
V	8716495	8720516	4022	+	WBGene00001616	glr-5	protein_coding
V	19881372	19895350	13979	-	WBGene00001629	gly-4	protein_coding
V	1815851	1821323	5473	-	WBGene00001632	gly-7	protein_coding
V	12645477	12649313	3837	-	WBGene00001671	gpa-9	protein_coding
V	20609794	20613929	4136	+	WBGene00001691	grd-2	protein_coding
V	20356772	20365773	9002	+	WBGene00001700	grd-11	protein_coding
V	10682422	10686537	4116	+	WBGene00001747	gsp-1	protein_coding
V	15760455	15766172	5718	-	WBGene00001813	haf-3	protein_coding
V	14773258	14777697	4440	+	WBGene00001817	haf-7	protein_coding
V	6594194	6599208	5015	+	WBGene00001829	hcp-1	protein_coding
V	9645859	9650211	4353	+	WBGene00001830	hcp-2	protein_coding
V	9697015	9702035	5021	+	WBGene00001842	her-1	protein_coding
V	20780407	20785260	4854	+	WBGene00001851	hif-1	protein_coding
V	11845871	11852166	6296	+	WBGene00001978	hmp-1	protein_coding
V	14621135	14629472	8338	+	WBGene00001986	hot-1	protein_coding
V	19174759	19187911	13153	+	WBGene00001987	hot-2	protein_coding
V	9386175	9400063	13889	+	WBGene00002036	hum-2	protein_coding
V	7805064	7814656	9593	+	WBGene00002078	xpo-1	protein_coding
V	12487234	12493269	6036	+	WBGene00002133	inx-11	protein_coding
V	6606433	6611158	4726	-	WBGene00002148	gon-14	protein_coding
V	5576472	5581412	4941	-	WBGene00002215	klc-2	protein_coding
V	12032258	12040873	8616	-	WBGene00002241	kup-1	protein_coding
V	10011923	10028168	16246	+	WBGene00002263	lea-1	protein_coding
V	7973078	7977776	4699	-	WBGene00002632	let-413	protein_coding
V	5826833	5832831	5999	+	WBGene00002637	let-418	protein_coding
V	12649925	12658714	8790	+	WBGene00003011	lin-25	protein_coding
V	3704988	3712796	7809	+	WBGene00003025	lin-40	protein_coding
V	13098903	13120220	21318	-	WBGene00003143	max-1	protein_coding
V	6956537	6966425	9889	+	WBGene00003165	mec-1	protein_coding
V	9907615	9915121	7507	-	WBGene00003173	mec-9	protein_coding
V	13433050	13437545	4496	-	WBGene00003222	mes-4	protein_coding
V	7827217	7842390	15174	+	WBGene00003242	mig-6	protein_coding
V	5056378	5064811	8434	-	WBGene00003374	mlk-1	protein_coding
V	8909704	8914040	4337	-	WBGene00003386	mod-1	protein_coding
V	19674843	19693049	18207	+	WBGene00003413	mrp-7	protein_coding
V	3743576	3749403	5828	+	WBGene00003479	mtm-9	protein_coding
V	12226817	12234343	7527	-	WBGene00003515	myo-3	protein_coding
V	4836027	4840013	3987	-	WBGene00003528	nas-9	protein_coding
V	894909	899187	4279	-	WBGene00003550	nas-32	protein_coding
V	20105633	20120673	15041	-	WBGene00003566	ncx-1	protein_coding
V	5303689	5311270	7582	+	WBGene00003567	ncx-2	protein_coding
V	10486361	10490098	3738	-	WBGene00003570	ncx-5	protein_coding
V	4991342	4995255	3914	-	WBGene00003574	ncx-9	protein_coding
V	4851438	4857293	5856	+	WBGene00003591	nex-4	protein_coding
V	2192485	2196827	4343	+	WBGene00003612	nhr-13	protein_coding
V	312721	323650	10930	+	WBGene00003614	nhr-15	protein_coding
V	5505253	5509956	4704	+	WBGene00003637	nhr-47	protein_coding
V	18839304	18845443	6140	+	WBGene00003655	nhr-65	protein_coding
V	19207676	19211895	4220	-	WBGene00003669	nhr-79	protein_coding
V	2061106	2066850	5745	-	WBGene00003676	nhr-86	protein_coding
V	19076604	19082641	6038	-	WBGene00003685	nhr-95	protein_coding
V	3880798	3886204	5407	-	WBGene00003714	nhr-124	protein_coding
V	16259984	16263953	3970	+	WBGene00003717	nhr-127	protein_coding
V	7540890	7545523	4634	-	WBGene00003731	nhx-3	protein_coding
V	12910107	12917221	7115	+	WBGene00003738	nid-1	protein_coding
V	15006341	15011660	5320	-	WBGene00003775	nmr-2	protein_coding
V	7075787	7081580	5794	+	WBGene00003786	npa-1	protein_coding
V	20829811	20837619	7809	+	WBGene00003830	num-1	protein_coding
V	10764366	10768590	4225	+	WBGene00003838	ocr-1	protein_coding
V	7103547	7114439	10893	+	WBGene00003849	odr-2	protein_coding
V	14112033	14145367	33335	-	WBGene00003916	par-1	protein_coding
V	18098687	18106405	7719	+	WBGene00003919	par-4	protein_coding
V	5960200	5963882	3683	-	WBGene00003954	pcm-1	protein_coding
V	19822734	19831011	8278	-	WBGene00003959	pcp-4	protein_coding
V	17755892	17764751	8860	+	WBGene00004003	pgp-9	protein_coding
V	20753052	20760317	7266	+	WBGene00004013	pha-4	protein_coding
V	16833165	16839142	5978	+	WBGene00004026	phy-3	protein_coding
V	12014383	12032160	17778	-	WBGene00004032	pkc-1	protein_coding
V	15192572	15197624	5053	+	WBGene00004037	plc-2	protein_coding
V	1276415	1285707	9293	-	WBGene00004053	tank-1	protein_coding
V	14646739	14653493	6755	+	WBGene00004060	pmp-3	protein_coding
V	11566801	11570601	3801	-	WBGene00004064	pms-2	protein_coding
V	5669604	5676111	6508	-	WBGene00004104	pqn-13	protein_coding
V	2781939	2807860	25922	-	WBGene00004130	ketn-1	protein_coding
V	12924428	12928177	3750	+	WBGene00004150	pqn-67	protein_coding
V	4715388	4720093	4706	-	WBGene00004195	prx-6	protein_coding
V	20239182	20249488	10307	-	WBGene00004203	swsn-1	protein_coding
V	5943467	5951417	7951	+	WBGene00004206	pst-1	protein_coding
V	9250232	9254328	4097	+	WBGene00004211	ptd-2	protein_coding
V	9177949	9181719	3771	-	WBGene00004216	ptr-1	protein_coding
V	1165711	1174969	9259	+	WBGene00004230	ptr-16	protein_coding
V	18919221	18931379	12159	-	WBGene00004236	ptr-22	protein_coding
V	8494889	8502442	7554	+	WBGene00004256	pxn-1	protein_coding
V	11817783	11822529	4747	-	WBGene00004258	pyc-1	protein_coding
V	12245646	12251246	5601	+	WBGene00004296	rad-50	protein_coding
V	9987916	9991642	3727	-	WBGene00004323	rde-1	protein_coding
V	14829177	14847413	18237	-	WBGene00004336	ret-1	protein_coding
V	10261131	10270314	9184	-	WBGene00004364	ric-4	protein_coding
V	6208885	6217664	8780	+	WBGene00004373	rme-1	protein_coding
V	8228276	8238409	10134	-	WBGene00004395	rol-3	protein_coding
V	8805399	8819955	14557	-	WBGene00004457	rpm-1	protein_coding
V	12763945	12767933	3989	+	WBGene00004738	scc-3	protein_coding
V	6633225	6639665	6441	+	WBGene00004740	scd-2	protein_coding
V	15039148	15048207	9060	-	WBGene00004747	sdc-3	protein_coding
V	20091263	20105685	14423	+	WBGene00004754	sec-23	protein_coding
V	12973261	12987161	13901	-	WBGene00004793	shw-3	protein_coding
V	5119970	5126916	6947	+	WBGene00004795	sid-1	protein_coding
V	11645481	11650090	4610	+	WBGene00004806	skp-1	protein_coding
V	18492261	18508212	15952	+	WBGene00004830	slo-1	protein_coding
V	11899449	11916623	17175	+	WBGene00004855	sma-1	protein_coding
V	1358178	1371014	12837	-	WBGene00004923	snt-3	protein_coding
V	1393112	1411559	18448	-	WBGene00004925	snt-5	protein_coding
V	4642952	4646931	3980	+	WBGene00004928	soc-1	protein_coding
V	4516944	4549291	32348	-	WBGene00004947	sos-1	protein_coding
V	950306	964789	14484	-	WBGene00005024	sqv-6	protein_coding
V	4865664	4870392	4729	+	WBGene00005110	srd-32	protein_coding
V	728301	734311	6011	+	WBGene00005228	srh-2	protein_coding
V	19965700	19972559	6860	+	WBGene00005387	srh-171	protein_coding
V	15407228	15411380	4153	+	WBGene00005463	srh-257	protein_coding
V	16183218	16186952	3735	+	WBGene00005482	srh-277	protein_coding
V	17824910	17828850	3941	+	WBGene00005505	srh-301	protein_coding
V	8179126	8183442	4317	+	WBGene00005648	srp-7	protein_coding
V	13049730	13053735	4006	-	WBGene00005652	srr-1	protein_coding
V	18426580	18430537	3958	+	WBGene00005830	srw-83	protein_coding
V	1711209	1715399	4191	+	WBGene00005847	srw-100	protein_coding
V	3236875	3240611	3737	+	WBGene00006084	str-16	protein_coding
V	19225521	19251083	25563	-	WBGene00006140	str-81	protein_coding
V	8103260	8107022	3763	+	WBGene00006149	str-90	protein_coding
V	765032	772585	7554	+	WBGene00006266	str-238	protein_coding
V	2517530	2521771	4242	+	WBGene00006283	str-257	protein_coding
V	8786545	8792781	6237	+	WBGene00006342	sup-37	protein_coding
V	246608	251752	5145	-	WBGene00006419	oac-39	protein_coding
V	6120909	6202632	81724	-	WBGene00006436	ttn-1	protein_coding
V	6257390	6267287	9898	-	WBGene00006437	mrck-1	protein_coding
V	8792760	8801028	8269	-	WBGene00006467	magu-2	protein_coding
V	11463013	11466770	3758	+	WBGene00006486	zipt-16	protein_coding
V	9323085	9327213	4129	+	WBGene00006499	tag-153	protein_coding
V	4958603	4963102	4500	-	WBGene00006523	tam-1	protein_coding
V	8334660	8340756	6097	+	WBGene00006582	tmd-2	protein_coding
V	11709769	11715903	6135	-	WBGene00006609	tre-3	protein_coding
V	156819	166870	10052	+	WBGene00006648	ttb-1	protein_coding
V	20053719	20064176	10458	-	WBGene00006652	ttx-1	protein_coding
V	6552340	6560256	7917	+	WBGene00006665	twk-10	protein_coding
V	7028258	7036575	8318	-	WBGene00006666	twk-11	protein_coding
V	12320170	12337994	17825	-	WBGene00006668	twk-13	protein_coding
V	12387039	12395706	8668	-	WBGene00006669	twk-14	protein_coding
V	13796641	13800577	3937	+	WBGene00006684	twk-32	protein_coding
V	17710042	17714377	4336	-	WBGene00006685	twk-33	protein_coding
V	15704960	15709592	4633	+	WBGene00006686	twk-34	protein_coding
V	17726791	17732616	5826	-	WBGene00006692	twk-42	protein_coding
V	13346278	13356168	9891	+	WBGene00006693	twk-43	protein_coding
V	19060173	19067034	6862	+	WBGene00006696	twk-46	protein_coding
V	982706	996914	14209	+	WBGene00006770	unc-34	protein_coding
V	9966380	9976238	9859	-	WBGene00006777	unc-41	protein_coding
V	9764534	9769391	4858	-	WBGene00006778	unc-42	protein_coding
V	19995986	20004485	8500	-	WBGene00006786	unc-51	protein_coding
V	1475086	1479576	4491	+	WBGene00006794	unc-60	protein_coding
V	4497461	4511449	13989	+	WBGene00006796	unc-62	protein_coding
V	6901681	6929038	27358	-	WBGene00006801	unc-68	protein_coding
V	6881338	6891839	10502	+	WBGene00006803	unc-70	protein_coding
V	15071760	15080152	8393	+	WBGene00006808	unc-76	protein_coding
V	20879601	20898948	19348	+	WBGene00006812	unc-80	protein_coding
V	6465065	6487883	22819	+	WBGene00006815	unc-83	protein_coding
V	14691855	14696654	4800	-	WBGene00006836	unc-112	protein_coding
V	12213327	12225934	12608	+	WBGene00006874	vab-8	protein_coding
V	10566402	10576419	10018	-	WBGene00006934	vps-54	protein_coding
V	18852704	18859221	6518	-	WBGene00006945	wars-1	protein_coding
V	20250806	20267247	16442	-	WBGene00007017	mdt-17	protein_coding
V	9209463	9213654	4192	-	WBGene00007023	mdt-27	protein_coding
V	18055969	18060708	4740	+	WBGene00007062	ebp-3	protein_coding
V	10388527	10393505	4979	+	WBGene00007071	AC3.5	protein_coding
[truncated: 4,715 more rows]
