# Supplementary material
Source: Research Square preprint supplement (doi:10.21203/rs.3.rs-7966420/v1)
Supplement: Supplementary file 2 [file 22f52e6b3d015a5199fbcd4e.xlsx]

## Sheet: N2.30minHS.N2.Ctrl
gene	events	dPSI	pval	event	Direction	gene_name
WBGene00000144	A5:V:10426255-10426313:10426255-10426321:-	0.12365	0.048951	A5	up	apc-10
WBGene00000170	SE:II:9259384-9259590:9259617-9259671:-	-0.214086	0.001998	SE	down	aqp-2
WBGene00000223	A3:III:4492768-4492810:4492759-4492810:-	-0.0443348	0.0949051	A3	down	atf-7
WBGene00303035	A3:III:4492768-4492810:4492759-4492810:-	-0.0443348	0.0949051	A3	down	C07G2.5
WBGene00000223	AF:III:4494092-4494187:4494450:4494092-4498491:4498559:-	0.109293	0.0832501	AF	up	atf-7
WBGene00303035	AF:III:4494092-4494187:4494450:4494092-4498491:4498559:-	0.109293	0.0832501	AF	up	C07G2.5
WBGene00000223	RI:III:4492652:4492759-4492810:4493101:-	-0.185223	0.0374625	RI	down	atf-7
WBGene00303035	RI:III:4492652:4492759-4492810:4493101:-	-0.185223	0.0374625	RI	down	C07G2.5
WBGene00000223	RI:III:4492652:4492768-4492810:4493101:-	-0.0714525	0.0599401	RI	down	atf-7
WBGene00303035	RI:III:4492652:4492768-4492810:4493101:-	-0.0714525	0.0599401	RI	down	C07G2.5
WBGene00000228	MX:V:12480610-12480728:12480888-12481284:12480610-12481114:12481196-12481284:+	-0.0773834	0.0474525	MX	down	atn-1
WBGene00000271	A3:II:7307003-7307043:7307003-7307058:+	0.0666721	0.0624376	A3	up	brf-1
WBGene00000393	AF:X:6502839-6502894:6503027:6502839-6504434:6504613:-	0.24796	0.033966	AF	up	cdf-1
WBGene00000459	A3:II:6952464-6952513:6952464-6952522:+	-0.0702962	0.0725941	A3	down	ceh-38
WBGene00000459	A3:II:6953059-6953182:6953059-6953209:+	-0.0919972	0.0725941	A3	down	ceh-38
WBGene00000459	A3:II:6953668-6953783:6953668-6953789:+	-0.0627182	0.0725941	A3	down	ceh-38
WBGene00000523	SE:X:7431829-7431882:7432022-7432846:+	0.347705	0.0939061	SE	up	clc-2
WBGene00000762	MX:III:6937474-6937600:6937733-6938909:6937474-6938412:6938545-6938909:+	-0.0995199	0.0629371	MX	down	coq-2
WBGene00000818	A3:IV:13302898-13302937:13302898-13302952:+	-0.0829101	0.0214785	A3	down	csn-6
WBGene00000876	SE:V:11992148-11992608:11992658-11992918:-	0.0539217	0.0739261	SE	up	cyl-1
WBGene00000884	RI:X:8913471:8913842-8913918:8914261:+	-0.0964006	0.0899101	RI	down	cyn-8
WBGene00000931	RI:I:10187979:10189166-10189992:10190132:-	-0.034267	0.0594406	RI	down	dao-5
WBGene00000938	A3:I:7539259-7539303:7539250-7539303:-	-0.0681839	0.0589411	A3	down	dcp-66
WBGene00000958	A5:X:989051-989481:989051-989487:-	0.914858	0.0304695	A5	up	dgk-1
WBGene00303038	A5:X:989051-989481:989051-989487:-	0.914858	0.0304695	A5	up	C09E10.3
WBGene00001080	SE:V:17941006-17943129:17946540-17947020:-	-0.113487	0.0424575	SE	down	dpy-21
WBGene00201469	SE:V:17941006-17943129:17946540-17947020:-	-0.113487	0.0424575	SE	down	Y59A8B.36
WBGene00001148	A3:X:15522418-15522926:15522418-15522932:+	-0.228299	0.03996	A3	down	eat-20
WBGene00198590	A3:X:15522418-15522926:15522418-15522932:+	-0.228299	0.03996	A3	down	H30A04.4
WBGene00199966	A3:X:15522418-15522926:15522418-15522932:+	-0.228299	0.03996	A3	down	H30A04.9
WBGene00001173	AF:IV:1848071:1848226-1860836:1858557:1858619-1860836:+	-0.0878212	0.0804196	AF	down	egl-4
WBGene00001333	AF:I:5290518-5290618:5290694:5290518-5291494:5291604:-	0.0434969	0.047952	AF	up	erm-1
WBGene00001489	AF:III:5979863-5981269:5981316:5979863-5982038:5982126:-	0.399434	0.0974026	AF	up	frm-2
WBGene00199937	AF:III:5979863-5981269:5981316:5979863-5982038:5982126:-	0.399434	0.0974026	AF	up	T04C9.10
WBGene00001562	A3:IV:13890543-13890672:13890543-13890681:+	-0.0683057	0.0989011	A3	down	lin-66
WBGene00172175	A3:IV:13890543-13890672:13890543-13890681:+	-0.0683057	0.0989011	A3	down	21ur-10065
WBGene00172088	A3:IV:13890543-13890672:13890543-13890681:+	-0.0683057	0.0989011	A3	down	21ur-14580
WBGene00174893	A3:IV:13890543-13890672:13890543-13890681:+	-0.0683057	0.0989011	A3	down	21ur-10153
WBGene00001707	MX:I:1263154-1263963:1264020-1264757:1263154-1264180:1264237-1264757:-	0.437188	0.0704296	MX	up	grh-1
WBGene00001978	A3:V:11850881-11851623:11850881-11851632:+	-0.137094	0.032967	A3	down	hmp-1
WBGene00001999	A5:IV:3337510-3337560:3337510-3337563:-	0.0524404	0.0899101	A5	up	hrp-1
WBGene00002021	A3:V:8385557-8385868:8385554-8385868:-	0.0794783	0.0484515	A3	up	hsp-17
WBGene00002036	A3:V:9392570-9393172:9392570-9393178:+	-0.116971	0.0164835	A3	down	hum-2
WBGene00002053	AF:II:5765618:5765774-5769099:5768945:5769000-5769099:+	-0.0924936	0.025974	AF	down	ifb-1
WBGene00002080	A3:IV:7923384-7923520:7923378-7923520:-	0.0550197	0.0969031	A3	up	xpo-3
WBGene00002176	A3:II:1346336-1347314:1346336-1347329:+	0.301995	0.0754246	A3	up	jip-1
WBGene00023296	A3:II:1346336-1347314:1346336-1347329:+	0.301995	0.0754246	A3	up	F56D12.t1
WBGene00023298	A3:II:1346336-1347314:1346336-1347329:+	0.301995	0.0754246	A3	up	F56D12.t3
WBGene00023299	A3:II:1346336-1347314:1346336-1347329:+	0.301995	0.0754246	A3	up	F56D12.t4
WBGene00002199	SE:II:9433060-9433308:9433487-9433540:-	-0.227764	0.0724276	SE	down	kin-15
WBGene00002280	MX:X:16386215-16386613:16386723-16386982:16386215-16386754:16386861-16386982:-	-0.0760385	0.00799201	MX	down	let-2
WBGene00199519	MX:X:16386215-16386613:16386723-16386982:16386215-16386754:16386861-16386982:-	-0.0760385	0.00799201	MX	down	F01G12.14
WBGene00196350	MX:X:16386215-16386613:16386723-16386982:16386215-16386754:16386861-16386982:-	-0.0760385	0.00799201	MX	down	F01G12.10
WBGene00002583	A3:I:5258750-5259296:5258750-5259305:+	-0.096419	0.042957	A3	down	let-363
WBGene00002879	AF:III:7951601-7951852:7951916:7951601-7953222:7953308:-	0.322305	0.020979	AF	up	let-754
WBGene00002891	A3:III:6339108-6339153:6339096-6339153:-	-0.0420767	0.0214785	A3	down	let-767
WBGene00002999	SE:I:8115308-8115784:8115867-8116643:-	0.106243	0.0799201	SE	up	lin-10
WBGene00003060	A3:I:3598762-3598810:3598756-3598810:-	-0.264417	0.021978	A3	down	lpd-3
WBGene00200878	A3:I:3598762-3598810:3598756-3598810:-	-0.264417	0.021978	A3	down	Y47G6A.35
WBGene00003132	A3:I:5125488-5125532:5125482-5125532:-	-0.0425664	0.0819181	A3	down	mat-1
WBGene00003144	A3:II:13025241-13025451:13025232-13025451:-	0.068522	0.0809191	A3	up	max-2
WBGene00003150	AL:IV:13033930-13034453:13034518:13033930-13034824:13035803:+	0.225307	0.0839161	AL	up	mbk-2
WBGene00166699	AL:IV:13033930-13034453:13034518:13033930-13034824:13035803:+	0.225307	0.0839161	AL	up	21ur-15150
WBGene00003243	AF:III:8294037:8294160-8300350:8300192:8300273-8300350:+	-0.142131	0.0869131	AF	down	mig-10
WBGene00199613	AF:III:8294037:8294160-8300350:8300192:8300273-8300350:+	-0.142131	0.0869131	AF	down	F10E9.16
WBGene00219889	AF:III:8294037:8294160-8300350:8300192:8300273-8300350:+	-0.142131	0.0869131	AF	down	F10E9.23
WBGene00202149	AF:III:8294037:8294160-8300350:8300192:8300273-8300350:+	-0.142131	0.0869131	AF	down	F10E9.22
WBGene00197192	AF:III:8294037:8294160-8300350:8300192:8300273-8300350:+	-0.142131	0.0869131	AF	down	F10E9.14
WBGene00197964	AF:III:8294037:8294160-8300350:8300192:8300273-8300350:+	-0.142131	0.0869131	AF	down	F10E9.15
WBGene00003420	A5:II:7078338-7078384:7078323-7078384:+	0.430712	0.0829171	A5	up	msh-4
WBGene00003478	A3:III:13352404-13352616:13352404-13352622:+	-0.0798307	0.0929071	A3	down	mtm-6
WBGene00003600	A3:X:17522481-17523475:17522481-17523490:+	0.114689	0.0734266	A3	up	nhr-1
WBGene00003612	SE:V:2196319-2196420:2196514-2196667:+	-0.137817	0.0734266	SE	down	nhr-13
WBGene00003622	AF:I:7214967:7214973-7219318:7218786:7219177-7219318:+	0.112805	0.0749251	AF	up	nhr-23
WBGene00003622	AF:I:7214967:7214973-7219318:7218823:7219177-7219318:+	0.605247	0.017982	AF	up	nhr-23
WBGene00003655	SE:V:18844074-18844255:18844362-18845181:+	-0.26004	0.0609391	SE	down	nhr-65
WBGene00003669	SE:V:19208603-19208844:19208908-19209102:-	0.281824	0.0769231	SE	up	nhr-79
WBGene00003704	A3:V:4188532-4188609:4188532-4188614:+	-0.0977821	0.037962	A3	down	nhr-114
WBGene00003738	SE:V:12914135-12914221:12914391-12914441:+	0.372053	0.0584416	SE	up	nid-1
WBGene00003754	A5:IV:6255475-6256271:6255475-6256275:-	-0.248084	0.0574426	A5	down	nlp-16
WBGene00003792	A3:I:5179852-5179897:5179852-5179906:+	-0.0744031	0.048951	A3	down	npp-6
WBGene00018909	A3:I:5179852-5179897:5179852-5179906:+	-0.0744031	0.048951	A3	down	slx-1
WBGene00003847	SE:I:10412946-10413362:10413409-10413493:+	0.350898	0.0529471	SE	up	blmp-1
WBGene00003884	RI:IV:3802880:3803028-3803071:3803202:-	0.0755179	0.0854146	RI	up	osm-3
WBGene00019725	RI:IV:3802880:3803028-3803071:3803202:-	0.0755179	0.0854146	RI	up	algn-14
WBGene00003911	A3:X:6047380-6047429:6047371-6047429:-	-0.134023	0.0499501	A3	down	pak-1
WBGene00003965	A3:X:1325028-1325069:1325028-1325075:+	-0.103385	0.0859141	A3	down	pdk-1
WBGene00003965	A3:X:1325670-1326073:1325670-1326079:+	-0.103385	0.0859141	A3	down	pdk-1
WBGene00004056	A5:IV:8148131-8148182:8148116-8148182:+	0.228057	0.0659341	A5	up	pmk-2
WBGene00004075	SE:III:13521404-13523745:13523876-13524031:-	-0.0509322	0.0539461	SE	down	pod-1
WBGene00014951	SE:III:13521404-13523745:13523876-13524031:-	-0.0509322	0.0539461	SE	down	Y76A2B.t2
WBGene00004089	A3:X:12975515-12975565:12975506-12975565:-	-0.19908	0.0224775	A3	down	ppk-3
WBGene00004095	A3:III:5315769-5315809:5315769-5315815:+	-0.106009	0.0849151	A3	down	pqe-1
WBGene00004111	RI:I:6777197:6777260-6777315:6777382:-	-0.110681	0.0709291	RI	down	pqn-21
WBGene00004131	AF:I:5376341-5377303:5377438:5376341-5379733:5380032:-	0.520345	0.038961	AF	up	pqn-44
WBGene00004138	RI:V:12064091:12064480-12064863:12064919:-	0.0674435	0.032967	RI	up	pqn-53
WBGene00220036	RI:V:12064091:12064480-12064863:12064919:-	0.0674435	0.032967	RI	up	R07B7.20
WBGene00004147	A5:I:3733703-3734340:3733703-3734433:-	0.0503701	0.0914086	A5	up	larp-5
WBGene00004148	A3:X:4615517-4615811:4615511-4615811:-	-0.128244	0.0264735	A3	down	pqn-65
WBGene00004318	A5:I:7962164-7962216:7962162-7962216:+	0.0888177	0.0659341	A5	up	rbg-2
WBGene00004336	AF:V:14830317-14830761:14831027:14830317-14831419:14831621:-	0.0728473	0.0374625	AF	up	ret-1
WBGene00220121	AF:V:14830317-14830761:14831027:14830317-14831419:14831621:-	0.0728473	0.0374625	AF	up	W06A7.12
WBGene00004350	A3:X:3547758-3547821:3547758-3547830:+	-0.235274	0.0569431	A3	down	rgs-7
WBGene00004403	A3:IV:16999834-17002694:16999834-17002700:+	0.0886408	0.0999001	A3	up	rom-4
WBGene00004404	A3:I:3220829-3220941:3220805-3220941:-	0.079649	0.0899101	A3	up	rom-5
WBGene00004879	A3:I:6909047-6909087:6909041-6909087:-	-0.0745457	0.0939061	A3	down	smg-1
WBGene00004945	A3:II:12342268-12342630:12342268-12342636:+	-0.147842	0.0484515	A3	down	sop-2
WBGene00199687	A3:II:12342268-12342630:12342268-12342636:+	-0.147842	0.0484515	A3	down	C50E10.13
WBGene00004946	A3:I:2765695-2765738:2765677-2765738:-	-0.109035	0.0989011	A3	down	sop-3
WBGene00005008	A3:X:4514158-4514209:4514158-4514212:+	-0.229767	0.00799201	A3	down	spr-3
WBGene00005009	A3:I:8108258-8108727:8108258-8108733:+	-0.0679467	0.0964036	A3	down	spr-4
WBGene00006349	A3:I:14783436-14783771:14783430-14783771:-	-0.108537	0.0539461	A3	down	sur-2
WBGene00006407	AF:I:9195124-9198809:9199311:9195124-9205587:9205732:-	-0.254058	0.0854146	AF	down	lim-9
WBGene00006410	A3:X:4150266-4150308:4150260-4150308:-	-0.209629	0.0144855	A3	down	nck-1
WBGene00006434	AF:II:5378195:5378206-5378842:5378423:5378440-5378842:+	-0.131178	0.0024975	AF	down	prdx-2
WBGene00006600	RI:II:7549818:7549917-7549958:7550309:+	-1	0	RI	down	tph-1
WBGene00174943	RI:II:7549818:7549917-7549958:7550309:+	-1	0	RI	down	21ur-14885
WBGene00006615	A5:III:999362-999663:999358-999663:+	0.503986	0.0944056	A5	up	trp-2
WBGene00006617	AF:II:11694077-11694144:11694293:11694077-11695557:11695657:-	0.0625373	0.0729271	AF	up	tars-1
WBGene00006648	AL:V:163364-163413:163660:163364-166568:166870:+	0.504808	0.015984	AL	up	ttb-1
WBGene00006650	RI:X:1504131:1504422-1504475:1504841:-	-0.43553	0	RI	down	tts-1
WBGene00006754	RI:I:7376604:7376821-7376887:7377321:-	0.0908401	0.00549451	RI	up	unc-15
WBGene00006923	RI:II:5339075:5339966-5340035:5340247:+	-0.436847	0.0599401	RI	down	vhp-1
WBGene00219881	RI:II:5339075:5339966-5340035:5340247:+	-0.436847	0.0599401	RI	down	F08B1.8
WBGene00006937	RI:III:11994059:11994103-11994424:11994549:+	0.0882589	0.03996	RI	up	wah-1
WBGene00006941	A3:IV:9203377-9203709:9203377-9203715:+	-0.0879981	0.0559441	A3	down	wnk-1
WBGene00006941	A3:IV:9210676-9211244:9210676-9211251:+	-0.0811052	0.0559441	A3	down	wnk-1
WBGene00006976	A3:I:8530412-8530453:8530406-8530453:-	0.0565946	0.0919081	A3	up	zhp-3
WBGene00014418	A3:I:8530412-8530453:8530406-8530453:-	0.0565946	0.0919081	A3	up	K02B12.t1
WBGene00007007	A3:IV:885421-886442:885421-886496:+	0.10047	0.0859141	A3	up	mak-2
WBGene00007016	A3:III:5832784-5832835:5832775-5832835:-	0.0669946	0.0689311	A3	up	mdt-15
WBGene00303073	A3:III:5832784-5832835:5832775-5832835:-	0.0669946	0.0689311	A3	up	R12B2.13
WBGene00007260	AF:X:15537662:15537740-15543198:15543006:15543104-15543198:+	-0.644908	0.0414585	AF	down	olrn-1
WBGene00303034	AF:X:15537662:15537740-15543198:15543006:15543104-15543198:+	-0.644908	0.0414585	AF	down	C02C6.14
WBGene00007287	A3:X:13681355-13681399:13681355-13681411:+	0.161651	0.0354645	A3	up	gck-4
WBGene00007309	AF:IV:10115442:10115562-10116768:10116204:10116266-10116768:+	0.472379	0.044955	AF	up	C04G2.10
WBGene00007487	SE:X:15960218-15960401:15960496-15961893:+	-0.544986	0.034965	SE	down	C09G1.5
WBGene00007534	A3:V:10238343-10238741:10238111-10238741:-	0.104759	0.0854146	A3	up	fubl-1
WBGene00007534	SE:V:10238111-10238292:10238343-10238741:-	0.0638548	0.0839161	SE	up	fubl-1
WBGene00007651	A3:X:9927024-9927069:9927014-9927069:-	0.112389	0.0784216	A3	up	nra-3
WBGene00007696	A3:IV:10220607-10220650:10220601-10220650:-	-0.0379486	0.0879121	A3	down	tram-1
WBGene00007711	A3:I:10192587-10192634:10192582-10192634:-	-0.0870867	0.042957	A3	down	lid-1
WBGene00007753	AF:V:12131457:12131528-12132948:12132184:12132256-12132948:+	0.490659	0.03996	AF	up	C27A7.1
WBGene00007801	A3:IV:11864628-11865069:11864628-11865072:+	0.620523	0.046953	A3	up	trpa-1
WBGene00198313	A3:IV:11864628-11865069:11864628-11865072:+	0.620523	0.046953	A3	up	C29E6.13
WBGene00003319	A3:IV:11864628-11865069:11864628-11865072:+	0.620523	0.046953	A3	up	mir-124
WBGene00196375	A3:IV:11864628-11865069:11864628-11865072:+	0.620523	0.046953	A3	up	C29E6.11
WBGene00007944	AF:X:11236712-11237283:11237383:11236712-11240510:11240626:-	0.708221	0.0589411	AF	up	C34F6.10
WBGene00007944	AF:X:11236712-11237283:11237383:11236712-11240510:11240635:-	0.417158	0.0589411	AF	up	C34F6.10
WBGene00007955	A3:X:11546385-11546429:11546376-11546429:-	0.061226	0.0849151	A3	up	selt-1.1
WBGene00008100	A3:V:12847502-12847555:12847493-12847555:-	-0.24975	0.0899101	A3	down	C44H9.5
WBGene00008133	SE:I:12979141-12979893:12980015-12980420:+	0.148447	0.046953	SE	up	efsc-1
WBGene00008134	SE:I:12979141-12979893:12980015-12980420:+	0.148447	0.046953	SE	up	C47B2.9
WBGene00008399	A3:I:7815083-7815248:7815083-7815255:+	-0.107827	0.0464535	A3	down	D2005.4
WBGene00174114	A3:I:7815083-7815248:7815083-7815255:+	-0.107827	0.0464535	A3	down	21ur-12756
WBGene00008503	A3:IV:11145304-11145402:11145304-11145411:+	0.0635743	0.0749251	A3	up	F01G4.4
WBGene00008601	AF:X:13155478-13155581:13155808:13155478-13158413:13158543:-	-0.437942	0.0287213	AF	down	mob-2
WBGene00008601	AF:X:13155478-13155581:13155808:13155478-13161338:13161476:-	-0.657874	0.0674326	AF	down	mob-2
WBGene00008601	AF:X:13155478-13155581:13155809:13155478-13158413:13158543:-	0.469045	0.0287213	AF	up	mob-2
WBGene00008774	A3:IV:11014828-11014871:11014822-11014871:-	-0.104665	0.0294705	A3	down	F13H10.3
WBGene00008926	A3:X:13114059-13114157:13114059-13114163:+	-0.392158	0.0994006	A3	down	F17H10.2
WBGene00008944	A3:V:20163579-20163675:20163430-20163675:-	0.150873	0.00899101	A3	up	F19B2.5
WBGene00009018	A5:V:19256227-19256582:19256148-19256582:+	0.638969	0.0874126	A5	up	F21D9.4
WBGene00197143	A5:V:19256227-19256582:19256148-19256582:+	0.638969	0.0874126	A5	up	F21D9.10
WBGene00009180	A3:II:14400751-14400792:14400751-14400798:+	-0.0743297	0.0979021	A3	down	nurf-1
WBGene00009188	A3:I:7706621-7706848:7706618-7706848:-	-0.0752707	0.0679321	A3	down	lsy-22
WBGene00303056	A3:I:7706621-7706848:7706618-7706848:-	-0.0752707	0.0679321	A3	down	F27D4.12
WBGene00009259	RI:X:11512662:11512799-11512846:11517504:-	-0.499018	0.034965	RI	down	hpo-34
WBGene00009259	RI:X:11512846:11515071-11515120:11517504:-	0.263166	0.0536963	RI	up	hpo-34
WBGene00009267	A3:I:9509421-9509463:9509421-9509469:+	-0.0505183	0.0894106	A3	down	usp-48
WBGene00009331	A3:V:10899432-10899628:10899432-10899634:+	0.612905	0.0974026	A3	up	F32D8.7
WBGene00009433	RI:V:13741607:13741933-13742666:13743123:-	-0.216139	0.0484515	RI	down	F35E12.9
WBGene00009451	A3:I:8807369-8807421:8807363-8807421:-	-0.325634	0.0122378	A3	down	cids-2
WBGene00009451	A3:I:8807381-8807421:8807363-8807421:-	-0.187049	0.0122378	A3	down	cids-2
WBGene00009451	RI:I:8807290:8807363-8807421:8807524:-	-0.303231	0.0594406	RI	down	cids-2
WBGene00009584	AF:V:9730106:9730166-9732515:9731370:9732237-9732515:+	0.100749	0.0172328	AF	up	drap-1
WBGene00196611	AF:V:9730106:9730166-9732515:9731370:9732237-9732515:+	0.100749	0.0172328	AF	up	F40F9.14
WBGene00009584	SE:V:9730166-9731959:9732237-9732515:+	0.135827	0.011988	SE	up	drap-1
WBGene00196611	SE:V:9730166-9731959:9732237-9732515:+	0.135827	0.011988	SE	up	F40F9.14
WBGene00009678	A3:IV:10011292-10011336:10011292-10011342:+	-0.19078	0.0669331	A3	down	magu-4
WBGene00009793	A5:X:10397874-10398133:10397517-10398133:+	-0.132738	0.0889111	A5	down	pkn-1
WBGene00010143	A3:V:14376226-14376277:14376217-14376277:-	1	0	A3	up	F56A12.2
WBGene00010453	SE:III:9281933-9286026:9286079-9293195:+	0.666667	0.0384615	SE	up	fozi-1
WBGene00010552	A5:X:14238918-14238965:14238891-14238965:+	-0.157518	0.0614386	A5	down	K04C1.2
WBGene00010631	A3:V:10363096-10363144:10363096-10363153:+	-0.0354915	0.0804196	A3	down	cash-1
WBGene00010667	RI:IV:12059500:12059636-12059787:12059951:+	-0.134583	0.046953	RI	down	K08E4.3
WBGene00010681	A3:II:8746134-8746355:8746134-8746588:+	0.285289	0.0044955	A3	up	mak-1
WBGene00010681	SE:II:8746134-8746355:8746479-8746588:+	0.202437	0	SE	up	mak-1
WBGene00010922	A3:III:10931325-10931375:10931325-10931381:+	-0.0798572	0.0494505	A3	down	M142.5
WBGene00011236	SE:IV:10356732-10356777:10356869-10356912:-	0.111164	0.048951	SE	up	R11A8.1
WBGene00011300	A3:III:9052377-9052422:9052371-9052422:-	0.16115	0.000999001	A3	up	R107.5
WBGene00011488	A3:I:9621283-9621326:9621283-9621335:+	-0.0426889	0.0524476	A3	down	nra-2
WBGene00011488	A3:I:9621458-9621499:9621458-9621508:+	-0.0426889	0.0524476	A3	down	nra-2
WBGene00011580	A5:II:8886694-8887037:8885542-8887037:+	-0.0737737	0.0749251	A5	down	ddx-19
WBGene00011580	SE:II:8885388-8885468:8885542-8887037:+	0.362258	0.0704296	SE	up	ddx-19
WBGene00011625	A3:V:14035997-14036045:14035988-14036045:-	-0.0651403	0.0929071	A3	down	vps-39
WBGene00011647	AF:V:13153941:13153980-13162315:13159728:13159779-13162315:+	-0.311092	0.0641026	AF	down	noca-1
WBGene00201507	AF:V:13153941:13153980-13162315:13159728:13159779-13162315:+	-0.311092	0.0641026	AF	down	K03H4.7
WBGene00011647	AF:V:13156784:13156841-13162315:13159728:13159779-13162315:+	-0.333333	0.0641026	AF	down	noca-1
WBGene00201507	AF:V:13156784:13156841-13162315:13159728:13159779-13162315:+	-0.333333	0.0641026	AF	down	K03H4.7
WBGene00011647	AF:V:13159728:13159779-13162315:13161401:13161979-13162315:+	0.190525	0.0641026	AF	up	noca-1
WBGene00201507	AF:V:13159728:13159779-13162315:13161401:13161979-13162315:+	0.190525	0.0641026	AF	up	K03H4.7
WBGene00011738	AF:IV:12043508-12043616:12043737:12043508-12046849:12046857:-	0.4132	0.034965	AF	up	T12G3.2
WBGene00011938	A3:X:12782634-12783392:12782634-12783398:+	0.151288	0.0869131	A3	up	alh-13
WBGene00011977	A3:II:9060097-9060855:9060094-9060855:-	0.116674	0.00899101	A3	up	T24B8.3
WBGene00167037	A3:II:9060097-9060855:9060094-9060855:-	0.116674	0.00899101	A3	up	21ur-14806
WBGene00012204	A3:II:11471769-11471958:11471763-11471958:-	0.0828645	0.0879121	A3	up	mfn-1
WBGene00012245	A3:V:12502232-12502564:12502232-12502570:+	-0.0470979	0.0794206	A3	down	rbm-25
WBGene00012326	SE:X:10098093-10098798:10098827-10099066:+	0.0714828	0.0969031	SE	up	W07E11.1
WBGene00199903	SE:X:10098093-10098798:10098827-10099066:+	0.0714828	0.0969031	SE	up	W07E11.6
WBGene00197930	SE:X:10098093-10098798:10098827-10099066:+	0.0714828	0.0969031	SE	up	T06H11.11
WBGene00012347	A3:V:16370770-16370837:16370770-16370843:+	-0.0790247	0.0654346	A3	down	W08G11.3
WBGene00023429	A3:V:16370770-16370837:16370770-16370843:+	-0.0790247	0.0654346	A3	down	W08G11.6
WBGene00012347	A5:V:16367777-16368387:16367774-16368387:+	0.0790247	0.0654346	A5	up	W08G11.3
WBGene00023429	A5:V:16367777-16368387:16367774-16368387:+	0.0790247	0.0654346	A5	up	W08G11.6
WBGene00012370	A3:I:13801169-13801824:13801162-13801824:-	-0.105934	0.0669331	A3	down	W09G3.7
WBGene00012428	AF:IV:9233091:9233117-9237240:9236982:9237056-9237240:+	-0.0852852	0.0979021	AF	down	Y11D7A.3
WBGene00012463	AF:II:12049581:12049640-12054693:12054313:12054501-12054693:+	-0.100098	0.0859141	AF	down	Y17G7B.10
WBGene00012463	AF:II:12049583:12049640-12054693:12054313:12054501-12054693:+	-0.25292	0.0859141	AF	down	Y17G7B.10
WBGene00012463	AF:II:12049583:12049640-12055513:12054689:12054834-12055513:+	-0.0892924	0.0949051	AF	down	Y17G7B.10
WBGene00012463	SE:II:12049640-12054693:12054834-12055513:+	-0.085108	0.0859141	SE	down	Y17G7B.10
WBGene00012530	AL:V:10446534:10446602-10451489:10451335:10451437-10451489:-	-0.0360307	0.0979021	AL	down	Y32F6A.5
WBGene00012666	A3:V:19189851-19189900:19189845-19189900:-	-0.05473	0.0989011	A3	down	Y39B6A.3
WBGene00012857	A3:V:20917166-20917453:20917166-20917468:+	0.309163	0.0644356	A3	up	pbo-5
WBGene00198666	A3:V:20917166-20917453:20917166-20917468:+	0.309163	0.0644356	A3	up	cTel17.2
WBGene00012868	A5:IV:13478563-13479650:13478563-13479656:-	0.0758748	0.0979021	A5	up	tbc-9
WBGene00197610	A5:IV:13478563-13479650:13478563-13479656:-	0.0758748	0.0979021	A5	up	Y38H8A.11
WBGene00012869	AF:IV:13493952:13493970-13495144:13494683:13494962-13495144:+	0.415174	0.034965	AF	up	Y45F10A.7
WBGene00012980	AF:II:14184179:14184278-14187862:14187778:14187806-14187862:+	0.174916	0.0689311	AF	up	efhd-1
WBGene00012988	A3:II:13281513-13282572:13281507-13282572:-	-0.144901	0.0509491	A3	down	ztf-22
WBGene00199755	A3:II:13281513-13282572:13281507-13282572:-	-0.144901	0.0509491	A3	down	Y48C3A.22
WBGene00012994	A3:II:13376514-13377443:13376514-13377449:+	0.0835062	0.033966	A3	up	Y48C3A.12
WBGene00012994	A3:II:13387565-13388468:13387565-13388479:+	0.0835062	0.033966	A3	up	Y48C3A.12
WBGene00013218	A5:II:14347356-14347781:14347356-14347784:-	-0.109824	0.0394605	A5	down	Y54G11A.9
WBGene00002996	A5:II:14347356-14347781:14347356-14347784:-	-0.109824	0.0394605	A5	down	lin-7
WBGene00185067	A5:II:14347356-14347781:14347356-14347784:-	-0.109824	0.0394605	A5	down	Y54G11A.17
WBGene00013308	SE:IV:14797073-14797134:14797182-14797385:-	0.0221832	0.0834166	SE	up	nuo-3
WBGene00303007	SE:IV:14797073-14797134:14797182-14797385:-	0.0221832	0.0834166	SE	up	Y57G11C.1147
WBGene00013670	AF:I:14418197:14418304-14422413:14422180:14422265-14422413:+	-0.251459	0.043956	AF	down	hpo-13
WBGene00013676	A3:I:14474931-14476345:14474931-14476351:+	-0.0837128	0.0304695	A3	down	ekl-4
WBGene00013682	A3:I:14571787-14572719:14571778-14572719:-	-0.0676408	0.0914086	A3	down	Y105E8A.25
WBGene00201794	A3:I:14571787-14572719:14571778-14572719:-	-0.0676408	0.0914086	A3	down	Y105E8A.48
WBGene00013682	SE:I:14567497-14569917:14569940-14570053:-	-0.0676408	0.0914086	SE	down	Y105E8A.25
WBGene00201794	SE:I:14567497-14569917:14569940-14570053:-	-0.0676408	0.0914086	SE	down	Y105E8A.48
WBGene00013695	SE:I:9933697-9933862:9933997-9934153:-	0.0536645	0.0999001	SE	up	epg-8
WBGene00015131	SE:III:8706980-8707261:8707314-8707410:-	0.238028	0.0444555	SE	up	B0303.11
WBGene00197908	SE:III:8706980-8707261:8707314-8707410:-	0.238028	0.0444555	SE	up	B0303.17
WBGene00015138	SE:X:505551-505787:505975-506111:-	-0.199927	0.0869131	SE	down	B0310.2
WBGene00201813	SE:X:505551-505787:505975-506111:-	-0.199927	0.0869131	SE	down	B0310.12
WBGene00201176	SE:X:505551-505787:505975-506111:-	-0.199927	0.0869131	SE	down	B0310.11
WBGene00015143	SE:III:5712261-5712350:5712541-5712614:+	-0.117333	0.0284715	SE	down	rbm-26
WBGene00015344	A3:V:1048412-1048461:1048406-1048461:-	-0.082358	0.034965	A3	down	nra-4
WBGene00015492	A3:X:4589923-4589962:4589923-4589974:+	-0.139187	0.0539461	A3	down	lnp-1
WBGene00015733	AL:III:6622217-6622591:6622755:6622217-6623062:6623293:+	0.324297	0.0354645	AL	up	C13B9.2
WBGene00016033	A5:X:8998280-8998599:8998156-8998599:+	0.106369	0.0499501	A5	up	C24A3.2
WBGene00016112	RI:II:5694653:5694832-5694987:5695237:+	-0.0956919	0.0629371	RI	down	C25H3.3
WBGene00016123	RI:II:5694653:5694832-5694987:5695237:+	-0.0956919	0.0629371	RI	down	C25H3.14
WBGene00016115	RI:II:5661194:5661313-5661710:5661781:+	-0.807649	0.000499501	RI	down	mdt-26
WBGene00016119	RI:II:5697182:5697221-5697266:5697397:-	0.221747	0.0664336	RI	up	C25H3.10
WBGene00016278	A5:I:5420101-5420600:5420101-5420641:-	-0.711395	0.00599401	A5	down	erp-44.1
WBGene00016291	A3:IV:5813613-5813656:5813607-5813656:-	0.0415865	0.0859141	A3	up	C31H1.8
WBGene00016405	A3:IV:7141067-7141112:7141061-7141112:-	-0.0844896	0.043956	A3	down	hecd-1
WBGene00016489	SE:X:17434578-17434917:17434986-17435414:+	-0.111464	0.048951	SE	down	fubl-3
WBGene00016620	A3:X:2401875-2401930:2401869-2401930:-	-0.168364	0.0749251	A3	down	dhhc-9
WBGene00016888	A3:II:7027183-7027227:7027183-7027233:+	-0.0596056	0.0789211	A3	down	C52E12.1
WBGene00016907	A5:I:1833408-1833451:1833383-1833451:+	-0.0826518	0.026973	A5	down	C53H9.2
WBGene00016907	RI:I:1833219:1833383-1833451:1833722:+	-0.106758	0.026973	RI	down	C53H9.2
WBGene00016907	RI:I:1833219:1833408-1833451:1833722:+	-0.0546978	0.0685981	RI	down	C53H9.2
WBGene00017310	RI:V:7200628:7200734-7200786:7200944:+	-0.28684	0.03996	RI	down	F09G2.1
WBGene00017483	SE:IV:4302466-4302572:4302619-4302774:+	-0.161397	0.0704296	SE	down	lgc-22
WBGene00017565	A5:V:7434602-7434840:7434602-7434845:-	0.0663823	0.0919081	A5	up	ddo-2
WBGene00017571	A3:X:8571122-8571395:8571122-8571448:+	0.284372	0.0854146	A3	up	jmjd-3.1
WBGene00017852	A3:I:5430705-5430761:5430705-5430773:+	-0.0534002	0.0474525	A3	down	F27C1.2
WBGene00017988	A3:V:4372893-4372937:4372893-4372952:+	-0.0850232	0.014985	A3	down	fipp-1
WBGene00018161	A3:IV:6585136-6585208:6585130-6585208:-	-0.0610019	0.0764236	A3	down	F38A5.2
WBGene00018232	A3:I:2648127-2657172:2648057-2657172:-	0.666667	0.0644356	A3	up	F40E3.5
WBGene00018233	A3:I:2648127-2657172:2648057-2657172:-	0.666667	0.0644356	A3	up	F40E3.6
WBGene00200510	A3:I:2648127-2657172:2648057-2657172:-	0.666667	0.0644356	A3	up	F40E3.9
WBGene00018319	A3:IV:5363810-5363854:5363804-5363854:-	-0.0738195	0.0334665	A3	down	hda-6
WBGene00018594	A3:I:5328386-5328430:5328386-5328433:+	0.478112	0.0589411	A3	up	aman-3
WBGene00018632	A3:I:10934239-10934901:10934236-10934901:-	-0.0523264	0.0969031	A3	down	tag-296
WBGene00018717	A3:X:2562276-2562514:2562249-2562514:-	-0.187662	0.0589411	A3	down	F52H2.5
WBGene00018718	A3:X:2562276-2562514:2562249-2562514:-	-0.187662	0.0589411	A3	down	F52H2.6
WBGene00018957	AF:I:178524:178620-180600:180081:180465-180600:+	0.0777106	0.0924076	AF	up	F56C11.5
WBGene00019318	A5:X:2483663-2483709:2483660-2483709:+	0.568993	0.0384615	A5	up	K02E10.4
WBGene00019466	A3:V:9343567-9343676:9343416-9343676:-	0.0974784	0.024975	A3	up	tos-1
WBGene00019466	RI:V:9343676:9343796-9343946:9344129:-	-0.335436	0	RI	down	tos-1
WBGene00019466	SE:V:9343416-9343501:9343567-9343676:-	0.232621	0	SE	up	tos-1
WBGene00019504	A3:IV:8291835-8292765:8291835-8292777:+	-0.078905	0.0509491	A3	down	K07H8.2
WBGene00019674	A5:I:1336158-1336209:1336116-1336209:+	-0.287279	0.0899101	A5	down	K12C11.3
WBGene00019713	SE:I:5569199-5569545:5569568-5569705:-	-0.0606149	0.0124875	SE	down	pqn-52
WBGene00019831	A3:III:5505202-5505248:5505202-5505254:+	-0.0417337	0.0899101	A3	down	R02F2.1
WBGene00019909	AF:I:1077425:1077542-1085989:1084531:1084671-1085989:+	-0.666667	0.0499501	AF	down	R06A10.1
WBGene00044895	AF:I:1077425:1077542-1085989:1084531:1084671-1085989:+	-0.666667	0.0499501	AF	down	R06A10.5
WBGene00019975	AF:V:1029822-1031529:1031652:1029822-1033330:1033404:-	-0.351932	0.0799201	AF	down	flp-34
WBGene00020131	A3:I:4500591-4500647:4500591-4500650:+	-0.0849565	0.0711788	A3	down	gcy-28
WBGene00020131	SE:I:4500922-4501784:4501822-4502570:+	0.0849565	0.0711788	SE	up	gcy-28
WBGene00020169	A5:II:7101067-7101111:7101067-7101115:-	-0.0806339	0.024975	A5	down	mmaa-1
WBGene00020214	A3:X:792029-792087:792029-792123:+	-0.298715	0.043956	A3	down	attf-5
WBGene00020401	AF:I:6941970-6942251:6942364:6941970-6943009:6943077:-	0.666667	0.041958	AF	up	T10B11.5
WBGene00020453	A3:III:934466-935955:934379-935955:-	-0.501284	0.0824176	A3	down	fbxa-55
WBGene00020453	SE:III:933797-933839:934379-935955:-	0.486849	0.0824176	SE	up	fbxa-55
WBGene00020481	A3:II:6783822-6783868:6783822-6783874:+	-0.0351659	0.0949051	A3	down	T13C2.6
WBGene00020770	A3:X:16407951-16408004:16407942-16408004:-	-0.11011	0.0814186	A3	down	eat-17
WBGene00200076	A3:X:16407951-16408004:16407942-16408004:-	-0.11011	0.0814186	A3	down	T24D11.5
WBGene00021000	A3:V:127852-127895:127838-127895:-	0.168048	0.018981	A3	up	W03F9.2
WBGene00021048	A3:X:6273162-6273207:6273162-6273231:+	0.0665173	0.0944056	A3	up	W05H9.1
WBGene00021104	A3:II:1134057-1134095:1134051-1134095:-	-0.0776676	0.0794206	A3	down	W09B6.4
WBGene00021249	AF:III:1633367-1633727:1633792:1633367-1634305:1634370:-	0.333333	0.0719281	AF	up	Y22D7AL.11
WBGene00021329	A3:I:1039172-1039215:1039172-1039224:+	-0.106878	0.0544456	A3	down	Y34D9A.3
WBGene00021395	AF:IV:184484:184709-189486:186254:186431-189486:+	-0.246385	0.0589411	AF	down	pnc-1
WBGene00196851	AF:IV:184484:184709-189486:186254:186431-189486:+	-0.246385	0.0589411	AF	down	Y38C1AA.15
WBGene00021396	A5:IV:166033-166520:166027-166520:+	-0.878465	0.0484515	A5	down	cutl-24
WBGene00021508	A5:IV:1741432-1741480:1741432-1741486:-	-0.0705806	0.0824176	A5	down	Y41D4A.6
WBGene00021529	A5:X:2947063-2947746:2946834-2947746:+	0.666667	0.0979021	A5	up	Y41G9A.5
WBGene00021533	RI:III:6147191:6147547-6147706:6148065:+	-0.243528	0.0829171	RI	down	Y42G9A.3
WBGene00021610	A5:V:1626328-1626736:1626328-1626740:-	-0.504497	0.0669331	A5	down	nhr-237
WBGene00021815	A5:III:3293807-3293896:3293807-3293923:-	-0.0835112	0.0949051	A5	down	Y53G8AR.8
WBGene00021868	A3:IV:2795893-2796378:2795893-2796430:+	-0.0468849	0.0619381	A3	down	atln-1
WBGene00021898	RI:IV:2900899:2901097-2901144:2901365:+	-0.385135	0.0659341	RI	down	Y54G2A.36
WBGene00021956	A5:V:7062076-7062189:7062058-7062189:+	-0.0375569	0.0804196	A5	down	Y57E12AL.1
WBGene00022019	A3:V:4562942-4564367:4562936-4564367:-	-0.0650729	0.0634366	A3	down	sut-2
WBGene00022048	A3:IV:374530-374571:374524-374571:-	-0.129524	0.02997	A3	down	fln-1
WBGene00220192	A3:IV:374530-374571:374524-374571:-	-0.129524	0.02997	A3	down	Y66H1B.6
WBGene00022063	SE:IV:3174742-3175558:3175638-3176016:-	-0.273665	0.0679321	SE	down	nlp-81
WBGene00022152	A3:I:1710996-1712710:1710996-1712716:+	-0.0661647	0.0634366	A3	down	atg-5
WBGene00022158	SE:I:1670284-1670969:1671255-1671780:-	0.202616	0.0659341	SE	up	Y71G12B.23
WBGene00022235	A3:IV:6325233-6325311:6325233-6325320:+	-0.0249602	0.0729271	A3	down	sqd-1
WBGene00022247	AF:IV:6451534-6451677:6451680:6451534-6457474:6457572:-	-0.666667	0.0634366	AF	down	lgc-10
WBGene00049373	AF:IV:6451534-6451677:6451680:6451534-6457474:6457572:-	-0.666667	0.0634366	AF	down	21ur-1363
WBGene00174978	AF:IV:6451534-6451677:6451680:6451534-6457474:6457572:-	-0.666667	0.0634366	AF	down	21ur-7472
WBGene00170184	AF:IV:6451534-6451677:6451680:6451534-6457474:6457572:-	-0.666667	0.0634366	AF	down	21ur-6018
WBGene00168159	AF:IV:6451534-6451677:6451680:6451534-6457474:6457572:-	-0.666667	0.0634366	AF	down	21ur-11296
WBGene00165574	AF:IV:6451534-6451677:6451680:6451534-6457474:6457572:-	-0.666667	0.0634366	AF	down	21ur-11844
WBGene00022473	A3:I:4530009-4530060:4530003-4530060:-	-0.0950638	0.0719281	A3	down	bet-1
WBGene00022475	RI:I:4555877:4556015-4556063:4556163:-	-0.286299	0.0184815	RI	down	Y119C1B.10
WBGene00022647	AF:X:17463912-17463971:17464087:17463912-17464810:17464901:-	-0.305098	0.0414585	AF	down	slc-17.1
WBGene00022681	A3:IV:4551237-4552008:4551237-4552020:+	-0.0981326	0.0904096	A3	down	ZK185.1
WBGene00022855	RI:II:7046944:7048283-7048438:7048988:-	0.347534	0.0999001	RI	up	tcer-1
WBGene00045418	A5:V:13007287-13007332:13007287-13007338:-	0.067073	0.0614386	A5	up	F15B9.10
WBGene00086557	SE:I:8670220-8670889:8671038-8673521:-	-0.629489	0.0244755	SE	down	K07A12.8
WBGene00185078	AL:III:227575-228617:228815:227575-230429:230450:+	-0.258843	0.0509491	AL	down	F40G9.17
WBGene00199263	AL:III:227575-228617:228815:227575-230429:230450:+	-0.258843	0.0509491	AL	down	W10C4.2
WBGene00002230	AL:III:227575-228617:228815:227575-230429:230450:+	-0.258843	0.0509491	AL	down	klp-20
WBGene00021755	AL:III:227575-228617:228815:227575-230429:230450:+	-0.258843	0.0509491	AL	down	hpo-38
WBGene00194861	A3:III:10438421-10438827:10438415-10438827:-	0.113624	0.0769231	A3	up	H04D03.6
WBGene00235269	RI:II:5628821:5629447-5629975:5630077:-	-0.283267	0.0779221	RI	down	F59E12.15
WBGene00235270	RI:II:5628821:5629447-5629975:5630077:-	-0.283267	0.0779221	RI	down	F59E12.16
WBGene00019122	RI:II:5628821:5629447-5629975:5630077:-	-0.283267	0.0779221	RI	down	F59E12.6

## Sheet: prde1.30minHS.prde2.Ctrl
gene	events	dPSI	pval	event	Direction	gene_name
WBGene00000079	A5:I:7774595-7774643:7774455-7774643:+	0.163514	0.0524476	A5	up	adr-1
WBGene00000079	SE:I:7774270-7774398:7774455-7774643:+	-0.159629	0.0524476	SE	down	adr-1
WBGene00000144	A5:V:10426255-10426313:10426255-10426317:-	-0.085807	0.0609391	A5	down	apc-10
WBGene00000144	A5:V:10426255-10426313:10426255-10426321:-	-0.0869547	0.0609391	A5	down	apc-10
WBGene00000156	A3:I:8052440-8052482:8052440-8052488:+	-0.0594912	0.0904096	A3	down	2025-04-01
WBGene00000264	A5:III:3859045-3859093:3859045-3859096:-	0.0779769	0.0899101	A5	up	brc-1
WBGene00000375	AF:II:5505870:5505893-5506240:5506092:5506165-5506240:+	-0.255632	0.0589411	AF	down	cyp-44A1
WBGene00022672	AF:II:5505870:5505893-5506240:5506092:5506165-5506240:+	-0.255632	0.0589411	AF	down	npp-24
WBGene00000442	AF:IV:7954750-7954803:7954833:7954750-7955568:7955949:-	-0.571575	0.0839161	AF	down	ceh-19
WBGene00000549	A3:III:9058221-9058264:9058221-9058273:+	0.0937539	0.0744256	A3	up	cls-2
WBGene00001080	SE:V:17941006-17943129:17946540-17947020:-	-0.133279	0.0674326	SE	down	dpy-21
WBGene00201469	SE:V:17941006-17943129:17946540-17947020:-	-0.133279	0.0674326	SE	down	Y59A8B.36
WBGene00001173	AF:IV:1848071:1848226-1860836:1858557:1858619-1860836:+	0.099495	0.0874126	AF	up	egl-4
WBGene00001208	A5:II:5938685-5938738:5938664-5938738:+	0.189018	0.037962	A5	up	egl-44
WBGene00173618	A5:II:5938685-5938738:5938664-5938738:+	0.189018	0.037962	A5	up	21ur-12994
WBGene00001208	AF:II:5928802:5928871-5936441:5933537:5933581-5936441:+	0.502899	0.037962	AF	up	egl-44
WBGene00173618	AF:II:5928802:5928871-5936441:5933537:5933581-5936441:+	0.502899	0.037962	AF	up	21ur-12994
WBGene00001248	AF:V:20768984-20769072:20769144:20768984-20770051:20770161:-	0.325485	0.0609391	AF	up	elp-1
WBGene00001333	AF:I:5290518-5290618:5290694:5290518-5291494:5291604:-	0.0599961	0.0304695	AF	up	erm-1
WBGene00001479	A5:V:13606506-13606550:13606506-13606554:-	-0.138509	0.0364635	A5	down	fmo-4
WBGene00001485	A3:V:20082318-20083097:20082309-20083097:-	-0.0722141	0.0909091	A3	down	fre-1
WBGene00001553	A3:V:11999531-11999730:11999525-11999730:-	-1	0	A3	down	gcy-33
WBGene00165148	A3:V:11999531-11999730:11999525-11999730:-	-1	0	A3	down	21ur-14066
WBGene00001851	A3:V:20784065-20784136:20784065-20784142:+	-0.109938	0.033966	A3	down	hif-1
WBGene00002053	AF:II:5765618:5765774-5769099:5768945:5769000-5769099:+	0.0586809	0.0654346	AF	up	ifb-1
WBGene00002054	SE:II:5752721-5752817:5752867-5753455:+	0.0977097	0.023976	SE	up	ifb-2
WBGene00002096	RI:II:5545266:5545403-5545720:5545865:-	-0.134368	0.0899101	RI	down	ins-13
WBGene00015894	RI:II:5545266:5545403-5545720:5545865:-	-0.134368	0.0899101	RI	down	acdh-2
WBGene00002136	A3:I:7350606-7350651:7350600-7350651:-	0.0760469	0.0374625	A3	up	inx-14
WBGene00002280	MX:X:16386215-16386613:16386723-16386982:16386215-16386754:16386861-16386982:-	-0.0779385	0.012987	MX	down	let-2
WBGene00199519	MX:X:16386215-16386613:16386723-16386982:16386215-16386754:16386861-16386982:-	-0.0779385	0.012987	MX	down	F01G12.14
WBGene00196350	MX:X:16386215-16386613:16386723-16386982:16386215-16386754:16386861-16386982:-	-0.0779385	0.012987	MX	down	F01G12.10
WBGene00002879	AF:III:7951601-7951852:7951916:7951601-7953222:7953308:-	0.119288	0.0794206	AF	up	let-754
WBGene00003060	A3:I:3580765-3581847:3580759-3581847:-	-0.132415	0.0644356	A3	down	lpd-3
WBGene00200878	A3:I:3580765-3581847:3580759-3581847:-	-0.132415	0.0644356	A3	down	Y47G6A.35
WBGene00003060	A3:I:3598762-3598810:3598756-3598810:-	-0.187852	0.0644356	A3	down	lpd-3
WBGene00200878	A3:I:3598762-3598810:3598756-3598810:-	-0.187852	0.0644356	A3	down	Y47G6A.35
WBGene00003151	AF:IV:9631318-9632018:9632111:9631318-9634765:9634948:-	0.0983797	0.0889111	AF	up	mca-1
WBGene00003406	A3:III:12873031-12873952:12873025-12873952:-	0.0366202	0.0659341	A3	up	mrg-1
WBGene00003630	AF:X:2594003:2594109-2600806:2599408:2599489-2600806:+	-0.130005	0.0924076	AF	down	nhr-40
WBGene00303074	AF:X:2594003:2594109-2600806:2599408:2599489-2600806:+	-0.130005	0.0924076	AF	down	T03G6.7
WBGene00003646	A5:V:2220800-2220848:2220796-2220848:+	-0.38022	0.048951	A5	down	nhr-56
WBGene00003656	A3:IV:8229068-8229249:8229062-8229249:-	-0.0922086	0.0354645	A3	down	nhr-66
WBGene00200918	A3:IV:8229068-8229249:8229062-8229249:-	-0.0922086	0.0354645	A3	down	T09A12.6
WBGene00003711	A3:III:2449865-2449913:2449859-2449913:-	-0.188348	0.0859141	A3	down	nhr-121
WBGene00003731	AF:V:7543736-7543796:7544021:7543736-7544752:7544838:-	0.300085	0.0794206	AF	up	nhx-3
WBGene00003933	A3:X:16537940-16537996:16537940-16538002:+	-0.492065	0.0504496	A3	down	pat-9
WBGene00004093	RI:I:4186547:4186681-4186770:4187023:+	0.210548	0.0959041	RI	up	ppw-1
WBGene00004095	RI:III:5314169:5315769-5315809:5316045:+	0.222142	0.0649351	RI	up	pqe-1
WBGene00004095	RI:III:5314169:5316045-5316095:5316271:+	-0.204824	0.0649351	RI	down	pqe-1
WBGene00004119	A3:V:9109678-9109759:9109678-9109801:+	-0.2312	0.02997	A3	down	pqn-31
WBGene00004131	AF:I:5376341-5377303:5377438:5376341-5379733:5380032:-	0.44594	0.0434565	AF	up	pqn-44
WBGene00004131	AF:I:5376341-5379733:5380032:5376341-5384422:5384508:-	-0.108744	0.0576923	AF	down	pqn-44
WBGene00004138	RI:V:12064091:12064480-12064863:12064919:-	0.0504642	0.0704296	RI	up	pqn-53
WBGene00220036	RI:V:12064091:12064480-12064863:12064919:-	0.0504642	0.0704296	RI	up	R07B7.20
WBGene00004213	AF:III:3595222:3595253-3604815:3599136:3599334-3604815:+	0.284061	0.0784216	AF	up	ptp-1
WBGene00004336	AF:V:14830317-14830761:14831027:14830317-14831419:14831621:-	0.0677126	0.0799201	AF	up	ret-1
WBGene00220121	AF:V:14830317-14830761:14831027:14830317-14831419:14831621:-	0.0677126	0.0799201	AF	up	W06A7.12
WBGene00004373	AF:V:6210685:6211152-6214827:6214689:6214748-6214827:+	0.251646	0.035964	AF	up	rme-1
WBGene00004781	A3:III:6451774-6451821:6451766-6451821:-	-0.0417013	0.0914086	A3	down	set-1
WBGene00004831	AF:X:11399542-11400574:11400993:11399542-11401461:11401561:-	-0.351289	0.0932401	AF	down	slo-2
WBGene00199447	AF:X:11399542-11400574:11400993:11399542-11401461:11401561:-	-0.351289	0.0932401	AF	down	F08B12.10
WBGene00004831	AF:X:11399542-11401204:11401307:11399542-11401461:11401561:-	-0.328521	0.0769231	AF	down	slo-2
WBGene00199447	AF:X:11399542-11401204:11401307:11399542-11401461:11401561:-	-0.328521	0.0769231	AF	down	F08B12.10
WBGene00004831	SE:X:11394996-11395185:11395220-11395267:-	-0.301477	0.0769231	SE	down	slo-2
WBGene00199447	SE:X:11394996-11395185:11395220-11395267:-	-0.301477	0.0769231	SE	down	F08B12.10
WBGene00004895	AF:I:13004437:13004501-13011591:13011462:13011500-13011591:+	0.13558	0.0944056	AF	up	smu-1
WBGene00004063	AF:I:13004437:13004501-13011591:13011462:13011500-13011591:+	0.13558	0.0944056	AF	up	pmr-1
WBGene00005007	A3:IV:8891972-8892046:8891972-8892049:+	0.0431087	0.0659341	A3	up	spr-2
WBGene00005008	A3:X:4514158-4514209:4514158-4514212:+	0.152394	0.0509491	A3	up	spr-3
WBGene00006407	AF:I:9195124-9198809:9199311:9195124-9205587:9205732:-	-0.330585	0.040959	AF	down	lim-9
WBGene00006410	A3:X:4150266-4150308:4150260-4150308:-	-0.11677	0.0599401	A3	down	nck-1
WBGene00006434	AF:II:5378195:5378206-5378842:5378423:5378440-5378842:+	0.076895	0.0104895	AF	up	prdx-2
WBGene00006437	A3:V:6264972-6265037:6264966-6265037:-	0.0687936	0.0974026	A3	up	mrck-1
WBGene00006599	SE:IV:92077-92622:92651-92804:+	-0.333333	0.0664336	SE	down	tpa-1
WBGene00006617	AF:II:11694077-11694144:11694293:11694077-11695557:11695657:-	0.065074	0.0724276	AF	up	tars-1
WBGene00006648	AL:V:163364-163413:163660:163364-166568:166870:+	0.576452	0.00699301	AL	up	ttb-1
WBGene00006650	RI:X:1504131:1504422-1504475:1504841:-	-0.552541	0	RI	down	tts-1
WBGene00006732	A5:I:9311114-9311375:9311000-9311375:+	0.0867067	0.0614386	A5	up	uev-3
WBGene00006754	RI:I:7376604:7376821-7376887:7377321:-	0.205789	0.000499501	RI	up	unc-15
WBGene00006870	AF:X:10515424:10515445-10516371:10516003:10516110-10516371:+	0.393198	0.0764236	AF	up	vab-3
WBGene00199774	AF:X:10515424:10515445-10516371:10516003:10516110-10516371:+	0.393198	0.0764236	AF	up	F14F3.13
WBGene00200362	AF:X:10515424:10515445-10516371:10516003:10516110-10516371:+	0.393198	0.0764236	AF	up	F14F3.15
WBGene00199373	AF:X:10515424:10515445-10516371:10516003:10516110-10516371:+	0.393198	0.0764236	AF	up	F14F3.12
WBGene00196814	AF:X:10515424:10515445-10516371:10516003:10516110-10516371:+	0.393198	0.0764236	AF	up	F14F3.8
WBGene00006923	RI:II:5339075:5339966-5340035:5340247:+	-0.558666	0.0624376	RI	down	vhp-1
WBGene00219881	RI:II:5339075:5339966-5340035:5340247:+	-0.558666	0.0624376	RI	down	F08B1.8
WBGene00006941	A3:IV:9210676-9211244:9210676-9211251:+	-0.103951	0.0779221	A3	down	wnk-1
WBGene00007008	A3:III:8360596-8360725:8360596-8360734:+	-0.0806064	0.0344655	A3	down	rfp-1
WBGene00007010	SE:III:9960786-9961384:9961446-9961548:+	0.0924583	0.040959	SE	up	alx-1
WBGene00007016	A3:III:5832784-5832835:5832775-5832835:-	-0.0647034	0.0939061	A3	down	mdt-15
WBGene00303073	A3:III:5832784-5832835:5832775-5832835:-	-0.0647034	0.0939061	A3	down	R12B2.13
WBGene00007287	A3:X:13681355-13681399:13681355-13681411:+	0.142908	0.0659341	A3	up	gck-4
WBGene00007448	AF:IV:11164301-11164402:11164419:11164301-11164578:11164622:-	0.297634	0.041958	AF	up	C08F8.6
WBGene00219442	AF:IV:11164301-11164402:11164419:11164301-11164578:11164622:-	0.297634	0.041958	AF	up	C08F8.16
WBGene00007631	A3:III:4150811-4150870:4150769-4150870:-	0.740009	0.0809191	A3	up	wht-3
WBGene00007711	A3:I:10192587-10192634:10192582-10192634:-	-0.0806397	0.0649351	A3	down	lid-1
WBGene00007752	A3:IV:12665802-12666487:12665802-12666493:+	-0.134168	0.0909091	A3	down	wdfy-3
WBGene00303042	A3:IV:12665802-12666487:12665802-12666493:+	-0.134168	0.0909091	A3	down	C26H9A.4
WBGene00007752	A3:IV:12667390-12667988:12667390-12667994:+	-0.146777	0.0909091	A3	down	wdfy-3
WBGene00303042	A3:IV:12667390-12667988:12667390-12667994:+	-0.146777	0.0909091	A3	down	C26H9A.4
WBGene00007753	AF:V:12131457:12131528-12132948:12132184:12132256-12132948:+	0.666667	0.0114885	AF	up	C27A7.1
WBGene00007757	AF:V:12127316-12128864:12128939:12127316-12130749:12130788:-	-0.508877	0.032967	AF	down	C27A7.6
WBGene00196251	AF:V:12127316-12128864:12128939:12127316-12130749:12130788:-	-0.508877	0.032967	AF	down	C27A7.10
WBGene00007807	A3:V:15355085-15355135:15355085-15355237:+	-0.126142	0.020979	A3	down	C29F3.7
WBGene00008133	SE:I:12979141-12979893:12980015-12980420:+	0.171195	0.0414585	SE	up	efsc-1
WBGene00008134	SE:I:12979141-12979893:12980015-12980420:+	0.171195	0.0414585	SE	up	C47B2.9
WBGene00008582	AF:IV:12414294-12414598:12414714:12414294-12417489:12417586:-	-0.333333	0.0764236	AF	down	F08G5.3
WBGene00014315	AF:IV:12414294-12414598:12414714:12414294-12417489:12417586:-	-0.333333	0.0764236	AF	down	F08G5.t3
WBGene00014314	AF:IV:12414294-12414598:12414714:12414294-12417489:12417586:-	-0.333333	0.0764236	AF	down	F08G5.t2
WBGene00008582	AF:IV:12414294-12414598:12414781:12414294-12417489:12417580:-	0.42167	0.0764236	AF	up	F08G5.3
WBGene00014315	AF:IV:12414294-12414598:12414781:12414294-12417489:12417580:-	0.42167	0.0764236	AF	up	F08G5.t3
WBGene00014314	AF:IV:12414294-12414598:12414781:12414294-12417489:12417580:-	0.42167	0.0764236	AF	up	F08G5.t2
WBGene00008601	AF:X:13155478-13155581:13155809:13155478-13158413:13158543:-	0.32447	0.034965	AF	up	mob-2
WBGene00008624	AL:IV:13150552:13150781-13151986:13150804:13151107-13151986:-	-0.162336	0.0824176	AL	down	crld-1
WBGene00008774	A3:IV:11014828-11014871:11014822-11014871:-	-0.0899566	0.0384615	A3	down	F13H10.3
WBGene00008775	A3:IV:11018631-11018673:11018622-11018673:-	-0.0738612	0.044955	A3	down	mogs-1
WBGene00198693	A3:IV:11018631-11018673:11018622-11018673:-	-0.0738612	0.044955	A3	down	F13H10.10
WBGene00008999	AF:X:10187958-10188299:10188470:10187958-10194290:10194377:-	-0.252172	0.0899101	AF	down	myrf-2
WBGene00009018	A5:V:19256227-19256582:19256148-19256582:+	0.666667	0.0769231	A5	up	F21D9.4
WBGene00197143	A5:V:19256227-19256582:19256148-19256582:+	0.666667	0.0769231	A5	up	F21D9.10
WBGene00009259	RI:X:11512662:11512799-11512846:11517504:-	-0.40355	0.0874126	RI	down	hpo-34
WBGene00009330	A3:V:10895017-10895062:10895017-10895068:+	-0.0771646	0.0789211	A3	down	F32D8.5
WBGene00009385	A3:V:11610830-11610874:11610830-11610879:+	-0.0652804	0.047952	A3	down	sas-5
WBGene00009498	A3:I:9241059-9245688:9241050-9245688:-	-0.118973	0.037962	A3	down	tat-5
WBGene00009584	AF:V:9730106:9730166-9732515:9731370:9732237-9732515:+	0.130357	0.0164835	AF	up	drap-1
WBGene00196611	AF:V:9730106:9730166-9732515:9731370:9732237-9732515:+	0.130357	0.0164835	AF	up	F40F9.14
WBGene00009584	AF:V:9730106:9730166-9732515:9731959:9732237-9732515:+	-0.054163	0.0904096	AF	down	drap-1
WBGene00196611	AF:V:9730106:9730166-9732515:9731959:9732237-9732515:+	-0.054163	0.0904096	AF	down	F40F9.14
WBGene00009584	SE:V:9730166-9731959:9732237-9732515:+	0.11878	0.0164835	SE	up	drap-1
WBGene00196611	SE:V:9730166-9731959:9732237-9732515:+	0.11878	0.0164835	SE	up	F40F9.14
WBGene00009678	A3:IV:10011292-10011336:10011292-10011342:+	-0.418146	0.00699301	A3	down	magu-4
WBGene00009886	AF:X:9567022:9567094-9569379:9567252:9567428-9569379:+	-0.6986	0.0294705	AF	down	F49E2.2
WBGene00170615	AF:X:9567022:9567094-9569379:9567252:9567428-9569379:+	-0.6986	0.0294705	AF	down	21ur-15001
WBGene00009924	AF:IV:14077441:14077618-14080149:14078721:14078969-14080149:+	0.293707	0.0839161	AF	up	cfp-1
WBGene00009925	AF:IV:14077441:14077618-14080149:14078721:14078969-14080149:+	0.293707	0.0839161	AF	up	F52B11.2
WBGene00009974	A3:V:13785622-13785663:13785613-13785663:-	-0.0972549	0.031968	A3	down	F53C11.4
WBGene00010191	A5:V:11441125-11441187:11441109-11441187:+	0.283314	0.0874126	A5	up	dmsr-1
WBGene00010290	A3:V:11964396-11964712:11964390-11964712:-	-0.215982	0.0809191	A3	down	F58H1.7
WBGene00010507	A3:V:20381451-20381844:20381451-20381849:+	0.1013	0.0994006	A3	up	K02E2.6
WBGene00189975	A3:V:20381451-20381844:20381451-20381849:+	0.1013	0.0994006	A3	up	K02E2.12
WBGene00010681	A3:II:8746134-8746355:8746134-8746588:+	0.274998	0.00824176	A3	up	mak-1
WBGene00010681	SE:II:8746134-8746355:8746479-8746588:+	0.204712	0	SE	up	mak-1
WBGene00010727	AF:V:9583627:9583693-9586184:9584405:9584462-9586184:+	0.262477	0.0645604	AF	up	K09G1.1
WBGene00010727	AF:V:9584253:9584462-9586184:9585124:9585156-9586184:+	-0.254645	0.0645604	AF	down	K09G1.1
WBGene00010727	AF:V:9584405:9584462-9586184:9585124:9585156-9586184:+	-0.248369	0.0645604	AF	down	K09G1.1
WBGene00010727	AF:V:9586184:9586302-9589414:9589159:9589265-9589414:+	-0.122441	0.0645604	AF	down	K09G1.1
WBGene00010814	A3:III:3502067-3502135:3502060-3502135:-	-0.0651487	0.0739261	A3	down	M01F1.8
WBGene00010867	SE:V:13370636-13370772:13370852-13370948:-	0.227067	0.0234765	SE	up	tag-260
WBGene00010912	A3:II:10868442-10868643:10868436-10868643:-	0.101674	0.0499501	A3	up	gmps-1
WBGene00194808	A3:II:10868442-10868643:10868436-10868643:-	0.101674	0.0499501	A3	up	mir-2216
WBGene00011194	A3:V:13962727-13962771:13962727-13962777:+	-0.0832661	0.0564436	A3	down	R10D12.13
WBGene00011299	RI:III:9046053:9046411-9046498:9046585:-	-0.412497	0.0824176	RI	down	ikke-1
WBGene00011300	A3:III:9052377-9052422:9052371-9052422:-	0.189794	0.000999001	A3	up	R107.5
WBGene00011344	A3:I:8288004-8288049:8287995-8288049:-	-0.0594975	0.0989011	A3	down	T01G9.2
WBGene00011610	AF:X:177375:177495-178192:177807:177986-178192:+	-0.648952	0.0634366	AF	down	T08D2.5
WBGene00011609	AF:X:177375:177495-178192:177807:177986-178192:+	-0.648952	0.0634366	AF	down	T08D2.4
WBGene00011834	A3:V:11238966-11239249:11238959-11239249:-	0.0539175	0.0999001	A3	up	dvc-1
WBGene00011897	A5:V:10599473-10599517:10599470-10599517:+	0.0742366	0.0374625	A5	up	scpl-4
WBGene00011923	AF:II:8617244-8617288:8617380:8617244-8617472:8617616:-	-0.32288	0.0434565	AF	down	chhy-1
WBGene00012162	SE:X:10032566-10032612:10032677-10032897:+	0.501481	0.0859141	SE	up	sek-6
WBGene00012204	A3:II:11471769-11471958:11471763-11471958:-	0.0902005	0.0929071	A3	up	mfn-1
WBGene00012245	A3:V:12502232-12502564:12502232-12502570:+	0.059208	0.0599401	A3	up	rbm-25
WBGene00012274	AF:I:13033483:13033686-13035563:13035272:13035324-13035563:+	0.199256	0.0711788	AF	up	W05B5.1
WBGene00012274	AF:I:13033625:13033686-13035563:13035272:13035324-13035563:+	0.151722	0.0711788	AF	up	W05B5.1
WBGene00012277	A5:V:12659489-12659532:12659489-12659604:-	0.323849	0.0974026	A5	up	ccch-3
WBGene00012332	A5:II:13961129-13961230:13961129-13961266:-	0.716096	0.0124875	A5	up	rpi-1
WBGene00012390	AF:I:13756142-13756207:13756224:13756142-13756276:13756354:-	-0.180352	0.0829171	AF	down	gpap-1
WBGene00012428	AF:IV:9233091:9233117-9237240:9236982:9237056-9237240:+	-0.0761808	0.0789211	AF	down	Y11D7A.3
WBGene00012658	AF:III:10702525-10706570:10706806:10702525-10706956:10707002:-	0.195917	0.0869131	AF	up	Y39A1A.21
WBGene00012659	AF:III:10702525-10706570:10706806:10702525-10706956:10707002:-	0.195917	0.0869131	AF	up	Y39A1A.22
WBGene00012810	A5:V:19378585-19379280:19378552-19379280:+	-0.262564	0.0759241	A5	down	nceh-1
WBGene00012854	A3:V:20792300-20792344:20792297-20792344:-	-0.232159	0.0224775	A3	down	Y44A6D.3
WBGene00012857	A3:V:20917166-20917453:20917166-20917468:+	0.242304	0.0784216	A3	up	pbo-5
WBGene00198666	A3:V:20917166-20917453:20917166-20917468:+	0.242304	0.0784216	A3	up	cTel17.2
WBGene00012930	AF:III:11267016-11267183:11267691:11267016-11269917:11270024:-	0.173366	0.0554446	AF	up	obr-1
WBGene00012988	A3:II:13281513-13282572:13281507-13282572:-	-0.171627	0.045954	A3	down	ztf-22
WBGene00199755	A3:II:13281513-13282572:13281507-13282572:-	-0.171627	0.045954	A3	down	Y48C3A.22
WBGene00013232	SE:III:11906619-11906693:11906788-11906869:-	-0.109174	0.036963	SE	down	faah-4
WBGene00013676	A3:I:14474931-14476345:14474931-14476351:+	-0.0638664	0.0744256	A3	down	ekl-4
WBGene00013969	A5:I:14997493-14997544:14997469-14997544:+	0.251753	0.0794206	A5	up	tep-1
WBGene00013969	RI:I:15001274:15001388-15001575:15001682:+	0.178866	0.0794206	RI	up	tep-1
WBGene00015009	SE:I:4649101-4649179:4649325-4649611:-	0.0533347	0.0909091	SE	up	B0041.5
WBGene00303032	SE:I:4649101-4649179:4649325-4649611:-	0.0533347	0.0909091	SE	up	B0041.12
WBGene00015094	A3:I:5256580-5256823:5256577-5256823:-	0.112077	0.0979021	A3	up	B0261.6
WBGene00015128	AF:III:8693622:8693742-8697359:8696945:8697060-8697359:+	-0.144294	0.0529471	AF	down	B0303.7
WBGene00015434	A5:V:3368139-3368186:3368136-3368186:+	-0.202719	0.0769231	A5	down	C04E12.4
WBGene00015433	A5:V:3368139-3368186:3368136-3368186:+	-0.202719	0.0769231	A5	down	C04E12.2
WBGene00015471	A5:X:1125713-1125763:1125703-1125763:+	0.376763	0.021978	A5	up	lmp-2
WBGene00015526	A3:III:8616421-8616467:8616356-8616467:-	0.520079	0.0744256	A3	up	C06E1.11
WBGene00015577	A5:V:3505696-3506225:3505696-3506246:-	0.169585	0.0564436	A5	up	ugt-64
WBGene00015687	RI:I:6287427:6287767-6288925:6289340:+	-0.644877	0.026973	RI	down	chdp-1
WBGene00015695	A5:I:4721364-4721411:4721361-4721411:+	0.10297	0.0949051	A5	up	ugt-26
WBGene00016112	RI:II:5694653:5694832-5694987:5695237:+	0.077561	0.0779221	RI	up	C25H3.3
WBGene00016123	RI:II:5694653:5694832-5694987:5695237:+	0.077561	0.0779221	RI	up	C25H3.14
WBGene00016115	RI:II:5661194:5661313-5661710:5661781:+	-0.768371	0.0014985	RI	down	mdt-26
WBGene00016143	A5:III:4932529-4932574:4932521-4932574:+	0.371081	0.034965	A5	up	eri-9
WBGene00016907	A5:I:1833408-1833451:1833383-1833451:+	-0.1152	0.013986	A5	down	C53H9.2
WBGene00016907	RI:I:1833219:1833383-1833451:1833722:+	-0.113051	0.034965	RI	down	C53H9.2
WBGene00016907	RI:I:1833219:1833408-1833451:1833722:+	-0.0492454	0.0959041	RI	down	C53H9.2
WBGene00016907	RI:I:1834187:1834269-1834395:1834746:+	0.044522	0.0959041	RI	up	C53H9.2
WBGene00016978	RI:III:6346430:6346490-6346711:6347507:+	-0.173143	0.0354645	RI	down	C56G2.3
WBGene00303050	RI:III:6346430:6346490-6346711:6347507:+	-0.173143	0.0354645	RI	down	C56G2.22
WBGene00017013	A3:X:8908302-8908720:8908302-8908726:+	-0.577523	0.0889111	A3	down	ensh-1
WBGene00017437	A5:II:6262945-6263208:6262938-6263208:+	0.258743	0.0994006	A5	up	nmgp-1
WBGene00017444	A5:II:6262945-6263208:6262938-6263208:+	0.258743	0.0994006	A5	up	F13H8.12
WBGene00017451	RI:II:3359139:3359425-3359543:3359816:+	-0.293219	0.0544456	RI	down	lido-14
WBGene00017450	RI:II:3359139:3359425-3359543:3359816:+	-0.293219	0.0544456	RI	down	bath-27
WBGene00017553	SE:II:3405156-3405301:3405417-3405464:+	0.342072	0.0619381	SE	up	nep-8
WBGene00017641	RI:IV:7968509:7968604-7968674:7968961:+	-0.498667	0.0979021	RI	down	csr-1
WBGene00019019	RI:IV:7968509:7968604-7968674:7968961:+	-0.498667	0.0979021	RI	down	frpr-10
WBGene00019020	RI:IV:7968509:7968604-7968674:7968961:+	-0.498667	0.0979021	RI	down	F57H12.5
WBGene00017755	RI:III:6480235:6480342-6480566:6480755:+	0.253798	0.0729271	RI	up	zip-8
WBGene00017902	A3:IV:4567336-4567384:4567328-4567384:-	0.361309	0.0639361	A3	up	F28E10.4
WBGene00018637	A5:IV:7556067-7556114:7556067-7556118:-	0.0944752	0.0519481	A5	up	F49E8.6
WBGene00018638	A5:IV:7556067-7556114:7556067-7556118:-	0.0944752	0.0519481	A5	up	F49E8.7
WBGene00018661	A3:II:1923546-1923587:1923546-1923596:+	-0.394339	0.0799201	A3	down	F52C6.4
WBGene00018700	A3:V:8429369-8429809:8429363-8429809:-	0.0925014	0.0324675	A3	up	lmd-3
WBGene00219961	A3:V:8429369-8429809:8429363-8429809:-	0.0925014	0.0324675	A3	up	F52E1.17
WBGene00018700	AF:V:8434307-8438347:8438409:8434307-8444738:8444770:-	0.350724	0.0284715	AF	up	lmd-3
WBGene00219961	AF:V:8434307-8438347:8438409:8434307-8444738:8444770:-	0.350724	0.0284715	AF	up	F52E1.17
WBGene00018700	AF:V:8434307-8438347:8438409:8434307-8444738:8444806:-	0.159355	0.0324675	AF	up	lmd-3
WBGene00219961	AF:V:8434307-8438347:8438409:8434307-8444738:8444806:-	0.159355	0.0324675	AF	up	F52E1.17
WBGene00018903	A3:IV:7468227-7468272:7468221-7468272:-	-0.233891	0.0714286	A3	down	F55G1.7
WBGene00198357	A3:IV:7468227-7468272:7468221-7468272:-	-0.233891	0.0714286	A3	down	F55G1.19
WBGene00018957	AF:I:178524:178620-180600:180081:180465-180600:+	0.129118	0.0324675	AF	up	F56C11.5
WBGene00019120	A3:II:5632953-5633044:5632953-5633050:+	-0.0409174	0.0969031	A3	down	npl-4.1
WBGene00019121	A3:II:5624491-5624563:5624491-5624569:+	-0.0515077	0.0789211	A3	down	npl-4.2
WBGene00019129	A3:II:5907067-5907110:5907067-5907119:+	0.099298	0.0524476	A3	up	F59G1.8
WBGene00019166	SE:IV:4828111-4828527:4828644-4828751:-	-0.396429	0.0949051	SE	down	tat-2
WBGene00173774	SE:IV:4828111-4828527:4828644-4828751:-	-0.396429	0.0949051	SE	down	21ur-8301
WBGene00166509	SE:IV:4828111-4828527:4828644-4828751:-	-0.396429	0.0949051	SE	down	21ur-10447
WBGene00167794	SE:IV:4828111-4828527:4828644-4828751:-	-0.396429	0.0949051	SE	down	21ur-9878
WBGene00168841	SE:IV:4828111-4828527:4828644-4828751:-	-0.396429	0.0949051	SE	down	21ur-8392
WBGene00172114	SE:IV:4828111-4828527:4828644-4828751:-	-0.396429	0.0949051	SE	down	21ur-7555
WBGene00050520	SE:IV:4828111-4828527:4828644-4828751:-	-0.396429	0.0949051	SE	down	21ur-3256
WBGene00047154	SE:IV:4828111-4828527:4828644-4828751:-	-0.396429	0.0949051	SE	down	21ur-3648
WBGene00168098	SE:IV:4828111-4828527:4828644-4828751:-	-0.396429	0.0949051	SE	down	21ur-7652
WBGene00172115	SE:IV:4828111-4828527:4828644-4828751:-	-0.396429	0.0949051	SE	down	21ur-9255
WBGene00046378	SE:IV:4828111-4828527:4828644-4828751:-	-0.396429	0.0949051	SE	down	21ur-1103
WBGene00165624	SE:IV:4828111-4828527:4828644-4828751:-	-0.396429	0.0949051	SE	down	21ur-8591
WBGene00167376	SE:IV:4828111-4828527:4828644-4828751:-	-0.396429	0.0949051	SE	down	21ur-13380
WBGene00049216	SE:IV:4828111-4828527:4828644-4828751:-	-0.396429	0.0949051	SE	down	21ur-5006
WBGene00047386	SE:IV:4828111-4828527:4828644-4828751:-	-0.396429	0.0949051	SE	down	21ur-1855
WBGene00168352	SE:IV:4828111-4828527:4828644-4828751:-	-0.396429	0.0949051	SE	down	21ur-14292
WBGene00167432	SE:IV:4828111-4828527:4828644-4828751:-	-0.396429	0.0949051	SE	down	21ur-7492
WBGene00166370	SE:IV:4828111-4828527:4828644-4828751:-	-0.396429	0.0949051	SE	down	21ur-9573
WBGene00174046	SE:IV:4828111-4828527:4828644-4828751:-	-0.396429	0.0949051	SE	down	21ur-9232
WBGene00170716	SE:IV:4828111-4828527:4828644-4828751:-	-0.396429	0.0949051	SE	down	21ur-6167
WBGene00049350	SE:IV:4828111-4828527:4828644-4828751:-	-0.396429	0.0949051	SE	down	21ur-5162
WBGene00171122	SE:IV:4828111-4828527:4828644-4828751:-	-0.396429	0.0949051	SE	down	21ur-10569
WBGene00174345	SE:IV:4828111-4828527:4828644-4828751:-	-0.396429	0.0949051	SE	down	21ur-8678
WBGene00019211	AF:X:17627975-17628182:17628246:17627975-17640721:17640871:-	0.523785	0.0604396	AF	up	H18N23.2
WBGene00019270	AF:II:5845777:5845881-5847746:5846633:5846707-5847746:+	-0.582618	0.0574426	AF	down	H41C03.3
WBGene00019341	AF:II:2529255-2537267:2537357:2529255-2537765:2537854:-	0.333333	0.0234765	AF	up	K02F6.7
WBGene00019342	AF:II:2529255-2537267:2537357:2529255-2537765:2537854:-	0.333333	0.0234765	AF	up	K02F6.8
WBGene00019408	A5:II:5783929-5784061:5783923-5784061:+	-0.334307	0.0694306	A5	down	K05F1.6
WBGene00019466	A3:V:9343567-9343676:9343416-9343676:-	0.0612165	0.0779221	A3	up	tos-1
WBGene00019466	RI:V:9343676:9343796-9343946:9344129:-	-0.314824	0	RI	down	tos-1
WBGene00019466	SE:V:9343416-9343501:9343567-9343676:-	0.246032	0	SE	up	tos-1
WBGene00019713	SE:I:5569199-5569545:5569568-5569705:-	-0.0418194	0.038961	SE	down	pqn-52
WBGene00019760	RI:X:4970045:4970591-4970644:4970747:-	-0.028474	0.0884116	RI	down	calu-1
WBGene00019793	SE:II:3641702-3641938:3642147-3642202:+	1	0	SE	up	M151.1
WBGene00019806	A3:V:6048680-6048883:6048669-6048883:-	-0.0761837	0.0859141	A3	down	R01B10.4
WBGene00019807	A3:V:6048680-6048883:6048669-6048883:-	-0.0761837	0.0859141	A3	down	jamp-1
WBGene00020169	A5:II:7101067-7101111:7101067-7101115:-	-0.0479477	0.0869131	A5	down	mmaa-1
WBGene00020299	AF:IV:410867:410995-414241:413736:413890-414241:+	0.363491	0.0839161	AF	up	T07A9.12
WBGene00020317	A3:III:6911066-6912110:6911060-6912110:-	0.152766	0.026973	A3	up	pdf-1
WBGene00020549	A3:III:6116174-6116217:6116168-6116217:-	-0.0353919	0.0969031	A3	down	nmt-1
WBGene00020740	A3:II:1164337-1164432:1164337-1164441:+	-0.163827	0.0684316	A3	down	T23F4.2
WBGene00020762	SE:III:882058-882106:882212-883591:-	0.0730048	0.0969031	SE	up	zer-1
WBGene00021249	AF:III:1633367-1633727:1633792:1633367-1634305:1634370:-	0.666667	0.0134865	AF	up	Y22D7AL.11
WBGene00021395	AF:IV:184484:184709-189486:186254:186431-189486:+	-0.2359	0.0504496	AF	down	pnc-1
WBGene00196851	AF:IV:184484:184709-189486:186254:186431-189486:+	-0.2359	0.0504496	AF	down	Y38C1AA.15
WBGene00021610	A5:V:1626328-1626736:1626328-1626740:-	0.457051	0.0744256	A5	up	nhr-237
WBGene00021765	SE:I:1935005-1938399:1938917-1941131:+	0.0978273	0.0704296	SE	up	Y51F10.4
WBGene00021810	A3:III:3323007-3323058:3323007-3323075:+	0.11298	0.0644356	A3	up	phf-15
WBGene00022019	A3:V:4562942-4564367:4562936-4564367:-	0.0581178	0.0869131	A3	up	sut-2
WBGene00022073	SE:IV:3085118-3086123:3086293-3086562:-	0.52566	0.0784216	SE	up	Y67D8C.9
WBGene00202403	SE:IV:3085118-3086123:3086293-3086562:-	0.52566	0.0784216	SE	up	Y67D8C.21
WBGene00201574	SE:IV:3085118-3086123:3086293-3086562:-	0.52566	0.0784216	SE	up	Y67D8C.20
WBGene00197397	SE:IV:3085118-3086123:3086293-3086562:-	0.52566	0.0784216	SE	up	Y67D8C.14
WBGene00022205	A5:X:90343-90988:90343-90997:-	-0.363574	0.0774226	A5	down	Y73B3A.3
WBGene00198345	A5:X:90343-90988:90343-90997:-	-0.363574	0.0774226	A5	down	Y73B3A.25
WBGene00199279	A5:X:90343-90988:90343-90997:-	-0.363574	0.0774226	A5	down	Y73B3A.26
WBGene00201780	A5:X:90343-90988:90343-90997:-	-0.363574	0.0774226	A5	down	Y73B3A.29
WBGene00022314	RI:IV:1406567:1406608-1406660:1406806:+	-0.549296	0.047952	RI	down	Y77E11A.14
WBGene00023392	RI:IV:1406567:1406608-1406660:1406806:+	-0.549296	0.047952	RI	down	Y77E11A.t1
WBGene00022391	SE:I:917413-917914:917937-918779:-	-0.666667	0.0899101	SE	down	prhg-1
WBGene00022459	A3:I:5119686-5119730:5119686-5119737:+	-0.0957947	0.0989011	A3	down	Y110A7A.9
WBGene00022475	RI:I:4555877:4556015-4556063:4556163:-	-0.273291	0.0144855	RI	down	Y119C1B.10
WBGene00022596	A3:III:5270179-5270239:5270179-5270251:+	-0.526382	0.0274725	A3	down	ZC395.4
WBGene00022647	AF:X:17463912-17463971:17464087:17463912-17464810:17464901:-	-0.349824	0.030969	AF	down	slc-17.1
WBGene00022705	AL:IV:5315076-5315123:5315225:5315076-5315319:5315594:+	0.201926	0.0729271	AL	up	ZK354.2
WBGene00022781	A5:II:5280279-5282469:5280279-5282471:-	0.208376	0.011988	A5	up	pmt-1
WBGene00022781	AF:II:5280279-5282258:5282347:5280279-5282471:5282517:-	0.334614	0.031968	AF	up	pmt-1
WBGene00022855	RI:II:7046944:7048283-7048438:7048988:-	0.438135	0.0659341	RI	up	tcer-1
WBGene00044082	A5:V:14101861-14101910:14101852-14101910:+	0.0943725	0.0939061	A5	up	D1086.12
WBGene00044484	RI:IV:5045152:5045284-5045333:5045489:-	-0.477973	0.0929071	RI	down	hot-9
WBGene00166303	RI:IV:5045152:5045284-5045333:5045489:-	-0.477973	0.0929071	RI	down	21ur-13233
WBGene00165872	RI:IV:5045152:5045284-5045333:5045489:-	-0.477973	0.0929071	RI	down	21ur-6624
WBGene00173845	RI:IV:5045152:5045284-5045333:5045489:-	-0.477973	0.0929071	RI	down	21ur-10797
WBGene00167990	RI:IV:5045152:5045284-5045333:5045489:-	-0.477973	0.0929071	RI	down	21ur-10662
WBGene00169952	RI:IV:5045152:5045284-5045333:5045489:-	-0.477973	0.0929071	RI	down	21ur-11257
WBGene00047795	RI:IV:5045152:5045284-5045333:5045489:-	-0.477973	0.0929071	RI	down	21ur-3113
WBGene00174145	RI:IV:5045152:5045284-5045333:5045489:-	-0.477973	0.0929071	RI	down	21ur-6626
WBGene00167714	RI:IV:5045152:5045284-5045333:5045489:-	-0.477973	0.0929071	RI	down	21ur-15004
WBGene00045291	RI:X:14414178:14414797-14414856:14415014:-	-0.249061	0.0959041	RI	down	F23D12.10
WBGene00077712	RI:V:7870585:7870715-7870756:7870807:-	-0.259765	0.0929071	RI	down	nipi-4
WBGene00195070	A5:II:3452204-3452250:3452194-3452250:+	0.354592	0.0756743	A5	up	C16C8.20
WBGene00015851	A5:II:3452204-3452250:3452194-3452250:+	0.354592	0.0756743	A5	up	C16C8.13
WBGene00195071	A5:II:3452204-3452250:3452194-3452250:+	0.354592	0.0756743	A5	up	C16C8.21
WBGene00305092	A5:II:3452204-3452250:3452194-3452250:+	0.354592	0.0756743	A5	up	NA
WBGene00015852	A5:II:3452204-3452250:3452194-3452250:+	0.354592	0.0756743	A5	up	C16C8.14
WBGene00195070	RI:II:3451548:3452194-3452250:3452411:+	0.314396	0.0756743	RI	up	C16C8.20
WBGene00015851	RI:II:3451548:3452194-3452250:3452411:+	0.314396	0.0756743	RI	up	C16C8.13
WBGene00195071	RI:II:3451548:3452194-3452250:3452411:+	0.314396	0.0756743	RI	up	C16C8.21
WBGene00305092	RI:II:3451548:3452194-3452250:3452411:+	0.314396	0.0756743	RI	up	NA
WBGene00015852	RI:II:3451548:3452194-3452250:3452411:+	0.314396	0.0756743	RI	up	C16C8.14
WBGene00195070	RI:II:3451548:3452204-3452250:3452411:+	-0.234778	0.0794206	RI	down	C16C8.20
WBGene00015851	RI:II:3451548:3452204-3452250:3452411:+	-0.234778	0.0794206	RI	down	C16C8.13
WBGene00195071	RI:II:3451548:3452204-3452250:3452411:+	-0.234778	0.0794206	RI	down	C16C8.21
WBGene00305092	RI:II:3451548:3452204-3452250:3452411:+	-0.234778	0.0794206	RI	down	NA
WBGene00015852	RI:II:3451548:3452204-3452250:3452411:+	-0.234778	0.0794206	RI	down	C16C8.14
WBGene00195147	AF:II:8420098:8420157-8420757:8420179:8420478-8420757:+	0.407979	0.0949051	AF	up	F14E5.8
WBGene00303000	A3:V:7855898-7855944:7855898-7855954:+	0.0723445	0.023976	A3	up	C37C3.18
WBGene00016496	A3:V:7855898-7855944:7855898-7855954:+	0.0723445	0.023976	A3	up	C37C3.2
