# Supplementary material
Source: Research Square preprint supplement (doi:10.21203/rs.3.rs-7966420/v1)
Supplement: Supplementary file 3 [file 24a43fde365b0680c06986d7.xlsx]

## Sheet: N2_30mHS.vs.N2_Ctrl
gene.name	row	baseMean	log2FoldChange	lfcSE	stat	pvalue	padj
hsp-16.11	WBGene00002017	7342.58	8.78656	0.262302	33.4979	5.17975e-246	7.73078e-242
F44E5.5	WBGene00009692	36446.7	11.3428	0.40623	27.9222	1.43479e-171	1.07071e-167
F44E5.4	WBGene00009691	40050.9	11.5817	0.431638	26.8321	1.3655e-158	6.79338e-155
hsp-16.2	WBGene00002016	1543.62	8.89408	0.377531	23.5586	1.02529e-122	3.82562e-119
hsp-70	WBGene00002026	4430.11	10.5554	0.490511	21.5193	1.02703e-102	3.06568e-99
MTCE.7	WBGene00014454	4515.45	6.20642	0.314989	19.7036	2.00707e-86	4.99258e-83
hsp-16.41	WBGene00002018	1896.34	9.0919	0.472934	19.2245	2.31055e-82	4.92643e-79
asp-13	WBGene00017881	1409.2	-3.94989	0.219483	-17.9964	2.08022e-72	3.8809e-69
C30E1.9	WBGene00022951	5167.69	2.28109	0.132221	17.252	1.08024e-66	1.79139e-63
K06A4.7	WBGene00010597	217.172	-4.31367	0.253138	-17.0408	4.09303e-65	6.10885e-62
K02E11.15	WBGene00304182	101.652	5.98348	0.353543	16.9243	2.97646e-64	4.03852e-61
R107.5	WBGene00011300	3763.65	1.2617	0.0758367	16.6371	3.75492e-62	4.67018e-59
linc-6	WBGene00219700	100.773	3.5517	0.222907	15.9336	3.70646e-57	4.2553e-54
R11A5.3	WBGene00011231	954.125	3.27925	0.219302	14.9531	1.48556e-50	1.58371e-47
Y43F8B.2	WBGene00012813	1911.3	1.83796	0.148258	12.3971	2.7112e-35	2.69764e-32
unc-23	WBGene00006760	1024.63	1.50308	0.123539	12.1669	4.6668e-34	4.35325e-31
scp-1	WBGene00004744	1983.83	0.916824	0.0832961	11.0068	3.54335e-28	3.11086e-25
MTCE.33	WBGene00014472	1322.75	4.32998	0.418123	10.3558	3.93996e-25	3.09495e-22
hsp-110	WBGene00016250	17172.5	0.913584	0.0882161	10.3562	3.92194e-25	3.09495e-22
mans-2	WBGene00008258	566.83	-1.04147	0.104312	-9.98419	1.78757e-23	1.33397e-20
his-41	WBGene00001915	837.176	1.02402	0.106762	9.59157	8.67516e-22	6.16556e-19
his-24	WBGene00001898	1549.46	-2.2568	0.241286	-9.35322	8.50166e-21	5.7676e-18
C01B4.6	WBGene00015270	163.564	-20.3596	2.20356	-9.23941	2.47869e-20	1.60846e-17
B0410.3	WBGene00015172	155.407	-1.48882	0.165213	-9.01152	2.03215e-19	1.26375e-16
fbxb-72	WBGene00019243	52.5312	2.92574	0.325289	8.99427	2.37812e-19	1.41974e-16
tts-1	WBGene00006650	1697.55	1.49785	0.168271	8.9014	5.51484e-19	3.16573e-16
slc-25A29	WBGene00008320	80.6689	-1.82173	0.204939	-8.88914	6.15841e-19	3.40423e-16
hrg-7	WBGene00007605	1440.66	-1.01955	0.117622	-8.66798	4.39836e-18	2.34448e-15
hsp-16.1	WBGene00002015	379.548	11.8054	1.40502	8.40229	4.37868e-17	2.25351e-14
pqn-44	WBGene00004131	2770.16	1.0287	0.12396	8.29865	1.05303e-16	5.23881e-14
tyr-6	WBGene00022231	305.54	-1.1841	0.14468	-8.1843	2.73891e-16	1.31865e-13
pept-1	WBGene00003877	1660.62	-0.837393	0.102677	-8.15564	3.47323e-16	1.61994e-13
wah-1	WBGene00006937	2204.55	0.468454	0.0575437	8.14084	3.92534e-16	1.77532e-13
Y82E9BR.17	WBGene00022349	158.609	-2.75409	0.341788	-8.0579	7.76152e-16	3.40708e-13
F41C3.2	WBGene00018268	180.142	4.6956	0.593982	7.90528	2.67323e-15	1.13994e-12
ZK512.7	WBGene00013986	780.404	-1.14854	0.145861	-7.87422	3.42873e-15	1.42149e-12
sta-2	WBGene00010251	102.343	-1.57427	0.200184	-7.86412	3.71711e-15	1.4994e-12
nurf-1	WBGene00009180	7425.63	0.681923	0.0870359	7.83496	4.68977e-15	1.84197e-12
hsp-16.48	WBGene00002019	2932.46	9.31812	1.19163	7.81965	5.29703e-15	2.02713e-12
elo-5	WBGene00001243	2283.28	-0.875659	0.112564	-7.77922	7.29731e-15	2.72281e-12
F32H5.3	WBGene00009349	37.4443	-3.15989	0.407561	-7.75317	8.96283e-15	3.26269e-12
pdha-1	WBGene00011510	7136.6	0.271487	0.0352086	7.71081	1.25022e-14	4.33943e-12
R09B5.11	WBGene00019979	75.5293	-1.69293	0.219471	-7.71369	1.22228e-14	4.33943e-12
fut-8	WBGene00001508	156.666	-1.27848	0.166438	-7.68143	1.57319e-14	5.33633e-12
skr-10	WBGene00004816	104.763	-2.00081	0.263488	-7.59356	3.11229e-14	1.03224e-11
#N/A	WBGene00304813	100.61	2.00927	0.265293	7.57379	3.62497e-14	1.17615e-11
Y57A10A.5	WBGene00013250	594.7	0.652278	0.0863553	7.55341	4.23998e-14	1.34642e-11
F10E7.9	WBGene00017350	98.6124	-1.6587	0.221148	-7.50042	6.36143e-14	1.97801e-11
ttll-12	WBGene00008405	2642.85	0.568969	0.0766077	7.42705	1.1105e-13	3.3825e-11
F16C3.2	WBGene00008886	46.551	-2.00409	0.270158	-7.41821	1.18711e-13	3.54351e-11
oac-46	WBGene00011768	243.693	-1.19405	0.161242	-7.40534	1.30818e-13	3.82835e-11
C26D10.6	WBGene00007746	135.346	-1.12156	0.153221	-7.3199	2.4816e-13	7.12267e-11
vglu-2	WBGene00010755	349.595	-1.06897	0.14776	-7.23454	4.67115e-13	1.31541e-10
Y38H6C.8	WBGene00012621	67.0712	3.75493	0.520213	7.21806	5.27339e-13	1.45751e-10
F22E5.1	WBGene00017703	209.136	-1.34856	0.187571	-7.1896	6.49793e-13	1.7633e-10
fil-2	WBGene00019668	62.216	7.43903	1.03592	7.18106	6.91728e-13	1.84358e-10
Y71A12B.11	WBGene00013508	108.548	-2.23142	0.312145	-7.14865	8.76382e-13	2.29474e-10
skpo-1	WBGene00009897	6250.97	0.330859	0.0466147	7.09773	1.2682e-12	3.26342e-10
hsp-90	WBGene00000915	64395.5	0.372954	0.0526931	7.07785	1.4641e-12	3.70368e-10
Y42G9A.3	WBGene00021533	110.332	-1.46676	0.209007	-7.01773	2.25505e-12	5.60943e-10
epg-2	WBGene00021468	1118.05	-1.59556	0.22787	-7.00206	2.52224e-12	6.17121e-10
elo-6	WBGene00001244	3259.93	-0.97639	0.139647	-6.99185	2.71284e-12	6.5305e-10
dnj-13	WBGene00001031	5307.86	0.523254	0.0748891	6.98705	2.80718e-12	6.65034e-10
oat-1	WBGene00003837	147.035	-1.33784	0.191862	-6.97291	3.10462e-12	7.24007e-10
Y54E10A.10	WBGene00021830	1378.38	0.49543	0.0712021	6.95808	3.44941e-12	7.92038e-10
F59C12.4	WBGene00045272	92.8874	1.86653	0.269198	6.93367	4.10057e-12	9.27288e-10
rpr-1	WBGene00045238	46.47	8.44496	1.21847	6.93078	4.1853e-12	9.32322e-10
cec-8	WBGene00021913	243.083	-2.07196	0.299605	-6.91564	4.65762e-12	1.02228e-09
vet-1	WBGene00020261	235.524	-1.54147	0.223065	-6.91042	4.83228e-12	1.04524e-09
F13B6.3	WBGene00017418	102.269	-1.26889	0.18375	-6.90552	5.00204e-12	1.06651e-09
F56G4.6	WBGene00010161	687.382	0.517289	0.0749524	6.90156	5.14341e-12	1.0812e-09
bli-1	WBGene00000251	56.7272	2.67354	0.388399	6.88349	5.84057e-12	1.2107e-09
Y45F10D.7	WBGene00012887	1714.41	0.687026	0.100046	6.86712	6.551e-12	1.33937e-09
B0361.9	WBGene00015163	260.776	-0.841779	0.122951	-6.84646	7.56989e-12	1.52676e-09
mak-1	WBGene00010681	2638.76	-0.572056	0.0843251	-6.78394	1.1694e-11	2.3271e-09
T05D4.2	WBGene00011475	98.1995	-2.13345	0.316428	-6.74228	1.55916e-11	3.0619e-09
kreg-1	WBGene00018725	138.953	3.39472	0.504536	6.72841	1.71533e-11	3.32484e-09
ZC262.7	WBGene00043948	63.3698	2.52613	0.377791	6.6866	2.28418e-11	4.37069e-09
sdz-33	WBGene00013233	54.841	-2.49983	0.374434	-6.67629	2.4506e-11	4.62978e-09
eif-2A	WBGene00008480	8484.78	0.2622	0.0393253	6.66747	2.60254e-11	4.85536e-09
ugt-16	WBGene00013901	62.4997	-1.49809	0.225954	-6.63006	3.35561e-11	6.18303e-09
ddb-1	WBGene00010890	2932.31	0.569482	0.0859499	6.62575	3.45493e-11	6.28839e-09
mrpl-45	WBGene00022493	1198.79	0.511239	0.0772588	6.61723	3.65991e-11	6.58122e-09
syd-9	WBGene00044068	209.8	-1.73311	0.263632	-6.57399	4.89859e-11	8.70374e-09
btb-8	WBGene00018437	50.5547	-2.73499	0.416719	-6.56314	5.26864e-11	9.25112e-09
CD4.8	WBGene00016993	442.309	0.611092	0.0931871	6.55769	5.46465e-11	9.48371e-09
Y19D10A.16	WBGene00044734	99.1365	24.1623	3.6881	6.55143	5.699e-11	9.77673e-09
W03F9.1	WBGene00020999	3252.59	0.777246	0.119826	6.48646	8.78766e-11	1.49041e-08
M117.1	WBGene00010918	284.007	-1.01291	0.156406	-6.47618	9.40744e-11	1.5776e-08
unc-120	WBGene00006844	204.174	-1.04987	0.162538	-6.45921	1.05248e-10	1.74536e-08
nlp-14	WBGene00003752	105.223	-1.2307	0.191239	-6.43543	1.23121e-10	2.01933e-08
F57A8.9	WBGene00197215	18.8082	7.92603	1.23273	6.42964	1.27908e-10	2.07503e-08
zip-8	WBGene00017755	162.489	-2.01913	0.315081	-6.40828	1.47168e-10	2.36182e-08
dsl-2	WBGene00001104	161.139	-1.55522	0.244033	-6.373	1.85361e-10	2.94309e-08
C08F1.10	WBGene00015613	104.829	-2.7426	0.430909	-6.36468	1.95695e-10	3.07448e-08
npp-12	WBGene00003798	7942.25	0.448857	0.0705519	6.36208	1.99045e-10	3.09453e-08
cav-1	WBGene00000301	1456.85	-1.43011	0.227438	-6.28791	3.21759e-10	4.95078e-08
scd-2	WBGene00004740	52.1922	-1.87552	0.299157	-6.26935	3.62553e-10	5.52153e-08
M106.3	WBGene00010911	2252.08	0.401511	0.0640799	6.26579	3.70949e-10	5.59234e-08
rars-1	WBGene00004679	4884.84	0.255521	0.0408011	6.26259	3.7863e-10	5.65105e-08
sdz-30	WBGene00011432	182.06	-1.78594	0.28649	-6.23388	4.55019e-10	6.72392e-08
cht-1	WBGene00000503	897.345	-1.58485	0.254601	-6.22484	4.82042e-10	7.0534e-08
dos-1	WBGene00013980	42.3052	-1.92454	0.30971	-6.214	5.16528e-10	7.48464e-08
C49F5.6	WBGene00008210	1272.72	0.530466	0.0854819	6.2056	5.44901e-10	7.81985e-08
K02F2.11	WBGene00220000	17.4315	4.06614	0.656081	6.19762	5.73238e-10	8.14817e-08
nol-6	WBGene00021789	992.782	0.83305	0.135005	6.1705	6.80756e-10	9.58517e-08
M142.5	WBGene00010922	861.158	0.480228	0.0781011	6.1488	7.8071e-10	1.08898e-07
C13G3.1	WBGene00007553	129.55	1.05152	0.171268	6.13963	8.27159e-10	1.14309e-07
ZK430.5	WBGene00022741	56.1623	-1.98997	0.324731	-6.12805	8.89626e-10	1.21813e-07
cth-2	WBGene00022856	2700.92	-0.859336	0.140305	-6.12477	9.08159e-10	1.23221e-07
C55B7.3	WBGene00016942	332.928	1.41655	0.231521	6.11843	9.45001e-10	1.27064e-07
his-66	WBGene00001940	68.8672	-19.4758	3.18996	-6.10534	1.02584e-09	1.36703e-07
T02E9.5	WBGene00011383	215.786	-2.06293	0.338692	-6.09088	1.12295e-09	1.48319e-07
srt-42	WBGene00021599	34.1152	4.31848	0.709431	6.08724	1.14873e-09	1.50393e-07
F46C5.10	WBGene00009785	70.8297	-1.60914	0.26442	-6.08555	1.16095e-09	1.50671e-07
lon-1	WBGene00003055	1514.86	-0.701476	0.115986	-6.04794	1.46706e-09	1.88757e-07
Y111B2A.12	WBGene00013735	1927.83	0.609547	0.10096	6.03748	1.56536e-09	1.99684e-07
T01D3.6	WBGene00011330	545.546	-1.05625	0.175278	-6.02616	1.67901e-09	2.12367e-07
ugt-13	WBGene00019232	233.737	-1.47197	0.244592	-6.01805	1.76532e-09	2.21407e-07
his-35	WBGene00001909	666.892	0.649342	0.108167	6.00315	1.9352e-09	2.4069e-07
skr-8	WBGene00004814	115.608	-1.83208	0.30533	-6.00032	1.96929e-09	2.42906e-07
C08H9.15	WBGene00007474	187.323	-1.02599	0.171282	-5.99009	2.09731e-09	2.56576e-07
C01B10.11	WBGene00044294	479.999	-0.648878	0.108536	-5.97847	2.25249e-09	2.7332e-07
hsp-16.49	WBGene00002020	2243.81	7.70431	1.29005	5.9721	2.34217e-09	2.8191e-07
Y37E11B.5	WBGene00021377	699.254	0.662219	0.110934	5.96947	2.38019e-09	2.84195e-07
clec-266	WBGene00016088	506.062	-1.70901	0.287199	-5.95062	2.67132e-09	3.16424e-07
fbxb-104	WBGene00021719	31.2317	-2.99341	0.504924	-5.92844	3.05825e-09	3.59405e-07
prp-19	WBGene00020423	4920.81	0.302725	0.0511634	5.91682	3.28224e-09	3.82715e-07
F48E3.6	WBGene00018606	64.0034	-2.19444	0.371088	-5.91353	3.34859e-09	3.87424e-07
plp-1	WBGene00004046	6555.83	0.25062	0.0423939	5.91169	3.38613e-09	3.88754e-07
pho-1	WBGene00004020	687.161	-0.682134	0.115838	-5.8887	3.89252e-09	4.4348e-07
hmg-11	WBGene00001976	271.04	-1.40798	0.239383	-5.88172	4.06027e-09	4.59088e-07
vps-34	WBGene00006932	1281.21	0.375274	0.06399	5.86457	4.50304e-09	5.05322e-07
vars-1	WBGene00006935	1403.27	0.419043	0.0717108	5.84352	5.11097e-09	5.69263e-07
ptr-24	WBGene00004238	789.975	-0.687333	0.117868	-5.83139	5.49685e-09	6.07707e-07
pept-3	WBGene00003878	104.737	-1.0005	0.171746	-5.82547	5.69513e-09	6.24998e-07
igcm-1	WBGene00018215	100.602	-2.40636	0.413766	-5.81575	6.03626e-09	6.57599e-07
T11F9.12	WBGene00011713	551.93	-0.598323	0.103423	-5.78523	7.2413e-09	7.83162e-07
vet-6	WBGene00006902	292.618	-1.63031	0.281937	-5.78251	7.35924e-09	7.90191e-07
ham-1	WBGene00001820	142.261	-1.98576	0.343587	-5.77949	7.49295e-09	7.98802e-07
cul-3	WBGene00000838	5758.07	0.263489	0.0456718	5.76919	7.96522e-09	8.43127e-07
aptf-4	WBGene00009202	130.425	-1.55964	0.27056	-5.76449	8.19065e-09	8.60884e-07
fbxc-28	WBGene00019922	92.3276	-1.487	0.258133	-5.7606	8.38132e-09	8.74764e-07
eef-1G	WBGene00008920	40582.5	0.266717	0.0463429	5.75529	8.6492e-09	8.96454e-07
skr-13	WBGene00004819	68.075	-1.58784	0.276309	-5.7466	9.10533e-09	9.37221e-07
madd-4	WBGene00009958	98.5339	-1.24384	0.216675	-5.74058	9.43505e-09	9.64508e-07
gasr-8	WBGene00008144	16.6587	2.36768	0.413516	5.72573	1.02991e-08	1.04567e-06
Y106G6D.2	WBGene00013699	73.7053	-1.79099	0.313416	-5.71441	1.10083e-08	1.11013e-06
sepa-1	WBGene00010808	334.206	-1.50944	0.264392	-5.70911	1.13571e-08	1.13004e-06
sdz-26	WBGene00011049	54.3358	-1.71119	0.299713	-5.70942	1.1336e-08	1.13004e-06
noah-1	WBGene00016422	835.892	-1.64631	0.28868	-5.70289	1.17793e-08	1.16427e-06
C35A11.4	WBGene00016431	177.937	-0.849101	0.149309	-5.68686	1.29398e-08	1.27057e-06
cct-6	WBGene00000381	7759.39	0.274733	0.0483989	5.67642	1.37543e-08	1.34172e-06
btb-11	WBGene00019700	52.7102	-1.84837	0.325699	-5.6751	1.38606e-08	1.34331e-06
C33G3.4	WBGene00007904	201.431	-1.21409	0.214193	-5.6682	1.44303e-08	1.3895e-06
fbf-2	WBGene00001402	626.441	0.576962	0.102211	5.64479	1.65385e-08	1.58229e-06
sco-1	WBGene00015297	940.178	0.381335	0.0675836	5.64243	1.6767e-08	1.59393e-06
skr-9	WBGene00004815	86.9971	-1.72704	0.30626	-5.63913	1.70912e-08	1.61447e-06
F47E1.2	WBGene00018566	72.987	-1.2916	0.229109	-5.63749	1.72542e-08	1.61962e-06
Y87G2A.13	WBGene00013601	1069.4	0.35092	0.0623973	5.62397	1.86622e-08	1.74083e-06
nrf-6	WBGene00003813	1459.94	-0.684517	0.121899	-5.61544	1.96063e-08	1.81754e-06
sdz-4	WBGene00016309	44.4859	-2.03511	0.362951	-5.60712	2.05727e-08	1.89535e-06
B0281.5	WBGene00015112	196.974	-1.20746	0.215477	-5.60368	2.09851e-08	1.92149e-06
Y92H12BR.7	WBGene00022372	689.244	0.629618	0.112427	5.60025	2.14046e-08	1.94794e-06
elo-2	WBGene00001240	2360.57	-0.480363	0.0858682	-5.59419	2.21655e-08	2.00497e-06
eva-1	WBGene00009304	99.862	-1.60862	0.287703	-5.59123	2.25471e-08	2.0272e-06
mnr-1	WBGene00012184	378.902	-0.656488	0.117705	-5.57738	2.44161e-08	2.1821e-06
C08F1.6	WBGene00015610	72.4107	-2.11213	0.378794	-5.57595	2.4619e-08	2.18713e-06
ooc-3	WBGene00003868	1609.3	0.30039	0.0539411	5.56884	2.56442e-08	2.23188e-06
gsr-1	WBGene00008117	4033.12	0.333387	0.0598393	5.57138	2.52735e-08	2.23188e-06
F10G7.9	WBGene00017372	1970.52	0.396871	0.0712731	5.56832	2.57209e-08	2.23188e-06
sdz-28	WBGene00020073	115.313	-1.55187	0.278596	-5.57031	2.54291e-08	2.23188e-06
cif-1	WBGene00019543	4478.4	0.241634	0.0435221	5.55198	2.82448e-08	2.43672e-06
acs-14	WBGene00008669	841.821	-0.602353	0.108976	-5.52738	3.25054e-08	2.78818e-06
pak-2	WBGene00006443	2363.92	0.369269	0.0668865	5.52082	3.37412e-08	2.87764e-06
nhr-68	WBGene00003658	526.333	-0.9616	0.174391	-5.51403	3.50708e-08	2.97404e-06
fbxc-51	WBGene00021576	249.266	-1.82572	0.332377	-5.49292	3.9535e-08	3.33367e-06
rig-4	WBGene00004371	4010.98	0.769222	0.140192	5.48692	4.0901e-08	3.42948e-06
C50F4.6	WBGene00001910	320.84	0.69053	0.125889	5.48525	4.12893e-08	3.4427e-06
T11G6.4	WBGene00011719	179.825	-0.679031	0.123903	-5.48033	4.24531e-08	3.52007e-06
F38A1.8	WBGene00009521	1718.66	0.359626	0.0656572	5.47732	4.31811e-08	3.56065e-06
ugt-12	WBGene00020592	586.891	-0.89709	0.164057	-5.46815	4.54758e-08	3.72926e-06
ekl-5	WBGene00012512	608.822	0.439737	0.0805394	5.4599	4.76402e-08	3.88541e-06
F02D8.4	WBGene00008521	283.595	-0.746894	0.136836	-5.45833	4.80627e-08	3.89856e-06
R05F9.6	WBGene00019890	4262.17	0.370056	0.0678456	5.45439	4.91422e-08	3.96458e-06
skr-12	WBGene00004818	58.23	-1.80453	0.330926	-5.45295	4.95397e-08	3.97516e-06
C05D11.1	WBGene00015481	4151.69	0.343592	0.0631147	5.44394	5.21155e-08	4.15949e-06
pro-3	WBGene00012676	1481.68	0.612008	0.112733	5.42884	5.67217e-08	4.50304e-06
K03B4.2	WBGene00019354	1746.5	0.302	0.0558619	5.40619	6.43797e-08	5.08395e-06
pssy-2	WBGene00012095	1352.82	0.321985	0.0596397	5.39884	6.70741e-08	5.26884e-06
btb-10	WBGene00019313	48.3636	-1.74495	0.323746	-5.38986	7.05111e-08	5.50983e-06
cra-1	WBGene00020068	3226.63	0.343169	0.0637448	5.38349	7.30568e-08	5.65195e-06
fbxb-84	WBGene00020544	48.89	-2.1386	0.397258	-5.38341	7.30871e-08	5.65195e-06
ttr-50	WBGene00010234	1110.81	-1.13299	0.210749	-5.37599	7.61617e-08	5.85934e-06
H43I07.1	WBGene00019274	968.977	0.381736	0.0710454	5.37313	7.73802e-08	5.92256e-06
nas-7	WBGene00003526	37.184	-1.79466	0.335136	-5.35501	8.55523e-08	6.51199e-06
K08D8.6	WBGene00010660	865.239	-0.972884	0.181706	-5.35416	8.59539e-08	6.51199e-06
R02F2.7	WBGene00019836	1196.46	0.562563	0.105186	5.34826	8.88042e-08	6.69396e-06
sipa-1	WBGene00012100	231.856	-0.753648	0.140955	-5.34675	8.95496e-08	6.71622e-06
arrd-1	WBGene00020205	123.674	-2.06026	0.385429	-5.34538	9.02294e-08	6.73337e-06
dsl-1	WBGene00001103	28.0159	-2.12888	0.399129	-5.33381	9.61748e-08	7.14134e-06
ugt-47	WBGene00011006	473.558	-0.589098	0.110516	-5.33043	9.79832e-08	7.2396e-06
fbxb-83	WBGene00020543	33.7643	-2.6101	0.489872	-5.32812	9.92356e-08	7.29602e-06
rpoa-1	WBGene00012999	1779.76	0.87176	0.163661	5.32664	1.00048e-07	7.31969e-06
cutl-28	WBGene00018256	44.8593	-2.76782	0.519707	-5.32573	1.00546e-07	7.32021e-06
T27E4.1	WBGene00020861	42.4275	1.91855	0.360638	5.31988	1.03834e-07	7.52289e-06
scav-4	WBGene00008692	181.077	-0.900295	0.169311	-5.3174	1.0526e-07	7.58937e-06
ZK287.1	WBGene00013962	95.4239	-1.67733	0.315863	-5.3103	1.09447e-07	7.85333e-06
sox-2	WBGene00004949	199.224	-1.16964	0.220393	-5.30703	1.11425e-07	7.95703e-06
cept-1	WBGene00009057	442.553	-0.714443	0.134856	-5.29784	1.17183e-07	8.24977e-06
cutl-15	WBGene00011888	31.921	-1.91571	0.361579	-5.29818	1.1696e-07	8.24977e-06
Y49A3A.3	WBGene00013026	509.285	0.464268	0.0876058	5.29951	1.16113e-07	8.24977e-06
hex-2	WBGene00015767	297.613	-1.03908	0.196181	-5.29653	1.18024e-07	8.26978e-06
ZC21.10	WBGene00044443	73.0842	1.46448	0.276542	5.29568	1.18575e-07	8.26978e-06
egl-46	WBGene00001210	91.3547	-2.49154	0.470767	-5.2925	1.20655e-07	8.37569e-06
cyc-1	WBGene00000869	6039.39	0.185919	0.035136	5.2914	1.21384e-07	8.38728e-06
nhx-2	WBGene00003730	655.178	-0.52305	0.0989317	-5.28698	1.24351e-07	8.51346e-06
pcn-1	WBGene00003955	6885.15	0.27398	0.051817	5.28745	1.24033e-07	8.51346e-06
EEED8.12	WBGene00017140	90.6322	-1.43694	0.271831	-5.28614	1.24924e-07	8.51362e-06
rha-2	WBGene00015525	1051.12	0.695598	0.13166	5.28328	1.26894e-07	8.6086e-06
cars-1	WBGene00000800	4761.42	0.292935	0.0555545	5.27293	1.34264e-07	9.02652e-06
linc-7	WBGene00219609	696.439	0.750234	0.142269	5.27333	1.33969e-07	9.02652e-06
rps-4	WBGene00004473	35244.2	0.311244	0.0590743	5.26869	1.37397e-07	9.19574e-06
mdl-1	WBGene00003163	400.614	-1.05372	0.200106	-5.2658	1.39577e-07	9.25861e-06
fbxb-75	WBGene00019956	44.1604	-2.35816	0.44782	-5.26588	1.3952e-07	9.25861e-06
dpf-6	WBGene00001059	67.3612	-1.3487	0.2566	-5.25605	1.47185e-07	9.72004e-06
Y48C3A.14	WBGene00012995	1972.89	0.371074	0.0706591	5.25161	1.50777e-07	9.91341e-06
gpr-1	WBGene00001688	458.341	-0.489205	0.0933958	-5.23798	1.62346e-07	1.06272e-05
set-27	WBGene00022173	619.264	0.564344	0.107864	5.23198	1.67708e-07	1.09303e-05
Y17D7C.2	WBGene00012456	32.92	6.46892	1.24144	5.21081	1.88021e-07	1.21481e-05
nprt-1	WBGene00021882	1816.89	0.392631	0.0753426	5.21128	1.87543e-07	1.21481e-05
sdz-14	WBGene00008782	52.0113	-2.01839	0.387615	-5.20721	1.91704e-07	1.22797e-05
fbxb-45	WBGene00019705	34.0272	-2.39034	0.459005	-5.20765	1.91251e-07	1.22797e-05
Y37E3.17	WBGene00021355	4752.88	0.327254	0.0630541	5.19005	2.10237e-07	1.34093e-05
cyn-6	WBGene00000882	242.693	-0.935707	0.180832	-5.17446	2.28569e-07	1.45166e-05
fkb-5	WBGene00001430	481.164	-0.594001	0.114835	-5.17264	2.30811e-07	1.45968e-05
fbxb-105	WBGene00017251	24.9043	-2.56965	0.496945	-5.1709	2.32965e-07	1.46709e-05
Y32F6A.4	WBGene00012529	539.431	-0.744612	0.144063	-5.16866	2.35784e-07	1.4786e-05
ctps-1	WBGene00012316	4132.41	0.435623	0.0845252	5.15376	2.55308e-07	1.59434e-05
atz-1	WBGene00009212	223.471	-1.1865	0.230332	-5.15127	2.58722e-07	1.60893e-05
zip-10	WBGene00012101	158.034	1.23672	0.240508	5.14212	2.71661e-07	1.68238e-05
rpt-6	WBGene00004506	3206.72	0.284994	0.0554338	5.14116	2.73049e-07	1.68399e-05
tufm-1	WBGene00007000	6007.26	0.219177	0.0426788	5.1355	2.8139e-07	1.72829e-05
hir-1	WBGene00016059	254.6	-0.656402	0.12796	-5.12975	2.90122e-07	1.77462e-05
C17E4.2	WBGene00007642	55.376	-1.66962	0.326292	-5.11694	3.10537e-07	1.86886e-05
F46G10.2	WBGene00009797	157.958	-1.07673	0.210401	-5.11751	3.09591e-07	1.86886e-05
ddo-3	WBGene00017648	2494.88	0.29524	0.057679	5.11868	3.07682e-07	1.86886e-05
F39G3.3	WBGene00018208	971.315	0.649302	0.126884	5.1173	3.09945e-07	1.86886e-05
M28.8	WBGene00010899	171.366	-0.814263	0.159247	-5.1132	3.16741e-07	1.89854e-05
T27E4.7	WBGene00020865	83.9231	-1.16227	0.227572	-5.10726	3.2686e-07	1.95135e-05
F43D9.1	WBGene00009653	168.347	-1.59478	0.312429	-5.10445	3.31751e-07	1.97266e-05
tomm-40	WBGene00007686	3208.92	0.312361	0.0613405	5.09226	3.53825e-07	2.08729e-05
fbxb-13	WBGene00015607	29.3777	-2.78146	0.546208	-5.09231	3.53731e-07	2.08729e-05
mtk-1	WBGene00003472	3041.05	0.436952	0.0858229	5.09133	3.55569e-07	2.08932e-05
ceh-32	WBGene00000453	198.587	-1.35952	0.267107	-5.08977	3.58493e-07	2.09824e-05
rps-7	WBGene00004476	29353.3	0.234559	0.0461508	5.08245	3.72603e-07	2.15547e-05
perm-2	WBGene00016636	13876.7	0.368888	0.0725729	5.08299	3.71532e-07	2.15547e-05
fbxc-3	WBGene00019073	85.7682	-19.9833	3.93113	-5.08334	3.70851e-07	2.15547e-05
pdi-1	WBGene00003962	8102.07	0.321187	0.0632509	5.07799	3.81455e-07	2.19815e-05
nep-22	WBGene00020788	664.194	-0.638731	0.125897	-5.07343	3.90714e-07	2.23426e-05
aakg-3	WBGene00021527	40.9724	-1.46493	0.288739	-5.07353	3.90493e-07	2.23426e-05
ncx-7	WBGene00003572	154.526	-0.861635	0.170394	-5.05672	4.26523e-07	2.42972e-05
ekl-1	WBGene00009052	1918.74	0.368463	0.072888	5.05519	4.29968e-07	2.43809e-05
fbxb-91	WBGene00044692	45.5441	-1.9662	0.388991	-5.05462	4.3126e-07	2.43809e-05
hpo-29	WBGene00021754	3230.12	0.610216	0.120836	5.04995	4.4192e-07	2.48893e-05
Y46E12BL.2	WBGene00021595	1732.46	0.786819	0.155915	5.04647	4.50041e-07	2.52513e-05
fkb-6	WBGene00001431	5378.5	0.305948	0.0606949	5.04074	4.63726e-07	2.59218e-05
W04A8.3	WBGene00012238	18.3591	-3.10001	0.615243	-5.03867	4.68779e-07	2.61065e-05
gen-1	WBGene00020442	2153.8	0.293754	0.0583117	5.03764	4.71304e-07	2.61495e-05
prg-2	WBGene00004179	2885.2	-0.476552	0.0947321	-5.03052	4.89154e-07	2.70075e-05
acs-5	WBGene00013575	1104.94	-0.46132	0.0917131	-5.03004	4.90387e-07	2.70075e-05
ccpp-1	WBGene00018995	1974.18	0.358129	0.0712306	5.02774	4.96298e-07	2.72325e-05
ntl-9	WBGene00016139	1925.51	0.379862	0.0756367	5.02218	5.10872e-07	2.79296e-05
ins-30	WBGene00002113	32.8231	-1.80688	0.359846	-5.02127	5.1332e-07	2.79609e-05
F56A8.8	WBGene00010142	69.0807	-1.14807	0.229001	-5.0134	5.34777e-07	2.90238e-05
fbxc-18	WBGene00016307	40.6433	-2.36442	0.472412	-5.00499	5.58642e-07	3.02092e-05
fbxb-24	WBGene00013234	43.849	-1.60517	0.320822	-5.0033	5.63582e-07	3.03663e-05
got-2.2	WBGene00015778	3020.54	0.284715	0.0569538	4.99905	5.76125e-07	3.09304e-05
hrpl-1	WBGene00016624	950.488	0.34378	0.0687925	4.99735	5.81228e-07	3.10039e-05
K02F2.5	WBGene00019324	142.968	-0.86292	0.17268	-4.99721	5.81647e-07	3.10039e-05
fbxb-35	WBGene00017208	24.6266	-2.47771	0.496159	-4.99378	5.92087e-07	3.1448e-05
dct-16	WBGene00012615	11593	-0.600163	0.120226	-4.99196	5.97693e-07	3.16332e-05
aat-6	WBGene00000007	98.5962	-1.1334	0.22749	-4.98218	6.28707e-07	3.30412e-05
mct-4	WBGene00003986	698.075	-0.527666	0.105911	-4.98218	6.28724e-07	3.30412e-05
egg-3	WBGene00009701	3665.25	0.366554	0.0736432	4.97743	6.44341e-07	3.37431e-05
fbxb-22	WBGene00013230	22.1827	-2.69967	0.542591	-4.97551	6.50771e-07	3.39607e-05
unc-86	WBGene00006818	33.5654	-2.59816	0.522992	-4.96788	6.76886e-07	3.52004e-05
T27D12.1	WBGene00012085	302.954	-0.801362	0.161335	-4.96706	6.79752e-07	3.52267e-05
fbxb-49	WBGene00019412	19.308	-2.25194	0.453486	-4.96583	6.84069e-07	3.53278e-05
arrd-2	WBGene00013086	94.3794	-1.11451	0.22462	-4.96175	6.98607e-07	3.59542e-05
ace-2	WBGene00000036	165.685	-0.848456	0.171023	-4.96105	7.01129e-07	3.596e-05
cpr-8	WBGene00021070	269.7	-0.706004	0.142522	-4.95366	7.28318e-07	3.72265e-05
Y111B2A.10	WBGene00013734	1039.44	0.296217	0.0598508	4.94925	7.45e-07	3.79492e-05
Y43C5A.2	WBGene00012782	1362.26	-0.435965	0.0881062	-4.94818	7.49116e-07	3.80291e-05
spe-49	WBGene00019667	57.1954	5.36275	1.0849	4.94306	7.69048e-07	3.89086e-05
R07E3.4	WBGene00011105	237.649	-0.979599	0.198223	-4.94192	7.73584e-07	3.90019e-05
R04A9.7	WBGene00044281	48.2308	-1.77728	0.35968	-4.94128	7.76118e-07	3.90019e-05
pes-2.1	WBGene00003977	287.948	-2.31608	0.468999	-4.93835	7.87873e-07	3.94597e-05
scav-5	WBGene00011076	158.04	-0.805898	0.163233	-4.93711	7.92874e-07	3.95774e-05
fbxb-54	WBGene00019418	40.3223	-1.97164	0.399444	-4.93596	7.97562e-07	3.96787e-05
mfsd-6	WBGene00020051	67.8684	-1.12562	0.228259	-4.93131	8.16809e-07	4.05013e-05
ptr-8	WBGene00004222	186.197	-0.767776	0.155897	-4.9249	8.44033e-07	4.17125e-05
cpn-1	WBGene00000777	3818.78	0.259325	0.0526632	4.92422	8.46987e-07	4.17204e-05
imb-1	WBGene00002075	3713.74	0.389738	0.0791721	4.92267	8.53711e-07	4.17758e-05
kpc-1	WBGene00002232	396.525	-0.759691	0.154306	-4.92327	8.5112e-07	4.17758e-05
hex-3	WBGene00012663	1910.15	0.40647	0.0826074	4.92051	8.63209e-07	4.21026e-05
sym-1	WBGene00006366	473.016	-1.55948	0.317	-4.91949	8.67684e-07	4.2183e-05
Y73F8A.5	WBGene00013518	39.1364	-1.77999	0.362121	-4.91546	8.85757e-07	4.29218e-05
cct-1	WBGene00000377	7997.85	0.300055	0.0610543	4.91456	8.89838e-07	4.29801e-05
ced-11	WBGene00000425	133.533	-1.20401	0.245221	-4.90989	9.11282e-07	4.38738e-05
kin-10	WBGene00002196	3807.01	0.211312	0.043059	4.9075	9.22442e-07	4.41419e-05
T04A8.7	WBGene00011409	4037.26	0.2503	0.0510043	4.90743	9.22766e-07	4.41419e-05
haf-2	WBGene00001812	2781.04	0.540014	0.110093	4.90509	9.33833e-07	4.44002e-05
rpl-19	WBGene00004431	19850.7	0.264433	0.0539123	4.90487	9.34874e-07	4.44002e-05
alkb-8	WBGene00007581	1193.49	0.453387	0.0924565	4.90379	9.40065e-07	4.44002e-05
F56C9.7	WBGene00018951	1199.09	-0.602416	0.122843	-4.90394	9.39339e-07	4.44002e-05
fbxb-103	WBGene00018746	54.2191	-1.6038	0.327104	-4.90303	9.43695e-07	4.44311e-05
glh-1	WBGene00001598	10204	-0.274703	0.0560442	-4.90154	9.50882e-07	4.4504e-05
otub-4	WBGene00015249	1412.59	0.340462	0.0694613	4.90147	9.51208e-07	4.4504e-05
Y69A2AR.18	WBGene00022089	10366.6	0.175296	0.0357849	4.8986	9.65217e-07	4.50183e-05
set-31	WBGene00007615	711.737	-0.439768	0.0898191	-4.89615	9.77333e-07	4.54414e-05
vps-4	WBGene00021334	2015.02	0.324118	0.0663404	4.88568	1.03072e-06	4.77747e-05
uba-1	WBGene00006699	16510.3	0.420267	0.0861242	4.87978	1.06204e-06	4.89617e-05
sgt-1	WBGene00019893	4703.67	0.253279	0.0519055	4.87962	1.06289e-06	4.89617e-05
bath-43	WBGene00011815	1782.24	0.378802	0.0776855	4.8761	1.08206e-06	4.96917e-05
plx-2	WBGene00004048	171.115	-1.41165	0.289943	-4.86871	1.12331e-06	5.1301e-05
sdz-5	WBGene00016578	35.4308	-2.38691	0.490268	-4.86859	1.12398e-06	5.1301e-05
nhr-3	WBGene00003602	363.518	-0.743671	0.153061	-4.85866	1.18183e-06	5.37771e-05
snt-4	WBGene00004924	229.015	-0.723577	0.149041	-4.85487	1.20463e-06	5.44823e-05
fbxb-43	WBGene00021774	24.7022	-2.71933	0.560083	-4.85523	1.20247e-06	5.44823e-05
snx-3	WBGene00006503	1393.82	0.33686	0.0694539	4.85012	1.23386e-06	5.54681e-05
ZK822.5	WBGene00014092	544.87	-0.65131	0.134271	-4.85071	1.23018e-06	5.54681e-05
tre-5	WBGene00006611	108.974	1.37869	0.284912	4.83901	1.3049e-06	5.82162e-05
rpoa-2	WBGene00008781	3044.8	0.529966	0.109526	4.83873	1.3067e-06	5.82162e-05
fbxb-63	WBGene00044197	19.6679	-2.39041	0.493901	-4.83987	1.29926e-06	5.82162e-05
usp-14	WBGene00006856	5085.05	0.291518	0.0602692	4.83692	1.31866e-06	5.84291e-05
ugt-26	WBGene00015695	323.58	-0.943135	0.194991	-4.83682	1.3193e-06	5.84291e-05
Y53F4B.7	WBGene00013154	217.313	3.33698	0.690093	4.83555	1.3278e-06	5.86316e-05
Y48G1A.1	WBGene00021657	509.057	0.691471	0.143129	4.83111	1.35776e-06	5.97776e-05
gsy-1	WBGene00001793	4220.1	0.307691	0.0637119	4.82942	1.36933e-06	6.01095e-05
eif-2Bdelta	WBGene00008670	2013.53	0.245756	0.0508988	4.82833	1.37681e-06	6.02606e-05
T24B8.3	WBGene00011977	768.21	-0.98084	0.203184	-4.82736	1.38358e-06	6.03799e-05
glt-1	WBGene00001620	1236.35	-0.585005	0.121292	-4.82311	1.41334e-06	6.14988e-05
itr-1	WBGene00002173	1371.69	-0.576099	0.119701	-4.81283	1.4881e-06	6.45636e-05
Y66D12A.16	WBGene00013442	571.68	0.579091	0.120417	4.80903	1.51666e-06	6.55544e-05
mppa-1	WBGene00022159	1213.27	0.372962	0.0775611	4.80863	1.51972e-06	6.55544e-05
sdz-9	WBGene00017253	45.882	-1.87271	0.389596	-4.8068	1.53361e-06	6.59631e-05
rps-0	WBGene00004469	38232.4	0.35815	0.0745199	4.8061	1.53903e-06	6.60056e-05
C15H9.5	WBGene00015801	347.392	-0.477935	0.0994766	-4.8045	1.5514e-06	6.63457e-05
Y32G9B.1	WBGene00021309	24.8232	-2.44	0.507985	-4.80329	1.56081e-06	6.65573e-05
hat-1	WBGene00044069	3475.29	0.331201	0.0690016	4.7999	1.58747e-06	6.75013e-05
C17F4.7	WBGene00015913	17345.9	-0.515964	0.10754	-4.79788	1.60358e-06	6.79925e-05
pbs-2	WBGene00003948	3532.3	0.287367	0.0599414	4.79413	1.6338e-06	6.90777e-05
F53H8.3	WBGene00018779	95.9361	-0.927848	0.193607	-4.79244	1.64769e-06	6.94682e-05
F35E12.10	WBGene00009434	1167.37	-0.502309	0.104836	-4.7914	1.65624e-06	6.9632e-05
sdz-16	WBGene00009297	26.3178	-1.70302	0.355941	-4.78456	1.71364e-06	7.18427e-05
rsp-5	WBGene00004702	2027.36	0.283226	0.0592425	4.78079	1.74611e-06	7.2999e-05
ZK899.6	WBGene00014144	41.7177	-1.80387	0.377426	-4.7794	1.75819e-06	7.32987e-05
ZK822.1	WBGene00014089	67.253	-2.05201	0.429983	-4.77229	1.82142e-06	7.57234e-05
ceh-20	WBGene00000443	283.495	-1.00593	0.210879	-4.77015	1.84085e-06	7.58971e-05
rpb-2	WBGene00016140	4707.63	0.261968	0.0549108	4.77079	1.83503e-06	7.58971e-05
ZK1193.2	WBGene00022858	784.505	-0.425598	0.0892137	-4.77055	1.83727e-06	7.58971e-05
cyy-1	WBGene00022697	1602.54	0.360411	0.0755803	4.76859	1.85524e-06	7.62796e-05
Y38E10A.22	WBGene00012600	2195.44	0.475886	0.0999437	4.76154	1.92119e-06	7.8774e-05
F02A9.10	WBGene00303021	3745.77	0.266172	0.0559141	4.76037	1.93236e-06	7.90149e-05
W01C8.5	WBGene00020921	489.725	-0.803647	0.169147	-4.75117	2.02241e-06	8.24711e-05
nas-11	WBGene00003530	914.77	-0.669142	0.140945	-4.74753	2.05913e-06	8.35121e-05
wars-1	WBGene00006945	2666.18	0.558383	0.117608	4.74785	2.05594e-06	8.35121e-05
gfm-1	WBGene00009246	2767.14	0.375225	0.0790722	4.74534	2.08153e-06	8.41919e-05
T15B7.1	WBGene00020516	1936.79	-0.476923	0.100516	-4.74475	2.08763e-06	8.42103e-05
linc-44	WBGene00219675	8.79836	4.21949	0.889496	4.74369	2.0986e-06	8.44248e-05
rpn-7	WBGene00004463	6429.26	0.24068	0.0507487	4.74259	2.11006e-06	8.46575e-05
fbxb-42	WBGene00021773	24.2034	-2.68203	0.56594	-4.73907	2.14697e-06	8.59076e-05
cct-2	WBGene00000378	8397.21	0.265861	0.056141	4.73559	2.18422e-06	8.71644e-05
rps-1	WBGene00004470	34273.5	0.236948	0.0500711	4.73223	2.22064e-06	8.83814e-05
M01E5.4	WBGene00010807	1316.98	0.255099	0.0539446	4.72891	2.25733e-06	8.96027e-05
tbp-1	WBGene00006542	1924.85	0.32337	0.0684554	4.72381	2.31467e-06	9.1635e-05
F25B5.5	WBGene00017776	1073.31	0.452029	0.0957487	4.72099	2.34702e-06	9.26699e-05
fbxb-95	WBGene00016880	19.8325	-2.91769	0.618097	-4.72044	2.35336e-06	9.26751e-05
D2023.1	WBGene00014300	91.719	-1.31849	0.279415	-4.71874	2.3731e-06	9.32066e-05
dve-1	WBGene00022861	206.578	-0.747052	0.158344	-4.71792	2.38269e-06	9.33378e-05
spr-2	WBGene00005007	2739.95	0.209562	0.044454	4.71414	2.42736e-06	9.48384e-05
lido-2	WBGene00015587	49.8306	-1.51757	0.32197	-4.71339	2.43632e-06	9.49402e-05
Y97E10C.1	WBGene00022410	504.973	-0.801396	0.170056	-4.71254	2.44643e-06	9.50858e-05
Y44A6C.2	WBGene00012851	105.656	-1.15191	0.244898	-4.70361	2.55596e-06	9.90848e-05
gpr-2	WBGene00001689	692.013	-0.35864	0.0762887	-4.70109	2.58779e-06	0.000100059
cut-4	WBGene00008482	19.0482	-2.03204	0.432777	-4.69534	2.66167e-06	0.00010265
xpd-1	WBGene00021752	1348.96	0.446769	0.0952632	4.68984	2.73416e-06	0.000105174
F01G4.6	WBGene00008505	19285.4	0.255866	0.0545988	4.68628	2.78215e-06	0.000106744
Y65A5A.1	WBGene00013418	53.9731	-2.0759	0.443029	-4.6857	2.79009e-06	0.000106775
rla-0	WBGene00004408	46881.5	0.255571	0.0545786	4.68263	2.83217e-06	0.000108108
polg-1	WBGene00013258	767.241	0.483542	0.103349	4.67873	2.88651e-06	0.000109901
trpa-1	WBGene00007801	88.2252	-1.06575	0.227889	-4.67662	2.91647e-06	0.000110759
cyp-13A2	WBGene00011676	102.137	-0.837469	0.179101	-4.67595	2.9259e-06	0.000110835
Y7A9D.1	WBGene00012420	59.9485	-1.75475	0.375701	-4.67059	3.00331e-06	0.00011348
cox-15	WBGene00011526	1475.38	0.284891	0.0610775	4.66442	3.09483e-06	0.000116492
cutl-16	WBGene00019426	75.3558	-1.75384	0.376025	-4.66417	3.09866e-06	0.000116492
F57G12.1	WBGene00010221	985.002	-0.808836	0.173466	-4.66279	3.11949e-06	0.000116981
Y75B8A.7	WBGene00013544	1370.37	0.589908	0.12663	4.65852	3.18494e-06	0.000119136
rpl-35	WBGene00004449	11758.2	0.257492	0.0553393	4.65297	3.27185e-06	0.000122081
srpa-68	WBGene00010097	3713.12	0.185967	0.0399795	4.65156	3.29438e-06	0.00012231
C10G11.6	WBGene00015686	765.623	0.47966	0.103117	4.6516	3.29364e-06	0.00012231
let-630	WBGene00002804	2195.72	0.235276	0.05059	4.65064	3.30904e-06	0.000122549
Y47G6A.18	WBGene00021644	1177.18	0.544051	0.117004	4.64985	3.3218e-06	0.000122699
tag-266	WBGene00044319	816.84	0.691674	0.148767	4.64937	3.32951e-06	0.000122699
ubxn-6	WBGene00019163	3057.94	0.311815	0.0671108	4.64627	3.37994e-06	0.00012425
M03D4.4	WBGene00019751	63.4155	-1.70718	0.367587	-4.6443	3.4123e-06	0.000125132
Y39G10AL.1	WBGene00021458	34.7479	-1.72029	0.371127	-4.63532	3.56387e-06	0.00013037
dgk-1	WBGene00000958	103.503	-1.27552	0.275277	-4.63359	3.59379e-06	0.000131143
atp-5	WBGene00007385	8421.57	0.210435	0.0454269	4.6324	3.6145e-06	0.000131577
gld-3	WBGene00001597	7911.39	0.287226	0.0620333	4.63019	3.65335e-06	0.000132667
Y73C8C.8	WBGene00022265	84.2375	-1.15483	0.249486	-4.62885	3.67702e-06	0.000133203
B0491.5	WBGene00007192	3651.82	0.245884	0.0531293	4.62803	3.69155e-06	0.000133405
fbxb-108	WBGene00017249	14.2924	-2.92004	0.631092	-4.62696	3.71066e-06	0.000133772
gpcp-2	WBGene00011511	2696.85	0.289536	0.062624	4.6234	3.7751e-06	0.000135767
clec-10	WBGene00015403	226.316	-0.582141	0.126024	-4.61928	3.85075e-06	0.000138155
cmt-1	WBGene00016564	1298.66	0.268702	0.0581888	4.61776	3.87905e-06	0.000138836
T14B4.1	WBGene00020498	2453.26	0.414919	0.0898651	4.61712	3.89093e-06	0.000138929
klp-10	WBGene00002221	986.391	-0.298715	0.0647082	-4.61633	3.9058e-06	0.000139127
rec-8	WBGene00004333	2248.61	0.537789	0.116536	4.61479	3.93502e-06	0.000139758
elpc-2	WBGene00013738	1257.29	0.439572	0.0952711	4.61391	3.95161e-06	0.000139758
fbxb-90	WBGene00044694	23.2327	-2.07667	0.450061	-4.61418	3.94643e-06	0.000139758
lin-18	WBGene00003007	133.618	-0.727407	0.157894	-4.60695	4.08628e-06	0.000144179
unc-45	WBGene00006781	1854.48	0.354915	0.0771553	4.6	4.22484e-06	0.000148716
crn-6	WBGene00000799	161.216	-1.00805	0.219237	-4.59799	4.26593e-06	0.000149067
ima-2	WBGene00002073	11208.4	0.338267	0.0735753	4.59756	4.27476e-06	0.000149067
Y39A3CL.4	WBGene00021442	1052.47	0.264245	0.0574678	4.59815	4.26267e-06	0.000149067
mrpl-39	WBGene00044344	769.834	0.370472	0.080561	4.59865	4.25238e-06	0.000149067
clec-97	WBGene00013931	302.465	-0.68748	0.149599	-4.59549	4.31734e-06	0.000150201
mcrs-1	WBGene00010420	1477.91	0.383064	0.0833949	4.59337	4.36146e-06	0.000151383
daf-7	WBGene00000903	54.6041	-1.1844	0.258067	-4.58952	4.44263e-06	0.000153843
ego-1	WBGene00001214	4102.54	0.430765	0.0938971	4.58763	4.48317e-06	0.000154529
F13B12.6	WBGene00008733	3015.8	0.362075	0.0789192	4.58793	4.47669e-06	0.000154529
T14B1.1	WBGene00011763	172.164	-1.16392	0.253862	-4.58485	4.54306e-06	0.000156233
fbxb-26	WBGene00019035	30.837	-1.8138	0.395663	-4.58421	4.55705e-06	0.000156354
dhhc-8	WBGene00012718	919.927	0.593844	0.129642	4.58063	4.63573e-06	0.000158689
mev-1	WBGene00003225	1748.27	0.285528	0.0623458	4.57974	4.65553e-06	0.000159002
K02F3.2	WBGene00019326	1763.39	0.473802	0.103543	4.57591	4.74149e-06	0.000161568
dars-1	WBGene00001094	4810.32	0.224052	0.0490263	4.57004	4.8763e-06	0.000165783
K08E3.5	WBGene00010665	10405.4	0.25436	0.0556715	4.56895	4.90183e-06	0.000166272
odd-2	WBGene00003846	72.3832	-1.08513	0.237638	-4.56631	4.96378e-06	0.000167992
cfim-2	WBGene00008362	2397.53	0.388166	0.0850175	4.56572	4.97787e-06	0.000168087
spp-10	WBGene00004995	3402.13	0.276879	0.0606561	4.56474	5.00113e-06	0.000168492
trr-1	WBGene00007028	4754.61	0.809155	0.177283	4.56421	5.01385e-06	0.00016854
fbxb-37	WBGene00020537	39.7737	-1.9392	0.425284	-4.55977	5.121e-06	0.000171755
Y67A10A.9	WBGene00013458	115.416	-1.10153	0.241668	-4.55804	5.16324e-06	0.000172783
set-32	WBGene00008062	524.588	0.527279	0.115708	4.55699	5.18909e-06	0.000173252
Y54E10A.11	WBGene00021831	2589.57	0.303476	0.0666023	4.55653	5.20047e-06	0.000173252
vpr-1	WBGene00018008	3378.82	0.222126	0.0487861	4.55307	5.2869e-06	0.000175739
ceh-13	WBGene00000437	94.0381	-1.13595	0.249735	-4.5486	5.40027e-06	0.000178316
uba-2	WBGene00006700	3500.6	0.24787	0.0544879	4.54908	5.38798e-06	0.000178316
fbxc-26	WBGene00019043	18.1768	-2.94591	0.647647	-4.54863	5.39954e-06	0.000178316
paa-1	WBGene00003901	8011.01	0.248141	0.0545666	4.54749	5.42888e-06	0.000178865
rps-3	WBGene00004472	28732.7	0.220077	0.0484453	4.5428	5.55113e-06	0.000182095
cct-7	WBGene00020391	6079.33	0.433494	0.0954246	4.5428	5.55129e-06	0.000182095
AC8.11	WBGene00043989	29.4641	20.1739	4.44534	4.53822	5.673e-06	0.000185679
nol-9	WBGene00010709	721.784	0.488226	0.107633	4.53602	5.73264e-06	0.000187012
R193.2	WBGene00020128	922.503	-0.998795	0.220203	-4.53579	5.73879e-06	0.000187012
eif-6	WBGene00001234	1913.81	0.320686	0.0707119	4.5351	5.75762e-06	0.000187217
C44C1.1	WBGene00016641	251.285	-0.740093	0.163506	-4.52639	6.00003e-06	0.000194675
hhat-2	WBGene00013312	27.4332	-2.37367	0.524721	-4.52368	6.07747e-06	0.00019676
grsp-1	WBGene00012840	54.3182	1.35077	0.299168	4.5151	6.32857e-06	0.000204446
R02C2.1	WBGene00019814	41.4488	-1.3417	0.297262	-4.51351	6.37621e-06	0.00020554
C50D2.7	WBGene00016810	936.287	0.37003	0.0820327	4.51076	6.45969e-06	0.000207782
tiar-1	WBGene00015943	4865.03	0.330939	0.0734003	4.50869	6.52286e-06	0.000209363
T02E1.2	WBGene00011375	1516.54	0.286372	0.0635291	4.50773	6.5524e-06	0.00020986
Y92H12A.4	WBGene00022360	1398.45	0.61059	0.135469	4.50723	6.56788e-06	0.000209905
sly-1	WBGene00009654	1316.26	0.322363	0.0715337	4.50645	6.59209e-06	0.000210228
K05F6.4	WBGene00019415	51.4456	-1.49464	0.332155	-4.49982	6.80102e-06	0.000216429
Y71F9AL.7	WBGene00022112	22.472	-3.43553	0.764101	-4.49617	6.91876e-06	0.000219708
C05G5.1	WBGene00007347	118.851	-0.695434	0.154845	-4.49117	7.0834e-06	0.000224458
clh-6	WBGene00000533	1229.75	0.333345	0.0742523	4.48936	7.1438e-06	0.000225614
cct-8	WBGene00021934	6807.33	0.437663	0.0974931	4.48917	7.15013e-06	0.000225614
eif-3.D	WBGene00001227	5380.08	0.285736	0.0636968	4.48589	7.26118e-06	0.000228635
Y65B4BL.3	WBGene00022035	333.017	0.410605	0.0915895	4.4831	7.35679e-06	0.000231158
fars-3	WBGene00001498	3242.39	0.278556	0.0622035	4.47814	7.52975e-06	0.000235601
F54D5.7	WBGene00010052	2182.07	0.249945	0.0558135	4.47822	7.52667e-06	0.000235601
pqn-52	WBGene00019713	3923.11	0.188794	0.0421704	4.47694	7.57204e-06	0.000236428
pes-2.2	WBGene00010158	329.225	-1.21201	0.270986	-4.47258	7.72803e-06	0.000240795
pcp-3	WBGene00003958	1053.36	-0.871965	0.195016	-4.47124	7.77669e-06	0.000241806
fbxb-119	WBGene00007182	23.7923	-1.88494	0.421786	-4.46895	7.86034e-06	0.000243899
hsp-4	WBGene00002008	13414.8	0.336364	0.0752934	4.46738	7.91841e-06	0.000245191
Y71H2AM.3	WBGene00022168	1019.25	0.279262	0.062519	4.46683	7.93856e-06	0.000245306
Y53F4B.8	WBGene00013155	389.793	1.81038	0.405469	4.4649	8.01073e-06	0.000247025
K10C3.5	WBGene00010732	1475.43	0.294295	0.0659208	4.46438	8.03016e-06	0.000247114
sdhb-1	WBGene00006433	3045.09	0.249749	0.0559956	4.46016	8.18976e-06	0.000251506
gtf-2E1	WBGene00013998	1418.9	0.411435	0.0922877	4.45818	8.26599e-06	0.000253326
rps-11	WBGene00004480	21495.6	0.225734	0.0506611	4.45577	8.35924e-06	0.000255659
ugt-63	WBGene00015449	214.836	-1.30715	0.293446	-4.45449	8.40923e-06	0.000256662
twk-1	WBGene00006656	181.713	-0.620223	0.13941	-4.44892	8.63047e-06	0.000262877
rhr-1	WBGene00004358	1760.04	-0.424777	0.095504	-4.44774	8.67788e-06	0.000263034
unc-85	WBGene00006817	1365.19	-0.418074	0.0940026	-4.44748	8.6885e-06	0.000263034
sptf-1	WBGene00009743	41.0984	-1.93934	0.436025	-4.44777	8.67645e-06	0.000263034
fbxb-74	WBGene00019952	23.5167	-2.0992	0.47235	-4.44416	8.82367e-06	0.000266586
trk-1	WBGene00017039	17.2782	-2.51351	0.565728	-4.44296	8.87297e-06	0.000267533
tag-180	WBGene00007041	57.858	-1.1244	0.253103	-4.44247	8.89324e-06	0.000267604
dap-3	WBGene00000933	1298.07	0.235922	0.0531275	4.44068	8.96739e-06	0.000269292
rpc-1	WBGene00004411	4282.22	0.549998	0.123925	4.43815	9.07336e-06	0.000271928
hnd-1	WBGene00001981	42.0222	-1.53419	0.34576	-4.43715	9.1159e-06	0.000272655
Y73F8A.24	WBGene00013529	792.446	0.330577	0.0745236	4.43588	9.16981e-06	0.000273719
T27E9.6	WBGene00012096	25.3336	-2.23682	0.505306	-4.42668	9.56963e-06	0.000285083
perm-4	WBGene00016638	19941.9	0.462229	0.104477	4.42424	9.67842e-06	0.00028775
arx-1	WBGene00000199	1939.62	0.268506	0.0607389	4.42066	9.84e-06	0.000291972
snap-29	WBGene00019305	2179.14	0.284259	0.0644165	4.41283	1.0203e-05	0.000302142
nemp-1	WBGene00017328	3522.01	0.234321	0.0531629	4.4076	1.04521e-05	0.000308906
C56G2.3	WBGene00016978	471.964	0.404762	0.0918692	4.40586	1.05367e-05	0.000310791
eef-2	WBGene00001167	103377	0.239747	0.0545665	4.39367	1.11452e-05	0.000327444
sams-2	WBGene00013652	33.7894	-1.7582	0.400162	-4.39373	1.11424e-05	0.000327444
C35E7.3	WBGene00016455	49.7431	-1.10609	0.251811	-4.39255	1.1203e-05	0.000328498
F19B2.5	WBGene00008944	3179.62	1.36874	0.311713	4.39101	1.12825e-05	0.000329532
H05C05.1	WBGene00019157	2807.66	0.594285	0.135338	4.39113	1.12766e-05	0.000329532
tes-1	WBGene00015217	227.211	-0.618252	0.14083	-4.39006	1.13321e-05	0.000330334
nlp-68	WBGene00011899	19.0788	-1.82043	0.415242	-4.38402	1.16512e-05	0.000338974
hpo-32	WBGene00015313	884.837	0.270668	0.0617685	4.38197	1.17612e-05	0.000341013
C18H9.5	WBGene00016003	31.9232	-1.56955	0.358192	-4.38186	1.17669e-05	0.000341013
enol-1	WBGene00011884	14517.6	0.276164	0.0630813	4.37791	1.19822e-05	0.000346579
C36B1.11	WBGene00007978	2941.09	0.258951	0.0591788	4.37574	1.21021e-05	0.000349371
lin-14	WBGene00003003	528.336	-0.773103	0.176925	-4.36967	1.24436e-05	0.000358533
pal-1	WBGene00003912	2433.36	0.233099	0.0533632	4.36816	1.25299e-05	0.000360326
nhr-14	WBGene00003613	229.115	-0.732013	0.167635	-4.36671	1.2613e-05	0.000361719
rgef-1	WBGene00009100	28.4177	-1.60803	0.368267	-4.36647	1.26268e-05	0.000361719
fbxb-81	WBGene00020541	15.7689	-2.97558	0.681645	-4.3653	1.2695e-05	0.000362975
R09E10.5	WBGene00011175	320.001	-1.50221	0.344192	-4.36447	1.27433e-05	0.000363113
nmt-1	WBGene00020549	3302.16	0.212207	0.0486226	4.36438	1.27485e-05	0.000363113
C26G2.2	WBGene00007751	267.751	-0.508965	0.116748	-4.35951	1.30355e-05	0.000370581
Y57A10A.7	WBGene00013252	195.147	0.469431	0.10772	4.35789	1.31325e-05	0.000372628
dlat-1	WBGene00009082	5767.48	0.255115	0.0585535	4.35695	1.31885e-05	0.000373321
cutl-9	WBGene00010893	34.663	-2.50433	0.574829	-4.35665	1.32069e-05	0.000373321
C14C11.2	WBGene00015766	1097.67	0.332109	0.076344	4.35016	1.36038e-05	0.000383813
sptl-3	WBGene00011932	1866.6	-0.327789	0.0753778	-4.34861	1.37004e-05	0.000385809
ilys-5	WBGene00017691	6512.22	-0.502421	0.115555	-4.34788	1.37461e-05	0.000386366
BE10.3	WBGene00007211	40.7306	-1.44003	0.331238	-4.34741	1.37756e-05	0.000386467
skih-2	WBGene00008502	2329.94	0.46014	0.105921	4.34418	1.39796e-05	0.000391455
H20J04.4	WBGene00019219	774.51	0.457067	0.105289	4.34106	1.41797e-05	0.000396315
H24K24.3	WBGene00019240	2539.23	0.212735	0.0490112	4.34054	1.42135e-05	0.000396517
set-17	WBGene00011887	1296.91	0.336871	0.077638	4.339	1.43135e-05	0.000398563
C47D12.4	WBGene00008138	37.3064	-1.94916	0.44937	-4.33754	1.44084e-05	0.000400457
rpl-13	WBGene00004425	28989	0.25922	0.0597766	4.33648	1.44783e-05	0.000401651
H14A12.3	WBGene00019196	1136.19	0.451855	0.104264	4.33375	1.46594e-05	0.000405921
mrps-31	WBGene00007859	847.145	0.39677	0.0915908	4.33199	1.4777e-05	0.000408421
tbc-6	WBGene00015410	162.571	-0.63057	0.14571	-4.32755	1.50774e-05	0.000415952
K10D3.4	WBGene00010738	269.526	-1.33439	0.308559	-4.32458	1.52821e-05	0.000420823
rpn-5	WBGene00004461	6569.74	0.244602	0.0566566	4.31727	1.57972e-05	0.000431944
folt-1	WBGene00007388	226.191	-0.96505	0.223536	-4.3172	1.58018e-05	0.000431944
W04A8.4	WBGene00012239	406.072	-1.29191	0.299215	-4.31765	1.57699e-05	0.000431944
fbxb-17	WBGene00019037	49.4447	-1.53198	0.35485	-4.31725	1.57984e-05	0.000431944
F44F1.4	WBGene00009696	53.8952	-1.60985	0.372964	-4.31638	1.58605e-05	0.000432758
gei-1	WBGene00001559	345.274	-0.929594	0.215386	-4.31594	1.58925e-05	0.000432838
ufd-2	WBGene00006734	4504.21	-0.21005	0.048676	-4.31527	1.59408e-05	0.000433364
pgk-1	WBGene00020185	3379.23	0.359342	0.0832871	4.3145	1.59964e-05	0.000434085
Y37D8A.2	WBGene00012544	3558.54	0.398587	0.0923985	4.31379	1.60482e-05	0.0004347
ptr-13	WBGene00004227	375.472	-0.549785	0.127492	-4.3123	1.61564e-05	0.000436837
Y55F3AM.13	WBGene00021930	1817.5	0.262463	0.0608828	4.31096	1.62545e-05	0.000438695
acd-2	WBGene00016066	102.827	-0.801064	0.185946	-4.30806	1.64696e-05	0.000443697
lgc-47	WBGene00009799	31.094	-1.80369	0.419489	-4.29973	1.71008e-05	0.000459874
tmem-135	WBGene00019345	135.983	-0.824391	0.191797	-4.29824	1.72159e-05	0.000462136
eef-1A.1	WBGene00001168	203650	0.324119	0.0755025	4.29282	1.76415e-05	0.00047271
F13C5.2	WBGene00017423	646.987	-0.873997	0.203743	-4.28971	1.78903e-05	0.000478518
edc-3	WBGene00011036	3687	0.301948	0.0704048	4.28874	1.79688e-05	0.000479757
ucr-1	WBGene00018963	6900.8	0.35336	0.0824056	4.28806	1.80237e-05	0.000480364
ppm-1.G	WBGene00018362	4597.67	0.246444	0.0574959	4.28629	1.81683e-05	0.000483354
toe-1	WBGene00022739	3364.14	0.369498	0.0862448	4.2843	1.83318e-05	0.000486837
jnk-1	WBGene00002178	46.0369	-1.2816	0.299284	-4.28222	1.85041e-05	0.000490539
C34E7.4	WBGene00007934	298.426	-0.661057	0.154442	-4.28029	1.86648e-05	0.000493922
F13G3.7	WBGene00008767	834.825	0.351444	0.0821488	4.27814	1.88463e-05	0.000497844
C34F6.7	WBGene00007941	276.501	-0.504772	0.118055	-4.27574	1.90507e-05	0.000502354
ugt-23	WBGene00007650	384.119	-0.649998	0.152084	-4.27393	1.92056e-05	0.000505545
F10E7.1	WBGene00017343	16.9661	-2.30016	0.538434	-4.27195	1.93772e-05	0.000509163
rps-5	WBGene00004474	22380.2	0.272339	0.0637614	4.27121	1.94411e-05	0.000509945
cct-3	WBGene00018782	6607.21	0.356129	0.0833974	4.27027	1.95237e-05	0.000511212
R11E3.2	WBGene00020004	68.6101	-0.88897	0.208304	-4.26765	1.97539e-05	0.000516335
fbf-1	WBGene00001401	890.24	0.479588	0.112424	4.26588	1.99116e-05	0.000519547
F27D4.1	WBGene00009187	2975.22	0.195746	0.0459182	4.26294	2.01759e-05	0.000525523
tba-5	WBGene00006531	20.814	-2.56166	0.601103	-4.2616	2.02973e-05	0.000526318
cdkr-3	WBGene00013765	1133.04	0.35442	0.083166	4.2616	2.02971e-05	0.000526318
ykt-6	WBGene00015164	1012.56	0.375778	0.0881811	4.26143	2.03122e-05	0.000526318
Y53G8AR.7	WBGene00021814	125.171	-0.811328	0.190465	-4.25972	2.04679e-05	0.000529435
rpt-5	WBGene00004505	5544.12	0.249801	0.0586558	4.25876	2.05562e-05	0.000530798
jmjc-1	WBGene00020902	172.336	-0.879781	0.206616	-4.25805	2.06218e-05	0.000531571
scav-6	WBGene00008542	103.832	-0.90033	0.211493	-4.25702	2.07174e-05	0.000533116
nath-10	WBGene00018866	2054.13	0.464118	0.109094	4.25431	2.09698e-05	0.000537763
trpp-10	WBGene00022138	1033.01	0.572739	0.134626	4.2543	2.09701e-05	0.000537763
unc-6	WBGene00006746	119.678	-1.06179	0.249635	-4.25337	2.10581e-05	0.000538171
dcap-1	WBGene00021929	1810.77	0.299827	0.0704868	4.25367	2.10298e-05	0.000538171
mccc-1	WBGene00009319	3503.47	0.237362	0.0558165	4.25254	2.1136e-05	0.000539238
lst-1	WBGene00003083	2311.29	0.372222	0.0875428	4.25189	2.11979e-05	0.000539894
R10E11.6	WBGene00011218	375.561	0.376626	0.0888221	4.24023	2.23294e-05	0.000567746
fbxc-25	WBGene00019591	21.8126	-2.23341	0.526837	-4.23929	2.24231e-05	0.000568199
F22F7.8	WBGene00194908	218.72	-0.793115	0.187087	-4.23928	2.24234e-05	0.000568199
nud-2	WBGene00011230	2234.05	0.252789	0.0596543	4.23757	2.25955e-05	0.000571589
ttb-1	WBGene00006648	1448.32	0.25994	0.0613477	4.23717	2.26358e-05	0.00057164
fbxc-21	WBGene00019042	18.5229	-2.56361	0.605144	-4.23637	2.27167e-05	0.000572714
pyk-1	WBGene00009126	8968.99	0.278445	0.0657723	4.23347	2.3011e-05	0.000579155
skr-7	WBGene00004813	297.66	-0.811798	0.191854	-4.23133	2.32311e-05	0.00058371
nep-11	WBGene00017557	80.775	-0.913591	0.215974	-4.23011	2.33581e-05	0.000585916
wht-2	WBGene00007513	1658.3	0.31423	0.0743462	4.22658	2.3727e-05	0.000594169
Y57A10A.14	WBGene00013257	48.5628	-1.13504	0.268783	-4.22287	2.41206e-05	0.000603015
fbxb-38	WBGene00016337	11.4271	-3.4722	0.823262	-4.21762	2.46899e-05	0.000616215
cogc-1	WBGene00003258	1721.11	0.435646	0.103364	4.21466	2.50153e-05	0.000623294
nep-26	WBGene00014171	84.1468	-0.900826	0.213789	-4.21362	2.51306e-05	0.000625123
mcm-2	WBGene00003154	7892.65	0.359374	0.085317	4.21223	2.52865e-05	0.000627954
dop-3	WBGene00020506	16.4207	-2.46108	0.584853	-4.20803	2.57605e-05	0.000638663
ceh-36	WBGene00000457	28.171	-2.01588	0.47925	-4.20632	2.59558e-05	0.000642438
D2030.2	WBGene00008412	1909.29	0.294529	0.0700362	4.20539	2.60636e-05	0.000644038
fbxb-41	WBGene00019703	45.0056	-1.55755	0.370556	-4.20326	2.63093e-05	0.000649036
W05F2.6	WBGene00021038	1840.17	0.344938	0.0820864	4.20213	2.6442e-05	0.00065016
Y92H12A.5	WBGene00022361	2048.37	0.521165	0.124023	4.20217	2.64374e-05	0.00065016
lep-2	WBGene00002278	937.493	0.529538	0.126032	4.2016	2.65031e-05	0.00065059
swt-3	WBGene00007384	172.487	-1.31407	0.312825	-4.20067	2.66121e-05	0.000652114
T05F1.4	WBGene00011490	875.887	0.281194	0.0669457	4.20033	2.66526e-05	0.000652114
Y111B2A.25	WBGene00014613	278.293	-0.464648	0.11068	-4.19813	2.69129e-05	0.000657407
mut-2	WBGene00003499	1704.13	0.288958	0.0688437	4.19731	2.70107e-05	0.000658716
syx-18	WBGene00020425	1503.66	0.276613	0.0659304	4.19553	2.72236e-05	0.000662825
miro-1	WBGene00019544	1763.49	0.27817	0.0663098	4.195	2.72869e-05	0.000663285
nduf-2.2	WBGene00006463	2614.81	0.246813	0.0588665	4.19275	2.75589e-05	0.000668806
gly-3	WBGene00001628	2023.8	0.198657	0.0473923	4.19176	2.76794e-05	0.000670641
lem-2	WBGene00002275	2847.62	0.784281	0.187224	4.18901	2.80175e-05	0.000677715
T22B2.1	WBGene00020665	128.233	-1.07943	0.257703	-4.18865	2.80622e-05	0.000677715
erd-2.1	WBGene00001331	797.716	-0.459107	0.109661	-4.18662	2.83138e-05	0.000682687
Y75B8A.25	WBGene00013558	1426.12	0.419699	0.100345	4.18255	2.88252e-05	0.000693897
mel-46	WBGene00020284	1832.79	0.481843	0.11525	4.18085	2.90425e-05	0.000698002
teg-1	WBGene00006563	666.7	0.572888	0.137055	4.17999	2.9152e-05	0.000699506
cand-1	WBGene00013606	5629.54	0.406653	0.0973364	4.17781	2.94331e-05	0.000705119
hcf-1	WBGene00001827	5713.07	0.235087	0.0563371	4.17286	3.008e-05	0.000719462
smg-9	WBGene00013188	380.57	0.651105	0.156067	4.17195	3.02005e-05	0.000720337
ctsa-2	WBGene00021503	739.453	-0.527522	0.126448	-4.17185	3.02131e-05	0.000720337
ragc-1	WBGene00012497	3111.7	0.22461	0.0538603	4.17023	3.04295e-05	0.000724338
slc-17.2	WBGene00008000	3949.63	0.300506	0.072072	4.16952	3.05243e-05	0.000725437
ceh-43	WBGene00000463	112.642	-1.28488	0.30828	-4.16791	3.07401e-05	0.000729406
usp-5	WBGene00020839	3796.89	0.371372	0.0891259	4.16683	3.08871e-05	0.000731729
F58B3.4	WBGene00010231	2192.73	-0.260869	0.0626738	-4.16233	3.15018e-05	0.00074511
Y92H12BR.3	WBGene00022369	4378.82	0.22812	0.0548423	4.15955	3.18872e-05	0.000753033
srw-71	WBGene00005818	15.1263	5.54508	1.33321	4.15918	3.19389e-05	0.000753062
glp-4	WBGene00006936	6921.66	0.248071	0.0596556	4.15838	3.20518e-05	0.000753345
Y59A8B.21	WBGene00013353	788.703	0.390917	0.0940071	4.15838	3.2051e-05	0.000753345
Y37A1A.2	WBGene00012535	95.0652	-1.25367	0.301898	-4.15262	3.28697e-05	0.000771352
cdc-25.1	WBGene00000386	5531.22	0.307664	0.0740956	4.15226	3.29215e-05	0.000771355
sars-1	WBGene00005663	4602.62	0.194989	0.0469743	4.15098	3.31055e-05	0.000774452
cla-1	WBGene00018468	270.186	-1.45357	0.350207	-4.15062	3.31582e-05	0.00077447
erfa-3	WBGene00010405	4832.86	0.183778	0.0442878	4.14964	3.32999e-05	0.000776565
Y48E1B.8	WBGene00013007	254.71	-1.04752	0.252549	-4.14778	3.35722e-05	0.000781693
ceh-48	WBGene00015934	46.2192	-1.77015	0.427063	-4.14494	3.39906e-05	0.000790202
ddl-2	WBGene00013000	553.963	0.71908	0.173499	4.14458	3.40437e-05	0.000790206
dop-5	WBGene00011382	20.1183	-2.03878	0.4921	-4.14303	3.42754e-05	0.000794349
C09G9.1	WBGene00007492	2445.89	0.300245	0.0725095	4.14076	3.46154e-05	0.000799744
F55H2.5	WBGene00010131	648.171	0.307455	0.0742492	4.14085	3.46019e-05	0.000799744
ptr-14	WBGene00004228	216.489	-0.68143	0.164699	-4.13742	3.51239e-05	0.000810238
ceh-44	WBGene00000464	1992.97	0.243812	0.058952	4.13577	3.5376e-05	0.000813539
pfs-2	WBGene00011051	2194.63	0.482534	0.116664	4.13609	3.53273e-05	0.000813539
B0524.6	WBGene00015245	1389.59	0.438198	0.106088	4.1305	3.61974e-05	0.000831147
dhs-5	WBGene00000969	100.075	-1.04805	0.253845	-4.12871	3.64805e-05	0.000836362
sti-1	WBGene00019983	3163.3	0.280926	0.06807	4.12701	3.67503e-05	0.000841254
sdha-2	WBGene00016392	3728.1	0.29489	0.0715111	4.12369	3.72844e-05	0.000852174
ptr-4	WBGene00004219	175.262	-1.33125	0.322905	-4.12274	3.74394e-05	0.000854407
alr-1	WBGene00044330	70.4323	-1.07616	0.261255	-4.1192	3.8019e-05	0.000866311
fbxb-20	WBGene00022559	24.5935	-1.67609	0.407077	-4.11738	3.83207e-05	0.000871854
tars-1	WBGene00006617	8672.01	0.372262	0.0904354	4.11633	3.84954e-05	0.000874497
bub-1	WBGene00000275	4928.28	-0.232541	0.0565017	-4.11565	3.86097e-05	0.00087576
fbn-1	WBGene00022816	327.624	-1.70637	0.414706	-4.11465	3.87768e-05	0.000878216
ZK858.6	WBGene00014119	3520.74	0.195611	0.0475451	4.11423	3.88471e-05	0.000878474
Y73E7A.2	WBGene00022269	556.813	0.369162	0.0897383	4.11376	3.89261e-05	0.000878928
hsp-6	WBGene00002010	18312.2	0.44964	0.109345	4.11212	3.92043e-05	0.000883873
ZK1236.1	WBGene00022862	823.985	0.354705	0.0862722	4.11147	3.93155e-05	0.000885043
trxr-2	WBGene00014028	316.88	0.464853	0.113175	4.10739	4.00155e-05	0.000899445
ric-4	WBGene00004364	159.392	-0.708756	0.172581	-4.1068	4.01181e-05	0.000900394
ubc-7	WBGene00006704	4104.65	0.301972	0.073618	4.10188	4.09808e-05	0.000918376
fem-2	WBGene00001412	2374.44	0.330592	0.0806926	4.09693	4.1866e-05	0.000936806
Y106G6D.1	WBGene00013698	74.5954	-1.1655	0.284565	-4.09574	4.20831e-05	0.000940255
tbc-2	WBGene00022880	3802.23	0.392675	0.0959549	4.09229	4.27134e-05	0.000952911
F22D6.2	WBGene00009050	7122.03	0.241029	0.0589104	4.09144	4.28697e-05	0.000954972
Y39A1A.22	WBGene00012659	2182.41	0.611769	0.149594	4.08952	4.32272e-05	0.000960323
lin-65	WBGene00022149	1791.15	0.56344	0.137779	4.08946	4.32387e-05	0.000960323
Y46G5A.28	WBGene00012916	58.144	-1.21639	0.297497	-4.08876	4.33678e-05	0.000961759
C26C6.9	WBGene00007743	142.746	-0.730754	0.178766	-4.08776	4.3555e-05	0.000963687
sdz-18	WBGene00018442	15.0034	-2.15044	0.526087	-4.08761	4.35838e-05	0.000963687
Y49E10.21	WBGene00013040	1283.32	0.398849	0.0977274	4.08124	4.47961e-05	0.000987588
vps-18	WBGene00021058	1235.82	0.452351	0.110837	4.08123	4.47971e-05	0.000987588
cogc-3	WBGene00022121	1403.61	0.266949	0.0654195	4.08057	4.49252e-05	0.00098895
fln-1	WBGene00022048	13695.6	0.503777	0.123489	4.07952	4.51294e-05	0.000991982
ule-1	WBGene00021005	2907.68	0.483687	0.118624	4.07749	4.55247e-05	0.000999199
egl-45	WBGene00001209	10588.2	0.375239	0.0920796	4.07515	4.59844e-05	0.00100781
gln-4	WBGene00001605	8.33224	5.11772	1.25614	4.07417	4.6179e-05	0.00101059
acs-19	WBGene00007969	8510.65	0.279513	0.0686133	4.07375	4.62622e-05	0.00101093
rpl-1	WBGene00004412	20894.6	0.233169	0.0572652	4.07174	4.66633e-05	0.0010182
Y57A10C.1	WBGene00013280	13.6028	-3.2493	0.798455	-4.06949	4.71171e-05	0.0010266
scav-3	WBGene00013039	1684.67	0.197309	0.0485156	4.06691	4.76405e-05	0.00103498
txdc-12.1	WBGene00013263	296.812	-0.762655	0.187511	-4.06724	4.75726e-05	0.00103498
bli-4	WBGene00000254	4616.59	0.311608	0.0766307	4.06636	4.77533e-05	0.00103593
glr-5	WBGene00001616	61.7137	-1.46992	0.361651	-4.06447	4.81424e-05	0.00103984
fbxb-88	WBGene00016359	41.3201	-1.62019	0.39862	-4.0645	4.81348e-05	0.00103984
ugt-57	WBGene00017154	49.8204	-1.86038	0.457718	-4.06447	4.81427e-05	0.00103984
rpl-24.1	WBGene00004436	22844.1	0.24508	0.0603124	4.06351	4.83394e-05	0.00104258
cutl-3	WBGene00008978	16.2535	-1.90706	0.46953	-4.06162	4.87328e-05	0.00104836
tsg-101	WBGene00015658	1676.06	0.337672	0.0831387	4.06155	4.8748e-05	0.00104836
tig-2	WBGene00006570	78.1296	-0.762265	0.18771	-4.06086	4.88922e-05	0.00104844
cyp-31A3	WBGene00021200	1563.45	0.266559	0.0656377	4.06107	4.88492e-05	0.00104844
acly-2	WBGene00007150	9078.36	0.318065	0.078346	4.05975	4.91243e-05	0.00105191
Y54G2A.21	WBGene00021886	339.232	0.500632	0.123327	4.0594	4.91989e-05	0.001052
hil-3	WBGene00001854	584.634	-1.07786	0.265769	-4.05562	5.00018e-05	0.00106764
C29H12.2	WBGene00016235	4152.56	0.25184	0.0621057	4.05502	5.01304e-05	0.00106885
mmcm-1	WBGene00014202	3633.87	0.228295	0.0563298	4.05283	5.06028e-05	0.00107738
crp-1	WBGene00012532	77.1255	-1.08301	0.267259	-4.05229	5.07194e-05	0.00107833
ekl-6	WBGene00011806	2409.27	0.380452	0.0939917	4.04772	5.17199e-05	0.00109804
alh-1	WBGene00000107	5091.69	0.268243	0.066287	4.04668	5.19481e-05	0.00110131
Y56A3A.16	WBGene00013235	1796.86	0.372728	0.0921222	4.04602	5.20963e-05	0.00110289
C40H1.7	WBGene00008042	78.0453	-1.29612	0.320403	-4.04528	5.22612e-05	0.00110465
sodh-1	WBGene00010790	429.851	0.868162	0.214627	4.04498	5.23276e-05	0.00110465
bath-42	WBGene00016803	5247.24	0.215934	0.0533899	4.04447	5.24408e-05	0.00110514
fbxc-22	WBGene00019041	21.2924	-2.32252	0.574283	-4.04421	5.24988e-05	0.00110514
dao-2	WBGene00000928	200.927	-1.4373	0.355454	-4.04355	5.26475e-05	0.00110532
R08E5.1	WBGene00019961	25.0881	-1.33529	0.33023	-4.04352	5.26556e-05	0.00110532
nlp-47	WBGene00018117	65.3669	-0.970199	0.24004	-4.04183	5.30368e-05	0.00111176
T03D8.6	WBGene00011393	358.077	-0.542284	0.134184	-4.04134	5.3147e-05	0.00111251
C04E6.11	WBGene00015425	1474.03	0.39491	0.0977284	4.04089	5.32488e-05	0.00111308
sao-1	WBGene00011195	5432.37	0.319761	0.0791378	4.04056	5.33245e-05	0.0011131
T09B4.8	WBGene00020382	629.968	-0.513903	0.127206	-4.03993	5.34665e-05	0.00111451
Y41E3.1	WBGene00012762	2623.33	0.248541	0.0615347	4.03904	5.367e-05	0.00111719
C01G6.4	WBGene00007226	835.109	0.31781	0.0787675	4.03479	5.46506e-05	0.00113602
Y82E9BR.19	WBGene00022351	990.651	0.585346	0.145108	4.03386	5.48685e-05	0.00113896
rab-8	WBGene00004272	1422.13	0.282489	0.0700391	4.03331	5.49972e-05	0.00113968
idhg-1	WBGene00009440	3909.73	0.230729	0.0572095	4.03306	5.50557e-05	0.00113968
T22C8.6	WBGene00011927	13.0463	-2.23948	0.55543	-4.03198	5.53094e-05	0.00114334
che-12	WBGene00000491	25.8166	-2.35294	0.583813	-4.03029	5.57072e-05	0.00114958
K02E7.6	WBGene00019311	73.8418	-1.65391	0.410394	-4.03005	5.57652e-05	0.00114958
W03G11.4	WBGene00012226	339.661	-0.901357	0.223714	-4.02906	5.60002e-05	0.00115283
Y71F9AL.1	WBGene00022107	699.863	0.355679	0.0882913	4.02847	5.61417e-05	0.00115415
F15B10.3	WBGene00017481	80.944	-1.17812	0.292639	-4.02585	5.67708e-05	0.00116548
sup-17	WBGene00006324	4975.74	0.22463	0.0558091	4.02497	5.69815e-05	0.0011666
unc-87	WBGene00006819	9235.37	0.426775	0.106026	4.0252	5.69279e-05	0.0011666
F45D3.4	WBGene00009724	367.022	0.655219	0.162841	4.02367	5.7298e-05	0.00117147
tbx-11	WBGene00006547	73.3232	-1.30011	0.323219	-4.02237	5.76158e-05	0.00117618
R166.2	WBGene00011302	2088.14	0.29135	0.0724375	4.02208	5.76858e-05	0.00117618
C24H12.1	WBGene00016071	37.045	-1.83448	0.456223	-4.02102	5.79467e-05	0.00117988
cab-1	WBGene00000277	1148.95	-0.436542	0.108615	-4.01915	5.84093e-05	0.00118768
W01A8.6	WBGene00012168	41.3366	-1.45945	0.363381	-4.01631	5.91153e-05	0.0012004
ikke-1	WBGene00011299	3611.48	0.300662	0.0748914	4.01464	5.95368e-05	0.00120732
nphp-4	WBGene00011261	29.6428	-1.8893	0.47078	-4.01313	5.99194e-05	0.00121343
cyp-31A1	WBGene00000374	194.418	-0.59846	0.149164	-4.01209	6.01823e-05	0.00121612
pes-10	WBGene00003983	72.2806	-1.08661	0.270843	-4.01197	6.02151e-05	0.00121612
lonp-1	WBGene00016391	3297.66	0.272927	0.0680639	4.00986	6.07545e-05	0.00122535
F19F10.11	WBGene00017607	2317.36	0.456499	0.113865	4.00912	6.09448e-05	0.00122753
C44E4.5	WBGene00016654	1346.3	0.275254	0.068676	4.00801	6.12315e-05	0.00123164
cdc-48.2	WBGene00008053	11596.3	0.377457	0.094207	4.00668	6.15781e-05	0.00123532
spas-1	WBGene00016045	2378.86	0.236017	0.0589059	4.00667	6.15796e-05	0.00123532
C27A12.9	WBGene00016159	883.111	0.30807	0.0769018	4.00602	6.17499e-05	0.00123707
H10E21.5	WBGene00019185	51.0267	-1.06201	0.265172	-4.00499	6.20191e-05	0.00124031
T22D1.3	WBGene00020682	3250.29	0.195118	0.0487214	4.00477	6.20779e-05	0.00124031
ubc-15	WBGene00006710	1205.73	0.356583	0.0890842	4.00276	6.26067e-05	0.0012492
C53D6.4	WBGene00008281	778.817	0.267143	0.0667651	4.00123	6.30134e-05	0.00125244
Y64G10A.7	WBGene00013416	127.911	-0.993491	0.24826	-4.00182	6.28569e-05	0.00125244
folt-2	WBGene00018138	8054.06	-0.344382	0.0860697	-4.00121	6.30206e-05	0.00125244
EEED8.10	WBGene00017138	1913.32	0.260706	0.0652258	3.99698	6.41561e-05	0.00127331
Y102A5C.6	WBGene00014955	424.886	0.322869	0.0808943	3.99124	6.57275e-05	0.00130277
nhr-183	WBGene00018266	30.4304	-1.35847	0.340579	-3.9887	6.64353e-05	0.00131331
ddx-27	WBGene00022148	1959.12	0.408651	0.102447	3.98889	6.63819e-05	0.00131331
lin-26	WBGene00003012	2288.71	0.286479	0.0718406	3.9877	6.67169e-05	0.00131615
Y48A6C.4	WBGene00012977	1352.31	0.299081	0.0750036	3.98756	6.67554e-05	0.00131615
F48E8.3	WBGene00018610	1536.38	0.217059	0.054467	3.98515	6.7437e-05	0.00132783
atf-7	WBGene00000223	4803.69	0.227354	0.0570891	3.98245	6.82086e-05	0.00134126
cogc-2	WBGene00000585	1945.91	0.31228	0.0784353	3.98137	6.852e-05	0.00134561
ufl-1	WBGene00015555	2049.27	0.212056	0.0532673	3.98097	6.86335e-05	0.00134606
T23B3.1	WBGene00020709	1861.34	0.18781	0.0471814	3.9806	6.87411e-05	0.00134641
Y41C4A.9	WBGene00012756	913.415	0.371546	0.0933512	3.98009	6.88896e-05	0.00134648
fbxb-15	WBGene00022557	38.5222	-1.47599	0.370855	-3.97997	6.89252e-05	0.00134648
odr-8	WBGene00018160	2440.72	0.220333	0.0553924	3.97768	6.95917e-05	0.00135772
T05E7.3	WBGene00020259	2387.55	0.293816	0.0738971	3.97601	7.00807e-05	0.00136548
unc-39	WBGene00006775	30.4534	-3.67103	0.923659	-3.97444	7.05439e-05	0.00137271
T24D1.3	WBGene00011986	3421	0.420253	0.105808	3.97184	7.132e-05	0.001386
mob-4	WBGene00016238	2403.91	0.304582	0.0767333	3.96935	7.20676e-05	0.00139871
rpl-20	WBGene00004432	18630.8	0.265475	0.0668973	3.9684	7.23576e-05	0.00140252
tceb-3	WBGene00010990	1927.53	0.240272	0.0605683	3.96696	7.27955e-05	0.00140759
npl-4.1	WBGene00019120	2842.57	0.190266	0.0479632	3.96692	7.2808e-05	0.00140759
pho-14	WBGene00020471	986.369	0.358738	0.0904819	3.96475	7.34734e-05	0.00141862
Y45G5AM.5	WBGene00021557	32.5297	-1.73329	0.437559	-3.96126	7.45557e-05	0.00143765
dop-2	WBGene00001053	40.7655	-1.23125	0.310978	-3.95927	7.51786e-05	0.00144407
idha-1	WBGene00009664	4111.57	0.283343	0.0715549	3.9598	7.50137e-05	0.00144407
F55A12.5	WBGene00018864	2790.53	0.233189	0.0588929	3.95955	7.50913e-05	0.00144407
prx-19	WBGene00004201	1549.28	0.300918	0.0760595	3.95635	7.61035e-05	0.00145995
fard-1	WBGene00022200	960.771	-0.365125	0.0923131	-3.95529	7.64418e-05	0.00146456
rpl-16	WBGene00004428	24526.6	0.224546	0.0567814	3.95457	7.66739e-05	0.00146712
lars-1	WBGene00003073	7065	0.246417	0.0623372	3.95296	7.71896e-05	0.00147322
ZC116.3	WBGene00013855	150.094	-0.934054	0.236289	-3.95301	7.71729e-05	0.00147322
F34D6.1	WBGene00018021	28.1746	-1.96464	0.49735	-3.95022	7.80785e-05	0.00148828
F40G12.11	WBGene00009606	1057.24	0.298916	0.0756894	3.94924	7.84001e-05	0.00149171
acin-1	WBGene00016601	2548.23	0.178602	0.0452265	3.94906	7.84587e-05	0.00149171
spp-23	WBGene00021335	133.073	-0.753672	0.190981	-3.94632	7.93608e-05	0.00150695
nhr-181	WBGene00018189	144.146	1.34112	0.339877	3.94591	7.94973e-05	0.00150762
icd-2	WBGene00022042	10882.2	0.168325	0.0426878	3.94317	8.04106e-05	0.00152301
F59E12.6	WBGene00019122	658.655	0.513202	0.130224	3.9409	8.11769e-05	0.00153557
M01H9.3	WBGene00019719	2796.35	0.240672	0.0611236	3.93747	8.2344e-05	0.00155568
tbx-43	WBGene00044798	19.328	-2.65864	0.675302	-3.93697	8.25159e-05	0.00155695
nxf-1	WBGene00003834	2697.62	0.368347	0.093607	3.93504	8.31839e-05	0.00156594
rpn-6.1	WBGene00004462	3744.25	0.229461	0.0583143	3.93489	8.32335e-05	0.00156594
F07C3.2	WBGene00017193	26.2718	-1.60385	0.407636	-3.93451	8.33672e-05	0.00156594
T24C12.3	WBGene00020765	300.34	-0.463285	0.117753	-3.93438	8.34118e-05	0.00156594
smg-3	WBGene00004881	2372.5	0.335059	0.0852048	3.93239	8.41041e-05	0.00157695
F53H4.6	WBGene00010011	258.285	0.503823	0.128193	3.9302	8.48748e-05	0.00158941
Y51A2D.7	WBGene00013075	955.256	0.505792	0.128724	3.92927	8.52053e-05	0.0015936
Y53F4B.21	WBGene00013167	487.211	0.80129	0.203965	3.92857	8.54507e-05	0.00159619
phb-1	WBGene00004014	5966.7	0.200821	0.0511325	3.92746	8.58477e-05	0.00159746
cyp-42A1	WBGene00013585	66.8245	-1.04925	0.267116	-3.92806	8.56341e-05	0.00159746
zipt-2.1	WBGene00014669	203.436	-0.602321	0.153372	-3.92718	8.59468e-05	0.00159746
Y92H12BL.4	WBGene00022365	113.055	0.660395	0.168142	3.92761	8.57927e-05	0.00159746
ceh-18	WBGene00000441	172.391	-0.6076	0.154775	-3.92569	8.64815e-05	0.00160383
ZK550.3	WBGene00013997	3263.55	0.375212	0.0955803	3.92563	8.65048e-05	0.00160383
algn-10	WBGene00007043	681.769	0.271647	0.0692157	3.92465	8.68577e-05	0.00160439
T11G6.3	WBGene00011718	99.3668	-0.980029	0.249703	-3.92478	8.68103e-05	0.00160439
T16G12.6	WBGene00011807	2058.98	0.323859	0.0825171	3.92475	8.68214e-05	0.00160439
abce-1	WBGene00012714	4243.15	0.226724	0.0577796	3.92395	8.71075e-05	0.00160702
W02D9.10	WBGene00012216	181.988	0.699771	0.17844	3.92159	8.79658e-05	0.00162085
T19A5.3	WBGene00020554	99.8978	-1.57021	0.400775	-3.91793	8.93131e-05	0.00164365
eftu-2	WBGene00001166	5617.77	0.213139	0.0544125	3.91709	8.96255e-05	0.0016465
lis-1	WBGene00003047	2601.08	0.471661	0.120416	3.91692	8.96885e-05	0.0016465
W01D2.3	WBGene00012180	23.8287	5.16801	1.31988	3.91552	9.02083e-05	0.001654
vps-16	WBGene00006516	1567.65	0.329968	0.0842946	3.91446	9.06074e-05	0.00165789
ubc-13	WBGene00006708	2156.51	0.234497	0.0599067	3.91436	9.06426e-05	0.00165789
C33A12.4	WBGene00007883	48.3627	-1.30272	0.332862	-3.91369	9.08976e-05	0.00166052
Y11D7A.3	WBGene00012428	674.254	-0.549379	0.140448	-3.91161	9.16834e-05	0.00167283
tba-1	WBGene00006528	16186.6	0.322723	0.0826154	3.90633	9.37077e-05	0.00170768
R03D7.3	WBGene00014814	178.62	1.28622	0.329317	3.90571	9.39477e-05	0.00170788
igcm-2	WBGene00020130	26.6068	-2.05316	0.525662	-3.90586	9.38925e-05	0.00170788
pfn-1	WBGene00003989	5261.69	0.223936	0.0573526	3.90456	9.43973e-05	0.00171396
ost-1	WBGene00003893	5683.72	0.399612	0.102442	3.90085	9.58559e-05	0.00173833
rtel-1	WBGene00009124	1876.06	0.304067	0.0779739	3.8996	9.63511e-05	0.00174308
C09D4.4	WBGene00015635	2486.24	0.35306	0.0905362	3.89965	9.633e-05	0.00174308
elo-9	WBGene00001247	121.639	-0.604302	0.154982	-3.89918	9.65186e-05	0.001744
nlp-8	WBGene00003746	79.5961	-0.845305	0.216987	-3.89565	9.79376e-05	0.0017675
dpt-1	WBGene00008532	3019	0.183734	0.0471732	3.89489	9.82445e-05	0.00177089
F33E2.5	WBGene00009361	185.488	-0.970366	0.249337	-3.89178	9.95105e-05	0.00179155
C34C6.4	WBGene00007917	928.739	0.329728	0.0847645	3.88993	0.000100272	0.00180309
C09F9.2	WBGene00007479	379.837	-1.56273	0.401913	-3.88823	0.000100979	0.00181361
rfc-3	WBGene00004339	3150.86	0.200101	0.0514694	3.88776	0.000101173	0.00181491
F33H1.3	WBGene00009364	2135.01	0.355375	0.0914658	3.88533	0.000102193	0.001831
Y53F4B.10	WBGene00013157	13.1272	2.59529	0.668227	3.88385	0.000102815	0.00183775
C23H5.8	WBGene00016027	2089.13	-0.459337	0.118263	-3.88403	0.00010274	0.00183775
pph-4.1	WBGene00004085	1088.29	0.309575	0.0797274	3.88291	0.000103212	0.00184043
C35E7.5	WBGene00016457	1179.49	-0.865086	0.222791	-3.88295	0.000103196	0.00184043
wdr-23	WBGene00008419	2100.82	0.260281	0.0670461	3.88212	0.000103551	0.00184427
F21D5.1	WBGene00009006	4481.76	0.25608	0.0660078	3.87955	0.00010465	0.00185941
lgc-55	WBGene00013746	22.9619	-1.4874	0.383369	-3.87982	0.000104533	0.00185941
F58B4.3	WBGene00010236	24.1816	-1.55445	0.400747	-3.87888	0.00010494	0.00186013
Y95B8A.8	WBGene00022388	2681.56	0.382929	0.0987199	3.87894	0.000104911	0.00186013
dma-1	WBGene00011345	57.4771	-1.73327	0.446965	-3.87787	0.000105376	0.00186564
rbg-2	WBGene00004318	2064.67	0.37238	0.0960355	3.87752	0.000105525	0.00186607
eif-3.J	WBGene00012738	1968.45	0.481525	0.124247	3.87556	0.000106381	0.0018775
T13C2.6	WBGene00020481	6586.65	0.287254	0.0741213	3.87546	0.000106423	0.0018775
ebp-3	WBGene00007062	14.2695	-18.2551	4.71391	-3.87261	0.000107677	0.00189738
rpom-1	WBGene00013680	1590.25	0.276195	0.071333	3.87191	0.000107984	0.00190055
rpa-2	WBGene00019767	3160.28	0.17873	0.0461659	3.87148	0.000108179	0.00190173
F45C12.17	WBGene00269388	17.0067	-2.39195	0.617944	-3.87082	0.00010847	0.0019046
F54C9.11	WBGene00010045	63.7185	-1.04095	0.268945	-3.8705	0.000108613	0.00190488
C05D2.10	WBGene00015470	2014.39	0.197593	0.0510618	3.86968	0.000108977	0.00190901
zipt-11	WBGene00019077	1321.1	0.23716	0.061295	3.86916	0.00010921	0.00191086
rab-33	WBGene00004283	805.765	0.26467	0.068414	3.86865	0.000109439	0.00191209
ZK829.7	WBGene00014096	2724.85	0.301749	0.0780028	3.86843	0.000109537	0.00191209
Y57E12AL.1	WBGene00021956	3346.41	0.244943	0.0633778	3.86481	0.000111174	0.00193841
kel-20	WBGene00020030	1110.75	0.285485	0.0738828	3.86402	0.000111535	0.00194243
pdf-1	WBGene00020317	202.439	-0.64631	0.167306	-3.86304	0.000111986	0.00194801
aly-2	WBGene00000121	3821.61	0.230137	0.0595989	3.86143	0.000112723	0.00195461
abcf-3	WBGene00018339	4196.18	0.240646	0.0623217	3.86136	0.000112758	0.00195461
gadr-4	WBGene00021053	39.6857	-1.5008	0.388634	-3.86174	0.000112583	0.00195461
W10D9.2	WBGene00021130	10.2834	-5.16999	1.33958	-3.8594	0.000113666	0.00196806
utp-20	WBGene00007050	2779.74	0.539839	0.139906	3.8586	0.000114041	0.00197226
bath-10	WBGene00021726	54.2684	-1.41417	0.366534	-3.85823	0.000114213	0.00197295
nhr-67	WBGene00003657	22.7486	-2.77419	0.719498	-3.85573	0.000115384	0.00199087
rae-1	WBGene00003803	2586.64	0.16834	0.0436983	3.85232	0.000117004	0.00201194
ran-3	WBGene00004304	6045.86	0.332355	0.086267	3.85264	0.000116853	0.00201194
ubl-1	WBGene00006725	16510.2	0.253905	0.0659099	3.85231	0.000117009	0.00201194
pro-1	WBGene00004185	892.64	0.32817	0.0851999	3.85177	0.000117269	0.00201408
usp-50	WBGene00008441	1035.35	0.373092	0.0969329	3.84897	0.000118615	0.00203224
gla-3	WBGene00011376	3520.72	0.535196	0.139058	3.84872	0.000118734	0.00203224
hip-1	WBGene00011735	5176.96	0.214826	0.0558139	3.84897	0.000118618	0.00203224
fbxc-12	WBGene00045298	10.6031	-5.36748	1.39519	-3.84713	0.00011951	0.00204318
T10C6.6	WBGene00011688	1397.31	0.254635	0.0662126	3.84571	0.000120202	0.00205264
Y37E11AM.2	WBGene00021366	589.05	0.445981	0.115994	3.84486	0.000120619	0.00205742
nhr-69	WBGene00003659	247.847	-0.519302	0.135117	-3.84335	0.000121368	0.00205777
ulp-4	WBGene00006739	4371.66	0.554966	0.144397	3.84334	0.000121371	0.00205777
alh-13	WBGene00011938	466.475	-0.510421	0.132822	-3.84289	0.000121596	0.00205777
Y48G10A.3	WBGene00013020	1265.8	0.260979	0.0679079	3.84314	0.000121472	0.00205777
C07D8.6	WBGene00015565	3532.05	0.205508	0.0534779	3.84287	0.000121605	0.00205777
C16C8.13	WBGene00015851	106.852	0.580986	0.151144	3.84391	0.000121088	0.00205777
cutc-1	WBGene00022702	1281.96	0.252204	0.0656204	3.84338	0.000121353	0.00205777
Y57G11C.33	WBGene00013323	696.656	0.30091	0.0783958	3.83834	0.000123868	0.0020929
ZK688.5	WBGene00022800	5790.07	0.423311	0.11029	3.83816	0.000123961	0.0020929
inx-6	WBGene00002128	42.2532	-1.426	0.371939	-3.83395	0.000126102	0.00212664
pfk-1.1	WBGene00022199	2076.01	0.492125	0.128378	3.83341	0.000126381	0.00212893
R05F9.11	WBGene00019894	404.547	0.575593	0.150196	3.83228	0.000126963	0.00213634
K02B12.2	WBGene00010495	98.9691	-1.06045	0.276792	-3.83123	0.000127505	0.00214304
gfat-1	WBGene00008546	10374.8	0.433527	0.113193	3.82998	0.000128155	0.00215154
ncx-6	WBGene00003571	53.9213	-1.05788	0.276281	-3.82898	0.000128674	0.00215782
twk-18	WBGene00006672	420.783	0.414008	0.108164	3.82761	0.000129394	0.00216633
C35A5.8	WBGene00007952	6906.22	0.234671	0.0613124	3.82746	0.000129472	0.00216633
atl-1	WBGene00000226	3658.22	-0.239248	0.0625329	-3.82596	0.000130261	0.0021741
peb-1	WBGene00003968	75.3094	-1.35457	0.35405	-3.82593	0.000130282	0.0021741
sdz-11	WBGene00017408	14.1455	-2.53621	0.66293	-3.82575	0.000130373	0.0021741
Y51F10.2	WBGene00021763	4499.36	0.331085	0.0865536	3.8252	0.000130668	0.00217658
C09G1.5	WBGene00007487	27.8546	-1.48075	0.387204	-3.8242	0.000131196	0.00218031
T04F8.2	WBGene00011441	580.848	-0.345126	0.0902444	-3.82434	0.00013112	0.00218031
F53G2.1	WBGene00018766	19.8402	-2.01137	0.525992	-3.82395	0.00013133	0.00218031
ears-1	WBGene00001337	7025.44	0.444077	0.116178	3.82239	0.000132167	0.00219176
dbt-1	WBGene00014054	2672.77	0.252353	0.066033	3.82161	0.000132583	0.00219623
fbxb-98	WBGene00015830	14.4486	-3.0674	0.802815	-3.8208	0.000133018	0.00219883
Y57G7A.2	WBGene00021966	35.5811	-1.27911	0.334779	-3.82077	0.000133035	0.00219883
nol-14	WBGene00021660	1206.03	0.487199	0.127527	3.82036	0.000133259	0.00220011
inx-1	WBGene00002123	135.776	-0.666926	0.1747	-3.81756	0.000134779	0.00222274
skr-14	WBGene00004820	149.673	-0.733028	0.192308	-3.81173	0.000137996	0.00227163
fbxb-68	WBGene00008611	13.2256	-2.33221	0.611866	-3.81164	0.000138048	0.00227163
rpt-1	WBGene00004501	6014.37	0.277024	0.0727246	3.80922	0.000139406	0.00228893
mdt-17	WBGene00007017	3202.63	0.314793	0.0826359	3.8094	0.000139302	0.00228893
F36A2.7	WBGene00009454	5130.82	0.185644	0.0487471	3.80831	0.000139922	0.00229236
crml-1	WBGene00010641	5580.31	0.273685	0.0718602	3.80857	0.00013977	0.00229236
cdc-26	WBGene00015235	1521.09	0.231037	0.0606932	3.80664	0.00014087	0.00230535
pam-1	WBGene00003914	9244.05	0.184769	0.0485424	3.80633	0.000141043	0.00230566
aap-1	WBGene00000001	1633.47	0.26967	0.0708763	3.8048	0.00014192	0.00231746
fbxb-44	WBGene00019416	21.9451	-1.88727	0.496082	-3.80435	0.000142178	0.00231913
rpn-3	WBGene00004460	7696.68	0.163194	0.0429079	3.80335	0.00014275	0.00232546
F49C12.9	WBGene00009878	2071.18	0.315004	0.082828	3.80311	0.000142894	0.00232546
F13H8.11	WBGene00017443	67.2869	-0.811152	0.213315	-3.80259	0.000143189	0.00232546
F56F10.2	WBGene00018985	51.0671	-1.05291	0.276884	-3.80273	0.000143109	0.00232546
stip-1	WBGene00007412	2039.29	0.209425	0.0550853	3.80183	0.000143631	0.0023301
Y43B11AL.1	WBGene00021542	36.0433	-1.59149	0.418719	-3.80086	0.000144194	0.00233669
ubr-4	WBGene00016650	5287.47	0.519047	0.136673	3.79772	0.000146032	0.00236392
fbxb-1	WBGene00012063	8.74375	-4.86213	1.28048	-3.79712	0.000146387	0.00236453
bath-31	WBGene00017405	36.9976	-1.40805	0.370816	-3.79716	0.000146364	0.00236453
rps-6	WBGene00004475	22555.1	0.291899	0.0769009	3.79579	0.000147176	0.0023747
mrps-10	WBGene00012556	517.199	0.328654	0.0866269	3.7939	0.0001483	0.00239025
cps-6	WBGene00000787	944.458	0.204261	0.0538444	3.79355	0.000148512	0.00239109
M116.5	WBGene00019792	1802.92	0.389976	0.102811	3.79313	0.000148759	0.00239249
lin-12	WBGene00003001	189.394	-0.777099	0.204937	-3.79189	0.000149505	0.00239932
mls-2	WBGene00003377	25.8328	-2.23825	0.590264	-3.79194	0.000149475	0.00239932
lat-1	WBGene00002251	5241.37	0.401886	0.106021	3.79063	0.000150265	0.00240591
ptr-1	WBGene00004216	77.6308	-1.06815	0.281839	-3.78992	0.000150695	0.00240591
rpl-3	WBGene00004414	63176.5	0.178115	0.0469976	3.78988	0.000150722	0.00240591
F32A11.5	WBGene00009310	49.3792	-0.972686	0.256641	-3.79007	0.000150608	0.00240591
F17A9.2	WBGene00017534	2060.31	0.262786	0.0693311	3.7903	0.000150466	0.00240591
unc-50	WBGene00006785	1283.46	0.389828	0.102914	3.78791	0.000151918	0.00241525
acs-11	WBGene00018269	1217.01	0.445997	0.117744	3.78785	0.000151955	0.00241525
Y23H5B.1	WBGene00021272	19.4178	-1.7331	0.457532	-3.78792	0.000151913	0.00241525
mpst-5	WBGene00022006	60.3635	-11.2507	2.96984	-3.78832	0.000151667	0.00241525
aak-1	WBGene00019801	1009.64	0.278944	0.0736708	3.78636	0.000152871	0.00242724
clec-57	WBGene00008594	105.218	-0.811307	0.214313	-3.78562	0.000153324	0.00243184
gpb-2	WBGene00001680	177.024	-0.714019	0.188638	-3.78513	0.000153631	0.00243412
Y63D3A.8	WBGene00013407	1032.7	0.447904	0.118389	3.78333	0.000154746	0.00244737
F36H5.13	WBGene00206519	16.5836	-2.55919	0.676454	-3.78325	0.000154795	0.00244737
sulp-7	WBGene00012259	159.611	-0.641175	0.169581	-3.78095	0.000156233	0.00246749
nlp-10	WBGene00003748	95.7865	-0.781351	0.206704	-3.78006	0.000156793	0.00247371
Y55F3BR.1	WBGene00021938	1808.69	0.282151	0.0746898	3.77764	0.000158323	0.00249522
lip-1	WBGene00003043	2184.57	0.398827	0.10559	3.77712	0.000158651	0.00249775
nra-1	WBGene00012128	2103.23	0.366459	0.0970658	3.77537	0.000159771	0.00251273
hpo-20	WBGene00022447	491.532	0.683953	0.181184	3.7749	0.000160069	0.00251477
ptp-4	WBGene00010558	64.7713	-1.1197	0.296898	-3.77131	0.000162392	0.00254858
air-1	WBGene00000098	3603.24	0.203521	0.0539742	3.77071	0.000162781	0.002551
lin-53	WBGene00003036	5543.47	0.251061	0.0665846	3.77055	0.000162888	0.002551
F23D12.2	WBGene00009086	365.57	0.567426	0.150566	3.76862	0.000164151	0.00256808
F35D2.3	WBGene00018041	82.1612	-1.19331	0.316689	-3.76808	0.000164508	0.00257098
uig-1	WBGene00009337	284.642	-0.676511	0.17955	-3.76781	0.000164686	0.00257106
pitr-1	WBGene00016739	5161.28	0.362201	0.0961534	3.76691	0.000165281	0.00257765
viln-1	WBGene00015691	1931.68	0.354586	0.0941406	3.76656	0.000165514	0.0025786
F40F9.5	WBGene00009582	189.507	-0.618199	0.164167	-3.76567	0.000166102	0.00258506
rilp-1	WBGene00007860	1609.12	0.254618	0.0676953	3.76124	0.000169076	0.00262861
sam-4	WBGene00019126	1390.41	0.222446	0.0592024	3.75738	0.000171703	0.00266667
let-92	WBGene00002363	6777.71	0.136752	0.0364037	3.75654	0.000172276	0.00267279
F33E11.3	WBGene00018011	1890.42	0.325451	0.0866512	3.75587	0.00017274	0.0026772
catp-7	WBGene00022010	791.168	-0.495374	0.131945	-3.75439	0.000173763	0.00269026
AC8.10	WBGene00043988	163.278	-1.59969	0.426138	-3.75392	0.000174093	0.00269259
dod-19	WBGene00022644	1915.78	-0.747305	0.199165	-3.75218	0.000175302	0.00270847
W02D3.4	WBGene00020933	1821.19	0.166126	0.0442976	3.75023	0.000176673	0.00272682
C14A11.2	WBGene00015748	16.1776	-2.66028	0.709582	-3.74907	0.000177488	0.00273659
mdt-8	WBGene00007013	1658.72	0.205181	0.0547662	3.74649	0.00017933	0.00275927
F58G1.2	WBGene00010264	1202.68	0.343586	0.0917049	3.74664	0.000179216	0.00275927
mrps-22	WBGene00007564	1454.38	0.24534	0.0654917	3.74613	0.000179582	0.00276031
F13H10.5	WBGene00008776	46.0089	-1.25396	0.334893	-3.74436	0.000180855	0.00277701
fbxb-10	WBGene00020362	13.9874	-3.62417	0.96826	-3.74297	0.000181858	0.00278955
mir-8199	WBGene00016553	14.5111	-4.80254	1.28353	-3.74167	0.000182799	0.0028011
C34B4.2	WBGene00007907	960.414	0.387903	0.103702	3.74057	0.000183604	0.00280636
F14B6.3	WBGene00008784	99.5123	-1.11707	0.298649	-3.74043	0.000183709	0.00280636
F54D5.9	WBGene00010053	1953.71	0.438262	0.117172	3.74032	0.000183786	0.00280636
hrde-2	WBGene00011324	1255.14	0.281887	0.0753674	3.74017	0.000183894	0.00280636
unc-71	WBGene00006804	3713.98	0.416048	0.111258	3.73948	0.000184402	0.00281123
R03D7.2	WBGene00010989	702.259	0.408835	0.109351	3.73874	0.000184943	0.00281661
mrg-1	WBGene00003406	3642.37	0.171937	0.0459999	3.73777	0.000185662	0.00282185
C15A11.7	WBGene00007599	142.167	-0.635342	0.169979	-3.73776	0.000185666	0.00282185
cid-1	WBGene00019629	4465.12	0.349868	0.0936341	3.73654	0.00018657	0.00283271
pigv-1	WBGene00020375	5347.95	0.281084	0.0752518	3.73524	0.000187537	0.00284451
dhs-18	WBGene00000981	224.096	-0.552718	0.148013	-3.73426	0.000188269	0.0028512
cccp-1	WBGene00013042	158.005	-0.572297	0.153261	-3.73414	0.000188361	0.0028512
VC5.2	WBGene00020908	190.877	-0.494069	0.132369	-3.73251	0.000189583	0.0028668
rpl-7	WBGene00004418	37489.1	0.187222	0.0501697	3.73177	0.000190141	0.00287232
aakg-5	WBGene00011276	1571.3	0.388195	0.104046	3.731	0.000190719	0.00287814
lon-8	WBGene00013352	67.2645	-1.01609	0.2724	-3.73013	0.000191382	0.00288523
mnp-1	WBGene00007139	271.586	-0.963195	0.258298	-3.72901	0.000192234	0.00289223
tfbm-1	WBGene00020189	457.093	0.32664	0.0875942	3.72901	0.000192233	0.00289223
ipgm-1	WBGene00019001	4128.45	0.249795	0.0670302	3.72661	0.000194074	0.00291697
ham-2	WBGene00001821	85.76	-0.992376	0.266441	-3.72456	0.000195659	0.00293784
pdpr-1	WBGene00013718	2572.55	0.344455	0.0925157	3.72321	0.000196707	0.0029506
Y71G12B.10	WBGene00022150	1188.83	0.231842	0.0622741	3.72293	0.000196927	0.00295093
H04M03.3	WBGene00019153	623.165	0.345704	0.0928976	3.72135	0.000198163	0.00296648
gadr-5	WBGene00045058	71.0003	-1.0097	0.271441	-3.71978	0.000199395	0.00298193
dnj-5	WBGene00001023	8794.02	0.321464	0.0864659	3.71782	0.000200952	0.00300221
aat-9	WBGene00000010	1247.97	0.323643	0.0870686	3.7171	0.00020152	0.00300768
T19D12.6	WBGene00020581	1145.38	-0.362216	0.0974867	-3.71554	0.00020277	0.0030203
F56F4.8	WBGene00045498	55.888	-1.17077	0.315093	-3.71564	0.000202692	0.0030203
nas-20	WBGene00003539	367.779	-0.772748	0.208096	-3.71341	0.000204482	0.00304277
mek-2	WBGene00003186	1400.6	0.266938	0.0719284	3.71116	0.000206314	0.0030612
oma-1	WBGene00003864	6492.06	0.190733	0.0513948	3.71113	0.000206336	0.0030612
Y6B3B.4	WBGene00012389	2291.89	0.453841	0.122281	3.71147	0.000206058	0.0030612
F58H1.5	WBGene00010288	85.6777	-0.991759	0.267349	-3.7096	0.000207591	0.0030737
Y106G6H.1	WBGene00013716	194.932	-0.772988	0.208363	-3.70982	0.000207408	0.0030737
tba-2	WBGene00006529	24788.2	0.244782	0.0660065	3.70845	0.000208533	0.00308459
aat-2	WBGene00000003	124.419	-0.687511	0.185444	-3.70738	0.000209418	0.00308753
cts-1	WBGene00000833	13541.1	0.183319	0.0494495	3.70721	0.000209559	0.00308753
ndx-7	WBGene00003584	489.906	0.404457	0.109083	3.70779	0.000209079	0.00308753
Y92H12BL.1	WBGene00022363	1349	0.439516	0.118545	3.70758	0.000209248	0.00308753
F55F10.1	WBGene00018898	5508.6	0.736502	0.198815	3.70446	0.000211844	0.00311812
Y47D3B.6	WBGene00012942	114.531	1.55399	0.419592	3.70358	0.000212575	0.00312579
him-14	WBGene00001872	914.309	0.259315	0.0700303	3.70289	0.000213157	0.00313127
dlst-1	WBGene00020950	5962.31	0.342371	0.092514	3.70075	0.000214965	0.00315472
ent-4	WBGene00008123	214.018	-0.713014	0.192734	-3.69948	0.000216043	0.00316454
trxr-1	WBGene00015553	3123.06	0.225231	0.0608821	3.69946	0.000216058	0.00316454
ptr-23	WBGene00004237	303.437	-0.468166	0.126591	-3.69825	0.000217092	0.00317656
phf-14	WBGene00013339	1039.63	0.275346	0.0744719	3.69731	0.000217893	0.00318517
heri-1	WBGene00016236	770.141	0.348884	0.0944099	3.69542	0.000219525	0.00320587
unc-18	WBGene00006757	882.474	-0.280587	0.075965	-3.69363	0.000221072	0.00322532
aqp-10	WBGene00000178	534.049	-0.483796	0.131005	-3.69295	0.000221667	0.00323084
rop-1	WBGene00004405	2517.48	0.21224	0.0574756	3.6927	0.000221885	0.00323086
C10G8.3	WBGene00015682	7.28283	4.89161	1.32527	3.69102	0.000223355	0.0032491
clec-173	WBGene00044469	237.456	-0.711385	0.192851	-3.68878	0.000225328	0.00327461
pnn-1	WBGene00011308	2176.73	0.162899	0.0441687	3.68811	0.000225923	0.0032792
fbxb-50	WBGene00019413	14.7661	-2.02227	0.548347	-3.68793	0.000226083	0.0032792
unc-42	WBGene00006778	26.7241	-2.07575	0.562995	-3.68698	0.000226929	0.00328452
dnpp-1	WBGene00017163	1943.09	0.216663	0.0587713	3.68654	0.000227321	0.00328452
hst-3.2	WBGene00044303	23.0879	-2.42302	0.657162	-3.6871	0.000226823	0.00328452
C10A4.10	WBGene00050957	45.3889	-0.970827	0.263344	-3.68653	0.000227331	0.00328452
F46E10.2	WBGene00018489	72.9584	-1.41466	0.383893	-3.68503	0.000228673	0.00330072
dmd-5	WBGene00017326	12.8618	-4.60919	1.25109	-3.68414	0.000229478	0.00330914
F56A11.5	WBGene00018925	1237.75	0.250269	0.0679366	3.68386	0.000229732	0.00330961
cct-4	WBGene00000379	7163.09	0.199648	0.0542549	3.67982	0.000233403	0.00335601
cchl-1	WBGene00011527	2949.37	0.176668	0.0480077	3.68	0.000233234	0.00335601
aars-2	WBGene00000197	7323.13	0.246407	0.0669731	3.6792	0.000233971	0.00336093
T14G10.5	WBGene00011775	4543.59	0.192867	0.0524308	3.67851	0.000234599	0.00336672
B0507.3	WBGene00015220	61.5933	-1.02019	0.277399	-3.6777	0.000235345	0.00337418
mes-1	WBGene00003219	592.739	0.296836	0.0807316	3.67683	0.000236154	0.00338254
toh-1	WBGene00006591	181.225	-0.526595	0.143232	-3.67651	0.000236447	0.00338348
tofu-6	WBGene00017132	2185.66	0.275131	0.0748404	3.67624	0.000236699	0.00338385
perm-5	WBGene00016955	2659.55	0.191349	0.0520809	3.67407	0.000238715	0.00340614
Y71G12B.13	WBGene00022153	1175.04	0.38733	0.105419	3.67419	0.000238604	0.00340614
scav-2	WBGene00013578	2049.62	0.233594	0.0635875	3.67359	0.00023917	0.00340938
bir-2	WBGene00000250	815.258	0.297829	0.0811502	3.6701	0.000242457	0.00344221
pat-3	WBGene00003930	4231.77	0.264438	0.0720497	3.67022	0.000242345	0.00344221
F59B8.1	WBGene00010316	9.58741	-3.58949	0.978084	-3.66992	0.000242627	0.00344221
sna-2	WBGene00011747	3036.97	0.251642	0.0685598	3.67041	0.000242164	0.00344221
mage-1	WBGene00018230	923.36	0.239482	0.0652466	3.67041	0.000242159	0.00344221
lect-2	WBGene00019407	123.679	-0.812998	0.221567	-3.66932	0.0002432	0.00344706
ssb-1	WBGene00016653	5632.37	0.187197	0.0510243	3.66878	0.000243714	0.00345107
sma-6	WBGene00004860	190.445	-0.512972	0.139851	-3.66799	0.000244464	0.00345841
F45H10.3	WBGene00009740	1599.09	0.249657	0.0680784	3.6672	0.000245222	0.00346585
prp-38	WBGene00008380	1542.73	0.255703	0.0697527	3.66586	0.000246511	0.00348078
R05D11.9	WBGene00011037	1974.78	0.414431	0.113074	3.66514	0.000247199	0.00348718
tcer-1	WBGene00022855	4851.1	0.33329	0.0909458	3.66471	0.000247616	0.00348977
mcm-3	WBGene00003155	7209.37	0.338743	0.0924497	3.66408	0.00024823	0.00349512
K04C2.3	WBGene00019381	1067.36	0.313438	0.0855753	3.66272	0.000249554	0.00350807
K06A5.1	WBGene00019429	2276.84	0.291906	0.0797032	3.66241	0.000249855	0.00350807
npp-24	WBGene00022672	1841.44	0.25425	0.0694206	3.66246	0.000249801	0.00350807
sol-1	WBGene00004944	16.1526	-1.67544	0.457562	-3.66167	0.000250577	0.0035116
ubc-1	WBGene00006701	1006.66	0.323976	0.0884719	3.6619	0.000250347	0.0035116
sds-22	WBGene00011637	1857.49	0.195276	0.0533346	3.66133	0.000250908	0.00351294
far-1	WBGene00001385	10379.7	0.342001	0.0934266	3.66064	0.000251584	0.00351567
rpl-21	WBGene00004433	24062.5	0.225977	0.0617324	3.6606	0.00025163	0.00351567
fbxb-2	WBGene00012065	13.7155	-2.83467	0.774418	-3.66039	0.000251833	0.00351567
Y116F11A.4	WBGene00014615	8.7983	-4.8268	1.31873	-3.66017	0.000252045	0.00351567
W09D10.4	WBGene00012362	1900.79	0.321403	0.0878211	3.65975	0.000252461	0.00351818
ugt-46	WBGene00015141	703.216	-0.494809	0.135265	-3.65808	0.000254111	0.00353788
F14B8.6	WBGene00017448	162.285	-0.556013	0.152067	-3.65637	0.000255813	0.00355825
rpl-25.2	WBGene00004439	13313.3	0.240639	0.065822	3.6559	0.000256281	0.00356145
F39F10.4	WBGene00018204	25.9601	-1.55766	0.4262	-3.65475	0.00025743	0.00357408
mma-1	WBGene00007587	3765.46	0.281357	0.0770124	3.6534	0.000258788	0.00358944
hpo-9	WBGene00015463	2615.42	0.179484	0.0491311	3.65318	0.000259017	0.00358944
rbr-2	WBGene00004319	3728.82	0.413011	0.113076	3.65251	0.000259688	0.0035954
gcn-1	WBGene00021697	4713.96	0.782753	0.214351	3.65173	0.000260478	0.003603
prx-6	WBGene00004195	128.179	-0.572651	0.156895	-3.6499	0.000262339	0.0036221
rps-10	WBGene00004479	16089.8	0.242022	0.0663092	3.6499	0.000262344	0.0036221
ubql-1	WBGene00008852	3576.17	0.162065	0.044419	3.64854	0.000263731	0.00363661
eri-9	WBGene00016143	1764.3	0.317654	0.0870668	3.6484	0.000263883	0.00363661
klu-1	WBGene00013970	30.3314	-1.40506	0.385324	-3.64643	0.000265908	0.00366114
fre-1	WBGene00001485	1248.13	0.248713	0.0682151	3.646	0.00026635	0.00366384
copa-1	WBGene00022119	6703.49	0.308242	0.0845901	3.64394	0.000268491	0.0036899
emc-5	WBGene00195248	919.679	0.301972	0.0829298	3.6413	0.000271267	0.00372462
F44F1.6	WBGene00009698	66.9639	-1.11648	0.306667	-3.64068	0.000271919	0.00373014
daf-36	WBGene00007536	247.145	-0.489033	0.134335	-3.6404	0.000272219	0.00373083
paxt-1	WBGene00011034	1113.28	0.226045	0.0621046	3.63975	0.000272908	0.00373341
mrpl-19	WBGene00022470	765.167	0.303646	0.0834244	3.63978	0.000272871	0.00373341
C40A11.6	WBGene00016549	15.1642	-3.43089	0.942729	-3.63932	0.00027336	0.00373618
pyp-1	WBGene00008149	3711.81	0.225352	0.0619311	3.63875	0.00027396	0.00374095
EEED8.2	WBGene00017133	110.633	-1.20924	0.332351	-3.63844	0.000274296	0.00374211
pbs-1	WBGene00003947	4259.82	0.234318	0.0644371	3.63638	0.000276498	0.00376491
rab-5	WBGene00004268	2987.28	0.236058	0.0649196	3.63615	0.000276743	0.00376491
spt-5	WBGene00005015	5521	0.3464	0.0952611	3.63632	0.000276556	0.00376491
sdz-29	WBGene00020081	32.8913	-1.72523	0.474494	-3.63593	0.000276976	0.00376491
nhr-97	WBGene00003687	1264.37	-0.290724	0.0799876	-3.63462	0.000278394	0.00378074
klp-16	WBGene00002226	2973.05	-0.253114	0.069674	-3.63283	0.000280328	0.00380354
cal-4	WBGene00000288	37.3512	-1.16287	0.320143	-3.63236	0.000280846	0.00380711
C25D7.10	WBGene00007720	705.859	0.349461	0.0962288	3.63156	0.000281713	0.0038154
ces-2	WBGene00000469	71.4184	-1.36317	0.375636	-3.62898	0.000284544	0.00384676
droe-4	WBGene00010262	88.9949	-0.860056	0.236985	-3.62916	0.000284343	0.00384676
C28H8.3	WBGene00016194	8913.97	0.34253	0.0944023	3.6284	0.000285178	0.00385184
Y53F4B.20	WBGene00013166	16.1803	-2.49004	0.686491	-3.6272	0.000286515	0.0038664
T22B2.2	WBGene00020666	22.6243	-2.25559	0.622394	-3.62405	0.000290024	0.00391021
htp-1	WBGene00002032	1445.37	-0.326864	0.0902259	-3.62273	0.000291507	0.00392667
C06C3.5	WBGene00007376	143.307	-1.15516	0.31898	-3.62142	0.000292992	0.00393917
T08G11.1	WBGene00011629	10883	0.513449	0.141789	3.62122	0.000293222	0.00393917
W08E12.7	WBGene00021088	16262.8	0.256256	0.0707653	3.62121	0.000293227	0.00393917
pde-3	WBGene00008443	224.881	0.646805	0.178638	3.62076	0.000293743	0.00394255
bcl-11	WBGene00017430	322.484	-0.635154	0.175492	-3.61928	0.000295422	0.00396152
xnd-1	WBGene00001514	4193.37	0.375604	0.103805	3.61835	0.000296489	0.00397226
B0238.9	WBGene00015073	2118.83	0.409048	0.113111	3.61633	0.000298812	0.0039998
gei-17	WBGene00001574	3545.45	0.275947	0.0763306	3.61516	0.000300164	0.00401313
B0205.9	WBGene00015023	1663.55	0.218369	0.0604063	3.615	0.000300346	0.00401313
his-55	WBGene00001929	30.2871	-8.20009	2.26871	-3.61442	0.000301019	0.00401659
wrt-10	WBGene00006956	137.935	-1.30376	0.360721	-3.61431	0.000301144	0.00401659
chk-1	WBGene00000498	1770.68	0.218205	0.0603895	3.61329	0.000302333	0.00402885
ceh-91	WBGene00013425	601.688	0.39979	0.110655	3.61293	0.000302753	0.00403086
F17C11.4	WBGene00008915	144.771	-0.519773	0.143981	-3.61	0.000306193	0.00406939
M01F1.8	WBGene00010814	826.063	0.275577	0.0763337	3.61016	0.000306003	0.00406939
ptr-20	WBGene00004234	130.983	-0.645573	0.178905	-3.60847	0.000308006	0.00408985
gba-1	WBGene00016335	243.592	-0.660089	0.182966	-3.60772	0.000308903	0.004098
Y54E10A.6	WBGene00021828	1803.84	0.501307	0.138963	3.60749	0.000309169	0.004098
dab-1	WBGene00000894	8198.36	0.375722	0.10418	3.60645	0.000310413	0.00410473
sel-10	WBGene00004767	3609.76	0.289012	0.0801438	3.60616	0.000310757	0.00410473
skr-21	WBGene00004827	61.5585	-1.24076	0.344068	-3.60615	0.000310777	0.00410473
Y39E4B.10	WBGene00012719	1072.85	0.311964	0.086496	3.60668	0.000310136	0.00410473
cox-18	WBGene00021932	350.755	0.304373	0.084451	3.60414	0.000313186	0.00413289
rps-30	WBGene00004499	11238.5	0.224467	0.0622866	3.60378	0.000313617	0.00413493
R04D3.3	WBGene00011011	2710.27	0.272397	0.075629	3.60175	0.000316079	0.0041637
hrpu-2	WBGene00022134	2928.96	0.266175	0.0739448	3.59964	0.000318657	0.00419396
M02B1.3	WBGene00010828	3189.31	0.378179	0.105084	3.59882	0.00031966	0.00420346
rack-1	WBGene00010556	37006	0.214928	0.0597272	3.5985	0.000320056	0.00420496
dct-10	WBGene00012618	45.5666	3.97872	1.10644	3.59595	0.000323204	0.00424258
pho-9	WBGene00022181	148.029	-0.70132	0.195078	-3.59507	0.000324299	0.00425321
T22B7.4	WBGene00020673	197.864	-0.656354	0.182613	-3.59424	0.00032534	0.00426313
acy-1	WBGene00000068	194.471	-0.774055	0.215428	-3.59311	0.000326758	0.00427795
rab-35	WBGene00004284	890.007	0.291861	0.0812761	3.59098	0.00032944	0.00430616
F15D3.6	WBGene00008856	1692.37	0.231478	0.0644618	3.59094	0.00032949	0.00430616
attf-2	WBGene00017317	6390.14	0.279646	0.077922	3.5888	0.000332208	0.00433788
qars-1	WBGene00001336	4944.96	0.261283	0.0728102	3.58855	0.000332525	0.00433824
deps-1	WBGene00022034	5095.02	0.391829	0.1092	3.58818	0.000332991	0.00434052
prmt-1	WBGene00013766	13938.1	0.179231	0.0499641	3.5872	0.000334252	0.00435315
ubc-9	WBGene00006706	4263.8	0.20585	0.0574236	3.58477	0.00033738	0.00439006
ZC317.1	WBGene00022587	25.8421	2.19537	0.612524	3.58414	0.000338193	0.00439681
oct-2	WBGene00003843	96.8024	-0.690217	0.192606	-3.58356	0.000338941	0.0044027
K04C2.2	WBGene00019380	3135.69	0.23793	0.0664095	3.58277	0.000339974	0.00441227
ucr-2.1	WBGene00012158	2014.28	0.273313	0.0763018	3.58201	0.000340964	0.00442128
nos-2	WBGene00003784	3224.69	0.315272	0.0880762	3.57954	0.000344199	0.00445935
hlh-14	WBGene00001958	30.1319	-1.68656	0.471405	-3.57774	0.000346581	0.00448631
F54E4.3	WBGene00010059	130.525	-0.632155	0.176703	-3.5775	0.000346899	0.00448654
pri-2	WBGene00004181	2531.18	0.382889	0.107082	3.57567	0.000349331	0.00450764
F57G9.3	WBGene00010219	13.0348	-2.09387	0.585532	-3.57601	0.000348873	0.00450764
arp-1	WBGene00013168	2101.08	0.221543	0.0619633	3.57539	0.0003497	0.00450764
nhr-201	WBGene00019741	22.9457	-1.38311	0.386843	-3.57537	0.000349738	0.00450764
nmy-2	WBGene00003777	19014.6	0.377279	0.105552	3.57433	0.000351131	0.0045185
C14E2.12	WBGene00219816	62.443	-0.913024	0.255443	-3.57428	0.000351187	0.0045185
cpf-2	WBGene00000774	1285.89	0.212722	0.0595313	3.57328	0.000352535	0.00453194
fbxb-93	WBGene00013408	15.9294	-2.48026	0.694568	-3.57094	0.000355699	0.00456869
ZK632.5	WBGene00014014	941.786	0.256141	0.0717495	3.56994	0.000357062	0.00458224
hmg-12	WBGene00001977	5984.66	0.311783	0.087389	3.56776	0.000360041	0.00461255
enpl-1	WBGene00011480	12041.1	0.189939	0.053235	3.56793	0.000359807	0.00461255
vab-23	WBGene00014153	54.5121	-1.23209	0.345568	-3.56541	0.000363281	0.00465006
drn-1	WBGene00016911	25.5807	-1.28849	0.361472	-3.56457	0.000364449	0.00466101
mrpl-30	WBGene00021021	523.596	0.274406	0.0770276	3.56244	0.000367429	0.0046951
M01F1.9	WBGene00010815	1936.85	0.240626	0.0675521	3.56209	0.000367916	0.0046973
ZK546.14	WBGene00022765	3705.28	0.193135	0.0542306	3.56137	0.000368927	0.00470619
Y17G7B.17	WBGene00012468	1037.2	0.281981	0.0791959	3.56055	0.000370076	0.00471681
T23B12.6	WBGene00020721	2012.26	0.363275	0.102052	3.55971	0.000371259	0.00472785
acs-4	WBGene00018152	10079.4	0.391676	0.110039	3.55944	0.000371642	0.00472869
C05C10.2	WBGene00007329	4516.04	0.366323	0.102931	3.55891	0.000372401	0.00473432
ctbp-1	WBGene00006424	76.5356	-1.06451	0.299239	-3.55738	0.000374569	0.00475782
eif-2gamma	WBGene00021466	5995.08	0.292445	0.0822584	3.5552	0.000377695	0.00479345
C34B7.2	WBGene00007912	1928.85	0.254807	0.0716805	3.55476	0.000378331	0.00479745
C17G10.7	WBGene00015919	20.4615	-1.61294	0.453781	-3.55446	0.00037876	0.00479881
kars-1	WBGene00002238	10739.5	0.193111	0.0543379	3.55389	0.00037958	0.00480296
C38D9.8	WBGene00008016	20.7658	-1.74202	0.490188	-3.55378	0.000379731	0.00480296
B0001.4	WBGene00007089	1472.01	0.192987	0.0543404	3.55144	0.000383133	0.00484187
tbx-38	WBGene00006557	12.3948	-2.04327	0.575516	-3.55032	0.000384761	0.00485423
fbxb-96	WBGene00016886	18.1465	-1.68462	0.474496	-3.55034	0.000384738	0.00485423
K03B4.1	WBGene00019353	1110.67	0.266116	0.0749708	3.5496	0.000385822	0.00486351
F57B7.2	WBGene00010192	64.4182	-0.977708	0.275585	-3.54775	0.000388538	0.00488948
C56G2.4	WBGene00016979	37.3642	-1.13518	0.319953	-3.54797	0.000388219	0.00488948
rab-28	WBGene00004281	8.62358	-3.29119	0.927842	-3.54715	0.000389421	0.00489647
mob-3	WBGene00020447	900.101	0.352794	0.09947	3.54673	0.000390038	0.00490009
fbxb-46	WBGene00019420	18.6397	-1.67961	0.47363	-3.54626	0.000390742	0.00490145
cogc-4	WBGene00021784	1958.68	0.415248	0.117096	3.54622	0.000390803	0.00490145
M110.3	WBGene00010913	785.106	0.238106	0.0671492	3.54592	0.00039125	0.00490295
dyci-1	WBGene00015927	2969.43	0.212947	0.0600623	3.54543	0.000391971	0.00490786
R07B7.6	WBGene00011090	88.217	-0.900637	0.254103	-3.54437	0.000393547	0.00492347
prx-10	WBGene00006946	881.417	0.262066	0.0739442	3.5441	0.000393958	0.00492415
Y48A5A.1	WBGene00021655	935.769	0.283424	0.0799753	3.5439	0.000394262	0.00492415
rpl-17	WBGene00004429	24594	0.198634	0.0560592	3.54329	0.000395171	0.00492726
T04H1.2	WBGene00011449	5145.9	0.189354	0.0534388	3.54338	0.000395028	0.00492726
pie-1	WBGene00004027	2204.73	0.427748	0.120741	3.54268	0.000396079	0.00493445
C06A5.6	WBGene00015504	3079.8	0.407854	0.115192	3.54065	0.000399145	0.00496851
M01E5.2	WBGene00010805	226.682	0.361437	0.102122	3.53927	0.000401238	0.0049904
Y57G11C.31	WBGene00013321	248.643	-0.499994	0.14131	-3.53827	0.000402753	0.00500507
ddx-15	WBGene00018967	3653.39	0.260113	0.0735285	3.53758	0.000403819	0.00501349
ipla-6	WBGene00022233	1355.77	0.299146	0.084567	3.53739	0.000404102	0.00501349
eif-3.C	WBGene00001226	8730.62	0.23986	0.0678347	3.53594	0.000406321	0.00503682
act-2	WBGene00000064	28517.8	0.271973	0.0769326	3.53521	0.000407451	0.00504664
ugt-25	WBGene00015692	163.051	-1.0756	0.304319	-3.53445	0.000408622	0.00505276
orc-3	WBGene00022488	1308.62	0.25667	0.0726161	3.53462	0.000408363	0.00505276
glr-4	WBGene00001615	61.8037	-0.935347	0.264981	-3.52986	0.000415776	0.00513511
F01D5.6	WBGene00008496	34.4539	-1.98405	0.562095	-3.52974	0.00041597	0.00513511
ppfr-1	WBGene00008878	4208.76	0.310302	0.0879178	3.52946	0.000416407	0.00513626
F08G2.5	WBGene00008577	662.323	1.83895	0.521267	3.52785	0.000418957	0.00516345
pros-1	WBGene00000448	86.2698	-0.980363	0.277942	-3.52722	0.000419943	0.00517133
Y53F4B.62	WBGene00219491	77.9113	-2.27619	0.645441	-3.52656	0.000420999	0.00518006
C35C5.10	WBGene00007959	226.745	-0.652122	0.184945	-3.52602	0.000421847	0.00518195
F08F3.4	WBGene00017262	829.056	-0.552726	0.156752	-3.52613	0.000421687	0.00518195
F59A3.2	WBGene00019075	1448.23	0.446767	0.126741	3.52503	0.000423432	0.00519714
lgc-31	WBGene00008997	22.7439	-1.43797	0.407957	-3.52481	0.000423794	0.00519731
Y54G11A.3	WBGene00013214	2161.15	0.27777	0.0788142	3.52437	0.000424489	0.00520155
K06G5.1	WBGene00010605	3107.51	-0.562435	0.159639	-3.52318	0.000426403	0.00521645
T13H5.1	WBGene00011755	194.362	-0.726244	0.206129	-3.52325	0.000426293	0.00521645
F54G2.1	WBGene00018837	212.647	-0.507324	0.144013	-3.52277	0.00042706	0.0052202
mtm-6	WBGene00003478	1741.32	0.35223	0.100017	3.52171	0.000428773	0.00523685
fbxb-48	WBGene00018444	20.8698	-1.5864	0.450729	-3.51963	0.000432148	0.00527377
lmd-3	WBGene00018700	6205.21	0.249905	0.0710115	3.51922	0.000432819	0.00527763
F19C7.8	WBGene00017597	34.3115	-1.20607	0.342785	-3.51846	0.000434059	0.00528843
B0393.3	WBGene00007168	4700.68	0.290397	0.0825487	3.51789	0.000434989	0.00529544
K11D9.3	WBGene00010772	163.027	-0.690915	0.196485	-3.51637	0.000437484	0.00531714
Y67D8C.9	WBGene00022073	93.7408	-0.799777	0.227434	-3.51653	0.000437227	0.00531714
wago-1	WBGene00011061	19605	0.280548	0.0797894	3.5161	0.000437938	0.00531832
hex-5	WBGene00013497	93.0664	-0.564276	0.160544	-3.51478	0.000440122	0.00534051
clec-218	WBGene00020938	192.781	-0.885947	0.252098	-3.5143	0.000440922	0.00534449
Y59E9AR.7	WBGene00022002	30.1303	-14.3614	4.08672	-3.51415	0.000441166	0.00534449
acn-1	WBGene00000039	287.686	-1.05443	0.300216	-3.51225	0.000444333	0.00537848
let-355	WBGene00020263	2353.54	0.301858	0.0859901	3.51039	0.000447458	0.00541192
flp-9	WBGene00001452	160.593	-0.66228	0.188712	-3.50948	0.000448984	0.00542598
C48B4.7	WBGene00008170	474.608	0.303194	0.0864178	3.50846	0.000450703	0.00544234
tbg-1	WBGene00006540	2085.28	0.172875	0.0492789	3.5081	0.000451316	0.00544534
ptb-1	WBGene00004207	179.48	-0.579745	0.165281	-3.50763	0.000452119	0.00545063
bath-34	WBGene00012195	145.17	0.522252	0.148937	3.50652	0.000454006	0.00546895
B0564.7	WBGene00007207	1264.25	0.332502	0.0948368	3.50605	0.000454812	0.00547424
chl-1	WBGene00010839	1399.02	0.281943	0.0804715	3.50363	0.000458954	0.00551965
T26E3.5	WBGene00012038	21.656	-1.44369	0.412135	-3.50297	0.000460108	0.00552907
rnr-1	WBGene00004391	10234.9	0.385452	0.110079	3.50158	0.000462512	0.00555349
clic-1	WBGene00020246	2634.97	0.211584	0.0604416	3.50063	0.000464152	0.0055687
F21G4.1	WBGene00009023	93.4162	-0.63831	0.18242	-3.49912	0.000466797	0.00559594
F59E12.1	WBGene00019118	3870.9	0.296429	0.0847443	3.49792	0.0004689	0.00561664
T09F3.5	WBGene00011664	842.555	0.308489	0.0882127	3.49711	0.000470335	0.00562931
dph-1	WBGene00007576	592.999	0.355215	0.101592	3.49649	0.00047143	0.0056379
F53C11.4	WBGene00009974	2106.78	0.311617	0.0891304	3.49619	0.000471956	0.00563966
tsr-1	WBGene00006647	915.99	0.525416	0.150304	3.49569	0.000472832	0.00564562
F47D12.9	WBGene00018564	2987.71	0.325701	0.0931908	3.49499	0.000474074	0.00565592
daf-6	WBGene00000902	27.7782	-1.77858	0.508965	-3.4945	0.000474958	0.00565743
#N/A	WBGene00306078	356.532	0.443049	0.126784	3.49451	0.000474926	0.00565743
Y37D8A.16	WBGene00012554	173.62	-0.717371	0.205316	-3.49398	0.000475872	0.00566379
lron-15	WBGene00016974	37.8468	-1.17833	0.33728	-3.49363	0.000476499	0.00566673
catp-8	WBGene00007514	3802.13	0.213955	0.0612665	3.4922	0.00047906	0.00569265
jmjd-3.2	WBGene00009089	92.5957	-1.32632	0.37991	-3.49115	0.000480953	0.0057106
dpf-5	WBGene00001058	4627.26	0.277145	0.0793965	3.49065	0.000481854	0.00571675
npp-6	WBGene00003792	4634.75	0.346381	0.099241	3.49031	0.000482466	0.00571946
haf-3	WBGene00001813	1854.29	0.226545	0.06492	3.4896	0.000483743	0.00572956
srpa-72	WBGene00017245	2662.43	0.564289	0.161715	3.48941	0.000484085	0.00572956
#N/A	WBGene00304992	35.3001	-1.14462	0.328112	-3.48851	0.000485723	0.00574438
sel-5	WBGene00004762	3346.1	0.366048	0.10497	3.48715	0.000488194	0.00576904
C06B3.6	WBGene00007365	568.172	-0.672315	0.192818	-3.48678	0.000488876	0.00577253
F10B5.2	WBGene00008639	824.747	0.208215	0.0597301	3.48592	0.000490441	0.00578423
faah-4	WBGene00013232	1147.68	0.2182	0.0625967	3.48581	0.000490642	0.00578423
such-1	WBGene00013443	1763.6	0.245763	0.0705111	3.48546	0.000491299	0.00578741
fut-1	WBGene00001505	125.343	-0.582987	0.167422	-3.48215	0.000497409	0.00585476
fmi-1	WBGene00001475	285.019	-1.09815	0.31545	-3.48123	0.000499122	0.00587029
rbf-1	WBGene00004316	70.1062	-0.851607	0.244716	-3.47998	0.000501454	0.00589307
Y49E10.18	WBGene00013037	229.952	-0.643027	0.184813	-3.47934	0.000502653	0.00590252
pbs-6	WBGene00003952	3029.92	0.262191	0.0753756	3.47846	0.000504303	0.00591286
Y37D8A.4	WBGene00012546	712.755	0.235097	0.0675868	3.47845	0.000504326	0.00591286
Y106G6H.9	WBGene00013721	21.1671	-2.20074	0.632796	-3.4778	0.000505541	0.00592245
pgp-6	WBGene00004000	246.762	-0.757218	0.217875	-3.47547	0.000509963	0.00596745
pxn-1	WBGene00004256	532.664	-0.460935	0.13263	-3.47535	0.000510182	0.00596745
meg-1	WBGene00010492	3487.47	0.382911	0.110207	3.47449	0.00051183	0.00598203
Y54F10AR.2	WBGene00021855	633.877	0.241969	0.0696613	3.4735	0.000513713	0.00599935
syd-1	WBGene00006363	57.824	-1.11987	0.322654	-3.4708	0.000518912	0.00603859
unc-26	WBGene00006763	1125.28	0.537635	0.154883	3.47124	0.000518058	0.00603859
dot-1.4	WBGene00010120	45.6332	-1.12086	0.32294	-3.47081	0.000518898	0.00603859
R11D1.1	WBGene00011242	1184.26	0.278389	0.0802161	3.47049	0.000519501	0.00603859
saeg-2	WBGene00011964	119.195	-0.606766	0.174831	-3.47058	0.000519338	0.00603859
obr-4	WBGene00016331	2921.27	0.277514	0.0799444	3.47134	0.000517873	0.00603859
T11B7.1	WBGene00011706	138.763	-0.958738	0.276415	-3.46847	0.000523429	0.00607951
#N/A	WBGene00305067	14.7471	-3.14045	0.905489	-3.46824	0.000523881	0.00608003
BE0003N10.1	WBGene00015266	735.727	0.444347	0.12813	3.46793	0.000524491	0.00608238
chs-1	WBGene00000496	12439.6	0.293899	0.0847729	3.4669	0.000526499	0.0060962
gmn-1	WBGene00013552	1917.47	0.301259	0.0868936	3.46699	0.000526327	0.0060962
ptr-6	WBGene00004221	63.0109	-1.06619	0.307614	-3.46602	0.000528226	0.00610672
arrd-4	WBGene00014159	49.7558	-1.25086	0.360875	-3.4662	0.00052788	0.00610672
clec-5	WBGene00016450	139.563	-0.750475	0.216588	-3.46499	0.000530254	0.00612542
T08D2.3	WBGene00011608	189.689	0.613903	0.17722	3.46407	0.000532067	0.00614161
H01G02.3	WBGene00010350	48.5017	-0.884047	0.255321	-3.46249	0.000535196	0.00617295
pdr-1	WBGene00003967	1387.55	0.219015	0.0632605	3.46211	0.000535958	0.00617697
C06E1.1	WBGene00015518	110.224	-0.668541	0.193175	-3.46081	0.000538562	0.00619795
Y54F10AM.8	WBGene00021852	984.352	-0.352552	0.101871	-3.46078	0.000538609	0.00619795
C17F4.12	WBGene00044374	9.90437	4.43459	1.28196	3.45923	0.000541723	0.00622898
fkh-2	WBGene00001434	22.1721	-1.9542	0.565007	-3.45872	0.000542742	0.0062322
mcm-4	WBGene00003156	5964.54	0.379158	0.109625	3.45868	0.000542838	0.0062322
exc-5	WBGene00001366	218.686	-0.52738	0.152513	-3.45793	0.000544348	0.00623514
F29A7.4	WBGene00017914	9.41159	-3.18497	0.921009	-3.45813	0.000543939	0.00623514
sut-2	WBGene00022019	3319.69	0.389962	0.112767	3.45813	0.000543938	0.00623514
rga-1	WBGene00012203	1396.05	0.380654	0.110175	3.45499	0.000550322	0.00629873
W03F9.4	WBGene00021002	116.096	-0.982429	0.284581	-3.45219	0.000556053	0.00635946
rpy-1	WBGene00004507	89.4405	-0.640008	0.185466	-3.45081	0.0005589	0.00638712
ghi-1	WBGene00013923	52.7448	-1.09961	0.318682	-3.4505	0.000559552	0.00638968
msh-2	WBGene00003418	3186.92	0.224275	0.0650249	3.44907	0.00056253	0.00641877
smg-7	WBGene00004885	631.8	0.256446	0.0744954	3.44245	0.000576476	0.00657288
Y48G10A.4	WBGene00013021	1393.44	0.522863	0.151932	3.44142	0.000578671	0.00659287
istr-1	WBGene00010736	2946.88	0.327985	0.0953368	3.44028	0.000581117	0.00661065
Y39A3CL.1	WBGene00021440	1708.16	0.230276	0.0669336	3.44036	0.000580945	0.00661065
egl-44	WBGene00001208	424.444	-0.549225	0.159663	-3.43991	0.000581912	0.0066134
ostf-4	WBGene00011557	7.96005	3.32925	0.967875	3.43975	0.000582245	0.0066134
lips-10	WBGene00008803	137.504	-0.62775	0.182548	-3.43883	0.000584239	0.006631
insc-1	WBGene00018392	92.6943	-0.779626	0.22681	-3.43735	0.000587426	0.00666211
orc-2	WBGene00003882	1326.23	0.194736	0.0566602	3.43691	0.000588387	0.00666794
usp-3	WBGene00013506	720.276	0.370932	0.107959	3.43585	0.000590693	0.00668397
ZC239.20	WBGene00044371	17.9061	-1.38683	0.403635	-3.43585	0.000590697	0.00668397
dnj-9	WBGene00001027	1634.94	0.266339	0.0775269	3.43544	0.000591589	0.00668899
nrde-1	WBGene00007577	1385.21	0.237324	0.0690981	3.43459	0.000593447	0.00670492
pif-1	WBGene00004028	1077.5	0.323672	0.0942474	3.43428	0.000594139	0.00670766
twk-2	WBGene00006657	50.4499	-0.992564	0.289117	-3.43309	0.000596745	0.00672691
stt-3	WBGene00020437	9187.56	0.400388	0.116622	3.43322	0.000596454	0.00672691
pos-1	WBGene00004078	15868.9	0.25524	0.0743533	3.4328	0.00059738	0.00672898
tbx-8	WBGene00006545	27.7173	-1.81349	0.528481	-3.4315	0.000600246	0.00675616
tram-1	WBGene00007696	2872.32	0.193664	0.0564455	3.43099	0.000601383	0.00676386
irx-1	WBGene00007984	159.193	-0.870711	0.253865	-3.42982	0.000603976	0.0067828
F59C6.8	WBGene00010327	12.0607	-1.96812	0.57382	-3.42986	0.000603897	0.0067828
npp-13	WBGene00003799	2823.16	0.288014	0.0840278	3.4276	0.000608938	0.00682825
C04B4.2	WBGene00007290	1746.23	0.257107	0.0750079	3.42773	0.000608644	0.00682825
fbxb-18	WBGene00019039	20.3122	-1.88089	0.549123	-3.42526	0.000614209	0.00688218
B0511.12	WBGene00015237	4671.68	0.510393	0.149019	3.42502	0.000614754	0.00688313
F58F12.1	WBGene00019061	3755.65	0.252175	0.0736481	3.42405	0.000616955	0.00690258
F11A10.5	WBGene00008686	2466.97	0.154933	0.0452541	3.42363	0.000617905	0.00690804
F43H9.3	WBGene00018399	503.742	0.252044	0.0736304	3.4231	0.000619114	0.00691637
F17C11.12	WBGene00008923	271.254	-0.599037	0.175118	-3.42076	0.000624454	0.00697081
lagr-1	WBGene00006505	17.1919	-1.57582	0.460945	-3.41867	0.000629272	0.00701537
Y71H2AM.2	WBGene00022167	1359.15	0.202731	0.059302	3.41862	0.000629386	0.00701537
cki-2	WBGene00000517	1224	0.183549	0.0536979	3.41818	0.000630404	0.00701624
ast-1	WBGene00020368	36.8659	-1.3683	0.400283	-3.41832	0.000630078	0.00701624
polq-1	WBGene00020964	1753.28	0.33591	0.098278	3.41795	0.000630937	0.00701695
cyk-7	WBGene00015591	2072.73	0.363191	0.106266	3.41775	0.000631418	0.00701706
cit-1.1	WBGene00000507	889.265	0.290628	0.0850761	3.41609	0.000635266	0.00705457
cpg-2	WBGene00015102	43139.6	0.325207	0.0952704	3.41351	0.00064131	0.00711639
egg-2	WBGene00019811	4878.14	0.327246	0.095875	3.41326	0.00064191	0.00711776
T01G1.2	WBGene00011337	48.8949	-0.819374	0.240249	-3.41052	0.000648392	0.0071843
C25E10.4	WBGene00016094	26.1679	-1.01288	0.29712	-3.40899	0.000652035	0.0072193
taf-7.2	WBGene00006389	856.951	0.229843	0.0674455	3.40784	0.000654786	0.00723092
acox-1.1	WBGene00008564	751.663	-0.340706	0.09998	-3.40774	0.000655022	0.00723092
F26E4.3	WBGene00009158	252.931	-0.415344	0.121868	-3.40815	0.000654048	0.00723092
nlf-1	WBGene00018854	75.4665	-0.892363	0.261834	-3.40813	0.000654107	0.00723092
C17C3.15	WBGene00015896	117.26	-0.956256	0.280677	-3.40696	0.000656903	0.00724632
K07C11.4	WBGene00019477	247.085	-0.674781	0.198072	-3.40674	0.000657428	0.00724676
H04D03.4	WBGene00010365	29.6811	-1.30832	0.384087	-3.40632	0.00065845	0.00725247
best-24	WBGene00022797	333.058	-0.369184	0.108388	-3.40613	0.000658918	0.00725247
perm-3	WBGene00022776	1258.88	0.250246	0.07348	3.40563	0.000660122	0.00726037
F53H1.1	WBGene00018776	3156.03	0.255459	0.0750306	3.40473	0.00066229	0.00727885
ppm-1.D	WBGene00021856	2301.89	0.433603	0.127376	3.40412	0.000663771	0.00728976
best-23	WBGene00014989	14.7628	-1.81951	0.534543	-3.40387	0.000664381	0.00729109
gdi-1	WBGene00001558	6991.44	0.173168	0.0508877	3.40294	0.000666647	0.00730522
ent-5	WBGene00017532	525.076	0.358998	0.105494	3.40303	0.000666423	0.00730522
gsp-1	WBGene00001747	3969.68	0.225421	0.0662489	3.40264	0.00066739	0.00730799
seb-3	WBGene00007664	25.6642	-1.40649	0.413482	-3.40157	0.00067	0.00732769
dut-1	WBGene00010609	6569.3	0.219466	0.0645203	3.4015	0.000670171	0.00732769
stam-1	WBGene00004109	2494.6	0.21738	0.0639235	3.40063	0.000672299	0.00734558
glp-1	WBGene00001609	6712.48	0.479537	0.141054	3.39967	0.000674674	0.00736614
T28D6.6	WBGene00012126	2095.71	0.212196	0.0624242	3.39926	0.000675694	0.00737188
pgp-4	WBGene00003998	167.898	-0.469783	0.13822	-3.39882	0.000676772	0.0073729
cdc-73	WBGene00018064	1652.62	0.326871	0.0961721	3.39882	0.000676776	0.0073729
rpt-2	WBGene00004502	6758.12	0.189909	0.0559176	3.39623	0.000683203	0.00740509
F13E9.11	WBGene00008760	210.927	-1.0685	0.314575	-3.39664	0.000682196	0.00740509
F25H2.6	WBGene00009120	2219.44	0.22215	0.0653926	3.39718	0.000680845	0.00740509
T19B10.8	WBGene00011835	3324.45	0.163291	0.0480748	3.3966	0.000682292	0.00740509
Y66D12A.9	WBGene00013435	1057.83	0.269583	0.0793638	3.3968	0.000681782	0.00740509
arrd-15	WBGene00014033	23.0173	-1.38356	0.407365	-3.39637	0.000682847	0.00740509
F37C12.1	WBGene00018149	1379.29	0.20983	0.0617647	3.39725	0.000680671	0.00740509
ilcr-1	WBGene00013415	113.964	-0.636417	0.187482	-3.39455	0.000687418	0.00744536
F44E2.4	WBGene00018418	157.757	-0.948896	0.279575	-3.39407	0.000688623	0.00745151
ribo-1	WBGene00020683	8821.96	0.101017	0.0297641	3.39393	0.000688984	0.00745151
mom-4	WBGene00003396	1548.3	0.252298	0.0743602	3.39291	0.000691532	0.00747365
dnj-16	WBGene00001034	1413.69	0.196429	0.0579019	3.39245	0.000692705	0.00748092
hil-7	WBGene00001858	270.426	-1.43832	0.424159	-3.39098	0.000696431	0.00751557
nsf-1	WBGene00003818	2650.37	0.357444	0.105416	3.39079	0.000696921	0.00751557
Y71H2AM.9	WBGene00022174	1376.45	0.333186	0.0982688	3.39055	0.000697518	0.00751657
chtl-1	WBGene00018037	1227.25	0.348311	0.102754	3.38974	0.000699592	0.00753348
cyp-32A1	WBGene00016147	80.4174	-0.803453	0.237061	-3.38922	0.000700919	0.00754234
clr-1	WBGene00000548	3849.8	0.451962	0.133381	3.3885	0.000702762	0.00755421
F10D11.2	WBGene00008648	1505.09	0.244717	0.0722325	3.3879	0.000704302	0.00755421
snpn-1	WBGene00015327	853.18	0.259638	0.076629	3.38825	0.000703397	0.00755421
F22F4.5	WBGene00017718	56.3023	-0.970714	0.286532	-3.3878	0.000704553	0.00755421
eif-2alpha	WBGene00021351	5945.71	0.214337	0.0632625	3.38805	0.000703916	0.00755421
xpo-1	WBGene00002078	11035.2	0.312497	0.0922661	3.38691	0.000706841	0.0075733
casy-1	WBGene00000403	803.555	-0.495083	0.14623	-3.38565	0.000710087	0.00760133
rgs-4	WBGene00004347	100.681	-0.861805	0.254577	-3.38524	0.000711166	0.00760133
glo-3	WBGene00010341	61.7491	-0.746026	0.220384	-3.38511	0.000711494	0.00760133
T25E12.6	WBGene00012021	135.581	-0.71292	0.210584	-3.38544	0.000710646	0.00760133
prx-3	WBGene00004193	179.685	-0.624823	0.184604	-3.38467	0.000712633	0.00760804
nuo-1	WBGene00003831	6335.87	0.186074	0.0549883	3.38389	0.000714668	0.00761888
F35E2.8	WBGene00009415	7.80586	-4.2694	1.26167	-3.38393	0.000714565	0.00761888
F36A2.9	WBGene00009456	2415.35	0.37406	0.110559	3.38334	0.000716092	0.0076286
mtx-1	WBGene00009559	1937.06	0.289842	0.0856842	3.38268	0.000717824	0.0076416
trcs-2	WBGene00011312	4393.92	0.498598	0.147412	3.38235	0.000718684	0.0076453
ceh-92	WBGene00013431	1188.03	0.33996	0.100526	3.38182	0.000720084	0.00765474
nlp-53	WBGene00012440	32.278	-1.1681	0.345455	-3.38134	0.00072134	0.00766263
F44E2.8	WBGene00018421	2915.22	0.173511	0.0513208	3.3809	0.00072248	0.00766928
col-80	WBGene00000656	22037.7	0.394922	0.116821	3.38057	0.000723351	0.00767308
sng-1	WBGene00004912	27.5425	-1.12503	0.332937	-3.37912	0.000727191	0.00770833
Y71A12B.3	WBGene00013501	16.2916	-18.1137	5.36238	-3.37792	0.000730351	0.00773633
tbb-4	WBGene00006538	64.5613	-1.33084	0.394043	-3.37741	0.000731725	0.00774539
eak-7	WBGene00010671	2068.77	0.207602	0.0614886	3.37626	0.000734777	0.00777218
unc-61	WBGene00006795	2836.13	0.227174	0.0673008	3.37551	0.000736803	0.00778809
atp-2	WBGene00000229	43163.2	0.284778	0.0843767	3.37508	0.000737937	0.00778905
grld-1	WBGene00017929	1865.31	0.210281	0.0623026	3.37517	0.000737711	0.00778905
swip-10	WBGene00018738	23.0886	-1.54426	0.457767	-3.37346	0.000742304	0.0078296
sta-1	WBGene00013111	140.249	-0.514188	0.152517	-3.37136	0.00074798	0.0078839
ucr-2.3	WBGene00020757	2899.94	0.251011	0.0744656	3.37083	0.000749423	0.00789354
rad-23	WBGene00013924	5192.43	0.12544	0.0372215	3.37011	0.000751392	0.00790869
C13B7.6	WBGene00015731	456.003	0.307436	0.0912408	3.3695	0.000753043	0.00791766
R02F11.4	WBGene00019842	1617.83	0.207909	0.061705	3.36941	0.000753305	0.00791766
K07C11.7	WBGene00019479	599.473	-0.457404	0.135786	-3.36857	0.000755589	0.0079305
sulp-6	WBGene00020914	25.1717	2.42223	0.719041	3.36869	0.000755263	0.0079305
set-3	WBGene00007403	1218.34	0.173963	0.0516477	3.36826	0.000756448	0.00793393
dbl-1	WBGene00000936	76.088	-0.740646	0.219933	-3.3676	0.000758256	0.00794044
gpc-1	WBGene00001681	8.59579	-2.48624	0.738298	-3.36754	0.000758428	0.00794044
gcp-2.1	WBGene00020082	1173.97	-0.381748	0.113364	-3.36745	0.000758665	0.00794044
Y57G11C.9	WBGene00013307	4217.18	0.289994	0.0861479	3.36624	0.000762007	0.00796426
B0222.1	WBGene00015053	6.81098	-2.70303	0.802964	-3.36632	0.000761782	0.00796426
Y54G11A.1	WBGene00013212	1042.07	0.326504	0.0970211	3.36529	0.000764646	0.00798624
unc-57	WBGene00006791	2626.41	0.275313	0.0818158	3.36504	0.000765339	0.00798789
meg-4	WBGene00016485	988.406	0.325098	0.096623	3.3646	0.000766549	0.00799493
raga-1	WBGene00006414	1685.17	0.157728	0.0468914	3.36368	0.000769112	0.00800964
aff-1	WBGene00016625	20.6319	-1.72501	0.512858	-3.36351	0.000769569	0.00800964
rpc-2	WBGene00017300	5715.56	0.259814	0.0772422	3.36363	0.000769255	0.00800964
F26G1.1	WBGene00017837	2186.73	0.246641	0.0733374	3.3631	0.000770716	0.0080158
acp-6	WBGene00022245	7063.89	-0.765371	0.227591	-3.36292	0.000771236	0.0080158
Y69A2AR.16	WBGene00022087	2097.65	0.333776	0.0993157	3.36076	0.000777286	0.00807306
mex-6	WBGene00003231	9456.2	0.305766	0.0909973	3.36017	0.000778949	0.0080791
F30F8.1	WBGene00009270	2872.09	0.304978	0.0907587	3.36031	0.000778543	0.0080791
ZK899.5	WBGene00014143	27.137	-1.31153	0.390341	-3.35995	0.00077956	0.00807981
inx-5	WBGene00002127	325.47	-0.467209	0.139097	-3.35888	0.000782591	0.00809476
snf-6	WBGene00004905	1360.01	0.453423	0.135016	3.35829	0.000784256	0.00809476
C05D12.5	WBGene00007342	32.9848	-1.25745	0.37435	-3.35901	0.000782214	0.00809476
fbxa-103	WBGene00008612	8.19839	-4.26421	1.26966	-3.35855	0.000783512	0.00809476
F31C3.6	WBGene00009288	88.0188	-0.628806	0.187229	-3.35848	0.000783729	0.00809476
EEED8.4	WBGene00017135	110.946	-0.9336	0.27797	-3.35864	0.000783276	0.00809476
sart-3	WBGene00007111	3960.22	0.199259	0.0593434	3.35773	0.00078584	0.0081055
inx-22	WBGene00002144	2218.77	0.278358	0.082924	3.35679	0.000788543	0.00812777
rpl-5	WBGene00004416	32660.4	0.328011	0.0977701	3.35492	0.000793888	0.00817502
zig-10	WBGene00020800	22.5675	-2.03608	0.606914	-3.3548	0.000794223	0.00817502
bbs-2	WBGene00000242	13.2048	-3.1689	0.94474	-3.35426	0.000795773	0.00817969
fbxb-82	WBGene00020542	22.4683	-1.57974	0.470955	-3.35433	0.000795571	0.00817969
vamp-7	WBGene00022077	367.761	0.359997	0.107343	3.3537	0.000797398	0.00819075
sur-6	WBGene00006352	4857.04	0.170953	0.0510326	3.34989	0.000808444	0.0082985
pdk-1	WBGene00003965	552.477	0.486548	0.145317	3.34818	0.000813455	0.0083403
tat-1	WBGene00013034	3056.33	0.370271	0.110591	3.34811	0.000813633	0.0083403
Y77E11A.23	WBGene00235267	19.8555	-1.79962	0.537607	-3.34746	0.000815568	0.00835439
EEED8.15	WBGene00017143	284.671	-0.613318	0.183237	-3.34713	0.000816535	0.00835857
C02B10.4	WBGene00015329	2240.53	0.207107	0.0618983	3.34592	0.000820113	0.00838944
R07B7.2	WBGene00011087	1732.61	0.319214	0.0954141	3.34557	0.00082115	0.00839429
tre-4	WBGene00006610	88.8534	-0.795636	0.237857	-3.34501	0.00082279	0.0084053
ifc-1	WBGene00002055	262.105	-0.439271	0.131345	-3.34441	0.000824568	0.0084177
D1053.4	WBGene00008369	27.4506	-1.1139	0.333162	-3.34343	0.000827498	0.00844183
tbc-17	WBGene00012894	1489.05	0.389522	0.116569	3.34156	0.0008331	0.00849318
T24H10.4	WBGene00012002	1138.28	0.299332	0.0895841	3.34135	0.000833721	0.00849371
npp-21	WBGene00019940	9557.32	0.471175	0.141039	3.34073	0.00083557	0.00850674
ech-4	WBGene00001153	1751.89	0.213831	0.0640121	3.34048	0.000836338	0.00850876
pkc-3	WBGene00004034	2223.2	0.197481	0.0591543	3.3384	0.000842618	0.00856098
fbxa-215	WBGene00012879	4316.42	0.215818	0.0646467	3.33843	0.000842547	0.00856098
rpn-10	WBGene00004466	2811.38	0.171746	0.0514589	3.33755	0.000845219	0.00858156
tftc-1	WBGene00021423	1719.92	0.642674	0.19258	3.33717	0.00084635	0.0085872
Y73B6BL.23	WBGene00022244	1689.13	0.266064	0.0797675	3.33549	0.000851501	0.0086336
amx-2	WBGene00000138	173.718	-0.487086	0.146125	-3.33336	0.000858039	0.00869398
nhr-241	WBGene00013483	18.7631	4.38293	1.3151	3.33277	0.00085987	0.00870663
ugt-65	WBGene00008583	77.4186	-0.647442	0.194295	-3.33226	0.000861442	0.00871662
ttr-32	WBGene00020047	93.5026	-0.740063	0.222106	-3.33203	0.000862158	0.00871796
mrps-5	WBGene00008452	1877.85	0.205975	0.0618343	3.33107	0.000865129	0.00874208
ZC168.2	WBGene00013856	11.7396	-2.51818	0.756264	-3.32976	0.000869215	0.00877149
F09F9.4	WBGene00017309	29.1886	-1.73248	0.520287	-3.32984	0.000868945	0.00877149
iars-2	WBGene00002153	2243.43	0.229709	0.0690089	3.32869	0.000872547	0.00879917
tag-72	WBGene00006447	961.7	0.19259	0.0579304	3.3245	0.000885777	0.00892655
seld-1	WBGene00012867	307.685	0.346585	0.104263	3.32413	0.000886957	0.00893241
rpl-2	WBGene00004413	49391.2	0.256338	0.0771216	3.32381	0.000887951	0.00893639
rpl-4	WBGene00004415	46298.2	0.331365	0.0997422	3.32221	0.000893063	0.00898178
fkh-5	WBGene00001437	21.0541	-1.36616	0.411592	-3.3192	0.000902745	0.00907129
C01B4.7	WBGene00015271	79.9267	8.81935	2.65718	3.31907	0.000903178	0.00907129
sax-2	WBGene00004728	4188.67	0.398255	0.120002	3.31872	0.00090431	0.00907592
plrg-1	WBGene00006481	2885.96	0.207336	0.0624778	3.31855	0.000904856	0.00907592
chaf-2	WBGene00022141	2362.77	0.262974	0.0792786	3.31709	0.000909596	0.00911734
dyf-5	WBGene00001121	15.2679	-2.09349	0.631182	-3.31677	0.000910637	0.00912165
gst-1	WBGene00001749	2755.4	0.275284	0.0830031	3.31656	0.000911337	0.00912254
nuc-1	WBGene00003828	1176.78	-0.514793	0.15527	-3.31548	0.000914857	0.00915163
dgtr-1	WBGene00020910	957.604	0.298538	0.0901258	3.31246	0.000924793	0.00924483
taf-4	WBGene00006385	1230.14	0.216432	0.0653656	3.3111	0.000929288	0.00928355
Y92H12BL.5	WBGene00022366	483.574	0.500798	0.151287	3.31026	0.000932091	0.00930533
F32D1.5	WBGene00017984	7702.29	0.160943	0.048627	3.30974	0.000933816	0.00931632
npr-29	WBGene00013848	11.1557	-2.38515	0.720853	-3.30879	0.000936992	0.00934175
ensa-1	WBGene00010730	2944.32	0.317914	0.0960933	3.30839	0.000938353	0.00934765
Y105C5A.14	WBGene00013638	132.464	-0.645732	0.195189	-3.30824	0.000938836	0.00934765
rnr-2	WBGene00004392	12038.8	0.188505	0.056984	3.30803	0.000939533	0.00934835
B0491.6	WBGene00007193	999.77	0.268546	0.0811861	3.30778	0.000940383	0.00935058
F49B2.7	WBGene00086555	10.8507	-3.17542	0.960044	-3.30758	0.000941069	0.00935117
unc-9	WBGene00006749	87.2166	-0.65084	0.196828	-3.30665	0.000944187	0.0093759
C34C12.8	WBGene00007927	1451.13	0.2249	0.0680216	3.3063	0.000945356	0.00938127
fbxb-33	WBGene00044314	12.0654	-2.36913	0.716632	-3.30592	0.000946666	0.00938803
lgc-46	WBGene00022106	13.7165	-2.22402	0.672779	-3.30573	0.000947301	0.0093881
ttm-5	WBGene00013197	151.809	-0.718321	0.217429	-3.3037	0.000954186	0.00945005
C13B4.1	WBGene00007545	1885.86	0.302786	0.0916588	3.3034	0.000955184	0.00945366
C04F12.1	WBGene00007297	1924.94	0.332858	0.100783	3.30273	0.000957469	0.00947
hmt-1	WBGene00001815	1840.01	0.211619	0.0640846	3.30218	0.000959373	0.00948254
ptc-1	WBGene00004208	16590.9	0.380137	0.115139	3.30155	0.000961525	0.00949752
let-858	WBGene00002957	3543.32	0.443608	0.134376	3.30124	0.000962568	0.00950154
npp-3	WBGene00003789	5645.55	0.437174	0.132452	3.30062	0.000964708	0.00951637
rpn-2	WBGene00004459	9692.34	0.368974	0.111806	3.30012	0.000966423	0.00952699
algn-8	WBGene00007464	791.107	0.213324	0.0646523	3.29956	0.000968377	0.00953996
C05G5.5	WBGene00007351	17.5811	-2.12655	0.644592	-3.29906	0.000970101	0.00954434
fbxb-11	WBGene00018436	18.3529	-1.82354	0.552725	-3.29918	0.000969671	0.00954434
F37A4.1	WBGene00018131	2751.12	0.179506	0.054419	3.29858	0.000971745	0.00955421
kcnl-4	WBGene00008265	29.8194	-1.36108	0.412671	-3.29822	0.000973007	0.00956033
cutl-2	WBGene00013145	42.1134	-1.87455	0.568747	-3.29593	0.000980955	0.00963208
F31F6.1	WBGene00009300	209.663	0.441039	0.13383	3.29552	0.000982386	0.00963978
Y94H6A.5	WBGene00022378	1055.42	0.471239	0.143022	3.29487	0.000984659	0.00965574
erm-1	WBGene00001333	6134.48	0.215958	0.0655672	3.29369	0.000988816	0.00967109
vps-35	WBGene00006933	3417.7	0.201442	0.0611582	3.29379	0.000988458	0.00967109
Y55D9A.2	WBGene00013224	1262.61	0.246856	0.0749474	3.29373	0.00098869	0.00967109
linc-168	WBGene00219625	30.7299	-4.22056	1.28129	-3.29398	0.000987784	0.00967109
gcs-1	WBGene00001527	2310.32	0.164261	0.0498873	3.29265	0.000992494	0.0097007
F35H8.2	WBGene00009447	55.8477	-0.915396	0.278079	-3.29186	0.00099527	0.00972147
picc-1	WBGene00017931	2854.08	0.308313	0.0936857	3.29093	0.000998571	0.00974733
rpb-6	WBGene00007355	933.547	0.235111	0.0714482	3.29065	0.000999563	0.00975064
eya-1	WBGene00001377	100.452	-0.941029	0.286086	-3.28932	0.00100429	0.00979035
hars-1	WBGene00002001	2784.46	0.198084	0.0602332	3.28862	0.0010068	0.00979566
Y39G8B.2	WBGene00012723	171.635	0.484749	0.147387	3.28894	0.00100564	0.00979566
mppb-1	WBGene00013880	1235.94	0.219674	0.0667975	3.28866	0.00100664	0.00979566
rskn-1	WBGene00011352	6288.81	0.337391	0.102608	3.28815	0.00100847	0.00980548
slt-1	WBGene00004854	132.548	-0.918026	0.279317	-3.28669	0.00101373	0.00983535
clec-54	WBGene00008596	75.3663	-0.688411	0.209474	-3.28638	0.00101484	0.00983535
F21A3.3	WBGene00008993	125.971	-0.580634	0.176676	-3.28643	0.00101466	0.00983535
tag-321	WBGene00044325	751.805	0.241251	0.0734055	3.28655	0.00101422	0.00983535
Y51H7C.41	WBGene00302984	142.223	0.686011	0.208733	3.28655	0.00101422	0.00983535
ets-7	WBGene00017601	29.0146	-1.47565	0.449089	-3.28587	0.00101666	0.00984175
hipr-1	WBGene00022717	2912.8	0.252575	0.0768679	3.28583	0.00101682	0.00984175
K10G6.4	WBGene00019641	9.36603	-4.33341	1.319	-3.28538	0.00101846	0.00985132
clik-1	WBGene00020808	13407.6	0.366764	0.111648	3.285	0.00101982	0.009858
kbrl-1	WBGene00009919	1264.92	0.196131	0.0597342	3.2834	0.00102562	0.0099077
epg-3	WBGene00012559	2060.54	0.39318	0.1198	3.28197	0.00103084	0.00994045
C27F2.10	WBGene00016171	1610.68	0.198476	0.0604713	3.28216	0.00103015	0.00994045
F26G5.1	WBGene00017843	1039.9	0.363152	0.110652	3.28193	0.00103101	0.00994045
osta-3	WBGene00012182	952.091	0.433841	0.132225	3.28109	0.00103409	0.00996367
rrn-3.1	WBGene00004622	880529	-1.25697	0.383253	-3.27973	0.00103908	0.0100031
cdk-2	WBGene00019362	981.013	0.274917	0.0838263	3.27961	0.00103952	0.0100031
snrp-40.2	WBGene00015974	678.128	0.21494	0.0655439	3.27934	0.00104052	0.0100063
parn-2	WBGene00013265	847.852	0.328046	0.100049	3.27886	0.00104227	0.0100166
nhr-49	WBGene00003639	2076.71	0.16501	0.0503301	3.27855	0.00104344	0.0100214
fkb-4	WBGene00001429	26.7299	-1.3168	0.401744	-3.2777	0.00104655	0.0100384
ant-1.1	WBGene00006439	58160.3	0.174171	0.0531356	3.27786	0.00104596	0.0100384
R03G5.6	WBGene00019847	125.293	-0.514437	0.157036	-3.27591	0.00105323	0.0100959
eif-2Bbeta	WBGene00012950	866.86	0.236539	0.0722244	3.27506	0.00105641	0.01012
F53F8.5	WBGene00010002	1930.19	0.284769	0.0869949	3.27339	0.00106264	0.010173
spt-16	WBGene00018849	8890.56	0.311524	0.0951738	3.27322	0.00106331	0.010173
drap-1	WBGene00009584	2521.56	0.245644	0.0750578	3.27273	0.00106514	0.010184
Y55F3AR.2	WBGene00021933	908.207	0.34035	0.10401	3.27228	0.00106686	0.0101939
K10C3.4	WBGene00010731	2979.77	0.267489	0.0817904	3.27042	0.00107389	0.0102479
T26C12.3	WBGene00020833	38.3314	-1.42023	0.434259	-3.27047	0.00107367	0.0102479
imp-2	WBGene00011481	4275.83	0.189153	0.0578601	3.26914	0.00107875	0.0102877
ZK973.9	WBGene00022835	1115.21	0.343489	0.105084	3.26872	0.00108036	0.0102966
ivd-1	WBGene00015326	3380.75	0.132479	0.0405341	3.26833	0.00108184	0.0103041
Y54E2A.8	WBGene00013193	939.209	0.272343	0.0833351	3.26805	0.00108291	0.0103077
F09C3.2	WBGene00008610	46.9111	-0.970877	0.297216	-3.26657	0.00108859	0.0103551
D2005.1	WBGene00008397	85.4145	-1.2895	0.394802	-3.26619	0.00109006	0.0103625
imph-1	WBGene00010908	5387.21	0.49743	0.152346	3.26513	0.00109414	0.0103947
ech-1.2	WBGene00020347	6576.17	0.165326	0.0506378	3.26487	0.00109516	0.0103977
uaf-1	WBGene00006697	3270.99	0.329446	0.100941	3.26374	0.00109953	0.0104326
dnj-7	WBGene00001025	890.008	-0.276423	0.084704	-3.26339	0.00110086	0.0104374
rpn-11	WBGene00004467	4635.41	0.187339	0.0574087	3.26325	0.00110144	0.0104374
rrn-1.2	WBGene00004513	196030	-1.1598	0.355446	-3.26295	0.00110258	0.0104416
fbxc-2	WBGene00016648	44.1393	23.3761	7.16453	3.26275	0.00110337	0.0104424
lap-2	WBGene00002250	6875.93	0.26308	0.0806502	3.26199	0.00110634	0.0104639
eif-2Bepsilon	WBGene00008428	1323.71	0.335979	0.103015	3.26147	0.00110837	0.0104765
cyp-35A4	WBGene00016786	12.9454	-1.83402	0.562536	-3.26027	0.00111305	0.0105141
F26A3.4	WBGene00009142	318.339	-0.456387	0.139997	-3.25999	0.00111416	0.010518
hhat-1	WBGene00013852	49.7041	-1.41046	0.432694	-3.25971	0.00111525	0.0105215
let-765	WBGene00002889	5799.83	0.627426	0.1925	3.25935	0.00111667	0.0105283
H25P19.1	WBGene00019244	678.898	0.346239	0.106277	3.25788	0.00112248	0.0105764
Y74C9A.9	WBGene00235381	22.4452	1.01498	0.311659	3.2567	0.00112715	0.0106137
mrpl-34	WBGene00007712	826.876	0.318886	0.0979352	3.25609	0.00112957	0.0106298
unc-108	WBGene00006833	2666.4	0.169188	0.0519717	3.25538	0.00113242	0.0106365
R74.2	WBGene00011278	39.9664	-0.997461	0.306377	-3.25566	0.00113129	0.0106365
C46F2.1	WBGene00016714	86.7656	-0.774907	0.238026	-3.25555	0.00113172	0.0106365
F53A2.1	WBGene00009949	17.2052	-1.82908	0.562002	-3.25457	0.00113563	0.010656
teg-4	WBGene00019323	3498.94	0.26238	0.0806207	3.2545	0.00113593	0.010656
rpl-28	WBGene00004442	9610.68	0.219075	0.0673195	3.25426	0.00113688	0.010658
hda-6	WBGene00018319	3782.91	0.252389	0.0775605	3.25409	0.00113756	0.010658
ule-3	WBGene00008378	13534.8	0.318421	0.0978908	3.25281	0.00114268	0.0106992
rab-3	WBGene00004267	93.2512	-0.63435	0.195112	-3.25121	0.00114916	0.0107464
ugt-29	WBGene00021709	392.36	-0.616317	0.18956	-3.25131	0.00114875	0.0107464
ncap-1	WBGene00022453	536.761	0.264248	0.0812945	3.2505	0.00115203	0.0107664
oxi-1	WBGene00003898	1680.27	0.227094	0.0698739	3.25006	0.00115381	0.0107763
kin-3	WBGene00002191	5127.53	0.156779	0.048243	3.24978	0.00115495	0.0107802
evl-18	WBGene00009372	2354.91	0.232984	0.0717107	3.24894	0.00115837	0.0108054
mes-3	WBGene00003221	2130.2	0.267481	0.082349	3.24813	0.00116165	0.0108293
C49C3.9	WBGene00008199	265.138	-0.620156	0.191037	-3.24626	0.0011693	0.0108878
igcm-4	WBGene00022418	159.466	-0.8621	0.265569	-3.24624	0.00116939	0.0108878
D2096.11	WBGene00017078	592.912	0.347337	0.107041	3.24489	0.00117497	0.0109329
maco-1	WBGene00017066	3856.4	0.249871	0.0770373	3.24351	0.00118066	0.010979
W07G4.3	WBGene00012337	3496.82	0.504379	0.155515	3.24328	0.00118163	0.0109812
hsp-1	WBGene00002005	72635.3	0.432284	0.133294	3.24308	0.00118246	0.0109821
sel-11	WBGene00004768	3192.75	0.296157	0.0913261	3.24286	0.00118338	0.0109838
AH9.6	WBGene00044701	11.095	-1.70984	0.527314	-3.24256	0.00118462	0.0109885
nifk-1	WBGene00011408	2498.34	0.189875	0.0585621	3.24227	0.0011858	0.0109916
F21A9.2	WBGene00017651	40.5107	-1.09093	0.336526	-3.24173	0.00118805	0.0109916
panl-2	WBGene00017951	2606.21	0.359503	0.110903	3.24159	0.00118864	0.0109916
ZC196.5	WBGene00022549	66.1676	-0.792572	0.244491	-3.24172	0.00118811	0.0109916
fbxb-66	WBGene00044066	37.1533	-1.77346	0.547067	-3.24177	0.00118791	0.0109916
ctc-3	WBGene00010962	15789.5	0.650262	0.200688	3.24016	0.00119461	0.01104
C17E7.4	WBGene00015899	991.387	0.312968	0.0966125	3.23942	0.00119774	0.0110621
dsb-1	WBGene00008580	1128.46	0.302098	0.0932766	3.23873	0.00120063	0.0110819
nyn-2	WBGene00013596	1367.42	0.32761	0.101213	3.23684	0.00120862	0.0111487
msh-5	WBGene00003421	1408.04	0.279141	0.0862513	3.23637	0.00121059	0.0111548
K03A11.1	WBGene00010519	161.835	-0.571411	0.176567	-3.23622	0.00121123	0.0111548
chch-3	WBGene00010942	1302.61	0.310052	0.0958089	3.23615	0.00121152	0.0111548
F37H8.5	WBGene00009514	1479	0.333379	0.103065	3.23464	0.00121797	0.0112073
denn-4	WBGene00018681	2068.42	0.533006	0.164793	3.23439	0.00121903	0.0112101
cdh-9	WBGene00000401	54.5989	-1.3159	0.406898	-3.23399	0.00122076	0.0112191
hrdl-1	WBGene00009164	3064.64	0.185617	0.0573996	3.23377	0.00122168	0.0112207
unc-4	WBGene00006744	6.1689	-4.2617	1.31935	-3.23015	0.00123727	0.0113569
olrn-1	WBGene00007260	99.5416	-0.748545	0.231813	-3.22909	0.00124184	0.0113638
C34C12.6	WBGene00007925	80.5034	-0.878273	0.271987	-3.2291	0.00124181	0.0113638
F28H7.3	WBGene00009237	1226.38	-0.591467	0.183159	-3.22926	0.00124109	0.0113638
T27F6.7	WBGene00012106	508.686	0.311908	0.0965793	3.22955	0.00123983	0.0113638
R07E4.5	WBGene00019938	633.039	0.334985	0.103739	3.22912	0.0012417	0.0113638
F55B11.3	WBGene00010085	2180.87	0.31869	0.0987143	3.2284	0.00124483	0.0113823
zipt-15	WBGene00021936	1628	0.26098	0.0808418	3.22828	0.00124538	0.0113823
inx-14	WBGene00002136	2812.74	0.232309	0.0719755	3.22761	0.00124828	0.0114018
C35E7.2	WBGene00016454	46.7245	-0.83857	0.259848	-3.22715	0.00125029	0.0114132
F33H2.2	WBGene00009366	2998.29	0.277284	0.085931	3.22682	0.00125175	0.0114195
cdk-9	WBGene00000410	945.081	0.314396	0.0974619	3.22583	0.00125607	0.011452
rde-10	WBGene00021634	1123.9	0.339361	0.105209	3.22559	0.00125715	0.0114548
Y39B6A.43	WBGene00012701	707.266	0.32441	0.100597	3.22486	0.00126034	0.0114769
gbb-1	WBGene00021528	83.0087	-1.14989	0.35673	-3.2234	0.00126677	0.0115284
sars-2	WBGene00005662	1078.39	0.248927	0.0772448	3.22258	0.00127042	0.0115545
W02H5.2	WBGene00020957	1198.9	0.338533	0.105092	3.22129	0.00127615	0.0115996
gop-1	WBGene00001660	700.127	0.344491	0.106964	3.22061	0.00127917	0.01162
glna-2	WBGene00008435	258.489	-0.639368	0.19854	-3.22035	0.00128036	0.0116237
sad-1	WBGene00004719	72.3572	-0.941942	0.292563	-3.21963	0.00128358	0.0116411
W02A11.6	WBGene00014852	22.8644	1.18786	0.36895	3.21957	0.00128384	0.0116411
C09B8.4	WBGene00015623	480.433	-0.587929	0.182672	-3.21849	0.00128869	0.011678
unc-24	WBGene00006761	25.9185	-1.25754	0.390839	-3.21754	0.00129293	0.0116952
T26C5.2	WBGene00012032	59.419	-1.05583	0.328143	-3.2176	0.00129269	0.0116952
Y57G11B.2	WBGene00013295	44.8896	-1.26395	0.3928	-3.21779	0.00129183	0.0116952
hmp-2	WBGene00001979	2402.8	0.282272	0.0877341	3.21736	0.00129378	0.0116957
dhs-13	WBGene00000976	1813.87	0.267381	0.0831351	3.21622	0.00129891	0.0117124
hcp-2	WBGene00001830	4714.13	0.270864	0.0842199	3.21615	0.00129924	0.0117124
tdo-2	WBGene00016201	816.527	-0.571858	0.177812	-3.21608	0.00129954	0.0117124
R02F2.4	WBGene00019833	1129.06	0.224999	0.0699532	3.21643	0.00129798	0.0117124
sftb-2	WBGene00021004	3730.66	0.207143	0.0644022	3.2164	0.0012981	0.0117124
smi-1	WBGene00004886	492.86	0.236595	0.0735806	3.21546	0.00130237	0.0117307
cpt-6	WBGene00020911	398.489	-0.477233	0.148431	-3.21518	0.00130365	0.0117352
T18D3.6	WBGene00011823	199.999	0.514713	0.160104	3.21487	0.00130503	0.0117405
E01G4.7	WBGene00045410	121.691	-0.52409	0.163039	-3.21451	0.00130668	0.0117483
gpi-1	WBGene00013597	5032.27	0.193373	0.0601675	3.21391	0.00130941	0.0117658
inx-16	WBGene00002138	413.701	-0.363612	0.113174	-3.21286	0.00131419	0.0117804
K01G5.5	WBGene00010478	8077.64	0.256215	0.0797441	3.21296	0.00131372	0.0117804
sec-12	WBGene00010496	1264.19	0.193799	0.0603155	3.21309	0.00131316	0.0117804
crh-2	WBGene00016162	1542.87	0.250423	0.0779419	3.21295	0.0013138	0.0117804
srp-1	WBGene00005642	307.262	0.340795	0.10608	3.21262	0.00131531	0.0117833
tlf-1	WBGene00006577	1635.98	0.309109	0.0962537	3.2114	0.0013209	0.0118263
F57G8.5	WBGene00010214	26.3098	-1.25921	0.392376	-3.20918	0.00133114	0.0119109
smp-2	WBGene00004890	439.221	-0.441115	0.137476	-3.20867	0.0013335	0.0119183
B0491.7	WBGene00007194	488.928	0.342059	0.106605	3.20866	0.00133357	0.0119183
rpl-6	WBGene00004417	29281.1	0.187421	0.0584421	3.20694	0.00134153	0.0119751
tra-1	WBGene00006604	1292.08	0.749566	0.233732	3.20695	0.0013415	0.0119751
lrr-1	WBGene00018016	1781.03	0.201909	0.062965	3.20669	0.00134271	0.0119785
emb-9	WBGene00001263	12509.7	0.507772	0.158421	3.20521	0.00134964	0.0120331
xpo-3	WBGene00002080	2840.98	0.315902	0.0985854	3.20435	0.00135368	0.0120619
acly-1	WBGene00016995	3460.46	0.445761	0.139154	3.20337	0.00135829	0.0120958
lin-24	WBGene00003010	1317.18	0.187992	0.0587001	3.20259	0.00136199	0.0121171
C48D1.1	WBGene00008177	67.5761	-0.707929	0.221065	-3.20235	0.00136312	0.0121171
erp-44.1	WBGene00016278	1695.16	0.169049	0.0527888	3.20236	0.00136306	0.0121171
del-1	WBGene00000952	11.9401	-1.88976	0.590259	-3.20158	0.00136676	0.0121346
rbg-3	WBGene00007167	3806.57	0.159923	0.0499539	3.20142	0.00136753	0.0121346
btb-9	WBGene00018435	48.0712	-0.831857	0.25983	-3.20154	0.00136695	0.0121346
daz-1	WBGene00000935	7943.92	0.366053	0.114367	3.20068	0.00137104	0.0121585
T13F2.6	WBGene00011746	3720.81	0.231033	0.0721895	3.20037	0.0013725	0.0121642
mab-31	WBGene00021834	402.705	-0.46384	0.144949	-3.20002	0.00137419	0.0121716
K07F5.22	WBGene00303023	30.9724	-18.2321	5.69778	-3.19986	0.00137496	0.0121716
Y67D2.7	WBGene00022057	1365.5	0.198156	0.0619349	3.19942	0.00137703	0.0121826
Y54E10BR.2	WBGene00021841	1309.41	0.263845	0.0825139	3.19758	0.00138585	0.0122535
ccf-1	WBGene00000369	2482.75	0.388307	0.121494	3.19611	0.00139295	0.0123073
tag-153	WBGene00006499	4829.5	0.315521	0.0987245	3.19598	0.00139359	0.0123073
Y48E1C.2	WBGene00013015	629.592	0.225776	0.0706506	3.19566	0.00139509	0.0123133
asic-1	WBGene00022815	11.7542	-1.88483	0.589867	-3.19534	0.00139664	0.0123197
F37F2.2	WBGene00018159	484.553	0.27734	0.086807	3.19491	0.00139875	0.012331
exos-2	WBGene00022232	890.708	0.243257	0.0761443	3.19469	0.00139983	0.0123332
Y69A2AR.1	WBGene00022074	1985.11	0.386744	0.121103	3.19352	0.00140548	0.0123757
T10E10.4	WBGene00020421	11.4471	-2.45801	0.769821	-3.19297	0.00140817	0.0123921
cdc-48.1	WBGene00007352	19629.9	0.310105	0.0971675	3.19145	0.00141561	0.0124502
mec-9	WBGene00003173	27.6404	-1.1448	0.358732	-3.19125	0.00141659	0.0124515
spe-5	WBGene00004959	233.158	0.390894	0.122517	3.19054	0.00142008	0.0124748
R09F10.1	WBGene00019986	339.879	-0.367048	0.115058	-3.19012	0.00142215	0.0124857
pms-2	WBGene00004064	1788.44	0.36502	0.114457	3.18915	0.00142693	0.0125129
emc-1	WBGene00019209	4883.26	0.234963	0.0736728	3.18927	0.00142631	0.0125129
oma-2	WBGene00003865	10383.2	0.241587	0.0757799	3.18801	0.00143254	0.0125253
M01B12.4	WBGene00019697	2551.05	0.354723	0.111268	3.18802	0.00143252	0.0125253
Y46H3C.7	WBGene00021607	243.705	0.431411	0.135312	3.18827	0.00143127	0.0125253
ZC581.9	WBGene00022635	50.7886	-0.773705	0.242672	-3.18828	0.00143124	0.0125253
hot-9	WBGene00044484	13.9764	-1.55338	0.48725	-3.18806	0.00143233	0.0125253
rnp-6	WBGene00004389	2721.28	0.191701	0.0602302	3.18281	0.00145855	0.0127452
F48E8.4	WBGene00018611	2217.1	0.469046	0.147388	3.1824	0.00146062	0.0127558
acr-20	WBGene00000059	13.7169	-1.78888	0.562146	-3.18222	0.00146149	0.012756
tofu-5	WBGene00012167	1789.8	0.208588	0.0655684	3.18123	0.00146652	0.0127924
C26D10.4	WBGene00007745	41.9565	-0.765257	0.240608	-3.18051	0.00147015	0.0128098
ccep-290	WBGene00021643	38.0028	-1.16696	0.366912	-3.1805	0.00147023	0.0128098
odr-2	WBGene00003849	15.0408	-1.76651	0.55574	-3.17866	0.00147955	0.012876
fntb-1	WBGene00006465	1615.14	0.194921	0.0613213	3.17869	0.00147944	0.012876
mdt-26	WBGene00016115	2910.93	0.442885	0.139354	3.17812	0.00148232	0.0128893
R02C2.6	WBGene00019817	20.9326	-1.40936	0.44347	-3.17803	0.00148281	0.0128893
skpt-1	WBGene00018613	2529.66	0.216976	0.0682844	3.17754	0.00148532	0.0129036
C49F5.7	WBGene00008211	382.99	-0.468208	0.147376	-3.17696	0.0014883	0.012922
zwl-1	WBGene00021460	2406.66	0.237554	0.0747914	3.17622	0.00149207	0.0129472
pqn-37	WBGene00004124	63.7699	-0.661119	0.208167	-3.17591	0.00149367	0.0129483
rpoa-49	WBGene00017749	1164.26	0.256939	0.0809038	3.17586	0.00149394	0.0129483
top-3	WBGene00006596	947.333	0.25711	0.080962	3.17569	0.00149482	0.0129484
Y39A1A.24	WBGene00012660	751.096	0.279861	0.0881356	3.17535	0.00149656	0.012956
Y71H2B.2	WBGene00022192	1738.8	0.232866	0.0733649	3.17408	0.00150311	0.0130052
noca-1	WBGene00011647	5786.11	0.249471	0.0786006	3.1739	0.00150404	0.0130057
F23D12.4	WBGene00009088	20.1078	-1.38366	0.436033	-3.17329	0.00150719	0.0130139
parn-1	WBGene00010734	932.912	-0.300396	0.094659	-3.17346	0.00150634	0.0130139
acp-7	WBGene00022246	134.479	-0.559753	0.176399	-3.17322	0.00150761	0.0130139
fzy-1	WBGene00001511	3612.74	0.197536	0.0622775	3.17186	0.00151464	0.0130595
pat-12	WBGene00003936	1944.66	0.347056	0.109416	3.1719	0.00151444	0.0130595
nhr-66	WBGene00003656	2255.86	0.24411	0.0769664	3.17164	0.00151579	0.0130619
clk-2	WBGene00000537	1320.29	0.24274	0.0765498	3.17101	0.00151911	0.0130829
vab-9	WBGene00006875	83.9128	-0.696903	0.219867	-3.16966	0.00152617	0.0131361
yop-1	WBGene00022127	5678.85	0.310664	0.0980231	3.1693	0.00152808	0.013145
ubc-25	WBGene00006720	5305.54	0.160969	0.0507975	3.16884	0.0015305	0.0131582
C24H10.1	WBGene00016067	45.5866	-0.906297	0.286045	-3.16837	0.00153297	0.0131719
mes-2	WBGene00003220	1839.58	0.220923	0.0697353	3.16802	0.00153482	0.0131802
let-4	WBGene00002282	105.634	-1.1297	0.356649	-3.16755	0.00153729	0.0131887
C34D1.4	WBGene00007931	56.2282	-0.987981	0.311912	-3.1675	0.00153758	0.0131887
cfz-2	WBGene00000478	122.865	-1.00158	0.316273	-3.16683	0.00154111	0.0131944
glr-1	WBGene00001612	17.0426	-1.7147	0.541422	-3.16704	0.00154001	0.0131944
spn-4	WBGene00004984	20580	0.279307	0.0882106	3.16637	0.00154355	0.0131944
xpf-1	WBGene00008140	2020.76	0.232252	0.0733429	3.16666	0.00154201	0.0131944
gtbp-1	WBGene00010677	9855.08	0.262948	0.0830434	3.16639	0.00154344	0.0131944
phf-15	WBGene00021810	1232.46	0.42459	0.134079	3.16673	0.00154165	0.0131944
rde-11	WBGene00023421	787.964	0.223572	0.0706253	3.16561	0.00154761	0.0132215
ins-3	WBGene00002086	11.7268	-1.8544	0.586003	-3.1645	0.00155352	0.0132645
mlc-2	WBGene00003370	10755.1	0.328202	0.103739	3.16374	0.00155756	0.0132914
tbck-1	WBGene00016352	503.522	0.299191	0.0945909	3.163	0.00156153	0.0133176
mom-2	WBGene00003395	3778.83	0.398496	0.125996	3.16276	0.00156281	0.0133188
mup-2	WBGene00003495	5592.42	0.410215	0.129706	3.16264	0.00156345	0.0133188
tos-1	WBGene00019466	7345.72	0.394827	0.12488	3.16164	0.00156882	0.0133569
prx-12	WBGene00004197	77.0336	-0.656922	0.207807	-3.16121	0.00157114	0.013369
rpl-9	WBGene00004420	20518.3	0.187494	0.0593454	3.15936	0.00158116	0.0134389
rsp-1	WBGene00004698	3140.27	0.203306	0.0643487	3.15944	0.00158072	0.0134389
R06C1.4	WBGene00011059	1836.66	-0.44677	0.141429	-3.15898	0.00158325	0.013449
tasp-1	WBGene00010480	1378.34	0.186751	0.0591603	3.1567	0.00159565	0.0135423
C01B10.8	WBGene00015282	2057.04	0.161363	0.05112	3.15655	0.00159649	0.0135423
C17E4.20	WBGene00219313	613.51	-0.433914	0.137469	-3.15646	0.00159695	0.0135423
C09F9.7	WBGene00045322	25.2205	-4.35079	1.37875	-3.15561	0.00160161	0.0135741
sph-1	WBGene00004979	229.381	-0.43501	0.137948	-3.15344	0.00161359	0.0136561
hpo-40	WBGene00014113	2730.4	0.318964	0.101151	3.15336	0.00161402	0.0136561
fbxc-29	WBGene00019923	26.6139	-1.43658	0.455541	-3.15357	0.00161285	0.0136561
ubr-1	WBGene00016326	5165.64	0.347634	0.110266	3.1527	0.0016177	0.0136795
T11G6.2	WBGene00011717	353.797	-0.407414	0.129274	-3.15154	0.00162411	0.0137258
fum-1	WBGene00001503	4990.31	0.261675	0.0830511	3.15077	0.00162839	0.0137542
C25H3.11	WBGene00016120	3229.41	0.464593	0.147481	3.15019	0.00163163	0.0137738
inx-7	WBGene00002129	524.033	0.372789	0.118356	3.14974	0.00163416	0.0137795
cyh-1	WBGene00021714	861.193	0.361956	0.114914	3.14981	0.00163376	0.0137795
ccm-3	WBGene00007561	1005.79	0.206104	0.0654601	3.14854	0.0016409	0.0138286
inst-1	WBGene00015499	3382.11	0.451454	0.143419	3.14781	0.00164501	0.0138554
nhx-1	WBGene00003729	52.9513	-0.829737	0.263647	-3.14715	0.00164869	0.0138785
alh-4	WBGene00000110	2801.81	0.253095	0.0804247	3.14698	0.00164964	0.0138787
iars-1	WBGene00002152	6479.22	0.188001	0.059758	3.14604	0.00165499	0.0139159
fbxb-106	WBGene00017911	14.6586	-1.87512	0.596059	-3.14587	0.00165594	0.0139161
swsn-2.2	WBGene00015971	2062.3	0.227356	0.0722913	3.145	0.00166089	0.0139498
gln-6	WBGene00001607	12520.9	0.207242	0.0659028	3.14467	0.00166275	0.0139575
R03E9.2	WBGene00019843	76.9907	-0.784722	0.249588	-3.14408	0.00166613	0.013978
flad-1	WBGene00011271	1472.87	0.255098	0.0811501	3.14353	0.00166925	0.0139964
etr-1	WBGene00001340	1958.93	0.288471	0.0917809	3.14305	0.001672	0.0140116
ubc-20	WBGene00006715	2439.74	0.195189	0.0621165	3.14231	0.0016762	0.0140389
nex-1	WBGene00003588	2699.39	0.257736	0.0820752	3.14025	0.00168806	0.0141183
Y39A1C.1	WBGene00012662	40.9462	-0.917987	0.292337	-3.14017	0.00168852	0.0141183
rsr-2	WBGene00013260	1896.31	0.265496	0.0845416	3.14042	0.00168705	0.0141183
B0334.5	WBGene00007145	1044.29	0.378683	0.12062	3.13946	0.00169262	0.0141446
ppfr-4	WBGene00022193	1215.62	0.245651	0.078253	3.13919	0.00169418	0.0141498
lpr-5	WBGene00012256	155.511	-1.07234	0.341698	-3.13826	0.00169955	0.0141826
F28B4.3	WBGene00017892	4763.18	-0.779565	0.248413	-3.13818	0.00170002	0.0141826
zim-2	WBGene00011600	1094.84	0.252299	0.0804043	3.13788	0.00170176	0.0141893
gip-1	WBGene00001589	1744.11	0.229783	0.0732392	3.13743	0.00170436	0.0141996
F07A11.4	WBGene00008547	412.761	-0.471015	0.150132	-3.13734	0.0017049	0.0141996
ymel-1	WBGene00010842	2032.99	0.404478	0.128932	3.13714	0.00170608	0.0142014
F17C11.7	WBGene00008918	1949.7	0.217902	0.0694662	3.1368	0.00170802	0.0142097
cct-5	WBGene00000380	9621.79	0.169291	0.0539833	3.13598	0.00171281	0.014234
C46F11.4	WBGene00008119	1551.91	0.22909	0.0730524	3.13597	0.00171285	0.014234
egl-13	WBGene00001182	218.964	-0.467332	0.1491	-3.13435	0.00172235	0.0143041
lpr-4	WBGene00012257	115.287	-1.24956	0.398683	-3.13421	0.0017232	0.0143041
R01H10.7	WBGene00010975	1990.45	0.415005	0.132499	3.13214	0.00173539	0.0143973
slr-2	WBGene00013350	684.987	0.466359	0.14894	3.13118	0.00174106	0.0144363
let-363	WBGene00002583	5247.3	0.436829	0.139543	3.13043	0.00174551	0.0144652
col-119	WBGene00000693	58422.7	0.342545	0.109471	3.12911	0.00175337	0.0144932
mlc-3	WBGene00003371	8658.73	0.326531	0.104354	3.12907	0.00175359	0.0144932
Y6D1A.2	WBGene00012396	23.1849	-1.28282	0.40994	-3.12928	0.00175233	0.0144932
M151.3	WBGene00019795	158.194	0.52747	0.168572	3.12905	0.00175375	0.0144932
F53E2.2	WBGene00302980	8970.96	0.190467	0.0608618	3.1295	0.00175102	0.0144932
F41C3.5	WBGene00018271	9955.47	0.258331	0.0825659	3.12879	0.00175531	0.014498
pph-6	WBGene00007922	1644.18	0.143534	0.0458815	3.12837	0.00175776	0.0145103
rpn-13	WBGene00016981	3737.77	0.147561	0.047175	3.12794	0.00176034	0.0145156
clec-180	WBGene00017991	61.6795	-1.25714	0.401901	-3.12798	0.00176014	0.0145156
acbp-6	WBGene00012457	36.1392	-1.11825	0.357634	-3.12681	0.00176712	0.0145634
acdh-11	WBGene00012860	1221.5	0.261133	0.083536	3.126	0.00177203	0.0145957
pqn-27	WBGene00004116	1618.59	0.322913	0.10335	3.12445	0.00178141	0.0146649
pat-9	WBGene00003933	150.605	-0.859056	0.274996	-3.12388	0.00178481	0.0146848
osm-12	WBGene00003892	11.8125	-1.91519	0.613346	-3.12253	0.00179304	0.0147445
ztf-16	WBGene00019960	123.513	-0.776613	0.248749	-3.12207	0.00179581	0.0147591
athp-3	WBGene00013799	81.1862	-0.608315	0.194876	-3.12154	0.00179907	0.0147778
fbxb-92	WBGene00044693	19.2119	-1.58211	0.506882	-3.12127	0.00180075	0.0147834
mrpl-22	WBGene00012645	638.127	0.266696	0.085471	3.12031	0.00180663	0.0148235
C50D2.8	WBGene00016811	908.642	0.300136	0.0962019	3.11985	0.00180942	0.0148382
immt-2	WBGene00012315	3026.12	0.202421	0.0648909	3.11941	0.00181212	0.0148441
Y65B4BL.4	WBGene00022036	934.246	0.304274	0.0975389	3.11952	0.00181149	0.0148441
cdc-42	WBGene00000390	3921.47	0.23497	0.0753374	3.11891	0.00181524	0.0148452
unc-16	WBGene00006755	3101.88	0.339303	0.108787	3.11896	0.0018149	0.0148452
fbxb-94	WBGene00013410	10.1058	-4.188	1.34278	-3.11891	0.00181521	0.0148452
tank-1	WBGene00004053	1885.42	0.715954	0.229649	3.11761	0.00182326	0.0149026
glrx-3	WBGene00017062	1745.4	0.19141	0.0614253	3.11614	0.00183238	0.014969
R05D3.12	WBGene00019884	1381.24	0.195184	0.0626434	3.1158	0.00183446	0.0149777
ZK632.4	WBGene00014013	2912.25	0.182629	0.0586407	3.11437	0.00184339	0.0150425
F31C3.2	WBGene00009284	2521.29	0.488777	0.156975	3.11373	0.00184737	0.0150667
Y73E7A.3	WBGene00022270	122.013	-0.546143	0.175411	-3.1135	0.00184883	0.0150704
kin-18	WBGene00002201	5385.93	0.338955	0.108884	3.113	0.00185196	0.0150751
F13H8.2	WBGene00017435	2472.16	0.182702	0.0586879	3.11312	0.00185123	0.0150751
F49D11.10	WBGene00045433	748.77	0.467967	0.150331	3.11292	0.00185244	0.0150751
sqv-6	WBGene00005024	2239.52	0.275314	0.0884475	3.11274	0.00185356	0.015076
spr-5	WBGene00005010	2222.77	0.223129	0.0717182	3.11119	0.00186337	0.0151475
noah-2	WBGene00009926	731.618	-0.850861	0.273507	-3.11093	0.001865	0.0151525
wrn-1	WBGene00006944	2144.04	0.365649	0.117549	3.11061	0.00186701	0.0151606
plst-1	WBGene00022425	3196.08	0.17838	0.057369	3.10935	0.00187501	0.0152172
ltah-1.1	WBGene00016589	1934.86	0.248076	0.0798302	3.10754	0.00188649	0.0153021
F53G2.12	WBGene00302998	420.818	0.326019	0.104932	3.10694	0.00189033	0.0153249
elp-1	WBGene00001248	143.637	-0.525018	0.16901	-3.10643	0.00189362	0.0153433
inx-19	WBGene00002141	17.2532	-2.01553	0.648948	-3.10585	0.00189734	0.0153484
rps-22	WBGene00004491	13307.9	0.201197	0.0647785	3.10592	0.00189688	0.0153484
frpr-19	WBGene00021510	135.099	0.485345	0.156264	3.10593	0.00189681	0.0153484
B0432.7	WBGene00015188	897.559	0.294408	0.0948835	3.10283	0.0019168	0.0154974
vps-39	WBGene00011625	3663.2	0.362916	0.117012	3.10154	0.00192519	0.0155569
cpsf-4	WBGene00044329	1830.88	0.159595	0.0514634	3.10114	0.00192777	0.0155693
hpo-10	WBGene00017158	1335.42	0.162048	0.0522575	3.10095	0.00192901	0.0155708
nhr-204	WBGene00019816	56.4803	-0.849245	0.273886	-3.10073	0.00193046	0.0155741
T26E3.8	WBGene00012041	20.7689	-1.49125	0.481066	-3.09989	0.00193594	0.0156099
crn-2	WBGene00000795	333.899	0.313005	0.101021	3.09841	0.0019456	0.0156539
Y43F8C.13	WBGene00012834	469.604	-0.287985	0.0929442	-3.09847	0.0019452	0.0156539
vrk-1	WBGene00017895	3443.9	0.194429	0.0627491	3.09852	0.00194491	0.0156539
C30G7.2	WBGene00044176	35.6846	-0.932613	0.300956	-3.09884	0.00194281	0.0156539
rbc-2	WBGene00004314	2117.33	0.432846	0.139772	3.0968	0.0019562	0.0157138
gadr-2	WBGene00007887	40.742	-0.992648	0.320527	-3.09692	0.00195541	0.0157138
T06A1.5	WBGene00020280	152.673	-0.541104	0.174714	-3.09708	0.00195435	0.0157138
nlp-11	WBGene00003749	91.5978	-0.659433	0.213039	-3.09537	0.00196567	0.0157814
sep-1	WBGene00004775	4630.98	0.359975	0.116332	3.09437	0.00197229	0.0158175
F46C5.6	WBGene00009781	101.66	-0.58415	0.18877	-3.09451	0.0019714	0.0158175
C16D9.1	WBGene00015857	9.52279	-1.98581	0.641822	-3.09402	0.00197466	0.015828
tbc-14	WBGene00008444	1647.67	0.306576	0.0991167	3.09308	0.00198088	0.0158694
arrd-13	WBGene00011054	773.546	0.318395	0.102947	3.0928	0.0019828	0.0158763
C50E3.12	WBGene00016823	684.354	0.312164	0.100973	3.09158	0.00199096	0.015933
sphk-1	WBGene00007918	514.257	-0.299792	0.0969834	-3.09117	0.00199373	0.0159395
F38B7.2	WBGene00009533	63.3029	-1.1544	0.373455	-3.09114	0.0019939	0.0159395
attf-6	WBGene00012474	2406.26	0.736346	0.238378	3.08899	0.00200841	0.0160469
R09H10.5	WBGene00011182	2113.37	-0.677016	0.219183	-3.08882	0.00200953	0.0160472
men-1	WBGene00012983	3376.16	0.281186	0.0910496	3.08828	0.00201322	0.0160633
lin-38	WBGene00013006	853.042	0.56895	0.184233	3.0882	0.0020137	0.0160633
imp-1	WBGene00007979	4466.26	0.263677	0.0854243	3.08667	0.00202409	0.0161376
R03H10.11	WBGene00271824	16.0751	-1.5414	0.499446	-3.08622	0.00202719	0.0161537
T04F3.2	WBGene00011437	19.6439	-1.18121	0.382966	-3.08438	0.00203979	0.0162374
best-17	WBGene00020559	48.06	-0.755812	0.245046	-3.08436	0.00203988	0.0162374
F56G4.4	WBGene00010159	1528.09	0.217943	0.0707039	3.08248	0.00205287	0.0163154
vacl-14	WBGene00010565	1531.12	0.231094	0.0749634	3.08276	0.0020509	0.0163154
C14B9.2	WBGene00015752	1134.79	-0.375845	0.121936	-3.0823	0.00205405	0.0163154
hrpf-2	WBGene00022253	2245.16	0.206328	0.066938	3.08237	0.00205358	0.0163154
ZK643.9	WBGene00045132	19.4345	-1.43035	0.46415	-3.08165	0.00205857	0.0163426
ebp-1	WBGene00013344	816.826	0.390296	0.126667	3.08127	0.00206123	0.0163551
rrn-1.1	WBGene00004512	204813	-1.12216	0.364362	-3.0798	0.00207139	0.0164269
F56F10.1	WBGene00018984	1089.55	-0.390672	0.126889	-3.07885	0.00207798	0.0164705
col-140	WBGene00000713	42815.9	0.443212	0.143987	3.07814	0.00208295	0.0164849
kcc-3	WBGene00019289	75.7854	-0.606802	0.197121	-3.07831	0.00208176	0.0164849
ZC8.6	WBGene00022501	294.55	0.346441	0.11255	3.07812	0.00208311	0.0164849
W02F12.4	WBGene00020949	1258.17	0.169083	0.0549406	3.07756	0.00208701	0.016507
T26C12.1	WBGene00020831	2644.29	0.2459	0.0799101	3.07721	0.0020895	0.0165179
W07E11.1	WBGene00012326	3537.12	0.5881	0.191219	3.07553	0.00210125	0.016602
ins-6	WBGene00002089	24.4472	-1.04936	0.341247	-3.07506	0.00210458	0.0166195
gfi-2	WBGene00001582	3052.77	0.17642	0.0573827	3.07444	0.00210896	0.0166453
snpc-3.3	WBGene00021662	50.8315	-0.875067	0.284643	-3.07426	0.00211025	0.0166467
gfat-2	WBGene00009035	14076.4	0.226009	0.0735271	3.07382	0.00211337	0.0166625
hch-1	WBGene00001828	227.82	-1.20934	0.393507	-3.07325	0.00211743	0.0166769
Y48B6A.13	WBGene00012984	492.559	0.319893	0.104085	3.07339	0.00211643	0.0166769
F16A11.1	WBGene00008876	2118.62	0.194952	0.0634422	3.07291	0.00211983	0.016687
far-7	WBGene00001391	18.3706	-1.54435	0.502674	-3.07227	0.0021244	0.0167141
C41D11.6	WBGene00016565	71.0371	1.64091	0.534223	3.07158	0.00212929	0.0167403
igcm-3	WBGene00020160	879.85	-0.552968	0.180033	-3.07149	0.00212997	0.0167403
rcor-1	WBGene00022278	2400.19	0.30631	0.0997806	3.06983	0.00214178	0.0168242
C30B5.2	WBGene00016244	1076.17	0.210706	0.0686437	3.06956	0.00214374	0.0168308
sap-49	WBGene00004723	1975.36	0.355688	0.115898	3.06898	0.0021479	0.0168546
Y57A10A.8	WBGene00013253	613.996	0.284745	0.0927907	3.06868	0.00215004	0.0168625
uba-5	WBGene00020184	1693.52	0.185437	0.0604568	3.06727	0.00216024	0.0169336
rin-1	WBGene00008183	3714.91	0.369449	0.12049	3.06622	0.00216782	0.0169841
C47E12.3	WBGene00008148	1107.13	0.18607	0.0607407	3.06334	0.00218879	0.0171394
pgl-3	WBGene00003994	4781.59	0.238051	0.0777237	3.06278	0.0021929	0.0171536
snt-1	WBGene00004921	84.6919	-0.61218	0.199876	-3.0628	0.00219279	0.0171536
hsf-1	WBGene00002004	2724.34	0.238866	0.0780026	3.06228	0.00219656	0.0171732
ndfl-4	WBGene00010958	434.259	-0.68629	0.224131	-3.062	0.00219862	0.0171803
npp-11	WBGene00003797	2964.18	0.367521	0.120042	3.0616	0.00220159	0.0171945
T26A5.2	WBGene00020819	1527.4	0.209963	0.0686015	3.06062	0.00220876	0.0172415
dld-1	WBGene00010794	6201.63	0.317112	0.103625	3.06019	0.00221197	0.0172575
Y54F10AR.1	WBGene00021854	1880.92	0.282587	0.0923735	3.05918	0.00221947	0.017307
rnp-7	WBGene00004390	1580.04	0.142392	0.0465815	3.05684	0.00223684	0.0174333
ceh-38	WBGene00000459	3149.16	0.254476	0.0832794	3.05569	0.00224542	0.017491
aka-1	WBGene00000101	7268.89	0.303821	0.0994856	3.05392	0.00225876	0.0175858
hmg-20	WBGene00012209	594.906	0.383373	0.125562	3.05326	0.0022637	0.0176151
cdc-5L	WBGene00008386	5485.11	0.222493	0.0728761	3.05302	0.00226547	0.0176161
T23G11.7	WBGene00011972	1669.65	0.160731	0.0526482	3.05293	0.00226619	0.0176161
kdin-1	WBGene00006490	2610.07	0.2967	0.0971955	3.05261	0.00226862	0.0176258
T10C6.7	WBGene00011689	1239.38	0.254935	0.0835461	3.05142	0.00227759	0.0176679
cst-1	WBGene00017472	380.478	-0.438294	0.143628	-3.05159	0.00227633	0.0176679
hsp-75	WBGene00020110	2837.27	0.168911	0.0553519	3.05158	0.00227644	0.0176679
Y54E5B.2	WBGene00013204	785.107	0.290716	0.0952882	3.05091	0.00228148	0.0176888
dog-1	WBGene00001049	1527.17	0.215558	0.070673	3.05008	0.00228781	0.0177195
fbxa-216	WBGene00012953	92.843	-0.656461	0.215219	-3.0502	0.00228689	0.0177195
hex-4	WBGene00021766	1037.04	0.251403	0.0824355	3.0497	0.00229072	0.0177329
smg-1	WBGene00004879	3317.53	0.411495	0.134959	3.04905	0.00229569	0.0177573
cutl-21	WBGene00018861	18.5571	-1.89029	0.619976	-3.04897	0.00229625	0.0177573
tbc-9	WBGene00012868	2772.14	0.290725	0.0953786	3.04812	0.0023028	0.0177987
ZC487.1	WBGene00022623	21.332	-1.62627	0.533744	-3.04691	0.00231209	0.0178613
C29A12.6	WBGene00007800	14.625	-2.00349	0.657752	-3.04597	0.00231933	0.0179079
Y50D7A.3	WBGene00021753	1596.8	0.179183	0.0588298	3.04578	0.00232077	0.0179098
T24G10.2	WBGene00020779	2537.23	0.154686	0.0507941	3.04536	0.00232406	0.0179259
tbc-3	WBGene00009322	1743.12	0.189057	0.0620958	3.0446	0.00232989	0.0179616
cpb-1	WBGene00000770	1059.25	0.489919	0.160973	3.04349	0.00233848	0.0180185
act-3	WBGene00000065	31111.5	0.399024	0.13116	3.04228	0.00234794	0.0180541
Y116A8C.27	WBGene00013804	847.102	0.259005	0.0851269	3.04257	0.00234563	0.0180541
cnnm-1	WBGene00016879	345.148	-0.343676	0.112961	-3.04242	0.00234688	0.0180541
W07B8.4	WBGene00021072	24.3528	1.81867	0.597779	3.04238	0.00234717	0.0180541
dpff-1	WBGene00016200	1614.29	0.148129	0.0486949	3.04197	0.00235035	0.0180633
B0464.9	WBGene00007188	1046.18	0.308105	0.101316	3.04102	0.00235778	0.0180902
lact-4	WBGene00010877	268.32	-0.509199	0.167437	-3.04114	0.00235686	0.0180902
T28D6.4	WBGene00012124	81.5642	-0.705129	0.231881	-3.0409	0.00235869	0.0180902
ekl-4	WBGene00013676	1898.09	0.304896	0.100251	3.04133	0.00235534	0.0180902
paqr-1	WBGene00016610	2194.01	0.175672	0.0577807	3.04032	0.00236327	0.0181159
K07F5.16	WBGene00010640	114.913	0.622054	0.204627	3.03994	0.00236622	0.0181293
fbxb-65	WBGene00008066	8.49274	-2.76175	0.908838	-3.03876	0.00237551	0.0181911
par-3	WBGene00003918	6694.74	0.429792	0.14155	3.03632	0.00239488	0.0183207
lab-1	WBGene00007278	629.284	-0.335109	0.110363	-3.03642	0.0023941	0.0183207
set-5	WBGene00008145	1341.66	0.381957	0.125829	3.03551	0.00240127	0.018359
R151.1	WBGene00020106	85.5015	-0.673295	0.221816	-3.03538	0.00240236	0.018359
nduf-5	WBGene00021839	1179.8	0.182041	0.0599791	3.03507	0.00240479	0.0183682
F44E7.4	WBGene00018426	9412.6	0.264181	0.0870538	3.03469	0.00240783	0.018382
gmps-1	WBGene00010912	2578.25	0.22293	0.0734894	3.0335	0.00241737	0.0184454
pmr-1	WBGene00004063	1874.27	0.201461	0.0664307	3.03265	0.00242415	0.0184783
F20G2.2	WBGene00008986	312.099	-0.331615	0.109345	-3.03273	0.0024235	0.0184783
cnc-2	WBGene00000556	79.9788	-1.14858	0.378829	-3.03191	0.00243013	0.0185144
rnp-1	WBGene00004384	1915.92	0.209014	0.0689468	3.03152	0.00243323	0.0185191
R74.8	WBGene00011282	4234.42	0.205418	0.0677598	3.03155	0.00243298	0.0185191
hil-5	WBGene00001856	6731.1	0.328372	0.108328	3.03128	0.00243523	0.0185249
ZK185.3	WBGene00022683	137.7	-0.452222	0.149193	-3.03111	0.00243655	0.0185255
F39B2.8	WBGene00009558	68.8648	-0.685148	0.226071	-3.03067	0.0024401	0.018543
acbp-3	WBGene00009818	187.022	-0.467477	0.154331	-3.02906	0.00245316	0.0186328
yars-1	WBGene00013677	2023.75	0.185762	0.0613435	3.02823	0.00245988	0.0186744
rsy-1	WBGene00013177	1002.09	0.187685	0.0619875	3.02778	0.00246355	0.0186881
btbd-10	WBGene00019888	2592.3	0.309449	0.102216	3.0274	0.00246666	0.0186881
Y47G6A.14	WBGene00021640	716.379	0.248011	0.0819221	3.0274	0.0024667	0.0186881
F07E5.13	WBGene00304173	18.4867	-1.89741	0.626713	-3.02755	0.00246543	0.0186881
pqn-22	WBGene00004112	4446.62	0.389935	0.128829	3.02676	0.00247186	0.0187136
K10D3.6	WBGene00010740	10.9812	-1.60058	0.528825	-3.02668	0.00247258	0.0187136
C05D11.8	WBGene00015485	1455.43	0.316022	0.104452	3.02552	0.00248203	0.0187756
Y76A2B.5	WBGene00013577	1484.42	0.185776	0.061426	3.02438	0.00249141	0.018837
gld-4	WBGene00014115	8210.08	0.354345	0.117189	3.0237	0.00249703	0.0188696
F52D2.12	WBGene00219451	630.482	0.499719	0.165275	3.02355	0.00249824	0.0188696
mog-5	WBGene00003393	3869.51	0.213489	0.0706189	3.02311	0.00250188	0.0188875
mrp-4	WBGene00003410	8270.53	0.458976	0.151932	3.02094	0.00251993	0.0190142
fbxb-47	WBGene00019045	15.8466	-1.55716	0.51554	-3.02045	0.00252402	0.0190354
unc-36	WBGene00006772	156.448	-0.886587	0.293573	-3.01999	0.00252786	0.0190547
mcm-6	WBGene00003158	7163.52	0.200286	0.0663332	3.0194	0.00253278	0.0190821
cnd-1	WBGene00000561	19.8246	-1.80676	0.598416	-3.01924	0.00253413	0.0190827
F31C3.15	WBGene00198814	112.073	-1.17165	0.388152	-3.01853	0.00254005	0.0191176
B0019.2	WBGene00007094	1136.42	0.227326	0.0753346	3.01756	0.00254823	0.0191695
gpa-17	WBGene00022196	82.3366	-0.652442	0.216259	-3.01695	0.00255333	0.0191982
lir-2	WBGene00003045	572.445	0.23196	0.0769053	3.01618	0.00255981	0.0192372
R07C12.2	WBGene00019932	172.317	-0.537165	0.178106	-3.01599	0.00256142	0.0192397
fzr-1	WBGene00001510	2478.38	0.474186	0.157278	3.01497	0.00257009	0.0192853
rpac-40	WBGene00019275	1112.28	0.236866	0.0785602	3.01509	0.00256901	0.0192853
lpd-3	WBGene00003060	3411.49	0.521276	0.172925	3.01447	0.00257432	0.0193074
F25B4.8	WBGene00017771	70.2085	-0.762084	0.252834	-3.01417	0.00257681	0.0193164
C24D10.4	WBGene00016055	835.467	0.224387	0.0744996	3.01193	0.00259596	0.0194502
gly-13	WBGene00001638	443.406	-0.439824	0.146047	-3.01152	0.00259942	0.0194573
Y42A5A.1	WBGene00012776	31.0725	-0.957092	0.317814	-3.01148	0.00259977	0.0194573
Y14H12A.1	WBGene00021190	42.9829	-0.879859	0.29218	-3.01136	0.00260082	0.0194573
atx-3	WBGene00006446	1043.2	0.225198	0.0747929	3.01096	0.00260423	0.019473
rrn-3.56	WBGene00004677	63411.2	-1.14181	0.379304	-3.01028	0.00261011	0.0195041
idhb-1	WBGene00007993	1491.16	0.303035	0.10067	3.01017	0.002611	0.0195041
Y105E8B.9	WBGene00013693	179.17	-0.441042	0.146543	-3.00965	0.00261549	0.0195279
[truncated: 13,849 more rows]

## Sheet: N2_5mHS.vs.N2_Ctrl
gene.name	row	baseMean	log2FoldChange	lfcSE	stat	pvalue	padj
hsp-16.11	WBGene00002017	7342.58	7.18836	0.262583	27.3756	5.36136e-165	8.49615e-161
C30E1.9	WBGene00022951	5167.69	3.13147	0.13226	23.6766	6.28289e-124	4.97825e-120
F44E5.5	WBGene00009692	36446.7	9.37154	0.406275	23.067	9.93224e-118	5.24654e-114
F44E5.4	WBGene00009691	40050.9	9.49089	0.431678	21.986	3.91928e-107	1.55272e-103
hsp-16.2	WBGene00002016	1543.62	7.57549	0.378367	20.0215	3.57451e-89	1.13291e-85
unc-23	WBGene00006760	1024.63	2.33658	0.121918	19.1651	7.24695e-82	1.91404e-78
hsp-70	WBGene00002026	4430.11	9.29716	0.490749	18.9448	4.87227e-80	1.10301e-76
hsp-16.41	WBGene00002018	1896.34	7.91492	0.473496	16.7159	1.00342e-62	1.98766e-59
Y43F8B.2	WBGene00012813	1911.3	2.04126	0.147797	13.8112	2.18147e-43	3.84108e-40
ssp-9	WBGene00006038	34.6783	43.0804	3.28339	13.1207	2.50584e-39	3.97101e-36
F45D3.4	WBGene00009724	367.022	1.85941	0.15047	12.3573	4.44902e-35	6.40942e-32
T28C12.4	WBGene00020891	397.84	1.83088	0.153258	11.9464	6.77957e-33	8.95299e-30
K06A4.7	WBGene00010597	217.172	-2.52774	0.221539	-11.4099	3.73133e-30	4.54849e-27
ssp-11	WBGene00006040	40.3066	42.1723	3.75708	11.2248	3.08247e-29	3.48913e-26
prg-2	WBGene00004179	2885.2	-1.04032	0.0951358	-10.9351	7.83182e-28	8.27405e-25
zip-10	WBGene00012101	158.034	2.45144	0.227016	10.7986	3.49676e-27	3.46333e-24
dnj-13	WBGene00001031	5307.86	0.798513	0.0746642	10.6947	1.0774e-26	1.00433e-23
R107.5	WBGene00011300	3763.65	0.766827	0.0760777	10.0795	6.806e-24	5.99192e-21
asp-13	WBGene00017881	1409.2	-2.14114	0.21443	-9.98524	1.76872e-23	1.47521e-20
linc-6	WBGene00219700	100.773	2.31585	0.234306	9.88386	4.89119e-23	3.87553e-20
faah-2	WBGene00015048	1050.94	1.27115	0.130252	9.75918	1.68518e-22	1.27167e-19
C55B7.3	WBGene00016942	332.928	2.20784	0.227735	9.69476	3.17377e-22	2.28612e-19
tre-5	WBGene00006611	108.974	2.58319	0.267557	9.65472	4.6943e-22	3.23437e-19
Y75B8A.28	WBGene00013559	130.613	2.50082	0.267229	9.35834	8.09977e-21	5.34821e-18
pqn-44	WBGene00004131	2770.16	1.12034	0.123683	9.05817	1.32654e-19	8.23805e-17
W09G12.7	WBGene00021121	123.993	2.68896	0.296921	9.05613	1.35161e-19	8.23805e-17
kreg-1	WBGene00018725	138.953	4.39782	0.490501	8.96598	3.07529e-19	1.80497e-16
C06B3.6	WBGene00007365	568.172	1.55929	0.176608	8.8291	1.05523e-18	5.97221e-16
Y70G10A.3	WBGene00013499	163.849	1.23594	0.144419	8.55805	1.14797e-17	6.27304e-15
srh-70	WBGene00005291	53.5835	4.4261	0.520141	8.50943	1.74792e-17	9.23312e-15
numr-2	WBGene00017267	103.84	-19.3639	2.28242	-8.48393	2.17721e-17	1.11298e-14
K07F5.22	WBGene00303023	30.9724	-47.9807	5.69843	-8.41999	3.76526e-17	1.86463e-14
T25D10.1	WBGene00020799	110.915	2.06684	0.247973	8.33496	7.75254e-17	3.72286e-14
F41C3.2	WBGene00018268	180.142	4.85033	0.591659	8.19785	2.44726e-16	1.14064e-13
scp-1	WBGene00004744	1983.83	0.667948	0.0833582	8.01298	1.11964e-15	5.06941e-13
F08G2.5	WBGene00008577	662.323	3.86461	0.487092	7.93404	2.12135e-15	9.33807e-13
srr-6	WBGene00005657	93.6847	3.93921	0.49814	7.90784	2.61898e-15	1.1217e-12
oac-14	WBGene00008602	474.541	2.39452	0.304954	7.85207	4.09223e-15	1.70657e-12
hsp-110	WBGene00016250	17172.5	0.68752	0.0882287	7.79248	6.57076e-15	2.66992e-12
F56A8.8	WBGene00010142	69.0807	-1.89747	0.24905	-7.61884	2.55959e-14	1.01405e-11
T23F11.6	WBGene00011957	33.5971	3.09485	0.409149	7.56413	3.90463e-14	1.50919e-11
cnp-3	WBGene00020725	581.5	0.912322	0.126936	7.18725	6.61104e-13	2.49441e-10
aip-1	WBGene00000097	1342.7	0.918497	0.128478	7.14903	8.73911e-13	3.22067e-10
C50B8.6	WBGene00008228	109.705	1.09822	0.155592	7.0583	1.68556e-12	6.07068e-10
skr-10	WBGene00004816	104.763	-1.76478	0.252476	-6.98987	2.75138e-12	9.68913e-10
MTCE.7	WBGene00014454	4515.45	2.20754	0.316296	6.97933	2.96586e-12	1.02174e-09
R11F4.1	WBGene00020007	383.303	0.994268	0.14488	6.86269	6.75761e-12	2.27846e-09
hsp-16.48	WBGene00002019	2932.46	8.07018	1.19174	6.77177	1.27219e-11	4.20007e-09
sepa-1	WBGene00010808	334.206	-1.79421	0.265344	-6.76183	1.36256e-11	4.40663e-09
ZK1240.8	WBGene00022872	69.7354	8.07122	1.20791	6.68195	2.3578e-11	7.47282e-09
nhr-105	WBGene00003695	213.098	0.980274	0.147491	6.64633	3.00498e-11	9.33723e-09
F19B2.5	WBGene00008944	3179.62	2.04451	0.311364	6.56631	5.15777e-11	1.57183e-08
pho-9	WBGene00022181	148.029	1.1007	0.1682	6.54398	5.99019e-11	1.79107e-08
Y43F11A.6	WBGene00014576	202.05	-0.825298	0.126766	-6.5104	7.49522e-11	2.19957e-08
W03F9.1	WBGene00020999	3252.59	0.778283	0.119761	6.49862	8.10594e-11	2.33554e-08
dsl-2	WBGene00001104	161.139	-1.53646	0.241502	-6.36208	1.99039e-10	5.53363e-08
K09D9.1	WBGene00019564	643.199	2.93477	0.461228	6.36296	1.97902e-10	5.53363e-08
vet-1	WBGene00020261	235.524	-1.39674	0.219816	-6.35414	2.09589e-10	5.72649e-08
Y38H6C.8	WBGene00012621	67.0712	3.32594	0.524652	6.33931	2.30794e-10	6.19898e-08
Y19D10A.16	WBGene00044734	99.1365	23.3588	3.68854	6.3328	2.40757e-10	6.3588e-08
W01D2.3	WBGene00012180	23.8287	7.90404	1.25606	6.29275	3.11896e-10	8.10265e-08
ZK430.5	WBGene00022741	56.1623	-1.99192	0.317947	-6.26495	3.72956e-10	9.53264e-08
F13A7.11	WBGene00008726	183.481	1.75214	0.281373	6.2271	4.75163e-10	1.17655e-07
Y15E3A.5	WBGene00012444	622.134	1.18007	0.189436	6.22937	4.68302e-10	1.17655e-07
hsp-16.1	WBGene00002015	379.548	8.76611	1.40857	6.22339	4.86518e-10	1.18613e-07
vhp-1	WBGene00006923	1150.74	1.14836	0.185036	6.20613	5.43058e-10	1.30392e-07
mef-2	WBGene00003182	203.686	0.877755	0.142051	6.17915	6.4449e-10	1.52436e-07
bath-25	WBGene00020859	11.097	7.67908	1.24324	6.17669	6.54614e-10	1.52554e-07
aptf-4	WBGene00009202	130.425	-1.64798	0.269502	-6.1149	9.66149e-10	2.21892e-07
vet-6	WBGene00006902	292.618	-1.68848	0.281348	-6.00137	1.95663e-09	4.42953e-07
oac-6	WBGene00007833	164.781	1.37992	0.230207	5.99428	2.04385e-09	4.56181e-07
spe-49	WBGene00019667	57.1954	6.42491	1.07528	5.97513	2.29905e-09	5.06016e-07
C34D4.10	WBGene00016402	137.904	-0.904941	0.152349	-5.93992	2.85155e-09	6.1902e-07
sdz-30	WBGene00011432	182.06	-1.67251	0.28338	-5.902	3.59118e-09	7.69046e-07
sdz-26	WBGene00011049	54.3358	-1.66454	0.290132	-5.73719	9.62624e-09	2.03396e-06
R11A5.3	WBGene00011231	954.125	1.3039	0.22776	5.72488	1.03505e-08	2.15821e-06
Y73C8C.8	WBGene00022265	84.2375	-1.43886	0.252112	-5.70722	1.14838e-08	2.36343e-06
K02D10.4	WBGene00019304	117.964	0.942056	0.165525	5.69133	1.2605e-08	2.56091e-06
skr-13	WBGene00004819	68.075	-1.5338	0.269913	-5.68256	1.32691e-08	2.66172e-06
fbxc-28	WBGene00019922	92.3276	-1.42175	0.252657	-5.62722	1.83137e-08	3.62772e-06
R02C2.1	WBGene00019814	41.4488	-1.73708	0.309337	-5.61548	1.96013e-08	3.83484e-06
pes-10	WBGene00003983	72.2806	-1.54677	0.276963	-5.58475	2.34043e-08	4.48562e-06
C13G3.1	WBGene00007553	129.55	0.952501	0.170638	5.582	2.37769e-08	4.48562e-06
cebp-1	WBGene00016997	437.296	1.32823	0.23789	5.58339	2.35871e-08	4.48562e-06
C35E7.3	WBGene00016455	49.7431	-1.44129	0.259413	-5.55596	2.76086e-08	5.14721e-06
epg-2	WBGene00021468	1118.05	-1.25106	0.226549	-5.52224	3.34714e-08	6.16769e-06
skr-8	WBGene00004814	115.608	-1.64651	0.298657	-5.51303	3.527e-08	6.42441e-06
arrd-2	WBGene00013086	94.3794	-1.23403	0.223965	-5.50991	3.59016e-08	6.46515e-06
MTCE.33	WBGene00014472	1322.75	2.28726	0.418867	5.4606	4.74533e-08	8.44936e-06
sams-2	WBGene00013652	33.7894	-2.31949	0.427926	-5.4203	5.94996e-08	1.04766e-05
C05D12.4	WBGene00007341	32.3899	-7.98423	1.47406	-5.41649	6.07815e-08	1.05847e-05
ttc-36	WBGene00009947	175.925	0.878998	0.162566	5.40702	6.40835e-08	1.10384e-05
fipr-22	WBGene00007989	35.2243	3.74802	0.694831	5.39415	6.88483e-08	1.17316e-05
K05F6.4	WBGene00019415	51.4456	-1.80583	0.337752	-5.34661	8.96151e-08	1.51078e-05
K08D8.4	WBGene00010658	339.942	1.25157	0.23476	5.33127	9.75271e-08	1.62685e-05
fbxb-20	WBGene00022559	24.5935	-2.38041	0.449516	-5.29549	1.18696e-07	1.95935e-05
arrd-3	WBGene00006429	31.0727	2.31423	0.438903	5.27277	1.3438e-07	2.19538e-05
skr-9	WBGene00004815	86.9971	-1.57276	0.298847	-5.26275	1.41917e-07	2.29486e-05
C51E3.10	WBGene00008255	79.5872	1.03571	0.197002	5.25735	1.46144e-07	2.33934e-05
Y71A12B.11	WBGene00013508	108.548	-1.55099	0.295257	-5.253	1.49644e-07	2.3714e-05
sdz-28	WBGene00020073	115.313	-1.42989	0.273049	-5.23677	1.63413e-07	2.56397e-05
Y111B2A.25	WBGene00014613	278.293	-0.57597	0.110245	-5.22448	1.74647e-07	2.71337e-05
W02D9.10	WBGene00012216	181.988	0.918185	0.175917	5.21941	1.79498e-07	2.76165e-05
ZK6.8	WBGene00022643	62.4086	1.09974	0.211099	5.20961	1.89241e-07	2.88356e-05
zip-5	WBGene00007932	161.073	1.42802	0.274359	5.20493	1.94066e-07	2.92891e-05
F45D3.3	WBGene00009723	244.698	0.93857	0.180886	5.18875	2.11715e-07	3.16514e-05
ZK899.5	WBGene00014143	27.137	-2.18152	0.422527	-5.16304	2.42975e-07	3.59853e-05
swt-1	WBGene00019300	109.081	1.18716	0.230294	5.15498	2.5366e-07	3.72199e-05
cnc-4	WBGene00000558	109.335	1.53677	0.298236	5.15287	2.56524e-07	3.72948e-05
Y17D7B.2	WBGene00012450	53.1347	4.29014	0.832953	5.15052	2.5977e-07	3.74234e-05
ZK1240.1	WBGene00022866	33.6404	6.40395	1.247	5.1355	2.81396e-07	4.01738e-05
his-41	WBGene00001915	837.176	0.553624	0.108149	5.1191	3.06992e-07	4.34366e-05
arrd-8	WBGene00012467	21.0241	3.73542	0.732983	5.09619	3.46559e-07	4.8601e-05
pes-2.2	WBGene00010158	329.225	-1.37807	0.271138	-5.08255	3.72394e-07	5.15652e-05
B0281.5	WBGene00015112	196.974	-1.07475	0.211497	-5.08163	3.74203e-07	5.15652e-05
ostf-4	WBGene00011557	7.96005	4.72506	0.933504	5.06164	4.15656e-07	5.67837e-05
btb-11	WBGene00019700	52.7102	-1.56641	0.309925	-5.05415	4.32305e-07	5.85533e-05
nhr-17	WBGene00003616	243.295	0.627376	0.124278	5.04818	4.46034e-07	5.99009e-05
btb-10	WBGene00019313	48.3636	-1.56573	0.311526	-5.02601	5.00791e-07	6.66894e-05
Y58A7A.5	WBGene00021979	591.986	1.28944	0.256854	5.02012	5.16388e-07	6.81933e-05
lido-2	WBGene00015587	49.8306	-1.58403	0.318447	-4.97422	6.55094e-07	8.57957e-05
Y39G10AL.1	WBGene00021458	34.7479	-1.83563	0.369165	-4.97238	6.61375e-07	8.59083e-05
F48G7.13	WBGene00018624	17.6174	2.89886	0.58888	4.92267	8.53712e-07	0.00010999
fil-2	WBGene00019668	62.216	5.14953	1.04993	4.90463	9.36051e-07	0.000119626
Y106G6H.9	WBGene00013721	21.1671	-3.66559	0.748812	-4.89521	9.82024e-07	0.000124497
skpo-1	WBGene00009897	6250.97	0.227072	0.0465845	4.87441	1.09136e-06	0.00013726
#N/A	WBGene00304813	100.61	1.32468	0.272308	4.86463	1.1467e-06	0.000143084
fbxb-49	WBGene00019412	19.308	-2.06032	0.424886	-4.84911	1.24018e-06	0.00015354
skr-11	WBGene00004817	64.4452	-1.14831	0.237293	-4.83922	1.30347e-06	0.000160125
Y73C8C.3	WBGene00022262	68.2908	-1.31447	0.27187	-4.83493	1.33193e-06	0.000162362
ZK1290.5	WBGene00022887	184.205	1.26061	0.261082	4.82839	1.37642e-06	0.000166505
fbxb-26	WBGene00019035	30.837	-1.87541	0.389229	-4.81827	1.44811e-06	0.000173851
dsl-1	WBGene00001103	28.0159	-1.75212	0.363989	-4.81367	1.4818e-06	0.000176557
Y46G5A.28	WBGene00012916	58.144	-1.43806	0.299369	-4.80364	1.55807e-06	0.00018426
arrd-1	WBGene00020205	123.674	-1.79013	0.37312	-4.79773	1.60472e-06	0.00018837
R10D12.1	WBGene00011185	69.0094	1.19091	0.24872	4.78816	1.68315e-06	0.000196124
K03A11.1	WBGene00010519	161.835	-0.851949	0.178359	-4.77659	1.78294e-06	0.000206236
asic-2	WBGene00012137	46.6999	1.83106	0.383527	4.77426	1.80366e-06	0.00020712
klp-10	WBGene00002221	986.391	-0.306107	0.0641408	-4.77242	1.82029e-06	0.000207526
T05D4.2	WBGene00011475	98.1995	-1.39829	0.293461	-4.76484	1.89008e-06	0.000213943
drap-1	WBGene00009584	2521.56	0.355642	0.0747316	4.75892	1.94633e-06	0.000218748
skr-14	WBGene00004820	149.673	-0.916531	0.192901	-4.7513	2.02116e-06	0.000225558
F56H11.2	WBGene00010175	20.7224	2.34747	0.495737	4.73532	2.18711e-06	0.000242371
C49A9.9	WBGene00016763	367.937	0.558439	0.118153	4.72639	2.28546e-06	0.000251512
sdz-16	WBGene00009297	26.3178	-1.62932	0.345015	-4.72246	2.33004e-06	0.000254649
hsp-16.49	WBGene00002020	2243.81	6.08679	1.29028	4.71741	2.38863e-06	0.000255761
fbxb-45	WBGene00019705	34.0272	-1.88237	0.398912	-4.71874	2.37306e-06	0.000255761
Y82E9BR.17	WBGene00022349	158.609	-1.43974	0.305042	-4.71979	2.36087e-06	0.000255761
sdz-14	WBGene00008782	52.0113	-1.74787	0.371474	-4.70523	2.53575e-06	0.000269692
skr-12	WBGene00004818	58.23	-1.47941	0.314581	-4.7028	2.56624e-06	0.000271115
tatn-1	WBGene00009628	2675.66	0.767833	0.165001	4.65349	3.26357e-06	0.000342502
gadr-5	WBGene00045058	71.0003	-1.26223	0.271663	-4.64631	3.37923e-06	0.000352307
Y7A9D.1	WBGene00012420	59.9485	-1.70069	0.366232	-4.64375	3.42142e-06	0.000354374
F38B7.3	WBGene00009534	277.552	0.489723	0.105499	4.64199	3.45076e-06	0.000355092
sdz-29	WBGene00020081	32.8913	-2.31112	0.499376	-4.62801	3.692e-06	0.000377465
C08F1.10	WBGene00015613	104.829	-1.73601	0.376167	-4.615	3.93089e-06	0.000399313
sdz-4	WBGene00016309	44.4859	-1.52656	0.331453	-4.60568	4.11121e-06	0.000411002
C53H9.2	WBGene00016907	3935.05	-0.296122	0.0643039	-4.60505	4.12376e-06	0.000411002
nep-14	WBGene00018225	32.186	1.40281	0.304463	4.60748	4.07579e-06	0.000411002
mxl-3	WBGene00003511	414.475	0.650363	0.14224	4.5723	4.82395e-06	0.000477782
B0410.3	WBGene00015172	155.407	-0.681315	0.149093	-4.56973	4.88361e-06	0.000480687
C08F1.6	WBGene00015610	72.4107	-1.61183	0.35294	-4.56687	4.95058e-06	0.000484271
zip-8	WBGene00017755	162.489	-1.35307	0.297005	-4.55571	5.2209e-06	0.00050758
fkb-5	WBGene00001430	481.164	-0.513785	0.112895	-4.55102	5.33877e-06	0.000515875
sdz-33	WBGene00013233	54.841	-1.43057	0.315141	-4.53944	5.64025e-06	0.000541704
srw-71	WBGene00005818	15.1263	5.98181	1.31854	4.5367	5.71423e-06	0.00054502
fbxc-18	WBGene00016307	40.6433	-2.05304	0.452649	-4.53562	5.74357e-06	0.00054502
ZC250.4	WBGene00045305	255.644	0.809081	0.179074	4.51813	6.23888e-06	0.000588498
vet-2	WBGene00016453	602.107	-0.81977	0.182214	-4.49894	6.82927e-06	0.000640375
fbxb-84	WBGene00020544	48.89	-1.65415	0.368831	-4.48485	7.29664e-06	0.000680176
osta-2	WBGene00015942	256.513	0.536064	0.119598	4.48221	7.38725e-06	0.000684595
C06B3.7	WBGene00007366	317.096	2.26693	0.506852	4.47257	7.72867e-06	0.000707955
Y106G6D.2	WBGene00013699	73.7053	-1.32305	0.295747	-4.47361	7.69114e-06	0.000707955
F22B7.9	WBGene00017698	130.541	0.93981	0.210236	4.47027	7.81227e-06	0.0007115
dnj-12	WBGene00001030	6099.67	0.195703	0.0438836	4.45958	8.21203e-06	0.000741598
Y38E10A.22	WBGene00012600	2195.44	0.445171	0.0998378	4.45895	8.23634e-06	0.000741598
btb-8	WBGene00018437	50.5547	-1.54387	0.348048	-4.4358	9.1732e-06	0.000821286
gst-36	WBGene00001784	653.32	0.569095	0.128973	4.4125	1.02183e-05	0.000904631
F18A11.6	WBGene00008933	35.5913	-1.31703	0.298422	-4.4133	1.01807e-05	0.000904631
EEED8.4	WBGene00017135	110.946	-1.2326	0.280033	-4.40162	1.07446e-05	0.000945945
B0303.7	WBGene00015128	405.98	0.395211	0.0899117	4.39554	1.10496e-05	0.000967417
Y45G5AM.5	WBGene00021557	32.5297	-1.93232	0.440688	-4.38479	1.161e-05	0.0010109
his-24	WBGene00001898	1549.46	-1.03804	0.237248	-4.37535	1.21236e-05	0.00104985
fbxb-104	WBGene00021719	31.2317	-1.64774	0.377311	-4.36705	1.25933e-05	0.0010846
Y94H6A.10	WBGene00022382	1668.93	1.09059	0.24984	4.36514	1.27044e-05	0.00108825
fbxc-25	WBGene00019591	21.8126	-2.2287	0.511357	-4.35841	1.31013e-05	0.00111622
EEED8.12	WBGene00017140	90.6322	-1.13428	0.260987	-4.34611	1.38572e-05	0.00117431
fbxb-35	WBGene00017208	24.6266	-1.88912	0.435769	-4.33514	1.45664e-05	0.00122784
xbp-1	WBGene00006959	3581.66	0.244572	0.0565572	4.32432	1.53002e-05	0.00128287
fbxb-119	WBGene00007182	23.7923	-1.74372	0.403758	-4.31873	1.56928e-05	0.00130886
T25E12.6	WBGene00012021	135.581	-0.910768	0.21129	-4.31051	1.62882e-05	0.00135141
lact-4	WBGene00010877	268.32	0.668323	0.155369	4.30153	1.69625e-05	0.00140002
his-35	WBGene00001909	666.892	0.464956	0.108363	4.29074	1.7808e-05	0.00146219
Y73B3A.18	WBGene00022219	92.8496	-0.845948	0.197606	-4.28099	1.86067e-05	0.0015199
K08H2.2	WBGene00010689	28.5399	-1.43703	0.33622	-4.27407	1.91934e-05	0.00155978
sdz-15	WBGene00017752	25.4409	-1.66944	0.391681	-4.26226	2.02374e-05	0.00162793
fbxb-103	WBGene00018746	54.2191	-1.34315	0.315107	-4.26253	2.02124e-05	0.00162793
Y43E12A.2	WBGene00012794	160.891	0.674338	0.158986	4.24149	2.2204e-05	0.00177711
nas-36	WBGene00003552	33.334	1.20674	0.284983	4.23444	2.29123e-05	0.00182458
F40A3.7	WBGene00018222	25.6623	1.55681	0.368315	4.22685	2.36988e-05	0.00187778
nhr-168	WBGene00008221	81.5266	1.07834	0.255402	4.22212	2.42011e-05	0.00190803
sdz-5	WBGene00016578	35.4308	-1.85504	0.440055	-4.21549	2.49239e-05	0.00195529
Y75B8A.39	WBGene00023483	32.1996	2.51162	0.597081	4.2065	2.59359e-05	0.00202466
athp-3	WBGene00013799	81.1862	-0.825641	0.196508	-4.20157	2.65074e-05	0.00204909
bath-31	WBGene00017405	36.9976	-1.55782	0.370714	-4.20221	2.64319e-05	0.00204909
pqm-1	WBGene00004096	388.047	0.56288	0.134315	4.19073	2.78054e-05	0.00213899
R03D7.3	WBGene00014814	178.62	1.35583	0.324416	4.1793	2.92406e-05	0.00223853
ZK899.6	WBGene00014144	41.7177	-1.5013	0.359675	-4.17403	2.99255e-05	0.00227995
Y39E4B.6	WBGene00012717	358.742	0.696618	0.167262	4.16483	3.1159e-05	0.00236257
Y53F4B.7	WBGene00013154	217.313	2.89612	0.696341	4.15906	3.1956e-05	0.00241146
H24K24.2	WBGene00019239	16.7133	-2.04367	0.491814	-4.15538	3.24751e-05	0.00243902
Y44A6C.1	WBGene00012850	145.47	0.792877	0.191045	4.15021	3.32177e-05	0.00248302
C14B1.3	WBGene00007574	420.686	0.456708	0.110203	4.14423	3.40952e-05	0.00253665
F10E7.1	WBGene00017343	16.9661	-2.02013	0.489579	-4.12625	3.68726e-05	0.00273047
cht-1	WBGene00000503	897.345	-1.03955	0.252124	-4.12317	3.73693e-05	0.00275438
F23A7.6	WBGene00009071	57.6098	-0.952935	0.231321	-4.11953	3.79651e-05	0.00278534
Y48C3A.5	WBGene00012989	81.423	0.892169	0.217113	4.10923	3.96979e-05	0.00289905
oac-31	WBGene00018707	34.5	1.71068	0.416932	4.10303	4.07782e-05	0.00296427
fbxb-18	WBGene00019039	20.3122	-2.38643	0.581919	-4.10097	4.11427e-05	0.00297712
fbxb-48	WBGene00018444	20.8698	-1.89733	0.463116	-4.09688	4.18764e-05	0.00301643
cdd-1	WBGene00000391	126.083	0.85293	0.208334	4.09405	4.2391e-05	0.00302599
pqn-53	WBGene00004138	2139.41	-0.280316	0.0684589	-4.09466	4.22787e-05	0.00302599
sgt-1	WBGene00019893	4703.67	0.211986	0.0518045	4.09204	4.27604e-05	0.00303867
atf-7	WBGene00000223	4803.69	0.232702	0.0569453	4.0864	4.38114e-05	0.00309946
nurf-1	WBGene00009180	7425.63	0.354993	0.0870971	4.07582	4.58518e-05	0.0032294
let-756	WBGene00002881	122.886	0.89198	0.219748	4.0591	4.92619e-05	0.00345422
bub-1	WBGene00000275	4928.28	-0.228659	0.0563629	-4.05691	4.97262e-05	0.00347141
gpr-1	WBGene00001688	458.341	-0.371196	0.0915915	-4.05274	5.06217e-05	0.00351843
Y43B11AL.1	WBGene00021542	36.0433	-1.68549	0.416266	-4.04908	5.14188e-05	0.00355822
F53F1.6	WBGene00009984	23.0294	1.33357	0.330229	4.03832	5.38358e-05	0.00370929
fbxb-54	WBGene00019418	40.3223	-1.5152	0.375884	-4.03102	5.55358e-05	0.00380985
Y17D7C.2	WBGene00012456	32.92	5.11567	1.27281	4.01918	5.84005e-05	0.00397785
F56F4.8	WBGene00045498	55.888	-1.25975	0.313462	-4.01883	5.84868e-05	0.00397785
ets-7	WBGene00017601	29.0146	-1.84005	0.458197	-4.01585	5.92319e-05	0.00401132
Y71F9AL.7	WBGene00022112	22.472	-2.35581	0.58772	-4.00839	6.11338e-05	0.0041225
tts-1	WBGene00006650	1697.55	0.678602	0.169422	4.00539	6.19147e-05	0.00415747
sdz-9	WBGene00017253	45.882	-1.47802	0.369911	-3.99562	6.45248e-05	0.00431445
F45C12.17	WBGene00269388	17.0067	-2.40077	0.602783	-3.9828	6.81073e-05	0.00453486
fbxb-63	WBGene00044197	19.6679	-1.67005	0.419767	-3.97851	6.93496e-05	0.00459826
clec-221	WBGene00008916	40.1369	2.17877	0.549111	3.96781	7.25364e-05	0.00478952
T22B2.1	WBGene00020665	128.233	-1.00859	0.2547	-3.9599	7.49797e-05	0.0049303
efk-1	WBGene00001160	2649.73	0.245317	0.0620098	3.95609	7.61857e-05	0.0049889
fbxb-37	WBGene00020537	39.7737	-1.58477	0.401279	-3.94929	7.83848e-05	0.00511179
fbxb-68	WBGene00008611	13.2256	-2.33193	0.591423	-3.94292	8.04971e-05	0.00522802
ets-4	WBGene00017687	405.552	0.619986	0.157295	3.94156	8.09527e-05	0.00523615
fbxb-75	WBGene00019956	44.1604	-1.57026	0.400785	-3.91797	8.92978e-05	0.00575245
F14B6.3	WBGene00008784	99.5123	-1.15983	0.296518	-3.91149	9.17292e-05	0.00588515
T26E3.5	WBGene00012038	21.656	-1.61046	0.412715	-3.90212	9.53538e-05	0.00609303
F48E3.6	WBGene00018606	64.0034	-1.27056	0.326454	-3.892	9.94219e-05	0.00632746
fbxc-31	WBGene00019925	9.85769	-2.64024	0.680937	-3.87736	0.000105597	0.0066936
T15H9.6	WBGene00011791	43.5946	-1.09032	0.281716	-3.87027	0.000108714	0.00686373
T27E9.6	WBGene00012096	25.3336	-1.66504	0.431409	-3.85954	0.0001136	0.00714372
fbxb-24	WBGene00013234	43.849	-1.0841	0.281342	-3.85331	0.000116529	0.00729898
R13H4.5	WBGene00011263	106.555	0.588774	0.154003	3.82312	0.000131771	0.00822118
glh-1	WBGene00001598	10204	-0.213464	0.0559271	-3.81683	0.000135178	0.00840062
F08B12.4	WBGene00008572	874.035	0.318125	0.0834045	3.81424	0.0001366	0.00845587
fbxb-38	WBGene00016337	11.4271	-2.29608	0.602601	-3.81029	0.000138803	0.008536
F15B10.3	WBGene00017481	80.944	-1.0962	0.287717	-3.80999	0.000138972	0.008536
K09F6.15	WBGene00271744	89.5568	0.655904	0.172199	3.809	0.000139532	0.00853731
F43G6.3	WBGene00009656	373.959	-0.394637	0.103796	-3.80203	0.000143514	0.00871368
fbxb-91	WBGene00044692	45.5441	-1.33889	0.35208	-3.80279	0.000143073	0.00871368
C35E7.5	WBGene00016457	1179.49	-0.844543	0.222532	-3.79515	0.000147552	0.00892463
fbxb-40	WBGene00019704	27.2707	-1.7253	0.455078	-3.79122	0.000149907	0.00903262
fbxb-44	WBGene00019416	21.9451	-1.80711	0.476971	-3.78872	0.000151425	0.00908953
skr-15	WBGene00004821	94.4449	-0.807518	0.214113	-3.77146	0.000162296	0.00970528
linc-138	WBGene00219702	14.2033	3.72738	0.989019	3.76877	0.000164057	0.0097737
skr-7	WBGene00004813	297.66	-0.715995	0.190289	-3.76267	0.000168111	0.00997771
Y25C1A.6	WBGene00021293	52.2019	-1.22615	0.32605	-3.76064	0.000169482	0.0100215
cec-8	WBGene00021913	243.083	-1.06353	0.282926	-3.75904	0.000170569	0.0100484
F25H2.12	WBGene00009123	1556.97	0.2419	0.0643745	3.75769	0.000171487	0.010065
rpn-3	WBGene00004460	7696.68	0.160656	0.0428009	3.75358	0.000174328	0.010194
C33G3.4	WBGene00007904	201.431	-0.774594	0.206603	-3.74919	0.000177408	0.0103131
F53B2.8	WBGene00009957	503.948	1.39193	0.371297	3.74882	0.000177666	0.0103131
fbxb-90	WBGene00044694	23.2327	-1.49077	0.397958	-3.74604	0.000179647	0.01039
H04D03.4	WBGene00010365	29.6811	-1.42662	0.381043	-3.744	0.000181114	0.0104368
snpc-3.1	WBGene00015098	262.828	-0.402473	0.107598	-3.74053	0.000183634	0.0105437
F54F12.1	WBGene00010072	51.0458	2.17678	0.582334	3.73804	0.000185463	0.0106102
pkg-2	WBGene00015650	796.478	0.441577	0.118422	3.72885	0.000192354	0.0109649
F59C12.4	WBGene00045272	92.8874	1.06217	0.284972	3.72726	0.000193569	0.0109946
F31F7.1	WBGene00017964	1107.59	0.463676	0.124445	3.72595	0.000194583	0.0110127
Y44A6C.2	WBGene00012851	105.656	-0.885445	0.237991	-3.7205	0.00019883	0.0112119
fbxb-105	WBGene00017251	24.9043	-1.49658	0.402348	-3.71963	0.000199518	0.0112119
W02F12.2	WBGene00020947	39.6974	0.968048	0.260644	3.71406	0.000203957	0.0114208
hrg-7	WBGene00007605	1440.66	-0.432018	0.116354	-3.71298	0.000204835	0.0114297
pdha-1	WBGene00011510	7136.6	0.130149	0.0352165	3.69568	0.000219298	0.0121938
fbxb-13	WBGene00015607	29.3777	-1.51018	0.409247	-3.69015	0.000224123	0.0124184
fbxb-22	WBGene00013230	22.1827	-1.57956	0.428378	-3.6873	0.000226649	0.0125147
fbxc-21	WBGene00019042	18.5229	-1.94493	0.528158	-3.68248	0.000230973	0.0127091
ZK470.2	WBGene00022745	762.419	0.399317	0.108483	3.68093	0.000232388	0.0127427
gadr-2	WBGene00007887	40.742	-1.18318	0.32168	-3.67811	0.000234969	0.0128398
fbxb-17	WBGene00019037	49.4447	-1.25771	0.342475	-3.67242	0.000240267	0.0130543
lect-2	WBGene00019407	123.679	-0.80362	0.218843	-3.67213	0.00024054	0.0130543
oga-1	WBGene00020596	575.291	0.391154	0.106569	3.67042	0.00024215	0.0130968
fbxb-96	WBGene00016886	18.1465	-1.68419	0.459638	-3.66418	0.000248133	0.0133747
ifd-2	WBGene00002058	443.088	0.575712	0.157198	3.66234	0.00024992	0.0134254
Y49A3A.3	WBGene00013026	509.285	0.320254	0.0875763	3.65685	0.000255331	0.0136697
ttr-50	WBGene00010234	1110.81	-0.765056	0.209478	-3.6522	0.000260004	0.0138267
gadr-4	WBGene00021053	39.6857	-1.3874	0.379882	-3.65219	0.000260008	0.0138267
F38B7.2	WBGene00009533	63.3029	1.01604	0.278341	3.65034	0.000261898	0.0138514
W04A8.5	WBGene00012240	60.813	-0.933265	0.255688	-3.65002	0.000262221	0.0138514
nhr-19	WBGene00003618	107.412	0.764449	0.209784	3.64399	0.000268445	0.0141331
tbx-11	WBGene00006547	73.3232	-1.14358	0.31547	-3.625	0.000288966	0.0151631
ham-1	WBGene00001820	142.261	-1.16727	0.322536	-3.61904	0.0002957	0.0153638
C46A5.6	WBGene00016702	891.821	-0.255114	0.0704823	-3.61955	0.000295121	0.0153638
fbxb-43	WBGene00021774	24.7022	-1.74603	0.482429	-3.61924	0.000295465	0.0153638
F35E12.9	WBGene00009433	349.268	0.763017	0.211024	3.61578	0.00029945	0.0155078
F17C11.11	WBGene00008922	1921.32	0.838261	0.23298	3.598	0.000320677	0.016553
fbxb-11	WBGene00018436	18.3529	-1.98838	0.553149	-3.59466	0.000324814	0.0167121
C25F9.11	WBGene00045411	38.8263	2.03333	0.569378	3.57115	0.000355418	0.0182275
sdz-31	WBGene00011704	8.07099	-2.79092	0.78176	-3.57005	0.000356909	0.0182358
fbxb-1	WBGene00012063	8.74375	-3.14754	0.881827	-3.56934	0.00035788	0.0182358
T26H2.10	WBGene00044976	5.60448	-4.65793	1.30659	-3.56496	0.000363914	0.0184838
#N/A	WBGene00306013	23.3275	1.59009	0.44657	3.56068	0.000369893	0.0187275
F26A3.4	WBGene00009142	318.339	0.467368	0.131335	3.55859	0.000372852	0.0188172
cutl-3	WBGene00008978	16.2535	-1.484	0.41744	-3.55501	0.000377965	0.0190146
sdz-18	WBGene00018442	15.0034	-1.68882	0.47788	-3.53399	0.000409344	0.0204633
fbxb-33	WBGene00044314	12.0654	-2.53552	0.717304	-3.53479	0.000408098	0.0204633
ZK593.9	WBGene00014005	22.5759	1.63075	0.461922	3.53035	0.000415007	0.0206163
C39B5.2	WBGene00016520	160.561	-0.843066	0.238781	-3.53071	0.000414446	0.0206163
nekl-2	WBGene00022631	122.424	0.643278	0.182965	3.51585	0.00043834	0.0217074
egrh-1	WBGene00007772	892.677	0.403766	0.114932	3.51309	0.000442923	0.0217982
Y116A8A.10	WBGene00014975	23.9353	1.10795	0.315322	3.51371	0.000441903	0.0217982
F34D6.1	WBGene00018021	28.1746	-1.58765	0.452108	-3.51167	0.000445306	0.0218476
hsp-90	WBGene00000915	64395.5	0.184962	0.0526963	3.50997	0.000448163	0.0219198
rpr-1	WBGene00045238	46.47	4.54841	1.29727	3.50615	0.000454641	0.0221683
nud-2	WBGene00011230	2234.05	0.208289	0.0594449	3.5039	0.000458492	0.0222875
ZC317.1	WBGene00022587	25.8421	2.13548	0.610052	3.50048	0.000464418	0.0225065
C17E4.2	WBGene00007642	55.376	-1.05256	0.301021	-3.49663	0.000471174	0.0227643
C47D12.4	WBGene00008138	37.3064	-1.41792	0.405675	-3.49521	0.00047368	0.0228158
fbxb-98	WBGene00015830	14.4486	-2.35873	0.675167	-3.49355	0.000476636	0.022844
fbxb-41	WBGene00019703	45.0056	-1.2094	0.34621	-3.49327	0.000477148	0.022844
frm-7	WBGene00001493	2057.06	0.486235	0.139234	3.49221	0.000479033	0.0228652
Y47G6A.5	WBGene00021635	246.114	0.517319	0.148741	3.47799	0.000505195	0.0240415
fbxb-82	WBGene00020542	22.4683	-1.60868	0.462814	-3.47586	0.000509215	0.0241603
K09F6.10	WBGene00019593	101.579	1.15419	0.332152	3.47489	0.00051106	0.0241754
fbxb-15	WBGene00022557	38.5222	-1.20968	0.348528	-3.47081	0.000518888	0.0244727
DH11.5	WBGene00008438	113.94	0.634181	0.182857	3.46818	0.000524	0.0246404
fbxb-46	WBGene00019420	18.6397	-1.57794	0.455142	-3.46692	0.00052646	0.0246829
C49G7.10	WBGene00016788	1067.26	1.33835	0.387024	3.45807	0.000544064	0.025433
Y58A7A.4	WBGene00021978	266.346	1.54363	0.446491	3.45725	0.000545721	0.0254354
ugt-44	WBGene00008486	941.279	1.08524	0.314571	3.4499	0.000560796	0.0260614
F45D3.1	WBGene00009721	14.8553	-1.66443	0.483466	-3.44271	0.000575914	0.0266857
fbxb-108	WBGene00017249	14.2924	-1.67251	0.485933	-3.44185	0.000577743	0.0266924
spe-45	WBGene00009217	14.9752	4.44539	1.29266	3.43894	0.000583994	0.0268513
fbxb-47	WBGene00019045	15.8466	-1.78931	0.520348	-3.43867	0.000584572	0.0268513
sri-57	WBGene00005569	10.6645	-2.31031	0.67494	-3.42299	0.000619364	0.0283672
T08G3.4	WBGene00011617	19.7764	4.68651	1.37041	3.41978	0.000626708	0.0286209
Y17G9B.4	WBGene00021201	134.727	-0.509048	0.148953	-3.41751	0.000631971	0.0287783
pgp-7	WBGene00004001	5.19882	4.67987	1.36987	3.41629	0.000634815	0.028825
tbx-43	WBGene00044798	19.328	-1.81209	0.530808	-3.41384	0.000640546	0.0290021
linc-107	WBGene00219655	5.84882	4.44954	1.30401	3.41219	0.000644429	0.0290948
atz-1	WBGene00009212	223.471	-0.764629	0.224164	-3.41102	0.000647194	0.0291366
F55C9.11	WBGene00010107	21.4706	-2.25379	0.661892	-3.40508	0.000661453	0.0296942
F22G12.3	WBGene00009063	5.15028	-3.27427	0.963113	-3.39968	0.000674648	0.0299175
K10G4.3	WBGene00010752	25.8649	1.48073	0.435461	3.40037	0.000672955	0.0299175
T24B8.3	WBGene00011977	768.21	-0.686319	0.201893	-3.39942	0.000675293	0.0299175
cutl-28	WBGene00018256	44.8593	-1.37833	0.405671	-3.39766	0.000679642	0.0299175
K09F6.9	WBGene00019592	121.066	0.647913	0.190444	3.40211	0.000668683	0.0299175
Y43B11AR.3	WBGene00021544	220.816	0.438078	0.12892	3.39805	0.00067867	0.0299175
C17E4.20	WBGene00219313	613.51	-0.465675	0.137014	-3.39873	0.000676983	0.0299175
C05D12.5	WBGene00007342	32.9848	-1.24727	0.367422	-3.39464	0.000687195	0.0301661
fbxb-65	WBGene00008066	8.49274	-3.92035	1.1558	-3.3919	0.000694105	0.0303853
F32H5.3	WBGene00009349	37.4443	-0.950742	0.280432	-3.39027	0.000698226	0.0304815
hmg-11	WBGene00001976	271.04	-0.784741	0.231576	-3.38869	0.000702269	0.0305738
snx-17	WBGene00008927	235.129	-0.491347	0.145159	-3.38489	0.000712064	0.0309153
Y116A8C.19	WBGene00013796	23.2593	-1.32095	0.390811	-3.38001	0.000724833	0.0313837
acs-15	WBGene00019920	31.0055	4.34885	1.2876	3.37748	0.00073152	0.0315869
nhr-6	WBGene00003605	95.0356	0.908424	0.2698	3.36703	0.000759829	0.0327201
C38D9.8	WBGene00008016	20.7658	-1.59423	0.474126	-3.36245	0.000772535	0.0330976
ugt-16	WBGene00013901	62.4997	-0.695019	0.206741	-3.36179	0.00077439	0.0330976
dct-7	WBGene00017488	16.075	2.81984	0.838834	3.36162	0.000774861	0.0330976
cut-4	WBGene00008482	19.0482	-1.23035	0.366163	-3.36013	0.000779069	0.0331879
F25F2.1	WBGene00009115	41.3367	1.48722	0.442954	3.35751	0.000786473	0.0333242
dct-10	WBGene00012618	45.5666	3.72505	1.10929	3.35805	0.00078494	0.0333242
F56D5.5	WBGene00010149	96.3638	-0.611007	0.182354	-3.35067	0.000806169	0.0340676
ccch-1	WBGene00009532	623.407	0.363956	0.108711	3.34793	0.000814184	0.0343148
T26E3.8	WBGene00012041	20.7689	-1.60203	0.478726	-3.34645	0.000818548	0.0344072
lin-12	WBGene00003001	189.394	-0.672951	0.201204	-3.34462	0.000823948	0.0345426
gpr-2	WBGene00001689	692.013	-0.25009	0.0748721	-3.34023	0.000837099	0.0349657
F21D9.5	WBGene00009019	8.11795	-2.55952	0.766374	-3.33978	0.000838453	0.0349657
F22H10.2	WBGene00017726	88.1192	0.700444	0.210365	3.32966	0.000869519	0.036166
ift-43	WBGene00016121	106.824	-0.542285	0.162921	-3.32851	0.000873126	0.036221
ceh-36	WBGene00000457	28.171	-1.40976	0.423796	-3.3265	0.000879427	0.0363807
F55H12.2	WBGene00010133	30.8227	1.19368	0.358911	3.32583	0.000881567	0.0363807
C32B5.6	WBGene00016299	103.039	-1.82181	0.548611	-3.32076	0.000897722	0.0368554
fbxb-42	WBGene00021773	24.2034	-1.45405	0.437857	-3.32084	0.00089748	0.0368554
fbxa-216	WBGene00012953	92.843	-0.704156	0.212196	-3.31843	0.000905252	0.0370685
H40L08.2	WBGene00014793	246.909	0.618859	0.186611	3.31631	0.000912133	0.0372541
F44F1.4	WBGene00009696	53.8952	-1.17342	0.354146	-3.31337	0.000921789	0.0375516
F43G6.5	WBGene00009658	53.2773	-1.02951	0.311051	-3.30977	0.000933733	0.0378436
Y40C5A.4	WBGene00021497	166.637	0.47734	0.144195	3.31038	0.000931703	0.0378436
skr-16	WBGene00004822	159.929	-0.478178	0.144555	-3.30794	0.000939849	0.0379944
saeg-1	WBGene00010012	1086.66	0.37823	0.114716	3.2971	0.000976891	0.0392237
F57G9.3	WBGene00010219	13.0348	-1.74893	0.530314	-3.2979	0.000974101	0.0392237
fbxc-2	WBGene00016648	44.1393	23.6238	7.16552	3.29687	0.000977685	0.0392237
sdz-10	WBGene00017252	17.7281	-1.74962	0.53151	-3.29179	0.000995535	0.039839
C05B5.2	WBGene00007320	35.3123	4.43886	1.35178	3.28372	0.00102447	0.0408937
F53G2.1	WBGene00018766	19.8402	-1.5693	0.478626	-3.27876	0.00104266	0.0415152
F39G3.3	WBGene00018208	971.315	0.415556	0.127066	3.27038	0.00107402	0.0426565
B0303.14	WBGene00015132	105.155	-0.564539	0.172717	-3.26857	0.00108093	0.0427168
C09F9.7	WBGene00045322	25.2205	-4.50748	1.37877	-3.26921	0.00107848	0.0427168
nas-21	WBGene00003540	7.62202	-2.40062	0.73484	-3.26686	0.00108749	0.0428694
F13C5.2	WBGene00017423	646.987	-0.657876	0.202129	-3.25472	0.00113503	0.0446322
R05F9.6	WBGene00019890	4262.17	0.220356	0.0678523	3.24758	0.00116391	0.0456546
slc-25A29	WBGene00008320	80.6689	-0.507745	0.156445	-3.24553	0.00117234	0.0458716
odc-1	WBGene00003844	769.065	0.53199	0.164035	3.24315	0.00118216	0.0461423
gadr-1	WBGene00010240	7.66123	-3.16293	0.977059	-3.23719	0.00120712	0.0469949
Y43B11AL.5	WBGene00235272	16.5411	-1.72784	0.533856	-3.23653	0.00120994	0.0469949
nhr-84	WBGene00003674	150.892	0.555079	0.171638	3.23402	0.00122061	0.0472935
F13H10.5	WBGene00008776	46.0089	-1.03342	0.319669	-3.23277	0.00122596	0.0473849
F32B5.6	WBGene00017979	553.58	0.375713	0.116304	3.23044	0.001236	0.0476565
npr-28	WBGene00018886	91.0564	0.535354	0.165837	3.2282	0.0012457	0.0476828
fbxc-26	WBGene00019043	18.1768	-1.51641	0.469596	-3.22918	0.00124145	0.0476828
fbxb-31	WBGene00019797	13.7714	-1.66203	0.514786	-3.22859	0.00124403	0.0476828
jun-1	WBGene00012005	489.61	0.490263	0.151908	3.22738	0.0012493	0.0477052
unc-86	WBGene00006818	33.5654	-1.3143	0.407483	-3.22543	0.00125786	0.0478015
jmjd-3.2	WBGene00009089	92.5957	-1.19929	0.371792	-3.22569	0.00125668	0.0478015
klf-3	WBGene00003480	213.343	0.520145	0.161446	3.22179	0.00127391	0.0482959
F22E5.1	WBGene00017703	209.136	-0.581759	0.180636	-3.22062	0.00127914	0.0483783
cav-1	WBGene00000301	1456.85	-0.728077	0.226254	-3.21796	0.00129105	0.0486497
fbxb-50	WBGene00019413	14.7661	-1.61876	0.503087	-3.21765	0.00129245	0.0486497
ckr-2	WBGene00021439	34.6182	0.923069	0.287074	3.21544	0.00130246	0.0487947
linc-7	WBGene00219609	696.439	0.458744	0.142649	3.21591	0.00130033	0.0487947
pek-1	WBGene00003970	1181.11	0.390962	0.121789	3.21015	0.00132664	0.0495833
nhr-106	WBGene00003696	40.9823	-0.798747	0.249202	-3.20522	0.00134958	0.0503218
nas-7	WBGene00003526	37.184	-0.922242	0.28801	-3.20212	0.00136421	0.0507479
hnd-1	WBGene00001981	42.0222	-1.00462	0.314409	-3.19526	0.00139706	0.0518482
npp-12	WBGene00003798	7942.25	0.225128	0.0705839	3.18951	0.00142515	0.0527673
pes-2.1	WBGene00003977	287.948	-1.4786	0.46388	-3.18746	0.00143531	0.0530194
zeel-1	WBGene00021463	47.5934	-1.4727	0.462331	-3.18538	0.00144562	0.053276
sgnh-1	WBGene00020354	29.5734	-1.16241	0.365276	-3.18229	0.00146117	0.0537242
R08E5.1	WBGene00019961	25.0881	-0.996188	0.313375	-3.1789	0.00147833	0.0542293
F39F10.4	WBGene00018204	25.9601	-1.24313	0.391386	-3.17623	0.00149201	0.0546047
T10C6.15	WBGene00050899	8.92924	1.89683	0.597496	3.17464	0.00150023	0.054779
nas-3	WBGene00003522	147.203	0.615482	0.194175	3.16972	0.00152585	0.0555866
cnnm-5	WBGene00011260	12.9655	2.16317	0.68274	3.16837	0.00153297	0.0556165
C32D5.12	WBGene00016319	40.8158	-1.17915	0.372178	-3.16823	0.00153369	0.0556165
M106.3	WBGene00010911	2252.08	0.20295	0.0641673	3.16282	0.00156248	0.056531
Y106G6D.1	WBGene00013698	74.5954	-0.858688	0.271605	-3.16153	0.00156943	0.0566531
sdz-11	WBGene00017408	14.1455	-1.70557	0.540043	-3.15822	0.00158738	0.0571709
M153.2	WBGene00010925	55.2539	-0.742238	0.235256	-3.15502	0.00160488	0.0576701
fkh-5	WBGene00001437	21.0541	-1.23767	0.39298	-3.14943	0.00163587	0.0581597
taf-11.1	WBGene00006393	244.397	-0.387555	0.122974	-3.15151	0.00162427	0.0581597
W04A8.3	WBGene00012238	18.3591	-1.36876	0.434512	-3.15011	0.00163209	0.0581597
nspe-5	WBGene00012594	8.24606	2.30763	0.732752	3.14926	0.00163685	0.0581597
B0222.1	WBGene00015053	6.81098	-2.21545	0.703359	-3.14981	0.00163374	0.0581597
H04D03.3	WBGene00010364	790.324	-0.412764	0.131416	-3.1409	0.00168428	0.0597108
msp-3	WBGene00003424	90.861	4.1915	1.33482	3.14012	0.00168877	0.0597365
Y71G12B.33	WBGene00044358	37.2334	4.14911	1.32175	3.1391	0.0016947	0.0598127
Y41D4B.14	WBGene00021516	25.1902	-1.17343	0.374125	-3.13646	0.00170998	0.060218
ZK662.5	WBGene00014040	10.0039	-1.74614	0.557885	-3.12993	0.0017485	0.0614377
bgnt-1.2	WBGene00017723	20.7247	1.33579	0.427159	3.12715	0.0017651	0.0618841
sri-39	WBGene00005551	20.6864	4.19399	1.34204	3.12509	0.00177753	0.062182
C15F1.8	WBGene00015797	125.849	-0.47135	0.151251	-3.11635	0.00183103	0.0639126
sri-36	WBGene00005548	21.2219	3.4543	1.11197	3.10647	0.00189334	0.0653677
F13B6.3	WBGene00017418	102.269	-0.516319	0.16617	-3.10716	0.00188892	0.0653677
M01H9.3	WBGene00019719	2796.35	0.189584	0.0609901	3.10844	0.00188075	0.0653677
fbxb-81	WBGene00020541	15.7689	-1.61917	0.520924	-3.10826	0.0018819	0.0653677
F55C9.14	WBGene00077663	9.38598	-1.96745	0.633259	-3.10686	0.00189086	0.0653677
F40F11.4	WBGene00009589	27.0269	3.12004	1.00549	3.10301	0.00191561	0.0659926
ttm-1	WBGene00012712	429.591	0.356485	0.115209	3.09424	0.00197318	0.0678285
F55C12.19	WBGene00271817	14.0057	1.62351	0.525871	3.08728	0.00201996	0.0692863
Y106G6H.10	WBGene00013722	17.4379	-1.67854	0.544318	-3.08374	0.00204414	0.0699645
K02E11.15	WBGene00304182	101.652	1.27195	0.412609	3.08269	0.00205138	0.0700609
R10E8.3	WBGene00011209	9.27605	1.50632	0.489563	3.07688	0.00209181	0.0712881
fbxa-103	WBGene00008612	8.19839	-2.93301	0.954221	-3.07372	0.00211408	0.0718922
fbxb-83	WBGene00020543	33.7643	-1.17792	0.383783	-3.06924	0.00214605	0.0727385
oac-50	WBGene00020864	7.4888	4.22982	1.37826	3.06895	0.00214814	0.0727385
ntl-9	WBGene00016139	1925.51	0.231951	0.0756449	3.06631	0.00216719	0.073227
mls-2	WBGene00003377	25.8328	-1.54938	0.505983	-3.06212	0.00219778	0.0741026
Y6D1A.2	WBGene00012396	23.1849	-1.21877	0.398177	-3.06088	0.00220689	0.0742517
M03D4.4	WBGene00019751	63.4155	-0.997459	0.327687	-3.04394	0.00233504	0.0782314
Y38F2AL.6	WBGene00021418	46.2373	-0.775397	0.254707	-3.04427	0.00233247	0.0782314
fbxa-104	WBGene00011542	5.86908	-2.61323	0.859852	-3.03916	0.00237237	0.0791471
Y17G7B.17	WBGene00012468	1037.2	0.239609	0.0788256	3.03973	0.00236786	0.0791471
gcy-17	WBGene00001542	48.3581	3.83222	1.26136	3.03817	0.0023802	0.0792417
F10G7.9	WBGene00017372	1970.52	0.216426	0.0713329	3.03403	0.00241314	0.0801295
math-35	WBGene00020075	66.6269	-0.674006	0.222184	-3.03355	0.00241698	0.0801295
C01B4.7	WBGene00015271	79.9267	8.05545	2.65869	3.02986	0.0024467	0.0809455
fbxb-2	WBGene00012065	13.7155	-1.84163	0.608096	-3.02852	0.00245755	0.0811349
lap-2	WBGene00002250	6875.93	0.243997	0.0805971	3.02737	0.00246691	0.0812746
gpc-1	WBGene00001681	8.59579	-1.82724	0.604081	-3.02483	0.00248771	0.0816207
K09F6.7	WBGene00019590	35.3596	0.874963	0.289254	3.0249	0.00248718	0.0816207
M05D6.10	WBGene00044168	13.3324	4.02117	1.33033	3.02269	0.00250536	0.08203
C10G8.3	WBGene00015682	7.28283	4.06371	1.34642	3.01817	0.00254305	0.0830922
mdl-1	WBGene00003163	400.614	0.545592	0.180889	3.01617	0.00255986	0.0834692
gly-8	WBGene00001633	509.498	0.611765	0.202974	3.01401	0.00257818	0.0838259
Y82E9BL.6	WBGene00022323	5.41095	-2.84779	0.944968	-3.01364	0.00258137	0.0838259
T18D3.6	WBGene00011823	199.999	0.478702	0.159104	3.00873	0.00262346	0.0850184
C30G12.10	WBGene00284859	6.04185	2.60068	0.864651	3.00779	0.00263158	0.0851076
cyp-13A2	WBGene00011676	102.137	-0.515359	0.171584	-3.00354	0.00266854	0.0861271
syd-9	WBGene00044068	209.8	-0.733977	0.244887	-2.99721	0.00272462	0.0877581
W05G11.2	WBGene00021040	31.9658	-0.88576	0.295832	-2.99413	0.00275227	0.0884691
mage-1	WBGene00018230	923.36	0.193981	0.0648154	2.99283	0.00276403	0.0886331
rfip-1	WBGene00018869	475.431	0.330287	0.110386	2.9921	0.00277065	0.0886331
T21G5.1	WBGene00020659	24.328	3.44048	1.15	2.99171	0.00277415	0.0886331
gst-1	WBGene00001749	2755.4	0.247767	0.0828751	2.98965	0.00279297	0.0889109
C50F7.5	WBGene00016845	158.942	1.70698	0.570985	2.98953	0.00279407	0.0889109
unc-120	WBGene00006844	204.174	-0.437618	0.146437	-2.98843	0.00280412	0.0890519
sodh-1	WBGene00010790	429.851	0.64115	0.214769	2.9853	0.002833	0.0897889
end-1	WBGene00001310	10.1175	-1.78334	0.597993	-2.9822	0.00286182	0.0903412
nas-25	WBGene00003544	11.6241	1.6291	0.546214	2.98253	0.0028588	0.0903412
fbxb-95	WBGene00016880	19.8325	-1.40979	0.473288	-2.97871	0.00289463	0.0911952
F19F10.1	WBGene00017598	28.2298	-1.13993	0.382931	-2.97685	0.00291227	0.0915689
hil-3	WBGene00001854	584.634	-0.783097	0.264186	-2.96419	0.00303483	0.094671
T19H5.4	WBGene00011849	716.559	0.29307	0.0988118	2.96594	0.00301759	0.094671
snpc-3.3	WBGene00021662	50.8315	-0.827684	0.279196	-2.96453	0.0030315	0.094671
K05F6.15	WBGene00269419	14.4704	-1.74417	0.588281	-2.96486	0.00302822	0.094671
pqbp-1.2	WBGene00020295	126.632	-0.444274	0.149917	-2.96347	0.00304192	0.0947059
R04A9.7	WBGene00044281	48.2308	-0.935729	0.315903	-2.96208	0.00305567	0.0949473
F36H1.3	WBGene00009492	17.1906	4.1743	1.41065	2.95913	0.00308505	0.0956729
F57H12.5	WBGene00019020	30.0414	1.59786	0.540544	2.95602	0.00311637	0.0964551
K09F6.6	WBGene00019589	66.6581	0.592667	0.200552	2.95518	0.0031249	0.0965307
F18C5.10	WBGene00017563	487.721	0.308394	0.104449	2.95256	0.00315147	0.0971621
mboa-4	WBGene00007446	19.0779	-1.9847	0.672437	-2.9515	0.00316231	0.0973072
C24H12.9	WBGene00016078	3.79745	-3.94029	1.33808	-2.94473	0.00323236	0.0992698
W05H9.3	WBGene00021050	3324.4	0.519716	0.176574	2.94333	0.003247	0.0995266
T27F6.8	WBGene00012107	115.467	0.609443	0.207313	2.93972	0.00328508	0.100113
kin-34	WBGene00019815	24.7297	-1.02719	0.349286	-2.94083	0.00327336	0.100113
fbxc-51	WBGene00021576	249.266	-0.93884	0.319352	-2.93983	0.00328394	0.100113
daf-12	WBGene00000908	317.47	0.579468	0.197381	2.93578	0.00332708	0.101198
fbxb-52	WBGene00019417	8.83427	-2.09421	0.713484	-2.93518	0.0033335	0.101199
Y17D7C.4	WBGene00050903	13.5666	-3.93994	1.34525	-2.92879	0.00340289	0.103108
C05E4.15	WBGene00206359	7.98707	-2.59318	0.885625	-2.92808	0.00341063	0.103146
bli-1	WBGene00000251	56.7272	1.23654	0.42299	2.92332	0.00346322	0.104536
acs-5	WBGene00013575	1104.94	-0.265118	0.0907421	-2.92167	0.00348162	0.104693
F40G9.12	WBGene00018247	4.1059	-3.96047	1.35539	-2.92201	0.00347777	0.104693
T24C4.4	WBGene00020760	52.3067	1.28832	0.441063	2.92095	0.00348971	0.104738
B0310.2	WBGene00015138	127.739	-0.582709	0.199681	-2.9182	0.00352064	0.105373
fbxb-111	WBGene00017254	10.2648	-2.15274	0.737774	-2.91788	0.00352418	0.105373
Y41E3.1	WBGene00012762	2623.33	0.179301	0.0614937	2.91576	0.00354823	0.105796
R03H10.6	WBGene00019858	134.784	1.02234	0.350661	2.91546	0.00355169	0.105796
ceh-13	WBGene00000437	94.0381	-0.690486	0.237267	-2.91017	0.00361235	0.107401
pept-1	WBGene00003877	1660.62	-0.295251	0.101559	-2.90718	0.00364702	0.107877
C03E10.3	WBGene00007281	15.8224	1.07716	0.370448	2.90773	0.00364068	0.107877
Y47D3A.1	WBGene00012922	62.4269	-0.839216	0.288743	-2.90645	0.00365558	0.107877
otub-4	WBGene00015249	1412.59	0.201875	0.0694463	2.90693	0.00364997	0.107877
ins-37	WBGene00002120	17.222	3.42348	1.17849	2.90497	0.00367288	0.108186
fbxb-66	WBGene00044066	37.1533	-1.50393	0.518037	-2.90314	0.00369446	0.108419
ZC239.20	WBGene00044371	17.9061	-1.08862	0.374935	-2.90349	0.00369033	0.108419
del-8	WBGene00007518	7.15387	-3.31941	1.14404	-2.90149	0.00371397	0.10879
gcy-21	WBGene00001546	34.8267	-0.869121	0.299644	-2.90052	0.00372547	0.108925
C27B7.6	WBGene00007763	18.1866	3.48669	1.20324	2.89776	0.0037584	0.109484
C33D9.3	WBGene00007898	124.703	0.463634	0.159992	2.89786	0.00375719	0.109484
ghi-1	WBGene00013923	52.7448	0.759367	0.262257	2.89551	0.00378549	0.110071
C40A11.7	WBGene00016550	8.10229	-2.88431	0.996549	-2.89429	0.00380011	0.110294
#N/A	WBGene00305993	28.6885	-1.11636	0.386359	-2.88943	0.0038594	0.11181
fut-8	WBGene00001508	156.666	-0.440315	0.152525	-2.88684	0.00389129	0.112422
F29B9.5	WBGene00017921	18.4462	1.1786	0.408306	2.88657	0.00389471	0.112422
fbxb-74	WBGene00019952	23.5167	-1.10505	0.383015	-2.88515	0.00391233	0.112725
srr-10	WBGene00005661	4.34288	4.38011	1.5196	2.88241	0.00394643	0.113501
slc-28.2	WBGene00017868	16.9746	1.22206	0.424173	2.88104	0.00396367	0.11379
F44E2.3	WBGene00018417	726.704	-0.242333	0.0841907	-2.87838	0.00399718	0.114545
ttll-12	WBGene00008405	2642.85	0.221197	0.0769017	2.87637	0.00402284	0.115072
ceh-20	WBGene00000443	283.495	-0.593646	0.206688	-2.87218	0.00407647	0.115978
col-162	WBGene00000735	19.9781	1.81988	0.633392	2.87323	0.00406293	0.115978
fbxb-5	WBGene00018445	7.71445	-3.2484	1.13088	-2.87246	0.00407287	0.115978
bag-1	WBGene00000236	1077.06	0.246159	0.0857289	2.87136	0.00408704	0.116071
T28H11.7	WBGene00020905	50.367	-3.80973	1.32772	-2.86938	0.00411272	0.116591
F23A7.3	WBGene00009068	29.4252	-0.919195	0.32081	-2.86523	0.00416707	0.117711
cpt-4	WBGene00019644	302.869	0.841061	0.293528	2.86535	0.00416551	0.117711
mpk-2	WBGene00003402	92.3102	0.499199	0.174375	2.86279	0.00419923	0.118408
gipc-1	WBGene00016440	129.929	1.88319	0.65863	2.85925	0.00424639	0.119525
F43C11.8	WBGene00018385	19.8704	1.77598	0.621557	2.85731	0.00427245	0.120045
dct-8	WBGene00044472	6.85603	3.99396	1.39961	2.85363	0.00432226	0.12123
Y73B6A.6	WBGene00044503	26.7951	1.5138	0.531038	2.85065	0.00436303	0.122157
tag-260	WBGene00010867	319.137	0.344228	0.12086	2.84815	0.00439736	0.122901
gst-15	WBGene00001763	34.6319	0.80918	0.284174	2.84748	0.00440668	0.122945
F58B3.4	WBGene00010231	2192.73	-0.176813	0.0621791	-2.8436	0.00446067	0.124014
C01G6.10	WBGene00014663	80.6133	-1.00076	0.351879	-2.84403	0.00445465	0.124014
T11B7.1	WBGene00011706	138.763	-0.773693	0.272239	-2.84196	0.00448366	0.124435
F36H5.8	WBGene00018106	7.76095	-4.54216	1.59977	-2.83926	0.00452181	0.125275
D1053.4	WBGene00008369	27.4506	-0.881134	0.310566	-2.83719	0.00455129	0.125871
C24H12.1	WBGene00016071	37.045	-1.13994	0.401924	-2.83621	0.00456525	0.126038
eya-1	WBGene00001377	100.452	-0.790976	0.279617	-2.82879	0.00467248	0.128774
F56B3.2	WBGene00018928	185.604	-0.314011	0.111045	-2.82779	0.00468708	0.128952
C09B9.4	WBGene00015629	29.6953	-3.78215	1.33866	-2.82534	0.00472307	0.129717
gst-20	WBGene00001768	206.203	0.360479	0.127714	2.82256	0.00476425	0.130171
K03B4.2	WBGene00019354	1746.5	0.157677	0.0558632	2.82256	0.00476424	0.130171
T04B8.2	WBGene00020204	11.197	-1.77832	0.629825	-2.82352	0.00474988	0.130171
M05D6.1	WBGene00010874	38.518	3.3156	1.17542	2.82078	0.0047907	0.130668
F33H2.6	WBGene00009369	631.348	-0.382552	0.135737	-2.81833	0.00482739	0.131443
F59B10.4	WBGene00010320	52.0407	0.890435	0.316194	2.8161	0.00486103	0.132132
col-149	WBGene00000722	122.539	0.820532	0.291502	2.81484	0.00488008	0.132196
R03H10.11	WBGene00271824	16.0751	-1.32625	0.471146	-2.81494	0.0048787	0.132196
pqn-89	WBGene00004169	268.632	0.397778	0.141443	2.81228	0.00491909	0.133025
F26F4.8	WBGene00005011	222.912	-0.371209	0.132094	-2.81018	0.00495135	0.133216
R02C2.6	WBGene00019817	20.9326	-1.19614	0.425582	-2.8106	0.00494486	0.133216
arrd-23	WBGene00020323	12.2546	-1.56685	0.557436	-2.81081	0.00494166	0.133216
fbxb-57	WBGene00010101	12.3552	-1.28651	0.458407	-2.80647	0.00500874	0.134304
F31E3.12	WBGene00219317	11.5556	-1.99728	0.711577	-2.80683	0.00500314	0.134304
F26G1.2	WBGene00017838	109.033	0.894968	0.319041	2.80518	0.00502879	0.134477
Y41D4A.3	WBGene00021505	48.653	-1.12441	0.400866	-2.80497	0.00503218	0.134477
C26D10.6	WBGene00007746	135.346	-0.382056	0.136428	-2.80043	0.00510343	0.13613
F57A8.9	WBGene00197215	18.8082	3.81024	1.36083	2.79994	0.0051112	0.13613
#N/A	WBGene00306078	356.532	0.353283	0.126313	2.79688	0.00515982	0.137194
F37B12.3	WBGene00009505	1417.25	0.167996	0.0601156	2.79455	0.00519725	0.137727
dot-1.4	WBGene00010120	45.6332	-0.858913	0.307334	-2.79472	0.00519448	0.137727
T27E4.7	WBGene00020865	83.9231	0.504897	0.180852	2.79177	0.00524208	0.138683
sulp-4	WBGene00010788	56.8807	0.701346	0.251284	2.79106	0.00525365	0.138758
C01G12.3	WBGene00007244	48.5033	-0.944356	0.33905	-2.7853	0.00534781	0.140971
txdc-12.1	WBGene00013263	296.812	-0.511422	0.183644	-2.78485	0.00535524	0.140971
fbxb-116	WBGene00012066	6.07492	-2.08259	0.748234	-2.78333	0.00538033	0.141396
daf-16	WBGene00000912	3247.76	0.308082	0.110726	2.78238	0.0053962	0.141579
twk-47	WBGene00018002	4.84983	-3.71623	1.33789	-2.77768	0.00547483	0.143404
R12G8.1	WBGene00011254	7.94969	1.9636	0.707296	2.77621	0.00549974	0.143819
F43D9.1	WBGene00009653	168.347	-0.830819	0.29978	-2.77143	0.00558098	0.145703
K02B12.2	WBGene00010495	98.9691	-0.741404	0.2677	-2.76954	0.00561362	0.146314
ppm-2	WBGene00011953	1976.56	0.163313	0.0590121	2.76744	0.00564981	0.147016
C50F2.1	WBGene00016835	4.36221	-3.94076	1.42495	-2.76555	0.00568276	0.147631
F38C2.7	WBGene00009539	24.0253	-1.13716	0.411769	-2.76165	0.00575105	0.14916
sdz-13	WBGene00008755	8.54063	-1.63738	0.594544	-2.75401	0.00588691	0.152435
Y37E11AM.2	WBGene00021366	589.05	0.31831	0.115939	2.74549	0.006042	0.156195
C14B4.2	WBGene00007583	334.012	0.431779	0.157354	2.74401	0.00606946	0.156649
C32C4.3	WBGene00007863	6.41048	-3.80574	1.3876	-2.74269	0.00609385	0.157023
R10E9.2	WBGene00011214	153.149	1.88164	0.68646	2.74108	0.00612371	0.157536
fbxc-29	WBGene00019923	26.6139	-1.1912	0.434683	-2.74039	0.00613663	0.157613
fbxb-118	WBGene00021054	11.0624	-1.73783	0.63443	-2.7392	0.00615882	0.157927
Y46G5A.6	WBGene00012898	66.6986	-0.954046	0.348403	-2.73834	0.00617498	0.158085
Y47H10A.5	WBGene00012961	515.74	0.969818	0.354292	2.73734	0.00619386	0.158313
C50B8.4	WBGene00008226	19.9479	1.00064	0.365733	2.73598	0.00621941	0.15871
C32D5.1	WBGene00016310	25.2203	-0.863029	0.315759	-2.73319	0.00627246	0.159807
F07E5.13	WBGene00304173	18.4867	-1.60566	0.588412	-2.7288	0.00635647	0.161687
sdz-12	WBGene00017406	11.6626	-1.37691	0.505388	-2.72447	0.00644056	0.163563
F49B2.7	WBGene00086555	10.8507	-1.88727	0.693631	-2.72086	0.0065112	0.165093
fbxb-94	WBGene00013410	10.1058	-2.8631	1.05324	-2.71837	0.00656041	0.166075
R11.4	WBGene00011229	5.63968	-2.72563	1.00296	-2.71759	0.00657595	0.166203
tpra-1	WBGene00008366	149.735	0.701801	0.258435	2.71558	0.00661604	0.16695
nhr-173	WBGene00016975	85.5395	0.54223	0.199734	2.71476	0.00663244	0.167097
R10D12.13	WBGene00011194	505.753	-0.291323	0.107338	-2.71406	0.00664641	0.167184
F53A9.1	WBGene00018724	43.0881	0.767955	0.283073	2.71292	0.00666937	0.167495
fbxc-22	WBGene00019041	21.2924	-1.24318	0.458576	-2.71095	0.0067091	0.168226
oat-1	WBGene00003837	147.035	-0.471358	0.173913	-2.71031	0.00672213	0.168287
mks-5	WBGene00007490	27.783	-2.14274	0.792153	-2.70496	0.0068312	0.170748
fbxc-36	WBGene00019918	120.718	-0.691547	0.255717	-2.70435	0.00684389	0.170795
tag-344	WBGene00015230	38.6986	2.25508	0.834288	2.703	0.00687162	0.171218
ubc-15	WBGene00006710	1205.73	0.240513	0.089165	2.69739	0.00698858	0.173601
cpna-5	WBGene00007044	102.311	-0.607043	0.225051	-2.69736	0.00698919	0.173601
eva-1	WBGene00009304	99.862	-0.714606	0.265466	-2.6919	0.0071047	0.176194
set-31	WBGene00007615	711.737	-0.237913	0.0884362	-2.69023	0.00714034	0.176801
F45D11.5	WBGene00018452	11.9961	-1.57204	0.584739	-2.68845	0.00717854	0.17747
sptf-1	WBGene00009743	41.0984	-1.06276	0.395589	-2.68652	0.00722013	0.177552
Y45F10C.1	WBGene00012877	13.3003	-3.9144	1.45722	-2.68621	0.00722667	0.177552
cst-1	WBGene00017472	380.478	-0.382183	0.142256	-2.68659	0.00721847	0.177552
T23C6.4	WBGene00020726	272.227	-0.503924	0.187544	-2.68697	0.0072104	0.177552
elo-5	WBGene00001243	2283.28	-0.300195	0.111881	-2.68317	0.00729285	0.178706
fbxb-85	WBGene00011267	29.0948	-1.13272	0.422196	-2.68293	0.00729795	0.178706
bath-36	WBGene00013569	192.086	0.415039	0.154721	2.6825	0.00730746	0.178706
lgc-55	WBGene00013746	22.9619	-0.90871	0.338912	-2.68125	0.00733468	0.179095
str-96	WBGene00006153	8.27899	3.78559	1.41293	2.67925	0.00737867	0.179892
Y82E9BL.5	WBGene00022322	6.0642	-2.62428	0.98017	-2.67737	0.00742022	0.180627
F58H1.5	WBGene00010288	85.6777	-0.684353	0.255659	-2.67682	0.00743242	0.180647
snf-8	WBGene00004907	8.63109	3.56065	1.33065	2.67586	0.00745373	0.180887
C14A4.13	WBGene00007563	14.4992	3.78667	1.41862	2.66926	0.00760182	0.184199
tsp-1	WBGene00006627	23.9891	1.19729	0.448777	2.6679	0.00763269	0.184664
unc-85	WBGene00006817	1365.19	-0.248538	0.0932756	-2.66455	0.00770908	0.186228
nhr-67	WBGene00003657	22.7486	-1.44509	0.542742	-2.66257	0.00775472	0.187046
dct-18	WBGene00010266	2281.75	-0.264465	0.0994326	-2.65974	0.00782002	0.188334
nxf-1	WBGene00003834	2697.62	0.248599	0.0935865	2.65635	0.00789909	0.18995
scrt-1	WBGene00016948	4.15875	-3.50017	1.31823	-2.6552	0.00792617	0.190312
twk-32	WBGene00006684	18.2013	1.08024	0.407222	2.65269	0.00798523	0.19144
Y51H7C.41	WBGene00302984	142.223	0.552375	0.208688	2.64689	0.00812355	0.194462
fbxb-3	WBGene00009546	28.4183	-1.06325	0.401934	-2.64534	0.00816079	0.195059
F19B2.12	WBGene00194812	61.0292	-0.554593	0.209692	-2.6448	0.00817401	0.195081
T01D3.6	WBGene00011330	545.546	-0.455634	0.172332	-2.64394	0.00819481	0.195283
ttm-5	WBGene00013197	151.809	0.540078	0.204354	2.64285	0.0082212	0.195618
F53C11.4	WBGene00009974	2106.78	0.235196	0.089045	2.64131	0.0082585	0.195917
Y75B8A.19	WBGene00013554	231.075	-0.403388	0.152718	-2.6414	0.00825639	0.195917
Y113G7B.15	WBGene00013764	6.55006	2.6192	0.991881	2.64063	0.00827512	0.196018
tomm-40	WBGene00007686	3208.92	0.161841	0.0613512	2.63795	0.00834096	0.196988
F25G6.1	WBGene00017796	177.855	0.36729	0.139214	2.63831	0.00833196	0.196988
BE10.3	WBGene00007211	40.7306	-0.794846	0.301469	-2.63658	0.00837477	0.197492
F23D12.4	WBGene00009088	20.1078	-1.05805	0.402297	-2.63003	0.00853772	0.201036
T14G8.2	WBGene00011770	69.5874	-0.927733	0.352896	-2.62891	0.00856585	0.201101
arrd-4	WBGene00014159	49.7558	-0.902348	0.343178	-2.62939	0.00855383	0.201101
ZC262.7	WBGene00043948	63.3698	1.049	0.399503	2.62576	0.00864561	0.202673
F35E12.2	WBGene00009426	18.3542	-1.62121	0.617998	-2.62333	0.00870756	0.203824
Y45G12C.1	WBGene00021565	30.8496	-0.793221	0.302606	-2.6213	0.00875951	0.204737
Y54F10AR.2	WBGene00021855	633.877	0.180963	0.0690489	2.62079	0.00877258	0.204741
sphk-1	WBGene00007918	514.257	-0.252062	0.0963021	-2.61741	0.0088601	0.206479
dsl-7	WBGene00001109	11.3434	-1.81096	0.692664	-2.61448	0.00893636	0.207951
C11G10.1	WBGene00007525	58.8006	0.707737	0.270762	2.61387	0.00895231	0.208016
lsy-27	WBGene00009834	473.067	-0.290612	0.111209	-2.6132	0.00896996	0.208122
F35D2.3	WBGene00018041	82.1612	-0.782588	0.299615	-2.61198	0.00900198	0.208559
ref-2	WBGene00004335	32.6685	-1.00563	0.385102	-2.61133	0.00901908	0.20865
F15E6.3	WBGene00017484	330.839	0.646348	0.247645	2.60997	0.00905494	0.209174
F02D8.4	WBGene00008521	283.595	-0.344675	0.132117	-2.60887	0.00908421	0.209545
T11G6.4	WBGene00011719	179.825	-0.306502	0.117526	-2.60795	0.00910867	0.209804
F35C11.2	WBGene00009401	13.3285	2.05307	0.787405	2.60739	0.00912362	0.209843
F40G9.15	WBGene00077531	6.57676	-3.89474	1.49465	-2.60578	0.00916645	0.210523
hlh-14	WBGene00001958	30.1319	-1.12606	0.432667	-2.6026	0.00925204	0.212181
bre-3	WBGene00000268	1743.56	0.156343	0.0600872	2.60194	0.0092698	0.212281
ZC190.4	WBGene00022538	211.182	0.5708	0.219728	2.59776	0.00938337	0.214263
ZK250.15	WBGene00235355	3.95776	-3.90327	1.50248	-2.59789	0.00937978	0.214263
#N/A	WBGene00304908	55.4725	0.631856	0.243307	2.59695	0.00940566	0.214462
F17C8.7	WBGene00008912	36.5855	1.78774	0.688987	2.59473	0.00946651	0.21554
ekl-5	WBGene00012512	608.822	0.209615	0.0809183	2.59045	0.00958495	0.217923
hsp-6	WBGene00002010	18312.2	0.28305	0.109349	2.58851	0.0096392	0.218843
F59G1.8	WBGene00019129	398.982	-0.221636	0.0857033	-2.58608	0.00970739	0.219762
tyr-6	WBGene00022231	305.54	-0.33274	0.128656	-2.58628	0.0097019	0.219762
cpn-1	WBGene00000777	3818.78	0.135987	0.0526554	2.58258	0.00980635	0.221465
fbxc-46	WBGene00012569	73.2579	-0.536504	0.207751	-2.58244	0.00981058	0.221465
aly-1	WBGene00000120	449.665	-0.356078	0.138097	-2.57846	0.00992419	0.223076
D2045.9	WBGene00008426	194.023	-0.413094	0.160201	-2.57859	0.00992044	0.223076
try-10	WBGene00008849	128.574	-0.625241	0.242434	-2.57902	0.0099081	0.223076
zak-1	WBGene00006971	102.476	-0.448873	0.174204	-2.5767	0.00997471	0.223894
F35C11.6	WBGene00009405	43.1936	0.693432	0.269472	2.5733	0.0100735	0.225791
acp-5	WBGene00017427	122.266	-0.407924	0.158909	-2.56702	0.0102576	0.229593
ncr-1	WBGene00003561	268.176	0.465104	0.181393	2.56407	0.0103452	0.230644
gsr-1	WBGene00008117	4033.12	0.153515	0.0598703	2.56412	0.0103439	0.230644
Y48D7A.1	WBGene00021656	34.3477	-0.800319	0.31214	-2.56397	0.0103482	0.230644
Y54G2A.11	WBGene00021876	414.557	0.267581	0.104402	2.56298	0.0103779	0.230982
C43D7.8	WBGene00008070	9.07895	-2.06758	0.807039	-2.56194	0.010409	0.231348
Y69A2AR.19	WBGene00022090	89.4418	1.68584	0.658416	2.56045	0.0104538	0.232018
prk-1	WBGene00004182	324.826	0.257267	0.100506	2.55971	0.010476	0.232186
ins-12	WBGene00002095	4.7981	-1.98538	0.775906	-2.55879	0.0105036	0.232407
T16H12.1	WBGene00011811	80.6884	-0.462268	0.180686	-2.55841	0.0105153	0.232407
AH9.6	WBGene00044701	11.095	-1.21978	0.47707	-2.55681	0.0105636	0.233149
Y53F4B.26	WBGene00013172	94.3603	2.98437	1.1677	2.55578	0.0105951	0.233521
F44F1.6	WBGene00009698	66.9639	-0.752921	0.294658	-2.55524	0.0106116	0.233558
sri-16	WBGene00005528	9.91089	3.55377	1.39127	2.55433	0.0106393	0.233843
F40C5.2	WBGene00018229	90.1432	-0.481377	0.188574	-2.55272	0.0106886	0.234601
pgp-4	WBGene00003998	167.898	-0.343419	0.134597	-2.55147	0.0107269	0.234678
ztf-11	WBGene00009939	263.552	-0.539834	0.21159	-2.55133	0.0107314	0.234678
F10E7.9	WBGene00017350	98.6124	-0.484088	0.189752	-2.55116	0.0107365	0.234678
clec-44	WBGene00019928	11.9932	2.05303	0.805273	2.54948	0.0107883	0.235486
drl-1	WBGene00017578	169.505	-0.324416	0.127337	-2.5477	0.0108436	0.236366
asic-1	WBGene00022815	11.7542	-1.35255	0.531205	-2.54619	0.0108905	0.237062
Y39A1A.21	WBGene00012658	425.552	-0.302062	0.118738	-2.54394	0.010961	0.237937
btb-6	WBGene00018438	254.799	-0.431172	0.169521	-2.54347	0.0109757	0.237937
Y105C5A.28	WBGene00044995	5.43299	2.76975	1.08861	2.54429	0.0109501	0.237937
tbx-38	WBGene00006557	12.3948	-1.3014	0.512385	-2.53989	0.0110889	0.240062
ceh-43	WBGene00000463	112.642	-0.749185	0.295742	-2.53324	0.0113014	0.243664
F47B8.10	WBGene00009811	9.37955	1.55328	0.613052	2.53368	0.0112872	0.243664
T08D2.3	WBGene00011608	189.689	0.449351	0.177359	2.53357	0.0112908	0.243664
fbxb-32	WBGene00019798	6.74122	-2.36582	0.935202	-2.52974	0.0114148	0.245774
cnd-1	WBGene00000561	19.8246	-1.42384	0.563393	-2.52727	0.0114954	0.247175
lfe-2	WBGene00002979	515.561	0.245074	0.0970303	2.52575	0.0115452	0.247909
parn-1	WBGene00010734	932.912	-0.234527	0.0929304	-2.52368	0.0116133	0.249034
kin-6	WBGene00002194	5.40492	2.33347	0.926267	2.51923	0.0117613	0.251791
unc-42	WBGene00006778	26.7241	-1.27295	0.505556	-2.51792	0.011805	0.251791
lhfp-4	WBGene00009155	10.2111	-1.91093	0.758652	-2.51885	0.0117738	0.251791
Y53C12B.1	WBGene00013143	1643.96	-0.239201	0.095	-2.51791	0.0118054	0.251791
elt-1	WBGene00001249	223.244	-0.66065	0.2626	-2.51581	0.0118761	0.252618
ule-1	WBGene00021005	2907.68	0.298712	0.118716	2.5162	0.0118629	0.252618
E03H12.7	WBGene00017114	20.091	3.69602	1.47072	2.51307	0.0119687	0.254247
Y105C5A.25	WBGene00013644	16.5019	-1.70628	0.679103	-2.51255	0.0119862	0.254278
#N/A	WBGene00305980	58.137	0.802732	0.31992	2.50917	0.0121017	0.256384
vps-4	WBGene00021334	2015.02	0.166467	0.0663658	2.50833	0.0121304	0.256649
R193.2	WBGene00020128	922.503	-0.550101	0.2194	-2.5073	0.0121659	0.257058
C49C8.1	WBGene00016765	12.805	3.41342	1.36241	2.50542	0.0122306	0.258079
C16C4.18	WBGene00194998	44.7679	-0.577732	0.230726	-2.50398	0.0122807	0.258792
C07H4.1	WBGene00007421	60.1531	0.684758	0.273596	2.50281	0.0123211	0.259051
T23G11.7	WBGene00011972	1669.65	0.130923	0.0523133	2.50268	0.0123256	0.259051
F33E2.5	WBGene00009361	185.488	-0.60456	0.241832	-2.49992	0.0124223	0.259845
Y42A5A.1	WBGene00012776	31.0725	-0.749548	0.299757	-2.50052	0.0124011	0.259845
Y50E8A.5	WBGene00013048	21.8021	-1.12654	0.450522	-2.50053	0.0124008	0.259845
C35D10.3	WBGene00016441	9.44912	2.37748	0.951098	2.49972	0.012429	0.259845
T25B9.3	WBGene00012009	8.2982	-1.68997	0.676242	-2.49905	0.0124525	0.259989
F12A10.1	WBGene00017390	61.2442	0.631664	0.252808	2.49859	0.0124687	0.259989
F36D3.5	WBGene00009471	26.4646	3.35411	1.34315	2.4972	0.0125177	0.260366
T23F4.2	WBGene00020740	114.463	0.640967	0.25668	2.49715	0.0125196	0.260366
cht-3	WBGene00016084	7089.65	0.246215	0.0986537	2.49576	0.0125689	0.261048
fbxa-48	WBGene00021862	16.407	1.96882	0.790049	2.49203	0.0127017	0.26346
R74.2	WBGene00011278	39.9664	-0.721222	0.289632	-2.49013	0.0127696	0.264523
vps-51	WBGene00015176	1927.34	0.193015	0.0775359	2.48936	0.0127972	0.264748
mrpl-30	WBGene00021021	523.596	0.190695	0.0766181	2.4889	0.0128139	0.264749
ces-1	WBGene00000468	8.1026	-1.87008	0.751809	-2.48743	0.0128669	0.265497
cyp-13B2	WBGene00010606	120.374	-0.421769	0.169717	-2.48513	0.0129505	0.266875
tbb-4	WBGene00006538	64.5613	-0.933971	0.376294	-2.48203	0.0130637	0.268161
nep-1	WBGene00013926	686.042	-0.215849	0.0869612	-2.48213	0.0130601	0.268161
ZK809.9	WBGene00194934	28.705	0.904375	0.364262	2.48276	0.013037	0.268161
Y53F4B.20	WBGene00013166	16.1803	-1.25619	0.50683	-2.47853	0.0131925	0.270454
ZK512.7	WBGene00013986	780.404	-0.353376	0.142611	-2.47789	0.013216	0.270587
age-1	WBGene00000090	2731.55	-0.409242	0.165283	-2.47601	0.0132861	0.271384
rilp-1	WBGene00007860	1609.12	0.167253	0.0675769	2.475	0.0133235	0.271384
imp-2	WBGene00011481	4275.83	0.143033	0.0577696	2.47592	0.0132895	0.271384
H34I24.1	WBGene00019260	9.17507	3.59876	1.45404	2.475	0.0133235	0.271384
rhi-1	WBGene00004356	450.992	0.24487	0.0990685	2.47173	0.0134462	0.273533
C10C6.3	WBGene00007512	13.188	-3.50044	1.41797	-2.46862	0.0135634	0.275564
fkh-9	WBGene00001441	686.88	0.347044	0.140745	2.46576	0.0136721	0.276247
rrp-1	WBGene00008151	853.554	-0.155619	0.0631064	-2.46598	0.0136637	0.276247
Y105C5A.14	WBGene00013638	132.464	-0.468483	0.189969	-2.46611	0.0136591	0.276247
C39D10.7	WBGene00016534	21419.3	0.360076	0.145957	2.46699	0.0136253	0.276247
hot-9	WBGene00044484	13.9764	-1.08276	0.439173	-2.46545	0.0136842	0.276247
Y53F4B.62	WBGene00219491	77.9113	-1.3808	0.560969	-2.46145	0.0138376	0.278989
C54C8.4	WBGene00008292	6.51002	-3.29525	1.34017	-2.45883	0.013939	0.280361
ztf-13	WBGene00018704	226.552	-0.380907	0.154917	-2.45878	0.0139411	0.280361
C53A5.9	WBGene00008267	4.59913	3.3737	1.37309	2.45701	0.0140101	0.281391
best-23	WBGene00014989	14.7628	-1.13901	0.46367	-2.45651	0.0140295	0.281425
snf-1	WBGene00004900	876.77	0.167114	0.0680447	2.45594	0.0140517	0.281513
F13D11.4	WBGene00017429	61.0707	-0.633226	0.257919	-2.45514	0.0140831	0.281787
Y116A8C.29	WBGene00013806	23.2901	-0.863218	0.352206	-2.45089	0.0142504	0.284774
nhr-54	WBGene00003644	16.2589	-1.06622	0.435277	-2.44952	0.0143045	0.284908
sra-38	WBGene00005064	6.2796	-2.92967	1.19607	-2.44942	0.0143086	0.284908
math-1	WBGene00015015	4.34611	3.5171	1.43593	2.44936	0.014311	0.284908
F14H12.6	WBGene00017473	18.6401	-0.992701	0.405746	-2.44661	0.0144208	0.286733
pqn-18	WBGene00004108	218.108	0.479241	0.196139	2.44338	0.0145506	0.288228
C24H12.11	WBGene00016080	20.9182	-1.93545	0.791925	-2.44399	0.0145259	0.288228
Y57G7A.2	WBGene00021966	35.5811	-0.748417	0.306297	-2.44344	0.014548	0.288228
Y39D8A.1	WBGene00021448	190.611	0.440999	0.180527	2.44285	0.0145718	0.288288
fkh-7	WBGene00001439	410.599	-0.34138	0.139836	-2.44129	0.014635	0.288896
Y19D10A.11	WBGene00021226	27.2579	6.98719	2.86221	2.44119	0.014639	0.288896
cutl-9	WBGene00010893	34.663	-1.10548	0.453385	-2.43827	0.0147577	0.290876
ddo-3	WBGene00017648	2494.88	0.140553	0.0576978	2.43602	0.01485	0.291248
Y27F2A.8	WBGene00021299	23.587	-0.911226	0.374054	-2.43608	0.0148473	0.291248
Y54F10BM.6	WBGene00021861	9.78597	-1.35969	0.558158	-2.43603	0.0148494	0.291248
ZK973.8	WBGene00022834	160.989	-0.576064	0.236465	-2.43614	0.0148447	0.291248
Y82E9BR.1	WBGene00022334	50.0622	-0.825612	0.338998	-2.43545	0.0148733	0.291344
grl-2	WBGene00001711	4.23044	-3.50102	1.43914	-2.43272	0.0149859	0.29283
nhr-55	WBGene00003645	73.5459	0.47698	0.196135	2.43189	0.0150201	0.29283
uba-1	WBGene00006699	16510.3	0.209468	0.0861361	2.43182	0.0150231	0.29283
C23G10.5	WBGene00016012	16.8279	-1.22531	0.503852	-2.43188	0.0150206	0.29283
tag-120	WBGene00006470	192.389	0.625488	0.257399	2.43003	0.0150976	0.29356
Y73B3A.21	WBGene00022222	79.1468	-0.474035	0.195053	-2.43028	0.0150871	0.29356
F22D6.2	WBGene00009050	7122.03	0.142943	0.0588881	2.42737	0.0152087	0.294851
F25B3.5	WBGene00009102	46.374	0.751714	0.309716	2.42711	0.0152198	0.294851
T04B2.7	WBGene00011425	16.6293	2.17784	0.896994	2.42793	0.0151855	0.294851
josd-1	WBGene00022190	97.0286	0.429477	0.17701	2.42629	0.0152542	0.295157
pmk-2	WBGene00004056	432.024	-0.442181	0.182287	-2.42574	0.0152772	0.295242
snt-5	WBGene00004925	126.94	0.352423	0.145358	2.42452	0.0153287	0.295876
C40A11.4	WBGene00016547	15.4191	-1.45096	0.598729	-2.42341	0.0153757	0.296422
F53F8.6	WBGene00010003	8.20371	-2.11471	0.872999	-2.42235	0.0154204	0.296921
C53A3.1	WBGene00016891	4.58433	-3.22783	1.33355	-2.42049	0.0154997	0.298088
C45G7.4	WBGene00016671	31.0467	-0.8986	0.371496	-2.41887	0.0155687	0.299052
fut-2	WBGene00001506	4.99749	-3.491	1.44442	-2.41689	0.0156539	0.299992
F43G6.8	WBGene00009660	119.283	-0.364871	0.151025	-2.41597	0.0156934	0.299992
F13H8.5	WBGene00017438	30.2231	0.881924	0.365028	2.41604	0.0156902	0.299992
T13C2.6	WBGene00020481	6586.65	0.179079	0.0741062	2.41652	0.0156699	0.299992
AC8.10	WBGene00043988	163.278	-0.974092	0.403514	-2.41402	0.0157775	0.301235
unc-30	WBGene00006766	21.227	-0.973471	0.403386	-2.41325	0.0158111	0.301514
T05E12.8	WBGene00045382	13.3796	-1.27353	0.527834	-2.41274	0.015833	0.301568
klp-16	WBGene00002226	2973.05	-0.167326	0.0693874	-2.41147	0.0158885	0.3019
C09G9.1	WBGene00007492	2445.89	0.174851	0.0725015	2.41169	0.015879	0.3019
lfor-2	WBGene00045161	7.62835	2.27519	0.943814	2.41063	0.015925	0.302231
K07H8.7	WBGene00019507	36.019	1.04623	0.434377	2.40858	0.0160147	0.30357
Y48G8AL.13	WBGene00021691	837.77	0.218657	0.0908065	2.40794	0.0160426	0.303737
vap-2	WBGene00011462	20.0269	0.882993	0.366935	2.4064	0.0161106	0.304659
tes-1	WBGene00015217	227.211	0.312007	0.129866	2.40254	0.0162817	0.307527
gyg-3	WBGene00013535	8.91068	1.37331	0.57194	2.40114	0.0163443	0.308343
cyy-1	WBGene00022697	1602.54	0.181565	0.0756486	2.40011	0.0163904	0.308844
tap-1	WBGene00006524	229.239	-0.269071	0.112143	-2.39934	0.0164245	0.30912
ttr-8	WBGene00020049	62.5794	-0.54217	0.226339	-2.39539	0.0166026	0.312102
R09B5.11	WBGene00019979	75.5293	-0.422987	0.176631	-2.39475	0.0166316	0.312276
T08B1.1	WBGene00020340	765.945	-0.206141	0.0861607	-2.39252	0.016733	0.313809
D1007.5	WBGene00017003	1373.84	0.143053	0.0598522	2.3901	0.0168437	0.314925
fbxa-92	WBGene00022496	39.4577	0.573476	0.239873	2.39075	0.0168142	0.314925
K05F6.12	WBGene00045486	11.3928	-1.37175	0.573973	-2.38992	0.0168522	0.314925
F13H8.11	WBGene00017443	67.2869	-0.483956	0.202631	-2.38835	0.016924	0.315895
F31D5.7	WBGene00206414	9.71493	-1.24988	0.523754	-2.38639	0.0170147	0.317213
T06D4.6	WBGene00206385	4.54934	-3.21763	1.34871	-2.38571	0.0170461	0.317426
nlp-68	WBGene00011899	19.0788	-0.81795	0.343003	-2.38467	0.0170944	0.317953
cka-1	WBGene00000509	1300.45	0.208295	0.0874614	2.38156	0.0172394	0.318036
gcy-36	WBGene00001556	9.68933	-1.66666	0.699167	-2.38378	0.0171358	0.318036
ubc-7	WBGene00006704	4104.65	0.175461	0.0736092	2.38368	0.0171405	0.318036
C05G5.5	WBGene00007351	17.5811	-1.27494	0.535162	-2.38235	0.0172028	0.318036
ceh-51	WBGene00013583	13.1657	-1.11315	0.467156	-2.38282	0.0171806	0.318036
EEED8.15	WBGene00017143	284.671	-0.431488	0.181059	-2.38313	0.0171661	0.318036
C14E2.12	WBGene00219816	62.443	-0.592162	0.248643	-2.38158	0.0172387	0.318036
mel-26	WBGene00003209	4401.47	0.160804	0.0675598	2.38017	0.0173048	0.3185
Y48C3A.14	WBGene00012995	1972.89	0.168709	0.0708749	2.38038	0.0172949	0.3185
F36G9.13	WBGene00009489	11.2439	3.53169	1.48544	2.37754	0.0174286	0.320408
R05D3.3	WBGene00019878	135.396	-0.336538	0.141578	-2.37704	0.0174521	0.320468
C09D4.2	WBGene00015633	239.165	0.336163	0.141448	2.37659	0.0174734	0.320488
lurp-1	WBGene00009700	15.8593	-1.03776	0.437011	-2.37468	0.0175644	0.321412
sdz-7	WBGene00016779	10.6743	-1.22553	0.516005	-2.37502	0.0175478	0.321412
pak-2	WBGene00006443	2363.92	0.159024	0.0669788	2.37425	0.0175847	0.321412
sqst-1	WBGene00011737	2383.66	0.475013	0.200179	2.37295	0.0176469	0.321806
Y41C4A.7	WBGene00012754	6.24258	3.48441	1.46815	2.37333	0.0176287	0.321806
ZK1010.8	WBGene00014181	64.9727	0.809164	0.341168	2.37175	0.0177042	0.322481
lin-1	WBGene00002990	230.208	0.492066	0.207556	2.37077	0.0177513	0.322967
F55D12.6	WBGene00010114	10.8229	3.48164	1.47089	2.36703	0.0179314	0.32587
K04G2.10	WBGene00010568	190.838	-0.378436	0.159935	-2.36618	0.0179726	0.325871
B0304.2	WBGene00015134	755.15	0.229054	0.0967923	2.36645	0.0179595	0.325871
egl-44	WBGene00001208	424.444	0.364555	0.15429	2.3628	0.0181377	0.328489
ech-1.1	WBGene00001150	78.1748	-0.998525	0.422974	-2.36072	0.0182395	0.329955
Y39A3CL.1	WBGene00021440	1708.16	0.157607	0.0667862	2.35988	0.0182808	0.330326
miro-3	WBGene00021651	35.4771	-0.653439	0.277196	-2.35732	0.0184075	0.332126
Y52B11A.12	WBGene00077539	13.294	-1.28507	0.54521	-2.35702	0.0184223	0.332126
dhs-5	WBGene00000969	100.075	-0.56579	0.240149	-2.356	0.018473	0.332478
F29A7.4	WBGene00017914	9.41159	-1.35017	0.573131	-2.35578	0.0184838	0.332478
R74.10	WBGene00206525	12.0964	1.10755	0.470717	2.3529	0.0186277	0.334685
F23D12.2	WBGene00009086	365.57	0.354247	0.150779	2.34944	0.0188016	0.337427
cutl-16	WBGene00019426	75.3558	-0.785008	0.334469	-2.34703	0.0189239	0.339238
hog-1	WBGene00001984	18.0295	-1.00189	0.427289	-2.34476	0.0190396	0.339878
C49F5.6	WBGene00008210	1272.72	0.201344	0.0858742	2.34464	0.0190454	0.339878
F22H10.5	WBGene00017729	45.9739	0.837736	0.357167	2.3455	0.0190015	0.339878
T26C12.3	WBGene00020833	38.3314	-0.916899	0.390961	-2.34524	0.0190147	0.339878
gcy-34	WBGene00001554	9.82671	1.54892	0.661038	2.34317	0.0191208	0.340076
H43I07.1	WBGene00019274	968.977	0.167088	0.0713044	2.3433	0.0191139	0.340076
T24C4.2	WBGene00020758	249.623	-0.479312	0.204546	-2.3433	0.019114	0.340076
sft-1	WBGene00004787	307.521	-0.315122	0.134565	-2.34177	0.0191925	0.340967
sox-2	WBGene00004949	199.224	-0.484815	0.207081	-2.34119	0.0192223	0.341115
fbxb-117	WBGene00010099	21.9413	-1.30746	0.558982	-2.33899	0.0193357	0.342744
Y39H10A.6	WBGene00021482	413.286	-0.285877	0.122309	-2.33734	0.0194217	0.343883
lin-32	WBGene00003018	11.5501	-1.94072	0.830662	-2.33635	0.0194728	0.34402
clec-196	WBGene00009156	100.171	-0.998073	0.427123	-2.33673	0.019453	0.34402
pcyt-1	WBGene00017241	726.002	-0.203476	0.0871173	-2.33566	0.0195092	0.344278
glo-2	WBGene00019010	43.1525	0.586335	0.251172	2.33439	0.0195751	0.345058
F46F11.10	WBGene00018513	317.407	0.241978	0.103686	2.33375	0.0196086	0.345264
#N/A	WBGene00306003	27.2013	-0.853235	0.365673	-2.33333	0.0196308	0.345271
C27C12.3	WBGene00007773	615.503	0.247936	0.106312	2.33216	0.0196921	0.345965
F57B9.8	WBGene00018999	10.6566	-3.30248	1.41726	-2.33019	0.0197961	0.347408
F44E5.15	WBGene00206377	5.71807	-1.76098	0.756538	-2.32769	0.0199287	0.349348
prx-1	WBGene00004191	139.675	0.597927	0.257157	2.32514	0.0200644	0.351338
F55H2.5	WBGene00010131	648.171	0.172306	0.0741606	2.32342	0.0201568	0.352106
F41C6.4	WBGene00018278	20.7339	-0.931079	0.400741	-2.32339	0.0201581	0.352106
F46E10.2	WBGene00018489	72.9584	-0.837008	0.360366	-2.32266	0.0201972	0.352106
F40G9.18	WBGene00189954	10.974	-1.21107	0.521353	-2.32294	0.0201822	0.352106
wht-1	WBGene00015479	49.3821	-0.823814	0.354896	-2.32129	0.0202714	0.353012
ngn-1	WBGene00003595	17.9181	-1.17278	0.50543	-2.32036	0.0203213	0.353105
T20D4.9	WBGene00020615	3.74669	2.135	0.920104	2.32039	0.02032	0.353105
frpr-4	WBGene00016909	12.1348	1.02678	0.442827	2.31869	0.0204119	0.35326
CD4.8	WBGene00016993	442.309	-0.227012	0.0979113	-2.31855	0.0204194	0.35326
sup-36	WBGene00018164	486.834	-0.292468	0.126133	-2.31872	0.0204102	0.35326
fbxb-71	WBGene00018236	13.2343	-1.27028	0.547697	-2.31932	0.0203778	0.35326
R03D7.2	WBGene00010989	702.259	0.253526	0.109387	2.31769	0.0204662	0.353684
Y54F10BM.3	WBGene00021858	32.1776	1.68612	0.728415	2.31478	0.0206248	0.356037
Y34D9A.8	WBGene00021333	47.847	0.784852	0.339579	2.31125	0.0208191	0.359
W09D10.4	WBGene00012362	1900.79	0.202826	0.0877844	2.3105	0.0208607	0.359325
lbp-1	WBGene00002253	650.428	-0.343175	0.148579	-2.30971	0.020904	0.35968
fkh-2	WBGene00001434	22.1721	-1.09134	0.472667	-2.30889	0.0209496	0.360074
B0361.11	WBGene00015165	8.42377	-2.78632	1.20731	-2.30787	0.0210064	0.360659
C52E2.4	WBGene00016883	15.0001	-1.09381	0.474228	-2.30651	0.0210824	0.361182
Y71H2AM.3	WBGene00022168	1019.25	0.144097	0.0624698	2.30667	0.0210732	0.361182
F44E5.16	WBGene00219949	8.05499	-1.20169	0.521215	-2.30555	0.0211359	0.361706
unc-3	WBGene00006743	31.3266	-1.02569	0.445126	-2.30427	0.0212076	0.362543
fbxb-86	WBGene00012098	9.06991	-1.69337	0.73536	-2.30278	0.021291	0.363185
C30F12.5	WBGene00016264	230.14	-0.468296	0.20334	-2.30302	0.0212777	0.363185
oig-1	WBGene00003859	11.2598	-1.25212	0.543916	-2.30204	0.0213331	0.363204
E02H4.2	WBGene00008460	30.8594	0.773617	0.33607	2.30195	0.021338	0.363204
C49G9.2	WBGene00045474	9.18851	-1.53919	0.669451	-2.29919	0.0214944	0.365474
srh-71	WBGene00005292	9.35317	1.41486	0.615668	2.29809	0.0215566	0.366139
lin-18	WBGene00003007	133.618	-0.344362	0.149979	-2.29607	0.0216721	0.367706
F49E11.2	WBGene00009889	15.9549	-0.869281	0.378746	-2.29515	0.0217243	0.368198
mog-4	WBGene00003392	2176.48	0.29045	0.126676	2.29287	0.0218558	0.369241
K07H8.2	WBGene00019504	3291.75	0.127935	0.0557865	2.2933	0.0218308	0.369241
F23C8.14	WBGene00255457	5.57629	-1.82285	0.794996	-2.2929	0.0218537	0.369241
F39B2.8	WBGene00009558	68.8648	-0.50073	0.218491	-2.29176	0.0219194	0.36964
npr-31	WBGene00020319	11.4903	1.15121	0.502348	2.29165	0.021926	0.36964
prx-3	WBGene00004193	179.685	-0.413844	0.180799	-2.28897	0.0220811	0.371802
W05H12.2	WBGene00012290	6.04466	-2.00118	0.874401	-2.28862	0.0221012	0.371802
pde-3	WBGene00008443	224.881	0.411407	0.179818	2.28791	0.0221427	0.372106
spl-2	WBGene00006418	39.022	-0.608684	0.26648	-2.28417	0.0223616	0.374745
zip-1	WBGene00006986	240.103	0.443516	0.194183	2.28401	0.0223707	0.374745
ZK688.7	WBGene00022802	73.1885	-0.425201	0.186125	-2.28449	0.0223425	0.374745
spe-44	WBGene00007732	309.857	-0.285211	0.124897	-2.28356	0.0223972	0.374792
unc-36	WBGene00006772	156.448	-0.65573	0.287218	-2.28304	0.0224281	0.374914
fbxc-14	WBGene00016298	12.6326	-1.35037	0.591604	-2.28256	0.0224564	0.374992
W10G11.19	WBGene00021148	92.1298	-0.463922	0.203349	-2.2814	0.0225246	0.375733
B0563.1	WBGene00015261	6.89627	-1.78128	0.780965	-2.28087	0.0225564	0.375869
ufd-2	WBGene00006734	4504.21	-0.110364	0.0484082	-2.27986	0.0226162	0.376469
unc-24	WBGene00006761	25.9185	-0.819547	0.35966	-2.27867	0.0226867	0.376833
F39B2.5	WBGene00009556	387.754	0.237011	0.104049	2.27789	0.0227331	0.376833
ykt-6	WBGene00015164	1012.56	0.20113	0.0882621	2.27878	0.0226801	0.376833
F53A9.6	WBGene00018729	42.1122	0.77043	0.338192	2.27808	0.0227216	0.376833
C15H9.5	WBGene00015801	347.392	-0.218211	0.0958172	-2.27736	0.0227646	0.376959
ctc-2	WBGene00010965	7738.45	0.744168	0.327082	2.27517	0.0228956	0.378734
Y51B9A.10	WBGene00044170	9.98624	-1.39662	0.61464	-2.27226	0.0230708	0.381234
ipla-2	WBGene00009801	847.778	0.285694	0.125803	2.27096	0.0231493	0.382132
dsl-6	WBGene00001108	48.7758	-0.893188	0.393521	-2.26974	0.0232237	0.382961
ZK858.2	WBGene00014116	51.2558	2.12343	0.936432	2.26758	0.0233551	0.383929
Y53C10A.1	WBGene00014915	374.853	-0.241805	0.106625	-2.2678	0.0233413	0.383929
clec-266	WBGene00016088	506.062	-0.63925	0.281836	-2.26816	0.0233193	0.383929
ensh-1	WBGene00017013	31.7623	-0.666393	0.293978	-2.26681	0.0234016	0.384172
R03G5.6	WBGene00019847	125.293	-0.339028	0.14958	-2.26654	0.0234183	0.384172
F37D6.4	WBGene00009510	8.07233	-1.8588	0.821406	-2.26295	0.0236389	0.387389
snap-29	WBGene00019305	2179.14	0.145663	0.0644082	2.26156	0.0237246	0.388145
snpc-3.2	WBGene00021667	164.777	-0.367055	0.162313	-2.26141	0.023734	0.388145
fbxa-184	WBGene00018439	12.2377	-1.13051	0.500676	-2.25797	0.0239475	0.391233
klf-1	WBGene00018990	290.479	0.377613	0.167656	2.25232	0.0243024	0.396622
Y66D12A.16	WBGene00013442	571.68	0.272604	0.121061	2.25179	0.0243356	0.396741
EGAP2.2	WBGene00017148	24.753	-1.40219	0.622807	-2.25141	0.0243598	0.396741
F37B12.1	WBGene00009504	87.1625	0.506985	0.225281	2.25045	0.0244203	0.397318
slo-1	WBGene00004830	120.818	0.45543	0.202413	2.25001	0.0244484	0.397367
galt-1	WBGene00019763	13.2547	-1.03711	0.461265	-2.24841	0.0245501	0.398613
M176.9	WBGene00014813	24.5823	1.20759	0.537644	2.24608	0.0246988	0.400616
fkb-6	WBGene00001431	5378.5	0.13631	0.0607159	2.24504	0.0247657	0.401029
edc-3	WBGene00011036	3687	0.158055	0.0704065	2.24489	0.0247749	0.401029
F08F1.9	WBGene00017259	11.7099	-1.5659	0.698014	-2.24337	0.0248729	0.402205
cpt-6	WBGene00020911	398.489	-0.328276	0.146414	-2.24212	0.0249537	0.403101
F52F12.5	WBGene00009938	27.5881	3.23468	1.44467	2.23904	0.0251533	0.405085
ZC513.7	WBGene00023209	2389.44	0.202837	0.0905898	2.23907	0.0251513	0.405085
Y41C4A.29	WBGene00206423	462.731	0.184772	0.0824965	2.23975	0.025107	0.405085
lipl-6	WBGene00021963	16.9228	-1.05703	0.472229	-2.23838	0.0251964	0.405367
nhr-274	WBGene00021522	757.142	0.199236	0.08904	2.2376	0.025247	0.40577
C16A11.4	WBGene00015817	1756.99	-0.159092	0.0711637	-2.23557	0.0253798	0.407079
F54E7.9	WBGene00018831	296.642	-0.240805	0.107713	-2.23562	0.0253768	0.407079
C06C3.12	WBGene00175031	5.96732	-1.8846	0.843316	-2.23474	0.0254341	0.407538
abts-4	WBGene00019844	312.093	0.263761	0.118128	2.23285	0.0255591	0.409127
Y57A10C.1	WBGene00013280	13.6028	-1.24944	0.559675	-2.23244	0.0255861	0.409146
Y46H3C.7	WBGene00021607	243.705	0.301483	0.135072	2.23202	0.0256135	0.409171
Y51A2B.2	WBGene00013066	7.34724	2.1098	0.945696	2.23095	0.0256845	0.409892
ZK1053.4	WBGene00014199	369.792	-0.423447	0.19009	-2.22762	0.0259061	0.413011
mop-25.2	WBGene00013140	1381.83	0.12796	0.0574777	2.22625	0.0259976	0.414054
F40G9.9	WBGene00018245	12.7034	-1.13068	0.508244	-2.22469	0.026102	0.414468
fbxa-71	WBGene00020639	14.4703	0.991097	0.445439	2.22499	0.026082	0.414468
Y48G1BM.2	WBGene00021668	9.86526	-1.61985	0.728072	-2.22485	0.0260916	0.414468
bath-10	WBGene00021726	54.2684	-0.738972	0.332378	-2.22328	0.0261966	0.415553
ctc-3	WBGene00010962	15789.5	0.446082	0.200696	2.22268	0.0262376	0.415727
F53F10.8	WBGene00044423	240.235	0.314205	0.141384	2.22234	0.0262601	0.415727
T28F4.5	WBGene00012140	2543.25	0.431418	0.194278	2.22062	0.0263764	0.417153
E01G4.3	WBGene00008446	556.9	0.238383	0.107393	2.21972	0.026438	0.417294
Y76B12C.3	WBGene00022297	582.765	-0.247896	0.111674	-2.21982	0.0264308	0.417294
C44C1.1	WBGene00016641	251.285	-0.352653	0.15893	-2.21892	0.0264919	0.417729
F27B10.1	WBGene00017850	20.1655	-0.798664	0.360049	-2.21821	0.0265406	0.417783
T22F7.3	WBGene00020702	41.8666	0.75311	0.33953	2.2181	0.0265481	0.417783
F36H5.17	WBGene00270293	6.51494	-1.81898	0.820279	-2.21752	0.0265879	0.417994
unc-39	WBGene00006775	30.4534	-1.14792	0.518818	-2.21257	0.0269276	0.42214
C38H2.3	WBGene00008020	37.6962	0.595258	0.268958	2.2132	0.0268837	0.42214
eif-2A	WBGene00008480	8484.78	0.0870638	0.0393507	2.21251	0.0269315	0.42214
fbxb-53	WBGene00018104	30.8372	-0.909835	0.411754	-2.20966	0.027129	0.424815
F41E7.1	WBGene00009617	135.28	0.324496	0.146959	2.20808	0.027239	0.425152
F53B3.6	WBGene00018744	98.0896	0.453358	0.205239	2.20893	0.0271795	0.425152
M02D8.3	WBGene00019729	522.474	-0.278135	0.125946	-2.20836	0.027219	0.425152
#N/A	WBGene00305092	22.4251	0.795837	0.360465	2.20781	0.0272578	0.425152
R13A5.10	WBGene00020052	40.7257	-0.639846	0.289952	-2.20673	0.0273329	0.425904
K02G10.5	WBGene00019346	47.3097	-0.58516	0.265229	-2.20625	0.0273668	0.426013
Y54G2A.21	WBGene00021886	339.232	0.273543	0.12401	2.2058	0.0273977	0.426075
plst-1	WBGene00022425	3196.08	0.126163	0.0572529	2.20361	0.0275516	0.428049
unc-108	WBGene00006833	2666.4	0.114128	0.0518365	2.20169	0.0276873	0.428197
F25D7.5	WBGene00009114	5.90427	3.22498	1.46486	2.20156	0.0276962	0.428197
R10E11.6	WBGene00011218	375.561	0.196178	0.0890791	2.20229	0.0276448	0.428197
sdz-38	WBGene00014131	19.1324	-1.07461	0.487928	-2.2024	0.0276373	0.428197
C46E10.9	WBGene00016713	58.8863	-0.437971	0.198873	-2.20226	0.0276467	0.428197
rab-5	WBGene00004268	2987.28	0.142702	0.0648561	2.20028	0.0277868	0.428344
acs-18	WBGene00011173	40.2942	3.00892	1.3673	2.20063	0.0277621	0.428344
E03H12.5	WBGene00017112	70.431	3.00931	1.36747	2.20064	0.0277615	0.428344
col-69	WBGene00000645	4.40141	2.12361	0.965934	2.1985	0.0279134	0.429759
C50F4.8	WBGene00008233	99.1535	-0.364852	0.165975	-2.19823	0.0279328	0.429759
fbxa-59	WBGene00020455	129.012	0.660215	0.300529	2.19684	0.0280316	0.430442
F09G8.10	WBGene00044444	7.26077	1.45822	0.663732	2.19701	0.0280199	0.430442
C37A5.3	WBGene00014698	6.06439	2.86462	1.30424	2.19638	0.0280645	0.430531
fbxa-129	WBGene00010294	74.1459	-0.479002	0.218269	-2.19455	0.0281961	0.432131
Y46G5A.36	WBGene00012921	4.83385	2.33462	1.06421	2.19376	0.0282527	0.432251
maph-9	WBGene00016397	18.3084	-1.24242	0.566363	-2.19368	0.0282585	0.432251
nhr-88	WBGene00003678	376.861	0.531715	0.242451	2.19308	0.0283013	0.432489
faah-4	WBGene00013232	1147.68	0.136667	0.0623425	2.19219	0.0283656	0.433053
F31D4.5	WBGene00009292	114.776	-0.629525	0.287249	-2.19157	0.0284106	0.433324
F32A11.5	WBGene00009310	49.3792	-0.509351	0.232565	-2.19014	0.0285139	0.434103
F54C9.9	WBGene00010044	2451.3	-0.131471	0.0600324	-2.19	0.0285245	0.434103
F52B10.3	WBGene00044304	39.0375	-1.19769	0.546957	-2.18973	0.0285439	0.434103
T04A8.7	WBGene00011409	4037.26	0.111644	0.050999	2.18915	0.028586	0.434326
Y38E10A.3	WBGene00012581	31.0703	-0.868674	0.39701	-2.18804	0.0286668	0.434705
C23H5.8	WBGene00016027	2089.13	-0.258013	0.117939	-2.18768	0.0286932	0.434705
nphp-2	WBGene00021304	26.4821	-1.13659	0.519447	-2.18807	0.0286644	0.434705
calu-2	WBGene00017240	189.926	-0.277393	0.126918	-2.18562	0.0288434	0.436564
hex-4	WBGene00021766	1037.04	0.179688	0.0822294	2.1852	0.028874	0.436609
erd-2.1	WBGene00001331	797.716	-0.236728	0.108399	-2.18386	0.0289722	0.437676
C18H2.3	WBGene00015990	7.07295	3.05147	1.39778	2.18308	0.0290299	0.43813
mev-1	WBGene00003225	1748.27	0.1359	0.0623642	2.17913	0.0293222	0.4417
fbxb-8	WBGene00009861	18.6222	-1.1454	0.525622	-2.17913	0.0293217	0.4417
pup-3	WBGene00019082	231.928	-0.247671	0.113701	-2.17827	0.029386	0.442242
ugt-52	WBGene00018931	23.838	-0.816853	0.37518	-2.17723	0.0294634	0.442985
fkh-4	WBGene00001436	176.166	-0.429164	0.197263	-2.17559	0.0295861	0.444408
ZC168.2	WBGene00013856	11.7396	-1.19867	0.551296	-2.17427	0.0296851	0.444947
F53F10.2	WBGene00018764	4134.48	0.132486	0.0609413	2.17399	0.0297062	0.444947
K07C5.13	WBGene00050947	53.5853	0.943709	0.434042	2.17423	0.0296876	0.444947
mans-2	WBGene00008258	566.83	-0.214558	0.0987681	-2.17234	0.0298301	0.446133
got-2.2	WBGene00015778	3020.54	0.123772	0.0569806	2.17219	0.0298417	0.446133
F55F3.2	WBGene00010116	196.434	-0.448117	0.206352	-2.17162	0.0298847	0.446355
sup-17	WBGene00006324	4975.74	0.121042	0.0557783	2.17005	0.0300028	0.446436
fbxa-193	WBGene00010295	98.141	-0.338886	0.156132	-2.17051	0.0299682	0.446436
Y47D3B.6	WBGene00012942	114.531	0.922909	0.425264	2.1702	0.0299914	0.446436
Y69A2AR.18	WBGene00022089	10366.6	0.0775835	0.0357505	2.17014	0.0299962	0.446436
R01E6.7	WBGene00010971	7.97878	-2.0342	0.93765	-2.16947	0.0300471	0.446676
best-1	WBGene00007203	25.2772	0.678298	0.31275	2.16882	0.0300964	0.446989
try-6	WBGene00006624	18.4425	1.16987	0.53957	2.16815	0.0301473	0.447197
C05D9.12	WBGene00219800	43.1409	-0.447274	0.206317	-2.16789	0.0301668	0.447197
F58H7.5	WBGene00019070	29.3001	-1.51623	0.699813	-2.16661	0.0302643	0.448223
C28H8.2	WBGene00016193	18.7246	1.17942	0.544638	2.16552	0.030348	0.449042
Y53H1B.2	WBGene00013181	742.312	0.305039	0.140911	2.16477	0.0304057	0.449476
F49E8.6	WBGene00018637	154.933	0.265416	0.122653	2.16397	0.030467	0.449669
#N/A	WBGene00305173	26.2823	0.967323	0.447037	2.16386	0.0304755	0.449669
emb-8	WBGene00001262	3542.91	0.0894446	0.0413916	2.16094	0.0307003	0.449866
lag-2	WBGene00002246	12.9054	-1.13573	0.526123	-2.15867	0.0308756	0.449866
zig-3	WBGene00006980	57.0619	-0.593553	0.274979	-2.15854	0.0308862	0.449866
F31C3.6	WBGene00009288	88.0188	-0.385261	0.178327	-2.16042	0.0307405	0.449866
scav-5	WBGene00011076	158.04	-0.340117	0.157354	-2.16148	0.0306583	0.449866
Y37D8A.16	WBGene00012554	173.62	-0.433433	0.20036	-2.16327	0.0305203	0.449866
Y62E10A.19	WBGene00013385	36.3161	-0.776523	0.359512	-2.15994	0.0307774	0.449866
hex-2	WBGene00015767	297.613	-0.41262	0.190876	-2.16172	0.0306395	0.449866
C18H2.5	WBGene00015992	21.9559	3.16195	1.46225	2.16239	0.030588	0.449866
fbxb-106	WBGene00017911	14.6586	-1.16533	0.538781	-2.16291	0.0305484	0.449866
F37C4.4	WBGene00018144	49.4129	0.619863	0.287151	2.15867	0.0308761	0.449866
F59A7.8	WBGene00019095	301.527	-0.29427	0.13625	-2.15978	0.0307897	0.449866
cif-1	WBGene00019543	4478.4	0.0940155	0.0435283	2.15987	0.0307827	0.449866
alr-1	WBGene00044330	70.4323	-0.525614	0.24345	-2.15902	0.0308485	0.449866
Y4C6B.3	WBGene00021157	48.7576	0.938172	0.43498	2.15681	0.0310202	0.451402
R08F11.7	WBGene00019970	7.86295	1.84567	0.856004	2.15615	0.0310721	0.451743
R05H5.4	WBGene00011039	388.905	0.258682	0.120001	2.15566	0.0311099	0.451878
cul-3	WBGene00000838	5758.07	0.0984688	0.0457026	2.15456	0.0311965	0.451894
ppw-2	WBGene00004094	2402.65	-0.331912	0.154002	-2.15524	0.0311428	0.451894
ttb-1	WBGene00006648	1448.32	0.132078	0.0612959	2.15476	0.0311809	0.451894
cec-4	WBGene00017990	825.246	-0.168221	0.0781164	-2.15347	0.031282	0.452717
F57F4.1	WBGene00019015	16.7327	3.17867	1.47637	2.15304	0.0313159	0.452795
F32B5.1	WBGene00017975	122.021	0.994339	0.462223	2.15121	0.0314594	0.454455
nlp-57	WBGene00008589	9.72405	-1.15698	0.538035	-2.15039	0.0315246	0.454897
ddb-1	WBGene00010890	2932.31	0.185258	0.0861627	2.1501	0.0315474	0.454897
bath-45	WBGene00009247	412.828	-0.644832	0.300134	-2.14848	0.0316756	0.456331
igcm-1	WBGene00018215	100.602	-0.762329	0.354957	-2.14767	0.0317402	0.456846
C28G1.4	WBGene00016189	86.6031	-0.475852	0.221615	-2.1472	0.0317775	0.456967
nipi-3	WBGene00010700	1114.04	0.224832	0.104759	2.14619	0.0318578	0.457706
gcs-1	WBGene00001527	2310.32	0.106517	0.0496682	2.14456	0.0319877	0.458327
irx-1	WBGene00007984	159.193	-0.530864	0.247517	-2.14476	0.0319721	0.458327
ubql-1	WBGene00008852	3576.17	0.0949966	0.0442849	2.14513	0.0319428	0.458327
F53H4.6	WBGene00010011	258.285	0.276038	0.128778	2.14351	0.0320722	0.459122
M01F1.8	WBGene00010814	826.063	0.163163	0.0761792	2.14183	0.0322075	0.459399
ttr-26	WBGene00013079	155.057	0.782165	0.365185	2.14183	0.0322071	0.459399
xrep-4	WBGene00018509	2118.76	0.097626	0.0455758	2.14206	0.0321887	0.459399
aak-1	WBGene00019801	1009.64	0.157692	0.0735942	2.14273	0.0321349	0.459399
htp-1	WBGene00002032	1445.37	-0.191909	0.089663	-2.14033	0.0323279	0.460245
F19H6.6	WBGene00008961	8.94646	1.98012	0.925056	2.14055	0.0323107	0.460245
perm-2	WBGene00016636	13876.7	0.155349	0.0725927	2.14001	0.032354	0.460245
mml-1	WBGene00003378	784.604	0.282784	0.132188	2.13925	0.0324153	0.460705
K12H6.7	WBGene00019687	34.0207	-0.811934	0.379685	-2.13844	0.032481	0.461225
F46C3.6	WBGene00045253	25.3817	0.827725	0.387352	2.13688	0.0326075	0.462348
#N/A	WBGene00304792	16.7686	-1.25478	0.587239	-2.13675	0.0326184	0.462348
nex-1	WBGene00003588	2699.39	0.175007	0.0819932	2.1344	0.0328097	0.462375
nhr-45	WBGene00003635	253.556	0.361842	0.169543	2.13422	0.0328246	0.462375
C17C3.2	WBGene00015888	21.4502	6.25765	2.93029	2.1355	0.0327198	0.462375
K02E7.6	WBGene00019311	73.8418	-0.779003	0.364688	-2.13608	0.032673	0.462375
T04G9.4	WBGene00020215	162.412	-0.338685	0.158683	-2.13434	0.0328149	0.462375
T07D3.4	WBGene00020307	81.7357	-0.450251	0.210951	-2.13439	0.0328108	0.462375
algn-12	WBGene00022629	1682.95	0.120314	0.0563692	2.13438	0.0328113	0.462375
fbxb-88	WBGene00016359	41.3201	-0.69623	0.326385	-2.13316	0.032912	0.462409
C35B1.7	WBGene00016436	4.58379	-1.67088	0.783302	-2.13312	0.0329146	0.462409
enu-3.4	WBGene00021034	57.1554	-0.740747	0.347197	-2.13351	0.0328833	0.462409
dhp-2	WBGene00000964	126.327	-0.286059	0.134132	-2.13267	0.0329519	0.462524
dhs-18	WBGene00000981	224.096	-0.30825	0.144587	-2.13194	0.0330121	0.462627
Y39A1A.9	WBGene00012648	31.3354	-0.912076	0.427829	-2.13187	0.0330177	0.462627
arrd-15	WBGene00014033	23.0173	-0.76679	0.360025	-2.12983	0.0331859	0.463459
perm-5	WBGene00016955	2659.55	0.110681	0.0519693	2.12973	0.0331941	0.463459
lips-12	WBGene00020473	31.7117	-1.00701	0.47268	-2.13043	0.0331361	0.463459
ZC204.12	WBGene00022562	44.8978	-0.919014	0.431424	-2.13019	0.0331563	0.463459
rbd-1	WBGene00004315	2576.17	-0.151068	0.0709832	-2.12822	0.0333185	0.464378
T09B4.7	WBGene00020381	4.70748	2.16019	1.01491	2.12846	0.0332991	0.464378
Y19D2B.2	WBGene00012490	8.33655	-1.44374	0.678789	-2.12693	0.0334259	0.465465
Y38F1A.4	WBGene00012607	50.9724	1.23247	0.58001	2.12491	0.033594	0.466576
Y39B6A.31	WBGene00012690	6.14557	-3.06214	1.44063	-2.12556	0.0335403	0.466576
ZK418.7	WBGene00022736	81.591	0.499802	0.235199	2.12502	0.0335851	0.466576
ZK287.1	WBGene00013962	95.4239	-0.607313	0.285914	-2.12411	0.0336611	0.466691
nstp-4	WBGene00015404	1198.11	0.133224	0.0627119	2.12438	0.033638	0.466691
gpb-2	WBGene00001680	177.024	-0.389894	0.183596	-2.12365	0.0336992	0.466811
cyp-33C5	WBGene00018261	15.033	-1.05266	0.49615	-2.12165	0.0338671	0.468331
duox-2	WBGene00018771	4.35779	2.23887	1.05526	2.12164	0.033868	0.468331
dhs-13	WBGene00000976	1813.87	0.176143	0.0830534	2.12084	0.0339351	0.468769
CE7X_3.2	WBGene00008350	7.45403	-1.24231	0.585939	-2.12021	0.0339885	0.468769
ins-39	WBGene00017668	3.13344	3.08219	1.45371	2.12023	0.033987	0.468769
cdc-42	WBGene00000390	3921.47	0.159586	0.0752842	2.11978	0.0340243	0.468854
hsp-4	WBGene00002008	13414.8	0.159566	0.0753107	2.11876	0.0341104	0.469633
fbxa-122	WBGene00014917	82.2159	-0.375352	0.177247	-2.11768	0.034202	0.469669
F56D2.3	WBGene00018965	30.6762	-0.864778	0.408227	-2.11838	0.0341432	0.469669
cpr-8	WBGene00021070	269.7	-0.29358	0.138631	-2.1177	0.0342004	0.469669
ech-2	WBGene00001151	500.064	-0.183461	0.0866854	-2.11641	0.0343103	0.469747
lam-1	WBGene00002247	3109.9	0.354391	0.167436	2.11657	0.0342962	0.469747
pvf-1	WBGene00004249	236.934	0.30072	0.142174	2.11515	0.0344172	0.469747
spp-10	WBGene00004995	3402.13	0.12833	0.0606602	2.11555	0.0343829	0.469747
fipr-24	WBGene00007992	21.7798	2.85606	1.35045	2.11489	0.0344395	0.469747
ZK550.5	WBGene00013999	83.6835	-2.82907	1.33795	-2.11448	0.0344744	0.469747
fbxa-47	WBGene00016527	11.5243	2.67622	1.2656	2.11458	0.0344657	0.469747
kcc-3	WBGene00019289	75.7854	-0.401196	0.189559	-2.11647	0.0343049	0.469747
mrps-18A	WBGene00022583	834.576	-0.235417	0.111281	-2.11553	0.034385	0.469747
C18E9.5	WBGene00007685	384.927	-0.23494	0.111205	-2.11268	0.0346285	0.471441
F15B9.6	WBGene00008850	19.2974	0.933954	0.442234	2.1119	0.0346951	0.471537
F53B3.3	WBGene00018742	25.5341	-1.01323	0.479707	-2.11218	0.0346712	0.471537
C33H5.13	WBGene00016379	83.6704	0.453292	0.214756	2.11073	0.0347952	0.472001
F39E9.1	WBGene00018194	58.5473	0.510477	0.241849	2.11073	0.0347957	0.472001
F16B3.3	WBGene00044774	23.7371	-0.727327	0.344629	-2.11046	0.0348185	0.472001
rde-1	WBGene00004323	2168.34	-0.140507	0.0665959	-2.10984	0.0348719	0.472161
rpt-6	WBGene00004506	3206.72	0.117019	0.0554688	2.10963	0.0348899	0.472161
Y47H10A.6	WBGene00077537	48.4858	-0.600204	0.284705	-2.10816	0.0350171	0.473477
asm-1	WBGene00000211	200.262	0.321258	0.152552	2.10589	0.0352136	0.474919
F28F5.6	WBGene00017905	68.4186	0.524509	0.249048	2.10606	0.0351994	0.474919
twk-49	WBGene00019904	73.8922	-0.538377	0.25564	-2.10599	0.035205	0.474919
C08B11.9	WBGene00007436	630.469	-0.166334	0.0790109	-2.10521	0.035273	0.475034
F58B6.1	WBGene00019029	21.0312	0.880149	0.418102	2.10511	0.0352821	0.475034
col-152	WBGene00000725	6.69218	1.87204	0.889637	2.10428	0.0353544	0.475201
rab-28	WBGene00004281	8.62358	-1.1697	0.555858	-2.10431	0.0353517	0.475201
pdfr-1	WBGene00015735	304.128	0.314308	0.149397	2.10385	0.0353918	0.4753
plpp-1.3	WBGene00008749	266.716	-0.246228	0.117128	-2.10221	0.0355346	0.476814
tre-4	WBGene00006610	88.8534	-0.482296	0.229786	-2.09889	0.0358268	0.4775
wrt-10	WBGene00006956	137.935	-0.725595	0.345703	-2.0989	0.035826	0.4775
C01G6.2	WBGene00007224	10.5666	-2.88144	1.37153	-2.1009	0.0356495	0.4775
F07D3.3	WBGene00008556	4.52873	3.43961	1.63827	2.09954	0.0357691	0.4775
F35H10.3	WBGene00018069	14.452	1.04074	0.495791	2.09914	0.0358041	0.4775
dve-1	WBGene00022861	206.578	-0.316463	0.15069	-2.10009	0.0357205	0.4775
C35A5.11	WBGene00044024	51.0279	-0.789152	0.375874	-2.09951	0.0357718	0.4775
Y77E11A.23	WBGene00235267	19.8555	-0.975953	0.464627	-2.10051	0.0356841	0.4775
wee-1.2	WBGene00006939	40.1823	-0.65214	0.311023	-2.09676	0.0360148	0.478798
skat-1	WBGene00010307	1960.26	0.111641	0.0532372	2.09705	0.0359891	0.478798
fbxb-78	WBGene00017116	12.4272	-1.54854	0.738327	-2.09736	0.0359621	0.478798
srv-1	WBGene00005712	166.324	0.243133	0.116011	2.09577	0.0361024	0.4795
T23F2.4	WBGene00020737	8.74966	1.76143	0.840587	2.09548	0.0361282	0.4795
Y39B6A.7	WBGene00012669	13.53	-0.902545	0.43089	-2.09461	0.036206	0.47973
Y92H12BR.3	WBGene00022369	4378.82	0.114824	0.054816	2.09472	0.0361958	0.47973
mfn-1	WBGene00012204	911.578	0.138997	0.0664464	2.09187	0.0364499	0.482155
C42C1.9	WBGene00016587	19.2881	1.39693	0.667695	2.09216	0.0364239	0.482155
dur-1	WBGene00001113	262.001	0.384843	0.184066	2.09079	0.0365473	0.482236
fbxa-203	WBGene00021037	115.232	-0.381604	0.182473	-2.09129	0.0365023	0.482236
F53E2.2	WBGene00302980	8970.96	0.127183	0.0608274	2.09089	0.0365381	0.482236
ggr-1	WBGene00001586	6.93835	-1.39297	0.666358	-2.09043	0.0365794	0.482257
abhd-5.1	WBGene00016506	52.7832	0.581892	0.278437	2.08985	0.0366309	0.482535
F10D2.10	WBGene00017335	87.9312	-0.514419	0.246471	-2.08714	0.0368759	0.485359
F56A4.12	WBGene00018920	20.2939	-7.43566	3.5643	-2.08615	0.0369651	0.486129
lst-1	WBGene00003083	2311.29	0.182575	0.0875944	2.08432	0.0371312	0.487518
F53A2.1	WBGene00009949	17.2052	-0.979069	0.469734	-2.08431	0.0371322	0.487518
hlh-11	WBGene00001955	671.425	0.214403	0.102947	2.08264	0.0372838	0.489103
linc-44	WBGene00219675	8.79836	2.00725	0.964172	2.08183	0.0373576	0.489666
T21D12.7	WBGene00020648	29.2228	0.992136	0.476704	2.08124	0.0374118	0.489971
F58D2.3	WBGene00044978	11.0864	-1.69734	0.815842	-2.08047	0.0374822	0.490488
wrt-1	WBGene00006947	135.88	-0.654409	0.314695	-2.0795	0.0375713	0.490506
C35A11.4	WBGene00016431	177.937	-0.29595	0.142296	-2.07982	0.0375417	0.490506
drn-1	WBGene00016911	25.5807	-0.663141	0.318903	-2.07945	0.0375764	0.490506
cyn-6	WBGene00000882	242.693	-0.360283	0.173355	-2.07829	0.0376826	0.49147
ZK546.3	WBGene00022760	5.11627	3.18118	1.53091	2.07797	0.0377124	0.49147
fbxb-102	WBGene00008847	7.26705	-1.68621	0.812305	-2.07584	0.037909	0.493627
Y57A10C.11	WBGene00044047	9.96251	-1.58976	0.766086	-2.07517	0.0379705	0.494021
C34F6.7	WBGene00007941	276.501	-0.234259	0.112968	-2.07368	0.0381089	0.494604
arrd-18	WBGene00018060	127.209	-0.361691	0.174374	-2.07422	0.0380588	0.494604
ZK973.14	WBGene00196043	2.63134	4.96625	2.39458	2.07395	0.0380836	0.494604
F37C12.1	WBGene00018149	1379.29	0.127606	0.0615627	2.07279	0.0381921	0.494874
Y52B11A.19	WBGene00206530	4.8806	2.88413	1.39135	2.0729	0.0381812	0.494874
ftn-1	WBGene00001500	22.2138	-2.53394	1.22313	-2.07169	0.0382943	0.495387
tbc-2	WBGene00022880	3802.23	0.198875	0.0959878	2.07188	0.0382768	0.495387
cct-6	WBGene00000381	7759.39	0.100279	0.04842	2.07103	0.0383556	0.495456
F55C5.10	WBGene00010098	12.4372	-1.08517	0.523995	-2.07096	0.0383621	0.495456
Y75B8A.18	WBGene00013553	412.792	-0.341254	0.164882	-2.06969	0.0384816	0.49619
ZC487.1	WBGene00022623	21.332	-0.993759	0.480091	-2.06994	0.038458	0.49619
rab-35	WBGene00004284	890.007	0.168017	0.0811984	2.06921	0.0385264	0.496197
cgef-1	WBGene00006496	666.007	0.148466	0.0717571	2.06901	0.0385448	0.496197
bli-3	WBGene00000253	447.742	0.187656	0.0908276	2.06607	0.0388222	0.498799
K07E3.1	WBGene00019490	687.442	0.305993	0.148119	2.06586	0.0388413	0.498799
M57.1	WBGene00019777	361.197	-0.205507	0.0994933	-2.06553	0.0388728	0.498799
T03G11.3	WBGene00020196	7.10393	-1.6298	0.788711	-2.0664	0.0387903	0.498799
M03A1.3	WBGene00019746	25.3897	0.666058	0.322549	2.06498	0.0389245	0.499059
ZK84.2	WBGene00022650	19.1188	-2.08606	1.01043	-2.06452	0.0389684	0.499218
cuc-1	WBGene00000835	588.108	-0.240807	0.116679	-2.06384	0.0390325	0.499634
F40H3.6	WBGene00018252	156.625	0.354075	0.171594	2.06345	0.0390704	0.499716
T19H12.6	WBGene00020590	10.9657	-1.52082	0.737224	-2.0629	0.039122	0.499973
F11C1.7	WBGene00045495	48.0912	-0.44841	0.217465	-2.06199	0.0392091	0.500683
T24A6.1	WBGene00020744	22.2539	-0.795175	0.385731	-2.06147	0.0392578	0.5009
bpl-1	WBGene00000259	962.15	0.246106	0.119447	2.06039	0.0393614	0.501154
ceh-32	WBGene00000453	198.587	-0.523734	0.254206	-2.06027	0.0393725	0.501154
F53C3.11	WBGene00018754	20.0128	-0.935783	0.454162	-2.06046	0.0393544	0.501154
zip-2	WBGene00019327	2722.75	0.246639	0.11974	2.05979	0.0394184	0.501335
Y95B8A.6	WBGene00022386	119.225	0.320468	0.155649	2.05891	0.0395026	0.502003
C34F11.8	WBGene00016417	61.9604	0.413727	0.201028	2.05806	0.0395841	0.502636
crp-1	WBGene00012532	77.1255	-0.510787	0.24832	-2.05697	0.039689	0.503564
C48D1.1	WBGene00008177	67.5761	-0.442972	0.215478	-2.05576	0.0398056	0.504639
daf-7	WBGene00000903	54.6041	-0.464076	0.225904	-2.05431	0.0399461	0.506015
T25B9.4	WBGene00012010	15.7274	3.13359	1.52587	2.05364	0.0400105	0.506086
dct-16	WBGene00012615	11593	-0.246679	0.120121	-2.05359	0.0400155	0.506086
ztf-27	WBGene00011661	178.19	0.286851	0.139784	2.05211	0.0401589	0.506771
sre-48	WBGene00012724	7.34324	2.84696	1.3873	2.05216	0.0401543	0.506771
btbd-10	WBGene00019888	2592.3	0.209638	0.102161	2.05204	0.0401656	0.506771
bath-8	WBGene00021723	8.08206	-1.19738	0.583622	-2.05164	0.0402049	0.506863
snx-3	WBGene00006503	1393.82	0.142658	0.069582	2.05022	0.0403432	0.507799
ZK858.6	WBGene00014119	3520.74	0.0973333	0.0474738	2.05026	0.0403395	0.507799
Y37A1B.7	WBGene00012540	41.104	-0.888926	0.433794	-2.04919	0.0404438	0.508661
T05E7.3	WBGene00020259	2387.55	0.151357	0.0738962	2.04824	0.0405367	0.509425
K05F1.10	WBGene00019411	97.3155	0.331305	0.161796	2.04767	0.040592	0.509716
bath-34	WBGene00012195	145.17	0.306706	0.149816	2.04722	0.0406363	0.509868
T06E6.1	WBGene00011538	1335.89	-0.109118	0.0533235	-2.04633	0.0407235	0.510154
hex-5	WBGene00013497	93.0664	-0.312483	0.152683	-2.04662	0.0406959	0.510154
Y73B6BL.23	WBGene00022244	1689.13	0.163044	0.0796955	2.04584	0.0407718	0.510356
mrps-7	WBGene00013324	567.589	-0.189864	0.0928537	-2.04476	0.0408783	0.511286
pcn-1	WBGene00003955	6885.15	0.105955	0.0518363	2.04404	0.0409498	0.511379
Y41D4B.6	WBGene00021513	43.1022	-0.730112	0.357192	-2.04403	0.0409503	0.511379
odd-2	WBGene00003846	72.3832	0.39809	0.19479	2.04368	0.0409848	0.511406
cox-15	WBGene00011526	1475.38	0.124858	0.0611184	2.04288	0.0410638	0.511587
nspe-2	WBGene00012604	15.1946	1.11657	0.54656	2.04291	0.0410611	0.511587
cnb-1	WBGene00000554	390.517	-0.205165	0.100494	-2.04156	0.0411952	0.511877
twk-25	WBGene00006678	72.1397	-0.506788	0.248309	-2.04096	0.0412546	0.511877
F43G9.8	WBGene00009670	5.14941	-2.4657	1.20826	-2.0407	0.041281	0.511877
T03F7.7	WBGene00011404	162.716	-0.360396	0.176597	-2.04078	0.0412723	0.511877
W07E6.2	WBGene00021074	843.015	-0.284881	0.139557	-2.04133	0.0412184	0.511877
linc-9	WBGene00219678	51.0058	-0.521905	0.255735	-2.0408	0.0412707	0.511877
C03B1.7	WBGene00015378	249.293	-0.198767	0.0974637	-2.03939	0.0414112	0.513091
Y38H8A.4	WBGene00012638	20.6728	2.84156	1.39357	2.03904	0.0414457	0.513117
W05F2.7	WBGene00021039	57.0657	-0.442128	0.216866	-2.03871	0.0414786	0.513124
M01E5.4	WBGene00010807	1316.98	0.109893	0.053934	2.03755	0.0415946	0.513657
R07H5.9	WBGene00011129	11.7789	-1.21273	0.595123	-2.03777	0.0415724	0.513657
ncap-1	WBGene00022453	536.761	0.165109	0.0810425	2.03731	0.041619	0.513657
scav-4	WBGene00008692	181.077	-0.32997	0.162099	-2.03561	0.0417899	0.514076
ZK822.1	WBGene00014089	67.253	-0.717541	0.352541	-2.03534	0.0418168	0.514076
fbxa-57	WBGene00016224	11.1533	1.13819	0.559053	2.03592	0.0417581	0.514076
C49A9.4	WBGene00016758	135.109	-0.282629	0.138835	-2.03571	0.0417792	0.514076
K02F6.7	WBGene00019341	717.721	0.24691	0.121246	2.03644	0.0417063	0.514076
acp-7	WBGene00022246	134.479	-0.348925	0.171459	-2.03503	0.0418475	0.514076
F58A6.9	WBGene00019026	13.38	3.14525	1.54588	2.0346	0.0418916	0.514218
F28C6.4	WBGene00009204	668.135	0.230219	0.113213	2.03351	0.0420012	0.515165
C15C7.5	WBGene00015791	465.879	0.202559	0.0996724	2.03225	0.0421283	0.516324
par-1	WBGene00003916	4098.71	0.292051	0.143807	2.03086	0.0422694	0.517077
T27F6.7	WBGene00012106	508.686	0.19589	0.0964426	2.03115	0.0422394	0.517077
mmcm-1	WBGene00014202	3633.87	0.114311	0.056292	2.03068	0.0422876	0.517077
lin-5	WBGene00002994	4020.06	-0.123734	0.0609491	-2.03011	0.042345	0.517357
sec-20	WBGene00018239	527.05	-0.161929	0.0797879	-2.02949	0.0424084	0.517357
lgc-10	WBGene00022247	19.7816	-0.707433	0.348528	-2.02978	0.0423793	0.517357
C44C10.11	WBGene00043985	68.4576	-0.449391	0.221492	-2.02893	0.0424654	0.517653
acs-14	WBGene00008669	841.821	-0.217335	0.107141	-2.0285	0.0425088	0.517785
mom-5	WBGene00003397	3735.51	0.106668	0.0526152	2.02732	0.0426298	0.518063
F42G4.6	WBGene00009643	30.7337	1.49606	0.737825	2.02766	0.0425947	0.518063
K08E3.5	WBGene00010665	10405.4	0.112866	0.0556712	2.02737	0.0426243	0.518063
flp-32	WBGene00010982	23.8831	-0.717278	0.353967	-2.0264	0.0427238	0.518807
Y45F10D.2	WBGene00012883	13.1294	0.984073	0.485842	2.0255	0.0428159	0.519152
ZK265.7	WBGene00013959	34.7404	-0.627876	0.309988	-2.02548	0.0428177	0.519152
sptl-1	WBGene00016020	2869.11	-0.113027	0.0558319	-2.02441	0.042928	0.519694
Y54G2A.76	WBGene00235268	27.639	-0.973733	0.48098	-2.02448	0.0429211	0.519694
F56C9.7	WBGene00018951	1199.09	-0.246373	0.121729	-2.02394	0.0429763	0.519882
C24B5.1	WBGene00016044	10.6875	-0.938474	0.463972	-2.02269	0.0431047	0.52064
trhr-1	WBGene00016265	65.1843	0.625088	0.309019	2.02281	0.0430923	0.52064
C54G4.2	WBGene00008312	18.101	-2.81116	1.39018	-2.02215	0.0431611	0.520924
F45E1.4	WBGene00018465	112.816	0.481379	0.23819	2.02099	0.0432811	0.521976
C13E3.1	WBGene00015740	65.8159	-0.634402	0.314028	-2.02021	0.0433619	0.522552
T04H1.2	WBGene00011449	5145.9	0.107823	0.053384	2.01976	0.0434081	0.522712
Y40B1B.7	WBGene00012739	940.209	-0.193331	0.0957509	-2.0191	0.0434769	0.523143
T22C1.3	WBGene00011914	1141.09	0.14229	0.07054	2.01716	0.0436791	0.523984
C26B2.2	WBGene00016125	11.6326	2.24232	1.11138	2.0176	0.0436332	0.523984
dagl-2	WBGene00018364	2521.99	0.12543	0.06217	2.01753	0.0436405	0.523984
F52G3.6	WBGene00219964	5.34914	-4.03229	1.9987	-2.01746	0.0436478	0.523984
cyp-32B1	WBGene00021167	15.888	-1.31149	0.650374	-2.01651	0.0437469	0.5244
F21F3.6	WBGene00017675	3729.66	0.115409	0.0572418	2.01616	0.0437835	0.524442
C03B1.14	WBGene00015382	70.1011	0.416373	0.206642	2.01495	0.0439103	0.525392
R07C12.3	WBGene00019933	5.15213	-2.819	1.39917	-2.01477	0.0439291	0.525392
nol-9	WBGene00010709	721.784	0.217565	0.108019	2.01413	0.0439957	0.525792
C05E7.3	WBGene00007345	6.14374	-1.3198	0.656536	-2.01025	0.0444046	0.529082
rga-5	WBGene00010374	169.006	0.365399	0.181714	2.01085	0.0443412	0.529082
sdz-21	WBGene00018828	41.9546	-0.641985	0.319234	-2.01102	0.0443234	0.529082
F55F8.8	WBGene00018896	4.4712	1.84007	0.915258	2.01044	0.0443848	0.529082
C47F8.1	WBGene00008157	75.4806	-0.394286	0.196359	-2.00799	0.0446446	0.530136
Y73F8A.13	WBGene00013522	103.902	-0.408155	0.203268	-2.00797	0.0446469	0.530136
fust-1	WBGene00016173	2942.5	-0.143471	0.0714363	-2.00837	0.0446036	0.530136
F14B8.6	WBGene00017448	162.285	-0.294595	0.146722	-2.00784	0.0446603	0.530136
oig-8	WBGene00020582	11.2483	-1.02401	0.509793	-2.00868	0.0445712	0.530136
C14A4.6	WBGene00007557	93.7479	-0.368386	0.183513	-2.00741	0.044706	0.530175
C39B10.3	WBGene00008023	4.36159	-1.874	0.93391	-2.00662	0.0447903	0.530175
K08D8.6	WBGene00010660	865.239	-0.362225	0.180538	-2.00636	0.0448174	0.530175
ZK836.3	WBGene00014099	14.9228	-1.08405	0.540338	-2.00624	0.0448308	0.530175
lido-16	WBGene00020898	10.4245	2.82267	1.40685	2.00637	0.0448165	0.530175
bli-4	WBGene00000254	4616.59	0.153708	0.0766391	2.0056	0.0448985	0.530447
toca-1	WBGene00017298	460.411	0.327726	0.163422	2.0054	0.0449208	0.530447
hacd-1	WBGene00019978	560.429	-0.31546	0.157345	-2.00489	0.0449745	0.530686
F58G1.7	WBGene00010269	81.0915	0.503369	0.251199	2.00387	0.0450845	0.531588
prk-2	WBGene00004183	110.606	0.358447	0.178975	2.00278	0.0452009	0.531773
EEED8.2	WBGene00017133	110.633	-0.626935	0.312997	-2.00301	0.0451767	0.531773
ccpp-1	WBGene00018995	1974.18	0.142912	0.0713371	2.00333	0.0451415	0.531773
cln-3.2	WBGene00000540	280.849	0.203418	0.101696	2.00026	0.0454723	0.532461
catp-4	WBGene00007248	106.445	1.08854	0.544186	2.00031	0.0454666	0.532461
T04F8.2	WBGene00011441	580.848	-0.177311	0.0886171	-2.00086	0.0454071	0.532461
T26C5.3	WBGene00012033	2165.29	0.0979851	0.0489464	2.00189	0.045297	0.532461
nhr-247	WBGene00014193	88.4726	1.94664	0.972681	2.00131	0.0453586	0.532461
K08B12.1	WBGene00019520	62.3	-0.910903	0.45544	-2.00005	0.0454946	0.532461
W03F9.11	WBGene00044512	8.01548	-1.22484	0.612266	-2.0005	0.0454462	0.532461
ced-3	WBGene00000417	4189.06	0.169982	0.0850452	1.99872	0.0456384	0.533027
F20G2.2	WBGene00008986	312.099	-0.214082	0.107128	-1.99837	0.0456764	0.533027
M02B1.3	WBGene00010828	3189.31	0.210034	0.105103	1.99836	0.0456774	0.533027
F19C6.8	WBGene00194847	11.6715	1.03325	0.516993	1.99857	0.0456554	0.533027
nhr-117	WBGene00003707	29.3974	0.57976	0.290334	1.99687	0.045839	0.534125
gsp-3	WBGene00021113	105.372	2.02496	1.01399	1.99703	0.0458223	0.534125
egl-38	WBGene00001204	18.5872	-0.863341	0.432803	-1.99477	0.0460682	0.535426
Y57A10B.6	WBGene00013278	57.5568	-0.506672	0.254001	-1.99477	0.0460682	0.535426
C18B10.6	WBGene00015963	4.52024	1.54603	0.774926	1.99507	0.0460357	0.535426
lido-15	WBGene00018804	56.5606	0.512103	0.256744	1.99461	0.0460858	0.535426
mpz-5	WBGene00011241	12.5209	1.83631	0.92144	1.99287	0.0462762	0.535845
T09F3.2	WBGene00011662	3004.65	0.11964	0.0600383	1.99273	0.0462909	0.535845
Y105C5A.15	WBGene00013639	171.648	0.328386	0.164746	1.99329	0.0462292	0.535845
K10C2.7	WBGene00019622	36.3076	-0.692952	0.34754	-1.99388	0.0461654	0.535845
ZK185.3	WBGene00022683	137.7	-0.288549	0.144768	-1.99318	0.0462421	0.535845
lgc-47	WBGene00009799	31.094	-0.697574	0.350184	-1.99202	0.0463688	0.536355
T24E12.13	WBGene00195077	8.30632	-1.19596	0.600713	-1.9909	0.0464919	0.537387
C30G12.6	WBGene00016277	1573.21	-0.127088	0.0638444	-1.99059	0.046526	0.537389
lips-5	WBGene00011725	36.1635	0.741217	0.372438	1.99018	0.0465716	0.537524
fbxa-180	WBGene00009295	29.0589	-0.6472	0.325596	-1.98774	0.0468407	0.540237
K10D11.5	WBGene00010749	186.758	0.389014	0.195775	1.98704	0.0469175	0.540383
ztf-22	WBGene00012988	486.03	0.36631	0.184353	1.98701	0.0469216	0.540383
E04F6.10	WBGene00017129	8.52262	-1.33573	0.672458	-1.98634	0.0469952	0.540444
nhr-201	WBGene00019741	22.9457	-0.697288	0.351031	-1.9864	0.0469892	0.540444
best-13	WBGene00009323	169.37	-0.308824	0.15557	-1.98511	0.0471327	0.540931
B0416.7	WBGene00015182	24.6601	-0.72839	0.366828	-1.98565	0.0470725	0.540931
fbxb-30	WBGene00018458	6.57926	-1.45274	0.731845	-1.98504	0.0471399	0.540931
snrp-40.2	WBGene00015974	678.128	0.12919	0.0650992	1.98451	0.0471988	0.541215
cyn-8	WBGene00000884	502.665	-0.306872	0.155031	-1.97942	0.0477687	0.541869
haf-6	WBGene00001816	735.127	-0.455411	0.229714	-1.98251	0.0474217	0.541869
his-18	WBGene00001892	3.69555	-2.85682	1.44256	-1.98038	0.0476612	0.541869
F21D9.1	WBGene00009015	7.33432	-1.33866	0.675577	-1.98151	0.0475346	0.541869
F46A9.1	WBGene00009754	10.5518	2.77126	1.40002	1.97944	0.0477667	0.541869
ssp-35	WBGene00010091	20.8532	-2.78873	1.40779	-1.98093	0.0475996	0.541869
ttr-23	WBGene00011894	17.5529	0.933234	0.471381	1.97979	0.0477274	0.541869
lpr-4	WBGene00012257	115.287	-0.770296	0.388465	-1.98292	0.0473758	0.541869
grsp-1	WBGene00012840	54.3182	0.614609	0.310258	1.98096	0.0475959	0.541869
tbc-17	WBGene00012894	1489.05	0.231043	0.116575	1.98193	0.0474873	0.541869
B0353.1	WBGene00015155	395.017	0.195019	0.0984898	1.98009	0.0476934	0.541869
C34B2.9	WBGene00016394	23.087	0.686687	0.346775	1.98021	0.0476803	0.541869
ast-1	WBGene00020368	36.8659	-0.705199	0.355953	-1.98116	0.0475734	0.541869
T09B4.8	WBGene00020382	629.968	-0.248701	0.125498	-1.98171	0.0475119	0.541869
#N/A	WBGene00305981	14.7906	0.903441	0.456375	1.9796	0.0477484	0.541869
vab-23	WBGene00014153	54.5121	-0.639139	0.32295	-1.97907	0.0478086	0.541934
npr-14	WBGene00012275	6.28289	1.5247	0.770561	1.97869	0.0478515	0.542032
cest-1	WBGene00011362	13.4505	1.60099	0.809389	1.97803	0.0479258	0.542099
perm-4	WBGene00016638	19941.9	0.206704	0.104491	1.9782	0.0479061	0.542099
coq-4	WBGene00000764	240.002	-0.224234	0.113389	-1.97756	0.0479783	0.542305
Y39B6A.33	WBGene00012692	1586.29	-0.119653	0.0605519	-1.97604	0.0481507	0.543372
clec-180	WBGene00017991	61.6795	-0.779301	0.394331	-1.97626	0.0481251	0.543372
F40H3.1	WBGene00018249	312.412	0.283505	0.143487	1.97582	0.0481755	0.543372
haf-2	WBGene00001812	2781.04	0.217708	0.110229	1.97506	0.0482616	0.543955
scpl-1	WBGene00007054	1560.97	0.173683	0.0879615	1.97454	0.0483207	0.544232
F49D11.3	WBGene00018627	4.98917	-1.40381	0.711065	-1.97424	0.0483548	0.544232
T24C12.3	WBGene00020765	300.34	-0.225762	0.114382	-1.97376	0.0484091	0.544457
F21D9.6	WBGene00009020	14.8457	-1.16686	0.591502	-1.9727	0.0485297	0.545425
psr-1	WBGene00004205	1393.81	0.120872	0.0613262	1.97096	0.0487283	0.546882
mms-19	WBGene00016060	1969.66	0.114409	0.0580455	1.97102	0.0487218	0.546882
nhr-1	WBGene00003600	622.821	0.230439	0.116959	1.97026	0.0488086	0.547396
ins-3	WBGene00002086	11.7268	-0.955169	0.485452	-1.96759	0.0491154	0.54949
F15D4.2	WBGene00008859	325.82	0.240664	0.122299	1.96783	0.0490879	0.54949
ZK829.7	WBGene00014096	2724.85	0.15348	0.0780107	1.96743	0.0491341	0.54949
C54E4.12	WBGene00235274	3.79774	1.88985	0.960439	1.9677	0.0491028	0.54949
K10D3.6	WBGene00010740	10.9812	-0.884502	0.449699	-1.96687	0.0491978	0.549815
F48C1.8	WBGene00018600	5.61669	-2.34185	1.19108	-1.96616	0.0492806	0.550353
F21D5.9	WBGene00009014	11.0427	-1.41834	0.722011	-1.96443	0.0494808	0.552198
imb-1	WBGene00002075	3713.74	0.155641	0.0792421	1.96412	0.049516	0.552203
Y76B12C.11	WBGene00220211	5.44262	-5.36081	2.7309	-1.96302	0.0496438	0.553238
T09B4.5	WBGene00020379	1137.37	-0.440455	0.224415	-1.96268	0.0496833	0.55329
ddl-2	WBGene00013000	553.963	0.341038	0.174021	1.95976	0.0500244	0.555916
Y50E8A.1	WBGene00013046	24.4737	0.739379	0.377199	1.96018	0.0499742	0.555916
T26C12.1	WBGene00020831	2644.29	0.156493	0.0798467	1.95992	0.0500057	0.555916
dnpp-1	WBGene00017163	1943.09	0.114907	0.0586692	1.95856	0.0501642	0.557079
trp-1	WBGene00006614	16.1978	-0.748056	0.382052	-1.958	0.0502303	0.557423
mtx-1	WBGene00009559	1937.06	0.167636	0.085656	1.95708	0.0503379	0.557446
H14A12.3	WBGene00019196	1136.19	0.204497	0.104475	1.95738	0.0503033	0.557446
ctsa-2	WBGene00021503	739.453	-0.245137	0.125245	-1.95725	0.0503178	0.557446
tcab-1	WBGene00013669	1071.03	0.131909	0.0674862	1.9546	0.0506297	0.560286
C06C3.9	WBGene00014668	7.81951	-1.33735	0.684525	-1.95369	0.0507383	0.561095
fars-3	WBGene00001498	3242.39	0.121506	0.0622212	1.95281	0.0508416	0.561846
srd-75	WBGene00044099	3.46094	2.0776	1.06473	1.95129	0.0510228	0.563456
odr-2	WBGene00003849	15.0408	-0.914011	0.468723	-1.95	0.0511758	0.564358
mrps-35	WBGene00012697	1572.95	-0.141852	0.0727432	-1.95003	0.0511721	0.564358
rap-1	WBGene00004307	2269.74	0.25997	0.133462	1.9479	0.0514268	0.566339
fath-1	WBGene00007707	2167.55	0.116727	0.0599214	1.948	0.0514147	0.566339
gyg-1	WBGene00006863	1070.47	0.259393	0.133276	1.94629	0.0516198	0.568069
C13F10.6	WBGene00015745	1764.47	0.126646	0.0650858	1.94583	0.0516753	0.568284
vhl-1	WBGene00006922	113.38	-0.293291	0.150814	-1.94472	0.0518092	0.568467
F59F3.6	WBGene00010335	9.19724	-1.24463	0.639946	-1.9449	0.0517871	0.568467
ZK637.12	WBGene00014029	26.178	-1.61418	0.830122	-1.94451	0.0518341	0.568467
zig-10	WBGene00020800	22.5675	-0.977544	0.502723	-1.9445	0.0518354	0.568467
F58D2.2	WBGene00010241	53.2545	-1.71498	0.882105	-1.94419	0.051872	0.568476
F09F9.2	WBGene00017307	38.5691	-0.702289	0.361373	-1.94339	0.0519689	0.569143
clh-6	WBGene00000533	1229.75	0.144462	0.0743612	1.94271	0.0520511	0.56965
sri-5	WBGene00005517	6.14851	1.64996	0.849767	1.94166	0.0521782	0.56986
Y48B6A.13	WBGene00012984	492.559	0.201893	0.103954	1.94214	0.0521198	0.56986
W03F9.4	WBGene00021002	116.096	-0.526599	0.271202	-1.94172	0.0521712	0.56986
elo-2	WBGene00001240	2360.57	-0.165491	0.0853313	-1.9394	0.0524531	0.570113
hlh-3	WBGene00001950	51.4871	-0.566863	0.29225	-1.93965	0.0524224	0.570113
lem-3	WBGene00002276	2392.97	0.20782	0.107115	1.94016	0.0523605	0.570113
srw-44	WBGene00005791	3.2681	2.82243	1.45446	1.94053	0.0523159	0.570113
Y37H2A.1	WBGene00012562	1111.7	0.146843	0.0756937	1.93996	0.052384	0.570113
F31D5.1	WBGene00017944	17.745	0.684624	0.352858	1.94023	0.0523522	0.570113
W08F4.13	WBGene00044733	11.4742	-1.33933	0.690511	-1.93963	0.0524251	0.570113
F14B6.6	WBGene00008787	25.0176	-0.62835	0.324074	-1.93891	0.0525119	0.570361
sto-5	WBGene00006067	73.2822	0.426147	0.219878	1.93811	0.0526104	0.571039
fbxb-16	WBGene00022560	6.47771	-1.40356	0.724417	-1.93751	0.0526833	0.571439
zipt-11	WBGene00019077	1321.1	0.118492	0.0612142	1.93569	0.0529052	0.573453
B0205.9	WBGene00015023	1663.55	0.116649	0.0602973	1.93456	0.0530445	0.57457
C03C10.5	WBGene00007271	21.1825	-1.17191	0.606061	-1.93365	0.0531557	0.575381
nphp-4	WBGene00011261	29.6428	-0.69843	0.361976	-1.92949	0.05367	0.580552
ost-1	WBGene00003893	5683.72	0.197635	0.10249	1.92834	0.0538128	0.5817
mec-2	WBGene00003166	68.0674	-0.443234	0.229892	-1.92801	0.0538543	0.581751
ZK154.1	WBGene00022665	32.6537	-0.976508	0.506937	-1.92629	0.054068	0.583662
F19B10.4	WBGene00017586	6.65647	-1.55512	0.807581	-1.92566	0.0541474	0.584122
T23E1.2	WBGene00020729	101.557	0.372402	0.193448	1.92508	0.0542196	0.584502
sqv-6	WBGene00005024	2239.52	0.170388	0.0885814	1.92352	0.0544149	0.584919
C34C12.9	WBGene00007928	98.7105	0.337503	0.175445	1.9237	0.0543926	0.584919
igeg-2	WBGene00009842	56.8963	0.613617	0.319071	1.92314	0.0544625	0.584919
wdr-5.2	WBGene00010572	112.143	-0.313508	0.16308	-1.92241	0.0545536	0.584919
Y75B8A.25	WBGene00013558	1426.12	0.193179	0.100483	1.9225	0.0545427	0.584919
C05D11.1	WBGene00015481	4151.69	0.121531	0.0631931	1.92317	0.0544586	0.584919
jmjc-1	WBGene00020902	172.336	-0.382121	0.19865	-1.92358	0.0544068	0.584919
Y55B1BR.2	WBGene00021912	321.843	0.358728	0.186584	1.92261	0.0545293	0.584919
adm-2	WBGene00000074	644.921	0.211456	0.110094	1.9207	0.0547701	0.585655
B0024.11	WBGene00007101	1813.46	-0.128138	0.0667014	-1.92106	0.0547238	0.585655
osta-3	WBGene00012182	952.091	0.254179	0.132335	1.92072	0.0547671	0.585655
ZK1128.1	WBGene00014227	694.12	-0.154764	0.0805509	-1.92132	0.054692	0.585655
2L52.1	WBGene00007063	215.466	-0.381026	0.198491	-1.91962	0.0549064	0.586717
T14G10.8	WBGene00011777	127.092	0.387487	0.201979	1.91845	0.0550535	0.587893
hmg-6	WBGene00009827	3.43415	-1.78333	0.93008	-1.9174	0.0551877	0.588929
Y39B6A.30	WBGene00012689	43.3903	-1.9598	1.02348	-1.91483	0.0555143	0.592015
tbx-8	WBGene00006545	27.7173	-0.866476	0.452787	-1.91365	0.0556648	0.592677
alh-13	WBGene00011938	466.475	-0.249107	0.130181	-1.91355	0.0556781	0.592677
Y51H4A.1	WBGene00013098	11.7467	-1.22561	0.640517	-1.91347	0.0556885	0.592677
F53F4.4	WBGene00009988	33.9695	0.711199	0.372048	1.91158	0.0559301	0.594488
C09D4.9	WBGene00206357	5.90268	1.90259	0.99531	1.91155	0.0559337	0.594488
him-14	WBGene00001872	914.309	0.133656	0.0699532	1.91065	0.0560493	0.594521
C35C5.8	WBGene00007957	51.3422	0.414579	0.216948	1.91096	0.0560096	0.594521
Y50D4A.5	WBGene00021739	78.8576	-0.392436	0.205393	-1.91066	0.0560484	0.594521
hsp-43	WBGene00002024	2307.5	0.226994	0.118869	1.90961	0.0561829	0.594743
pkn-1	WBGene00009793	1493.04	0.301776	0.158021	1.90972	0.0561698	0.594743
R160.2	WBGene00020119	5.39568	2.43137	1.27312	1.90977	0.0561628	0.594743
F37D6.3	WBGene00009509	4.37169	-2.10104	1.10154	-1.90737	0.0564733	0.597019
F44E5.3	WBGene00009690	9.12985	-1.55679	0.816183	-1.9074	0.0564689	0.597019
gln-3	WBGene00001604	3258.81	0.322065	0.168972	1.90602	0.0566472	0.597125
inx-15	WBGene00002137	353.796	-0.259052	0.135874	-1.90656	0.056577	0.597125
C35D6.4	WBGene00007961	13.6197	-0.777152	0.40781	-1.90567	0.0566926	0.597125
C50F2.5	WBGene00016839	21.3483	-2.81008	1.47468	-1.90554	0.0567093	0.597125
tat-4	WBGene00020784	294.071	0.218724	0.114726	1.90649	0.0565864	0.597125
Y71G12B.28	WBGene00022163	8.75257	-1.85324	0.972366	-1.9059	0.0566627	0.597125
nlp-29	WBGene00003767	116.07	-0.389382	0.204421	-1.90481	0.0568052	0.597737
F48E8.3	WBGene00018610	1536.38	0.103467	0.0543431	1.90395	0.0569161	0.598507
arx-3	WBGene00000201	1781.9	0.0938103	0.0493424	1.90121	0.0572743	0.600727
spin-3	WBGene00008598	36.4463	-0.744309	0.391482	-1.90126	0.0572682	0.600727
istr-1	WBGene00010736	2946.88	0.181276	0.095352	1.90113	0.0572854	0.600727
Y23H5B.1	WBGene00021272	19.4178	-0.697332	0.366798	-1.90113	0.0572844	0.600727
linc-109	WBGene00219615	4.16634	2.01236	1.05864	1.90089	0.0573168	0.600727
nhr-126	WBGene00003716	48.2961	0.38461	0.202536	1.89898	0.0575677	0.602316
R08B4.3	WBGene00011139	141.837	-0.338257	0.178137	-1.89886	0.0575825	0.602316
Y38C1AB.5	WBGene00021407	11.5015	6.79885	3.57946	1.8994	0.0575113	0.602316
K10D3.4	WBGene00010738	269.526	-0.569791	0.300145	-1.89838	0.0576458	0.602581
K10D11.6	WBGene00010750	59.1724	-0.342415	0.180531	-1.8967	0.0578671	0.604496
ZC196.5	WBGene00022549	66.1676	0.414919	0.218978	1.8948	0.0581192	0.606729
C14A4.9	WBGene00007560	28.0915	-0.859517	0.453721	-1.89437	0.0581753	0.606915
T21B10.4	WBGene00011886	1815.78	0.111976	0.059154	1.89296	0.058363	0.607818
Y53F4B.10	WBGene00013157	13.1272	1.37074	0.724164	1.89286	0.0583769	0.607818
acdh-4	WBGene00020419	47.0628	-0.764657	0.403888	-1.89324	0.058326	0.607818
col-99	WBGene00000674	98.9089	-0.527883	0.279079	-1.89151	0.0585557	0.60928
frpr-9	WBGene00009965	7.31747	0.976068	0.516284	1.89057	0.0586824	0.609397
C16A11.3	WBGene00015816	391.705	0.216297	0.114393	1.89083	0.0586465	0.609397
C24H12.7	WBGene00016076	10.8795	-1.65418	0.874706	-1.89112	0.058608	0.609397
sup-26	WBGene00006331	1865.53	-0.448777	0.237493	-1.88964	0.0588055	0.610063
gcst-1	WBGene00017765	1552.2	-0.11248	0.0595458	-1.88896	0.058897	0.610063
Y71F9AL.1	WBGene00022107	699.863	0.167094	0.0884594	1.88894	0.0589005	0.610063
K04C2.7	WBGene00044311	7.92102	1.28165	0.678503	1.88894	0.0588999	0.610063
F13H8.6	WBGene00017439	7.97891	1.16971	0.619646	1.88771	0.059065	0.611367
tbx-33	WBGene00006552	154.564	-0.271011	0.143657	-1.88651	0.0592264	0.612113
sulp-5	WBGene00010789	23.1856	-0.664462	0.352266	-1.88625	0.0592611	0.612113
C50C3.1	WBGene00016799	1403.94	0.168892	0.0895493	1.88603	0.0592916	0.612113
Y39A3CL.3	WBGene00021441	285.392	-0.251512	0.133313	-1.88662	0.0592116	0.612113
rpn-7	WBGene00004463	6429.26	0.0956722	0.0507533	1.88504	0.0594239	0.613079
F13D12.8	WBGene00008742	38.1683	-0.53814	0.28571	-1.88352	0.0596298	0.614404
Y61A9LA.11	WBGene00022022	415.544	0.169862	0.0901779	1.88364	0.0596142	0.614404
ooc-3	WBGene00003868	1609.3	0.10186	0.0540943	1.88301	0.0596991	0.614718
nfm-1	WBGene00003593	344.179	0.199318	0.105895	1.88223	0.0598054	0.615168
T01B7.9	WBGene00011314	10.1451	0.954277	0.507178	1.88154	0.059898	0.615168
H27M09.5	WBGene00019248	45.95	1.6853	0.895538	1.88189	0.0598513	0.615168
K06A1.2	WBGene00019425	7.25329	3.01566	1.60256	1.88178	0.0598661	0.615168
che-11	WBGene00000490	25.0622	-0.767576	0.408738	-1.87792	0.0603924	0.618514
bath-43	WBGene00011815	1782.24	0.146191	0.0778469	1.87793	0.060391	0.618514
ZK858.8	WBGene00014121	25.1284	1.38295	0.736504	1.87772	0.060419	0.618514
T01B10.5	WBGene00020137	7.0933	-1.28428	0.68355	-1.87884	0.0602659	0.618514
C45B11.6	WBGene00045379	20.3075	-0.907355	0.483015	-1.87852	0.0603098	0.618514
chk-2	WBGene00000499	413.086	-0.224623	0.11977	-1.87546	0.0607296	0.619155
msp-19	WBGene00003426	144.172	-2.50017	1.33317	-1.87536	0.0607433	0.619155
tbx-32	WBGene00006551	5.72225	-1.29431	0.690261	-1.87511	0.0607781	0.619155
Y53F4B.19	WBGene00013165	31.4621	-1.47319	0.785271	-1.87603	0.0606512	0.619155
Y54E2A.8	WBGene00013193	939.209	0.156118	0.0832353	1.87562	0.060707	0.619155
irld-23	WBGene00016271	4.4831	-1.62832	0.868571	-1.87471	0.0608332	0.619155
F43E2.6	WBGene00018394	35.5535	0.835458	0.445181	1.87667	0.0605632	0.619155
F53A9.7	WBGene00018730	33.1909	0.788215	0.420066	1.87641	0.0605991	0.619155
F36H5.13	WBGene00206519	16.5836	-1.08403	0.578188	-1.87488	0.0608088	0.619155
gfat-1	WBGene00008546	10374.8	0.212135	0.113208	1.87384	0.060952	0.619966
ver-1	WBGene00006894	14.2097	-0.988477	0.527925	-1.87238	0.0611537	0.620765
oac-18	WBGene00009230	4.94047	1.61042	0.859825	1.87296	0.0610736	0.620765
Y53F4B.11	WBGene00013158	16.5823	2.01934	1.07834	1.87265	0.0611169	0.620765
gen-1	WBGene00020442	2153.8	0.10931	0.0583875	1.87214	0.0611873	0.620765
acr-7	WBGene00000046	6.03222	-1.56044	0.833828	-1.87142	0.0612866	0.621374
F22E5.20	WBGene00017713	23.146	-0.798789	0.42694	-1.87097	0.0613499	0.621619
nos-1	WBGene00003783	883.169	0.253083	0.135394	1.86922	0.0615916	0.623669
gld-3	WBGene00001597	7911.39	0.115898	0.0620445	1.86798	0.0617653	0.625028
alh-1	WBGene00000107	5091.69	0.123209	0.06629	1.85864	0.0630778	0.6263
col-52	WBGene00000629	14.7212	2.56502	1.37774	1.86176	0.0626368	0.6263
fkb-4	WBGene00001429	26.7299	-0.668846	0.358454	-1.86592	0.0620529	0.6263
hsp-12.6	WBGene00002013	27.8159	0.789209	0.424104	1.86089	0.0627601	0.6263
jnk-1	WBGene00002178	46.0369	-0.502374	0.270232	-1.85905	0.0630207	0.6263
mlk-1	WBGene00003374	446.418	0.296597	0.159516	1.85936	0.0629759	0.6263
oma-1	WBGene00003864	6492.06	0.0956823	0.0513621	1.8629	0.0624767	0.6263
tbp-1	WBGene00006542	1924.85	0.12742	0.0685509	1.85876	0.0630613	0.6263
vap-1	WBGene00006886	78.9172	0.336992	0.181192	1.85986	0.0629054	0.6263
F32A11.4	WBGene00009309	6.17165	1.63873	0.878606	1.86515	0.0621611	0.6263
clp-8	WBGene00009695	11.9778	2.82536	1.51649	1.86309	0.0624503	0.6263
myo-6	WBGene00009730	80.8779	0.343639	0.1847	1.86052	0.0628114	0.6263
F49E12.8	WBGene00009901	6.17357	-1.45721	0.782739	-1.86168	0.0626486	0.6263
K07A1.6	WBGene00010613	159.8	-0.351726	0.189142	-1.85959	0.0629441	0.6263
M03C11.6	WBGene00010843	171.749	0.2109	0.113246	1.86231	0.0625592	0.6263
T03F6.6	WBGene00011401	39.1732	2.7741	1.48885	1.86324	0.0624279	0.6263
T19B10.2	WBGene00011831	485.775	-0.312678	0.168165	-1.85935	0.0629773	0.6263
ZC116.3	WBGene00013855	150.094	-0.429944	0.231138	-1.86012	0.0628691	0.6263
puf-12	WBGene00014165	4272.3	-0.117834	0.0633659	-1.85957	0.062946	0.6263
math-21	WBGene00016556	4.90025	-1.98851	1.0672	-1.86329	0.0624209	0.6263
F09F7.5	WBGene00017302	293.77	0.338884	0.181564	1.86647	0.061976	0.6263
acs-11	WBGene00018269	1217.01	0.219915	0.117898	1.86529	0.062141	0.6263
M04F3.2	WBGene00019768	156.927	0.299659	0.161047	1.86069	0.0627883	0.6263
R119.2	WBGene00020088	626.931	0.144374	0.0776701	1.85882	0.0630533	0.6263
Y37E11B.5	WBGene00021377	699.254	0.20819	0.111946	1.85973	0.0629235	0.6263
Y73E7A.8	WBGene00022274	60.4602	-0.651649	0.349927	-1.86224	0.0625687	0.6263
ZK185.2	WBGene00022682	22.0579	0.70015	0.375911	1.86254	0.0625271	0.6263
ZK686.3	WBGene00022793	3302.94	0.0868914	0.0466952	1.86082	0.0627693	0.6263
R02E4.3	WBGene00044724	30.3041	1.07002	0.575785	1.85837	0.0631161	0.6263
Y50D4A.6	WBGene00195169	14.9726	1.08487	0.582573	1.86221	0.0625733	0.6263
B0416.11	WBGene00206483	7.46208	-1.0678	0.573115	-1.86316	0.0624403	0.6263
Y74C9A.9	WBGene00235381	22.4452	0.594339	0.319872	1.85805	0.0631615	0.626358
Y47D3B.3	WBGene00012940	4.82073	-1.67861	0.904714	-1.85541	0.0635382	0.629699
dlat-1	WBGene00009082	5767.48	0.108626	0.0585572	1.85504	0.0635908	0.629827
bir-2	WBGene00000250	815.258	0.150422	0.0811578	1.85345	0.0638185	0.630515
C54D10.9	WBGene00008303	3.97272	-2.66256	1.43689	-1.853	0.0638823	0.630515
F10A3.4	WBGene00008634	57.0649	-0.588607	0.317718	-1.85261	0.0639387	0.630515
F54C8.4	WBGene00010037	2659.18	-0.115441	0.0622998	-1.853	0.0638826	0.630515
Y75B8A.16	WBGene00013551	656.369	0.127293	0.0686831	1.85334	0.0638332	0.630515
F11G11.4	WBGene00017384	15.6983	2.65995	1.43506	1.85355	0.063803	0.630515
bbs-4	WBGene00043992	18.6543	-0.824207	0.444836	-1.85284	0.0639059	0.630515
Y58A7A.1	WBGene00021975	160.451	-0.322509	0.174149	-1.85192	0.0640374	0.631095
C48E7.1	WBGene00016749	392.803	-0.260068	0.140519	-1.85077	0.0642027	0.632251
R173.3	WBGene00020125	11.9411	-1.09072	0.589402	-1.85055	0.0642345	0.632251
snf-5	WBGene00004904	122.934	-1.24192	0.671659	-1.84903	0.0644531	0.63283
F47D12.3	WBGene00018560	9.49388	-0.902495	0.488036	-1.84924	0.0644234	0.63283
tofu-7	WBGene00022737	667.48	-0.157743	0.085288	-1.84954	0.06438	0.63283
ZK783.3	WBGene00022818	3.6883	2.61691	1.41488	1.84956	0.0643774	0.63283
lab-1	WBGene00007278	629.284	-0.20174	0.109165	-1.84803	0.0645976	0.633072
cutl-15	WBGene00011888	31.921	-0.500259	0.270686	-1.84811	0.0645858	0.633072
emc-3	WBGene00013378	1475.66	0.0824676	0.0446235	1.84808	0.0645914	0.633072
nlt-1	WBGene00003773	524.286	-0.203742	0.110277	-1.84755	0.0646675	0.633366
F54H12.8	WBGene00045247	11.9262	2.05705	1.11373	1.84699	0.0647481	0.633763
osm-12	WBGene00003892	11.8125	-0.921183	0.499127	-1.84559	0.0649518	0.634191
pph-4.1	WBGene00004085	1088.29	0.1473	0.079778	1.84637	0.0648386	0.634191
rgs-3	WBGene00004346	18.739	-0.668169	0.36195	-1.84602	0.0648889	0.634191
lmd-3	WBGene00018700	6205.21	0.131062	0.071009	1.84571	0.0649338	0.634191
lpr-6	WBGene00012255	129.748	-0.722106	0.391541	-1.84426	0.0651446	0.635681
akt-2	WBGene00000103	188.664	0.238935	0.129778	1.8411	0.0656063	0.635912
pbs-2	WBGene00003948	3532.3	0.110506	0.0599833	1.84228	0.0654348	0.635912
unc-94	WBGene00006823	1784.36	0.135808	0.0737627	1.84115	0.0655995	0.635912
F01D5.5	WBGene00008495	59.119	-0.593736	0.322159	-1.84299	0.0653303	0.635912
H08M01.1	WBGene00010373	14.6067	2.78352	1.51141	1.84167	0.0655232	0.635912
K11H3.5	WBGene00010782	11.3084	-0.970103	0.526487	-1.8426	0.0653878	0.635912
Y59A8B.21	WBGene00013353	788.703	0.173615	0.0942542	1.84199	0.0654766	0.635912
egas-3	WBGene00013480	18.4906	0.748187	0.405837	1.84356	0.0652469	0.635912
F42C5.4	WBGene00018346	30.6801	-0.468882	0.254678	-1.84108	0.0656097	0.635912
K11H12.11	WBGene00044723	9.42916	-1.26776	0.688122	-1.84235	0.0654238	0.635912
linc-4	WBGene00219306	37.1793	-0.572929	0.310976	-1.84236	0.0654232	0.635912
F54C1.8	WBGene00018792	8.34782	2.78698	1.5143	1.84045	0.0657029	0.636427
atl-1	WBGene00000226	3658.22	-0.114365	0.0622627	-1.83682	0.0662368	0.638808
glp-4	WBGene00006936	6921.66	0.10936	0.0596537	1.83325	0.0667659	0.638808
dmd-6	WBGene00007058	732.185	0.257851	0.14048	1.8355	0.0664321	0.638808
eif-2Bdelta	WBGene00008670	2013.53	0.0934066	0.0509029	1.835	0.0665061	0.638808
F31D4.8	WBGene00009293	62.0204	0.380184	0.20692	1.83735	0.0661579	0.638808
H40L08.1	WBGene00010433	605.194	-0.192872	0.105086	-1.83536	0.0664517	0.638808
K07G5.4	WBGene00010643	8.40137	1.05606	0.575586	1.83475	0.0665427	0.638808
T27F6.6	WBGene00012105	701.01	0.12414	0.0676979	1.83374	0.0666933	0.638808
W04A8.4	WBGene00012239	406.072	-0.533922	0.291263	-1.83313	0.0667836	0.638808
C01G5.4	WBGene00015306	20.9404	2.58094	1.40464	1.83744	0.0661451	0.638808
C17F4.7	WBGene00015913	17345.9	-0.197167	0.107472	-1.83459	0.0665663	0.638808
nhr-162	WBGene00016367	19.7743	0.613931	0.334664	1.83447	0.0665843	0.638808
C55C3.6	WBGene00016956	16.6641	2.72419	1.48566	1.83365	0.0667054	0.638808
atg-16.1	WBGene00017178	345.455	-0.178973	0.0975646	-1.8344	0.0665943	0.638808
F53C3.5	WBGene00018749	8.21425	3.08601	1.6788	1.83822	0.0660294	0.638808
K09C6.7	WBGene00019561	39.9329	2.76523	1.50529	1.83701	0.0662085	0.638808
sti-1	WBGene00019983	3163.3	0.124991	0.0680877	1.83574	0.0663962	0.638808
fbxb-10	WBGene00020362	13.9874	-1.08436	0.59057	-1.83612	0.0663402	0.638808
shl-1	WBGene00022240	34.1976	0.482373	0.263153	1.83305	0.0667953	0.638808
T25B9.11	WBGene00044990	7.74574	0.997036	0.543383	1.83487	0.0665251	0.638808
T26G10.7	WBGene00206420	52.5719	-0.426562	0.232027	-1.83842	0.0660009	0.638808
C08F11.13	WBGene00007460	212.607	0.587923	0.320929	1.83194	0.0669602	0.639999
ncx-9	WBGene00003574	7.667	1.05333	0.575736	1.82953	0.0673202	0.641716
F46C3.2	WBGene00009777	24.537	0.582172	0.318234	1.82938	0.0673423	0.641716
ctps-1	WBGene00012316	4132.41	0.154849	0.0846173	1.82999	0.0672517	0.641716
F14D2.14	WBGene00017462	90.2999	0.319894	0.174761	1.83046	0.067181	0.641716
ZK822.8	WBGene00194665	8.41626	-1.13469	0.620181	-1.82962	0.0673071	0.641716
C01A2.1	WBGene00007213	16.491	-1.26291	0.690818	-1.82814	0.0675288	0.642266
T02E1.6	WBGene00011378	19.8959	2.76258	1.51078	1.82857	0.0674639	0.642266
acd-5	WBGene00020903	140.857	0.297353	0.162639	1.8283	0.0675053	0.642266
#N/A	WBGene00304788	14.3238	1.12271	0.614203	1.82792	0.0675621	0.642266
C01G6.4	WBGene00007226	835.109	0.14412	0.0788824	1.82702	0.0676971	0.643163
W05E10.1	WBGene00012280	54.7471	0.427539	0.234088	1.82641	0.0677889	0.643264
clec-6	WBGene00016451	6.22074	1.02418	0.560733	1.82649	0.0677758	0.643264
srd-23	WBGene00005101	5.2939	1.3038	0.714266	1.82537	0.0679457	0.64398
ZK1320.13	WBGene00044007	76.8514	-0.411487	0.225401	-1.82558	0.0679133	0.64398
dhhc-12	WBGene00010323	10.1066	-2.21108	1.2118	-1.82462	0.0680581	0.644496
Y67A10A.10	WBGene00013459	67.7313	0.427723	0.234437	1.82447	0.0680814	0.644496
hsp-17	WBGene00002021	426.938	0.385566	0.211443	1.8235	0.0682275	0.645493
F38B6.6	WBGene00018175	35.1416	-0.70324	0.385793	-1.82284	0.0683275	0.646053
Y37E11AL.1	WBGene00021357	7.67137	1.26194	0.692453	1.82242	0.0683908	0.646267
cct-7	WBGene00020391	6079.33	0.173895	0.0954747	1.82137	0.068551	0.647009
T13C5.6	WBGene00020486	135.766	-0.297773	0.163475	-1.82152	0.0685281	0.647009
plg-1	WBGene00004041	608.62	-0.191753	0.105381	-1.81962	0.0688176	0.649139
frm-1	WBGene00001488	5299.04	0.177986	0.0981905	1.81266	0.0698842	0.649534
gcy-6	WBGene00001533	5.89876	-2.50692	1.38008	-1.8165	0.0692938	0.649534
gcy-23	WBGene00001548	45.8219	0.534468	0.294311	1.816	0.069371	0.649534
his-43	WBGene00001917	6.81522	5.33195	2.94098	1.81298	0.0698342	0.649534
ncr-2	WBGene00003562	42.3951	0.606506	0.333825	1.81684	0.069242	0.649534
pmk-3	WBGene00004057	762.653	0.223407	0.123165	1.81388	0.0696958	0.649534
vps-35	WBGene00006933	3417.7	0.111144	0.0611029	1.81896	0.0689175	0.649534
B0284.3	WBGene00007133	45.3819	-0.712646	0.392383	-1.8162	0.0693396	0.649534
npr-4	WBGene00007635	35.4988	0.487204	0.268213	1.81648	0.0692969	0.649534
C25D7.15	WBGene00007722	21.4226	1.22598	0.675961	1.81369	0.0697256	0.649534
F40F12.3	WBGene00009592	11.0049	2.78041	1.5334	1.81323	0.0697957	0.649534
Y38H8A.1	WBGene00012635	14.7425	-1.06895	0.589352	-1.81377	0.0697125	0.649534
fbxa-115	WBGene00013755	67.919	-0.400074	0.220474	-1.81461	0.0695843	0.649534
B0034.1	WBGene00015002	15.8606	0.754879	0.41529	1.81771	0.0691077	0.649534
misc-1	WBGene00015186	1427.28	-0.14831	0.081578	-1.81802	0.0690618	0.649534
crh-2	WBGene00016162	1542.87	0.14148	0.0778657	1.81697	0.0692215	0.649534
F48B9.1	WBGene00018587	20.0224	0.758448	0.418008	1.81443	0.0696113	0.649534
F54G2.1	WBGene00018837	212.647	-0.250741	0.13811	-1.81552	0.0694438	0.649534
tmem-135	WBGene00019345	135.983	-0.336658	0.185104	-1.81875	0.0689492	0.649534
R12B2.2	WBGene00020018	189.809	-0.291693	0.160765	-1.8144	0.0696154	0.649534
R155.3	WBGene00020117	15.6809	2.80051	1.54486	1.8128	0.0698631	0.649534
W02D3.4	WBGene00020933	1821.19	0.0800583	0.0441108	1.81494	0.0695334	0.649534
Y47G6A.18	WBGene00021644	1177.18	0.21325	0.11733	1.81751	0.0691385	0.649534
Y49F6B.2	WBGene00021715	534.93	-0.202236	0.111551	-1.81294	0.0698408	0.649534
atg-5	WBGene00022152	723.434	0.126725	0.0698021	1.8155	0.0694477	0.649534
srx-13	WBGene00005904	4.11661	2.78091	1.53459	1.81215	0.0699634	0.649888
sol-1	WBGene00004944	16.1526	-0.671104	0.37061	-1.81081	0.0701705	0.650355
M03B6.3	WBGene00010835	75.6199	-0.680291	0.375656	-1.81094	0.0701501	0.650355
H20J04.1	WBGene00019216	13.9041	2.77581	1.53229	1.81154	0.0700578	0.650355
C33F10.14	WBGene00050941	607.872	-0.195152	0.107773	-1.81076	0.0701778	0.650355
M04D5.1	WBGene00014807	21.3453	-0.730855	0.40384	-1.80976	0.0703326	0.651029
C29H12.2	WBGene00016235	4152.56	0.112403	0.0621036	1.80993	0.0703068	0.651029
jac-1	WBGene00002175	595.568	0.267398	0.147778	1.80945	0.0703806	0.651092
ZC443.1	WBGene00013896	54.4708	-0.395127	0.218486	-1.80848	0.0705321	0.652113
kel-10	WBGene00002186	51.7128	-1.64476	0.910147	-1.80713	0.0707416	0.653241
C06E1.1	WBGene00015518	110.224	-0.334153	0.184886	-1.80735	0.0707077	0.653241
hrpl-1	WBGene00016624	950.488	0.124869	0.0691084	1.80685	0.0707852	0.653241
oxy-4	WBGene00021902	531.804	-0.163172	0.090318	-1.80664	0.070819	0.653241
C33E10.1	WBGene00016345	23.3052	-0.90308	0.500068	-1.80592	0.0709316	0.653519
F47B3.7	WBGene00018531	41.4346	2.75602	1.52588	1.80618	0.0708904	0.653519
dnj-24	WBGene00001042	249.346	0.203374	0.112686	1.80479	0.0711075	0.65362
C17G10.7	WBGene00015919	20.4615	-0.750957	0.416028	-1.80507	0.0710645	0.65362
Y37E3.17	WBGene00021355	4752.88	0.113937	0.063115	1.80523	0.0710385	0.65362
ZC196.9	WBGene00022552	17.8811	1.225	0.678684	1.80496	0.0710805	0.65362
C18G1.1	WBGene00015980	11.4198	-0.927544	0.514227	-1.80377	0.071268	0.653995
C38C3.3	WBGene00016512	36.7518	2.22606	1.23402	1.80392	0.0712441	0.653995
mrpl-40	WBGene00018793	755.817	-0.155897	0.08643	-1.80374	0.0712721	0.653995
F09E10.7	WBGene00017297	25.2444	-0.71742	0.397909	-1.80298	0.0713918	0.654714
fbxb-59	WBGene00013759	17.9932	-0.680476	0.377515	-1.80251	0.071465	0.655006
his-25	WBGene00001899	11.8322	-5.47789	3.04048	-1.80165	0.0715997	0.655862
D2030.2	WBGene00008412	1909.29	0.126208	0.0700934	1.80057	0.07177	0.65618
T01G1.2	WBGene00011337	48.8949	-0.400207	0.222277	-1.80049	0.0717832	0.65618
T27D12.1	WBGene00012085	302.954	0.273037	0.151655	1.80038	0.0718001	0.65618
ada-2	WBGene00017967	1518.18	-0.125694	0.0697906	-1.80102	0.0716992	0.65618
grl-27	WBGene00001736	8.11083	1.78767	0.993262	1.7998	0.0718921	0.656642
grh-1	WBGene00001707	183.081	0.63008	0.350221	1.79909	0.0720046	0.657174
ZK892.6	WBGene00014130	83.1083	-0.505942	0.28125	-1.79891	0.0720332	0.657174
F59C6.8	WBGene00010327	12.0607	-0.78231	0.434944	-1.79864	0.072075	0.657176
igeg-1	WBGene00017901	81.501	0.325973	0.181454	1.79645	0.072423	0.65989
swip-10	WBGene00018738	23.0886	-0.699349	0.38934	-1.79624	0.0724559	0.65989
tat-2	WBGene00019166	123.88	0.305799	0.170285	1.79581	0.0725254	0.660143
F41E7.7	WBGene00009623	5.04258	-1.37357	0.765141	-1.79518	0.0726252	0.660474
K05F1.6	WBGene00019408	163.515	-0.264498	0.147348	-1.79505	0.0726451	0.660474
col-158	WBGene00000731	57.2403	-0.459203	0.256053	-1.79339	0.0729109	0.661449
mut-14	WBGene00003507	1036.28	-0.125378	0.0700627	-1.78951	0.0735321	0.661449
C14H10.2	WBGene00007592	380.428	-0.265479	0.148094	-1.79264	0.0730304	0.661449
C34B4.2	WBGene00007907	960.414	0.185935	0.103828	1.79079	0.0733266	0.661449
ztf-14	WBGene00010936	12.2355	-1.10459	0.61647	-1.79179	0.0731663	0.661449
T16G12.4	WBGene00011805	278.219	-0.224957	0.125659	-1.79022	0.0734189	0.661449
Y39A1C.1	WBGene00012662	40.9462	-0.51095	0.28536	-1.79055	0.0733662	0.661449
C26F1.1	WBGene00016146	39.4635	-0.931471	0.519415	-1.79331	0.0729234	0.661449
F09G2.1	WBGene00017310	317.066	0.315176	0.175874	1.79205	0.0731243	0.661449
F36H5.4	WBGene00018103	17.7539	-0.855656	0.477822	-1.79074	0.0733348	0.661449
F37C4.5	WBGene00018145	5246.85	0.294662	0.164496	1.7913	0.0732453	0.661449
nhr-181	WBGene00018189	144.146	0.609131	0.340561	1.78861	0.0736776	0.661449
F43B10.1	WBGene00018373	305.452	0.25414	0.142158	1.78773	0.0738202	0.661449
nep-18	WBGene00019343	47.1508	-0.696652	0.389607	-1.78809	0.0737615	0.661449
tbce-1	WBGene00019503	1288.77	0.17735	0.0989541	1.79224	0.0730944	0.661449
ztf-16	WBGene00019960	123.513	0.410838	0.229785	1.78792	0.0737884	0.661449
R12C12.9	WBGene00020029	135.692	0.327093	0.182728	1.79006	0.0734451	0.661449
ferl-1	WBGene00020262	55.1903	-0.493372	0.275942	-1.78796	0.0737829	0.661449
T20F5.4	WBGene00020626	134.652	-0.591599	0.330126	-1.79204	0.0731261	0.661449
Y58A7A.2	WBGene00021976	12.3686	-1.24266	0.695149	-1.78762	0.0738376	0.661449
Y71H2AM.1	WBGene00022166	794.893	0.14554	0.0811869	1.79265	0.0730292	0.661449
Y110A7A.15	WBGene00022462	1573.56	-0.326955	0.182881	-1.7878	0.0738075	0.661449
toe-1	WBGene00022739	3364.14	-0.1553	0.0865782	-1.79376	0.0728522	0.661449
ZK1248.5	WBGene00022876	20.2922	2.75209	1.53643	1.79122	0.0732576	0.661449
C05A9.3	WBGene00196216	4.13898	-2.67791	1.49688	-1.78899	0.073616	0.661449
C14F5.10	WBGene00200658	5.67792	2.53099	1.41469	1.78907	0.0736037	0.661449
B0391.10	WBGene00007165	382.661	-0.224363	0.125606	-1.78623	0.0740612	0.663078
T03G6.1	WBGene00020194	75.2734	-0.593232	0.332226	-1.78563	0.0741596	0.663584
daf-14	WBGene00000910	196.238	0.248078	0.138958	1.78527	0.0742169	0.663722
Y65A5A.1	WBGene00013418	53.9731	-0.690354	0.38681	-1.78474	0.0743041	0.664127
ctb-1	WBGene00000829	19656.6	0.4238	0.237507	1.78437	0.0743643	0.66429
K12D12.4	WBGene00010786	12.2811	1.25244	0.702263	1.78343	0.0745162	0.665272
C39D10.6	WBGene00016533	13.1306	0.774883	0.434612	1.78293	0.074598	0.665627
B0334.5	WBGene00007145	1044.29	0.215029	0.120659	1.78211	0.0747309	0.666221
R07E3.1	WBGene00011102	604.827	0.215727	0.121059	1.782	0.0747486	0.666221
tep-1	WBGene00013969	1376.73	0.215768	0.121106	1.78165	0.0748068	0.666365
fbxc-24	WBGene00019927	41.2115	-0.818402	0.459789	-1.77995	0.0750839	0.668458
mnp-1	WBGene00007139	271.586	-0.44859	0.252112	-1.77933	0.0751862	0.668993
lin-26	WBGene00003012	2288.71	0.127856	0.071872	1.77895	0.0752486	0.669172
C47E8.1	WBGene00008141	5.85684	2.77609	1.56104	1.77836	0.0753442	0.669271
Y37E3.30	WBGene00235158	39.6827	-0.63311	0.355982	-1.77849	0.0753236	0.669271
skih-2	WBGene00008502	2329.94	0.188489	0.10603	1.7777	0.075453	0.669862
K10C3.4	WBGene00010731	2979.77	0.145284	0.0817746	1.77664	0.0756268	0.670512
cand-1	WBGene00013606	5629.54	0.173015	0.0973741	1.77681	0.0755995	0.670512
ZC412.5	WBGene00013886	6.65794	2.74803	1.5471	1.77624	0.0756931	0.670512
acs-4	WBGene00018152	10079.4	0.195474	0.11005	1.77623	0.0756955	0.670512
vps-34	WBGene00006932	1281.21	0.114162	0.0643155	1.77504	0.075892	0.671877
osm-6	WBGene00003886	11.6439	-1.00083	0.564055	-1.77434	0.0760064	0.67214
T06C10.3	WBGene00020289	22.3634	1.77671	1.00123	1.77453	0.0759762	0.67214
acox-1.3	WBGene00008566	228.228	-0.247003	0.139305	-1.7731	0.0762116	0.673017
K01D12.9	WBGene00010468	16.5042	1.04044	0.58671	1.77334	0.0761716	0.673017
fipr-5	WBGene00044174	23.2849	0.562058	0.317014	1.77297	0.0762331	0.673017
inx-8	WBGene00002130	1933.16	0.137785	0.0777324	1.77256	0.076302	0.67325
W02H3.1	WBGene00012217	105.445	0.431433	0.24359	1.77114	0.0765373	0.674798
ZK1053.2	WBGene00014197	82.4464	2.1266	1.20097	1.77073	0.0766051	0.674798
ZK686.2	WBGene00022792	1753.02	-0.089516	0.0505514	-1.77079	0.0765955	0.674798
nhr-123	WBGene00003713	25.8179	0.586703	0.331564	1.7695	0.0768098	0.6751
C34C6.4	WBGene00007917	928.739	0.150208	0.0848754	1.76975	0.0767692	0.6751
bus-12	WBGene00010442	15.14	-0.889797	0.502825	-1.7696	0.0767942	0.6751
F13E9.13	WBGene00044797	33.2147	-0.565494	0.319522	-1.76982	0.0767577	0.6751
sdc-2	WBGene00004746	560.037	-0.290002	0.163939	-1.76896	0.0769009	0.675526
B0034.4	WBGene00015004	4.44701	2.55103	1.4427	1.76823	0.0770222	0.676217
atgp-2	WBGene00000225	497.006	0.300521	0.169981	1.76797	0.0770657	0.676224
col-68	WBGene00000644	23.2397	-0.729153	0.413055	-1.76527	0.0775191	0.676656
dyf-2	WBGene00001118	68.5254	-0.639042	0.361702	-1.76676	0.0772681	0.676656
lin-14	WBGene00003003	528.336	0.303609	0.171938	1.7658	0.077429	0.676656
srd-70	WBGene00005147	11.5279	1.11017	0.628409	1.76663	0.07729	0.676656
C29F7.2	WBGene00007811	279.245	-0.358024	0.202836	-1.76509	0.0775485	0.676656
slc-17.2	WBGene00008000	3949.63	0.127269	0.0721005	1.76516	0.077537	0.676656
valv-1	WBGene00015216	101.727	0.409662	0.232119	1.76488	0.0775846	0.676656
nep-11	WBGene00017557	80.775	-0.353437	0.20026	-1.76489	0.0775821	0.676656
F33E11.3	WBGene00018011	1890.42	0.153072	0.0866965	1.76561	0.0774614	0.676656
flp-34	WBGene00019975	16.9777	-0.751026	0.425324	-1.76577	0.0774337	0.676656
M162.12	WBGene00050946	38.3113	0.977956	0.553746	1.76607	0.0773835	0.676656
glna-2	WBGene00008435	258.489	-0.345254	0.195654	-1.76461	0.077629	0.67667
ikke-1	WBGene00011299	3611.48	0.132155	0.0749191	1.76398	0.077736	0.676859
ZK666.4	WBGene00014044	4.47023	2.62552	1.48828	1.76413	0.0777105	0.676859
F46C5.2	WBGene00009779	8.3148	-1.00045	0.567325	-1.76345	0.0778238	0.677251
F41C3.5	WBGene00018271	9955.47	0.145552	0.0825576	1.76303	0.0778948	0.677497
unc-50	WBGene00006785	1283.46	0.181494	0.103037	1.76144	0.0781647	0.679471
zip-12	WBGene00013560	166.552	-0.254957	0.144809	-1.76065	0.0782975	0.680253
acl-1	WBGene00010339	677.194	-0.132486	0.0753068	-1.75929	0.0785287	0.681141
Y111B2A.21	WBGene00013741	34.1321	-0.498003	0.283062	-1.75934	0.0785198	0.681141
W03F11.4	WBGene00021007	61.953	2.1747	1.23611	1.75931	0.0785243	0.681141
hlh-1	WBGene00001948	48.6691	-0.613984	0.349247	-1.75802	0.0787437	0.681147
nhr-109	WBGene00003699	57.8487	-0.350819	0.199502	-1.75847	0.0786676	0.681147
meg-2	WBGene00010493	823.181	0.236179	0.134344	1.75802	0.0787443	0.681147
eri-9	WBGene00016143	1764.3	0.153201	0.0870996	1.75891	0.0785923	0.681147
F46G11.6	WBGene00045269	6.26053	-1.25992	0.71636	-1.75878	0.0786157	0.681147
T28B8.1	WBGene00012113	467.505	0.309263	0.175991	1.75726	0.0788729	0.681887
ceh-40	WBGene00000461	135.881	-0.328543	0.187145	-1.75555	0.0791649	0.682315
col-90	WBGene00000665	4.52115	2.76967	1.57849	1.75463	0.0793224	0.682315
inx-2	WBGene00002124	526.632	-0.318163	0.181454	-1.75341	0.0795322	0.682315
nhr-122	WBGene00003712	104.147	-0.282855	0.161242	-1.75422	0.0793921	0.682315
skr-5	WBGene00004811	6.59744	-1.31627	0.751361	-1.75185	0.0797999	0.682315
sma-5	WBGene00004859	291.659	0.310955	0.177109	1.75572	0.0791357	0.682315
sss-1	WBGene00006056	136.981	1.29458	0.738906	1.75202	0.0797705	0.682315
unc-45	WBGene00006781	1854.48	0.13556	0.077282	1.7541	0.0794131	0.682315
gale-1	WBGene00008132	2042.11	-0.124465	0.0709616	-1.75398	0.0794336	0.682315
cal-7	WBGene00009585	4.34687	2.82048	1.60798	1.75405	0.0794213	0.682315
swan-2	WBGene00009976	712.471	0.172498	0.0982283	1.7561	0.0790718	0.682315
R01E6.2	WBGene00010968	3.29555	-2.47781	1.41213	-1.75466	0.0793171	0.682315
cutl-11	WBGene00011443	9.41619	-1.23582	0.705201	-1.75244	0.0796988	0.682315
C34F11.5	WBGene00016416	48.1598	2.17022	1.23682	1.75468	0.0793144	0.682315
C50E10.1	WBGene00016825	26.966	2.20712	1.25999	1.7517	0.0798251	0.682315
M01G5.3	WBGene00019716	847.405	0.13524	0.0771118	1.75382	0.079461	0.682315
R02F11.1	WBGene00019839	72.9425	-0.755783	0.431441	-1.75176	0.0798145	0.682315
R03H10.7	WBGene00019859	9.31431	1.02288	0.583928	1.75173	0.0798202	0.682315
let-355	WBGene00020263	2353.54	0.150782	0.0860001	1.75328	0.0795544	0.682315
Y71H2B.2	WBGene00022192	1738.8	0.128716	0.0732861	1.75635	0.0790293	0.682315
C25F9.12	WBGene00045412	11.8946	2.26591	1.29356	1.75169	0.0798266	0.682315
mdf-1	WBGene00003160	2798.99	-0.112495	0.064262	-1.75056	0.0800213	0.682507
pot-3	WBGene00007065	202.011	0.243024	0.138817	1.75068	0.0800006	0.682507
glf-1	WBGene00019154	159.713	-0.48046	0.274448	-1.75064	0.0800078	0.682507
linc-14	WBGene00195060	5.4813	1.23127	0.703266	1.75079	0.0799813	0.682507
Y105E8A.1	WBGene00013666	62.3073	-0.477723	0.273004	-1.74987	0.0801404	0.682788
ZC376.1	WBGene00013873	17.2776	-0.853385	0.487667	-1.74993	0.08013	0.682788
ugt-65	WBGene00008583	77.4186	-0.322986	0.184625	-1.74942	0.0802187	0.683088
pat-12	WBGene00003936	1944.66	0.191289	0.109452	1.74769	0.0805175	0.683913
pqn-70	WBGene00004152	2693.02	-0.132736	0.0759234	-1.74829	0.0804137	0.683913
C09G1.5	WBGene00007487	27.8546	-0.576579	0.329763	-1.74846	0.0803836	0.683913
ZK1053.3	WBGene00014198	10.1856	1.05602	0.60414	1.74797	0.0804684	0.683913
tfbm-1	WBGene00020189	457.093	0.153332	0.0877382	1.74761	0.0805315	0.683913
C29A12.6	WBGene00007800	14.625	-0.925462	0.529683	-1.7472	0.0806028	0.684152
B0286.1	WBGene00015115	100.755	-0.372805	0.213517	-1.74602	0.080808	0.685165
kin-33	WBGene00017083	72.1852	-0.440035	0.252023	-1.74601	0.0808085	0.685165
ugt-45	WBGene00021372	304.59	0.160682	0.0920417	1.74575	0.0808549	0.685191
algn-6	WBGene00007435	724.777	0.15828	0.0907398	1.74433	0.0811009	0.686542
nprt-1	WBGene00021882	1816.89	0.131845	0.0755787	1.74447	0.0810764	0.686542
cah-4	WBGene00000282	2188.87	0.171864	0.0985893	1.74324	0.0812925	0.68773
skn-1	WBGene00004804	4780.43	0.18112	0.104059	1.74055	0.081762	0.68773
smg-7	WBGene00004885	631.8	0.129469	0.0743713	1.74084	0.0817115	0.68773
C03A3.1	WBGene00007266	45.9309	-0.66822	0.383734	-1.74136	0.0816198	0.68773
K02B7.3	WBGene00010491	307.533	-0.222998	0.127958	-1.74275	0.0813781	0.68773
K10C3.5	WBGene00010732	1475.43	0.114903	0.0659791	1.7415	0.0815961	0.68773
VW02B12L.2	WBGene00012155	9.84082	1.07503	0.617257	1.74163	0.0815739	0.68773
Y53F4B.8	WBGene00013155	389.793	0.775479	0.445241	1.74171	0.0815598	0.68773
ent-5	WBGene00017532	525.076	0.18392	0.105619	1.74136	0.0816208	0.68773
F28B12.1	WBGene00017894	20.3454	-0.751565	0.431731	-1.74082	0.0817153	0.68773
K02E7.5	WBGene00019310	18.6594	-1.03066	0.591771	-1.74166	0.0815688	0.68773
ZK652.8	WBGene00022786	72.3242	0.321004	0.184418	1.74063	0.0817489	0.68773
F32A5.4	WBGene00017970	551.999	0.33037	0.189883	1.73986	0.0818829	0.688016
clec-119	WBGene00018575	22.8517	1.18168	0.679158	1.73992	0.0818739	0.688016
ugt-50	WBGene00011564	390.882	-0.40186	0.231107	-1.73885	0.0820615	0.688199
rpb-2	WBGene00016140	4707.63	0.09555	0.0549319	1.73943	0.0819595	0.688199
K02E7.11	WBGene00019315	4.71061	-1.48755	0.855367	-1.73908	0.082021	0.688199
Y62E10A.20	WBGene00044745	144.718	-0.243335	0.139948	-1.73875	0.0820784	0.688199
ssq-3	WBGene00006052	79.3495	-2.33113	1.3415	-1.7377	0.082264	0.6892
crtc-1	WBGene00021237	185.511	0.223916	0.128867	1.73758	0.0822847	0.6892
lsm-7	WBGene00003081	580.846	-0.211161	0.12166	-1.73567	0.0826229	0.69026
Y48A6B.9	WBGene00012970	109.256	-0.342405	0.197308	-1.73538	0.0826726	0.69026
cdgs-1	WBGene00016384	1251.63	0.184616	0.106369	1.73561	0.0826333	0.69026
nep-22	WBGene00020788	664.194	-0.215658	0.12422	-1.73609	0.0825477	0.69026
ccep-290	WBGene00021643	38.0028	-0.559623	0.322301	-1.73634	0.0825044	0.69026
anr-54	WBGene00219672	2.58088	2.76691	1.59375	1.73611	0.0825448	0.69026
Y53H1C.3	WBGene00013186	9.57936	-2.4939	1.43797	-1.73433	0.0828602	0.691461
grl-18	WBGene00001727	6.63312	-1.01685	0.586398	-1.73405	0.0829083	0.691499
flp-5	WBGene00001448	67.0627	-0.416116	0.240026	-1.73363	0.0829837	0.691763
npp-1	WBGene00003787	2707.16	-0.103812	0.0598975	-1.73316	0.0830679	0.692101
ptc-1	WBGene00004208	16590.9	0.199362	0.115143	1.73143	0.0833759	0.693043
rnt-1	WBGene00004393	14.8206	-0.855775	0.494113	-1.73194	0.083284	0.693043
T08D2.7	WBGene00011612	50.3894	-0.435302	0.251432	-1.73129	0.0833996	0.693043
dod-3	WBGene00016052	27.0617	-0.762459	0.440305	-1.73166	0.0833336	0.693043
tbc-11	WBGene00018075	412.835	-0.200999	0.116074	-1.73166	0.0833349	0.693043
C46C2.3	WBGene00008111	11.9618	-1.20376	0.695526	-1.73072	0.0835025	0.693361
jmjd-4	WBGene00011563	54.9568	-0.389688	0.225177	-1.73059	0.0835254	0.693361
ceh-27	WBGene00000449	43.3547	-0.728486	0.421554	-1.7281	0.0839708	0.694668
let-92	WBGene00002363	6777.71	0.0627771	0.0363346	1.72775	0.0840335	0.694668
sams-5	WBGene00006416	57.0732	-0.726428	0.420057	-1.72935	0.0837459	0.694668
trpa-1	WBGene00007801	88.2252	-0.365846	0.211665	-1.72841	0.0839139	0.694668
tag-297	WBGene00007999	54.1432	-0.587951	0.340206	-1.72822	0.0839484	0.694668
Y62E10A.13	WBGene00013379	1012.39	-0.251377	0.145399	-1.72887	0.0838315	0.694668
vpr-1	WBGene00018008	3378.82	0.0843201	0.0487768	1.72869	0.0838643	0.694668
fbxb-51	WBGene00019414	12.6225	-0.951541	0.55068	-1.72794	0.0839995	0.694668
F22F1.3	WBGene00017715	6.57418	-1.08641	0.629019	-1.72715	0.084141	0.695194
lron-15	WBGene00016974	37.8468	-0.530422	0.307248	-1.72637	0.0842814	0.695629
T28D9.4	WBGene00020896	1343.59	0.134432	0.0778653	1.72647	0.0842633	0.695629
ubc-13	WBGene00006708	2156.51	0.103355	0.0598867	1.72584	0.0843758	0.696046
cyp-36A1	WBGene00007913	351.944	0.310658	0.180099	1.72493	0.0845395	0.69691
E01G4.7	WBGene00045410	121.691	-0.267767	0.155248	-1.72477	0.0845685	0.69691
clec-140	WBGene00020220	11.9615	-1.21558	0.705097	-1.72398	0.0847108	0.69772
pes-1	WBGene00003976	55.6697	-0.400616	0.232458	-1.72339	0.0848176	0.698236
fbxa-95	WBGene00009222	188.476	0.214539	0.12452	1.72292	0.0849029	0.698575
C47E12.3	WBGene00008148	1107.13	0.104225	0.0605208	1.72213	0.0850456	0.699386
pros-1	WBGene00000448	86.2698	-0.446771	0.260125	-1.71753	0.0858831	0.699491
cpr-3	WBGene00000783	257.351	0.550997	0.320843	1.71734	0.0859165	0.699491
cwn-1	WBGene00000857	123.636	-0.425424	0.247536	-1.71864	0.0856799	0.699491
flp-8	WBGene00001451	64.6072	0.43807	0.25443	1.72177	0.085111	0.699491
frm-10	WBGene00001496	1704.9	0.130313	0.0759013	1.71687	0.0860021	0.699491
lon-2	WBGene00003056	348.287	0.136109	0.0792368	1.71775	0.0858429	0.699491
tsp-2	WBGene00006628	23.6771	0.687237	0.399951	1.7183	0.0857417	0.699491
B0491.1	WBGene00007189	700.472	0.133474	0.0775949	1.72014	0.0854075	0.699491
C33A11.2	WBGene00007878	115.124	0.279196	0.16234	1.71982	0.085465	0.699491
F11E6.9	WBGene00008712	12.4316	-1.06979	0.622856	-1.71756	0.0858775	0.699491
F54C8.6	WBGene00010039	50.3414	-0.591522	0.344141	-1.71884	0.0856441	0.699491
T24B1.1	WBGene00011975	1217.44	-0.089086	0.0518419	-1.71842	0.0857208	0.699491
T28D6.4	WBGene00012124	81.5642	0.349069	0.202953	1.71995	0.0854421	0.699491
ceh-92	WBGene00013431	1188.03	0.173061	0.100573	1.72076	0.085294	0.699491
Y70G10A.1	WBGene00014946	10.6436	-0.993031	0.576912	-1.72129	0.0851988	0.699491
C04E12.10	WBGene00015439	8.35263	1.27754	0.743076	1.71926	0.0855666	0.699491
F20D6.8	WBGene00017637	20.6965	-0.637477	0.37041	-1.721	0.0852505	0.699491
fbxb-107	WBGene00017912	9.46249	-0.95174	0.553754	-1.7187	0.0856681	0.699491
F31D5.6	WBGene00017949	13.9937	-1.24596	0.723769	-1.72149	0.0851622	0.699491
dhhc-3	WBGene00018009	1151.43	0.123782	0.0721084	1.71661	0.086051	0.699491
Y50D4B.2	WBGene00021741	35.5373	-0.617256	0.35905	-1.71913	0.08559	0.699491
Y52D5A.1	WBGene00021792	4.15831	2.81178	1.638	1.71659	0.0860537	0.699491
anr-16	WBGene00219587	7.07643	1.48253	0.863702	1.71648	0.0860735	0.699491
unc-11	WBGene00006751	1941.11	0.23375	0.136206	1.71615	0.086134	0.699623
T26A8.1	WBGene00020824	2638.48	0.162241	0.0945675	1.71561	0.0862342	0.700079
C49C3.2	WBGene00008192	6.5343	-1.73747	1.0131	-1.715	0.0863447	0.700616
dkf-2	WBGene00012019	1365.99	0.189951	0.110794	1.71445	0.0864455	0.701076
M28.5	WBGene00010896	5998.42	-0.0926223	0.0540441	-1.71383	0.0865602	0.701647
cox-11	WBGene00010437	593.596	0.174698	0.101949	1.71358	0.0866051	0.701652
rrbs-1	WBGene00007617	2400	-0.12426	0.0725315	-1.71319	0.0866785	0.701888
Y75B8A.8	WBGene00013545	1830.7	0.114591	0.0669082	1.71267	0.0867738	0.7023
hst-3.2	WBGene00044303	23.0879	-0.858768	0.50151	-1.71237	0.0868292	0.70239
tank-1	WBGene00004053	1885.42	0.393009	0.229739	1.71068	0.0871408	0.703138
F55C5.2	WBGene00010092	38.3211	-2.08933	1.22118	-1.71091	0.0870976	0.703138
Y54E2A.7	WBGene00013192	15.182	2.49852	1.46047	1.71076	0.0871253	0.703138
tsg-101	WBGene00015658	1676.06	0.142432	0.0832294	1.71132	0.0870214	0.703138
thoc-5	WBGene00021311	1630.89	-0.113631	0.066425	-1.71066	0.0871436	0.703138
F28C1.3	WBGene00009201	1050.86	0.160916	0.0940937	1.71016	0.0872358	0.703524
igcm-4	WBGene00022418	159.466	-0.441617	0.258326	-1.70953	0.0873526	0.704108
cfz-2	WBGene00000478	122.865	-0.521771	0.30528	-1.70915	0.0874223	0.704312
tns-1	WBGene00006508	834.987	0.210295	0.123119	1.70806	0.0876254	0.705339
F25B5.5	WBGene00017776	1073.31	0.164174	0.0961212	1.70799	0.0876388	0.705339
vrp-1	WBGene00021869	1161.85	-0.20407	0.1195	-1.7077	0.0876918	0.705407
F35C5.1	WBGene00009390	8.94368	1.22181	0.715977	1.70649	0.0879174	0.706863
F10D7.3	WBGene00017340	65.4014	-0.428671	0.251314	-1.70572	0.088061	0.707659
his-15	WBGene00001889	4.87012	6.80021	3.98915	1.70468	0.0882548	0.708728
algn-9	WBGene00007556	1579.66	0.106145	0.0622723	1.70452	0.0882836	0.708728
kin-9	WBGene00002195	23.0735	0.554237	0.325389	1.70331	0.0885104	0.708772
pho-1	WBGene00004020	687.161	-0.194	0.113942	-1.70262	0.0886396	0.708772
rps-0	WBGene00004469	38232.4	0.12684	0.0745291	1.70188	0.0887772	0.708772
F14H3.3	WBGene00008822	326.993	-0.151293	0.0889108	-1.70162	0.0888258	0.708772
fbxb-4	WBGene00010921	10.6285	-1.15399	0.677714	-1.70277	0.088611	0.708772
T19B10.8	WBGene00011835	3324.45	0.0816923	0.0479871	1.70238	0.0886845	0.708772
W02B12.4	WBGene00012202	81.3691	-0.371339	0.218193	-1.70189	0.0887764	0.708772
agef-1	WBGene00012386	2584.16	0.178214	0.104723	1.70177	0.0887978	0.708772
cyp-34A5	WBGene00015040	14.2115	0.689498	0.40504	1.7023	0.0886999	0.708772
C44E4.5	WBGene00016654	1346.3	0.117038	0.0687105	1.70336	0.0885012	0.708772
F49D11.6	WBGene00018630	12.53	-1.0195	0.599087	-1.70176	0.0888	0.708772
T09D3.3	WBGene00020384	6.96617	-1.68259	0.98879	-1.70167	0.0888181	0.708772
ZK1010.2	WBGene00014176	1035.04	0.0995744	0.058536	1.70108	0.0889283	0.709233
dnj-16	WBGene00001034	1413.69	0.0981768	0.0577959	1.69868	0.0893792	0.710349
num-1	WBGene00003830	3032.68	0.17785	0.104695	1.69875	0.089366	0.710349
pdi-1	WBGene00003962	8102.07	0.107578	0.0632869	1.69984	0.089161	0.710349
Y43F8B.9	WBGene00012819	83.9483	0.400035	0.235376	1.69956	0.0892146	0.710349
Y62H9A.12	WBGene00013400	15.342	0.844816	0.49741	1.69843	0.0894268	0.710349
D2092.8	WBGene00017068	5.17928	1.22493	0.721142	1.6986	0.0893945	0.710349
epg-4	WBGene00018150	1380.03	0.150221	0.0884459	1.69845	0.0894234	0.710349
nep-20	WBGene00020293	18.0376	1.33412	0.785323	1.69882	0.0893529	0.710349
ufc-1	WBGene00008041	579.893	-0.15511	0.0913796	-1.69743	0.0896155	0.711492
T19C4.1	WBGene00011838	73.3069	-0.51091	0.301034	-1.69718	0.0896626	0.711509
ras-1	WBGene00004310	219.336	0.23283	0.137242	1.69649	0.089793	0.712027
Y38H6C.16	WBGene00012628	44.1667	-0.502602	0.296324	-1.69612	0.0898626	0.712027
[truncated: 13,849 more rows]

## Sheet: PRDE1_30mHS.vs.PRDE1_Ctrl
gene.name	row	baseMean	log2FoldChange	lfcSE	stat	pvalue	padj
hsp-16.11	WBGene00002017	7342.58	9.01307	0.264277	34.1046	6.30886e-255	9.02861e-251
F44E5.5	WBGene00009692	36446.7	11.7763	0.413187	28.5011	1.13384e-178	8.11321e-175
hsp-70	WBGene00002026	4430.11	9.45223	0.340231	27.7818	7.2022e-170	3.43569e-166
F44E5.4	WBGene00009691	40050.9	12.2867	0.45103	27.2415	2.09685e-163	7.50202e-160
R107.5	WBGene00011300	3763.65	1.58236	0.0758801	20.8534	1.41956e-96	4.06307e-93
C50F4.6	WBGene00001910	320.84	3.24438	0.165524	19.6007	1.52607e-85	3.63994e-82
C30E1.9	WBGene00022951	5167.69	2.53633	0.131706	19.2575	1.22096e-82	2.49617e-79
asp-13	WBGene00017881	1409.2	-3.44152	0.217082	-15.8535	1.32944e-56	2.3782e-53
scp-1	WBGene00004744	1983.83	1.32145	0.08389	15.7522	6.63362e-56	1.05482e-52
R11A5.3	WBGene00011231	954.125	3.60386	0.229074	15.7323	9.08724e-56	1.30048e-52
K06A4.7	WBGene00010597	217.172	-3.60804	0.239149	-15.087	1.97142e-51	2.56482e-48
MTCE.7	WBGene00014454	4515.45	4.62906	0.312434	14.8161	1.1526e-49	1.37457e-46
his-41	WBGene00001915	837.176	1.45109	0.103089	14.0762	5.32144e-45	5.85809e-42
linc-6	WBGene00219700	100.773	3.67832	0.261588	14.0615	6.54907e-45	6.69455e-42
tts-1	WBGene00006650	1697.55	2.21019	0.17115	12.9138	3.76405e-38	3.59115e-35
hsp-16.2	WBGene00002016	1543.62	10.89	0.844925	12.8887	5.20887e-38	4.65901e-35
unc-23	WBGene00006760	1024.63	1.54368	0.12119	12.7377	3.64783e-37	3.07083e-34
Y43F8B.2	WBGene00012813	1911.3	1.81801	0.1469	12.3758	3.53221e-35	2.80831e-32
fil-2	WBGene00019668	62.216	5.81555	0.488938	11.8942	1.26791e-32	9.55004e-30
hsp-16.41	WBGene00002018	1896.34	13.0114	1.19229	10.9129	9.99814e-28	7.15417e-25
nurf-1	WBGene00009180	7425.63	0.887052	0.0871998	10.1726	2.62711e-24	1.79031e-21
K02E11.15	WBGene00304182	101.652	5.12301	0.505865	10.1272	4.18339e-24	2.7213e-21
Y59E9AR.7	WBGene00022002	30.1303	-39.6964	4.06288	-9.77052	1.50681e-22	9.37563e-20
pqn-44	WBGene00004131	2770.16	1.20105	0.122993	9.76519	1.58811e-22	9.46975e-20
dnj-13	WBGene00001031	5307.86	0.720877	0.0749113	9.62307	6.38968e-22	3.65771e-19
#N/A	WBGene00304813	100.61	2.66748	0.279581	9.54099	1.41481e-21	7.78742e-19
bli-1	WBGene00000251	56.7272	3.19694	0.336932	9.48838	2.34662e-21	1.2438e-18
hsp-110	WBGene00016250	17172.5	0.832027	0.0881536	9.43838	3.78593e-21	1.93502e-18
ZC262.7	WBGene00043948	63.3698	3.19873	0.348182	9.18696	4.04115e-20	1.99424e-17
pdha-1	WBGene00011510	7136.6	0.320385	0.0350059	9.1523	5.57316e-20	2.65858e-17
MTCE.33	WBGene00014472	1322.75	3.8039	0.418211	9.09566	9.40148e-20	4.34015e-17
ZK512.7	WBGene00013986	780.404	-1.25524	0.142282	-8.82215	1.12283e-18	5.02151e-16
mans-2	WBGene00008258	566.83	-0.867773	0.0990838	-8.75798	1.98789e-18	8.62081e-16
hsp-16.1	WBGene00002015	379.548	9.71303	1.13822	8.53355	1.41925e-17	5.97378e-15
oac-46	WBGene00011768	243.693	-1.35562	0.160996	-8.42019	3.7587e-17	1.53688e-14
his-35	WBGene00001909	666.892	0.847165	0.10398	8.1474	3.71825e-16	1.47811e-13
fbxb-72	WBGene00019243	52.5312	2.89926	0.356934	8.12268	4.55995e-16	1.76372e-13
Y47D3B.6	WBGene00012942	114.531	4.1665	0.524042	7.95069	1.8547e-15	6.98489e-13
W03F9.1	WBGene00020999	3252.59	0.929216	0.119787	7.75723	8.68015e-15	3.18517e-12
Y38H6C.8	WBGene00012621	67.0712	3.33379	0.432824	7.70242	1.33511e-14	4.77671e-12
swt-3	WBGene00007384	172.487	-2.1384	0.279425	-7.65287	1.96536e-14	6.86006e-12
rpr-1	WBGene00045238	46.47	9.24403	1.21541	7.60567	2.83426e-14	9.65741e-12
tyr-6	WBGene00022231	305.54	-1.05271	0.138513	-7.60006	2.95994e-14	9.85109e-12
ttll-12	WBGene00008405	2642.85	0.577485	0.076398	7.55891	4.06475e-14	1.32206e-11
sodh-1	WBGene00010790	429.851	1.75002	0.232377	7.53097	5.03657e-14	1.60174e-11
ptr-18	WBGene00004232	214.984	1.75665	0.233539	7.52186	5.40026e-14	1.68007e-11
F59C12.4	WBGene00045272	92.8874	2.41286	0.324203	7.44243	9.88472e-14	3.00979e-11
ugt-16	WBGene00013901	62.4997	-1.63731	0.223223	-7.33484	2.21993e-13	6.61863e-11
C01A2.2	WBGene00007214	46.521	-2.83659	0.391245	-7.25016	4.16285e-13	1.21581e-10
B0410.3	WBGene00015172	155.407	-1.03024	0.143583	-7.1752	7.22018e-13	2.06656e-10
hsp-16.48	WBGene00002019	2932.46	8.38301	1.16969	7.16687	7.67298e-13	2.1531e-10
pept-1	WBGene00003877	1660.62	-0.727156	0.102536	-7.09172	1.32457e-12	3.64536e-10
R09B5.11	WBGene00019979	75.5293	-1.31018	0.189353	-6.91921	4.54159e-12	1.22632e-09
K02F2.11	WBGene00220000	17.4315	3.97664	0.577593	6.88485	5.78503e-12	1.53314e-09
set-31	WBGene00007615	711.737	-0.62159	0.0912904	-6.80892	9.83321e-12	2.54715e-09
F57A8.9	WBGene00197215	18.8082	8.371	1.22977	6.80698	9.96717e-12	2.54715e-09
F32H5.3	WBGene00009349	37.4443	-2.1032	0.311355	-6.75499	1.42846e-11	3.58644e-09
sta-2	WBGene00010251	102.343	-1.19008	0.17859	-6.66373	2.66968e-11	6.58722e-09
kreg-1	WBGene00018725	138.953	3.97617	0.601044	6.61544	3.70461e-11	8.98587e-09
gasr-8	WBGene00008144	16.6587	3.93786	0.596799	6.5983	4.15885e-11	9.91955e-09
Y42G9A.3	WBGene00021533	110.332	-1.24927	0.190174	-6.56908	5.06263e-11	1.18773e-08
C26D10.6	WBGene00007746	135.346	-0.860833	0.131984	-6.52224	6.92636e-11	1.59876e-08
srt-42	WBGene00021599	34.1152	4.56649	0.705224	6.47524	9.46614e-11	2.15032e-08
elo-6	WBGene00001244	3259.93	-0.893535	0.139282	-6.41528	1.40569e-10	3.14325e-08
hsp-16.49	WBGene00002020	2243.81	8.21258	1.29296	6.35175	2.12882e-10	4.6532e-08
ZC21.10	WBGene00044443	73.0842	1.39131	0.219087	6.35051	2.14598e-10	4.6532e-08
F16C3.2	WBGene00008886	46.551	-1.62235	0.257548	-6.29921	2.99161e-10	6.38999e-08
slc-25A29	WBGene00008320	80.6689	-1.10332	0.175415	-6.28975	3.1797e-10	6.69187e-08
Y37A1A.2	WBGene00012535	95.0652	-1.49803	0.238432	-6.28283	3.32472e-10	6.89567e-08
ins-30	WBGene00002113	32.8231	-2.13913	0.341649	-6.26117	3.82097e-10	7.8117e-08
atl-1	WBGene00000226	3658.22	-0.388831	0.0627938	-6.19218	5.9336e-10	1.196e-07
mct-4	WBGene00003986	698.075	-0.643351	0.104922	-6.13172	8.6935e-10	1.72795e-07
wah-1	WBGene00006937	2204.55	0.34499	0.0563597	6.12121	9.28646e-10	1.82053e-07
linc-7	WBGene00219609	696.439	0.902842	0.149152	6.05315	1.42037e-09	2.74688e-07
tre-5	WBGene00006611	108.974	1.78367	0.294914	6.04808	1.46579e-09	2.79691e-07
mdl-1	WBGene00003163	400.614	-1.07012	0.177891	-6.01558	1.79242e-09	3.37518e-07
F19B2.5	WBGene00008944	3179.62	1.8667	0.311305	5.99637	2.01777e-09	3.75016e-07
ufd-2	WBGene00006734	4504.21	-0.29168	0.0490491	-5.94669	2.73616e-09	5.02015e-07
C48B4.9	WBGene00008172	550.819	-0.474318	0.0811316	-5.84627	5.02708e-09	9.10666e-07
AC8.12	WBGene00043990	21.5704	-22.9635	3.93969	-5.82877	5.58387e-09	9.98884e-07
itr-1	WBGene00002173	1371.69	-0.691533	0.118896	-5.81628	6.01707e-09	1.06309e-06
hrg-7	WBGene00007605	1440.66	-0.677039	0.117289	-5.7724	7.81484e-09	1.36388e-06
klp-10	WBGene00002221	986.391	-0.385815	0.066954	-5.76238	8.29337e-09	1.42996e-06
T01D3.6	WBGene00011330	545.546	-0.985784	0.171258	-5.75613	8.60663e-09	1.4663e-06
T11G6.4	WBGene00011719	179.825	-0.703027	0.122854	-5.72245	1.05001e-08	1.76785e-06
F58G1.7	WBGene00010269	81.0915	1.35175	0.237171	5.69947	1.20181e-08	1.9999e-06
elo-5	WBGene00001243	2283.28	-0.639847	0.112331	-5.6961	1.22578e-08	2.01633e-06
T11F9.12	WBGene00011713	551.93	-0.563978	0.100462	-5.61382	1.97911e-08	3.21853e-06
nlp-47	WBGene00018117	65.3669	-1.23498	0.221863	-5.5664	2.60063e-08	4.18175e-06
nrf-6	WBGene00003813	1459.94	-0.666817	0.120746	-5.52248	3.34257e-08	5.31506e-06
ugt-47	WBGene00011006	473.558	-0.5954	0.108074	-5.5092	3.60463e-08	5.66877e-06
oat-1	WBGene00003837	147.035	-0.939712	0.171431	-5.48157	4.21566e-08	6.55764e-06
T27D12.1	WBGene00012085	302.954	-0.846322	0.154464	-5.47909	4.27512e-08	6.57862e-06
hsp-90	WBGene00000915	64395.5	0.28654	0.0527008	5.43712	5.41496e-08	8.244e-06
ugt-12	WBGene00020592	586.891	-0.892363	0.164567	-5.42248	5.87781e-08	8.85446e-06
fut-8	WBGene00001508	156.666	-0.813276	0.150272	-5.41204	6.23116e-08	9.28898e-06
mak-1	WBGene00010681	2638.76	-0.457374	0.084597	-5.4065	6.4267e-08	9.4817e-06
Y53F4B.7	WBGene00013154	217.313	3.57348	0.661543	5.40173	6.59998e-08	9.63799e-06
skpo-1	WBGene00009897	6250.97	0.251463	0.0467657	5.37708	7.57021e-08	1.09432e-05
rars-1	WBGene00004679	4884.84	0.218537	0.0406573	5.37511	7.65345e-08	1.09528e-05
Y54G2A.21	WBGene00021886	339.232	0.616612	0.114906	5.36624	8.03944e-08	1.13913e-05
R11A8.1	WBGene00011236	1018.14	-0.371033	0.069295	-5.3544	8.58417e-08	1.20439e-05
Y54G11A.11	WBGene00013219	1085.1	-0.38273	0.0717611	-5.33339	9.63971e-08	1.33936e-05
F47E1.2	WBGene00018566	72.987	-1.14136	0.214584	-5.31897	1.04357e-07	1.43601e-05
Y111B2A.12	WBGene00013735	1927.83	0.538105	0.101348	5.30948	1.09937e-07	1.49839e-05
linc-44	WBGene00219675	8.79836	6.81265	1.28644	5.29575	1.18532e-07	1.60029e-05
ugt-13	WBGene00019232	233.737	-1.28251	0.242466	-5.28945	1.22685e-07	1.64088e-05
scd-2	WBGene00004740	52.1922	-1.20495	0.227963	-5.28572	1.25214e-07	1.6592e-05
gpr-1	WBGene00001688	458.341	-0.498733	0.0946195	-5.27093	1.35731e-07	1.78206e-05
Y94H6A.10	WBGene00022382	1668.93	1.31242	0.25044	5.24043	1.60199e-07	2.08419e-05
snt-4	WBGene00004924	229.015	-0.748413	0.143425	-5.21816	1.80709e-07	2.32984e-05
best-17	WBGene00020559	48.06	-1.26073	0.242146	-5.20648	1.92453e-07	2.4591e-05
C16A11.4	WBGene00015817	1756.99	-0.367957	0.0710704	-5.17737	2.25037e-07	2.85e-05
fbxa-216	WBGene00012953	92.843	-0.977375	0.191003	-5.11708	3.10301e-07	3.89536e-05
C01B10.9	WBGene00015283	1560.28	-0.319341	0.0631369	-5.05791	4.23883e-07	5.27495e-05
tag-232	WBGene00044077	2200.99	-0.242112	0.0479041	-5.05409	4.32442e-07	5.33507e-05
gei-14	WBGene00001571	2119.67	-0.334968	0.0664498	-5.04092	4.63307e-07	5.667e-05
nep-22	WBGene00020788	664.194	-0.642699	0.127569	-5.03807	4.70246e-07	5.70312e-05
Y17D7C.2	WBGene00012456	32.92	4.56709	0.908006	5.0298	4.90982e-07	5.90458e-05
elo-2	WBGene00001240	2360.57	-0.432044	0.0860255	-5.02228	5.10621e-07	6.07077e-05
klp-16	WBGene00002226	2973.05	-0.351771	0.070056	-5.02128	5.13286e-07	6.07077e-05
D2096.11	WBGene00017078	592.912	0.534715	0.106803	5.00654	5.54175e-07	6.50066e-05
vps-34	WBGene00006932	1281.21	0.323661	0.0648206	4.99318	5.9394e-07	6.91047e-05
C56G2.3	WBGene00016978	471.964	0.472664	0.0947082	4.99073	6.01502e-07	6.94202e-05
Y106G6H.1	WBGene00013716	194.932	-1.02145	0.205426	-4.97237	6.61393e-07	7.55131e-05
W03G1.5	WBGene00021011	25.8921	2.06392	0.415161	4.97136	6.64849e-07	7.55131e-05
B0361.9	WBGene00015163	260.776	-0.557373	0.112561	-4.95174	7.35514e-07	8.28814e-05
C07D8.6	WBGene00015565	3532.05	0.2659	0.0537996	4.94241	7.71612e-07	8.62698e-05
F46C5.10	WBGene00009785	70.8297	-1.23798	0.250914	-4.93387	8.06176e-07	8.94355e-05
ddb-1	WBGene00010890	2932.31	0.42623	0.0865322	4.92568	8.40671e-07	9.18385e-05
C50D2.7	WBGene00016810	936.287	0.407519	0.0827121	4.92696	8.35176e-07	9.18385e-05
fbxc-1	WBGene00016649	40.1524	22.6608	4.60594	4.91991	8.65828e-07	9.31644e-05
C17F4.12	WBGene00044374	9.90437	6.18772	1.25733	4.92131	8.5967e-07	9.31644e-05
dpt-1	WBGene00008532	3019	0.230225	0.0468996	4.90889	9.15956e-07	9.78228e-05
Y57A10A.5	WBGene00013250	594.7	0.4114	0.0839434	4.90092	9.53883e-07	0.000101119
prg-2	WBGene00004179	2885.2	-0.461883	0.0946576	-4.87951	1.06348e-06	0.000111907
pcp-3	WBGene00003958	1053.36	-0.94816	0.195285	-4.85527	1.20225e-06	0.000125587
nlp-14	WBGene00003752	105.223	-0.842255	0.173713	-4.84853	1.24378e-06	0.000128984
dnj-20	WBGene00001038	4160.54	-0.453332	0.0938921	-4.82822	1.37759e-06	0.000141832
T27E4.1	WBGene00020861	42.4275	1.56528	0.325755	4.80507	1.54696e-06	0.000158133
D2023.1	WBGene00014300	91.719	-1.10521	0.230487	-4.79512	1.62577e-06	0.00016501
dos-1	WBGene00013980	42.3052	-1.36158	0.284736	-4.78191	1.73636e-06	0.000174993
T10B10.4	WBGene00011681	305.858	-0.56657	0.118539	-4.7796	1.75645e-06	0.00017578
ZC250.4	WBGene00045305	255.644	-0.862177	0.180626	-4.77329	1.81244e-06	0.000180124
F54D5.7	WBGene00010052	2182.07	0.267815	0.0562008	4.76532	1.88558e-06	0.0001861
cyp-42A1	WBGene00013585	66.8245	-1.272	0.267318	-4.75837	1.95167e-06	0.000191304
nhr-14	WBGene00003613	229.115	-0.772409	0.162573	-4.75115	2.02267e-06	0.000196914
pho-1	WBGene00004020	687.161	-0.550296	0.115945	-4.74617	2.07308e-06	0.000200459
gpr-2	WBGene00001689	692.013	-0.362263	0.0763728	-4.74335	2.10211e-06	0.000201902
F27D4.1	WBGene00009187	2975.22	0.217575	0.0459068	4.73948	2.14263e-06	0.000204421
W02D9.10	WBGene00012216	181.988	0.8527	0.180009	4.73699	2.1692e-06	0.000205585
ddo-3	WBGene00017648	2494.88	0.274639	0.0580296	4.73274	2.21505e-06	0.00020855
C15H9.5	WBGene00015801	347.392	-0.452396	0.0956492	-4.72975	2.248e-06	0.000210269
R07C12.2	WBGene00019932	172.317	-0.792086	0.167613	-4.72569	2.29333e-06	0.000213116
nhx-1	WBGene00003729	52.9513	-1.16962	0.247575	-4.72429	2.30918e-06	0.000213205
K07F5.16	WBGene00010640	114.913	0.956677	0.202808	4.71716	2.39155e-06	0.000219394
ptr-24	WBGene00004238	789.975	-0.545093	0.116082	-4.69575	2.65629e-06	0.000242128
cept-1	WBGene00009057	442.553	-0.629082	0.13403	-4.69359	2.68446e-06	0.000243147
C18H9.5	WBGene00016003	31.9232	-1.63824	0.349193	-4.69151	2.71191e-06	0.000244089
dars-1	WBGene00001094	4810.32	0.228766	0.0487768	4.69007	2.73115e-06	0.000244284
F46G10.2	WBGene00009797	157.958	-0.875959	0.187137	-4.68085	2.85686e-06	0.000253941
nol-6	WBGene00021789	992.782	0.635153	0.136243	4.66191	3.13293e-06	0.000276762
F36A2.7	WBGene00009454	5130.82	0.224242	0.048165	4.65569	3.22891e-06	0.00028349
C25E10.4	WBGene00016094	26.1679	-1.51911	0.327706	-4.63559	3.55924e-06	0.000310587
hasp-1	WBGene00007258	1041.92	-0.282021	0.0608645	-4.63359	3.59372e-06	0.000311695
Y37D8A.2	WBGene00012544	3558.54	0.428265	0.0925311	4.62834	3.68613e-06	0.000317784
C35A11.4	WBGene00016431	177.937	-0.667081	0.144199	-4.62612	3.72585e-06	0.000319285
F22E5.1	WBGene00017703	209.136	-0.840785	0.181796	-4.62487	3.74825e-06	0.000319293
ncx-7	WBGene00003572	154.526	-0.764762	0.165558	-4.6193	3.85029e-06	0.000326044
Y53F4B.8	WBGene00013155	389.793	1.44774	0.315827	4.58397	4.5624e-06	0.000381909
cif-1	WBGene00019543	4478.4	0.197122	0.043003	4.58392	4.56337e-06	0.000381909
F41C3.2	WBGene00018268	180.142	1.38344	0.302389	4.57502	4.76168e-06	0.000394117
Y38H8A.8	WBGene00045062	26.0037	1.62284	0.354726	4.57491	4.76433e-06	0.000394117
K02F2.5	WBGene00019324	142.968	-0.742905	0.162642	-4.56774	4.93021e-06	0.000405495
zip-10	WBGene00012101	158.034	1.05652	0.232128	4.55144	5.32809e-06	0.000435716
T08A9.6	WBGene00020338	63.3865	0.91335	0.20089	4.54653	5.45376e-06	0.000443459
cyp-31A1	WBGene00000374	194.418	-0.541089	0.119171	-4.54045	5.61355e-06	0.000453873
pat-4	WBGene00003931	457.716	0.35691	0.0788662	4.52551	6.0249e-06	0.000484395
catp-7	WBGene00022010	791.168	-0.586691	0.129963	-4.51431	6.35235e-06	0.000507869
pept-3	WBGene00003878	104.737	-0.67744	0.150177	-4.51093	6.45438e-06	0.00051277
ora-1	WBGene00003879	50.2503	3.39352	0.752456	4.50992	6.48531e-06	0.00051277
bgnt-1.2	WBGene00017723	20.7247	4.88858	1.08612	4.50096	6.76479e-06	0.000531928
far-1	WBGene00001385	10379.7	0.419454	0.0932204	4.49959	6.80836e-06	0.000532429
cyp-13A2	WBGene00011676	102.137	-0.764527	0.170465	-4.48495	7.29294e-06	0.000566089
nhr-241	WBGene00013483	18.7631	5.61487	1.25214	4.48423	7.3179e-06	0.000566089
psd-1	WBGene00015159	1070.9	-0.26104	0.0585742	-4.45657	8.32826e-06	0.000638163
C05D11.1	WBGene00015481	4151.69	0.279314	0.0626786	4.4563	8.33879e-06	0.000638163
F35E12.10	WBGene00009434	1167.37	-0.465883	0.104609	-4.45355	8.44622e-06	0.000642946
spe-49	WBGene00019667	57.1954	1.69416	0.381462	4.44123	8.94446e-06	0.000677271
F55B11.3	WBGene00010085	2180.87	0.429961	0.0968761	4.43825	9.06921e-06	0.000683103
T27E4.7	WBGene00020865	83.9231	-0.907404	0.204554	-4.43601	9.16415e-06	0.00068664
col-80	WBGene00000656	22037.7	0.517654	0.116757	4.4336	9.26712e-06	0.000690738
T21D12.7	WBGene00020648	29.2228	3.14159	0.709965	4.42499	9.64457e-06	0.000715147
pck-1	WBGene00021043	3759.23	0.516969	0.116977	4.41939	9.89818e-06	0.000730169
daf-7	WBGene00000903	54.6041	-1.08859	0.24656	-4.4151	1.00963e-05	0.000740963
Y74C9A.9	WBGene00235381	22.4452	1.64178	0.372444	4.40814	1.04261e-05	0.000761267
Y45F10D.7	WBGene00012887	1714.41	0.442042	0.100304	4.40702	1.04803e-05	0.000761335
F56G4.6	WBGene00010161	687.382	0.332841	0.0756639	4.39894	1.08779e-05	0.000786227
hmgs-1	WBGene00017769	555.906	-0.410414	0.0934567	-4.39149	1.12576e-05	0.000809589
ugt-26	WBGene00015695	323.58	-0.826132	0.188232	-4.38889	1.13931e-05	0.000815231
cpr-8	WBGene00021070	269.7	-0.626706	0.142919	-4.38505	1.15961e-05	0.000825629
klp-15	WBGene00002225	3130.96	-0.314598	0.0719387	-4.37314	1.22473e-05	0.000867681
rig-4	WBGene00004371	4010.98	0.614638	0.140643	4.37021	1.24127e-05	0.000875063
F57G12.1	WBGene00010221	985.002	-0.747575	0.171558	-4.35758	1.31511e-05	0.000922578
cab-1	WBGene00000277	1148.95	-0.467699	0.107474	-4.35175	1.35054e-05	0.000942809
K08D8.6	WBGene00010660	865.239	-0.780382	0.181892	-4.29036	1.78382e-05	0.00123924
cth-2	WBGene00022856	2700.92	-0.597729	0.139429	-4.28697	1.8113e-05	0.00125225
sco-1	WBGene00015297	940.178	0.273073	0.0638196	4.27883	1.87874e-05	0.00129263
C46A5.6	WBGene00016702	891.821	-0.300999	0.0704438	-4.2729	1.92949e-05	0.00132119
R05F9.6	WBGene00019890	4262.17	0.289342	0.0677466	4.27095	1.9464e-05	0.00132643
cyc-1	WBGene00000869	6039.39	0.147849	0.034667	4.26484	2.00047e-05	0.00135041
F28F8.10	WBGene00044219	27.3473	1.23073	0.288548	4.26524	1.99688e-05	0.00135041
R03D7.2	WBGene00010989	702.259	1.44888	0.340381	4.25664	2.07518e-05	0.00139426
tbc-6	WBGene00015410	162.571	-0.574716	0.135895	-4.22911	2.3462e-05	0.00156899
aho-3	WBGene00045192	2632.63	-0.194094	0.0460618	-4.21378	2.51136e-05	0.00167163
csq-1	WBGene00000822	3536.19	0.473982	0.112844	4.20031	2.66546e-05	0.00176599
snet-1	WBGene00015354	110.963	-0.76103	0.181485	-4.19336	2.74855e-05	0.00181265
ucr-2.1	WBGene00012158	2014.28	0.312992	0.0747892	4.18499	2.85177e-05	0.00187209
far-2	WBGene00001386	45646.7	0.398856	0.0953341	4.18377	2.86712e-05	0.00187358
atf-2	WBGene00000220	173.106	1.39765	0.334148	4.18272	2.88048e-05	0.00187375
zig-3	WBGene00006980	57.0619	-0.930299	0.222803	-4.17544	2.97407e-05	0.00192588
aat-6	WBGene00000007	98.5962	-0.877525	0.210588	-4.16703	3.08599e-05	0.00198935
pck-2	WBGene00011232	17076.7	0.304825	0.0732174	4.16329	3.13695e-05	0.00201313
F41C3.5	WBGene00018271	9955.47	0.342113	0.0823931	4.1522	3.29293e-05	0.0021038
F58B4.3	WBGene00010236	24.1816	-1.57997	0.38079	-4.14919	3.33658e-05	0.00212221
ptr-8	WBGene00004222	186.197	-0.609499	0.146961	-4.14734	3.36357e-05	0.00212522
clec-56	WBGene00008595	429.158	-0.579182	0.139702	-4.14583	3.38586e-05	0.00212522
famk-1	WBGene00010356	375.719	-0.40677	0.0981001	-4.14647	3.37635e-05	0.00212522
ugt-65	WBGene00008583	77.4186	-0.708006	0.170969	-4.14114	3.45585e-05	0.00215968
gsr-1	WBGene00008117	4033.12	0.246678	0.0596425	4.13594	3.53497e-05	0.00219952
VM106R.1	WBGene00014848	33.726	-1.04287	0.25222	-4.13477	3.55315e-05	0.00220126
cct-6	WBGene00000381	7759.39	0.199241	0.0483439	4.12132	3.76713e-05	0.00232114
ule-1	WBGene00021005	2907.68	0.48757	0.118325	4.12059	3.77909e-05	0.00232114
M28.5	WBGene00010896	5998.42	-0.221589	0.0538768	-4.11288	3.90752e-05	0.00238976
cars-1	WBGene00000800	4761.42	0.227608	0.0553713	4.11058	3.94661e-05	0.00239957
cutl-15	WBGene00011888	31.921	-1.34154	0.326412	-4.10997	3.95708e-05	0.00239957
pgph-2	WBGene00018424	898.441	-0.39977	0.0975146	-4.0996	4.1387e-05	0.00249171
lin-65	WBGene00022149	1791.15	0.568817	0.138759	4.09931	4.14385e-05	0.00249171
K06G5.1	WBGene00010605	3107.51	-0.652109	0.159445	-4.08988	4.31596e-05	0.00258419
rha-2	WBGene00015525	1051.12	0.54393	0.133025	4.08892	4.33377e-05	0.00258419
Y7A9D.1	WBGene00012420	59.9485	-1.82082	0.446922	-4.07414	4.61854e-05	0.00274257
C35D10.7	WBGene00016444	1602.95	-0.255631	0.0627678	-4.07265	4.64806e-05	0.00274869
ZK813.1	WBGene00022820	4087.55	0.442911	0.108832	4.06968	4.70771e-05	0.00277251
dkf-1	WBGene00012352	410.415	0.356641	0.0877019	4.06651	4.7722e-05	0.00279897
fkb-6	WBGene00001431	5378.5	0.246425	0.0606317	4.0643	4.81777e-05	0.00280646
mut-7	WBGene00003504	2609.56	-0.265901	0.0654286	-4.06399	4.82418e-05	0.00280646
hil-2	WBGene00001853	1147.59	-0.82477	0.203123	-4.06046	4.89771e-05	0.00283769
nhx-2	WBGene00003730	655.178	-0.391829	0.0968173	-4.0471	5.18561e-05	0.00298677
Y37E11B.5	WBGene00021377	699.254	0.445387	0.110065	4.0466	5.19674e-05	0.00298677
Y73F8A.24	WBGene00013529	792.446	0.300866	0.0743779	4.04511	5.22995e-05	0.00299383
tos-1	WBGene00019466	7345.72	0.504591	0.124888	4.04034	5.33746e-05	0.0030432
ngn-1	WBGene00003595	17.9181	-2.79095	0.691325	-4.03711	5.41148e-05	0.00306771
ipgm-1	WBGene00019001	4128.45	0.268347	0.0664785	4.03659	5.42331e-05	0.00306771
nas-7	WBGene00003526	37.184	-1.17437	0.291043	-4.03505	5.45907e-05	0.00307578
clx-1	WBGene00000551	8.64302	5.28071	1.31028	4.0302	5.5729e-05	0.0031276
memi-2	WBGene00013380	1627.57	-0.296776	0.0736756	-4.02814	5.62199e-05	0.00314282
bath-34	WBGene00012195	145.17	0.605104	0.150389	4.02358	5.73189e-05	0.00319179
aat-2	WBGene00000003	124.419	-0.717984	0.178569	-4.02076	5.80116e-05	0.00321784
ptr-13	WBGene00004227	375.472	-0.485385	0.120818	-4.01748	5.88234e-05	0.00325028
tep-1	WBGene00013969	1376.73	0.484414	0.120855	4.00823	6.1176e-05	0.00336727
enol-1	WBGene00011884	14517.6	0.252122	0.062957	4.00467	6.21033e-05	0.00340521
col-119	WBGene00000693	58422.7	0.437581	0.109434	3.99857	6.37252e-05	0.00348081
atp-3	WBGene00000230	7581.68	0.204033	0.0510658	3.99548	6.45627e-05	0.00349984
C17G10.7	WBGene00015919	20.4615	-1.77386	0.443941	-3.99572	6.44983e-05	0.00349984
tom-1	WBGene00006594	344.633	-0.555223	0.13904	-3.99327	6.51673e-05	0.00351928
ZK809.9	WBGene00194934	28.705	1.29206	0.323674	3.99187	6.55544e-05	0.00352688
lips-9	WBGene00010267	13.6271	5.09119	1.27597	3.99004	6.60609e-05	0.00354082
ent-4	WBGene00008123	214.018	-0.754654	0.189598	-3.98029	6.88323e-05	0.00367559
C49F5.6	WBGene00008210	1272.72	0.342049	0.086072	3.97398	7.06801e-05	0.00376023
E01G6.1	WBGene00008449	32.5141	5.10532	1.28997	3.9577	7.56734e-05	0.00401097
Y73B6A.6	WBGene00044503	26.7951	2.11248	0.5341	3.95521	7.64669e-05	0.00403807
col-143	WBGene00000716	19014.3	0.515751	0.130559	3.95032	7.80462e-05	0.00410632
wrt-1	WBGene00006947	135.88	1.5455	0.393256	3.93001	8.49431e-05	0.00445282
spr-1	WBGene00005006	1288.29	-0.323711	0.0824686	-3.92526	8.66357e-05	0.00452498
C46F2.1	WBGene00016714	86.7656	-0.839633	0.21415	-3.92077	8.82647e-05	0.0045933
mep-1	WBGene00003218	4377.56	-0.270902	0.0691544	-3.91735	8.95294e-05	0.00459679
mut-14	WBGene00003507	1036.28	-0.279625	0.0713855	-3.91711	8.96166e-05	0.00459679
rpn-10	WBGene00004466	2811.38	0.201028	0.0513192	3.91721	8.95797e-05	0.00459679
eef-1G	WBGene00008920	40582.5	0.181577	0.0463297	3.91924	8.88292e-05	0.00459679
ZC116.3	WBGene00013855	150.094	-0.932121	0.238146	-3.91407	9.07515e-05	0.00463837
Y43E12A.2	WBGene00012794	160.891	0.60904	0.155734	3.91077	9.20013e-05	0.00468552
fard-1	WBGene00022200	960.771	-0.355628	0.0909751	-3.90907	9.26511e-05	0.00470188
C10G11.6	WBGene00015686	765.623	0.408082	0.104427	3.90782	9.31312e-05	0.00470954
ceh-20	WBGene00000443	283.495	-0.836054	0.214903	-3.89038	0.000100086	0.0050434
htp-1	WBGene00002032	1445.37	-0.350614	0.0902331	-3.88564	0.00010206	0.00512483
Y38C1BA.1	WBGene00021410	40.1197	0.949011	0.24443	3.88255	0.000103367	0.00517235
flp-16	WBGene00001459	79.3875	-0.834885	0.215167	-3.88017	0.000104385	0.00520508
rpoa-1	WBGene00012999	1779.76	0.635084	0.163729	3.87888	0.000104938	0.00521445
tatn-1	WBGene00009628	2675.66	0.641392	0.165429	3.87714	0.000105694	0.0052158
tald-1	WBGene00021286	2928.46	0.234477	0.0604728	3.87739	0.000105583	0.0052158
rgef-1	WBGene00009100	28.4177	-1.12394	0.29013	-3.8739	0.000107107	0.00526741
Y59C2A.1	WBGene00021984	202.29	0.445145	0.114949	3.87256	0.000107697	0.00527826
smf-3	WBGene00004878	28.7758	-1.04674	0.271008	-3.8624	0.000112277	0.00546848
T18D3.6	WBGene00011823	199.999	0.594361	0.153889	3.86226	0.000112342	0.00546848
lgc-47	WBGene00009799	31.094	-1.51051	0.392133	-3.85204	0.000117137	0.00568251
rps-1	WBGene00004470	34273.5	0.192542	0.050007	3.85031	0.000117967	0.00569646
pde-3	WBGene00008443	224.881	0.710097	0.184451	3.84979	0.00011822	0.00569646
rps-3	WBGene00004472	28732.7	0.185509	0.0483755	3.83477	0.000125684	0.00602106
F20D1.3	WBGene00008975	1602.6	0.359714	0.093829	3.83372	0.000126219	0.00602106
F10E7.9	WBGene00017350	98.6124	-0.78244	0.204073	-3.83411	0.000126019	0.00602106
fbxb-96	WBGene00016886	18.1465	-2.23408	0.58296	-3.83231	0.000126948	0.00603572
sesn-1	WBGene00022279	657.273	-0.485865	0.126833	-3.83074	0.00012776	0.00605424
perm-2	WBGene00016636	13876.7	0.27765	0.0725122	3.82901	0.000128661	0.0060768
lin-14	WBGene00003003	528.336	-0.675129	0.176445	-3.82629	0.00013009	0.00612409
Y75B8A.25	WBGene00013558	1426.12	0.38545	0.100818	3.82325	0.000131706	0.0061798
Y45G12B.3	WBGene00021564	670.36	0.373133	0.0977373	3.81772	0.000134692	0.00629927
Y92H12A.4	WBGene00022360	1398.45	0.519791	0.136519	3.80746	0.000140404	0.00654502
ugt-4	WBGene00013905	51.1932	-0.954707	0.250813	-3.80645	0.000140977	0.00655041
his-37	WBGene00001911	513.782	0.503788	0.132384	3.80551	0.000141515	0.00655411
R05D3.2	WBGene00019877	2015.2	-0.23597	0.0621436	-3.79717	0.000146358	0.00675653
hex-2	WBGene00015767	297.613	-0.715869	0.188624	-3.79523	0.000147509	0.00678779
F02H6.4	WBGene00008537	718.587	0.459308	0.121304	3.78643	0.000152829	0.00699962
snpc-3.1	WBGene00015098	262.828	-0.422584	0.111617	-3.786	0.000153091	0.00699962
R07E3.4	WBGene00011105	237.649	-0.71141	0.187991	-3.78427	0.00015416	0.00702604
C25E10.5	WBGene00016095	67.6628	-0.834327	0.220692	-3.78051	0.000156511	0.00711055
F43G6.3	WBGene00009656	373.959	-0.377846	0.100014	-3.77794	0.000158128	0.00716132
mnr-1	WBGene00012184	378.902	-0.413603	0.109624	-3.77294	0.000161338	0.0072836
scav-6	WBGene00008542	103.832	-0.751681	0.199559	-3.7667	0.000165417	0.0074443
F08G2.5	WBGene00008577	662.323	1.60502	0.426423	3.76392	0.000167269	0.00750402
tag-196	WBGene00007055	1337.54	0.298153	0.0793079	3.75944	0.000170294	0.00761585
ZK1240.8	WBGene00022872	69.7354	4.0578	1.08106	3.75353	0.000174363	0.00777355
unc-18	WBGene00006757	882.474	-0.282452	0.0753139	-3.75033	0.000176599	0.00784448
atp-5	WBGene00007385	8421.57	0.168988	0.0450671	3.74969	0.00017705	0.00784448
ugt-23	WBGene00007650	384.119	-0.560737	0.149584	-3.74865	0.000177788	0.00785286
C35C5.10	WBGene00007959	226.745	-0.656741	0.175321	-3.74592	0.000179732	0.00791429
F01G4.6	WBGene00008505	19285.4	0.203551	0.054514	3.73392	0.00018852	0.0082582
F22F7.8	WBGene00194908	218.72	-0.649452	0.173944	-3.73369	0.000188696	0.0082582
M117.1	WBGene00010918	284.007	-0.532829	0.142791	-3.73152	0.000190326	0.00828848
hir-1	WBGene00016059	254.6	-0.44161	0.118355	-3.73123	0.000190546	0.00828848
trr-1	WBGene00007028	4754.61	0.661436	0.177584	3.72465	0.000195589	0.00846561
F02A9.10	WBGene00303021	3745.77	0.2062	0.0553651	3.72437	0.000195802	0.00846561
kat-1	WBGene00002183	5295.1	0.262371	0.0705148	3.72079	0.000198597	0.0085606
abcf-3	WBGene00018339	4196.18	0.230279	0.062075	3.70969	0.000207516	0.00891822
cgt-3	WBGene00019127	2993.29	-0.217476	0.0586583	-3.7075	0.000209314	0.00896853
his-7	WBGene00001881	8.83138	3.12195	0.843398	3.70163	0.000214219	0.00909217
rde-1	WBGene00004323	2168.34	-0.24981	0.0674978	-3.70101	0.000214741	0.00909217
srp-1	WBGene00005642	307.262	0.405155	0.109425	3.70258	0.00021342	0.00909217
hip-1	WBGene00011735	5176.96	0.2067	0.0558283	3.70243	0.000213547	0.00909217
kca-1	WBGene00015698	2670.91	-0.242147	0.0654792	-3.69808	0.00021724	0.00917088
K07C11.7	WBGene00019479	599.473	-0.497666	0.134632	-3.6965	0.000218594	0.00920087
igcm-1	WBGene00018215	100.602	-1.91061	0.517099	-3.69486	0.000220011	0.00923338
pro-3	WBGene00012676	1481.68	0.417413	0.113079	3.69134	0.000223075	0.00933457
unc-87	WBGene00006819	9235.37	0.390078	0.105709	3.69011	0.000224159	0.00935258
fkb-5	WBGene00001430	481.164	-0.39078	0.105942	-3.68862	0.000225475	0.00938016
R193.2	WBGene00020128	922.503	-0.810022	0.219952	-3.68271	0.000230765	0.0095724
nlp-68	WBGene00011899	19.0788	-1.32269	0.359657	-3.67764	0.000235406	0.0097367
T05C3.6	WBGene00020256	250.679	-0.503954	0.137294	-3.67062	0.000241967	0.0099792
gem-1	WBGene00008214	147.72	-0.677376	0.184618	-3.66906	0.000243442	0.0100112
C13G3.1	WBGene00007553	129.55	0.627641	0.171178	3.66661	0.000245792	0.0100789
ZK287.1	WBGene00013962	95.4239	-1.39948	0.38178	-3.66567	0.00024669	0.0100868
twk-1	WBGene00006656	181.713	-0.478684	0.130948	-3.65552	0.000256659	0.0104645
gsy-1	WBGene00001793	4220.1	0.232756	0.0637477	3.65121	0.000261009	0.0105816
mrps-31	WBGene00007859	847.145	0.335428	0.0918577	3.65161	0.000260602	0.0105816
rps-7	WBGene00004476	29353.3	0.168053	0.0460539	3.64904	0.000263218	0.010641
spp-10	WBGene00004995	3402.13	0.22156	0.0607659	3.64612	0.00026623	0.0107023
sars-1	WBGene00005663	4602.62	0.169442	0.0464631	3.64681	0.000265518	0.0107023
F43G6.8	WBGene00009660	119.283	0.520718	0.142984	3.6418	0.000270739	0.0108531
rpl-3	WBGene00004414	63176.5	0.170684	0.0469642	3.63434	0.000278694	0.0111407
unc-86	WBGene00006818	33.5654	-1.95711	0.538686	-3.63312	0.000280017	0.0111624
rpl-7	WBGene00004418	37489.1	0.181935	0.0501208	3.62993	0.000283501	0.0112491
Y53F4B.26	WBGene00013172	94.3603	5.22765	1.44053	3.62898	0.000284547	0.0112491
F19B2.12	WBGene00194812	61.0292	-1.05267	0.290047	-3.62931	0.000284176	0.0112491
T27A10.6	WBGene00020846	216.95	0.543119	0.149761	3.62658	0.000287201	0.0113227
rhr-1	WBGene00004358	1760.04	-0.344725	0.0951201	-3.6241	0.000289967	0.0114003
acp-7	WBGene00022246	134.479	-0.597862	0.165011	-3.62316	0.000291029	0.0114107
mec-7	WBGene00003171	215.013	0.433071	0.119559	3.62224	0.000292064	0.01142
tnt-2	WBGene00006587	13046.3	0.578399	0.159755	3.62055	0.000293982	0.0114637
Y32F6B.1	WBGene00012531	252.972	-0.483576	0.133592	-3.6198	0.000294832	0.0114656
pat-12	WBGene00003936	1944.66	0.392309	0.10865	3.61076	0.000305299	0.0118137
K02D3.1	WBGene00010504	18.315	-1.58795	0.439797	-3.61065	0.000305434	0.0118137
hmgr-1	WBGene00017268	1410.72	-0.234663	0.0650693	-3.60636	0.000310524	0.0119782
C08E8.10	WBGene00077692	56.3836	0.867826	0.240794	3.60402	0.000313327	0.0120538
nhr-68	WBGene00003658	526.333	-0.621984	0.172631	-3.60297	0.000314602	0.0120704
H01G02.3	WBGene00010350	48.5017	-0.816599	0.226971	-3.5978	0.000320915	0.0122797
acd-2	WBGene00016066	102.827	-0.623262	0.173401	-3.59434	0.000325209	0.0123778
T03D3.5	WBGene00020183	284.032	-0.847158	0.235689	-3.59439	0.000325147	0.0123778
H10D12.2	WBGene00019176	30.093	-0.959768	0.267529	-3.58753	0.000333824	0.012672
col-101	WBGene00000675	22910.1	0.357798	0.100121	3.57367	0.000352012	0.0133271
gpd-2	WBGene00001684	5868.94	0.396959	0.111283	3.56712	0.000360931	0.0136287
Y92H12BR.3	WBGene00022369	4378.82	0.196425	0.0550993	3.56493	0.00036395	0.0137065
F53F4.12	WBGene00009994	681.277	-0.252389	0.070843	-3.56265	0.000367128	0.01379
glh-1	WBGene00001598	10204	-0.197388	0.0554933	-3.55697	0.000375163	0.0139886
F37H8.5	WBGene00009514	1479	0.364416	0.102455	3.55684	0.000375349	0.0139886
nlp-43	WBGene00016684	22.7355	-1.26467	0.355462	-3.55781	0.000373963	0.0139886
sdhb-1	WBGene00006433	3045.09	0.195981	0.0552596	3.54655	0.000390308	0.0144333
bath-43	WBGene00011815	1782.24	0.278321	0.0784581	3.54739	0.000389068	0.0144333
W07B8.4	WBGene00021072	24.3528	2.81568	0.793859	3.54683	0.000389892	0.0144333
K08C7.1	WBGene00010646	171.654	-0.574021	0.162128	-3.54055	0.0003993	0.0147278
Y54E10A.10	WBGene00021830	1378.38	0.251038	0.070968	3.53735	0.000404169	0.0148691
prx-6	WBGene00004195	128.179	-0.508401	0.143784	-3.53587	0.000406434	0.0149141
clec-218	WBGene00020938	192.781	-0.866557	0.245456	-3.53039	0.000414946	0.0151875
mrp-3	WBGene00003409	305.059	-0.415591	0.117764	-3.52903	0.000417082	0.0152267
pho-14	WBGene00020471	986.369	0.314173	0.0891003	3.52606	0.000421798	0.0153597
R09A8.9	WBGene00219278	96.5865	0.768767	0.218228	3.52276	0.000427077	0.0155124
pcca-1	WBGene00017864	4125.02	0.27527	0.0782042	3.51989	0.000431727	0.0156416
R08F11.1	WBGene00019965	576.415	0.493689	0.140292	3.51902	0.000433138	0.0156531
R07A4.2	WBGene00011073	15.4292	-1.63048	0.464542	-3.50987	0.000448332	0.0161614
nduf-2.2	WBGene00006463	2614.81	0.204473	0.058284	3.50821	0.000451134	0.0162215
perm-4	WBGene00016638	19941.9	0.366379	0.104456	3.5075	0.000452337	0.016224
scav-4	WBGene00008692	181.077	-0.567801	0.162183	-3.50099	0.000463541	0.0165843
F45E1.5	WBGene00018466	10.0516	-2.04858	0.585417	-3.49935	0.000466389	0.0166446
mlc-2	WBGene00003370	10755.1	0.36213	0.103544	3.49734	0.000469914	0.0166872
#N/A	WBGene00305980	58.137	0.942675	0.269505	3.4978	0.000469114	0.0166872
got-2.2	WBGene00015778	3020.54	0.196852	0.0564152	3.48934	0.000484213	0.0171524
epg-2	WBGene00021468	1118.05	-0.799459	0.229162	-3.48862	0.00048553	0.0171566
pfs-2	WBGene00011051	2194.63	0.409852	0.117517	3.48759	0.000487394	0.01718
hil-8	WBGene00001859	22.6904	-1.85846	0.533278	-3.48497	0.000492185	0.0173063
nduo-1	WBGene00010959	8416.31	0.376806	0.108427	3.47521	0.00051045	0.0179045
gln-4	WBGene00001605	8.33224	1.6351	0.470677	3.47392	0.000512909	0.0179261
tag-72	WBGene00006447	961.7	0.197036	0.0567318	3.47312	0.000514444	0.0179261
Y50E8A.12	WBGene00013055	33.8615	2.14964	0.619279	3.47119	0.000518148	0.0179261
Y116F11A.4	WBGene00014615	8.7983	-4.6118	1.32882	-3.4706	0.000519296	0.0179261
mrpl-45	WBGene00022493	1198.79	0.270253	0.0778756	3.47032	0.000519834	0.0179261
D1086.11	WBGene00044081	4029.45	0.381403	0.109848	3.4721	0.00051641	0.0179261
C09G1.7	WBGene00284856	31.3522	1.60193	0.461441	3.47159	0.000517388	0.0179261
ptr-14	WBGene00004228	216.489	-0.527531	0.152249	-3.46494	0.000530358	0.0181578
acs-5	WBGene00013575	1104.94	-0.310709	0.0896573	-3.46552	0.000529207	0.0181578
dmsr-7	WBGene00016428	14.0979	-1.27993	0.36938	-3.46508	0.000530072	0.0181578
F26A3.4	WBGene00009142	318.339	-0.449196	0.129844	-3.4595	0.000541189	0.0184844
acly-1	WBGene00016995	3460.46	0.480744	0.139058	3.45716	0.000545907	0.0186011
Y75B8A.7	WBGene00013544	1370.37	0.437497	0.126632	3.45486	0.000550573	0.0187155
T06E6.1	WBGene00011538	1335.89	-0.178702	0.0517512	-3.4531	0.000554194	0.0187496
T06E6.10	WBGene00011540	156.249	0.523389	0.151569	3.45314	0.000554094	0.0187496
dmd-7	WBGene00019521	936.336	-0.39239	0.113813	-3.44769	0.000565403	0.0190837
C17F4.7	WBGene00015913	17345.9	-0.370432	0.107474	-3.4467	0.00056748	0.0191087
bub-1	WBGene00000275	4928.28	-0.195454	0.0567209	-3.44589	0.000569191	0.0191213
cct-4	WBGene00000379	7163.09	0.186536	0.0541945	3.44198	0.00057748	0.0193544
F23C8.5	WBGene00017734	2973.52	0.188182	0.0547494	3.43716	0.000587847	0.0196558
eef-1A.1	WBGene00001168	203650	0.259374	0.0755027	3.4353	0.000591909	0.0197455
F26E4.3	WBGene00009158	252.931	-0.409571	0.119404	-3.43012	0.000603311	0.020079
Y73E7A.2	WBGene00022269	556.813	0.309484	0.0902627	3.4287	0.000606483	0.0201378
M01F1.3	WBGene00010809	942.707	0.219539	0.0640497	3.42764	0.000608855	0.0201697
ZC376.2	WBGene00013874	397.642	-0.429092	0.125291	-3.42477	0.000615328	0.0203371
brp-1	WBGene00000273	5647.42	0.394577	0.115242	3.42389	0.000617325	0.0203561
smp-2	WBGene00004890	439.221	-0.449244	0.13127	-3.42229	0.000620955	0.0204287
rpoa-2	WBGene00008781	3044.8	0.376049	0.110003	3.41854	0.000629581	0.020665
flp-7	WBGene00001450	47.6285	-0.798941	0.234084	-3.41305	0.000642394	0.0210373
F52D2.12	WBGene00219451	630.482	0.572196	0.168492	3.39598	0.000683843	0.0223435
pat-10	WBGene00003934	13933.8	0.361605	0.106579	3.39283	0.000691739	0.0225501
clec-10	WBGene00015403	226.316	-0.427969	0.126207	-3.39102	0.000696339	0.0226484
F38A1.8	WBGene00009521	1718.66	0.221932	0.0655316	3.38663	0.000707556	0.0229091
sdha-2	WBGene00016392	3728.1	0.241301	0.0712408	3.38712	0.000706296	0.0229091
ent-2	WBGene00010701	1447.5	-0.294548	0.087009	-3.38526	0.000711103	0.022972
npp-12	WBGene00003798	7942.25	0.239181	0.0706707	3.38443	0.000713251	0.0229895
Y37E3.17	WBGene00021355	4752.88	0.212175	0.0627041	3.38375	0.000715025	0.0229949
Y47G6A.18	WBGene00021644	1177.18	0.39975	0.118217	3.38148	0.000720969	0.0231114
fbxb-66	WBGene00044066	37.1533	-1.91378	0.566017	-3.38113	0.000721878	0.0231114
arl-7	WBGene00000191	11.3279	-2.12299	0.628701	-3.37678	0.000733391	0.0233754
C47E8.11	WBGene00044180	9.54177	2.04639	0.60592	3.37733	0.000731943	0.0233754
sad-1	WBGene00004719	72.3572	-0.983215	0.291659	-3.37111	0.000748652	0.0238088
folt-2	WBGene00018138	8054.06	-0.289748	0.0861495	-3.36332	0.000770113	0.024437
T03G6.3	WBGene00020195	629.087	0.32465	0.0965707	3.36179	0.000774391	0.0244643
Y55F3AM.21	WBGene00219399	26.0295	1.53075	0.455288	3.36215	0.000773382	0.0244643
col-178	WBGene00000751	32845.4	0.339943	0.101149	3.36082	0.000777113	0.0244962
ced-11	WBGene00000425	133.533	-0.778073	0.231604	-3.3595	0.000780824	0.0245591
F02D8.4	WBGene00008521	283.595	-0.433559	0.129144	-3.35717	0.000787442	0.0247129
Y46E12BL.2	WBGene00021595	1732.46	0.525566	0.15658	3.35653	0.000789262	0.0247158
cas-1	WBGene00000294	1407.33	0.226749	0.0676032	3.35412	0.000796178	0.0248609
gpd-3	WBGene00001685	8024.95	0.353821	0.105623	3.34984	0.000808576	0.0248609
ifc-1	WBGene00002055	262.105	-0.422641	0.126169	-3.3498	0.000808695	0.0248609
srw-71	WBGene00005818	15.1263	4.57811	1.36583	3.3519	0.000802594	0.0248609
alkb-8	WBGene00007581	1193.49	0.310484	0.0926873	3.3498	0.000808686	0.0248609
cut-4	WBGene00008482	19.0482	-1.33594	0.398644	-3.35121	0.000804593	0.0248609
C53H9.2	WBGene00016907	3935.05	-0.215401	0.0642994	-3.34997	0.000808194	0.0248609
atp-4	WBGene00020275	3560.98	0.201312	0.060102	3.34952	0.00080953	0.0248609
Y54F10BM.9	WBGene00021863	359.495	0.388187	0.115864	3.35038	0.00080701	0.0248609
B0454.5	WBGene00015196	62.8668	-0.791025	0.236226	-3.34859	0.000812246	0.0248909
rpl-16	WBGene00004428	24526.6	0.189393	0.0566969	3.34044	0.000836454	0.025578
unc-60	WBGene00006794	1010.45	0.359915	0.107842	3.33742	0.00084559	0.0258022
nhr-3	WBGene00003602	363.518	-0.477591	0.143161	-3.33605	0.000849782	0.025875
Y49A3A.3	WBGene00013026	509.285	0.291243	0.0873341	3.33482	0.000853556	0.0259347
mrps-10	WBGene00012556	517.199	0.286478	0.0859242	3.33408	0.000855834	0.0259488
mlc-3	WBGene00003371	8658.73	0.346854	0.104095	3.33211	0.000861907	0.0260262
twk-42	WBGene00006692	94.4609	0.575907	0.172838	3.33207	0.000862024	0.0260262
klc-1	WBGene00002214	3808.78	-0.261649	0.0785846	-3.32952	0.000869956	0.0261798
C16A11.10	WBGene00185089	310.067	-0.337278	0.101307	-3.32926	0.000870769	0.0261798
Y46H3C.6	WBGene00021606	25.5183	-1.16216	0.349372	-3.32642	0.000879699	0.0263928
M106.3	WBGene00010911	2252.08	0.214605	0.0645405	3.32512	0.000883812	0.0264055
F23F12.3	WBGene00017751	62.8545	-0.821065	0.246894	-3.32558	0.000882341	0.0264055
F17E5.2	WBGene00008924	250.805	-0.364644	0.10981	-3.32068	0.000897973	0.026692
sptl-3	WBGene00011932	1866.6	-0.247893	0.0746455	-3.32094	0.000897154	0.026692
C13F10.7	WBGene00015746	1207.78	-0.283269	0.0853126	-3.32037	0.000898998	0.026692
fbxa-92	WBGene00022496	39.4577	0.869336	0.261949	3.31872	0.000904306	0.026794
fbxb-84	WBGene00020544	48.89	-1.28195	0.386489	-3.31691	0.000910179	0.0269123
tag-180	WBGene00007041	57.858	-0.828349	0.249894	-3.3148	0.000917083	0.0270213
T16G12.4	WBGene00011805	278.219	-0.528112	0.159401	-3.3131	0.000922675	0.0270213
pho-7	WBGene00011879	120.676	0.549856	0.165977	3.31285	0.000923513	0.0270213
sec-15	WBGene00016188	446.424	0.314735	0.094986	3.31349	0.000921388	0.0270213
M162.12	WBGene00050946	38.3113	0.783789	0.236573	3.31309	0.000922705	0.0270213
F07E5.13	WBGene00304173	18.4867	-2.18989	0.66113	-3.31234	0.000925195	0.0270213
usp-14	WBGene00006856	5085.05	0.199162	0.0601545	3.31084	0.000930162	0.027056
T19C3.5	WBGene00020563	148.317	0.596559	0.18018	3.3109	0.000929961	0.027056
hrpl-1	WBGene00016624	950.488	0.226975	0.0687759	3.30021	0.00096611	0.0280446
F44E2.8	WBGene00018421	2915.22	0.169109	0.0512754	3.29805	0.000973598	0.0282048
T12E12.3	WBGene00020464	975.695	-0.317874	0.0965467	-3.29244	0.000993231	0.0287154
F13G3.7	WBGene00008767	834.825	0.27531	0.0836419	3.29153	0.000996451	0.0287504
acr-16	WBGene00000055	46.1741	-0.71907	0.21863	-3.28899	0.00100549	0.0289046
sdz-30	WBGene00011432	182.06	-0.94423	0.287097	-3.28889	0.00100583	0.0289046
fars-3	WBGene00001498	3242.39	0.203059	0.0618565	3.28273	0.00102806	0.0293522
rpl-19	WBGene00004431	19850.7	0.176731	0.0538437	3.28231	0.00102962	0.0293522
F44D12.2	WBGene00009679	148.268	0.486233	0.148112	3.28286	0.00102758	0.0293522
lgc-28	WBGene00044301	43.9893	0.773549	0.235647	3.28266	0.00102831	0.0293522
unc-85	WBGene00006817	1365.19	-0.306127	0.0933581	-3.27906	0.00104154	0.0296332
col-122	WBGene00000696	35135.4	0.420195	0.128204	3.27756	0.00104709	0.0297318
C55B7.3	WBGene00016942	332.928	0.728664	0.222605	3.27335	0.0010628	0.0301184
dct-10	WBGene00012618	45.5666	1.61248	0.492735	3.2725	0.00106599	0.0301491
F13B6.3	WBGene00017418	102.269	-0.54145	0.165547	-3.27068	0.0010729	0.0302845
oct-2	WBGene00003843	96.8024	-0.606337	0.185702	-3.2651	0.00109424	0.0308261
air-2	WBGene00000099	1506.14	-0.20633	0.0632222	-3.26357	0.00110017	0.0309322
C05D9.3	WBGene00015472	290.399	0.367531	0.112668	3.26206	0.00110605	0.0310365
M01H9.2	WBGene00019718	34.651	1.40409	0.431109	3.25693	0.00112623	0.0315411
cyn-6	WBGene00000882	242.693	-0.559821	0.172089	-3.2531	0.00114154	0.0319073
C24B5.1	WBGene00016044	10.6875	-1.66537	0.512431	-3.24994	0.00115429	0.0322007
srh-70	WBGene00005291	53.5835	1.41302	0.435295	3.24612	0.0011699	0.0325453
clec-145	WBGene00013013	26.3568	1.03698	0.319482	3.24581	0.00117118	0.0325453
tank-1	WBGene00004053	1885.42	0.745814	0.229872	3.24448	0.00117667	0.0325711
F48E8.3	WBGene00018610	1536.38	0.174089	0.0536486	3.24498	0.00117458	0.0325711
nol-14	WBGene00021660	1206.03	0.413966	0.127706	3.24156	0.00118878	0.032843
cct-5	WBGene00000380	9621.79	0.174159	0.0537664	3.23917	0.00119878	0.0330554
bath-35	WBGene00012196	58.5517	-0.687771	0.212459	-3.2372	0.00120709	0.0332206
rpn-3	WBGene00004460	7696.68	0.138141	0.042682	3.23651	0.00121002	0.0332373
cct-1	WBGene00000377	7997.85	0.197609	0.061075	3.23551	0.00121426	0.0332897
C24A1.3	WBGene00016030	149.7	-0.547499	0.169324	-3.23343	0.00122311	0.0334684
gcy-21	WBGene00001546	34.8267	-1.00442	0.3109	-3.23069	0.0012349	0.0337264
C08F1.10	WBGene00015613	104.829	-1.32547	0.411488	-3.22116	0.00127673	0.0348023
F10G7.9	WBGene00017372	1970.52	0.229053	0.0711621	3.21875	0.0012875	0.0350294
Y53G8AL.1	WBGene00021799	60.1462	1.32143	0.410727	3.21729	0.00129407	0.0351411
M05D6.10	WBGene00044168	13.3324	4.22585	1.31523	3.21302	0.00131347	0.0356005
saeg-1	WBGene00010012	1086.66	-0.368235	0.114721	-3.20984	0.00132809	0.0356974
nlp-67	WBGene00011227	28.701	-0.992366	0.309081	-3.2107	0.00132413	0.0356974
ZK593.9	WBGene00014005	22.5759	1.27818	0.398055	3.21107	0.00132242	0.0356974
cht-3	WBGene00016084	7089.65	0.316379	0.0985487	3.21039	0.00132556	0.0356974
F56C9.7	WBGene00018951	1199.09	-0.38794	0.12089	-3.20904	0.00133181	0.0356974
K08B4.7	WBGene00023486	63.2703	0.840343	0.261871	3.20899	0.00133201	0.0356974
K02H11.4	WBGene00019348	8.52181	2.06303	0.643055	3.20817	0.00133584	0.035733
ctps-1	WBGene00012316	4132.41	0.271214	0.0847235	3.20116	0.00136874	0.0365448
lev-11	WBGene00002978	17405.3	0.418437	0.130787	3.19937	0.0013773	0.0366366
fbxc-51	WBGene00021576	249.266	-1.07197	0.335053	-3.1994	0.00137713	0.0366366
glb-10	WBGene00016215	21.9618	-1.07401	0.335872	-3.19768	0.00138539	0.0367655
cri-2	WBGene00019478	156.045	0.507033	0.158583	3.19728	0.00138728	0.0367655
C33G3.4	WBGene00007904	201.431	-0.680008	0.212943	-3.19338	0.00140617	0.0371973
scav-5	WBGene00011076	158.04	-0.512204	0.160714	-3.18705	0.00143731	0.0378144
acbp-6	WBGene00012457	36.1392	-0.968164	0.303773	-3.18713	0.00143693	0.0378144
grsp-1	WBGene00012840	54.3182	0.898127	0.281854	3.1865	0.00144007	0.0378144
toe-1	WBGene00022739	3364.14	0.275266	0.0863766	3.18681	0.00143851	0.0378144
casy-1	WBGene00000403	803.555	-0.465412	0.146128	-3.18497	0.00144768	0.0379446
pdi-1	WBGene00003962	8102.07	0.20123	0.0632141	3.18331	0.00145601	0.0380931
K07F5.14	WBGene00010638	1367.86	-0.225443	0.0708527	-3.18186	0.00146332	0.0382144
rla-0	WBGene00004408	46881.5	0.173442	0.0545533	3.17931	0.00147627	0.0384288
T19D12.6	WBGene00020581	1145.38	-0.301178	0.0947342	-3.17919	0.00147689	0.0384288
heh-1	WBGene00006452	1130.98	0.388734	0.12232	3.17802	0.00148287	0.0384301
C49A9.6	WBGene00016760	206.023	-0.500315	0.157477	-3.17708	0.00148769	0.0384301
nduf-5	WBGene00021839	1179.8	0.183555	0.0577686	3.17742	0.00148594	0.0384301
M153.4	WBGene00044144	10.9733	-1.82924	0.575621	-3.17785	0.00148371	0.0384301
pgk-1	WBGene00020185	3379.23	0.264196	0.0832132	3.17493	0.00149875	0.038646
clec-146	WBGene00013008	166.046	0.500629	0.157861	3.17133	0.00151743	0.0389873
Y69A2AR.18	WBGene00022089	10366.6	0.112053	0.035331	3.17152	0.00151644	0.0389873
C39F7.1	WBGene00016538	9.72079	-2.25877	0.713065	-3.1677	0.00153652	0.039407
lgc-25	WBGene00010994	41.4047	0.828432	0.261584	3.16698	0.0015403	0.0394333
dsl-2	WBGene00001104	161.139	-0.778779	0.246168	-3.16361	0.00155823	0.0397502
ghi-1	WBGene00013923	52.7448	-0.931881	0.294547	-3.16378	0.00155736	0.0397502
seld-1	WBGene00012867	307.685	0.305122	0.0965008	3.16186	0.00156763	0.0399189
ric-4	WBGene00004364	159.392	-0.503464	0.159367	-3.15914	0.00158235	0.0402001
cnnm-3	WBGene00016343	250.983	-0.504257	0.159636	-3.15878	0.0015843	0.0402001
gpi-1	WBGene00013597	5032.27	0.189205	0.0599198	3.15763	0.00159057	0.0402879
C08H9.15	WBGene00007474	187.323	-0.516906	0.163748	-3.15673	0.00159551	0.0403416
F21G4.1	WBGene00009023	93.4162	-0.544237	0.172651	-3.15223	0.00162029	0.0408323
arrd-2	WBGene00013086	94.3794	-0.69378	0.220096	-3.15217	0.00162062	0.0408323
arx-1	WBGene00000199	1939.62	0.190691	0.0605367	3.15001	0.00163267	0.0410636
fbxb-75	WBGene00019956	44.1604	-1.39301	0.44231	-3.1494	0.00163604	0.041076
Y32F6A.4	WBGene00012529	539.431	-0.442341	0.140477	-3.14884	0.00163918	0.0410829
C44B7.5	WBGene00016627	3991.17	0.332368	0.105613	3.14704	0.00164933	0.041265
inx-5	WBGene00002127	325.47	-0.418672	0.133234	-3.14239	0.00167574	0.0417796
F15D4.4	WBGene00008861	46.5737	1.00668	0.320347	3.14248	0.00167523	0.0417796
F28H7.3	WBGene00009237	1226.38	-0.568822	0.181193	-3.13932	0.00169339	0.0420732
Y111B2A.25	WBGene00014613	278.293	-0.355809	0.113338	-3.13935	0.00169326	0.0420732
mup-2	WBGene00003495	5592.42	0.406007	0.129351	3.13881	0.00169637	0.0420741
pqn-37	WBGene00004124	63.7699	-0.631676	0.20137	-3.13689	0.00170748	0.0422033
ZK470.2	WBGene00022745	762.419	-0.345506	0.110128	-3.13731	0.00170508	0.0422033
eif-3.D	WBGene00001227	5380.08	0.198681	0.0634395	3.13181	0.00173731	0.0427732
T11G6.3	WBGene00011718	99.3668	-0.749507	0.239349	-3.13144	0.0017395	0.0427732
F55G1.6	WBGene00018902	1090.18	-0.204282	0.0652181	-3.13229	0.00173446	0.0427732
sams-2	WBGene00013652	33.7894	-1.11865	0.357669	-3.12762	0.00176226	0.0431917
H05C05.1	WBGene00019157	2807.66	0.425097	0.135919	3.12757	0.00176256	0.0431917
C32D5.8	WBGene00016316	1277.09	0.247317	0.07912	3.12584	0.00177296	0.0433723
gcy-12	WBGene00001538	797.62	-0.437926	0.140222	-3.12308	0.00178967	0.0437064
kri-1	WBGene00013955	23.2602	-0.971227	0.311278	-3.12013	0.00180774	0.0440726
gdi-1	WBGene00001558	6991.44	0.158615	0.0508716	3.11796	0.0018211	0.0443226
Y32H12A.6	WBGene00021314	164.336	0.427057	0.136993	3.11737	0.00182471	0.0443352
R09F10.1	WBGene00019986	339.879	-0.349149	0.112067	-3.11555	0.00183601	0.0445341
F31E9.6	WBGene00009299	64.1822	-1.8097	0.581115	-3.11418	0.00184454	0.0446653
fum-1	WBGene00001503	4990.31	0.258523	0.0830981	3.11105	0.0018642	0.0450651
#N/A	WBGene00306078	356.532	0.390321	0.125483	3.11056	0.00186735	0.0450651
lep-2	WBGene00002278	937.493	0.396255	0.127475	3.1085	0.00188041	0.0450763
R09H10.5	WBGene00011182	2113.37	-0.679093	0.218442	-3.1088	0.00187847	0.0450763
T14B1.1	WBGene00011763	172.164	-0.80606	0.259188	-3.10995	0.00187122	0.0450763
fbxb-104	WBGene00021719	31.2317	-1.26778	0.407773	-3.10902	0.00187706	0.0450763
F16F9.1	WBGene00017513	52.5617	-0.739851	0.238051	-3.10795	0.00188392	0.045085
Y46H3C.5	WBGene00021605	482.998	0.393113	0.126529	3.10691	0.00189057	0.0451685
emb-9	WBGene00001263	12509.7	0.491805	0.158331	3.10619	0.00189513	0.0452021
cox-5A	WBGene00012553	6050.41	0.147856	0.0476327	3.10409	0.00190867	0.0454078
rpb-2	WBGene00016140	4707.63	0.171224	0.0551649	3.10387	0.0019101	0.0454078
pqn-74	WBGene00004156	111.415	0.976381	0.314669	3.10288	0.00191647	0.0454083
ppm-2	WBGene00011953	1976.56	-0.185913	0.0599154	-3.10293	0.00191615	0.0454083
ZK822.5	WBGene00014092	544.87	-0.411675	0.132978	-3.09582	0.00196268	0.0464262
tsp-7	WBGene00006633	17.3678	-1.50391	0.485973	-3.09464	0.00197051	0.046476
pgph-3	WBGene00016892	713.408	0.503481	0.1627	3.09453	0.00197127	0.046476
Y82E9BR.17	WBGene00022349	158.609	-0.978182	0.316226	-3.0933	0.00197945	0.046592
gpc-1	WBGene00001681	8.59579	-2.04104	0.660211	-3.0915	0.00199146	0.0467978
mtk-1	WBGene00003472	3041.05	0.266714	0.086298	3.09061	0.00199745	0.0468614
isp-1	WBGene00002162	4374.32	0.171124	0.0554031	3.08871	0.00201026	0.0470078
dlat-1	WBGene00009082	5767.48	0.179837	0.0582168	3.08909	0.00200769	0.0470078
atg-4.1	WBGene00013595	732.921	0.21325	0.0690625	3.08779	0.00201654	0.0470378
rpi-2	WBGene00019536	29.1237	-1.494	0.483879	-3.08755	0.00201811	0.0470378
cct-2	WBGene00000378	8397.21	0.172733	0.0560151	3.08368	0.00204457	0.0474227
fbxa-149	WBGene00012623	28.6263	-1.29643	0.420308	-3.08447	0.00203914	0.0474227
F25E2.2	WBGene00017780	2317.13	0.36848	0.119488	3.08383	0.00204352	0.0474227
gba-1	WBGene00016335	243.592	-0.536686	0.174164	-3.0815	0.0020596	0.0476941
F08B12.4	WBGene00008572	874.035	0.261894	0.0850452	3.07946	0.00207374	0.047944
gopc-1	WBGene00014101	13.3841	-1.63974	0.532644	-3.07849	0.00208051	0.0479454
K02F3.2	WBGene00019326	1763.39	0.318519	0.103459	3.07868	0.00207917	0.0479454
C50F4.8	WBGene00008233	99.1535	-0.536287	0.17429	-3.07697	0.00209114	0.0480937
T15B7.1	WBGene00020516	1936.79	-0.310692	0.100985	-3.07661	0.00209366	0.0480937
col-19	WBGene00000608	18218.5	0.415652	0.135142	3.07568	0.00210021	0.0481669
ipp-5	WBGene00002146	203.509	-0.397964	0.129444	-3.07442	0.00210915	0.0482628
ule-3	WBGene00008378	13534.8	0.30098	0.0979215	3.07368	0.00211433	0.0482628
nhr-247	WBGene00014193	88.4726	4.01562	1.30646	3.07366	0.00211451	0.0482628
F58E6.11	WBGene00010258	9.633	-2.02534	0.659485	-3.07109	0.00213281	0.0485996
usp-5	WBGene00020839	3796.89	0.27399	0.0892291	3.07063	0.00213606	0.0485996
Y53F4B.25	WBGene00013171	80.1743	2.64214	0.860744	3.0696	0.00214346	0.0486905
Y37E11B.1	WBGene00021374	36.5409	1.54334	0.503026	3.06812	0.00215414	0.0488555
Y57A10A.7	WBGene00013252	195.147	0.307586	0.100307	3.06644	0.00216625	0.0490526
clec-1	WBGene00017772	2358.33	0.306166	0.0998605	3.06594	0.00216987	0.0490568
act-1	WBGene00000063	28153.2	0.461464	0.150691	3.06232	0.00219632	0.0494883
rpl-13	WBGene00004425	28989	0.182838	0.0597186	3.06166	0.0022011	0.0494883
F58B3.4	WBGene00010231	2192.73	-0.18916	0.0617879	-3.06144	0.00220278	0.0494883
F59C6.14	WBGene00044792	24.3606	-0.951609	0.310827	-3.06154	0.002202	0.0494883
mls-2	WBGene00003377	25.8328	-2.06524	0.675089	-3.05921	0.00221919	0.0497008
ZC239.1	WBGene00023399	36.4391	1.17346	0.383566	3.05934	0.00221822	0.0497008
ZK632.11	WBGene00014018	1470.84	-0.241178	0.0788825	-3.05743	0.00223243	0.0499193
C34C12.9	WBGene00007928	98.7105	-0.592646	0.193876	-3.05683	0.00223694	0.049942
cya-1	WBGene00000863	2003.68	-0.182322	0.0596561	-3.05621	0.00224151	0.0499662
T01C3.3	WBGene00011320	2390.06	-0.189816	0.062141	-3.05461	0.00225356	0.0501566
F39G3.3	WBGene00018208	971.315	0.385998	0.126449	3.05259	0.00226875	0.0504162
Y119D3B.13	WBGene00022490	250.448	-0.380702	0.124806	-3.05036	0.00228564	0.0507129
Y37E11AM.3	WBGene00021367	621.527	-0.290035	0.0951605	-3.04785	0.00230485	0.0510599
upb-1	WBGene00017440	1972.81	0.29474	0.0967302	3.04703	0.00231113	0.0511199
mec-5	WBGene00003169	314.418	0.367834	0.120783	3.0454	0.00232368	0.0513181
nlp-16	WBGene00003754	124.512	-0.557728	0.183233	-3.04382	0.00233595	0.0514332
fbxb-117	WBGene00010099	21.9413	1.57033	0.515911	3.0438	0.00233607	0.0514332
F32D1.3	WBGene00017983	39.5083	-1.87969	0.618688	-3.03818	0.00238009	0.0523217
pgam-5	WBGene00019941	2671.14	0.161081	0.053057	3.036	0.00239742	0.0526218
C36A4.10	WBGene00007970	32.175	-1.3511	0.445181	-3.03493	0.00240589	0.0527269
ptr-23	WBGene00004237	303.437	-0.371765	0.122695	-3.02999	0.00244565	0.0534346
rrp-1	WBGene00008151	853.554	-0.184343	0.0608348	-3.03022	0.00244376	0.0534346
sur-5	WBGene00006351	2370.28	-0.29276	0.0966461	-3.0292	0.00245203	0.0534923
cpg-8	WBGene00019357	1293.25	-0.28643	0.0945949	-3.02797	0.00246205	0.0536293
mec-9	WBGene00003173	27.6404	-0.874235	0.28877	-3.02744	0.00246633	0.0536408
tag-234	WBGene00018874	64.0454	-1.02367	0.338225	-3.0266	0.00247317	0.053708
W02A11.6	WBGene00014852	22.8644	1.04158	0.344257	3.02557	0.00248165	0.0538103
F20G2.2	WBGene00008986	312.099	-0.322234	0.106585	-3.02325	0.00250076	0.0539794
F55C9.11	WBGene00010107	21.4706	-1.67996	0.555651	-3.0234	0.00249948	0.0539794
Y39E4B.6	WBGene00012717	358.742	0.498967	0.164997	3.0241	0.00249376	0.0539794
unc-39	WBGene00006775	30.4534	-2.34611	0.777349	-3.01809	0.0025437	0.0548237
nhr-120	WBGene00003710	38.3521	-0.842253	0.27917	-3.01699	0.002553	0.0549257
D2096.10	WBGene00017077	62.4768	-1.07004	0.354716	-3.01662	0.00255611	0.0549257
madd-4	WBGene00009958	98.5339	-0.584941	0.193943	-3.01605	0.00256092	0.0549464
gss-1	WBGene00010941	1375.32	-0.178333	0.0591638	-3.01422	0.00257642	0.0551138
ccpp-1	WBGene00018995	1974.18	0.217487	0.0721515	3.0143	0.00257569	0.0551138
F44E5.1	WBGene00009688	2449.29	0.196391	0.0652715	3.00883	0.00262256	0.0559882
ugt-63	WBGene00015449	214.836	-0.850363	0.282654	-3.00849	0.0026255	0.0559882
R11G1.6	WBGene00020012	341.334	0.326409	0.108511	3.00808	0.00262903	0.0559882
tsp-15	WBGene00006641	64.1901	-0.605131	0.201226	-3.00723	0.00263643	0.0560623
ari-2	WBGene00020462	1380.08	-0.20638	0.0686459	-3.00645	0.00264317	0.0561223
Y116A8C.13	WBGene00013792	911.355	0.33334	0.110898	3.00582	0.00264866	0.0561556
jmjd-3.3	WBGene00007813	79.8411	1.0512	0.35005	3.00299	0.00267337	0.0565956
pmt-1	WBGene00022781	4355.67	0.263218	0.0877048	3.00118	0.00268934	0.0568496
sri-40	WBGene00005552	638.094	-0.197701	0.0658918	-3.00038	0.0026964	0.0569147
knl-3	WBGene00020392	1342.44	-0.221274	0.0737658	-2.99968	0.00270267	0.0569631
T21F4.1	WBGene00020658	916.999	0.315411	0.105214	2.99781	0.00271927	0.0572287
mlc-4	WBGene00003372	3075.24	0.174847	0.0583462	2.99671	0.00272906	0.0573504
eef-2	WBGene00001167	103377	0.163307	0.0545583	2.99326	0.00276012	0.0579179
lin-18	WBGene00003007	133.618	-0.439337	0.147056	-2.98755	0.0028122	0.0588383
C23H4.3	WBGene00007692	150.931	-0.481192	0.161053	-2.98779	0.00281005	0.0588383
iars-1	WBGene00002152	6479.22	0.178175	0.0596673	2.98614	0.00282527	0.0590097
T04D3.1	WBGene00011431	509.765	0.269497	0.0902606	2.98577	0.00282864	0.0590097
erd-2.1	WBGene00001331	797.716	-0.324511	0.108764	-2.98363	0.00284847	0.0593369
F14B6.3	WBGene00008784	99.5123	-0.881373	0.295634	-2.98129	0.00287033	0.0597053
fbxb-18	WBGene00019039	20.3122	-2.10064	0.7049	-2.98005	0.00288201	0.0598613
B0252.3	WBGene00015088	237.351	-0.484152	0.162492	-2.97955	0.00288673	0.0598724
rps-4	WBGene00004473	35244.2	0.175852	0.0590518	2.97793	0.00290201	0.0601023
Y45F10B.13	WBGene00012875	760.157	0.441699	0.148401	2.97639	0.0029166	0.0603172
pbs-6	WBGene00003952	3029.92	0.223676	0.0751972	2.97453	0.00293437	0.0604064
sox-2	WBGene00004949	199.224	-0.629942	0.211757	-2.97484	0.00293146	0.0604064
F13B12.2	WBGene00008730	63.4497	-0.64214	0.215906	-2.97417	0.0029378	0.0604064
F46H5.3	WBGene00018519	23771.2	0.328871	0.110554	2.97475	0.00293224	0.0604064
rgs-2	WBGene00004345	62.2788	-0.657695	0.221202	-2.97328	0.00294639	0.060496
col-103	WBGene00000677	5425.47	0.494593	0.166474	2.97099	0.00296843	0.0607678
plp-1	WBGene00004046	6555.83	0.123949	0.0417375	2.96974	0.00298053	0.0607678
F15D4.6	WBGene00008863	108.126	-1.95858	0.659388	-2.9703	0.00297505	0.0607678
F59D12.1	WBGene00010329	21.9728	-1.36496	0.459695	-2.96927	0.0029851	0.0607678
ZK930.5	WBGene00014155	8.60193	1.51157	0.509019	2.96957	0.00298216	0.0607678
cra-1	WBGene00020068	3226.63	0.1919	0.0645923	2.97095	0.0029688	0.0607678
C01G5.25	WBGene00235291	9.38412	-1.76393	0.594572	-2.96672	0.0030099	0.0611857
acox-1.1	WBGene00008564	751.663	-0.288208	0.0971746	-2.96588	0.00301818	0.0612668
cca-1	WBGene00000367	168.352	-0.558544	0.18836	-2.9653	0.00302391	0.0612964
mev-1	WBGene00003225	1748.27	0.181434	0.0612047	2.96438	0.00303293	0.0613817
spl-2	WBGene00006418	39.022	-0.749931	0.253013	-2.964	0.0030367	0.0613817
rpt-5	WBGene00004505	5544.12	0.173722	0.0586933	2.95983	0.00307809	0.0619172
oac-14	WBGene00008602	474.541	0.937445	0.31674	2.95967	0.00307972	0.0619172
glo-3	WBGene00010341	61.7491	-0.612847	0.207102	-2.95916	0.00308483	0.0619172
VF13D12L.3	WBGene00012149	2692.51	0.247998	0.0837641	2.96067	0.00306974	0.0619172
C06A6.4	WBGene00015509	2203.64	0.187243	0.0632708	2.95939	0.00308251	0.0619172
pat-2	WBGene00003929	1486.05	0.36439	0.123283	2.95572	0.00311942	0.0625239
Y102A5C.4	WBGene00013613	10.6665	1.52893	0.517838	2.95252	0.00315188	0.0630861
his-55	WBGene00001929	30.2871	6.71978	2.27721	2.95088	0.00316875	0.0633351
rpl-24.1	WBGene00004436	22844.1	0.177466	0.0601956	2.94816	0.00319671	0.0637269
cutl-3	WBGene00008978	16.2535	-1.29627	0.439697	-2.94811	0.00319726	0.0637269
cal-4	WBGene00000288	37.3512	-0.899915	0.305579	-2.94495	0.00323011	0.0640164
clp-1	WBGene00000542	4190.57	0.288692	0.0980215	2.9452	0.00322751	0.0640164
F19C6.3	WBGene00008952	27.171	-0.842333	0.286014	-2.94508	0.00322875	0.0640164
enpl-1	WBGene00011480	12041.1	0.157132	0.0533635	2.94456	0.00323415	0.0640164
nap-1	WBGene00017075	13649.8	-0.153254	0.0520428	-2.94476	0.00323204	0.0640164
F17C11.2	WBGene00008914	53.5388	-0.747933	0.254095	-2.94352	0.00324506	0.0640552
W03G11.4	WBGene00012226	339.661	-0.659433	0.224027	-2.94355	0.00324475	0.0640552
ost-1	WBGene00003893	5683.72	0.300041	0.10199	2.94188	0.00326228	0.0642762
clec-266	WBGene00016088	506.062	-0.855707	0.290899	-2.9416	0.00326524	0.0642762
dsb-3	WBGene00016701	394.733	-0.26592	0.0904172	-2.94103	0.00327125	0.0643061
gsnl-1	WBGene00010593	650.563	0.453503	0.154357	2.93802	0.00330314	0.064844
K01A2.5	WBGene00019280	239.738	0.653411	0.222448	2.93737	0.00331012	0.064892
tbc-16	WBGene00018639	29.9791	-0.929287	0.316484	-2.93628	0.00332171	0.06503
B0252.1	WBGene00015087	45.1341	-0.811617	0.276692	-2.93328	0.00335399	0.0655723
dim-1	WBGene00001000	5224.36	0.330091	0.112637	2.93057	0.00338342	0.0660422
R08E3.1	WBGene00019957	2240.95	-0.534593	0.182441	-2.93022	0.00338725	0.0660422
ZC262.4	WBGene00022581	9.82272	2.07533	0.70848	2.92928	0.00339751	0.0661521
daf-11	WBGene00000907	10.5683	-2.51238	0.85804	-2.92804	0.00341105	0.0663254
nuo-2	WBGene00020417	2158.22	0.203528	0.0695502	2.92634	0.00342972	0.066598
C01B10.11	WBGene00044294	479.999	-0.301073	0.102947	-2.92455	0.00344952	0.0668917
emc-1	WBGene00019209	4883.26	0.215553	0.0737256	2.92372	0.00345881	0.0669541
fbxb-41	WBGene00019703	45.0056	-0.997379	0.341169	-2.92342	0.00346209	0.0669541
myo-3	WBGene00003515	3746.36	0.506486	0.173542	2.91851	0.00351706	0.0679253
ain-2	WBGene00015007	3623.77	-0.206416	0.0707452	-2.91774	0.00352573	0.0680009
C53D6.7	WBGene00008284	180.225	0.591769	0.202895	2.91662	0.00353842	0.068154
amt-4	WBGene00000136	446.531	-0.318721	0.109309	-2.91578	0.00354803	0.0681699
nas-27	WBGene00003545	17.0654	-2.2526	0.772574	-2.91571	0.00354878	0.0681699
lea-1	WBGene00002263	5148.79	0.385004	0.132098	2.91454	0.00356219	0.0682442
sepa-1	WBGene00010808	334.206	-0.774218	0.265639	-2.91455	0.00356205	0.0682442
Y92H12A.5	WBGene00022361	2048.37	0.361956	0.124222	2.91378	0.00357081	0.068318
pqn-22	WBGene00004112	4446.62	0.373702	0.128426	2.90986	0.00361593	0.0684492
unc-45	WBGene00006781	1854.48	0.225603	0.0775217	2.91019	0.00361203	0.0684492
aptf-4	WBGene00009202	130.425	-0.792197	0.27199	-2.9126	0.00358434	0.0684492
ptp-4	WBGene00010558	64.7713	-0.820513	0.28176	-2.9121	0.00359009	0.0684492
tric-1B.2	WBGene00013268	690.866	-0.223486	0.0767834	-2.9106	0.00360732	0.0684492
nrps-1	WBGene00013440	72.2746	0.964666	0.331469	2.91027	0.00361112	0.0684492
K03B4.4	WBGene00019355	16.9817	-1.26256	0.433691	-2.91119	0.00360052	0.0684492
W01C8.5	WBGene00020921	489.725	-0.487146	0.167411	-2.90988	0.00361568	0.0684492
C27D9.1	WBGene00016163	1975.94	-0.2468	0.0848819	-2.90756	0.00364256	0.0688623
pde-2	WBGene00011146	3478.4	-0.19794	0.068123	-2.90563	0.00366514	0.0691066
Y43C5A.2	WBGene00012782	1362.26	-0.251631	0.0865978	-2.90574	0.00366385	0.0691066
F57A8.1	WBGene00010177	293.715	-0.55739	0.191887	-2.90478	0.00367516	0.0691134
ZK131.11	WBGene00013934	241.522	0.336298	0.11576	2.90514	0.0036709	0.0691134
elp-1	WBGene00001248	143.637	-0.464395	0.15992	-2.90393	0.0036851	0.0692092
exo-3	WBGene00001372	1782.89	-0.189271	0.0652004	-2.90291	0.00369711	0.069315
let-60	WBGene00002335	1723.69	-0.166511	0.0573817	-2.90181	0.00371008	0.069315
F59C6.5	WBGene00010326	3055.75	0.170537	0.0587693	2.90181	0.0037101	0.069315
M02B7.7	WBGene00044690	52.3942	-1.18366	0.40788	-2.90199	0.00370804	0.069315
unc-26	WBGene00006763	1125.28	0.451809	0.155728	2.90127	0.00371659	0.0693457
F47B7.2	WBGene00018533	1034.62	0.231217	0.0797093	2.90075	0.00372265	0.0693683
col-140	WBGene00000713	42815.9	0.417375	0.143953	2.89938	0.00373903	0.0695828
rde-2	WBGene00004324	1512.27	-0.189551	0.0653859	-2.89896	0.00374406	0.0695861
cht-1	WBGene00000503	897.345	-0.746094	0.257605	-2.89628	0.00377621	0.0699455
ifa-1	WBGene00002050	696.917	0.34818	0.120223	2.89612	0.00377806	0.0699455
glb-20	WBGene00010970	32.7122	-0.660018	0.227873	-2.89642	0.00377445	0.0699455
aco-2	WBGene00000041	17017.2	0.208568	0.072033	2.89545	0.00378616	0.0699666
let-383	WBGene00044898	88.5777	-0.809818	0.279709	-2.89522	0.00378898	0.0699666
C26C6.9	WBGene00007743	142.746	-0.477839	0.16531	-2.89056	0.00384555	0.0709197
hmg-11	WBGene00001976	271.04	-0.70228	0.243088	-2.88899	0.0038648	0.071183
cand-1	WBGene00013606	5629.54	0.281461	0.0974445	2.88842	0.00387185	0.0712212
ocrl-1	WBGene00007620	2005.49	-0.211237	0.0731489	-2.88777	0.00387987	0.071277
tars-1	WBGene00006617	8672.01	0.260759	0.0903606	2.88576	0.00390464	0.0716401
set-27	WBGene00022173	619.264	0.304854	0.105715	2.88374	0.00392983	0.07201
lec-5	WBGene00002268	2402.54	0.284862	0.0988636	2.88137	0.00395955	0.0724618
Y48E1B.2	WBGene00013001	974.725	0.220113	0.0764317	2.87986	0.00397854	0.0727164
col-142	WBGene00000715	1948.01	0.624129	0.2168	2.87882	0.00399161	0.0728621
grd-1	WBGene00001690	42.8873	-0.80587	0.280133	-2.87674	0.00401807	0.0732517
ego-1	WBGene00001214	4102.54	0.270799	0.0941945	2.87489	0.00404169	0.0734952
ham-1	WBGene00001820	142.261	-0.998468	0.347278	-2.87513	0.00403862	0.0734952
nlp-10	WBGene00003748	95.7865	-0.548345	0.190806	-2.87383	0.00405527	0.0735986
rpoa-12	WBGene00007616	283.256	-0.309319	0.107641	-2.87362	0.00405799	0.0735986
vha-15	WBGene00020507	2870.58	0.169702	0.0590628	2.87324	0.00406281	0.0735986
hal-2	WBGene00011819	627.526	-0.217985	0.0759422	-2.87041	0.00409945	0.0738881
F49E8.6	WBGene00018637	154.933	0.37042	0.129023	2.87096	0.00409222	0.0738881
F54E7.9	WBGene00018831	296.642	-0.31516	0.109755	-2.87147	0.00408562	0.0738881
tmem-135	WBGene00019345	135.983	-0.538295	0.187509	-2.87077	0.00409472	0.0738881
prx-12	WBGene00004197	77.0336	-0.570044	0.198652	-2.86956	0.0041104	0.0739923
clik-1	WBGene00020808	13407.6	0.319704	0.111502	2.86724	0.00414066	0.0744434
idha-1	WBGene00009664	4111.57	0.204235	0.0712543	2.86628	0.00415328	0.0745766
rps-11	WBGene00004480	21495.6	0.144823	0.0505612	2.86432	0.00417907	0.0747484
acs-14	WBGene00008669	841.821	-0.305768	0.106764	-2.86397	0.00418374	0.0747484
ZC373.2	WBGene00013867	3356.18	0.296571	0.103548	2.8641	0.004182	0.0747484
trk-1	WBGene00017039	17.2782	-1.20642	0.421222	-2.86411	0.00418189	0.0747484
polg-1	WBGene00013258	767.241	0.293272	0.102419	2.86344	0.00419062	0.0747781
memi-1	WBGene00003216	1464.78	-0.210296	0.0734913	-2.86151	0.00421627	0.0749553
fbxc-21	WBGene00019042	18.5229	-1.4693	0.513466	-2.86154	0.00421594	0.0749553
H41C03.3	WBGene00019270	139.794	-0.416936	0.145695	-2.8617	0.00421369	0.0749553
ddl-2	WBGene00013000	553.963	0.499829	0.174771	2.85992	0.00423751	0.0751613
EEED8.12	WBGene00017140	90.6322	-0.724755	0.253424	-2.85985	0.00423836	0.0751613
R07H5.8	WBGene00011128	5692.35	0.221588	0.0775588	2.85703	0.00427622	0.0755546
F56F10.1	WBGene00018984	1089.55	-0.360365	0.126106	-2.85765	0.00426793	0.0755546
atg-5	WBGene00022152	723.434	0.195446	0.0684157	2.85674	0.00428021	0.0755546
Y92H12BL.1	WBGene00022363	1349	0.340451	0.119179	2.85663	0.00428166	0.0755546
rig-5	WBGene00004372	20.6441	-1.4672	0.514036	-2.85427	0.00431362	0.0757609
unc-6	WBGene00006746	119.678	-0.728764	0.255256	-2.85503	0.00430321	0.0757609
Y11D7A.3	WBGene00012428	674.254	-0.388911	0.136251	-2.85438	0.00431203	0.0757609
R02F2.7	WBGene00019836	1196.46	0.303587	0.106365	2.8542	0.00431452	0.0757609
spon-1	WBGene00006893	631.122	0.275805	0.0966892	2.85249	0.00433783	0.0760768
rpt-6	WBGene00004506	3206.72	0.15728	0.0551521	2.85175	0.00434793	0.0761606
pgp-2	WBGene00003996	774.741	-0.387838	0.136131	-2.84902	0.00438547	0.0766995
acaa-2	WBGene00009952	4357.42	0.156682	0.0550008	2.84873	0.00438941	0.0766995
C32E12.4	WBGene00016330	361.194	0.363094	0.127482	2.84821	0.00439666	0.0767324
gna-1	WBGene00001646	37.6848	0.732505	0.257287	2.84704	0.00441282	0.0769207
nhr-97	WBGene00003687	1264.37	-0.223754	0.0786268	-2.84578	0.00443034	0.0771321
ZC317.1	WBGene00022587	25.8421	1.47455	0.518231	2.84535	0.00443629	0.0771419
nuo-1	WBGene00003831	6335.87	0.155335	0.0546124	2.84432	0.00445069	0.0772984
dod-19	WBGene00022644	1915.78	-0.565187	0.198838	-2.84245	0.0044768	0.0776575
fbxa-5	WBGene00022325	8.19161	-1.46922	0.517102	-2.84126	0.00449351	0.077853
frpr-5	WBGene00008342	25.9696	-1.71545	0.60464	-2.83714	0.00455198	0.0786756
mdt-26	WBGene00016115	2910.93	0.39583	0.13951	2.83729	0.00454987	0.0786756
cor-1	WBGene00000768	316.044	0.343004	0.120921	2.8366	0.00455967	0.0787134
pdi-3	WBGene00003964	14397.9	0.11009	0.0388332	2.83494	0.00458344	0.0790285
clp-4	WBGene00000545	741.769	0.410262	0.144767	2.83395	0.00459763	0.0790566
vet-6	WBGene00006902	292.618	-0.80034	0.282439	-2.83367	0.00460164	0.0790566
T25C12.3	WBGene00012018	9043.93	-0.52346	0.184703	-2.83406	0.00459612	0.0790566
rsp-3	WBGene00004700	5913.16	-0.124598	0.0440013	-2.83169	0.00463031	0.0793585
T06A1.5	WBGene00020280	152.673	-0.47416	0.167438	-2.83186	0.00462779	0.0793585
nft-1	WBGene00003594	775.731	0.185995	0.0657341	2.82951	0.00466192	0.0796143
pat-6	WBGene00003932	636.28	0.221971	0.0784484	2.82952	0.00466185	0.0796143
Y39A1C.1	WBGene00012662	40.9462	-0.788039	0.278453	-2.83006	0.00465396	0.0796143
Y57G11C.51	WBGene00044258	223.208	-0.908089	0.321019	-2.82877	0.0046727	0.0797032
Y43F4B.5	WBGene00012803	2720.86	0.181075	0.0640257	2.82815	0.00468172	0.0797204
C49A9.9	WBGene00016763	367.937	-0.346674	0.122589	-2.82794	0.00468485	0.0797204
rpl-6	WBGene00004417	29281.1	0.16483	0.0583506	2.82481	0.00473081	0.0804069
T19D2.2	WBGene00004184	261.137	-0.33034	0.117046	-2.82232	0.00476775	0.0808427
sdz-28	WBGene00020073	115.313	-0.808794	0.286535	-2.82267	0.00476253	0.0808427
C35A5.3	WBGene00007947	758.127	-0.412131	0.146107	-2.82075	0.00479115	0.0811011
nduo-3	WBGene00010966	518.587	0.629149	0.22306	2.82054	0.00479432	0.0811011
K10C2.12	WBGene00206386	27.7887	-0.734608	0.260604	-2.81886	0.00481941	0.0814293
ZK563.7	WBGene00044355	66.6254	0.551829	0.195889	2.81705	0.00484664	0.0817928
cct-3	WBGene00018782	6607.21	0.234615	0.0833514	2.81477	0.00488114	0.082278
fbxc-18	WBGene00016307	40.6433	-1.28327	0.45621	-2.81289	0.00490987	0.082665
tag-273	WBGene00013289	850.385	0.363445	0.129237	2.81225	0.00491965	0.0827323
kpc-1	WBGene00002232	396.525	-0.43248	0.154075	-2.80694	0.00500152	0.0840102
snpc-3.3	WBGene00021662	50.8315	-0.752807	0.268353	-2.80528	0.00502726	0.0843436
F39H12.2	WBGene00018213	11.9896	-2.42088	0.863304	-2.80421	0.00504408	0.0845267
got-1.2	WBGene00020146	1011.43	0.278458	0.0993286	2.80341	0.00505658	0.0846371
fkh-7	WBGene00001439	410.599	0.391365	0.139687	2.80172	0.00508313	0.084982
F18A11.6	WBGene00008933	35.5913	-0.718784	0.256612	-2.80105	0.00509359	0.0850576
nlp-8	WBGene00003746	79.5961	-0.598628	0.213751	-2.80059	0.00510091	0.0850671
H43E16.1	WBGene00019273	200.197	-0.698306	0.249371	-2.80027	0.00510605	0.0850671
C14E2.12	WBGene00219816	62.443	-0.758914	0.271124	-2.79914	0.00512395	0.0852661
nrf-5	WBGene00003812	1105.86	0.306125	0.109495	2.7958	0.00517717	0.0858522
T12A7.2	WBGene00011723	83.3034	-0.500617	0.179045	-2.79605	0.00517318	0.0858522
C08F1.6	WBGene00015610	72.4107	-0.979005	0.350134	-2.79608	0.00517259	0.0858522
idh-2	WBGene00007942	727.373	0.197945	0.0708788	2.79272	0.00522662	0.086572
icl-1	WBGene00001564	8653.29	0.509342	0.182505	2.79084	0.00525717	0.0869772
F28B4.3	WBGene00017892	4763.18	-0.69231	0.248268	-2.78856	0.00529435	0.0874913
jnk-1	WBGene00002178	46.0369	-0.796699	0.285788	-2.78773	0.00530786	0.0876134
efl-2	WBGene00001162	651.925	0.254749	0.0914151	2.78673	0.00532435	0.0877842
end-3	WBGene00001311	12.7521	1.28431	0.461143	2.78505	0.00535191	0.0879348
F31F6.1	WBGene00009300	209.663	0.381604	0.136985	2.78573	0.00534066	0.0879348
pfk-1.1	WBGene00022199	2076.01	0.35604	0.127829	2.78528	0.00534822	0.0879348
nhr-226	WBGene00020850	29.3353	-0.786268	0.28245	-2.78374	0.00537362	0.0881903
eat-4	WBGene00001135	25.8198	-0.913898	0.328583	-2.78133	0.00541369	0.0887461
trpp-10	WBGene00022138	1033.01	0.376484	0.135419	2.78015	0.00543344	0.088968
gcsh-1	WBGene00008354	219.555	-0.615205	0.221521	-2.77719	0.00548315	0.0895871
K05F6.12	WBGene00045486	11.3928	-1.41028	0.507814	-2.77715	0.00548377	0.0895871
H20J04.4	WBGene00019219	774.51	0.296436	0.106756	2.77675	0.00549051	0.0895949
kin-10	WBGene00002196	3807.01	0.119205	0.042939	2.77614	0.00550086	0.0896615
rpn-7	WBGene00004463	6429.26	0.140204	0.0505459	2.7738	0.00554059	0.0901038
best-20	WBGene00021368	155.511	0.362157	0.130549	2.77411	0.00553522	0.0901038
pes-2.2	WBGene00010158	329.225	-0.760408	0.274356	-2.77161	0.00557794	0.0905213
C23G10.7	WBGene00016014	2367.42	-0.209029	0.0754194	-2.77156	0.00557891	0.0905213
F09E5.16	WBGene00017292	37.5363	-0.769476	0.277708	-2.77081	0.00559168	0.0905231
T13C2.3	WBGene00020479	59.7077	-0.805331	0.290631	-2.77097	0.00558893	0.0905231
hum-2	WBGene00002036	4183.6	-0.151783	0.0548263	-2.76844	0.00563249	0.0908756
T27E9.6	WBGene00012096	25.3336	-1.1681	0.421881	-2.76879	0.00562646	0.0908756
H20E11.1	WBGene00019213	203.704	-0.656566	0.237126	-2.76885	0.00562552	0.0908756
fbxb-37	WBGene00020537	39.7737	-1.19219	0.430727	-2.76786	0.00564263	0.0909365
ugt-62	WBGene00010904	2327.83	-0.888605	0.321091	-2.76746	0.00564953	0.0909454
rpl-25.1	WBGene00004438	2801.06	0.262272	0.0948316	2.76566	0.00568072	0.091313
uggt-1	WBGene00018604	2203.06	0.196963	0.0712236	2.76541	0.00568513	0.091313
F10C1.8	WBGene00017327	30.598	-0.888172	0.321235	-2.76486	0.00569469	0.0913478
F59G1.4	WBGene00019128	24.1509	-1.77885	0.643536	-2.76419	0.00570645	0.0913478
best-24	WBGene00022797	333.058	-0.302963	0.109602	-2.76422	0.00570599	0.0913478
pho-9	WBGene00022181	148.029	-0.671883	0.243221	-2.76244	0.00573713	0.0917364
bath-36	WBGene00013569	192.086	-0.423697	0.153424	-2.76161	0.00575179	0.0918682
ilys-5	WBGene00017691	6512.22	-0.318591	0.115471	-2.75906	0.00579685	0.0924846
dpf-6	WBGene00001059	67.3612	-0.665779	0.241347	-2.75859	0.00580512	0.0925135
fkh-2	WBGene00001434	22.1721	-1.71912	0.623551	-2.75699	0.00583356	0.0927601
linc-76	WBGene00219619	9.95474	1.60489	0.582057	2.75728	0.00582848	0.0927601
K08E7.6	WBGene00010674	17.1413	-1.46255	0.530666	-2.75607	0.00585005	0.092919
srv-1	WBGene00005712	166.324	-0.327674	0.119	-2.75356	0.00589511	0.0934274
T16G12.1	WBGene00011803	793.86	-0.589693	0.214144	-2.75372	0.00589214	0.0934274
pbs-5	WBGene00003951	3412.31	0.160625	0.0583772	2.7515	0.00593223	0.0938896
sly-1	WBGene00009654	1316.26	0.197474	0.0717781	2.75117	0.00593827	0.0938896
ttll-15	WBGene00010630	44.6865	-0.671411	0.244073	-2.75086	0.00594395	0.0938896
F15G9.1	WBGene00008865	568.773	0.252461	0.0918047	2.74998	0.00595989	0.0940375
fbxb-101	WBGene00013404	19.9396	-2.78524	1.01302	-2.74944	0.00596964	0.0940875
lec-7	WBGene00002270	33.1881	0.952503	0.346954	2.74533	0.00604499	0.0950657
rab-3	WBGene00004267	93.2512	-0.494368	0.180056	-2.74563	0.00603943	0.0950657
cit-1.2	WBGene00000508	1000.25	-0.248492	0.0905435	-2.74445	0.00606131	0.0952178
pgp-13	WBGene00004007	42.6032	-0.62333	0.227223	-2.74326	0.0060833	0.0954584
fbxa-124	WBGene00014916	98.8404	0.507363	0.185069	2.74148	0.00611635	0.095872
lips-15	WBGene00012585	564.232	0.494986	0.180658	2.7399	0.00614578	0.0962278
ceh-19	WBGene00000442	18.0904	1.34645	0.491565	2.73912	0.00616048	0.0962474
mccc-1	WBGene00009319	3503.47	0.152705	0.0557473	2.73924	0.00615811	0.0962474
T28C6.10	WBGene00045183	15.2329	1.20974	0.441737	2.73859	0.00617025	0.0962949
ZK899.6	WBGene00014144	41.7177	-1.04072	0.38016	-2.73759	0.00618915	0.0964847
gadr-5	WBGene00045058	71.0003	-0.834923	0.305354	-2.73428	0.00625165	0.0973529
tiar-2	WBGene00012904	964.553	0.213599	0.0781514	2.73314	0.00627334	0.0975157
Y53F4B.10	WBGene00013157	13.1272	1.3072	0.478363	2.73265	0.00628263	0.0975157
F40G9.9	WBGene00018245	12.7034	-1.48568	0.543693	-2.73257	0.00628415	0.0975157
gcn-1	WBGene00021697	4713.96	0.585866	0.214422	2.7323	0.00628935	0.0975157
ugt-11	WBGene00020593	71.9625	-0.550735	0.201672	-2.73084	0.00631727	0.0977241
Y34B4A.4	WBGene00021320	104.846	-0.447539	0.163867	-2.73111	0.00631206	0.0977241
C36A4.14	WBGene00194650	71.629	0.837719	0.306797	2.73053	0.00632328	0.0977241
lido-10	WBGene00016575	108.302	0.567983	0.208096	2.72943	0.00634446	0.097933
txdc-12.2	WBGene00018656	396.634	0.395874	0.145056	2.72911	0.00635049	0.097933
C40H1.7	WBGene00008042	78.0453	-0.812888	0.297976	-2.72804	0.00637128	0.0981479
sphk-1	WBGene00007918	514.257	-0.263815	0.0967341	-2.72722	0.0063871	0.0982857
ztf-26	WBGene00010137	72.0339	-0.55913	0.205144	-2.72555	0.00641938	0.0984649
hsp-75	WBGene00020110	2837.27	0.150836	0.0553289	2.72616	0.00640752	0.0984649
mel-46	WBGene00020284	1832.79	0.312976	0.114816	2.7259	0.00641262	0.0984649
metl-2	WBGene00044720	206.326	0.313607	0.115117	2.72424	0.00644497	0.0987516
glr-1	WBGene00001612	17.0426	-1.32269	0.485603	-2.7238	0.00645353	0.098777
K08D8.5	WBGene00010659	194.118	-0.559515	0.205554	-2.72199	0.00648904	0.0992144
R07E4.1	WBGene00019935	155.697	-0.399583	0.14683	-2.72141	0.00650046	0.0992829
puf-12	WBGene00014165	4272.3	-0.171801	0.0631435	-2.72081	0.00651224	0.0993568
tbg-1	WBGene00006540	2085.28	0.132181	0.0486126	2.71907	0.00654659	0.0995625
Y57G11B.5	WBGene00013297	3750.32	0.379937	0.139722	2.71924	0.00654328	0.0995625
clec-173	WBGene00044469	237.456	-0.500989	0.184246	-2.71912	0.00654551	0.0995625
mtm-1	WBGene00003475	812.548	-0.192892	0.0709928	-2.71707	0.00658631	0.10006
frpr-19	WBGene00021510	135.099	0.447512	0.16492	2.71351	0.00665736	0.101032
spr-2	WBGene00005007	2739.95	0.120998	0.0446088	2.71242	0.00667932	0.101151
ugt-56	WBGene00011453	10.5979	-2.10499	0.775994	-2.71263	0.00667511	0.101151
set-32	WBGene00008062	524.588	0.322638	0.118975	2.71181	0.00669171	0.101232
acs-11	WBGene00018269	1217.01	0.316746	0.116935	2.70873	0.00675406	0.102067
dhs-17	WBGene00000980	328.864	-0.334637	0.123656	-2.70618	0.00680614	0.102235
mrps-5	WBGene00008452	1877.85	0.163144	0.0602662	2.70706	0.00678825	0.102235
ekl-1	WBGene00009052	1918.74	0.197096	0.0728435	2.70574	0.00681521	0.102235
F55H2.7	WBGene00010132	1249.57	-0.263586	0.0973717	-2.70701	0.00678918	0.102235
mmcm-1	WBGene00014202	3633.87	0.150915	0.0557608	2.70647	0.0068002	0.102235
mpc-2	WBGene00018765	1362.06	0.190935	0.070561	2.70595	0.00681088	0.102235
cil-1	WBGene00086546	1080.26	-0.185802	0.0686323	-2.70721	0.00678521	0.102235
rpl-24.2	WBGene00004437	1046.71	-0.269435	0.0996177	-2.70469	0.00683676	0.102451
Y56A3A.33	WBGene00013244	77.3298	0.51827	0.1917	2.70355	0.0068603	0.102696
ncx-2	WBGene00003567	638.954	0.506997	0.187581	2.70282	0.00687545	0.102803
Y48G10A.3	WBGene00013020	1265.8	0.180346	0.0667328	2.70251	0.00688176	0.102803
drl-1	WBGene00017578	169.505	-0.322701	0.119446	-2.70164	0.00689989	0.102966
alh-1	WBGene00000107	5091.69	0.178411	0.0660999	2.69911	0.00695262	0.103645
mfn-1	WBGene00012204	911.578	0.177	0.0655954	2.69835	0.00696833	0.103771
tba-2	WBGene00006529	24788.2	0.178059	0.0660072	2.69758	0.00698465	0.103798
cct-8	WBGene00021934	6807.33	0.263063	0.0975112	2.69777	0.00698055	0.103798
act-4	WBGene00000066	32746.8	0.4406	0.163427	2.696	0.00701768	0.104064
flr-2	WBGene00001466	19.9114	-1.08815	0.403667	-2.69567	0.0070247	0.104064
cpna-1	WBGene00006495	1149.6	0.520288	0.193057	2.695	0.00703893	0.104064
T12D8.9	WBGene00011736	1356.5	0.465328	0.17261	2.69583	0.00702132	0.104064
ucr-1	WBGene00018963	6900.8	0.22186	0.0823124	2.69534	0.0070317	0.104064
H43I07.1	WBGene00019274	968.977	0.191172	0.0710469	2.69079	0.00712836	0.105278
C15A11.7	WBGene00007599	142.167	-0.497562	0.185038	-2.68898	0.00716712	0.105666
fbxc-39	WBGene00018456	29.4146	-1.5829	0.588686	-2.68887	0.00716943	0.105666
tnt-4	WBGene00006589	222.512	0.49129	0.182774	2.68797	0.00718888	0.105844
act-2	WBGene00000064	28517.8	0.206632	0.0769285	2.68603	0.00723062	0.106349
abce-1	WBGene00012714	4243.15	0.153737	0.0572447	2.68562	0.0072396	0.106372
acdh-11	WBGene00012860	1221.5	0.220343	0.0820858	2.68431	0.00726807	0.10668
eif-2D	WBGene00016113	1318.9	-0.164852	0.0614329	-2.68346	0.00728654	0.106732
ZK1193.2	WBGene00022858	784.505	-0.232866	0.086768	-2.68378	0.0072795	0.106732
vars-1	WBGene00006935	1403.27	0.193786	0.0722319	2.68283	0.00730012	0.106822
ZK809.8	WBGene00014088	1141.76	0.379111	0.141404	2.68104	0.00733934	0.107286
toc-1	WBGene00006590	1555.26	-0.170692	0.0637081	-2.67928	0.00737816	0.107744
col-160	WBGene00000733	19128.3	0.38227	0.142742	2.67805	0.00740521	0.108029
CE7X_3.4	WBGene00235377	99.0385	0.619107	0.231245	2.67727	0.00742246	0.10817
tba-5	WBGene00006531	20.814	-1.41052	0.527594	-2.6735	0.00750649	0.109172
R13H4.5	WBGene00011263	106.555	-0.457659	0.171166	-2.67377	0.00750033	0.109172
Y51H7C.15	WBGene00044439	438.992	0.292077	0.109391	2.67003	0.0075844	0.110193
unc-15	WBGene00006754	20427.7	0.591024	0.221435	2.66907	0.00760626	0.110399
W04G3.5	WBGene00012258	915.466	0.219466	0.0822622	2.66789	0.007633	0.110563
C30G12.6	WBGene00016277	1573.21	-0.171325	0.0642135	-2.66805	0.00762929	0.110563
Y20F4.8	WBGene00044435	14.1289	-1.89439	0.710466	-2.66641	0.0076666	0.110937
R07G3.7	WBGene00019943	1759.6	-0.158357	0.0594095	-2.66551	0.00768712	0.111122
twk-18	WBGene00006672	420.783	0.281779	0.105998	2.65833	0.00785281	0.113215
ZC412.3	WBGene00013884	320.677	0.319295	0.120132	2.65787	0.00786356	0.113215
T28A11.2	WBGene00020869	228.546	0.496745	0.186837	2.65871	0.00784413	0.113215
syd-9	WBGene00044068	209.8	-0.69923	0.263059	-2.65807	0.00785892	0.113215
F53H8.3	WBGene00018779	95.9361	-0.462252	0.173956	-2.65729	0.00787705	0.113295
eif-3.K	WBGene00001233	1926.06	0.164319	0.0618751	2.65565	0.00791563	0.113735
rcan-1	WBGene00004321	197.048	-0.340959	0.128517	-2.65302	0.00797746	0.114509
fbn-1	WBGene00022816	327.624	-1.14604	0.432241	-2.6514	0.00801582	0.114944
lips-3	WBGene00008655	33.8761	-1.43195	0.54035	-2.65003	0.00804842	0.115164
eak-7	WBGene00010671	2068.77	0.162747	0.0614061	2.65035	0.00804094	0.115164
tbc-10	WBGene00019915	261.591	0.359088	0.135518	2.64974	0.00805529	0.115164
col-52	WBGene00000629	14.7212	2.56731	0.969825	2.64719	0.00811641	0.115806
F52E10.4	WBGene00009935	27.6275	-1.49958	0.566469	-2.64725	0.00811496	0.115806
jac-1	WBGene00002175	595.568	0.393378	0.148684	2.64573	0.00815152	0.116034
npr-28	WBGene00018886	91.0564	-0.455926	0.172339	-2.64552	0.00815665	0.116034
mab-31	WBGene00021834	402.705	-0.37087	0.140153	-2.64619	0.00814045	0.116034
ugt-20	WBGene00019516	34.5176	-0.740093	0.279854	-2.64457	0.00817952	0.116243
C40A11.4	WBGene00016547	15.4191	-1.82873	0.691937	-2.64291	0.00821966	0.116698
sod-3	WBGene00004932	82.097	0.494121	0.186998	2.64239	0.00823238	0.116763
toca-1	WBGene00017298	460.411	0.432063	0.163749	2.63856	0.00832585	0.117972
arc-1	WBGene00000180	243.44	0.27709	0.105047	2.63778	0.00834512	0.118128
Y105E8A.28	WBGene00013685	13.3133	-1.21863	0.462097	-2.63717	0.0083602	0.118224
fbxb-119	WBGene00007182	23.7923	-1.01204	0.383865	-2.63645	0.00837794	0.118358
DH11.5	WBGene00008438	113.94	-0.498889	0.189265	-2.63593	0.00839075	0.118422
C28H8.14	WBGene00219838	52.3796	-0.690221	0.261904	-2.6354	0.00840376	0.118489
hot-4	WBGene00001989	15.9617	-1.35592	0.515174	-2.63197	0.00848916	0.119575
Y37H2A.7	WBGene00012567	33.0669	0.730291	0.277578	2.63094	0.00851484	0.119819
arrd-1	WBGene00020205	123.674	-1.01971	0.387651	-2.63049	0.00852607	0.119859
nuaf-1	WBGene00008225	591.281	0.189475	0.0720569	2.62952	0.00855067	0.120087
Y17G7B.21	WBGene00012472	2300.13	-0.15237	0.057958	-2.62896	0.00856452	0.12009
ech-1.2	WBGene00020347	6576.17	0.132877	0.0505459	2.62884	0.00856767	0.12009
kin-29	WBGene00002210	513.483	-0.36947	0.140604	-2.62773	0.00859573	0.120294
ttm-5	WBGene00013197	151.809	-0.55508	0.21125	-2.6276	0.00859902	0.120294
F56A11.5	WBGene00018925	1237.75	0.177601	0.0676249	2.62627	0.00863253	0.120645
C48B6.2	WBGene00016740	473.432	-0.248544	0.0946675	-2.62544	0.00865372	0.120823
idhg-2	WBGene00016266	495.971	0.375249	0.143004	2.62404	0.00868944	0.121203
F56D5.6	WBGene00010150	251.725	-0.442339	0.168667	-2.62255	0.00872733	0.121613
T08B2.11	WBGene00020349	254.548	0.309947	0.118233	2.6215	0.00875428	0.121849
cct-7	WBGene00020391	6079.33	0.250106	0.0954154	2.62123	0.00876125	0.121849
unc-42	WBGene00006778	26.7241	-1.89463	0.72334	-2.61928	0.00881162	0.12243
pxn-1	WBGene00004256	532.664	-0.340119	0.12989	-2.61852	0.00883122	0.122465
tba-1	WBGene00006528	16186.6	0.216658	0.0827307	2.61884	0.00882295	0.122465
W04A4.5	WBGene00012234	2093.06	-0.14485	0.0553683	-2.61612	0.00889345	0.123167
mct-6	WBGene00015676	1627.57	-0.282439	0.10797	-2.61591	0.00889905	0.123167
tra-1	WBGene00006604	1292.08	0.612361	0.234169	2.61504	0.00892179	0.123217
Y62H9A.3	WBGene00013391	2636.18	0.312362	0.11946	2.61478	0.00892854	0.123217
acp-6	WBGene00022245	7063.89	-0.594343	0.227255	-2.61531	0.00891459	0.123217
gst-1	WBGene00001749	2755.4	0.216847	0.0829429	2.61442	0.00893799	0.123229
zig-8	WBGene00006985	25.3125	-1.00865	0.38594	-2.61348	0.00896242	0.123447
cts-1	WBGene00000833	13541.1	0.128665	0.049262	2.61184	0.0090056	0.123922
B0001.5	WBGene00007090	1109.53	0.176011	0.0674501	2.6095	0.00906738	0.124652
Y48C3A.3	WBGene00012987	223.541	0.36995	0.14181	2.60878	0.00908654	0.124796
cpz-2	WBGene00000789	945.855	-0.354808	0.136045	-2.60803	0.00910654	0.124951
mars-1	WBGene00003415	5363.62	0.165187	0.0633675	2.60681	0.00913895	0.125013
C48B4.11	WBGene00008174	1109.81	-0.204362	0.0783944	-2.60684	0.00913816	0.125013
F42G10.1	WBGene00009645	480.162	0.345175	0.132426	2.60655	0.009146	0.125013
Y48G1C.13	WBGene00189949	83.2408	0.641883	0.246225	2.60689	0.00913675	0.125013
npp-13	WBGene00003799	2823.16	0.219719	0.0843298	2.60548	0.00917463	0.125284
T08D2.3	WBGene00011608	189.689	0.474088	0.18221	2.60188	0.00927143	0.126486
gfm-1	WBGene00009246	2767.14	0.203022	0.078111	2.59914	0.00934568	0.127377
B0353.1	WBGene00015155	395.017	0.251322	0.0967546	2.59752	0.00938989	0.127858
K10D11.6	WBGene00010750	59.1724	-0.498384	0.192291	-2.59182	0.00954689	0.129872
epi-1	WBGene00001328	3617.88	0.401827	0.155127	2.59031	0.00958895	0.130038
mdf-1	WBGene00003160	2798.99	-0.16775	0.0647513	-2.59068	0.00957852	0.130038
sul-2	WBGene00006309	15.5528	-1.06203	0.409916	-2.59084	0.00957428	0.130038
[truncated: 14,793 more rows]

## Sheet: PRDE1_5mHS.vs.PRDE1_Ctrl
gene.name	row	baseMean	log2FoldChange	lfcSE	stat	pvalue	padj
[truncated: 15,848 more rows]

## Sheet: sy441_30mHS.vs.sy441_Ctrl
gene.name	row	baseMean	log2FoldChange	lfcSE	stat	pvalue	padj
[truncated: 15,848 more rows]

[truncated: 6 more sheets: sy441_5mHS.vs.sy441_Ctrl, N2_30mHSRe.vs.N2_Ctrl, PRDE1_30mHSRe.vs.PRDE1_Ctrl, sy441_30mHSRe.vs.sy441_Ctrl, PRDE1_Ctrl.vs.N2_Ctrl, PRDE1_30mHS.vs.N2_30mHS]
