# Supplementary material
Source: Research Square preprint supplement (doi:10.21203/rs.3.rs-7966420/v1)
Supplement: Supplementary file 5 [file 762fc538eafcc38990c131ed.xlsx]

## Sheet: CSR.N2.30mHS.N2.Ctrl
genes	Log2FoldChage.mRNA	Log2FoldChage.22G.RNA	quadrant	quadrant.2	percent.label
R107.5	1.26165	-0.914937	q1	515	0.194175
hsp-110	0.913536	-1.1284	q1	515	0.194175
nurf-1	0.681872	0.498356	q2	89	1.1236
ttll-12	0.568918	-0.724338	q1	515	0.194175
dnj-13	0.523203	0.375765	q2	89	1.1236
Y54E10A.10	0.49538	-0.751239	q1	515	0.194175
mak-1	-0.572106	-0.742392	q3	26	3.84615
ZC262.7	2.52608	-0.713457	q1	515	0.194175
nol-6	0.833004	-0.500702	q1	515	0.194175
M142.5	0.480179	-0.389255	q1	515	0.194175
Y111B2A.12	0.6095	-1.03729	q1	515	0.194175
Y37E11B.5	0.662172	-0.44402	q1	515	0.194175
prp-19	0.302676	-0.753029	q1	515	0.194175
vps-34	0.375224	0.407696	q2	89	1.1236
cul-3	0.263439	-0.371886	q1	515	0.194175
fbf-2	0.576913	0.726543	q2	89	1.1236
sco-1	0.381284	-1.04347	q1	515	0.194175
gsr-1	0.333339	-0.525962	q1	515	0.194175
rig-4	0.769178	-1.09913	q1	515	0.194175
pro-3	0.611963	-0.764438	q1	515	0.194175
K03B4.2	0.301951	0.515423	q2	89	1.1236
rpoa-1	0.871714	-0.777829	q1	515	0.194175
Y49A3A.3	0.464221	0.410821	q2	89	1.1236
cyc-1	0.185868	-0.896599	q1	515	0.194175
pcn-1	0.273929	-1.14524	q1	515	0.194175
rha-2	0.695552	-0.641571	q1	515	0.194175
Y48C3A.14	0.371023	-0.407331	q1	515	0.194175
gpr-1	-0.489257	0.826448	q4	2	50
rps-7	0.234507	-0.377501	q1	515	0.194175
Y46E12BL.2	0.786772	-0.59585	q1	515	0.194175
fkb-6	0.305898	-0.812039	q1	515	0.194175
egg-3	0.366506	0.481066	q2	89	1.1236
imb-1	0.389691	-0.863685	q1	515	0.194175
cct-1	0.300005	-0.639975	q1	515	0.194175
kin-10	0.21126	-1.75871	q1	515	0.194175
glh-1	-0.274753	-0.65655	q3	26	3.84615
set-31	-0.439821	-0.519497	q3	26	3.84615
sgt-1	0.253229	-0.296335	q1	515	0.194175
snx-3	0.336809	-0.886866	q1	515	0.194175
eif-2Bdelta	0.245706	-0.806871	q1	515	0.194175
Y66D12A.16	0.579041	-0.556585	q1	515	0.194175
mppa-1	0.37291	-0.250941	q1	515	0.194175
hat-1	0.331153	-0.446844	q1	515	0.194175
pbs-2	0.287314	-0.718944	q1	515	0.194175
rsp-5	0.283175	-0.656067	q1	515	0.194175
rpb-2	0.261919	-0.955981	q1	515	0.194175
Y38E10A.22	0.47584	-0.55403	q1	515	0.194175
rpn-7	0.240628	-1.65499	q1	515	0.194175
cct-2	0.26581	-0.498211	q1	515	0.194175
M01E5.4	0.255048	-0.651957	q1	515	0.194175
spr-2	0.209512	-0.396737	q1	515	0.194175
gpr-2	-0.358691	-0.776776	q3	26	3.84615
F01G4.6	0.255815	-0.459707	q1	515	0.194175
cox-15	0.284839	-0.351518	q1	515	0.194175
Y75B8A.7	0.589861	-0.611112	q1	515	0.194175
rpl-35	0.257439	-0.365584	q1	515	0.194175
Y47G6A.18	0.544007	-0.543648	q1	515	0.194175
ima-2	0.338217	-0.727677	q1	515	0.194175
mcrs-1	0.383015	-0.570627	q1	515	0.194175
ego-1	0.430717	-0.792163	q1	515	0.194175
F13B12.6	0.362028	-0.31592	q1	515	0.194175
K02F3.2	0.473756	-0.485961	q1	515	0.194175
rml-1	0.254311	-1.38055	q1	515	0.194175
cfim-2	0.388116	-0.334437	q1	515	0.194175
trr-1	0.809112	-0.582484	q1	515	0.194175
paa-1	0.248092	-0.683494	q1	515	0.194175
eif-6	0.320633	-0.466695	q1	515	0.194175
ints-3	0.610545	-0.257107	q1	515	0.194175
eif-3.D	0.285687	0.989429	q2	89	1.1236
fars-3	0.278506	-1.20947	q1	515	0.194175
hsp-4	0.336316	-0.504263	q1	515	0.194175
unc-85	-0.418128	-1.42461	q3	26	3.84615
dap-3	0.235872	-1.3652	q1	515	0.194175
H05C05.1	0.594239	-0.623016	q1	515	0.194175
enol-1	0.276117	-1.02143	q1	515	0.194175
nmt-1	0.212155	-0.713408	q1	515	0.194175
H20J04.4	0.457016	-0.497964	q1	515	0.194175
rpl-13	0.259167	-1.61618	q1	515	0.194175
H14A12.3	0.451807	-1.355	q1	515	0.194175
rpn-5	0.244551	-0.721127	q1	515	0.194175
ufd-2	-0.2101	-0.60273	q3	26	3.84615
pgk-1	0.359294	-0.587861	q1	515	0.194175
eef-1A.1	0.324068	-1.18663	q1	515	0.194175
toe-1	0.36945	-0.751158	q1	515	0.194175
F13G3.7	0.351395	-1.14198	q1	515	0.194175
fbf-1	0.479541	-0.568979	q1	515	0.194175
ykt-6	0.375728	-0.860911	q1	515	0.194175
nath-10	0.464071	-0.747873	q1	515	0.194175
lst-1	0.372173	-0.374384	q1	515	0.194175
cogc-1	0.4356	-0.650538	q1	515	0.194175
lep-2	0.52949	-0.287928	q1	515	0.194175
miro-1	0.27812	1.04561	q2	89	1.1236
syx-18	0.276563	0.226172	q2	89	1.1236
Y75B8A.25	0.419651	-0.976463	q1	515	0.194175
mel-46	0.481797	-1.01282	q1	515	0.194175
smg-9	0.651059	-0.417692	q1	515	0.194175
F58B3.4	-0.260919	-1.13866	q3	26	3.84615
Y92H12BR.3	0.228071	-1.31579	q1	515	0.194175
glp-4	0.248021	-0.514636	q1	515	0.194175
cdc-25.1	0.307614	-0.689806	q1	515	0.194175
erfa-3	0.183728	-0.730639	q1	515	0.194175
pfs-2	0.482486	-1.0456	q1	515	0.194175
sdha-2	0.294842	0.372171	q2	89	1.1236
bub-1	-0.232591	-0.420406	q3	26	3.84615
tars-1	0.372214	-0.97101	q1	515	0.194175
aatf-1	0.369113	-1.54258	q1	515	0.194175
tbc-2	0.392628	-0.670444	q1	515	0.194175
vps-18	0.452304	0.306573	q2	89	1.1236
fln-1	0.503731	-0.520159	q1	515	0.194175
egl-45	0.375192	-0.600677	q1	515	0.194175
tsg-101	0.337622	-0.807569	q1	515	0.194175
acly-2	0.318016	-0.860469	q1	515	0.194175
ekl-6	0.380404	-0.8118	q1	515	0.194175
bath-42	0.215884	-0.495337	q1	515	0.194175
Y41E3.1	0.248491	-1.03501	q1	515	0.194175
F19F10.11	0.456451	-1.23402	q1	515	0.194175
cdc-48.2	0.377409	-0.952323	q1	515	0.194175
Y41C4A.9	0.371498	-0.69004	q1	515	0.194175
T23B3.1	0.187759	-0.720165	q1	515	0.194175
T24D1.3	0.420206	-0.9335	q1	515	0.194175
tceb-3	0.240224	-1.01796	q1	515	0.194175
lars-1	0.246368	-0.392744	q1	515	0.194175
acin-1	0.178552	-1.3553	q1	515	0.194175
M01H9.3	0.240621	-0.782962	q1	515	0.194175
nxf-1	0.368299	0.531528	q2	89	1.1236
rpn-6.1	0.229412	-0.299611	q1	515	0.194175
smg-3	0.335012	-0.828996	q1	515	0.194175
Y53F4B.21	0.801248	0.236564	q2	89	1.1236
abce-1	0.226674	-1.57868	q1	515	0.194175
eftu-2	0.213089	-0.799578	q1	515	0.194175
vps-16	0.329919	-0.273908	q1	515	0.194175
ubc-13	0.234445	-0.271175	q1	515	0.194175
tba-1	0.322674	-0.32435	q1	515	0.194175
pfn-1	0.223886	-0.821309	q1	515	0.194175
dpt-1	0.183684	-0.604151	q1	515	0.194175
rfc-3	0.20005	-0.592413	q1	515	0.194175
pph-4.1	0.309525	-0.661088	q1	515	0.194175
ebp-3	-18.2569	-0.576559	q3	26	3.84615
rpa-2	0.178678	-0.742741	q1	515	0.194175
ZK829.7	0.3017	-1.04335	q1	515	0.194175
Y57E12AL.1	0.244894	-1.23161	q1	515	0.194175
kel-20	0.285436	-0.748886	q1	515	0.194175
abcf-3	0.240596	-0.370981	q1	515	0.194175
utp-20	0.539795	-0.497955	q1	515	0.194175
ran-3	0.332308	-0.498925	q1	515	0.194175
pro-1	0.32812	0.890331	q2	89	1.1236
usp-50	0.373043	-0.980055	q1	515	0.194175
Y37E11AM.2	0.445933	-0.51953	q1	515	0.194175
C07D8.6	0.205457	-1.00543	q1	515	0.194175
ZK688.5	0.423264	-1.42048	q1	515	0.194175
atl-1	-0.239298	-1.2039	q3	26	3.84615
ears-1	0.444031	-0.920465	q1	515	0.194175
nol-14	0.487154	-1.32833	q1	515	0.194175
mdt-17	0.314746	-1.35768	q1	515	0.194175
rpt-1	0.276974	-1.37267	q1	515	0.194175
crml-1	0.273636	-0.366087	q1	515	0.194175
pam-1	0.184718	-1.13262	q1	515	0.194175
cdc-26	0.230984	-0.522334	q1	515	0.194175
rpn-3	0.163143	0.579411	q2	89	1.1236
stip-1	0.209375	-0.939347	q1	515	0.194175
ubr-4	0.519001	-0.86083	q1	515	0.194175
M116.5	0.38993	-0.576582	q1	515	0.194175
lin-53	0.251011	-0.269516	q1	515	0.194175
viln-1	0.354538	-0.796099	q1	515	0.194175
let-92	0.1367	-0.587711	q1	515	0.194175
mrps-22	0.245289	-0.476268	q1	515	0.194175
unc-71	0.416	-0.712832	q1	515	0.194175
ipgm-1	0.249749	-0.944797	q1	515	0.194175
H04M03.3	0.345654	-0.643312	q1	515	0.194175
tba-2	0.244731	-0.69941	q1	515	0.194175
F55F10.1	0.736457	-1.51283	q1	515	0.194175
heri-1	0.348836	-0.515891	q1	515	0.194175
dnpp-1	0.216613	1.00665	q2	89	1.1236
F56A11.5	0.250218	-0.250147	q1	515	0.194175
cct-4	0.199598	0.419607	q2	89	1.1236
aars-2	0.246359	0.419647	q2	89	1.1236
copg-1	0.192818	-0.631268	q1	515	0.194175
tofu-6	0.275083	-1.11168	q1	515	0.194175
Y71G12B.13	0.38728	-0.385668	q1	515	0.194175
ssb-1	0.187147	-0.757962	q1	515	0.194175
prp-38	0.255653	-0.446883	q1	515	0.194175
R05D11.9	0.414384	-0.431512	q1	515	0.194175
mcm-3	0.338696	-0.672076	q1	515	0.194175
uad-2	0.291856	0.538001	q2	89	1.1236
npp-24	0.254202	-0.612311	q1	515	0.194175
mma-1	0.281309	-1.02506	q1	515	0.194175
rbr-2	0.412965	-0.466005	q1	515	0.194175
gcn-1	0.78271	-1.19861	q1	515	0.194175
copa-1	0.308195	-1.15881	q1	515	0.194175
paxt-1	0.225994	-1.24487	q1	515	0.194175
spt-5	0.346353	-0.683493	q1	515	0.194175
rab-5	0.236006	-0.413562	q1	515	0.194175
pbs-1	0.234265	-0.712166	q1	515	0.194175
klp-16	-0.253165	-1.07826	q3	26	3.84615
htp-1	-0.326917	-0.759787	q3	26	3.84615
W08E12.7	0.256205	-1.23974	q1	515	0.194175
B0238.9	0.409	-0.62969	q1	515	0.194175
B0205.9	0.218319	-0.441028	q1	515	0.194175
chk-1	0.218156	-1.11555	q1	515	0.194175
M01F1.8	0.275525	-0.480916	q1	515	0.194175
cox-18	0.304322	-0.363535	q1	515	0.194175
R04D3.3	0.272345	-1.14783	q1	515	0.194175
rab-35	0.291809	-1.25494	q1	515	0.194175
qars-1	0.261234	-0.91265	q1	515	0.194175
deps-1	0.391781	-0.873895	q1	515	0.194175
prmt-1	0.179179	-0.448043	q1	515	0.194175
K04C2.2	0.23788	0.458116	q2	89	1.1236
nos-2	0.315223	-0.294475	q1	515	0.194175
arp-1	0.221492	-1.03595	q1	515	0.194175
nmy-2	0.377232	-0.454565	q1	515	0.194175
cpf-2	0.212672	-0.78863	q1	515	0.194175
gtap-2	0.256092	0.414782	q2	89	1.1236
hmg-12	0.311735	-0.582027	q1	515	0.194175
acs-4	0.391629	-0.688033	q1	515	0.194175
eif-2gamma	0.292395	-0.778724	q1	515	0.194175
mob-3	0.352746	-0.531557	q1	515	0.194175
cogc-4	0.415201	-0.483368	q1	515	0.194175
dyci-1	0.212898	-0.435711	q1	515	0.194175
pie-1	0.427698	0.469672	q2	89	1.1236
ddx-15	0.260064	-0.987047	q1	515	0.194175
eif-3.C	0.239811	-0.827564	q1	515	0.194175
act-2	0.271922	0.555173	q2	89	1.1236
orc-3	0.256622	-0.375296	q1	515	0.194175
F59A3.2	0.44672	-0.613703	q1	515	0.194175
Y54G11A.3	0.277721	-0.426532	q1	515	0.194175
Y67D8C.9	-0.79983	-0.920819	q3	26	3.84615
wago-1	0.280499	0.485899	q2	89	1.1236
rnr-1	0.385405	-0.688448	q1	515	0.194175
F59E12.1	0.29638	-0.274959	q1	515	0.194175
T09F3.5	0.308442	-0.552342	q1	515	0.194175
tsr-1	0.525369	-1.13418	q1	515	0.194175
F53C11.4	0.31157	-0.765495	q1	515	0.194175
dpf-5	0.277098	-0.950809	q1	515	0.194175
npp-6	0.346336	-1.24494	q1	515	0.194175
sel-5	0.365999	-2.03837	q1	515	0.194175
such-1	0.245713	-0.467502	q1	515	0.194175
pbs-6	0.26214	0.394666	q2	89	1.1236
meg-1	0.382861	-1.17918	q1	515	0.194175
Y54F10AR.2	0.241916	-0.520826	q1	515	0.194175
unc-26	0.537591	-0.547639	q1	515	0.194175
chs-1	0.293851	-0.551083	q1	515	0.194175
msh-2	0.224225	-0.940499	q1	515	0.194175
pif-1	0.323622	-0.344781	q1	515	0.194175
stt-3	0.400341	0.254146	q2	89	1.1236
pos-1	0.255189	-0.624118	q1	515	0.194175
tram-1	0.193613	-1.21228	q1	515	0.194175
npp-13	0.287965	0.387414	q2	89	1.1236
B0511.12	0.510348	-0.465043	q1	515	0.194175
F11A10.5	0.154882	-0.369058	q1	515	0.194175
cyk-7	0.363141	-0.459752	q1	515	0.194175
cki-2	0.183499	-0.362562	q1	515	0.194175
cpg-2	0.325157	-0.764075	q1	515	0.194175
perm-3	0.250194	-0.941571	q1	515	0.194175
dut-1	0.219416	0.645887	q2	89	1.1236
stam-1	0.21733	-0.959757	q1	515	0.194175
cdc-73	0.326822	-0.75616	q1	515	0.194175
rpt-2	0.189858	-0.352414	q1	515	0.194175
pgap-1	0.163239	-0.409046	q1	515	0.194175
nsf-1	0.357397	-1.09609	q1	515	0.194175
chtl-1	0.348261	-0.558383	q1	515	0.194175
clr-1	0.451917	-0.577623	q1	515	0.194175
mtx-1	0.289794	-0.740711	q1	515	0.194175
atp-2	0.28473	-0.932094	q1	515	0.194175
grld-1	0.210232	-0.461032	q1	515	0.194175
ucr-2.3	0.250959	0.509816	q2	89	1.1236
rad-23	0.125388	-0.390634	q1	515	0.194175
rpc-2	0.259766	-0.699786	q1	515	0.194175
raga-1	0.157676	-0.551943	q1	515	0.194175
sart-3	0.19921	-0.541342	q1	515	0.194175
rpl-5	0.327962	-0.462158	q1	515	0.194175
vamp-7	0.359949	-0.614996	q1	515	0.194175
sur-6	0.170903	-0.91656	q1	515	0.194175
C02B10.4	0.207056	-0.653293	q1	515	0.194175
tbc-17	0.389474	-0.418535	q1	515	0.194175
npp-21	0.471131	-0.699045	q1	515	0.194175
fbxa-215	0.215768	-0.508402	q1	515	0.194175
rpn-10	0.171696	0.644703	q2	89	1.1236
plrg-1	0.207287	-0.847	q1	515	0.194175
dgtr-1	0.298488	0.57261	q2	89	1.1236
taf-4	0.216381	-0.990018	q1	515	0.194175
gmpr-1	0.160892	-1.08794	q1	515	0.194175
B0491.6	0.268496	-0.648903	q1	515	0.194175
C34C12.8	0.224849	0.224635	q2	89	1.1236
let-858	0.443564	-0.827901	q1	515	0.194175
ptc-1	0.380091	-0.580916	q1	515	0.194175
npp-3	0.437128	-1.10323	q1	515	0.194175
rpn-2	0.368928	-0.601759	q1	515	0.194175
Y94H6A.5	0.471192	-0.541131	q1	515	0.194175
vps-35	0.201393	-0.593887	q1	515	0.194175
picc-1	0.308265	-0.393883	q1	515	0.194175
rpb-6	0.235059	-0.409393	q1	515	0.194175
hars-1	0.198034	-0.318359	q1	515	0.194175
rskn-1	0.337345	0.280442	q2	89	1.1236
F26G5.1	0.363103	-0.47531	q1	515	0.194175
parn-2	0.327998	-0.676979	q1	515	0.194175
spt-16	0.311477	-0.921632	q1	515	0.194175
F53F8.5	0.28472	0.442693	q2	89	1.1236
K10C3.4	0.26744	0.331193	q2	89	1.1236
ZK973.9	0.343438	0.257472	q2	89	1.1236
D2005.1	-1.28956	-0.650627	q3	26	3.84615
imph-1	0.497386	-0.354031	q1	515	0.194175
rpn-11	0.187288	-0.59325	q1	515	0.194175
lap-2	0.263031	-0.227183	q1	515	0.194175
unc-108	0.169137	-0.38097	q1	515	0.194175
teg-4	0.262332	-0.877447	q1	515	0.194175
ncap-1	0.264197	-0.688023	q1	515	0.194175
oxi-1	0.227046	-0.694678	q1	515	0.194175
kin-3	0.156728	-0.615033	q1	515	0.194175
evl-18	0.232935	-0.712971	q1	515	0.194175
hsp-1	0.432236	-0.654786	q1	515	0.194175
nifk-1	0.189825	-0.33375	q1	515	0.194175
panl-2	0.359457	-0.840433	q1	515	0.194175
chch-3	0.310003	-0.294844	q1	515	0.194175
msh-5	0.279093	-0.452085	q1	515	0.194175
zipt-15	0.26093	-0.557833	q1	515	0.194175
cdk-9	0.314347	0.637812	q2	89	1.1236
Y39B6A.43	0.324361	-0.676907	q1	515	0.194175
sars-2	0.248875	-0.675659	q1	515	0.194175
gop-1	0.344445	-0.661817	q1	515	0.194175
hmp-2	0.282224	-0.726902	q1	515	0.194175
hcp-2	0.270816	-0.734351	q1	515	0.194175
R02F2.4	0.224949	-1.29933	q1	515	0.194175
sftb-2	0.207093	-1.20379	q1	515	0.194175
smi-1	0.236544	-1.24806	q1	515	0.194175
dph-5	0.342007	0.44601	q2	89	1.1236
acly-1	0.445714	-0.661646	q1	515	0.194175
daz-1	0.366005	0.419235	q2	89	1.1236
ccf-1	0.38826	-0.673204	q1	515	0.194175
tag-153	0.315475	-1.22813	q1	515	0.194175
F37F2.2	0.27729	0.806979	q2	89	1.1236
cdc-48.1	0.310057	-0.580465	q1	515	0.194175
tofu-5	0.208535	-0.424515	q1	515	0.194175
skpt-1	0.216926	0.50077	q2	89	1.1236
rpoa-49	0.256889	-0.363191	q1	515	0.194175
zwl-1	0.237503	-0.750558	q1	515	0.194175
top-3	0.25706	-0.942537	q1	515	0.194175
noca-1	0.249422	-1.13182	q1	515	0.194175
Y71H2B.2	0.232817	-0.702093	q1	515	0.194175
yop-1	0.310614	-0.72611	q1	515	0.194175
mes-2	0.220872	-0.98222	q1	515	0.194175
phf-15	0.424545	0.469718	q2	89	1.1236
xpf-1	0.232202	0.229424	q2	89	1.1236
mom-2	0.39845	-0.974364	q1	515	0.194175
rsp-1	0.203255	-1.2213	q1	515	0.194175
tasp-1	0.1867	-0.439153	q1	515	0.194175
ubr-1	0.347588	0.678862	q2	89	1.1236
cyh-1	0.36191	-0.249642	q1	515	0.194175
ints-1	0.451411	-0.45147	q1	515	0.194175
iars-1	0.187951	-0.348313	q1	515	0.194175
gln-6	0.207192	-0.719139	q1	515	0.194175
etr-1	0.288424	-0.506689	q1	515	0.194175
rsr-2	0.265449	-0.868768	q1	515	0.194175
gip-1	0.229734	0.496397	q2	89	1.1236
let-363	0.436784	-0.617648	q1	515	0.194175
rpn-13	0.147509	-1.01749	q1	515	0.194175
mrpl-22	0.266644	-0.545956	q1	515	0.194175
luc-7L3	0.300087	0.430788	q2	89	1.1236
cdc-42	0.23492	-0.738449	q1	515	0.194175
tank-1	0.715909	-0.414395	q1	515	0.194175
R05D3.12	0.195134	0.750117	q2	89	1.1236
gldr-2	0.488734	-1.12982	q1	515	0.194175
F49D11.10	0.467925	-0.828429	q1	515	0.194175
kin-18	0.338909	-0.370797	q1	515	0.194175
sqv-6	0.275265	0.339174	q2	89	1.1236
F13H8.2	0.182652	-1.0691	q1	515	0.194175
spr-5	0.223079	-1.76424	q1	515	0.194175
cpsf-4	0.159544	-0.584228	q1	515	0.194175
vrk-1	0.19438	-0.239148	q1	515	0.194175
rbc-2	0.432802	-0.913676	q1	515	0.194175
sep-1	0.359928	-0.538974	q1	515	0.194175
sphk-1	-0.299845	-1.06731	q3	26	3.84615
lin-38	0.568908	-0.299731	q1	515	0.194175
vacl-14	0.231043	-0.977742	q1	515	0.194175
hrpf-2	0.206278	-0.930557	q1	515	0.194175
ebp-1	0.390247	0.607099	q2	89	1.1236
Y48B6A.13	0.319842	-1.00387	q1	515	0.194175
gfat-2	0.225959	-1.61353	q1	515	0.194175
igcm-3	-0.55302	-0.844184	q3	26	3.84615
rcor-1	0.306261	-0.913713	q1	515	0.194175
Y57A10A.8	0.284698	0.509503	q2	89	1.1236
uba-5	0.185388	0.43413	q2	89	1.1236
rin-1	0.369402	-0.644156	q1	515	0.194175
pgl-3	0.238001	-0.496417	q1	515	0.194175
npp-11	0.367473	0.717823	q2	89	1.1236
rnp-7	0.14234	-0.613465	q1	515	0.194175
T10C6.7	0.254882	-0.279553	q1	515	0.194175
dog-1	0.21551	1.63567	q2	89	1.1236
tbc-9	0.290677	-0.86344	q1	515	0.194175
tbc-3	0.189007	0.361968	q2	89	1.1236
act-3	0.398979	-0.326332	q1	515	0.194175
Y116A8C.27	0.258953	0.395092	q2	89	1.1236
ekl-4	0.304848	-0.740362	q1	515	0.194175
lab-1	-0.335162	-0.38172	q3	26	3.84615
set-5	0.381911	-0.811853	q1	515	0.194175
F44E7.4	0.264134	-0.370247	q1	515	0.194175
gmps-1	0.222882	0.551915	q2	89	1.1236
hil-5	0.328323	-1.12342	q1	515	0.194175
R74.8	0.205367	-0.996843	q1	515	0.194175
yars-1	0.185713	-0.930634	q1	515	0.194175
btbd-10	0.3094	-1.16106	q1	515	0.194175
rsy-1	0.187632	-0.89153	q1	515	0.194175
gld-4	0.354298	-0.59852	q1	515	0.194175
mog-5	0.21344	-0.920054	q1	515	0.194175
mrp-4	0.458931	-0.698621	q1	515	0.194175
mcm-6	0.200238	-1.09963	q1	515	0.194175
rpac-40	0.236813	-0.783456	q1	515	0.194175
lpd-3	0.521234	-0.518429	q1	515	0.194175
vig-1	0.244572	-0.541475	q1	515	0.194175
ptr-2	0.397571	0.736796	q2	89	1.1236
Y52B11A.10	0.200159	-0.444578	q1	515	0.194175
hrpr-1	0.250478	-0.656484	q1	515	0.194175
ced-10	0.303719	-0.470768	q1	515	0.194175
sop-3	0.503768	-1.10854	q1	515	0.194175
bub-3	0.165532	-0.881763	q1	515	0.194175
aldo-2	0.278212	-0.906471	q1	515	0.194175
prp-6	0.19268	-0.983302	q1	515	0.194175
csn-1	0.168305	-1.32237	q1	515	0.194175
mcd-1	0.503578	-0.998319	q1	515	0.194175
sec-15	0.279041	-0.629324	q1	515	0.194175
T09F3.2	0.17938	0.304568	q2	89	1.1236
cdk-12	0.457613	-0.881878	q1	515	0.194175
C32D5.11	0.202499	-0.711097	q1	515	0.194175
brf-1	0.329946	-0.45993	q1	515	0.194175
rpn-1	0.311809	-1.3603	q1	515	0.194175
tcc-1	0.302166	-0.653915	q1	515	0.194175
dhc-1	0.475713	-0.516306	q1	515	0.194175
ttc-7	0.31362	-0.82087	q1	515	0.194175
spg-7	0.268233	-0.670858	q1	515	0.194175
pptr-2	0.210489	-0.58252	q1	515	0.194175
let-70	0.150982	-0.802405	q1	515	0.194175
sqv-5	0.366982	-0.505042	q1	515	0.194175
sup-36	-0.377058	-0.684335	q3	26	3.84615
F26F4.5	0.231998	-0.385327	q1	515	0.194175
gcn-2	0.492836	-0.522404	q1	515	0.194175
arx-3	0.146658	-1.15436	q1	515	0.194175
acs-13	0.448	-0.683773	q1	515	0.194175
pacs-1	-0.141069	-0.949864	q3	26	3.84615
rnf-113	0.190514	0.367651	q2	89	1.1236
F32D1.7	0.287105	-1.29399	q1	515	0.194175
sfa-1	0.298682	-0.71428	q1	515	0.194175
cel-1	0.163142	-1.62763	q1	515	0.194175
adr-2	0.149455	0.609728	q2	89	1.1236
mars-1	0.186511	-0.783148	q1	515	0.194175
gtf-2F2	0.184864	-0.7485	q1	515	0.194175
cks-1	0.211093	-0.567164	q1	515	0.194175
F23B12.7	0.360729	-0.340934	q1	515	0.194175
efk-1	0.182554	-0.379602	q1	515	0.194175
rsp-2	0.230499	-0.90199	q1	515	0.194175
mei-2	0.161299	-1.78168	q1	515	0.194175
clec-91	0.220662	-0.431294	q1	515	0.194175
kup-1	0.167025	-0.771632	q1	515	0.194175
umps-1	0.210457	0.890231	q2	89	1.1236
Y52B11A.8	0.21259	-0.379411	q1	515	0.194175
erd-2.2	0.159127	-0.633594	q1	515	0.194175
T20B12.3	0.224873	-0.544861	q1	515	0.194175
T21B10.3	0.267456	-0.511479	q1	515	0.194175
lmn-1	0.16275	-1.27823	q1	515	0.194175
saps-1	0.177141	-0.306342	q1	515	0.194175
ima-1	0.221183	-0.592251	q1	515	0.194175
dagl-2	0.18077	-0.606582	q1	515	0.194175
rcq-5	0.236116	-0.595407	q1	515	0.194175
coh-3	0.361626	-0.614603	q1	515	0.194175
akap-1	0.416966	-0.900534	q1	515	0.194175
H14E04.2	0.214294	-0.704123	q1	515	0.194175
mut-16	0.460005	-0.412534	q1	515	0.194175
CC8.2	0.312377	-0.741505	q1	515	0.194175
Y54G9A.7	0.258168	-0.288398	q1	515	0.194175
ceh-100	0.693247	-0.656741	q1	515	0.194175
fcd-2	0.249338	-0.673802	q1	515	0.194175
ZK686.3	0.135374	-0.599378	q1	515	0.194175
tbb-2	0.271847	-0.887576	q1	515	0.194175
usp-39	0.175091	-0.621147	q1	515	0.194175
ZK524.4	0.414871	-0.554591	q1	515	0.194175
map-2	0.361179	-0.272232	q1	515	0.194175
F54D8.6	0.200634	-0.631399	q1	515	0.194175
adss-1	0.23707	-1.20243	q1	515	0.194175
gsp-2	0.112113	-2.05952	q1	515	0.194175
xpb-1	0.221661	-1.1744	q1	515	0.194175
eif-3.L	0.186678	-1.29236	q1	515	0.194175
rpt-4	0.146762	-0.336814	q1	515	0.194175
W03F8.4	0.191169	-0.742213	q1	515	0.194175
rsks-1	0.246122	-1.48627	q1	515	0.194175
era-1	0.34785	1.05543	q2	89	1.1236
klp-15	-0.205618	-0.505746	q3	26	3.84615
Y52B11A.3	0.188727	-0.852265	q1	515	0.194175
Y45F3A.9	0.279781	0.391271	q2	89	1.1236
sur-2	0.421534	-0.945057	q1	515	0.194175
M03C11.3	0.440459	-0.290014	q1	515	0.194175
npp-9	0.458433	-0.721259	q1	515	0.194175
dli-1	0.286373	-0.715067	q1	515	0.194175
otub-2	0.306292	-0.379724	q1	515	0.194175
cyb-1	0.34621	-1.6652	q1	515	0.194175
T24B8.7	0.515479	-0.813685	q1	515	0.194175
cnt-1	0.373894	-0.427177	q1	515	0.194175
kcc-1	0.351735	0.427217	q2	89	1.1236
ztf-7	0.242205	-1.13774	q1	515	0.194175
ehbp-1	0.203571	-1.14818	q1	515	0.194175
coq-8	0.204945	-1.39005	q1	515	0.194175
mlc-5	0.214008	-0.944308	q1	515	0.194175
srgp-1	0.233315	-0.888588	q1	515	0.194175
apb-1	0.322266	0.485892	q2	89	1.1236
herc-1	0.271545	-1.21922	q1	515	0.194175
algn-12	0.159975	-2.94224	q1	515	0.194175
T23H2.3	0.373302	-0.625705	q1	515	0.194175
Y53H1A.2	0.26321	-0.690493	q1	515	0.194175
ldb-1	-0.417918	-0.414186	q3	26	3.84615
gln-5	0.237999	0.648462	q2	89	1.1236
ctr-9	0.269739	-0.736674	q1	515	0.194175
pole-1	0.477161	-0.984678	q1	515	0.194175
edg-1	0.417772	-0.913399	q1	515	0.194175
ssl-1	0.556319	-0.824451	q1	515	0.194175
hrpk-1	0.256328	-0.482496	q1	515	0.194175
atg-5	0.197245	-0.5471	q1	515	0.194175
ula-1	0.186463	-0.717026	q1	515	0.194175
C17E4.6	0.178004	-0.874006	q1	515	0.194175
rpn-12	0.165596	-1.45385	q1	515	0.194175
rgr-1	0.358331	-0.875244	q1	515	0.194175
wdr-48	0.228279	0.638781	q2	89	1.1236
ife-3	0.191048	-0.371762	q1	515	0.194175
taf-6.2	0.410324	-0.602888	q1	515	0.194175
him-17	0.244289	-1.24317	q1	515	0.194175
mrps-2	0.186726	-0.665912	q1	515	0.194175
ape-1	0.246591	0.622815	q2	89	1.1236
magu-1	0.273007	-0.539731	q1	515	0.194175
rabn-5	0.22606	-0.498923	q1	515	0.194175
F02E9.10	0.158797	-1.12658	q1	515	0.194175
try-1	0.182771	-0.692968	q1	515	0.194175
C01B10.9	-0.173043	-0.327688	q3	26	3.84615
wht-7	0.285085	-0.590671	q1	515	0.194175
sec-23	0.340307	-0.89734	q1	515	0.194175
alx-1	0.336417	-0.753264	q1	515	0.194175
set-25	0.443948	0.313634	q2	89	1.1236
rab-7	0.236477	-0.846468	q1	515	0.194175
prp-8	0.354813	-1.01843	q1	515	0.194175
C36A4.4	0.190293	-0.838501	q1	515	0.194175
laf-1	0.376908	-0.58735	q1	515	0.194175
npp-14	0.288261	-0.525877	q1	515	0.194175
edc-4	0.328001	-0.598771	q1	515	0.194175
ari-1.1	0.159988	0.459251	q2	89	1.1236
nhr-86	0.243161	-0.337965	q1	515	0.194175
pck-2	0.200856	-0.720612	q1	515	0.194175
sftb-1	0.442098	-0.597151	q1	515	0.194175
dyn-1	0.419062	-1.33264	q1	515	0.194175
Y82E9BR.14	0.171164	-2.73466	q1	515	0.194175
vps-60	0.134046	-1.49844	q1	515	0.194175
C06A5.3	0.207509	-0.465506	q1	515	0.194175
C46A5.6	-0.193047	-1.12008	q3	26	3.84615
hsb-1	0.22361	-0.412197	q1	515	0.194175
gex-2	0.22827	0.592725	q2	89	1.1236
csn-6	0.292295	-0.365714	q1	515	0.194175
ipla-1	0.274892	-0.549405	q1	515	0.194175
math-33	0.30167	-0.755735	q1	515	0.194175
cogc-5	0.204684	-0.499223	q1	515	0.194175
H05L14.2	0.417972	-1.30607	q1	515	0.194175
ify-1	0.210281	-0.844115	q1	515	0.194175
rnp-3	0.141805	0.344619	q2	89	1.1236
rme-8	0.308929	-0.590626	q1	515	0.194175
cdc-14	0.280269	-0.722113	q1	515	0.194175
mei-1	0.251994	0.54654	q2	89	1.1236
rha-1	0.225571	-0.379336	q1	515	0.194175
hmgs-1	-0.250184	-0.841595	q3	26	3.84615
T07C4.3	0.338799	0.755602	q2	89	1.1236
plin-1	0.17592	-0.698114	q1	515	0.194175
mcm-7	0.374973	-0.543709	q1	515	0.194175
pid-2	0.278437	-1.29585	q1	515	0.194175
gss-1	-0.159105	-0.873054	q3	26	3.84615
chc-1	0.430445	-1.26463	q1	515	0.194175
cec-7	0.313201	-0.566355	q1	515	0.194175
zyg-1	0.178143	0.431057	q2	89	1.1236
sec-31	0.197337	-0.549598	q1	515	0.194175
dpy-28	0.358506	-0.922173	q1	515	0.194175
helq-1	0.35281	-1.48726	q1	515	0.194175
Y37E3.1	0.280133	-0.722578	q1	515	0.194175
mcm-5	0.159191	-0.466471	q1	515	0.194175
D2005.4	0.243426	-0.871223	q1	515	0.194175
patr-1	0.360309	-0.430296	q1	515	0.194175
rad-54.B	0.294573	-0.537981	q1	515	0.194175
eif-3.E	0.127746	0.408412	q2	89	1.1236
smc-3	0.209108	-0.569247	q1	515	0.194175
ect-2	0.406357	-0.799803	q1	515	0.194175
ced-4	0.271963	-0.973557	q1	515	0.194175
Y17G7B.18	0.259459	-0.360251	q1	515	0.194175
let-754	0.122522	-0.497819	q1	515	0.194175
smk-1	0.268481	0.466809	q2	89	1.1236
mom-5	0.139564	-0.510453	q1	515	0.194175
rrp-1	-0.16947	-0.540068	q3	26	3.84615
mig-38	0.471903	-0.648651	q1	515	0.194175
dnj-29	0.144126	-0.634659	q1	515	0.194175
agef-1	0.276575	-0.557432	q1	515	0.194175
mis-12	0.20416	-0.457754	q1	515	0.194175
rps-2	0.250912	-1.51099	q1	515	0.194175
tsn-1	0.280807	-0.903189	q1	515	0.194175
F45F2.10	0.331045	-0.843809	q1	515	0.194175
npp-10	0.441961	-0.387365	q1	515	0.194175
imb-2	0.250729	-0.995173	q1	515	0.194175
rod-1	0.323727	0.630818	q2	89	1.1236
ppk-2	0.332165	-0.641367	q1	515	0.194175
dnj-12	0.11597	-0.34482	q1	515	0.194175
let-611	0.151248	-0.935338	q1	515	0.194175
pdhk-2	0.163298	-0.788606	q1	515	0.194175
gld-1	0.321451	1.05532	q2	89	1.1236
ZK1010.2	0.154448	0.337471	q2	89	1.1236
sip-1	0.251293	-0.307497	q1	515	0.194175
prp-39	0.274768	-1.45372	q1	515	0.194175
F46B6.5	0.238699	-0.561116	q1	515	0.194175
hlh-3	-0.791033	0.245501	q4	2	50
T19H12.2	0.176352	0.60045	q2	89	1.1236
T19B4.5	0.211451	-0.583593	q1	515	0.194175
pad-1	0.549038	-0.339877	q1	515	0.194175
pbs-5	0.152596	-0.610955	q1	515	0.194175
Y4C6B.1	0.157776	0.489116	q2	89	1.1236
W04B5.5	0.218997	-1.08505	q1	515	0.194175
suds-3	0.188081	0.946017	q2	89	1.1236
prp-21	0.14565	-0.479041	q1	515	0.194175
adsl-1	0.159797	-0.663141	q1	515	0.194175
cdc-37	0.302674	-1.07676	q1	515	0.194175
znf-598	0.215888	-0.591576	q1	515	0.194175
ani-1	0.403832	0.797859	q2	89	1.1236
clh-3	0.246162	-0.713474	q1	515	0.194175
riok-1	0.42539	-0.665214	q1	515	0.194175
wdr-5.1	0.153865	-0.66428	q1	515	0.194175
let-716	0.25638	-0.963699	q1	515	0.194175
sun-1	0.149232	0.669655	q2	89	1.1236
mvk-1	0.285482	0.272095	q2	89	1.1236
W02B12.11	0.151081	-1.76841	q1	515	0.194175
Y54G11A.2	0.159775	0.345723	q2	89	1.1236
rab-30	0.257048	-1.04976	q1	515	0.194175
R11H6.2	0.143079	0.457114	q2	89	1.1236
lst-6	0.274394	-0.769448	q1	515	0.194175
wac-1.1	0.461403	-0.796645	q1	515	0.194175
pqe-1	0.399802	-1.09097	q1	515	0.194175
lem-3	0.275698	-0.421476	q1	515	0.194175

## Sheet: CSR.N2.5mHS.N2.Ctrl
genes	Log2FoldChage.mRNA	Log2FoldChage.22G.RNA	quadrant	quadrant.2	percent.label
aip-1	0.918492	-0.478148	q1	2	50
atf-7	0.232697	0.532403	q2	1	100
nurf-1	0.354988	-0.744382	q1	2	50
bub-1	-0.228663	-0.183568	q3	5	20
gpr-1	-0.371201	-0.948196	q3	5	20
glh-1	-0.213469	-0.842451	q3	5	20
snpc-3.1	-0.402479	-0.190573	q3	5	20
gpr-2	-0.250095	-0.549127	q3	5	20

## Sheet: CSR.N2.REC.N2.Ctrl
genes	Log2FoldChage.mRNA	Log2FoldChage.22G.RNA	quadrant	quadrant.2	percent.label
hsp-4	1.14581	0.591219	q2	6	16.6667
aip-1	1.76768	-0.877257	q1	24	4.16667
R107.5	-0.681175	-0.499113	q3	171	0.584795
aho-3	-0.408871	-0.954705	q3	171	0.584795
C37C3.2	-0.512522	-0.54309	q3	171	0.584795
ego-1	-0.739879	0.488372	q4	23	4.34783
coq-1	-0.638554	-0.620931	q3	171	0.584795
rpa-4	-0.963834	-0.383688	q3	171	0.584795
parg-1	-0.308423	-0.816539	q3	171	0.584795
fkh-3	0.828863	-0.957326	q1	24	4.16667
chk-2	-0.753116	-0.918935	q3	171	0.584795
C16A11.4	0.433458	-0.541459	q1	24	4.16667
Y38E10A.22	0.594665	-0.480721	q1	24	4.16667
F37C4.5	0.97422	-0.710671	q1	24	4.16667
K10C3.4	-0.48441	-0.614431	q3	171	0.584795
ppw-1	-0.352237	-0.498464	q3	171	0.584795
calu-1	0.560956	0.320614	q2	6	16.6667
Y17G7B.20	0.548155	-0.70725	q1	24	4.16667
let-754	-0.251003	-0.667388	q3	171	0.584795
dpt-1	-0.252348	-1.00579	q3	171	0.584795
dnj-13	0.385751	0.816581	q2	6	16.6667
enol-1	-0.311477	-0.615269	q3	171	0.584795
vps-34	-0.314159	-0.494843	q3	171	0.584795
C16A11.3	0.539555	0.954189	q2	6	16.6667
mboa-6	-0.221282	1.83861	q4	23	4.34783
C16A11.10	0.463134	-0.385213	q1	24	4.16667
dnj-11	-0.189284	-0.509627	q3	171	0.584795
pdxk-1	-0.367345	-0.516756	q3	171	0.584795
C14B9.8	-0.341735	-0.663863	q3	171	0.584795
F52B5.3	-0.350851	-0.660705	q3	171	0.584795
coh-4	-0.549227	-0.853006	q3	171	0.584795
tceb-3	-0.284335	-0.311325	q3	171	0.584795
C30G12.6	-0.299986	-1.03197	q3	171	0.584795
vps-54	-0.261963	-0.677167	q3	171	0.584795
cin-4	-0.57899	1.16555	q4	23	4.34783
alh-3	-0.320186	-0.599959	q3	171	0.584795
H31G24.3	-0.501077	-0.398667	q3	171	0.584795
F01F1.15	-0.392577	-0.714897	q3	171	0.584795
pam-1	-0.217778	-1.0429	q3	171	0.584795
dnj-12	0.189912	-1.06959	q1	24	4.16667
rig-4	-0.595991	-0.392137	q3	171	0.584795
raga-1	-0.20225	-0.506119	q3	171	0.584795
W02B12.11	-0.251125	-0.762457	q3	171	0.584795
pdhb-1	-0.229602	-0.508821	q3	171	0.584795
eif-2A	-0.165321	-0.397366	q3	171	0.584795
spg-7	-0.378128	-0.73813	q3	171	0.584795
mut-14	-0.301455	1.88534	q4	23	4.34783
vha-16	-0.235611	-0.582331	q3	171	0.584795
Y105E8A.20	-0.309647	-0.75991	q3	171	0.584795
eif-3.C	-0.273123	-0.326485	q3	171	0.584795
cpsf-1	-0.426008	-0.933425	q3	171	0.584795
vps-51	0.309208	-0.543425	q1	24	4.16667
glh-4	-0.325829	-0.566191	q3	171	0.584795
cest-33	-0.516851	-1.18211	q3	171	0.584795
tomm-70	-0.236724	-0.655997	q3	171	0.584795
him-14	-0.27816	-0.653022	q3	171	0.584795
M01H9.3	0.236723	-0.882121	q1	24	4.16667
sun-1	-0.224626	-0.551014	q3	171	0.584795
slc-30A5	-0.211553	-0.415417	q3	171	0.584795
glh-1	-0.216678	-0.414492	q3	171	0.584795
dars-2	-0.282421	-0.390203	q3	171	0.584795
F13H8.2	-0.225528	-0.497603	q3	171	0.584795
atl-1	-0.240063	-0.642757	q3	171	0.584795
mdh-2	-0.266387	-0.870829	q3	171	0.584795
ZK829.7	-0.294172	-0.393275	q3	171	0.584795
T05H10.1	-0.290337	-1.18793	q3	171	0.584795
uba-5	-0.22885	-0.811916	q3	171	0.584795
glp-4	-0.22276	-0.595895	q3	171	0.584795
plin-1	0.243807	-0.397855	q1	24	4.16667
app-1	-0.23519	-0.706594	q3	171	0.584795
mut-7	-0.240992	-0.439831	q3	171	0.584795
odr-4	-0.227583	1.83382	q4	23	4.34783
ubc-7	-0.269919	-0.469288	q3	171	0.584795
F55F8.3	-0.273337	-0.528586	q3	171	0.584795
vps-35	-0.219219	-0.518914	q3	171	0.584795
pigm-1	-0.282216	-0.313124	q3	171	0.584795
unc-85	0.334966	-0.713617	q1	24	4.16667
acly-2	-0.277789	-0.972586	q3	171	0.584795
cki-2	-0.192012	-0.293337	q3	171	0.584795
coq-8	-0.254918	-0.649303	q3	171	0.584795
atf-7	0.198453	-0.694626	q1	24	4.16667
heri-1	-0.33094	-0.443526	q3	171	0.584795
smc-5	-0.214876	-0.36659	q3	171	0.584795
D2005.4	-0.317124	-0.585664	q3	171	0.584795
mdh-1	-0.258854	-1.29151	q3	171	0.584795
rpb-2	-0.189857	-0.497338	q3	171	0.584795
ZK686.3	-0.16178	-0.373136	q3	171	0.584795
sti-1	0.231702	-0.578124	q1	24	4.16667
copg-1	-0.179718	-0.370477	q3	171	0.584795
pes-9	-0.276742	-0.808779	q3	171	0.584795
F25G6.9	-0.23071	-0.541866	q3	171	0.584795
rrf-3	-0.288584	-0.616357	q3	171	0.584795
acdh-12	-0.234494	-1.27048	q3	171	0.584795
let-92	-0.12316	-0.538761	q3	171	0.584795
drh-3	-0.239319	-0.786982	q3	171	0.584795
unc-32	-0.172219	-1.35755	q3	171	0.584795
viln-1	-0.314678	-0.394069	q3	171	0.584795
T22D1.5	-0.231228	-0.468293	q3	171	0.584795
C28A5.2	-0.331616	-0.718569	q3	171	0.584795
alh-9	-0.348737	-0.747326	q3	171	0.584795
clec-91	-0.249845	-0.669262	q3	171	0.584795
K10C3.5	-0.21704	0.621252	q4	23	4.34783
rde-1	-0.220957	-0.591264	q3	171	0.584795
dnj-29	-0.178896	-0.781335	q3	171	0.584795
F19B10.10	-0.337749	-0.444416	q3	171	0.584795
hsp-60	-0.296695	-0.327245	q3	171	0.584795
lst-6	-0.345197	-0.700644	q3	171	0.584795
fars-1	-0.177988	-0.505116	q3	171	0.584795
rmh-1	-0.295878	-0.799362	q3	171	0.584795
ttc-37	-0.288662	-0.601149	q3	171	0.584795
dut-1	-0.207597	-0.318883	q3	171	0.584795
uso-1	-0.276311	-0.99139	q3	171	0.584795
gop-1	-0.343992	-0.719006	q3	171	0.584795
fbf-2	-0.325007	-0.618744	q3	171	0.584795
clu-1	-0.377405	-0.902946	q3	171	0.584795
zim-3	-0.20135	-0.555651	q3	171	0.584795
elof-1	0.229139	-0.400855	q1	24	4.16667
cdc-25.1	-0.232538	-0.605072	q3	171	0.584795
Y92H12BR.3	-0.17238	-0.601824	q3	171	0.584795
sur-6	-0.159664	-0.633756	q3	171	0.584795
Y48C3A.14	-0.220175	-0.617408	q3	171	0.584795
erfa-1	-0.216939	0.319977	q4	23	4.34783
gale-1	-0.222587	-0.317579	q3	171	0.584795
pisy-1	0.295931	-0.752272	q1	24	4.16667
egg-3	-0.226214	-0.930775	q3	171	0.584795
T22D1.3	-0.149725	-0.886487	q3	171	0.584795
mma-1	-0.234127	0.881931	q4	23	4.34783
ref-1	0.542598	1.23554	q2	6	16.6667
rde-12	-0.266044	-0.30671	q3	171	0.584795
vps-8	-0.548309	-0.663268	q3	171	0.584795
pcn-1	-0.156774	-0.81288	q3	171	0.584795
set-32	-0.349828	-0.444199	q3	171	0.584795
panl-2	-0.334584	-1.21575	q3	171	0.584795
czw-1	-0.195257	-0.679137	q3	171	0.584795
erfa-3	-0.133236	0.585259	q4	23	4.34783
cyb-2.1	-0.203402	-0.549584	q3	171	0.584795
pid-5	-0.309539	2.1918	q4	23	4.34783
R06F6.12	-0.22838	-0.411751	q3	171	0.584795
gmpr-1	-0.145224	-0.449474	q3	171	0.584795
gpr-2	0.231278	-0.551227	q1	24	4.16667
K02F3.2	-0.306775	-0.571826	q3	171	0.584795
pezo-1	-0.357177	-0.560089	q3	171	0.584795
spop-1	-0.229236	-0.699016	q3	171	0.584795
arp-1	-0.183414	-0.681071	q3	171	0.584795
R74.8	-0.198579	-0.770019	q3	171	0.584795
rpn-6.1	-0.170087	-0.506598	q3	171	0.584795
polh-1	-0.199528	-0.657685	q3	171	0.584795
ykt-6	-0.256902	-0.338683	q3	171	0.584795
C23G10.7	0.216669	-1.26544	q1	24	4.16667
H05C05.1	-0.388814	-0.934887	q3	171	0.584795
imb-1	-0.225952	1.0734	q4	23	4.34783
vps-16	-0.240642	-0.761086	q3	171	0.584795
ints-3	-0.385005	-1.316	q3	171	0.584795
fem-2	-0.229291	0.572893	q4	23	4.34783
dpf-5	-0.224657	-0.372602	q3	171	0.584795
lst-1	-0.247739	-0.417344	q3	171	0.584795
mus-101	-0.199767	0.701991	q4	23	4.34783
ret-1	-0.156484	0.319948	q4	23	4.34783
met-2	-0.204663	1.55873	q4	23	4.34783
erd-2.2	-0.155208	-0.657694	q3	171	0.584795
mog-5	-0.199232	-0.790965	q3	171	0.584795
lin-5	-0.172486	-0.572365	q3	171	0.584795
drp-1	-0.209839	-0.641147	q3	171	0.584795
ima-2	-0.205363	-0.407195	q3	171	0.584795
clh-3	-0.266072	-0.478103	q3	171	0.584795
Y47G6A.18	-0.323683	0.596832	q4	23	4.34783
mei-2	-0.153234	-0.816722	q3	171	0.584795
dohh-1	0.243689	-0.785502	q1	24	4.16667
cul-3	-0.126038	-0.558052	q3	171	0.584795
fbxc-32	0.372245	-0.740953	q1	24	4.16667
C14C11.2	-0.210637	-0.690739	q3	171	0.584795
him-17	-0.241619	-0.23892	q3	171	0.584795
vrk-1	-0.172715	-0.601729	q3	171	0.584795
dcr-1	-0.286811	-0.386436	q3	171	0.584795
glh-2	-0.207654	-0.949868	q3	171	0.584795
tbcd-1	-0.231137	-0.882129	q3	171	0.584795
dnpp-1	-0.160494	1.18742	q4	23	4.34783
rod-1	-0.332274	-0.978227	q3	171	0.584795
cul-4	-0.176815	-1.56768	q3	171	0.584795
mcm-5	-0.161492	-0.828138	q3	171	0.584795
mct-5	-0.169505	0.233148	q4	23	4.34783
sdha-2	-0.192206	-0.359266	q3	171	0.584795
arf-1	-0.231463	-0.464742	q3	171	0.584795
eef-1G	-0.123988	-1.10876	q3	171	0.584795
npp-15	-0.189443	-0.71788	q3	171	0.584795
Y53F4B.21	-0.542774	-1.22744	q3	171	0.584795
C28A5.1	-0.3409	-1.8409	q3	171	0.584795
hcp-3	0.2025	-0.708164	q1	24	4.16667
C07D8.6	-0.142265	-0.58426	q3	171	0.584795
Y82E9BR.18	-0.184245	-1.11387	q3	171	0.584795
knl-1	-0.18804	-1.18054	q3	171	0.584795
ikke-1	0.197443	0.52016	q2	6	16.6667
ctf-4	-0.186062	-0.609392	q3	171	0.584795
ubq-1	0.228868	-0.957769	q1	24	4.16667
gfat-2	-0.193084	-0.551477	q3	171	0.584795
zyg-1	-0.176266	-0.9177	q3	171	0.584795
cyb-2.2	-0.169536	-0.502896	q3	171	0.584795
eif-2Bdelta	-0.134163	-1.42596	q3	171	0.584795
ensa-1	-0.251693	1.4527	q4	23	4.34783
mrps-30	-0.19622	-0.629946	q3	171	0.584795
mcm-6	-0.173254	0.975211	q4	23	4.34783
gon-4	-0.229839	-0.683004	q3	171	0.584795
cul-5	-0.119366	-0.741026	q3	171	0.584795
C35D10.7	-0.166025	-1.10884	q3	171	0.584795
symk-1	-0.224694	-0.412565	q3	171	0.584795
hsp-90	0.136407	-0.67842	q1	24	4.16667
atad-3	-0.171806	-0.291208	q3	171	0.584795
utp-20	-0.360608	-0.770717	q3	171	0.584795
mrps-34	-0.205303	-0.766905	q3	171	0.584795
Y53C12A.6	-0.570871	-0.526343	q3	171	0.584795
magu-1	-0.255678	-0.593541	q3	171	0.584795
cpb-3	-0.183201	-0.520846	q3	171	0.584795
fars-3	-0.159511	-0.530525	q3	171	0.584795
toe-1	-0.22076	-0.44151	q3	171	0.584795
saps-1	-0.156487	0.45434	q4	23	4.34783
gcn-2	-0.424799	-0.561958	q3	171	0.584795
acdh-3	-0.180762	-0.797993	q3	171	0.584795
ragc-1	-0.136948	-0.437023	q3	171	0.584795
algn-9	-0.159377	0.455956	q4	23	4.34783
set-25	-0.405014	-0.326914	q3	171	0.584795
mpk-1	-0.157336	-0.908407	q3	171	0.584795
mrps-9	-0.218037	-0.577741	q3	171	0.584795
dnj-19	0.102068	-0.373632	q1	24	4.16667
C32D5.11	-0.170719	0.474614	q4	23	4.34783

## Sheet: CSR.PRDE1.30mHS.PRDE1.Ctrl
genes	Log2FoldChage.mRNA	Log2FoldChage.22G.RNA	quadrant	quadrant.2	percent.label
R107.5	1.58226	-0.687479	q1	38	2.63158
nurf-1	0.886959	-0.305974	q1	38	2.63158
dnj-13	0.720784	-0.653769	q1	38	2.63158
hsp-110	0.831937	-0.575872	q1	38	2.63158
ZC262.7	3.19865	-0.351238	q1	38	2.63158
W03F9.1	0.929124	-0.697012	q1	38	2.63158
ttll-12	0.577396	-0.995577	q1	38	2.63158
set-31	-0.621681	-0.50576	q3	25	4
atl-1	-0.388921	-0.840004	q3	25	4
ufd-2	-0.291772	-0.895115	q3	25	4
Y111B2A.12	0.538014	-0.264333	q1	38	2.63158
gpr-1	-0.498822	-0.961301	q3	25	4
pacs-1	-0.242203	-0.893005	q3	25	4
klp-16	-0.351864	-0.8963	q3	25	4
vps-34	0.323572	-0.651062	q1	38	2.63158
C07D8.6	0.265808	-0.341745	q1	38	2.63158
dpt-1	0.230132	-0.576503	q1	38	2.63158
gpr-2	-0.362354	-0.424027	q3	25	4
nol-6	0.635059	-0.695948	q1	38	2.63158
hasp-1	-0.282113	-0.602611	q3	25	4
hmgs-1	-0.410504	-0.733194	q3	25	4
klp-15	-0.31469	-0.723064	q3	25	4
sco-1	0.272982	-0.497165	q1	38	2.63158
pck-2	0.304734	-0.374143	q1	38	2.63158
lin-65	0.568728	-0.251167	q1	38	2.63158
rha-2	0.543839	-0.356387	q1	38	2.63158
mut-7	-0.265993	-1.96749	q3	25	4
fkb-6	0.246331	-0.703126	q1	38	2.63158
Y37E11B.5	0.445298	-1.41418	q1	38	2.63158
memi-2	-0.296868	-0.641531	q3	25	4
enol-1	0.25203	0.279434	q2	2	50
C49F5.6	0.341957	-0.221971	q1	38	2.63158
spr-1	-0.323803	-0.928995	q3	25	4
mep-1	-0.270993	1.17528	q4	2	50
rpn-10	0.200934	-0.338544	q1	38	2.63158
htp-1	-0.350706	-0.662783	q3	25	4
rpoa-1	0.63499	-1.43984	q1	38	2.63158
pde-3	0.710002	-0.300506	q1	38	2.63158
Y75B8A.25	0.385359	-1.36657	q1	38	2.63158
ints-3	0.5197	-0.790252	q1	38	2.63158
snpc-3.1	-0.422676	-0.412498	q3	25	4
trr-1	0.661346	-0.579677	q1	38	2.63158
rde-1	-0.249902	-0.46295	q3	25	4
kca-1	-0.242238	-0.964939	q3	25	4
hmgr-1	-0.234753	-0.553094	q3	25	4
glh-1	-0.197481	-1.31467	q3	25	4
Y54E10A.10	0.250947	-1.01084	q1	38	2.63158
acly-1	0.480649	-1.66609	q1	38	2.63158
T06E6.1	-0.178796	-0.444261	q3	25	4
Y75B8A.7	0.437407	-0.538502	q1	38	2.63158
bub-1	-0.195545	-1.17335	q3	25	4
rpoa-2	0.37596	-0.340108	q1	38	2.63158
sdha-2	0.241209	-0.465388	q1	38	2.63158
Y47G6A.18	0.399657	-0.648069	q1	38	2.63158
Y46E12BL.2	0.525475	-0.649161	q1	38	2.63158
sec-15	0.314645	-1.06225	q1	38	2.63158
usp-14	0.199068	-1.07748	q1	38	2.63158
unc-85	-0.30622	-0.485446	q3	25	4
air-2	-0.206424	-0.455404	q3	25	4
nol-14	0.413872	-0.480822	q1	38	2.63158
toe-1	0.275175	-0.38382	q1	38	2.63158
pgk-1	0.264102	-1.17027	q1	38	2.63158
F55G1.6	-0.204375	0.727855	q4	2	50
lep-2	0.396161	0.592897	q2	2	50
cct-2	0.172639	-0.212292	q1	38	2.63158
F58B3.4	-0.189252	-1.01791	q3	25	4
cya-1	-0.182413	-0.851867	q3	25	4

## Sheet: CSR.PRDE1.5mHS.PRDE1.Ctrl
genes	Log2FoldChage.mRNA	Log2FoldChage.22G.RNA	quadrant	quadrant.2	percent.label
R107.5	1.02216	-0.404983	q1	6	16.6667
aip-1	0.994895	-0.694374	q1	6	16.6667
W03F9.1	0.921763	-0.51825	q1	6	16.6667
hsp-110	0.579845	-0.358874	q1	6	16.6667
nurf-1	0.559372	-0.368525	q1	6	16.6667
C16A11.4	-0.397595	-0.501213	q3	29	3.44828
ufd-2	-0.266957	-0.767376	q3	29	3.44828
pacs-1	-0.259367	-0.761895	q3	29	3.44828
zyg-11	-0.469804	-0.452285	q3	29	3.44828
cya-1	-0.304696	-0.910181	q3	29	3.44828
snpc-3.1	-0.536087	-0.851304	q3	29	3.44828
set-31	-0.432836	-0.402958	q3	29	3.44828
klp-16	-0.31985	-0.548693	q3	29	3.44828
bub-1	-0.252379	-0.249836	q3	29	3.44828
cki-2	-0.237088	-0.326195	q3	29	3.44828
tebp-2	-0.415022	-0.459445	q3	29	3.44828
mdf-1	-0.274547	-0.313787	q3	29	3.44828
mut-14	-0.300132	-0.298701	q3	29	3.44828
gpr-1	-0.388668	-0.452523	q3	29	3.44828
gpr-2	-0.31181	-0.304538	q3	29	3.44828
mep-1	-0.281998	-0.448444	q3	29	3.44828
nud-2	0.234076	-0.395316	q1	6	16.6667
npp-1	-0.23621	-0.324732	q3	29	3.44828
mut-7	-0.250786	-0.727633	q3	29	3.44828
zen-4	-0.244799	-0.372743	q3	29	3.44828
dsh-2	-0.250715	-0.549503	q3	29	3.44828
syp-4	-0.280289	-0.332483	q3	29	3.44828
hum-2	-0.192241	-0.387355	q3	29	3.44828
rrf-3	-0.299025	-0.334983	q3	29	3.44828
klp-15	-0.249201	-0.342898	q3	29	3.44828
gex-3	-0.234122	-0.279383	q3	29	3.44828
toe-1	-0.29103	-0.633915	q3	29	3.44828
Y59E9AL.36	-0.235749	-0.296517	q3	29	3.44828
jamp-1	-0.189945	-0.391784	q3	29	3.44828
zyg-12	-0.213535	-0.452273	q3	29	3.44828

## Sheet: CSR.PRDE1.REC.PRDE1.Ctrl
genes	Log2FoldChage.mRNA	Log2FoldChage.22G.RNA	quadrant	quadrant.2	percent.label
hsp-4	1.70274	0.924604	q2	34	2.94118
aip-1	2.5834	1.18254	q2	34	2.94118
ttll-12	1.11825	-0.260752	q1	52	1.92308
M01H9.3	0.851106	-0.40929	q1	52	1.92308
Y17G7B.21	0.758969	0.761367	q2	34	2.94118
C16A11.4	0.894764	0.544536	q2	34	2.94118
R107.5	-0.797598	-0.500702	q3	22	4.54545
gst-1	0.817326	0.167537	q2	34	2.94118
Y43B11AR.3	1.14798	-0.842434	q1	52	1.92308
lem-4	0.716698	-0.931278	q1	52	1.92308
xbp-1	0.495312	1.0025	q2	34	2.94118
Y38E10A.22	0.844494	1.71066	q2	34	2.94118
dnj-12	0.373431	1.54776	q2	34	2.94118
coq-1	-0.684433	2.53303	q4	11	9.09091
snpc-3.1	0.80919	-1.00962	q1	52	1.92308
snf-1	-0.519008	-0.260032	q3	22	4.54545
F46B6.6	-0.521847	-0.343538	q3	22	4.54545
scp-1	0.552627	1.67909	q2	34	2.94118
Y17G7B.20	0.639216	-0.445414	q1	52	1.92308
klp-16	0.42366	1.02071	q2	34	2.94118
ego-1	-0.550119	1.84979	q4	11	9.09091
elof-1	0.414374	-0.752635	q1	52	1.92308
dnj-13	0.421196	-0.709386	q1	52	1.92308
pde-2	0.376919	-0.482843	q1	52	1.92308
unc-85	0.514903	-0.728617	q1	52	1.92308
C23G10.7	0.410897	-1.09069	q1	52	1.92308
sti-1	0.365461	0.768892	q2	34	2.94118
hsp-90	0.282423	-0.919343	q1	52	1.92308
har-1	0.431705	-0.422278	q1	52	1.92308
atf-7	0.297396	0.423403	q2	34	2.94118
snpc-3.2	0.754532	-0.983891	q1	52	1.92308
vps-54	-0.295226	-0.650578	q3	22	4.54545
dhod-1	-0.26068	-0.334662	q3	22	4.54545
memi-1	0.353263	0.620808	q2	34	2.94118
C16A11.10	0.490438	0.648654	q2	34	2.94118
fbxa-114	0.555697	-0.692939	q1	52	1.92308
klp-15	0.325005	-0.656424	q1	52	1.92308
rig-4	-0.624547	-0.610871	q3	22	4.54545
F54A3.2	0.546361	-0.883842	q1	52	1.92308
F13D12.5	0.293671	2.62601	q2	34	2.94118
atl-1	0.275362	-0.580534	q1	52	1.92308
nmad-1	0.359155	-0.711918	q1	52	1.92308
Y66D12A.10	0.45525	-0.731677	q1	52	1.92308
rrp-1	0.265057	1.25784	q2	34	2.94118
parg-1	-0.207707	-0.564139	q3	22	4.54545
nap-1	0.217996	-0.466754	q1	52	1.92308
pde-3	-0.759509	-1.14854	q3	22	4.54545
gpi-1	-0.240098	-0.461733	q3	22	4.54545
C16A11.3	0.453418	0.657398	q2	34	2.94118
eif-3.C	-0.26938	1.38954	q4	11	9.09091
pid-4	0.357608	-0.860635	q1	52	1.92308
R02F2.1	0.496579	-0.619327	q1	52	1.92308
tufm-1	-0.162998	0.870151	q4	11	9.09091
T06E6.1	0.203839	-0.802717	q1	52	1.92308
ikke-1	0.287028	0.53059	q2	34	2.94118
ain-2	0.268793	-1.67564	q1	52	1.92308
rae-1	0.163867	-0.540398	q1	52	1.92308
vps-51	0.291452	-0.47673	q1	52	1.92308
Y54E5A.5	0.250952	-0.723902	q1	52	1.92308
C16A3.6	0.264588	0.734962	q2	34	2.94118
C46A5.6	0.26529	1.59969	q2	34	2.94118
lpd-7	0.204076	-0.688433	q1	52	1.92308
catp-8	0.224767	0.534596	q2	34	2.94118
nyn-1	0.347163	1.29805	q2	34	2.94118
ssb-1	0.184224	1.83721	q2	34	2.94118
ZK512.2	0.201305	-0.879608	q1	52	1.92308
set-31	0.335338	-0.411168	q1	52	1.92308
cct-5	0.191744	0.886044	q2	34	2.94118
pus-1	0.253286	0.633111	q2	34	2.94118
dohh-1	0.299327	1.3226	q2	34	2.94118
vha-19	-0.214753	3.94084	q4	11	9.09091
cit-1.2	0.322491	-0.629641	q1	52	1.92308
ttc-37	-0.313247	-0.64743	q3	22	4.54545
uba-1	0.29731	-0.56256	q1	52	1.92308
ahsa-1	0.249198	-0.481067	q1	52	1.92308
cel-1	0.195173	-0.789644	q1	52	1.92308
nkcc-1	0.402769	0.54239	q2	34	2.94118
clu-1	-0.403744	-0.903702	q3	22	4.54545
gon-4	-0.301163	-0.664207	q3	22	4.54545
tat-1	-0.370457	-0.638835	q3	22	4.54545
csn-4	0.213003	-0.774657	q1	52	1.92308
ubr-4	-0.453419	-0.56682	q3	22	4.54545
mip-2	0.223908	-0.438301	q1	52	1.92308
rnf-113	0.217117	1.21543	q2	34	2.94118
klp-18	0.333272	-0.421864	q1	52	1.92308
ddx-23	0.213341	-1.12284	q1	52	1.92308
alkb-1	-0.216762	1.16182	q4	11	9.09091
sup-17	-0.185098	0.395651	q4	11	9.09091
exo-3	0.211856	1.56087	q2	34	2.94118
uba-5	-0.198508	0.55046	q4	11	9.09091
pigm-1	-0.257734	-0.303974	q3	22	4.54545
fkb-6	0.188561	-0.355511	q1	52	1.92308
H05C05.1	-0.422914	-0.520205	q3	22	4.54545
vps-34	-0.204992	-0.224277	q3	22	4.54545
mdt-1.2	0.336591	-0.532085	q1	52	1.92308
syp-1	0.184258	-0.484195	q1	52	1.92308
pdxk-1	-0.233472	0.563772	q4	11	9.09091
set-25	-0.50159	-1.58579	q3	22	4.54545
kcmf-1	0.203686	-0.722372	q1	52	1.92308
maco-1	-0.235552	1.01738	q4	11	9.09091
cls-2	0.472214	-0.86765	q1	52	1.92308
htp-1	0.272658	-0.819265	q1	52	1.92308
aptf-3	-0.182883	-0.451048	q3	22	4.54545
zyg-11	0.256727	-0.808972	q1	52	1.92308
tsen-2	0.331586	0.752404	q2	34	2.94118
bcs-1	0.220149	2.28601	q2	34	2.94118
C14B9.8	-0.209789	-0.63226	q3	22	4.54545
rpn-3	0.122128	-0.705582	q1	52	1.92308
F59G1.8	0.252762	-0.489889	q1	52	1.92308
npp-2	0.18771	0.736858	q2	34	2.94118
spg-7	-0.252011	0.979339	q4	11	9.09091
slc-30A5	-0.155651	-0.452859	q3	22	4.54545
bub-1	0.158666	-0.410958	q1	52	1.92308
hmgs-1	0.266796	-0.805926	q1	52	1.92308
ngp-1	0.143542	0.448945	q2	34	2.94118
Y59E9AL.36	0.194021	-0.508229	q1	52	1.92308
lst-6	-0.291069	-0.553152	q3	22	4.54545
C27F2.7	0.231849	0.425437	q2	34	2.94118
knl-3	0.198267	-0.658273	q1	52	1.92308

## Sheet: CSR.sy441.30mHS.sy441.Ctrl
genes	Log2FoldChage.mRNA	Log2FoldChage.22G.RNA	quadrant	quadrant.2	percent.label
atl-1	-0.423182	-0.489522	q3	32	3.125
hsp-90	0.350717	-0.732023	q1	250	0.4
sco-1	0.417424	-1.34413	q1	250	0.4
pam-1	0.283565	-0.857877	q1	250	0.4
gsy-1	0.372525	-1.04911	q1	250	0.4
lars-1	0.355556	-0.859394	q1	250	0.4
cct-2	0.319126	-1.14806	q1	250	0.4
Y57A10A.5	0.482165	0.340076	q2	17	5.88235
Y111B2A.12	0.559091	-0.997612	q1	250	0.4
acly-2	0.42748	-1.1129	q1	250	0.4
Y67D8C.9	-1.14422	-0.506958	q3	32	3.125
fdps-1	-0.310246	-0.740196	q3	32	3.125
cct-1	0.320956	-0.627202	q1	250	0.4
eef-1G	0.242133	-1.34782	q1	250	0.4
Y37E11B.5	0.583489	-0.792412	q1	250	0.4
C07D8.6	0.276065	-0.587259	q1	250	0.4
sdha-2	0.369083	-0.729787	q1	250	0.4
sars-1	0.241644	-0.771153	q1	250	0.4
set-31	-0.465638	-0.821928	q3	32	3.125
gpr-2	-0.389097	-0.758042	q3	32	3.125
gsr-1	0.300434	-1.02105	q1	250	0.4
cpsf-4	0.257656	-0.304786	q1	250	0.4
cyc-1	0.171429	-0.747337	q1	250	0.4
abce-1	0.28247	-0.909689	q1	250	0.4
gpr-1	-0.455208	-0.429234	q3	32	3.125
rps-7	0.221662	-0.449044	q1	250	0.4
fkb-6	0.29573	-0.782755	q1	250	0.4
ints-3	0.644632	-0.719426	q1	250	0.4
fbf-2	0.487892	-0.73948	q1	250	0.4
dpt-1	0.223207	-0.528136	q1	250	0.4
Y45F10D.7	0.467753	-1.13406	q1	250	0.4
eef-1A.1	0.349151	-0.583111	q1	250	0.4
tba-2	0.305214	-0.606681	q1	250	0.4
T28F4.1	-0.614909	-0.844735	q3	32	3.125
rpt-2	0.257205	-1.32779	q1	250	0.4
elof-1	-0.331867	-1.36033	q3	32	3.125
hsp-110	0.394765	-0.691843	q1	250	0.4
rpt-1	0.323304	-0.469025	q1	250	0.4
enol-1	0.279611	-0.638072	q1	250	0.4
dpf-5	0.352857	-0.880304	q1	250	0.4
tars-1	0.397682	-0.646604	q1	250	0.4
Y92H12BR.3	0.241427	-0.938044	q1	250	0.4
rpl-13	0.254294	-0.721006	q1	250	0.4
acly-1	0.593164	-0.5584	q1	250	0.4
Y54E10A.10	0.299468	0.264792	q2	17	5.88235
rpn-10	0.221466	-1.40282	q1	250	0.4
usp-5	0.378106	-0.465714	q1	250	0.4
nol-6	0.570121	-1.1918	q1	250	0.4
xpd-1	0.402537	-1.22784	q1	250	0.4
eftu-2	0.228896	-0.985557	q1	250	0.4
egg-3	0.309064	-0.864706	q1	250	0.4
lep-2	0.527504	-0.524803	q1	250	0.4
aars-2	0.277995	-0.748959	q1	250	0.4
spas-1	0.248001	-0.841714	q1	250	0.4
ego-1	0.38939	-0.782075	q1	250	0.4
cox-18	0.370199	-0.559552	q1	250	0.4
glp-4	0.248116	-0.995133	q1	250	0.4
mep-1	-0.281574	1.07507	q4	3	33.3333
iars-1	0.244168	-0.562397	q1	250	0.4
rpn-5	0.231096	-0.644274	q1	250	0.4
sup-17	0.227172	-0.451902	q1	250	0.4
icd-2	0.172695	-0.583478	q1	250	0.4
usp-39	0.247609	0.625384	q2	17	5.88235
hsp-4	0.302615	-0.874417	q1	250	0.4
cct-4	0.219512	-0.83146	q1	250	0.4
eif-3.D	0.256081	-0.695475	q1	250	0.4
T22D1.3	0.195017	-1.58408	q1	250	0.4
toe-1	0.345476	-1.20875	q1	250	0.4
bub-3	0.224235	-1.06793	q1	250	0.4
pbs-6	0.302747	-1.6476	q1	250	0.4
C14C11.2	0.311159	-0.535102	q1	250	0.4
nifk-1	0.233655	-1.26467	q1	250	0.4
F13B12.1	0.200355	-1.79921	q1	250	0.4
ima-2	0.292527	-0.911786	q1	250	0.4
C28H8.3	0.373687	-1.02643	q1	250	0.4
M142.5	0.315709	-0.986391	q1	250	0.4
cdc-48.2	0.369397	-0.606934	q1	250	0.4
F26G5.1	0.437613	-0.492387	q1	250	0.4
cogc-1	0.406357	-1.0561	q1	250	0.4
R02F2.7	0.411629	-1.45882	q1	250	0.4
eif-2gamma	0.320742	-0.759017	q1	250	0.4
let-611	0.224608	-1.31645	q1	250	0.4
Y38E10A.22	0.389035	-0.804723	q1	250	0.4
H05C05.1	0.522048	-1.21209	q1	250	0.4
M106.3	0.251065	-1.11644	q1	250	0.4
mage-1	0.255414	-0.533838	q1	250	0.4
rha-2	0.506376	-0.519864	q1	250	0.4
paa-1	0.210124	-0.978903	q1	250	0.4
tbb-2	0.360761	-0.781967	q1	250	0.4
pbs-2	0.231019	-1.33083	q1	250	0.4
tba-1	0.31495	-0.861519	q1	250	0.4
smc-3	0.300968	-0.906353	q1	250	0.4
usp-50	0.373147	-1.98863	q1	250	0.4
cul-5	-0.17266	-0.649293	q3	32	3.125
xnd-1	0.392284	-0.789219	q1	250	0.4
hars-1	0.230489	-0.368715	q1	250	0.4
nmy-2	0.396287	-0.909054	q1	250	0.4
rpt-4	0.195656	-0.79093	q1	250	0.4
trr-1	0.661669	-0.484342	q1	250	0.4
rpb-2	0.206145	-0.990792	q1	250	0.4
plrg-1	0.231441	-0.585991	q1	250	0.4
spt-5	0.353494	-0.662901	q1	250	0.4
Y116A8C.27	0.324711	-0.946995	q1	250	0.4
ZC262.7	1.65036	-0.658089	q1	250	0.4
mcrs-1	0.311486	-0.678393	q1	250	0.4
K02F3.2	0.383005	-0.791519	q1	250	0.4
copg-1	0.194923	-0.944195	q1	250	0.4
erfa-3	0.164598	-0.515746	q1	250	0.4
let-60	-0.212148	-0.518908	q3	32	3.125
Y46E12BL.2	0.574012	-1.08071	q1	250	0.4
dnj-19	0.150608	-1.31401	q1	250	0.4
ears-1	0.425194	-2.05604	q1	250	0.4
cct-7	0.349816	0.355772	q2	17	5.88235
gpi-1	0.222043	-0.84047	q1	250	0.4
htp-1	-0.332606	-0.432507	q3	32	3.125
wago-1	0.290853	-0.935311	q1	250	0.4
mdt-17	0.302612	-0.993032	q1	250	0.4
pfs-2	0.42328	-0.981373	q1	250	0.4
M116.5	0.373804	0.333183	q2	17	5.88235
Y75B8A.25	0.364083	-1.11334	q1	250	0.4
gmpr-1	0.176144	-0.63059	q1	250	0.4
sut-2	0.405755	-0.695739	q1	250	0.4
prp-21	0.206731	0.795652	q2	17	5.88235
Y41E3.1	0.222059	-0.989123	q1	250	0.4
cdc-73	0.34733	-0.557013	q1	250	0.4
egl-45	0.330134	-0.66704	q1	250	0.4
Y47G6A.18	0.421293	-0.716847	q1	250	0.4
cul-3	0.164385	-1.07571	q1	250	0.4
rps-3	0.172653	-0.343394	q1	250	0.4
pro-3	0.401265	-0.811731	q1	250	0.4
klp-16	-0.247954	-0.687745	q3	32	3.125
imb-1	0.280896	-0.479998	q1	250	0.4
cyl-1	0.192405	-0.736191	q1	250	0.4
pie-1	0.422956	-0.651182	q1	250	0.4
R04D3.3	0.264785	-1.37351	q1	250	0.4
Y69A2AR.1	0.422399	-0.564484	q1	250	0.4
gcn-1	0.744678	-0.816298	q1	250	0.4
rsy-1	0.206552	0.753113	q2	17	5.88235
tcc-1	0.351939	-0.654479	q1	250	0.4
fln-1	0.426518	-0.539373	q1	250	0.4
rpn-3	0.150364	-1.10941	q1	250	0.4
rpn-7	0.176646	-0.62534	q1	250	0.4
ari-2	-0.241472	-0.834357	q3	32	3.125
dcap-1	0.246519	-1.1157	q1	250	0.4
ZK858.6	0.163793	-0.378668	q1	250	0.4
rpoa-1	0.558982	-1.04405	q1	250	0.4
C05C10.2	0.352003	-0.696728	q1	250	0.4
npp-13	0.287588	-1.0551	q1	250	0.4
try-1	0.233445	-0.507833	q1	250	0.4
F33E11.2	0.282978	-0.884171	q1	250	0.4
zwl-1	0.25747	-0.745338	q1	250	0.4
ufd-2	-0.167791	0.637073	q4	3	33.3333
cya-1	-0.202353	-0.444375	q3	32	3.125
dyci-1	0.205002	-0.808638	q1	250	0.4
H20J04.4	0.355918	-0.50076	q1	250	0.4
F31F6.2	0.396288	-0.756519	q1	250	0.4
ard-1	0.320728	-0.521209	q1	250	0.4
ife-3	0.231748	-0.70924	q1	250	0.4
H04D03.2	0.36187	-0.695887	q1	250	0.4
pas-6	0.187958	-1.07014	q1	250	0.4
plin-1	0.219573	-1.08683	q1	250	0.4
Y48C3A.14	0.236811	-1.02663	q1	250	0.4
F53F8.5	0.289172	-0.551545	q1	250	0.4
trip-4	0.238816	-0.835208	q1	250	0.4
copa-1	0.278769	-1.19765	q1	250	0.4
Y54G9A.7	0.293237	-1.01365	q1	250	0.4
rbm-3.1	-0.352219	-0.479294	q3	32	3.125
T24D1.3	0.346913	-1.01582	q1	250	0.4
F44E7.4	0.285005	-0.524106	q1	250	0.4
pars-1	0.202985	0.822899	q2	17	5.88235
mip-2	0.224249	-0.356378	q1	250	0.4
dsb-3	-0.30648	-1.15831	q3	32	3.125
rpn-12	0.196901	-0.870188	q1	250	0.4
ZK1127.5	-0.312564	-0.76497	q3	32	3.125
rpl-5	0.318283	-0.773496	q1	250	0.4
klp-15	-0.236425	-1.66666	q3	32	3.125
dnj-29	0.176733	-0.659076	q1	250	0.4
taf-4	0.211489	-0.944384	q1	250	0.4
alkb-1	0.213366	-0.848429	q1	250	0.4
rpn-11	0.186461	-1.71929	q1	250	0.4
H04M03.3	0.310832	-1.40261	q1	250	0.4
rpoa-12	-0.367992	-0.96602	q3	32	3.125
itsn-1	0.25212	-0.856601	q1	250	0.4
R02F2.4	0.226995	0.490052	q2	17	5.88235
gpd-4	0.217022	0.530321	q2	17	5.88235
cdc-48.1	0.311003	-0.499707	q1	250	0.4
hal-3	0.266628	-0.432448	q1	250	0.4
K04C2.2	0.211987	-0.779035	q1	250	0.4
aatf-1	0.288461	-0.709061	q1	250	0.4
sip-1	0.303344	-0.867512	q1	250	0.4
snpc-3.1	-0.356678	-0.994689	q3	32	3.125
snu-13	-0.170017	-0.652395	q3	32	3.125
nmt-1	0.157085	-0.475119	q1	250	0.4
pid-3	0.201636	-0.500198	q1	250	0.4
nepr-1	-0.309862	-0.510607	q3	32	3.125
F59E12.1	0.267641	-0.719257	q1	250	0.4
rpl-9	0.186294	-1.47227	q1	250	0.4
hsp-1	0.418308	-1.07749	q1	250	0.4
tofu-5	0.207911	-1.67583	q1	250	0.4
abcf-2	0.131154	-0.803177	q1	250	0.4
acdh-3	0.222842	0.674672	q2	17	5.88235
pacs-1	-0.151423	-0.484895	q3	32	3.125
spt-16	0.297061	-0.642924	q1	250	0.4
npp-21	0.438067	-1.3471	q1	250	0.4
algn-8	0.212041	-0.670047	q1	250	0.4
sql-1	0.360608	-0.934271	q1	250	0.4
rnr-1	0.341253	-0.637578	q1	250	0.4
rpl-35	0.170976	-0.890094	q1	250	0.4
alx-1	0.377346	-0.748055	q1	250	0.4
C35D10.7	-0.198025	0.960025	q4	3	33.3333
pbs-1	0.199894	-1.01517	q1	250	0.4
mars-1	0.196975	-1.16776	q1	250	0.4
pck-2	0.225938	-0.469398	q1	250	0.4
pgl-3	0.241205	-1.11134	q1	250	0.4
sep-1	0.357934	0.778329	q2	17	5.88235
ran-3	0.265361	-0.66729	q1	250	0.4
kin-10	0.133856	-0.748354	q1	250	0.4
mdh-2	0.215417	-0.73328	q1	250	0.4
sart-3	0.183212	-0.692345	q1	250	0.4
jamp-1	-0.180869	-0.626151	q3	32	3.125
K07F5.14	-0.215299	-0.594478	q3	32	3.125
dap-3	0.163674	-0.838903	q1	250	0.4
cpg-4	0.263205	-0.248502	q1	250	0.4
abcf-3	0.190987	-0.441757	q1	250	0.4
pfn-1	0.175846	-0.759179	q1	250	0.4
ddx-27	0.312616	-0.652006	q1	250	0.4
glh-3	0.176396	-0.46576	q1	250	0.4
unc-85	-0.287078	-0.707074	q3	32	3.125
adr-1	0.495292	-0.843353	q1	250	0.4
ubc-13	0.184549	-0.845325	q1	250	0.4
rml-1	0.168781	-0.951393	q1	250	0.4
mcm-5	0.181321	-1.41227	q1	250	0.4
dnpp-1	0.178439	0.774618	q2	17	5.88235
ldp-1	0.271058	-0.665863	q1	250	0.4
F56A11.5	0.206779	-0.608455	q1	250	0.4
B0205.1	0.171821	-1.93643	q1	250	0.4
adss-1	0.24642	-1.41733	q1	250	0.4
Y66D12A.16	0.363444	-0.790323	q1	250	0.4
F18C12.3	-0.24814	-1.13524	q3	32	3.125
F55F10.1	0.585223	-0.91876	q1	250	0.4
W05F2.3	0.311134	-0.594739	q1	250	0.4
C09G4.4	-0.234324	-0.699903	q3	32	3.125
kars-1	0.160062	-0.623221	q1	250	0.4
mrpl-34	0.292644	-0.723182	q1	250	0.4
pyr-1	0.345466	-0.754749	q1	250	0.4
smg-9	0.464575	-1.71445	q1	250	0.4
tsn-1	0.311275	-0.87647	q1	250	0.4
C02B10.4	0.182983	-0.479234	q1	250	0.4
rod-1	0.359572	-1.30834	q1	250	0.4
gla-3	0.406468	-0.538207	q1	250	0.4
gfat-2	0.214661	-0.794058	q1	250	0.4
nra-4	0.178888	-0.588098	q1	250	0.4
kin-18	0.317131	-1.01025	q1	250	0.4
uad-2	0.232753	-1.17676	q1	250	0.4
sphk-1	-0.286463	-0.601327	q3	32	3.125
F52B11.2	0.230279	-0.754057	q1	250	0.4
pos-1	0.214997	-0.786039	q1	250	0.4
fnta-1	0.217119	-0.724287	q1	250	0.4
rpc-2	0.222826	-0.990203	q1	250	0.4
T23H2.3	0.380653	-0.285816	q1	250	0.4
ufd-1	0.187989	-0.736287	q1	250	0.4
sec-23	0.35384	-1.14845	q1	250	0.4
unc-26	0.44598	-0.431753	q1	250	0.4
rpt-3	0.190685	-0.373429	q1	250	0.4
ufd-3	0.178559	-0.98622	q1	250	0.4
Y53F4B.21	0.585041	-0.684939	q1	250	0.4
F02E8.4	0.240659	-0.764386	q1	250	0.4
tofu-6	0.214937	-0.688377	q1	250	0.4
ptc-1	0.326076	-0.770562	q1	250	0.4
lsy-13	0.149518	-1.29025	q1	250	0.4
oxi-1	0.200926	-0.717992	q1	250	0.4
ddx-10	0.226986	0.351922	q2	17	5.88235
mog-5	0.200159	-1.20426	q1	250	0.4
viln-1	0.267176	-0.823647	q1	250	0.4
apx-1	0.299391	-0.624598	q1	250	0.4
rpn-2	0.315311	-0.609718	q1	250	0.4
dut-1	0.182442	-1.49922	q1	250	0.4
imph-1	0.428637	-0.4946	q1	250	0.4
inos-1	0.195152	0.719669	q2	17	5.88235
let-858	0.376323	-0.791159	q1	250	0.4
tag-335	-0.226626	-0.705217	q3	32	3.125
dhc-1	0.447313	-1.61705	q1	250	0.4
set-32	0.325885	-0.564977	q1	250	0.4
C46A5.6	-0.200706	-0.478628	q3	32	3.125
sftb-2	0.179366	-1.12029	q1	250	0.4
eif-3.G	0.153934	-0.47408	q1	250	0.4
cdk-12	0.427137	-0.729484	q1	250	0.4
stip-1	0.156818	-0.584993	q1	250	0.4
spg-7	0.251103	1.69012	q2	17	5.88235
atg-3	0.219072	-0.770789	q1	250	0.4
rpn-1	0.289931	-0.344534	q1	250	0.4
C27B7.5	0.180287	-0.31302	q1	250	0.4
pole-1	0.466389	-0.49653	q1	250	0.4
clpf-1	0.378521	1.01349	q2	17	5.88235
sap-140	0.200454	-0.584032	q1	250	0.4
prp-6	0.176167	-0.749571	q1	250	0.4
eif-3.C	0.186101	-0.480652	q1	250	0.4
tag-72	0.161551	-1.36307	q1	250	0.4
Y57A10A.8	0.25849	-0.639568	q1	250	0.4
suds-3	0.200834	-0.537617	q1	250	0.4
csn-6	0.294238	-1.4556	q1	250	0.4
F59G1.8	-0.247151	-0.968875	q3	32	3.125

## Sheet: CSR.sy441.5mHS.sy441.Ctrl
genes	Log2FoldChage.mRNA	Log2FoldChage.22G.RNA	quadrant	quadrant.2	percent.label
glh-1	-0.224135	-0.191558	q3	5	20
snpc-3.1	-0.434146	-0.88861	q3	5	20
set-31	-0.346806	-0.881942	q3	5	20
klp-16	-0.263624	-0.455221	q3	5	20
klp-15	-0.251492	-0.733048	q3	5	20

## Sheet: CSR.sy441.REC.sy441.Ctrl
genes	Log2FoldChage.mRNA	Log2FoldChage.22G.RNA	quadrant	quadrant.2	percent.label
C16A11.4	0.908071	-0.611236	q1	40	2.5
Y17G7B.21	0.68708	-0.574144	q1	40	2.5
M01H9.3	0.703871	-0.411056	q1	40	2.5
C16A11.3	0.996041	-0.542588	q1	40	2.5
gpdh-2	0.653604	-0.963246	q1	40	2.5
nurf-1	0.593748	-0.824747	q1	40	2.5
snpc-3.1	0.707645	-0.882733	q1	40	2.5
Y17G7B.20	0.637609	-0.591874	q1	40	2.5
rpa-2	0.258747	-0.93306	q1	40	2.5
cin-4	-0.695968	-1.14129	q3	22	4.54545
ppw-1	-0.316705	-1.02568	q3	22	4.54545
coq-1	-0.453101	-0.425424	q3	22	4.54545
elof-1	0.359935	-0.466625	q1	40	2.5
tat-3	-0.62285	-0.380217	q3	22	4.54545
C16C8.5	0.581629	-1.05918	q1	40	2.5
C27F2.7	0.411017	-0.739871	q1	40	2.5
ego-1	-0.450764	-0.443004	q3	22	4.54545
Y119D3B.12	-0.301709	-0.709909	q3	22	4.54545
jamp-1	0.249239	-0.677775	q1	40	2.5
Y53C12A.6	-0.967048	-1.24046	q3	22	4.54545
nxf-1	0.389757	-1.18675	q1	40	2.5
H31G24.3	-0.491269	-0.449237	q3	22	4.54545
C01G6.3	0.445512	-1.32763	q1	40	2.5
gpr-2	0.313347	-1.34657	q1	40	2.5
his-72	0.277719	-1.03468	q1	40	2.5
vps-60	0.190703	0.547886	q2	6	16.6667
bec-1	0.383285	-0.769758	q1	40	2.5
F59G1.8	0.332698	-0.179182	q1	40	2.5
unc-85	0.345988	-0.570163	q1	40	2.5
alh-3	-0.2551	-0.451417	q3	22	4.54545
dohh-1	0.302494	-0.404949	q1	40	2.5
coh-4	-0.408578	-0.50996	q3	22	4.54545
ZK673.2	0.214468	-0.524804	q1	40	2.5
viln-1	-0.321397	-0.628564	q3	22	4.54545
ttc-37	-0.306926	-1.19535	q3	22	4.54545
klp-16	0.233014	-0.935629	q1	40	2.5
ksr-2	0.33703	0.319937	q2	6	16.6667
ret-1	-0.180529	-0.483079	q3	22	4.54545
snpc-3.2	0.493335	-0.536084	q1	40	2.5
ain-2	0.222221	-0.98294	q1	40	2.5
hsp-60	-0.287138	-0.408008	q3	22	4.54545
gtap-2	0.223953	-0.636077	q1	40	2.5
cls-2	0.485112	-0.656165	q1	40	2.5
Y48G10A.2	0.280166	-0.479999	q1	40	2.5
F25H2.12	0.194675	-0.930282	q1	40	2.5
lin-61	0.231296	0.367594	q2	6	16.6667
wapl-1	0.213739	0.640875	q2	6	16.6667
vps-54	-0.173223	0.266298	q4	3	33.3333
paqr-2	-0.193098	0.647774	q4	3	33.3333
letm-1	0.176128	-0.991828	q1	40	2.5
cec-10	-0.249245	0.568942	q4	3	33.3333
tasp-1	0.173056	-0.716193	q1	40	2.5
enol-1	-0.181075	-0.532474	q3	22	4.54545
F58B3.6	0.189666	-1.20944	q1	40	2.5
C24H12.4	0.213703	-1.04587	q1	40	2.5
ubq-1	0.244722	-1.14311	q1	40	2.5
klp-15	0.203955	-1.20577	q1	40	2.5
pam-1	-0.136185	-0.644381	q3	22	4.54545
T20B12.3	0.216896	-0.716786	q1	40	2.5
T08D2.8	-0.55868	-0.715331	q3	22	4.54545
spg-7	-0.247956	-1.14582	q3	22	4.54545
T20F5.7	0.148705	-0.937694	q1	40	2.5
T26A8.4	0.263854	0.438196	q2	6	16.6667
pfn-1	0.155587	-0.420069	q1	40	2.5
rpoa-12	0.307976	-0.738512	q1	40	2.5
pdxk-1	-0.209016	-0.725933	q3	22	4.54545
lpin-1	0.233303	-0.913234	q1	40	2.5
F26A3.1	0.269333	0.554288	q2	6	16.6667
dnpp-1	-0.156631	-0.860811	q3	22	4.54545
hxk-3	-0.230778	-0.677614	q3	22	4.54545
clu-1	-0.312554	-0.461659	q3	22	4.54545

## Sheet: unclass.N2.30mHS.N2.Ctrl
genes	Log2FoldChage.mRNA	Log2FoldChage.22G.RNA	quadrant	quadrant.2	percent.label
hsp-16.11	8.78651	0.729357	q2	213	0.469484
F44E5.5	11.3428	1.52783	q2	213	0.469484
F44E5.4	11.5817	1.16495	q2	213	0.469484
mans-2	-1.04152	0.442281	q4	128	0.78125
his-41	1.02397	0.88347	q2	213	0.469484
C01B4.6	-20.3596	0.656747	q4	128	0.78125
hsp-16.1	11.8054	2.35253	q2	213	0.469484
hsp-16.48	9.31807	0.466135	q2	213	0.469484
vglu-2	-1.06902	0.773987	q4	128	0.78125
Y38H6C.8	3.75488	0.77973	q2	213	0.469484
elo-6	-0.976441	0.761734	q4	128	0.78125
oat-1	-1.33789	1.01085	q4	128	0.78125
B0361.9	-0.841833	0.80054	q4	128	0.78125
Y19D10A.16	24.1628	2.0175	q2	213	0.469484
cav-1	-1.43017	0.978436	q4	128	0.78125
hsp-16.49	7.70425	0.229366	q2	213	0.469484
madd-4	-1.24389	0.767262	q4	128	0.78125
gasr-8	2.36763	1.17019	q2	213	0.469484
nrf-6	-0.684565	0.618779	q4	128	0.78125
sdz-4	-2.03516	0.733955	q4	128	0.78125
B0281.5	-1.20752	0.696101	q4	128	0.78125
Y92H12BR.7	0.62957	0.747429	q2	213	0.469484
eva-1	-1.60867	1.38881	q4	128	0.78125
F10G7.9	0.396821	0.603983	q2	213	0.469484
ooc-3	0.300338	2.20157	q2	213	0.469484
cif-1	0.241582	1.25011	q2	213	0.469484
C50F4.6	0.690478	1.74223	q2	213	0.469484
sipa-1	-0.753697	0.675116	q4	128	0.78125
fbxb-83	-2.61015	0.776447	q4	128	0.78125
hex-2	-1.03913	0.981734	q4	128	0.78125
cutl-15	-1.91577	0.931595	q4	128	0.78125
cars-1	0.292885	2.05684	q2	213	0.469484
rps-4	0.311193	0.84068	q2	213	0.469484
Y17D7C.2	6.46887	1.82105	q2	213	0.469484
fbxb-105	-2.5697	1.82422	q4	128	0.78125
hir-1	-0.656454	1.27606	q4	128	0.78125
F39G3.3	0.649256	1.27606	q2	213	0.469484
mtk-1	0.436905	0.335083	q2	213	0.469484
pdi-1	0.321138	0.823315	q2	213	0.469484
nep-22	-0.638784	1.08795	q4	128	0.78125
aakg-3	-1.46498	0.842651	q4	128	0.78125
ekl-1	0.368415	1.24869	q2	213	0.469484
F56A8.8	-1.14813	2.09122	q4	128	0.78125
hrpl-1	0.34373	1.45426	q2	213	0.469484
dct-16	-0.600217	0.616544	q4	128	0.78125
pes-2.1	-2.31611	0.706824	q4	128	0.78125
hex-3	0.406422	0.947282	q2	213	0.469484
plx-2	-1.4117	0.544629	q4	128	0.78125
snt-4	-0.723624	0.753806	q4	128	0.78125
fbxb-63	-2.39046	0.747657	q4	128	0.78125
itr-1	-0.576145	-0.38868	q3	9	11.1111
ZK1193.2	-0.425647	0.93447	q4	128	0.78125
W01C8.5	-0.8037	0.622617	q4	128	0.78125
wars-1	0.558336	0.677162	q2	213	0.469484
gfm-1	0.375176	0.902898	q2	213	0.469484
F25B5.5	0.451979	1.51382	q2	213	0.469484
Y65A5A.1	-2.07595	0.795505	q4	128	0.78125
F57G12.1	-0.808883	1.39366	q4	128	0.78125
fbxb-108	-2.92009	1.71714	q4	128	0.78125
gpcp-2	0.289487	0.834641	q2	213	0.469484
fbxb-90	-2.07671	0.505827	q4	128	0.78125
unc-45	0.354866	0.785871	q2	213	0.469484
dars-1	0.224001	0.91508	q2	213	0.469484
fbxc-26	-2.94595	1.47789	q4	128	0.78125
uba-2	0.247821	0.875105	q2	213	0.469484
R193.2	-0.998843	0.903927	q4	128	0.78125
nol-9	0.488179	1.21512	q2	213	0.469484
tiar-1	0.330891	0.382753	q2	213	0.469484
sly-1	0.322315	0.749923	q2	213	0.469484
clh-6	0.333298	0.33343	q2	213	0.469484
pqn-52	0.188743	1.34432	q2	213	0.469484
pes-2.2	-1.21207	1.27195	q4	128	0.78125
fbxb-119	-1.88499	-0.974869	q3	9	11.1111
tag-180	-1.12445	1.11978	q4	128	0.78125
hnd-1	-1.53424	1.04706	q4	128	0.78125
C35E7.3	-1.10614	1.05275	q4	128	0.78125
nhr-14	-0.732063	0.784405	q4	128	0.78125
pal-1	0.233049	-1.29301	q1	8	12.5
fbxb-81	-2.97563	-0.650481	q3	9	11.1111
tbc-6	-0.630627	-0.907287	q3	9	11.1111
gei-1	-0.929657	-0.412644	q3	9	11.1111
W04A8.4	-1.29197	0.746451	q4	128	0.78125
fbxb-17	-1.53202	-0.762523	q3	9	11.1111
ptr-13	-0.54983	0.949383	q4	128	0.78125
R11E3.2	-0.889024	0.186511	q4	128	0.78125
trpp-10	0.572692	0.356945	q2	213	0.469484
mccc-1	0.237314	1.02379	q2	213	0.469484
fbxc-25	-2.23347	2.00606	q4	128	0.78125
skr-7	-0.811848	0.755616	q4	128	0.78125
mcm-2	0.359326	1.23003	q2	213	0.469484
fbxb-41	-1.5576	1.47924	q4	128	0.78125
Y92H12A.5	0.52112	1.16639	q2	213	0.469484
nduf-2.2	0.246761	0.878587	q2	213	0.469484
gly-3	0.198607	0.986269	q2	213	0.469484
cand-1	0.406606	0.790834	q2	213	0.469484
Y59A8B.21	0.390868	-0.490649	q1	8	12.5
cla-1	-1.45363	0.68601	q4	128	0.78125
F55H2.5	0.307404	0.568632	q2	213	0.469484
C09G9.1	0.300196	1.39065	q2	213	0.469484
ric-4	-0.708808	0.90743	q4	128	0.78125
trxr-2	0.464801	0.762211	q2	213	0.469484
Y106G6D.1	-1.16556	0.7534	q4	128	0.78125
Y39A1A.22	0.611723	1.9191	q2	213	0.469484
txdc-12.1	-0.762709	0.422355	q4	128	0.78125
scav-3	0.197259	1.50825	q2	213	0.469484
bli-4	0.311559	0.953584	q2	213	0.469484
C01G6.4	0.317759	0.859972	q2	213	0.469484
Y71F9AL.1	0.355627	0.442658	q2	213	0.469484
unc-87	0.42673	1.09225	q2	213	0.469484
R166.2	0.2913	1.02544	q2	213	0.469484
lonp-1	0.272879	0.937601	q2	213	0.469484
pigo-1	0.308021	-2.37087	q1	8	12.5
ubc-15	0.356534	0.549101	q2	213	0.469484
Y64G10A.7	-0.99355	1.45192	q4	128	0.78125
F48E8.3	0.217008	0.51854	q2	213	0.469484
ufl-1	0.212006	0.78192	q2	213	0.469484
fbxb-15	-1.47605	1.00326	q4	128	0.78125
pho-14	0.358687	2.41326	q2	213	0.469484
Y92H12BL.4	0.660344	0.675912	q2	213	0.469484
zipt-2.1	-0.602372	1.33165	q4	128	0.78125
T16G12.6	0.323811	0.929678	q2	213	0.469484
lis-1	0.471615	0.46044	q2	213	0.469484
chdh-1	0.329679	1.43494	q2	213	0.469484
wdr-23	0.260231	0.295495	q2	213	0.469484
lgc-55	-1.48745	0.865606	q4	128	0.78125
zfr-1	0.382881	0.575337	q2	213	0.469484
wdr-37	0.197543	1.19295	q2	213	0.469484
rab-33	0.26462	1.51873	q2	213	0.469484
Y57G11C.33	0.300858	0.490663	q2	213	0.469484
K02B12.2	-1.06051	0.715073	q4	128	0.78125
T04F8.2	-0.345177	0.584482	q4	128	0.78125
aap-1	0.26962	0.466555	q2	213	0.469484
lin-12	-0.777152	0.397006	q4	128	0.78125
F36H5.13	-2.55925	0.701556	q4	128	0.78125
nra-1	0.366411	1.19497	q2	213	0.469484
slcr-46.3	-0.618255	1.16424	q4	128	0.78125
F33E11.3	0.325402	0.557302	q2	213	0.469484
F58G1.2	0.343536	1.54334	q2	213	0.469484
mdt-8	0.205129	1.79064	q2	213	0.469484
F14B6.3	-1.11712	0.553845	q4	128	0.78125
C34B4.2	0.387855	1.0658	q2	213	0.469484
R03D7.2	0.408783	1.06583	q2	213	0.469484
mrg-1	0.171885	1.51082	q2	213	0.469484
cid-1	0.349821	1.39492	q2	213	0.469484
pigv-1	0.281034	1.09279	q2	213	0.469484
cccp-1	-0.572346	0.55769	q4	128	0.78125
aakg-5	0.388148	1.04993	q2	213	0.469484
pdpr-1	0.344408	2.62264	q2	213	0.469484
ndx-7	0.404407	1.47583	q2	213	0.469484
cts-1	0.18327	1.58949	q2	213	0.469484
phf-14	0.275296	0.575482	q2	213	0.469484
rop-1	0.212188	-3.00137	q1	8	12.5
fbxb-50	-2.02232	1.16834	q4	128	0.78125
pnn-1	0.162848	1.45371	q2	213	0.469484
bir-2	0.297778	1.10301	q2	213	0.469484
F14B8.6	-0.556068	0.451369	q4	128	0.78125
rps-10	0.241968	0.757381	q2	213	0.469484
eri-9	0.317604	0.355647	q2	213	0.469484
C40A11.6	-3.43094	1.07206	q4	128	0.78125
EEED8.2	-1.20929	0.723377	q4	128	0.78125
nhr-97	-0.290776	0.897809	q4	128	0.78125
ceh-91	0.399738	1.01258	q2	213	0.469484
sel-10	0.288964	0.787814	q2	213	0.469484
hrpu-2	0.266126	0.8497	q2	213	0.469484
rack-1	0.214876	0.573937	q2	213	0.469484
acy-1	-0.774099	0.884024	q4	128	0.78125
ucr-2.1	0.273265	1.42435	q2	213	0.469484
mrpl-30	0.274356	0.87197	q2	213	0.469484
Y48A5A.1	0.283374	0.76791	q2	213	0.469484
prx-10	0.262016	0.646475	q2	213	0.469484
rpl-17	0.198581	0.50423	q2	213	0.469484
F08G2.5	1.8389	1.04359	q2	213	0.469484
lmd-3	0.249855	1.16012	q2	213	0.469484
acn-1	-1.0545	-0.608563	q3	9	11.1111
daf-6	-1.77863	0.723767	q4	128	0.78125
Y49E10.18	-0.643087	0.662955	q4	128	0.78125
pxn-1	-0.46098	1.25622	q4	128	0.78125
ghi-1	-1.09967	1.35284	q4	128	0.78125
orc-2	0.194687	0.662188	q2	213	0.469484
nrde-1	0.237273	0.86014	q2	213	0.469484
F58F12.1	0.252125	0.778603	q2	213	0.469484
F43H9.3	0.251992	3.2408	q2	213	0.469484
polq-1	0.335861	2.22953	q2	213	0.469484
C17C3.15	-0.956302	2.01545	q4	128	0.78125
best-23	-1.81957	0.755686	q4	128	0.78125
ppm-1.D	0.433557	1.98963	q2	213	0.469484
seb-3	-1.40654	0.976836	q4	128	0.78125
glp-1	0.479493	0.811394	q2	213	0.469484
T28D6.6	0.212145	0.805682	q2	213	0.469484
F25H2.6	0.222101	1.02732	q2	213	0.469484
mom-4	0.252248	1.6943	q2	213	0.469484
dnj-16	0.196379	0.663436	q2	213	0.469484
slc-30A9	0.333137	1.5839	q2	213	0.469484
rgs-4	-0.861851	0.416292	q4	128	0.78125
eak-7	0.207551	0.732464	q2	213	0.469484
set-3	0.173912	0.523102	q2	213	0.469484
meg-4	0.325048	0.548212	q2	213	0.469484
F26G1.1	0.246592	1.47293	q2	213	0.469484
Y69A2AR.16	0.333729	0.70741	q2	213	0.469484
F30F8.1	0.304928	0.967067	q2	213	0.469484
fbxb-82	-1.57978	0.581482	q4	128	0.78125
EEED8.15	-0.61337	1.15839	q4	128	0.78125
rpl-4	0.331317	0.886953	q2	213	0.469484
erm-1	0.215909	1.31555	q2	213	0.469484
mppb-1	0.219625	0.872927	q2	213	0.469484
slt-1	-0.91808	0.599	q4	128	0.78125
tag-321	0.241202	0.578937	q2	213	0.469484
hipr-1	0.252526	0.844563	q2	213	0.469484
ivd-1	0.132428	1.38728	q2	213	0.469484
Y54E2A.8	0.272294	1.19209	q2	213	0.469484
ech-1.2	0.165277	0.914378	q2	213	0.469484
eif-2Bepsilon	0.335932	0.703416	q2	213	0.469484
H25P19.1	0.346189	1.31195	q2	213	0.469484
ugt-29	-0.616372	0.606643	q4	128	0.78125
nyn-2	0.327561	2.23427	q2	213	0.469484
C34C12.6	-0.878323	1.39487	q4	128	0.78125
T27F6.7	0.311856	1.95197	q2	213	0.469484
C35E7.2	-0.838621	1.31213	q4	128	0.78125
inx-14	0.232259	1.14926	q2	213	0.469484
sad-1	-0.941997	0.922556	q4	128	0.78125
C09B8.4	-0.587983	0.969593	q4	128	0.78125
tra-1	0.749523	1.22172	q2	213	0.469484
rpl-6	0.187367	1.16729	q2	213	0.469484
xpo-3	0.315855	0.672929	q2	213	0.469484
lin-24	0.187941	1.12837	q2	213	0.469484
T13F2.6	0.230985	-1.00113	q1	8	12.5
txt-2	-1.40941	0.789801	q4	128	0.78125
mdt-26	0.442842	0.800916	q2	213	0.469484
let-4	-1.12976	2.15367	q4	128	0.78125
tos-1	0.394773	2.19448	q2	213	0.469484
C25H3.11	0.464549	1.13943	q2	213	0.469484
alh-4	0.253048	0.289438	q2	213	0.469484
flad-1	0.255049	0.927202	q2	213	0.469484
nex-1	0.257686	0.331395	q2	213	0.469484
B0334.5	0.378638	-0.251545	q1	8	12.5
F28B4.3	-0.779612	0.701679	q4	128	0.78125
C46F11.4	0.229041	0.694324	q2	213	0.469484
F53E2.2	0.190417	0.858958	q2	213	0.469484
acbp-6	-1.11831	0.702792	q4	128	0.78125
ltah-1.1	0.248024	0.652956	q2	213	0.469484
frpr-19	0.485297	0.720564	q2	213	0.469484
crn-2	0.312953	1.32118	q2	213	0.469484
T06A1.5	-0.541157	1.03779	q4	128	0.78125
R03H10.11	-1.54145	0.918233	q4	128	0.78125
hsf-1	0.238816	0.986963	q2	213	0.469484
Y54F10AR.1	0.282538	1.14234	q2	213	0.469484
kdin-1	0.296653	0.935265	q2	213	0.469484
hsp-75	0.168859	0.691062	q2	213	0.469484
Y54E5B.2	0.290665	0.701952	q2	213	0.469484
hex-4	0.251352	3.3653	q2	213	0.469484
ZC487.1	-1.62631	1.23614	q4	128	0.78125
paqr-1	0.175621	0.39644	q2	213	0.469484
rnp-1	0.208963	0.782564	q2	213	0.469484
F52D2.12	0.499674	0.399622	q2	213	0.469484
lir-2	0.231908	0.821298	q2	213	0.469484
Y105E8B.9	-0.441095	0.919328	q4	128	0.78125
F53F10.2	0.183501	1.58737	q2	213	0.469484
pde-6	-0.479604	1.73792	q4	128	0.78125
fbxc-24	-1.4767	1.01647	q4	128	0.78125
dnj-8	0.209075	0.954414	q2	213	0.469484
H06H21.37	0.404414	1.70115	q2	213	0.469484
pes-4	-0.455454	2.4513	q4	128	0.78125
got-2.1	0.170005	1.92232	q2	213	0.469484
bar-1	-0.360194	1.27161	q4	128	0.78125
cest-27	-0.77538	0.604046	q4	128	0.78125
Y61A9LA.1	0.262932	0.64976	q2	213	0.469484
fkb-7	-0.747315	0.569313	q4	128	0.78125
Y37H9A.1	0.257616	1.96797	q2	213	0.469484
ZK1320.11	-0.559598	1.02404	q4	128	0.78125
pqn-51	0.163786	0.896192	q2	213	0.469484
F31D4.2	0.174328	1.44041	q2	213	0.469484
arx-2	0.149177	0.424031	q2	213	0.469484
prmt-5	0.144656	0.584825	q2	213	0.469484
gcy-35	1.40621	1.09474	q2	213	0.469484
unc-132	0.553061	0.521291	q2	213	0.469484
rpl-18	0.237353	1.09141	q2	213	0.469484
dhhc-9	-0.39	0.727159	q4	128	0.78125
fbxb-71	-1.73691	0.628849	q4	128	0.78125
tmc-1	-0.550051	0.856654	q4	128	0.78125
F53E4.1	0.18305	0.67947	q2	213	0.469484
Y105E8A.21	0.1763	0.718419	q2	213	0.469484
C43H6.6	-3.73602	0.593894	q4	128	0.78125
cpx-1	-0.667443	0.738449	q4	128	0.78125
famk-1	-0.295669	1.59736	q4	128	0.78125
C50F4.16	0.167258	1.04377	q2	213	0.469484
mter-4	0.239041	0.86424	q2	213	0.469484
ufbp-1	0.165517	0.719782	q2	213	0.469484
C50E3.5	0.189666	0.970982	q2	213	0.469484
C35B1.2	0.187813	0.8191	q2	213	0.469484
plpp-1.1	0.227175	0.786571	q2	213	0.469484
C46C11.4	-1.71368	1.86532	q4	128	0.78125
F53B3.5	-0.586386	0.605516	q4	128	0.78125
sms-1	0.165429	0.405755	q2	213	0.469484
lad-2	-0.843092	1.10436	q4	128	0.78125
fbxb-53	-1.21135	0.860572	q4	128	0.78125
drl-1	-0.360947	1.60917	q4	128	0.78125
fbxb-3	-1.15258	1.4641	q4	128	0.78125
rskd-1	0.211532	1.01737	q2	213	0.469484
cng-1	-0.839219	2.2458	q4	128	0.78125
tep-1	0.335542	1.32069	q2	213	0.469484
ben-1	0.362734	2.28576	q2	213	0.469484
F20C5.11	-0.718591	1.62332	q4	128	0.78125
Y71F9AL.25	-1.89463	0.636139	q4	128	0.78125
ttll-5	0.157359	0.890319	q2	213	0.469484
hecw-1	-1.00674	2.29042	q4	128	0.78125
fbxb-40	-1.19279	0.657368	q4	128	0.78125
cup-14	0.3031	0.829237	q2	213	0.469484
wdfy-3	0.383106	1.45992	q2	213	0.469484
sas-1	0.293825	0.780887	q2	213	0.469484
eif-2Bgamma	0.190958	1.14239	q2	213	0.469484
Y49A3A.4	-1.07805	1.3615	q4	128	0.78125
calu-2	-0.352558	0.924053	q4	128	0.78125
C34C12.2	0.221303	1.38203	q2	213	0.469484
snt-3	-0.801701	1.91871	q4	128	0.78125
Y37E11AL.3	0.321553	0.558052	q2	213	0.469484
igdb-2	0.320707	0.369854	q2	213	0.469484
eme-1	0.189855	0.687514	q2	213	0.469484
lin-45	0.259287	-0.742164	q1	8	12.5
nhr-232	-0.788799	0.48375	q4	128	0.78125
C47G2.4	0.191656	1.20889	q2	213	0.469484
nfki-1	-0.407563	1.26043	q4	128	0.78125
daf-15	0.389545	0.638804	q2	213	0.469484
pqn-80	0.454144	0.833008	q2	213	0.469484
F31D4.5	-0.782161	0.764338	q4	128	0.78125
C37C3.1	0.169204	1.27041	q2	213	0.469484
K01A11.1	-0.556283	0.545054	q4	128	0.78125
alh-11	0.284105	0.762713	q2	213	0.469484
F33D4.4	0.186293	0.360119	q2	213	0.469484
Y56A3A.22	0.196883	1.21144	q2	213	0.469484
anoh-2	-0.596577	-0.360262	q3	9	11.1111
K01D12.1	-1.74401	0.734774	q4	128	0.78125
bet-1	0.333143	0.516415	q2	213	0.469484
F18C5.10	-0.28863	0.989952	q4	128	0.78125
sel-2	0.33748	0.594586	q2	213	0.469484
rsa-1	0.147695	0.944818	q2	213	0.469484
ztf-1	0.23012	0.551341	q2	213	0.469484
cacn-1	0.158222	1.26418	q2	213	0.469484
drr-2	0.177727	0.728851	q2	213	0.469484
smgl-2	0.443682	0.691187	q2	213	0.469484
kat-1	0.18599	1.74785	q2	213	0.469484
F11D5.1	-0.512908	0.299818	q4	128	0.78125
pik-1	0.220638	0.78217	q2	213	0.469484
F26F2.7	0.303147	2.31173	q2	213	0.469484
bpl-1	0.31165	0.702131	q2	213	0.469484
ncbp-1	0.138529	1.47543	q2	213	0.469484
ints-9	0.22569	0.603268	q2	213	0.469484
Y6B3B.9	0.240949	0.962975	q2	213	0.469484
galt-1	-1.29756	0.690573	q4	128	0.78125
C15B12.1	-0.501548	1.232	q4	128	0.78125
pgs-1	0.23094	1.42438	q2	213	0.469484
H14N18.4	-0.449385	1.16729	q4	128	0.78125
Y45G12B.3	0.254167	1.02978	q2	213	0.469484
gbas-1	0.252743	-0.526847	q1	8	12.5
M106.2	0.231793	1.02475	q2	213	0.469484
tag-68	-0.635891	-0.675288	q3	9	11.1111
slc-17.4	-0.545627	0.625038	q4	128	0.78125
mtm-3	0.299962	1.09462	q2	213	0.469484
C41D11.9	0.30465	1.49691	q2	213	0.469484

[truncated: 17 more sheets: unclass.N2.5mHS.N2.Ctrl, unclass.N2.REC.N2.Ctrl, unclass.PRDE1.30mHS.PRDE1.Ctrl, unclass.PRDE1.5mHS.PRDE1.Ctrl, unclass.PRDE1.REC.PRDE1.Ctrl, unclass.sy441.30mHS.sy441.Ctrl, unclass.sy441.5mHS.sy441.Ctrl, unclass.sy441.REC.sy441.Ctrl, WAGO.N2.30mHS.N2.Ctrl, WAGO.N2.5mHS.N2.Ctrl, WAGO.N2.REC.N2.Ctrl, WAGO.PRDE1.30mHS.PRDE1.Ctrl, WAGO.PRDE1.5mHS.PRDE1.Ctrl, WAGO.PRDE1.REC.PRDE1.Ctrl, WAGO.sy441.30mHS.sy441.Ctrl, WAGO.sy441.5mHS.sy441.Ctrl, WAGO.sy441.REC.sy441.Ctrl]
