# Supplementary material
Source: Research Square preprint supplement (doi:10.21203/rs.3.rs-7966420/v1)
Supplement: Supplementary file 6 [file 810ef30d4316b51d05a0d216.xlsx]

## Sheet: N2_30mHSvsN2_Ctrl
Feature List

## Sheet: N2_30min_RecvsN2_Ctrl
Feature List

## Sheet: N2_5mHSvsN2_Ctrl
Feature List

## Sheet: PRDE1_30mHSvsPRDE1_Ctrl
Feature List

## Sheet: PRDE1_30min_RecvsPRDE1_Ctrl
Feature List

## Sheet: PRDE1_5mHSvsPRDE1_Ctrl
Feature List

## Sheet: sy441_30mHSvssy441_Ctrl
Feature List

## Sheet: sy441_30min_Recvssy441_Ctrl
Feature List

## Sheet: sy441_5mHSvssy441_Ctrl
Feature List
