# Supplementary material
Source: Research Square preprint supplement (doi:10.21203/rs.3.rs-7966420/v1)
Supplement: Supplementary file 7 [file b05238b6302821e4ad102c98.xlsx]

## Sheet: N2_30min_HS-N2_Ctrl
gene	transcript	dPSI	pval
WBGene00000008	F54D12.3.1	0	0.0774226
WBGene00000009	F28F9.4.1	0	0.0949051
WBGene00000023	Y53C10A.9.1	0	0.0559441
WBGene00000034	T01D1.6.1	0	0.0854146
WBGene00000038	Y48B6A.7.1	0	0.0719281
WBGene00000043	K11G12.7.1	0	0.0464535
WBGene00000046	T09A5.3.1	0	0.048951
WBGene00000047	ZC504.2.1	1	0
WBGene00000047	ZC504.2.2	-1	0
WBGene00000048	C40C9.2.1	0	0.0789211
WBGene00000049	R02E12.8.1	0	0.0554446
WBGene00000058	C31H5.3a.1	0.333333	0.0594406
WBGene00000058	C31H5.3b.1	-0.333333	0.0594406
WBGene00000059	R06A4.10a.1	0.144561	0.0719281
WBGene00000059	R06A4.10b.1	-0.373915	0.0719281
WBGene00000059	R06A4.10c.1	0.229355	0.0719281
WBGene00000060	F27B3.2a.1	0	0.0829171
WBGene00000060	F27B3.2b.1	0	0.0829171
WBGene00000060	F27B3.2c.1	0.333333	0.0829171
WBGene00000060	F27B3.2d.1	-0.333333	0.0829171
WBGene00000061	F48E3.7.1	0	0.0704296
WBGene00000062	F59B1.9a.1	-0.333333	0.043956
WBGene00000062	F59B1.9b.1	0.333333	0.043956
WBGene00000065	T04C12.4.1	0.0411554	0.0591908
WBGene00000065	T04C12.4.2	-0.0415074	0.0591908
WBGene00000069	C10F3.3.1	0	0.0754246
WBGene00000082	C02B4.1a.1	0	0.0739261
WBGene00000082	C02B4.1b.1	0	0.0739261
WBGene00000083	F08C6.1a.1	-0.155129	0.0951548
WBGene00000083	F08C6.1b.1	0.141094	0.0951548
WBGene00000090	B0334.8a.1	-0.251537	0.002997
WBGene00000090	B0334.8b.1	0.251537	0.002997
WBGene00000093	Y62E10A.5a.1	-0.052842	0.0954046
WBGene00000093	Y62E10A.5b.1	0.052842	0.0954046
WBGene00000096	C41G7.5a.1	-0.333333	0.0729271
WBGene00000096	C41G7.5b.1	0.333333	0.0729271
WBGene00000115	F01F1.6.1	-0.0297493	0.0999001
WBGene00000115	F01F1.6.2	0.0297493	0.0999001
WBGene00000135	M195.3.1	0	0.0939061
WBGene00000139	F25C8.2a.1	-0.202858	0.0864136
WBGene00000139	F25C8.2b.1	0.202858	0.0864136
WBGene00000166	W04G3.4.1	0	0.0969031
WBGene00000170	C01G6.1a.1	0.211775	0.00224775
WBGene00000170	C01G6.1b.1	-0.215363	0.00224775
WBGene00000171	Y69E1A.7a.1	-0.333333	0.0809191
WBGene00000171	Y69E1A.7b.1	0.333333	0.0809191
WBGene00000171	Y69E1A.7c.1	0	0.0809191
WBGene00000173	C35A5.1.1	0	0.047952
WBGene00000177	K07A1.16a.2	-0.237458	0.0831668
WBGene00000177	K07A1.16b.1	0.281791	0.0831668
WBGene00000181	F01G4.2a.1	-0.049383	0.0284715
WBGene00000181	F01G4.2b.1	0.049383	0.0284715
WBGene00000193	C38D4.8.1	0	0.0819181
WBGene00000207	F02E8.1.1	-0.049187	0.033966
WBGene00000207	F02E8.1.2	0.049187	0.033966
WBGene00000213	W03G1.7a.1	0.333333	0.040959
WBGene00000213	W03G1.7b.1	-0.333333	0.040959
WBGene00000228	W04D2.1a.1	-0.155629	0.0559441
WBGene00000228	W04D2.1b.1	0.0773834	0.0679321
WBGene00000228	W04D2.1c.1	0.0782451	0.0679321
WBGene00000242	F20D12.3.1	0	0.0524476
WBGene00000244	T25F10.5.1	0	0.0774226
WBGene00000251	C09G5.6.1	0	0.0779221
WBGene00000252	F59E12.12.1	0	0.0529471
WBGene00000271	F45E12.2a.1	0.0666721	0.0649351
WBGene00000271	F45E12.2b.1	-0.0666721	0.0649351
WBGene00000277	C23H4.1.1	0.149861	0.0304695
WBGene00000277	C23H4.1.2	-0.149861	0.0304695
WBGene00000279	F54D8.4a.1	-0.212177	0.0834166
WBGene00000279	F54D8.4b.1	0.212177	0.0834166
WBGene00000280	D1022.8.1	0	0.0964036
WBGene00000287	M02B7.6a.1	-0.266815	0.0669331
WBGene00000287	M02B7.6b.1	0.266815	0.0669331
WBGene00000295	W01C8.6.1	0	0.0804196
WBGene00000295	W01C8.6.2	0	0.0804196
WBGene00000296	B0432.5a.1	0.323469	0.0644356
WBGene00000296	B0432.5b.1	-0.666667	0.0644356
WBGene00000296	B0432.5c.1	0.343198	0.0644356
WBGene00000301	T13F2.8a.1	-0.140121	0.0174825
WBGene00000301	T13F2.8b.1	0.140121	0.0174825
WBGene00000376	ZC518.3b.1	-0.0924488	0.0629371
WBGene00000376	ZC518.3e.1	0.0846676	0.0629371
WBGene00000399	R05H10.6.1	0	0.0464535
WBGene00000403	B0034.3a.1	-0.155743	0.0929071
WBGene00000403	B0034.3c.1	0.159118	0.0929071
WBGene00000416	Y41D4B.13a.1	-0.0673585	0.0779221
WBGene00000416	Y41D4B.13b.1	0.0673585	0.0779221
WBGene00000417	C48D1.2a.1	-0.0556616	0.0624376
WBGene00000417	C48D1.2b.1	0.0556616	0.0624376
WBGene00000428	F16H11.4.1	0	0.0879121
WBGene00000429	C27A12.5.1	0	0.048951
WBGene00000435	W03A3.1.1	0	0.0904096
WBGene00000439	C13G5.1.1	0.666667	0.0524476
WBGene00000439	C13G5.1.2	-0.666667	0.0524476
WBGene00000440	D1007.1.1	0	0.0809191
WBGene00000441	ZC64.3a.1	-0.253726	0.0809191
WBGene00000441	ZC64.3b.2	0.253726	0.0809191
WBGene00000447	F55B12.1.1	0	0.0819181
WBGene00000452	C33D12.1.1	0	0.0639361
WBGene00000459	F22D3.1c.1	-0.199365	0.0899101
WBGene00000459	F22D3.1p.2	0.177851	0.0899101
WBGene00000480	Y38C9A.2a.1	-0.121764	0.02997
WBGene00000480	Y38C9A.2b.1	0.121764	0.02997
WBGene00000484	F38G1.1.1	0	0.0519481
WBGene00000485	F18C12.1.1	0	0.0689311
WBGene00000487	C23H5.7.1	0	0.0599401
WBGene00000488	F26D11.10a.1	-0.666667	0.0669331
WBGene00000488	F26D11.10b.1	-0.333333	0.0669331
WBGene00000488	F26D11.10c.1	0.760648	0.0669331
WBGene00000488	F26D11.10d.1	0.239352	0.0669331
WBGene00000490	C27A7.4.1	0	0.0789211
WBGene00000492	F59C6.7a.1	0.00618475	0.0814186
WBGene00000492	F59C6.7b.1	-0.00618475	0.0814186
WBGene00000501	C48D1.3.1	0	0.0809191
WBGene00000514	F22F7.5a.1	-0.535972	0.010989
WBGene00000514	F22F7.5b	0.535972	0.010989
WBGene00000521	C15C8.2.1	0	0.0704296
WBGene00000522	C09F12.1.1	0.0887548	0.0914086
WBGene00000522	C09F12.1.2	-0.0887548	0.0914086
WBGene00000523	C01C10.1a.1	0.347705	0.0614386
WBGene00000523	C01C10.1b.1	-0.347705	0.0614386
WBGene00000525	T05A10.2.1	0	0.0879121
WBGene00000544	Y47H10A.1.1	0	0.0744256
WBGene00000546	Y77E11A.10.1	0	0.0644356
WBGene00000561	C34E10.7.1	0	0.0789211
WBGene00000593	W01B6.7.1	0	0.0784216
WBGene00000596	C15A11.5.1	0	0.0599401
WBGene00000622	F53G12.7a.1	-0.269729	0.0694306
WBGene00000622	F53G12.7b.1	0.269729	0.0694306
WBGene00000634	F26B1.4.1	0	0.0859141
WBGene00000639	ZK265.2.1	0	0.0699301
WBGene00000664	F17C8.2.1	0	0.0879121
WBGene00000689	Y42H9B.1.1	0	0.0939061
WBGene00000694	Y11D7A.11.1	0	0.0729271
WBGene00000711	C52D10.13.1	0	0.048951
WBGene00000727	F55C10.2.1	0	0.0874126
WBGene00000730	T11F9.9.1	0	0.0929071
WBGene00000745	F38B6.5a.1	0	0.0779221
WBGene00000745	F38B6.5b.1	0.158442	0.0779221
WBGene00000745	F38B6.5b.2	0.230121	0.0779221
WBGene00000745	F38B6.5b.3	-0.388563	0.0779221
WBGene00000746	F41C6.5.1	0	0.0689311
WBGene00000747	F46C8.2.1	0	0.0614386
WBGene00000753	C44C10.1.1	0	0.0989011
WBGene00000757	F15A2.1a.1	-0.0152173	0.0889111
WBGene00000757	F15A2.1b.1	0.0152173	0.0889111
WBGene00000759	E03G2.4.1	0	0.0799201
WBGene00000759	E03G2.4.2	0	0.0799201
WBGene00000760	C30F2.1.1	0	0.0769231
WBGene00000762	F57B9.4a.1	0.0995199	0.0634366
WBGene00000762	F57B9.4e.1	-0.0995199	0.0634366
WBGene00000776	T03E6.7a.1	-0.0122739	0.0944056
WBGene00000776	T03E6.7b.1	0.0122739	0.0944056
WBGene00000818	Y67H2A.6a.1	0.0829101	0.0434565
WBGene00000818	Y67H2A.6b.1	-0.0829101	0.0434565
WBGene00000841	K08E7.7a.1	0.173279	0.0834166
WBGene00000841	K08E7.7b	-0.173279	0.0834166
WBGene00000854	C07H6.8.2	-0.118179	0.0576923
WBGene00000854	C07H6.8.3	0.142939	0.0576923
WBGene00000862	K11D12.1.1	0	0.0844156
WBGene00000876	C52E4.6a.1	-0.0539217	0.0889111
WBGene00000876	C52E4.6c	0.0539217	0.0889111
WBGene00000884	D1009.2.1	0.0964006	0.0729271
WBGene00000884	D1009.2.2	-0.0964006	0.0729271
WBGene00000895	B0412.1a.1	-0.333333	0.0814186
WBGene00000895	B0412.1b.1	0.333333	0.0814186
WBGene00000902	F31F6.5.1	0	0.0684316
WBGene00000907	B0240.3a.1	-0.00995299	0.0674326
WBGene00000907	B0240.3b.1	-0.267898	0.0674326
WBGene00000907	B0240.3c	0.277851	0.0674326
WBGene00000931	C25A1.10a.1	-0.034267	0.0574426
WBGene00000931	C25A1.10b.1	0.034267	0.0574426
WBGene00000934	T23G5.5.1	0	0.0849151
WBGene00000938	C26C6.5a.1	0.0681839	0.0684316
WBGene00000938	C26C6.5b.1	-0.0681839	0.0684316
WBGene00000952	E02H4.1a.1	0.666667	0.0819181
WBGene00000952	E02H4.1b.1	0	0.0819181
WBGene00000952	E02H4.1c.1	-0.666667	0.0819181
WBGene00000953	F58G6.6a.1	0.379042	0.0639361
WBGene00000953	F58G6.6b.1	-0.379042	0.0639361
WBGene00000960	F54G8.2.1	0	0.0619381
WBGene00000962	T21E12.4a.1	-0.0549647	0.0914086
WBGene00000962	T21E12.4b.1	0.0549647	0.0914086
WBGene00000979	C10F3.2.1	0	0.0764236
WBGene00000982	T11F9.11.1	0.127788	0.046953
WBGene00000982	T11F9.11.2	-0.127788	0.046953
WBGene00000989	ZK816.5.1	0	0.0779221
WBGene00000996	F49E8.5.1	-0.0517923	0.0849151
WBGene00000996	F49E8.5.2	0.0517923	0.0849151
WBGene00001034	R74.4a.1	0.0618575	0.0839161
WBGene00001034	R74.4b.1	-0.0618575	0.0839161
WBGene00001057	F01F1.5.1	0.0460284	0.0929071
WBGene00001057	F01F1.5.2	-0.0460284	0.0929071
WBGene00001059	F44B9.1a.1	-0.423724	0.0891608
WBGene00001059	F44B9.1b.1	0.423724	0.0891608
WBGene00001070	C31H2.2.1	0	0.0559441
WBGene00001074	F30B5.1.1	0	0.0509491
WBGene00001090	F15B10.2a.1	-0.0782093	0.0789211
WBGene00001090	F15B10.2b.1	0.0782093	0.0789211
WBGene00001096	C18B12.3.1	0	0.042957
WBGene00001096	C18B12.3.2	0	0.042957
WBGene00001109	F15B9.9.1	0	0.0759241
WBGene00001133	Y48B6A.4.1	0	0.0539461
WBGene00001136	F13G3.8.1	0	0.0829171
WBGene00001152	F43H9.1a.1	0.157281	0.0494505
WBGene00001152	F43H9.1b.1	-0.157281	0.0494505
WBGene00001167	F25H5.4a.1	-0.0228177	0.0839161
WBGene00001167	F25H5.4b.1	0.0237599	0.0839161
WBGene00001172	C51E3.7a.1	-0.100394	0.0664336
WBGene00001172	C51E3.7c.1	0.100394	0.0664336
WBGene00001185	F38G1.2.1	-0.666667	0.0519481
WBGene00001185	F38G1.2.2	0.666667	0.0519481
WBGene00001211	C50H2.2a.1	0.190357	0.0694306
WBGene00001211	C50H2.2b.1	-0.190357	0.0694306
WBGene00001230	F22B5.2a.1	-0.0708301	0.0424575
WBGene00001230	F22B5.2b.1	0.0708301	0.0424575
WBGene00001232	Y74C10AR.1a.1	-0.123334	0.00899101
WBGene00001232	Y74C10AR.1b.1	0.123334	0.00899101
WBGene00001239	F56H11.4a.1	-0.0515211	0.0344655
WBGene00001239	F56H11.4b.1	0.0515211	0.0344655
WBGene00001263	K04H4.1a.1	-0.0380894	0.0889111
WBGene00001263	K04H4.1b.1	0.0380894	0.0889111
WBGene00001333	C01G8.5a.1	-0.0434969	0.0634366
WBGene00001333	C01G8.5b.1	0.0434969	0.0634366
WBGene00001334	Y105E8B.8a.1	-0.0930483	0.0859141
WBGene00001334	Y105E8B.8e.1	0.10942	0.0859141
WBGene00001373	H35N03.1.1	0	0.0749251
WBGene00001389	F15B9.3a.1	-0.143685	0.0809191
WBGene00001389	F15B9.3b.1	0.143685	0.0809191
WBGene00001396	T13F2.1a.1	-0.0449905	0.0839161
WBGene00001396	T13F2.1b.1	0.0449905	0.0839161
WBGene00001400	F56E3.4a.1	0	0.0679321
WBGene00001400	F56E3.4b.1	0	0.0679321
WBGene00001414	F43G9.6a.1	0	0.0544456
WBGene00001414	F43G9.6b.1	0	0.0544456
WBGene00001434	T14G12.4a.1	0.39716	0.0749251
WBGene00001434	T14G12.4b.1	-0.39716	0.0749251
WBGene00001461	Y48D7A.2.1	0.152595	0.0739261
WBGene00001461	Y48D7A.2.2	-0.152595	0.0739261
WBGene00001477	K08C7.5.1	0	0.0624376
WBGene00001480	H24K24.5a.1	-0.23381	0.041958
WBGene00001480	H24K24.5b.1	0.23381	0.041958
WBGene00001483	C03C11.2.1	0	0.0944056
WBGene00001496	F25H9.5a.1	-0.122282	0.0304695
WBGene00001496	F25H9.5b.1	0.122282	0.0304695
WBGene00001506	EGAP9.2.1	0	0.0634366
WBGene00001508	C10F3.6.1	0.179049	0.0724276
WBGene00001508	C10F3.6.2	-0.179049	0.0724276
WBGene00001512	ZC482.1.1	0	0.0629371
WBGene00001535	C49H3.1.1	0	0.0519481
WBGene00001541	ZC239.7.1	0	0.0799201
WBGene00001543	ZK896.8.1	0	0.0764236
WBGene00001544	C17F4.6a.1	0.538256	0.0729271
WBGene00001544	C17F4.6b.1	-0.333333	0.0729271
WBGene00001544	C17F4.6c.1	-0.204923	0.0729271
WBGene00001545	F21H7.9.1	0	0.043956
WBGene00001548	T26C12.4.1	0	0.0804196
WBGene00001551	T07D1.1a.1	0.687328	0.0784216
WBGene00001551	T07D1.1b.1	-0.333333	0.0784216
WBGene00001551	T07D1.1c.1	-0.111353	0.0784216
WBGene00001551	T07D1.1d.1	-0.242642	0.0784216
WBGene00001555	T04D3.4a.1	0.345145	0.0704296
WBGene00001555	T04D3.4b.1	0.497325	0.0704296
WBGene00001555	T04D3.4c.1	-0.84247	0.0629371
WBGene00001556	C46E1.2.1	0	0.0509491
WBGene00001557	C54E4.3.1	0	0.047952
WBGene00001564	C05E4.9a.1	0.0423453	0.0364635
WBGene00001564	C05E4.9b.1	-0.0423453	0.0364635
WBGene00001586	C09G5.1.1	0	0.0669331
WBGene00001587	C45B2.4a.1	-0.219087	0.0579421
WBGene00001587	C45B2.4b.1	-0.258628	0.0579421
WBGene00001587	C45B2.4c.1	0	0.0579421
WBGene00001587	C45B2.4d.1	0.333333	0.0579421
WBGene00001587	C45B2.4e.1	0	0.0579421
WBGene00001587	C45B2.4f.1	0	0.0579421
WBGene00001587	C45B2.4g.1	0	0.0579421
WBGene00001587	C45B2.4h.1	0	0.0579421
WBGene00001587	C45B2.4i.1	-0.188953	0.0579421
WBGene00001587	C45B2.4j.1	0	0.0579421
WBGene00001587	C45B2.4k.1	0.333333	0.0579421
WBGene00001587	C45B2.4l.1	0	0.0579421
WBGene00001587	C45B2.4m.1	0	0.0579421
WBGene00001588	F09C12.1a.1	0.47466	0.0709291
WBGene00001588	F09C12.1b.1	-0.47466	0.0709291
WBGene00001593	ZC317.3.1	0	0.0664336
WBGene00001603	K03H1.1.1	0	0.0464535
WBGene00001608	R07B1.8.1	0	0.0539461
WBGene00001612	C06E1.4.1	0	0.0484515
WBGene00001618	C43H6.9a.1	-0.0967323	0.0599401
WBGene00001618	C43H6.9a.2	0	0.0599401
WBGene00001618	C43H6.9b.1	0.0967323	0.0599401
WBGene00001630	Y39E4B.12c.1	0.111607	0.0809191
WBGene00001630	Y39E4B.12c.2	-0.167427	0.0599401
WBGene00001632	Y46H3A.6a.1	-0.103412	0.0794206
WBGene00001632	Y46H3A.6b.1	0.0327352	0.0984016
WBGene00001632	Y46H3A.6c.1	0.0706765	0.0794206
WBGene00001643	F22D6.11.1	0	0.0509491
WBGene00001664	F38E1.5.1	0	0.0784216
WBGene00001665	E02C12.5a.1	-0.0258099	0.0734266
WBGene00001665	E02C12.5b	0.0258099	0.0734266
WBGene00001674	F18G5.3.1	-0.153345	0.0979021
WBGene00001674	F18G5.3.2	0.153345	0.0979021
WBGene00001676	B0207.3.1	0	0.0779221
WBGene00001677	M04C7.1.1	0	0.0689311
WBGene00001690	R08B4.1.1	1	0
WBGene00001690	R08B4.1.2	-1	0
WBGene00001695	T18H9.1a.1	0	0.0669331
WBGene00001695	T18H9.1b.1	0.372367	0.0669331
WBGene00001695	T18H9.1c.1	-0.110351	0.0669331
WBGene00001695	T18H9.1d.1	0	0.0669331
WBGene00001695	T18H9.1f.1	0	0.0669331
WBGene00001695	T18H9.1g.1	-0.262016	0.0669331
WBGene00001700	K02E2.2.1	0	0.0609391
WBGene00001707	Y48G8AR.1a.1	-0.262679	0.0934066
WBGene00001707	Y48G8AR.1b.1	0.437188	0.0934066
WBGene00001707	Y48G8AR.1c.1	-0.174509	0.0934066
WBGene00001710	C24G6.7.1	0	0.0854146
WBGene00001711	T16G1.8.1	0	0.047952
WBGene00001723	T03D8.4a.1	0.333333	0.0694306
WBGene00001723	T03D8.4b.1	-0.666667	0.0694306
WBGene00001723	T03D8.4c.1	0.333333	0.0694306
WBGene00001725	Y65B4BR.6a.1	0.284621	0.0709291
WBGene00001725	Y65B4BR.6b.1	-0.284621	0.0709291
WBGene00001726	C56A3.1.1	0	0.0739261
WBGene00001727	T05C3.4.1	0	0.0939061
WBGene00001729	C23H5.9.1	0	0.0764236
WBGene00001745	R06A10.2a.1	0.207382	0.0534466
WBGene00001745	R06A10.2b.1	-0.207382	0.0534466
WBGene00001750	K08F4.6.1	0.205444	0.0824176
WBGene00001750	K08F4.6.2	-0.205444	0.0824176
WBGene00001753	R03D7.6a.1	-0.191488	0.027972
WBGene00001753	R03D7.6c.1	0.191488	0.027972
WBGene00001762	F37B1.3.1	0	0.0794206
WBGene00001769	ZK697.6a.1	0.640172	0.0509491
WBGene00001769	ZK697.6b.1	-0.640172	0.0509491
WBGene00001771	T28A11.11.1	0	0.0799201
WBGene00001779	Y53F4B.35.1	0	0.0774226
WBGene00001794	K04D7.3a.1	-0.0296063	0.0644356
WBGene00001794	K04D7.3b.1	0.0296063	0.0644356
WBGene00001806	ZK622.2.1	0	0.0954046
WBGene00001816	Y48G8AL.11a.1	-0.240236	0.020979
WBGene00001816	Y48G8AL.11c.1	0.238436	0.020979
WBGene00001839	ZK829.2.1	0	0.0619381
WBGene00001851	F38A6.3a.1	-0.154258	0.0569431
WBGene00001851	F38A6.3e.1	0.141874	0.0569431
WBGene00001860	F28B3.7a.1	-0.106513	0.017982
WBGene00001860	F28B3.7b.1	0.106513	0.017982
WBGene00001931	F54E12.5a.1	-0.231181	0.0681818
WBGene00001931	F54E12.5c.1	0.235601	0.0681818
WBGene00001953	C02B8.4.1	0.666667	0.0529471
WBGene00001953	C02B8.4.2	-0.666667	0.0529471
WBGene00001956	C28C12.8.1	0	0.0849151
WBGene00001978	R13H4.4b.1	-0.139027	0.0559441
WBGene00001978	R13H4.4c.1	0.145708	0.0559441
WBGene00001984	W06B11.4a.1	-0.514393	0.044955
WBGene00001984	W06B11.4b.1	0.514393	0.044955
WBGene00001987	Y39B6A.48a.1	-0.131107	0.0899101
WBGene00001987	Y39B6A.48b.1	0.131107	0.0899101
WBGene00001992	Y48B6A.9.1	0	0.0764236
WBGene00002002	K08E7.2.1	0.0638159	0.0891608
WBGene00002002	K08E7.2.2	-0.0598279	0.0891608
WBGene00002007	C15H9.6a.1	-0.0584681	0.0509491
WBGene00002007	C15H9.6b.1	0.0603964	0.0509491
WBGene00002016	Y46H3A.3a.1	0.495355	0.00999001
WBGene00002016	Y46H3A.3b.1	-0.495355	0.00999001
WBGene00002021	F52E1.7a.1	0.0794783	0.0634366
WBGene00002021	F52E1.7b.1	-0.0794783	0.0634366
WBGene00002038	T02C12.1.1	0.132302	0.0579421
WBGene00002038	T02C12.1.2	-0.132302	0.0579421
WBGene00002053	F10C1.2a.1	0.0924936	0.044955
WBGene00002053	F10C1.2b.1	-0.0924936	0.044955
WBGene00002063	Y57A10A.30.1	0.14042	0.0539461
WBGene00002063	Y57A10A.30.2	-0.14042	0.0539461
WBGene00002072	T19B10.7.1	-0.111933	0.017982
WBGene00002072	T19B10.7.2	0.111933	0.017982
WBGene00002079	Y48G1A.5a.1	-0.0960349	0.026973
WBGene00002079	Y48G1A.5b.1	0.0960349	0.026973
WBGene00002080	C49H3.10a.1	-0.114951	0.0666833
WBGene00002080	C49H3.10c.1	0.0810599	0.0666833
WBGene00002090	ZK1251.2a.1	-0.333333	0.0764236
WBGene00002090	ZK1251.2b.1	0.333333	0.0764236
WBGene00002111	ZC334.9.1	-0.260488	0.0524476
WBGene00002111	ZC334.9.2	0.260488	0.0524476
WBGene00002129	K02B2.4a.1	-0.0733168	0.0899101
WBGene00002129	K02B2.4b.1	0.0733168	0.0899101
WBGene00002140	C18H7.2a.1	0.284331	0.0839161
WBGene00002140	C18H7.2b.1	0.184285	0.0839161
WBGene00002140	C18H7.2b.2	-0.468616	0.0839161
WBGene00002142	T23H4.1a.1	-0.333333	0.0879121
WBGene00002142	T23H4.1b.1	0.333333	0.0879121
WBGene00002142	T23H4.1c.1	0	0.0879121
WBGene00002144	Y47G6A.2.1	-0.0620635	0.0619381
WBGene00002144	Y47G6A.2.2	0.0620635	0.0619381
WBGene00002147	C41C4.4a.1	-0.0866044	0.0514486
WBGene00002147	C41C4.4b.1	0.0866044	0.0514486
WBGene00002182	F08F8.3a.1	0.378601	0.0869131
WBGene00002182	F08F8.3a.2	-0.666667	0.0869131
WBGene00002182	F08F8.3b.1	0.288066	0.0869131
WBGene00002184	C47D12.7a.1	-0.169165	0.0979021
WBGene00002184	C47D12.7b.1	0.169165	0.0979021
WBGene00002186	T16H12.6.1	0	0.0499501
WBGene00002187	T07A9.3.1	-0.178996	0.0539461
WBGene00002187	T07A9.3.3	0.152089	0.0539461
WBGene00002196	T01G9.6a.1	0.0799013	0.028971
WBGene00002196	T01G9.6a.2	-0.0846484	0.028971
WBGene00002199	M176.6a.1	-0.227764	0.0544456
WBGene00002199	M176.6b.1	0.227764	0.0544456
WBGene00002201	T17E9.1a.1	-0.0411236	0.0879121
WBGene00002201	T17E9.1b.1	0.0411236	0.0879121
WBGene00002212	B0523.1	0	0.0599401
WBGene00002213	C30F8.4a.1	-0.213027	0.0824176
WBGene00002213	C30F8.4b.2	0.213027	0.0824176
WBGene00002214	M7.2a.1	-0.0545503	0.0424575
WBGene00002214	M7.2b.1	0.0545503	0.0424575
WBGene00002232	F11A6.1a.1	-0.188092	0.0899101
WBGene00002232	F11A6.1a.2	0.221551	0.0899101
WBGene00002233	C25B8.1a.1	0.644567	0.0614386
WBGene00002233	C25B8.1b.1	-0.644567	0.0614386
WBGene00002246	Y73C8B.4.1	0	0.0759241
WBGene00002255	F40F4.4a.1	-0.0421223	0.0794206
WBGene00002255	F40F4.4b.1	0.0421223	0.0794206
WBGene00002262	F13D12.2a.1	-0.0742728	0.0464535
WBGene00002262	F13D12.2b.1	0.0742728	0.0464535
WBGene00002583	B0261.2a.1	-0.096419	0.042957
WBGene00002583	B0261.2b.1	0.096419	0.042957
WBGene00002845	F57B9.2a.1	-0.0324615	0.0974026
WBGene00002845	F57B9.2d.1	-0.0432169	0.0974026
WBGene00002845	F57B9.2e.1	0.0766059	0.0749251
WBGene00002891	C56G2.6a.2	0.0497798	0.0829171
WBGene00002891	C56G2.6c.1	-0.0420767	0.0829171
WBGene00002987	ZC64.4a.1	0	0.0699301
WBGene00002987	ZC64.4b.1	0	0.0699301
WBGene00002987	ZC64.4c.1	0	0.0699301
WBGene00003008	Y54G2A.1.1	0	0.0694306
WBGene00003018	T14F9.5.1	0	0.0859141
WBGene00003035	ZK632.13a.1	-0.0612166	0.0534466
WBGene00003035	ZK632.13b.1	0.0612166	0.0534466
WBGene00003075	T04H1.6.1	0	0.0779221
WBGene00003085	Y37A1B.1a.1	-0.0437337	0.0979021
WBGene00003085	Y37A1B.1d.1	0.0500366	0.0979021
WBGene00003087	F49H12.1a.1	-0.168387	0.0494505
WBGene00003087	F49H12.1b.1	0.168387	0.0494505
WBGene00003089	K02C4.4a.1	0.268993	0.0894106
WBGene00003089	K02C4.4b.1	-0.268993	0.0894106
WBGene00003100	Y53C12B.5a.1	0	0.0719281
WBGene00003100	Y53C12B.5b.1	-0.127798	0.0719281
WBGene00003100	Y53C12B.5b.2	0.127798	0.0719281
WBGene00003132	Y110A7A.17a.1	0.0425664	0.0989011
WBGene00003132	Y110A7A.17b.1	-0.0425664	0.0989011
WBGene00003158	ZK632.1a.1	-0.101531	0.0164835
WBGene00003158	ZK632.1b.1	0.101531	0.0164835
WBGene00003167	F01D4.6a.1	-0.647152	0.0929071
WBGene00003167	F01D4.6c.1	0.504474	0.0929071
WBGene00003167	F01D4.6d.1	0.142678	0.0929071
WBGene00003168	T01C8.7.1	0	0.0509491
WBGene00003173	C50H2.3a.1	0.524417	0.0634366
WBGene00003173	C50H2.3b.1	-0.524417	0.0634366
WBGene00003174	F16F9.5.1	0	0.0884116
WBGene00003178	F57H12.7a.1	0.116508	0.0869131
WBGene00003178	F57H12.7b.1	-0.116508	0.0869131
WBGene00003235	C52E4.2a.2	-0.0843366	0.0939061
WBGene00003235	C52E4.2c.1	0.0771	0.0939061
WBGene00003239	C35C5.4a.1	-0.17324	0.0314685
WBGene00003239	C35C5.4b.1	0.17324	0.0314685
WBGene00003371	F09F7.2a.1	0.0508613	0.0367133
WBGene00003371	F09F7.2a.2	-0.0495603	0.0367133
WBGene00003377	C39E6.4.1	0	0.0789211
WBGene00003401	F43C1.2a.1	-0.106161	0.020979
WBGene00003401	F43C1.2b.1	0.104419	0.020979
WBGene00003405	ZC302.1.1	-0.0787477	0.046953
WBGene00003405	ZC302.1.2	0.0787477	0.046953
WBGene00003406	Y37D8A.9a.1	-0.022105	0.0884116
WBGene00003406	Y37D8A.9b.1	0.022105	0.0884116
WBGene00003420	T02G5.6a	0.430712	0.0599401
WBGene00003420	T02G5.6b	-0.430712	0.0599401
WBGene00003443	C34F11.4.1	0	0.0899101
WBGene00003478	F53A2.8a.1	-0.0920511	0.0854146
WBGene00003478	F53A2.8c.1	0.0798307	0.0854146
WBGene00003518	R107.1a.1	0.278934	0.0554446
WBGene00003518	R107.1b.1	-0.278934	0.0554446
WBGene00003527	C34D4.9.1	0.333333	0.0739261
WBGene00003527	C34D4.9.2	-0.333333	0.0739261
WBGene00003531	C24F3.3.1	0	0.0794206
WBGene00003540	T11F9.5.1	0	0.0959041
WBGene00003544	F46C5.3.1	0	0.0749251
WBGene00003546	F42A10.8.1	0	0.0904096
WBGene00003547	F58A6.4.1	0	0.047952
WBGene00003551	K04E7.3.1	0	0.0719281
WBGene00003552	C26C6.3.1	0	0.0794206
WBGene00003554	F57C12.1.1	0	0.0799201
WBGene00003558	C27F2.2a.1	0.333333	0.0719281
WBGene00003558	C27F2.2b.1	-0.333333	0.0719281
WBGene00003562	F09G8.4.1	0	0.0899101
WBGene00003563	C44C1.3.1	0	0.0914086
WBGene00003569	F35C12.2a.1	0.442477	0.0649351
WBGene00003569	F35C12.2b.1	-0.442477	0.0649351
WBGene00003575	Y97E10B.7a.1	0	0.0759241
WBGene00003575	Y97E10B.7b.1	0	0.0759241
WBGene00003586	F13H10.2a.1	0.057045	0.0929071
WBGene00003586	F13H10.2b.1	-0.057045	0.0929071
WBGene00003589	T07C4.9a.1	0.100271	0.0864136
WBGene00003589	T07C4.9b.1	-0.100271	0.0864136
WBGene00003606	F54D1.4a.1	0.405194	0.0884116
WBGene00003606	F54D1.4b	-0.405194	0.0884116
WBGene00003612	Y5H2B.2a.1	0.137817	0.0599401
WBGene00003612	Y5H2B.2b.1	-0.137817	0.0599401
WBGene00003623	F11C1.6a.1	0.581484	0.0879121
WBGene00003623	F11C1.6a.2	-0.35607	0.0879121
WBGene00003623	F11C1.6b.1	-0.225415	0.0879121
WBGene00003628	C07A12.3a.1	-0.23744	0.0404595
WBGene00003628	C07A12.3b.1	0.23744	0.0404595
WBGene00003649	T27B7.1a.1	0.155264	0.0989011
WBGene00003649	T27B7.1b.1	-0.155264	0.0989011
WBGene00003651	W01D2.2a.1	0.434935	0.035964
WBGene00003651	W01D2.2c.1	-0.346592	0.035964
WBGene00003655	Y17D7A.3a.1	0.26004	0.0524476
WBGene00003655	Y17D7A.3b.1	-0.26004	0.0524476
WBGene00003657	C08F8.8.1	0	0.0654346
WBGene00003658	H12C20.3a.1	-0.206696	0.016983
WBGene00003658	H12C20.3b.1	0.206696	0.016983
WBGene00003662	C17A2.8.1	0	0.0689311
WBGene00003669	T26H2.9a.1	0.281824	0.0709291
WBGene00003669	T26H2.9b.1	-0.281824	0.0709291
WBGene00003670	H10E21.3a.1	0.160158	0.0864136
WBGene00003670	H10E21.3b.1	-0.160158	0.0864136
WBGene00003671	C47F8.8.1	0	0.0609391
WBGene00003673	F48G7.3a	-0.16278	0.0869131
WBGene00003673	F48G7.3b	0.16278	0.0869131
WBGene00003683	T24A6.9a.1	0.0978931	0.0764236
WBGene00003683	T24A6.9b.1	-0.666667	0.0764236
WBGene00003683	T24A6.9c.1	0.568774	0.0764236
WBGene00003683	T24A6.9d	0	0.0764236
WBGene00003685	Y39B6A.17a.1	0.150086	0.0849151
WBGene00003685	Y39B6A.17b.1	-0.150086	0.0849151
WBGene00003689	M02H5.1.1	0	0.0894106
WBGene00003706	F09C6.9.1	0	0.0869131
WBGene00003732	F14B8.1a.1	0.197763	0.0754246
WBGene00003732	F14B8.1b.1	-0.197763	0.0754246
WBGene00003742	F59C6.6.1	0	0.0879121
WBGene00003754	T13A10.5a.1	-0.248084	0.044955
WBGene00003754	T13A10.5b.1	0.248084	0.044955
WBGene00003763	Y43F8C.1.1	0	0.0454545
WBGene00003774	F07F6.6.1	0	0.041958
WBGene00003775	T01C3.10a.1	0.428205	0.048951
WBGene00003775	T01C3.10b.1	-0.428205	0.048951
WBGene00003779	Y75B8A.2a.1	0.268363	0.0929071
WBGene00003779	Y75B8A.2b.1	-0.292733	0.0929071
WBGene00003799	Y37E3.15a.1	-0.0873585	0.0554446
WBGene00003799	Y37E3.15c.1	0.0877036	0.0554446
WBGene00003803	F10G8.3.1	-0.0361868	0.0889111
WBGene00003803	F10G8.3.2	0.0361868	0.0889111
WBGene00003808	T05A1.1a.1	0	0.0859141
WBGene00003808	T05A1.1b.1	0.0731375	0.0859141
WBGene00003808	T05A1.1b.2	0	0.0859141
WBGene00003808	T05A1.1c.1	-0.0731375	0.0859141
WBGene00003826	Y56A3A.1a.1	-0.0512868	0.0724276
WBGene00003826	Y56A3A.1b.1	0.0512868	0.0724276
WBGene00003838	F28H7.10a.1	0	0.043956
WBGene00003838	F28H7.10b.1	0	0.043956
WBGene00003839	T09A12.3a.1	0.370574	0.0609391
WBGene00003839	T09A12.3b.1	-0.370574	0.0609391
WBGene00003847	F25D7.3a.1	0.350898	0.0569431
WBGene00003847	F25D7.3b.1	-0.350898	0.0569431
WBGene00003851	Y102E9.1a.2	-0.236105	0.0134865
WBGene00003851	Y102E9.1a.3	0.258099	0.011988
WBGene00003856	C53B7.5.1	0	0.0799201
WBGene00003858	K04G7.3a.1	-0.0558193	0.0844156
WBGene00003858	K04G7.3b.1	0.0558193	0.0844156
WBGene00003879	F57H12.3.1	0	0.0709291
WBGene00003886	R31.3.1	0	0.0759241
WBGene00003887	T05D4.4a.1	0.219379	0.0574426
WBGene00003887	T05D4.4b.1	-0.219379	0.0574426
WBGene00003891	F11C7.5.1	-0.036599	0.0544456
WBGene00003891	F11C7.5.2	0.036599	0.0544456
WBGene00003892	Y75B8A.12.1	0	0.0699301
WBGene00003902	Y106G6H.2.1	0.0317109	0.0531968
WBGene00003902	Y106G6H.2.2	-0.0315666	0.0531968
WBGene00003903	F18H3.3a.2	-0.137393	0.0909091
WBGene00003903	F18H3.3b.1	0.143706	0.0909091
WBGene00003909	F45B8.4.1	0	0.0589411
WBGene00003911	C09B8.7a.1	-0.134023	0.0951548
WBGene00003911	C09B8.7c.1	0.111504	0.0951548
WBGene00003912	C38D4.6a.1	0.0718541	0.0566101
WBGene00003912	C38D4.6a.2	-0.0563483	0.0655594
WBGene00003912	C38D4.6b.1	0.0839247	0.0566101
WBGene00003912	C38D4.6b.2	-0.0987489	0.0566101
WBGene00003917	F58B6.3b.1	-0.0782582	0.0734266
WBGene00003917	F58B6.3c.1	0.110136	0.0734266
WBGene00003939	F27E5.2.1	0	0.0969031
WBGene00003964	H06O01.1.1	0.0487787	0.0244755
WBGene00003964	H06O01.1.2	-0.0487787	0.0244755
WBGene00003965	H42K12.1a.1	0.103385	0.0759241
WBGene00003965	H42K12.1b.1	-0.103385	0.0759241
WBGene00003981	F18G5.2a.1	0.306665	0.0794206
WBGene00003981	F18G5.2b.1	-0.306665	0.0794206
WBGene00003992	ZK381.4a.2	0.0337089	0.0741758
WBGene00003992	ZK381.4b.1	-0.0337089	0.0741758
WBGene00004002	T21E8.3.1	0	0.0749251
WBGene00004005	DH11.3.1	-0.148553	0.0899101
WBGene00004005	DH11.3.2	0.148553	0.0899101
WBGene00004026	T20B3.7.1	-0.333333	0.0744256
WBGene00004026	T20B3.7.2	0.333333	0.0744256
WBGene00004052	H23L24.5.1	0	0.0969031
WBGene00004089	VF11C1L.1a.1	0.19908	0.040959
WBGene00004089	VF11C1L.1b.1	-0.19908	0.040959
WBGene00004093	C18E3.7b.1	0.144916	0.0899101
WBGene00004103	C09G1.1	0	0.0879121
WBGene00004115	DY3.5.1	0	0.0939061
WBGene00004118	F10F2.9.1	0	0.0784216
WBGene00004122	F35D11.2a.1	0.570526	0.030969
WBGene00004122	F35D11.2a.2	-0.562114	0.030969
WBGene00004127	F52D1.3a.1	-0.271698	0.0909091
WBGene00004127	F52D1.3b.1	0.138948	0.0909091
WBGene00004127	F52D1.3c.1	0.13275	0.0909091
WBGene00004146	T06E4.11.1	0	0.047952
WBGene00004149	T16A1.7.1	0	0.043956
WBGene00004156	W02A2.3a.1	0.275777	0.0584416
WBGene00004156	W02A2.3b.1	-0.275777	0.0584416
WBGene00004189	T20H4.3a.1	0.0155606	0.0989011
WBGene00004189	T20H4.3b.1	-0.0155606	0.0989011
WBGene00004193	C15H9.8a.1	-0.122116	0.0894106
WBGene00004193	C15H9.8b.1	0.122116	0.0894106
WBGene00004194	C34C6.6a.1	0.120215	0.0789211
WBGene00004194	C34C6.6b.1	-0.120215	0.0789211
WBGene00004207	D2089.4a.1	-0.113314	0.0999001
WBGene00004207	D2089.4b.1	0.113314	0.0999001
WBGene00004209	F21H12.4	0	0.0819181
WBGene00004211	F07C3.1.1	0	0.0509491
WBGene00004218	C41D7.2.1	0.333333	0.0684316
WBGene00004218	C41D7.2.2	-0.333333	0.0684316
WBGene00004224	F55F8.1.1	0	0.0809191
WBGene00004224	F55F8.1.2	0	0.0809191
WBGene00004229	T07H8.6.1	0	0.0789211
WBGene00004231	Y18D10A.7.1	0	0.045954
WBGene00004255	T20G5.5.1	0	0.0684316
WBGene00004258	D2023.2a.1	-0.0624535	0.0539461
WBGene00004258	D2023.2b.1	0.0677958	0.0539461
WBGene00004277	Y92C3B.3b.1	0.080419	0.0899101
WBGene00004277	Y92C3B.3b.2	-0.0832635	0.0899101
WBGene00004297	Y43C5A.6b.1	-0.066509	0.0974026
WBGene00004297	Y43C5A.6c.1	0.066509	0.0974026
WBGene00004315	T23F6.4a.1	-0.0628244	0.0719281
WBGene00004315	T23F6.4b.1	0.0628244	0.0719281
WBGene00004318	T22C1.10a.1	0.0888177	0.0579421
WBGene00004318	T22C1.10b.1	-0.0888177	0.0579421
WBGene00004335	C47C12.3a.1	0.49272	0.0504496
WBGene00004335	C47C12.3b.1	-0.49272	0.0504496
WBGene00004357	Y51H4A.3a.1	-0.049571	0.0264735
WBGene00004357	Y51H4A.3b	0.049571	0.0264735
WBGene00004374	T11F8.3a.1	-0.0260659	0.0634366
WBGene00004374	T11F8.3b.1	0.0260659	0.0634366
WBGene00004387	R07E5.14.1	-0.057134	0.026973
WBGene00004387	R07E5.14.2	0.057134	0.026973
WBGene00004401	C48B4.2.1	0	0.0839161
WBGene00004404	Y54E10A.14a.1	-0.079649	0.0744256
WBGene00004404	Y54E10A.14b.1	0.079649	0.0744256
WBGene00004409	Y37E3.7.1	-0.0547092	0.0244755
WBGene00004409	Y37E3.7.2	0.0547092	0.0244755
WBGene00004439	F52B5.6.1	0.0128662	0.0969031
WBGene00004439	F52B5.6.2	0.0283019	0.0969031
WBGene00004439	F52B5.6.3	0.0151525	0.0969031
WBGene00004439	F52B5.6.4	-0.0563207	0.0969031
WBGene00004445	W09C5.6a.1	-0.0905807	0.0134865
WBGene00004445	W09C5.6b.1	0.0905807	0.0134865
WBGene00004446	T24B8.1a.1	-0.019635	0.0664336
WBGene00004446	T24B8.1b.1	0.019635	0.0664336
WBGene00004447	F10E7.7.1	0.0275711	0.0544456
WBGene00004447	F10E7.7.2	-0.0275711	0.0544456
WBGene00004462	F57B9.10a.1	-0.0508076	0.0464535
WBGene00004462	F57B9.10b.1	0.0508076	0.0464535
WBGene00004475	Y71A12B.1a.1	-0.0292598	0.0534466
WBGene00004475	Y71A12B.1c.1	0.0292598	0.0534466
WBGene00004507	C18H9.7.1	-0.311746	0.0629371
WBGene00004507	C18H9.7.2	0.311746	0.0629371
WBGene00004719	F15A2.6a.1	-0.358769	0.0739261
WBGene00004719	F15A2.6b.1	0.358769	0.0739261
WBGene00004728	F21H11.2a.1	-0.108155	0.0414585
WBGene00004728	F21H11.2b.1	0.108155	0.0414585
WBGene00004740	T10H9.2.1	0	0.0949051
WBGene00004744	D2013.8a.1	0.238436	0.010989
WBGene00004744	D2013.8b.1	-0.573104	0.00599401
WBGene00004744	D2013.8b.5	0.283572	0.00749251
WBGene00004771	C32E12.5.1	0.210401	0.0764236
WBGene00004771	C32E12.5.2	0.109903	0.0914086
WBGene00004771	C32E12.5.3	-0.320303	0.0674326
WBGene00004787	H06I04.2a.1	-0.228775	0.0234765
WBGene00004787	H06I04.2b.1	0.228775	0.0234765
WBGene00004801	F46G10.7b.1	0.277968	0.0874126
WBGene00004801	F46G10.7b.2	-0.359118	0.0799201
WBGene00004802	F46G10.3.1	-0.294219	0.046953
WBGene00004802	F46G10.3.2	0.294219	0.046953
WBGene00004824	F56B3.4a.1	-0.100612	0.0876623
WBGene00004824	F56B3.4c.1	0.111223	0.0876623
WBGene00004873	Y47D3A.26a.1	-0.121261	0.0244755
WBGene00004873	Y47D3A.26c.1	0.121261	0.0244755
WBGene00004878	Y69A2AR.4.1	-0.333333	0.0874126
WBGene00004878	Y69A2AR.4.2	0.333333	0.0874126
WBGene00004879	C48B6.6a.1	0.0745457	0.0904096
WBGene00004879	C48B6.6b.1	-0.0745457	0.0904096
WBGene00004904	Y46G5A.30.1	0	0.0619381
WBGene00004955	F56A3.4.1	-0.0719204	0.03996
WBGene00004955	F56A3.4.2	0.0719204	0.03996
WBGene00004958	ZK524.1.1	0	0.0829171
WBGene00004972	R10H10.2.1	0	0.0669331
WBGene00005008	C07A12.5a.1	-0.229767	0.016983
WBGene00005008	C07A12.5b.1	0.229767	0.016983
WBGene00005009	C09H6.1a.1	-0.0679467	0.0894106
WBGene00005009	C09H6.1b.1	0.0679467	0.0894106
WBGene00005017	C01B12.1.1	0	0.0679321
WBGene00005018	F23H12.4a.1	-0.0594952	0.0834166
WBGene00005018	F23H12.4b.1	0.0594952	0.0834166
WBGene00005019	D2096.4a.1	-0.0615152	0.0524476
WBGene00005019	D2096.4b.1	0.0615152	0.0524476
WBGene00005025	C52E12.3.1	-0.0512826	0.0869131
WBGene00005025	C52E12.3.2	0.0512826	0.0869131
WBGene00005058	B0304.5.1	-0.333333	0.0669331
WBGene00005058	B0304.5.2	0.333333	0.0669331
WBGene00005059	B0304.6.1	0	0.0754246
WBGene00005061	B0304.8.1	0	0.0894106
WBGene00005063	T21H8.2.1	0	0.0454545
WBGene00005110	T19H12.5.1	0	0.0719281
WBGene00005147	F48F5.4a.1	-0.386211	0.0709291
WBGene00005147	F48F5.4b	0.386211	0.0709291
WBGene00005191	Y51A2D.12.1	0	0.0764236
WBGene00005226	F09E5.4.1	0	0.0534466
WBGene00005241	F55C5.9.1	0	0.0544456
WBGene00005292	T10D4.5.1	0	0.0824176
WBGene00005366	K08G2.2	0	0.0599401
WBGene00005427	Y113G7B.2.1	-0.137828	0.047952
WBGene00005427	Y113G7B.2.2	0.137828	0.047952
WBGene00005602	C03G6.3a.1	-0.333333	0.0714286
WBGene00005602	C03G6.3b	0.333333	0.0714286
WBGene00005654	F36D3.3.1	0	0.0939061
WBGene00005662	W03B1.4a.1	0.112004	0.0334665
WBGene00005662	W03B1.4b.1	-0.112004	0.0334665
WBGene00005832	C25F9.1a.1	-0.204528	0.0894106
WBGene00005832	C25F9.1d	0.204528	0.0894106
WBGene00005931	T06E6.3.1	0	0.0669331
WBGene00006009	T21B4.12.1	0	0.0699301
WBGene00006016	F32H5.6a.1	-0.899853	0.0784216
WBGene00006016	F32H5.6b.1	0.586796	0.0784216
WBGene00006016	F32H5.6c.1	0.313057	0.0784216
WBGene00006050	K07F5.11.1	0	0.0864136
WBGene00006051	T28H11.5.1	0	0.0669331
WBGene00006062	F30A10.8.2	0.342717	0.032967
WBGene00006062	F30A10.8.3	-0.342717	0.032967
WBGene00006065	F52D10.5.1	0	0.0519481
WBGene00006068	Y71H9A.2.1	0	0.0814186
WBGene00006215	T01G5.5.1	0	0.0674326
WBGene00006224	T10H9.6a.1	0.333333	0.0789211
WBGene00006224	T10H9.6b.1	-0.333333	0.0789211
WBGene00006258	C07G3.3a.1	-0.333333	0.0724276
WBGene00006258	C07G3.3b.1	0.333333	0.0724276
WBGene00006288	C05E4.13a.1	0	0.0809191
WBGene00006288	C05E4.13b.1	0	0.0809191
WBGene00006309	D1014.1.1	0	0.0889111
WBGene00006349	F39B2.4a.1	0.108537	0.0679321
WBGene00006349	F39B2.4b.1	-0.108537	0.0679321
WBGene00006379	T23D8.9a.1	-0.157533	0.0891608
WBGene00006379	T23D8.9c.1	0.111587	0.0891608
WBGene00006396	Y56A3A.4a.1	0.0661512	0.0674326
WBGene00006396	Y56A3A.4b.1	-0.0661512	0.0674326
WBGene00006410	ZK470.5a.1	0.209629	0.0354645
WBGene00006410	ZK470.5b.1	-0.209629	0.0354645
WBGene00006416	T13A10.11a.1	0.358339	0.0854146
WBGene00006416	T13A10.11a.2	-0.541588	0.0854146
WBGene00006416	T13A10.11b	0.183249	0.0854146
WBGene00006429	M176.1a.1	0.225284	0.0954046
WBGene00006429	M176.1b.1	-0.225284	0.0954046
WBGene00006434	F09E5.15a.1	0.0137796	0.0879121
WBGene00006434	F09E5.15b.1	-0.0744314	0.0284715
WBGene00006434	F09E5.15c.1	0.0606518	0.0284715
WBGene00006450	C28C12.10a.1	-0.126488	0.0876623
WBGene00006450	C28C12.10b.1	0.113971	0.0876623
WBGene00006450	C28C12.10e.1	-0.0857075	0.0876623
WBGene00006450	C28C12.10f.1	0.0982251	0.0876623
WBGene00006460	F25D1.1a.1	-0.0616537	0.0367133
WBGene00006460	F25D1.1c.1	0.0616537	0.0367133
WBGene00006461	M01D7.4a.1	-0.100071	0.0899101
WBGene00006461	M01D7.4b.1	0.100071	0.0899101
WBGene00006487	C30H6.2.1	0	0.0669331
WBGene00006487	C30H6.2.2	0	0.0669331
WBGene00006518	F27D4.5.1	-0.0473707	0.0939061
WBGene00006518	F27D4.5.2	0.0473707	0.0939061
WBGene00006525	F36F2.5.1	0	0.0614386
WBGene00006526	ZC84.2.1	0	0.045954
WBGene00006531	F16D3.1.1	0	0.0689311
WBGene00006541	H13N06.6a.1	0.112247	0.0337163
WBGene00006541	H13N06.6b.1	-0.0258411	0.0919081
WBGene00006541	H13N06.6c.1	-0.0864059	0.0337163
WBGene00006550	C36C9.2.1	0	0.0474525
WBGene00006551	ZK380.1.1	0	0.0949051
WBGene00006558	Y73F8A.16.1	0	0.0894106
WBGene00006561	Y38C1AA.4a.1	-0.140737	0.0849151
WBGene00006561	Y38C1AA.4b.1	0.140737	0.0849151
WBGene00006565	Y63D3A.5.1	0.0509735	0.0654346
WBGene00006565	Y63D3A.5.2	-0.0509735	0.0654346
WBGene00006576	C38C10.1.1	0	0.0724276
WBGene00006582	C08D8.2b.1	0.209304	0.0914086
WBGene00006582	C08D8.2b.2	-0.226505	0.0914086
WBGene00006589	T08B1.2a.1	0.103797	0.0944056
WBGene00006589	T08B1.2c.1	-0.103797	0.0944056
WBGene00006598	Y37A1B.13.1	0	0.0619381
WBGene00006605	C15F1.3a.1	-0.0750378	0.0981518
WBGene00006605	C15F1.3c.1	0.0753813	0.0981518
WBGene00006614	ZC21.2a.1	0.333333	0.0634366
WBGene00006614	ZC21.2b.1	-0.333333	0.0634366
WBGene00006615	R06B10.4a.1	-0.503986	0.0494505
WBGene00006615	R06B10.4b.1	0.503986	0.0494505
WBGene00006620	C07G1.1.1	0	0.0784216
WBGene00006622	F31D4.6.1	0	0.0754246
WBGene00006643	C02F12.1a.1	-0.544318	0.0909091
WBGene00006643	C02F12.1b.1	0.138517	0.0909091
WBGene00006643	C02F12.1c.1	0.405802	0.0909091
WBGene00006643	C02F12.1d.1	0	0.0909091
WBGene00006643	C02F12.1e.1	0	0.0909091
WBGene00006648	W03F9.5.1	0.190024	0.0127373
WBGene00006648	W03F9.5.2	-0.180822	0.0127373
WBGene00006650	F09E10.11a	0.43553	0
WBGene00006650	F09E10.11b	-0.43553	0
WBGene00006654	C40H5.5a.1	0.333333	0.0649351
WBGene00006654	C40H5.5b.1	-0.333333	0.0649351
WBGene00006663	ZC410.4a.1	-0.128555	0.0954046
WBGene00006663	ZC410.4b.1	0.128555	0.0954046
WBGene00006664	ZK1251.8a.1	0.666667	0.0594406
WBGene00006664	ZK1251.8b.1	-0.666667	0.0594406
WBGene00006681	F46A9.3a.1	-0.279508	0.0804196
WBGene00006681	F46A9.3b.1	0.279508	0.0804196
WBGene00006687	F31D4.7.1	0	0.0559441
WBGene00006688	R12G8.2.1	0	0.0669331
WBGene00006690	C24H11.8a.1	0.428156	0.0609391
WBGene00006690	C24H11.8b.1	-0.428156	0.0609391
WBGene00006691	T28A8.1a.1	0.333333	0.0669331
WBGene00006691	T28A8.1b.1	0	0.0669331
WBGene00006691	T28A8.1c.1	-0.333333	0.0669331
WBGene00006702	Y71G12B.15a.1	-0.0580094	0.025974
WBGene00006702	Y71G12B.15b.1	0.0580094	0.025974
WBGene00006703	D1022.1a.1	-0.0901754	0.035964
WBGene00006703	D1022.1b.1	0.0901754	0.035964
WBGene00006712	B0403.2.1	0	0.0904096
WBGene00006717	C06E2.7.1	0	0.0819181
WBGene00006724	C08B11.7.1	0.0360661	0.0989011
WBGene00006724	C08B11.7.2	-0.0360661	0.0989011
WBGene00006727	F25B5.4.1	0.0215552	0.0704296
WBGene00006727	F25B5.4.2	-0.0215552	0.0704296
WBGene00006748	R13A1.4a.1	0.666667	0.0554446
WBGene00006748	R13A1.4b.1	0.333333	0.0554446
WBGene00006748	R13A1.4c.1	0	0.0554446
WBGene00006748	R13A1.4d.1	-1	0
WBGene00006754	F07A5.7a.1	-0.0833882	0.0457043
WBGene00006754	F07A5.7a.2	0.0610369	0.0457043
WBGene00006754	F07A5.7b.1	0.0223514	0.0884116
WBGene00006760	H14N18.1b.1	0.14391	0.0914086
WBGene00006760	H14N18.1c.1	-0.11603	0.0914086
WBGene00006783	T20G5.6.1	0	0.0779221
WBGene00006790	F55D12.4a.1	0.108851	0.0529471
WBGene00006790	F55D12.4b.1	-0.108851	0.0529471
WBGene00006833	F53F10.4a.1	-0.104934	0.024975
WBGene00006833	F53F10.4b.1	0.104934	0.024975
WBGene00006839	F09B9.2a.1	-0.0917076	0.0689311
WBGene00006839	F09B9.2b.1	0.0917076	0.0689311
WBGene00006873	M142.4.1	0	0.0979021
WBGene00006894	T17A3.1.1	0	0.0484515
WBGene00006914	F35H10.4.1	0.110405	0.0719281
WBGene00006914	F35H10.4.3	-0.162527	0.0644356
WBGene00006937	Y56A3A.32a.1	-0.0882589	0.0801698
WBGene00006937	Y56A3A.32b	0.0882589	0.0801698
WBGene00006950	ZK678.5.1	0	0.0774226
WBGene00006952	ZK377.1.1	0	0.0764236
WBGene00006954	C29F3.2.1	0	0.0564436
WBGene00006958	R06C1.3a.1	-0.0718816	0.0724276
WBGene00006958	R06C1.3b.1	0.0718816	0.0724276
WBGene00007006	C10C6.2.1	0	0.0834166
WBGene00007007	C44C8.6.1	-0.10047	0.0954046
WBGene00007007	C44C8.6.2	0.10047	0.0954046
WBGene00007020	Y104H12D.1a.1	-0.0939817	0.0494505
WBGene00007020	Y104H12D.1b.1	0.0939817	0.0494505
WBGene00007042	C26C6.1a.1	-0.072852	0.0659341
WBGene00007042	C26C6.1b.1	0.0923587	0.0659341
WBGene00007049	C53A5.4.1	0	0.0889111
WBGene00007067	4R79.2a.1	0.0704335	0.0894106
WBGene00007067	4R79.2b.1	-0.0704335	0.0894106
WBGene00007092	B0001.7b.1	-0.09327	0.0869131
WBGene00007092	B0001.7c.1	0.123661	0.0869131
WBGene00007099	B0024.9a.1	-0.0400785	0.0929071
WBGene00007099	B0024.9b.1	0.0400785	0.0929071
WBGene00007104	B0024.15.1	0	0.0669331
WBGene00007111	B0035.12.1	-0.110946	0.0214785
WBGene00007111	B0035.12.2	0.110946	0.0214785
WBGene00007125	B0250.8.1	0	0.0964036
WBGene00007146	B0334.6.1	0	0.0999001
WBGene00007152	B0365.5a.1	0.134693	0.0889111
WBGene00007152	B0365.5b.1	-0.134693	0.0889111
WBGene00007154	B0365.7.1	0	0.0444555
WBGene00007164	B0391.9.1	0	0.0609391
WBGene00007175	B0395.3.1	-0.0853195	0.0996503
WBGene00007175	B0395.3.3	0.0911938	0.0996503
WBGene00007191	B0491.4a.1	-0.504421	0.0639361
WBGene00007191	B0491.4b.1	0.504421	0.0639361
WBGene00007210	BE10.2.1	-0.221358	0.0924076
WBGene00007210	BE10.2.2	0.221358	0.0924076
WBGene00007212	BE10.4.1	0	0.0619381
WBGene00007213	C01A2.1a.1	0.152188	0.0969031
WBGene00007213	C01A2.1b.1	0.198864	0.0969031
WBGene00007213	C01A2.1c.1	-0.276035	0.0969031
WBGene00007213	C01A2.1c.2	-0.075017	0.0969031
WBGene00007214	C01A2.2a.1	0.161269	0.0979021
WBGene00007214	C01A2.2b.1	-0.161269	0.0979021
WBGene00007220	C01B9.1a.1	-0.333333	0.0864136
WBGene00007220	C01B9.1b.1	0.333333	0.0864136
WBGene00007235	C01G10.8.1	-0.0348541	0.047952
WBGene00007235	C01G10.8.2	0.0348541	0.047952
WBGene00007237	C01G10.10a.1	-0.0955061	0.0919081
WBGene00007237	C01G10.10b	0.0955061	0.0919081
WBGene00007248	C01G12.8.1	0	0.0579421
WBGene00007253	C01H6.3.1	0	0.0979021
WBGene00007266	C03A3.1a.1	-0.321925	0.0789211
WBGene00007266	C03A3.1b.1	0.321925	0.0789211
WBGene00007281	C03E10.3.1	-0.666667	0.0831668
WBGene00007281	C03E10.3.3	0.666667	0.0831668
WBGene00007287	C04A11.3a.1	-0.161651	0.0424575
WBGene00007287	C04A11.3b.1	0.161651	0.0424575
WBGene00007288	C04A11.5.1	0	0.0879121
WBGene00007288	C04A11.5.2	0	0.0879121
WBGene00007299	C04F12.5.1	-0.116848	0.0414585
WBGene00007299	C04F12.5.2	0.116848	0.0414585
WBGene00007308	C04G2.9.1	0	0.0664336
WBGene00007309	C04G2.10a.1	0.230393	0.0744256
WBGene00007309	C04G2.10b.1	-0.493308	0.0744256
WBGene00007309	C04G2.10c.1	0.262914	0.0744256
WBGene00007314	C04H5.3.1	0	0.0619381
WBGene00007328	C05C10.1.1	0	0.0804196
WBGene00007331	C05C10.4.1	-0.271882	0.00849151
WBGene00007331	C05C10.4.2	0.271882	0.00849151
WBGene00007332	C05C10.5a.1	-0.0933063	0.0247253
WBGene00007332	C05C10.5b.1	0.0933063	0.0247253
WBGene00007338	C05C12.6.1	0.333333	0.0709291
WBGene00007338	C05C12.6.2	-0.333333	0.0709291
WBGene00007339	C05D12.1.1	0.333333	0.0779221
WBGene00007339	C05D12.1.2	-0.333333	0.0779221
WBGene00007351	C05G5.5a.1	-0.313375	0.0729271
WBGene00007351	C05G5.5b.1	0.16543	0.0729271
WBGene00007351	C05G5.5c.1	0.147945	0.0729271
WBGene00007354	C06A1.3.1	0	0.0504496
WBGene00007357	C06A12.3b.1	0.310806	0.0164835
WBGene00007357	C06A12.3c.1	-0.385938	0.0104895
WBGene00007361	C06B3.2.1	0	0.0799201
WBGene00007391	C06H2.7a.1	-0.147845	0.0414585
WBGene00007391	C06H2.7b.1	0.147845	0.0414585
WBGene00007394	C06H5.6a.1	0.15018	0.0951548
WBGene00007394	C06H5.6a.2	-0.159469	0.0951548
WBGene00007397	C07A4.2.1	0	0.0764236
WBGene00007423	C08B6.2a.1	-0.242163	0.0884116
WBGene00007423	C08B6.2b.1	0.333333	0.0884116
WBGene00007423	C08B6.2c.1	-0.0911704	0.0884116
WBGene00007423	C08B6.2d.1	0	0.0884116
WBGene00007424	C08B6.3a.1	-0.219777	0.0484515
WBGene00007424	C08B6.3b.1	0.219777	0.0484515
WBGene00007429	C08B6.8a.1	0.0476138	0.0894106
WBGene00007429	C08B6.8b.1	-0.0476138	0.0894106
WBGene00007444	C08F8.2b.1	-0.0836005	0.0609391
WBGene00007444	C08F8.2c.1	0.0836005	0.0609391
WBGene00007452	C08F11.3.1	0	0.0484515
WBGene00007454	C08F11.7.1	0.333333	0.0819181
WBGene00007454	C08F11.7.2	-0.333333	0.0819181
WBGene00007462	C08H9.1.1	0	0.0939061
WBGene00007467	C08H9.7.1	0	0.0779221
WBGene00007469	C08H9.10.1	0	0.0619381
WBGene00007470	C08H9.11.1	0	0.0674326
WBGene00007472	C08H9.13.1	0	0.0784216
WBGene00007482	C09F12.2.1	0	0.0799201
WBGene00007487	C09G1.5a.1	0.506366	0.0699301
WBGene00007487	C09G1.5b.1	-0.544986	0.0699301
WBGene00007488	C09G5.2a.1	-0.0638106	0.0844156
WBGene00007488	C09G5.2b.1	0.0638106	0.0844156
WBGene00007490	C09G5.8a.1	0.062856	0.0829171
WBGene00007490	C09G5.8b.1	0.240879	0.0829171
WBGene00007490	C09G5.8c	-0.303735	0.0829171
WBGene00007495	C09G9.5a.1	-0.22695	0.0664336
WBGene00007495	C09G9.5b.1	-0.333333	0.0664336
WBGene00007495	C09G9.5c.1	0.560284	0.0664336
WBGene00007502	C09H10.8.1	0	0.0669331
WBGene00007518	C11E4.3a.1	-0.634465	0.0694306
WBGene00007518	C11E4.3b.1	0.634465	0.0694306
WBGene00007521	C11E4.7a.1	-0.121852	0.0974026
WBGene00007521	C11E4.7b.1	0.121852	0.0974026
WBGene00007534	C12D8.1c.1	0.0852704	0.0911588
WBGene00007534	C12D8.1d	-0.0751998	0.0911588
WBGene00007552	C13C12.2.1	0.666667	0.0884116
WBGene00007552	C13C12.2.2	0	0.0959041
WBGene00007552	C13C12.2.3	-0.666667	0.0884116
WBGene00007562	C14A4.12a.1	0.240081	0.0969031
WBGene00007562	C14A4.12b.1	-0.240081	0.0969031
WBGene00007585	C14C10.2a.1	-0.0908604	0.0954046
WBGene00007585	C14C10.2b.1	0.0908604	0.0954046
WBGene00007593	C14H10.3a.1	0.355332	0.0367133
WBGene00007593	C14H10.3b.2	-0.364569	0.0367133
WBGene00007594	C15A7.1.1	0	0.0569431
WBGene00007597	C15A11.2.1	0	0.0744256
WBGene00007597	C15A11.2.2	0.333333	0.0744256
WBGene00007597	C15A11.2.3	0.049696	0.0744256
WBGene00007597	C15A11.2.4	-0.383029	0.0744256
WBGene00007601	C15C6.2a.1	0.333333	0.0669331
WBGene00007601	C15C6.2b.1	-0.333333	0.0669331
WBGene00007608	C15C8.6.1	0	0.0699301
WBGene00007614	C15H11.2a.1	-0.51649	0.0749251
WBGene00007614	C15H11.2b.1	0.51649	0.0749251
WBGene00007615	C15H11.5.1	0.074935	0.0879121
WBGene00007615	C15H11.5.2	-0.074935	0.0879121
WBGene00007631	C16C10.12a.1	0.333333	0.0559441
WBGene00007631	C16C10.12b.1	0	0.0559441
WBGene00007631	C16C10.12c.1	0	0.0559441
WBGene00007631	C16C10.12d.1	-0.333333	0.0559441
WBGene00007641	C17E4.1a.1	-0.333333	0.044955
WBGene00007641	C17E4.1b.1	0.333333	0.044955
WBGene00007647	C17E4.10a.1	-0.108213	0.038961
WBGene00007647	C17E4.10b.1	0.108213	0.038961
WBGene00007651	C17G1.4a.1	-0.112389	0.0789211
WBGene00007651	C17G1.4b.1	0.112389	0.0789211
WBGene00007658	C17H1.5.1	0	0.0894106
WBGene00007660	C17H1.7.1	0	0.0774226
WBGene00007681	C18D11.3.1	0.0625988	0.0499501
WBGene00007681	C18D11.3.2	-0.0625988	0.0499501
WBGene00007687	C18E9.7.1	0	0.0869131
WBGene00007694	C23H4.6a.1	-0.536673	0.0204795
WBGene00007694	C23H4.6b.1	0.536673	0.0204795
WBGene00007696	C24F3.1a.1	0.0379486	0.0784216
WBGene00007696	C24F3.1b.1	-0.0379486	0.0784216
WBGene00007698	C24F3.4a.1	-0.131133	0.0367133
WBGene00007698	C24F3.4c.1	0.118885	0.0367133
WBGene00007702	C24H11.5a.1	-0.0649026	0.0749251
WBGene00007702	C24H11.5b.1	0.0649026	0.0749251
WBGene00007703	C24H11.7a.1	-0.108067	0.0374625
WBGene00007703	C24H11.7b.1	0.108067	0.0374625
WBGene00007711	C25A1.12b.1	-0.121127	0.0579421
WBGene00007711	C25A1.12c.1	0.0870867	0.0679321
WBGene00007722	C25D7.15a.1	0.274387	0.0894106
WBGene00007722	C25D7.15b.1	-0.274387	0.0894106
WBGene00007723	C25F9.2.1	0	0.043956
WBGene00007725	C25F9.5.1	0.288808	0.0624376
WBGene00007725	C25F9.5.2	-0.288808	0.0624376
WBGene00007726	C25F9.6.1	0.333333	0.0914086
WBGene00007726	C25F9.6.2	-0.333333	0.0914086
WBGene00007729	C25G4.1.1	0	0.0944056
WBGene00007753	C27A7.1a.1	0.309837	0.0509491
WBGene00007753	C27A7.1d.1	-0.40604	0.0509491
WBGene00007758	C27A7.8a.1	0.170586	0.0724276
WBGene00007758	C27A7.8b.1	-0.170586	0.0724276
WBGene00007769	C27C7.7.1	0	0.0869131
WBGene00007776	C27C12.6.1	0	0.0719281
WBGene00007777	C27D8.1.1	0	0.0749251
WBGene00007778	C27D8.2.1	0	0.0874126
WBGene00007786	C27H6.4a.1	0.0514506	0.044955
WBGene00007786	C27H6.4b.1	-0.0467434	0.044955
WBGene00007800	C29A12.6a.1	-0.0216434	0.0569431
WBGene00007800	C29A12.6b.1	0.0216434	0.0569431
WBGene00007809	C29F4.3.1	0	0.0509491
WBGene00007811	C29F7.2a.1	-0.178343	0.0719281
WBGene00007811	C29F7.2b.1	0.178343	0.0719281
WBGene00007823	C30H6.5a.1	0.333333	0.0394605
WBGene00007823	C30H6.5b.1	-0.333333	0.0394605
WBGene00007829	C31A11.1.1	0	0.0584416
WBGene00007835	C31A11.7.1	0	0.0974026
WBGene00007866	C32H11.3.1	0	0.0864136
WBGene00007868	C32H11.5.1	0	0.0674326
WBGene00007894	C33D3.3.1	0	0.0759241
WBGene00007901	C33D9.8.1	-0.562065	0.0514486
WBGene00007901	C33D9.8.2	0.562065	0.0514486
WBGene00007918	C34C6.5c.1	-0.157105	0.0859141
WBGene00007918	C34C6.5d.1	0.151803	0.0859141
WBGene00007919	C34C6.7a.1	-0.257005	0.0614386
WBGene00007919	C34C6.7b.1	0.257005	0.0614386
WBGene00007924	C34C12.5.1	-0.220488	0.00599401
WBGene00007924	C34C12.5.2	0.220488	0.00599401
WBGene00007933	C34E7.3.1	0	0.0859141
WBGene00007938	C34F6.1.1	0	0.0669331
WBGene00007946	C35A5.2.1	0	0.0689311
WBGene00007951	C35A5.7.1	0	0.0874126
WBGene00007954	C35C5.2.1	0	0.043956
WBGene00007955	C35C5.3a.1	-0.061226	0.0794206
WBGene00007955	C35C5.3b.1	0.061226	0.0794206
WBGene00007973	C36B1.6a.1	-0.19272	0.0904096
WBGene00007973	C36B1.6b.1	0.19272	0.0904096
WBGene00007975	C36B1.8b.1	-0.0795102	0.0794206
WBGene00007975	C36B1.8c.1	0.0813322	0.0794206
WBGene00007977	C36B1.10.1	0	0.0799201
WBGene00007986	C36F7.5.1	0	0.0744256
WBGene00007994	C37E2.2a.1	0.333333	0.0809191
WBGene00007994	C37E2.2b	-0.333333	0.0809191
WBGene00007996	C38C6.3.1	0	0.0889111
WBGene00008010	C38D9.2.1	0	0.0749251
WBGene00008010	C38D9.2.2	0.268673	0.0749251
WBGene00008010	C38D9.2.3	0.026769	0.0749251
WBGene00008010	C38D9.2.4	-0.295442	0.0749251
WBGene00008018	C38H2.1a.1	-0.180147	0.0949051
WBGene00008018	C38H2.1b.1	0.180147	0.0949051
WBGene00008021	C39B10.1.1	0	0.0709291
WBGene00008031	C39E9.7.1	0.227976	0.0754246
WBGene00008031	C39E9.7.2	-0.227976	0.0754246
WBGene00008043	C40H1.8.1	0	0.0944056
WBGene00008045	C40H5.2a.1	-0.551387	0.0854146
WBGene00008045	C40H5.2b.1	0.295362	0.0854146
WBGene00008045	C40H5.2c.1	0.256025	0.0854146
WBGene00008066	C43D7.2.1	0	0.0729271
WBGene00008076	C43F9.9.1	0.175096	0.0894106
WBGene00008076	C43F9.9.2	-0.175096	0.0894106
WBGene00008077	C43F9.10.1	0	0.0889111
WBGene00008093	C44H4.1.1	0	0.0749251
WBGene00008096	C44H4.8.1	0	0.0784216
WBGene00008100	C44H9.5a.1	-0.24975	0.0674326
WBGene00008100	C44H9.5b.1	0.24975	0.0674326
WBGene00008102	C44H9.7a.1	-0.163122	0.0919081
WBGene00008102	C44H9.7b.1	0.163122	0.0919081
WBGene00008111	C46C2.3.1	0	0.0809191
WBGene00008117	C46F11.2b.1	0.0575715	0.0509491
WBGene00008117	C46F11.2b.2	-0.0485185	0.0509491
WBGene00008142	C47E8.3.1	0	0.0809191
WBGene00008143	C47E8.4a.1	-0.0782485	0.0704296
WBGene00008143	C47E8.4c.1	0.106417	0.0704296
WBGene00008146	C47E8.9a.1	0.333333	0.0699301
WBGene00008146	C47E8.9b.1	-0.333333	0.0699301
WBGene00008172	C48B4.9.1	-0.106487	0.028971
WBGene00008172	C48B4.9.2	0.106487	0.028971
WBGene00008192	C49C3.2	0	0.0779221
WBGene00008194	C49C3.4b.1	-0.0895308	0.0839161
WBGene00008194	C49C3.4c.1	0.125954	0.0839161
WBGene00008198	C49C3.8a.1	-0.198775	0.0559441
WBGene00008198	C49C3.8b.1	0.198775	0.0559441
WBGene00008237	C50F4.14a.1	-0.0795485	0.0624376
WBGene00008237	C50F4.14b.1	0.0795485	0.0624376
WBGene00008251	C51E3.5.1	0	0.0619381
WBGene00008271	C53B4.1.1	0	0.0674326
WBGene00008272	C53B4.2.1	0	0.0704296
WBGene00008275	C53B4.6a.1	-0.0837111	0.0914086
WBGene00008275	C53B4.6b.1	0.0837111	0.0914086
WBGene00008280	C53D6.3.1	0	0.0659341
WBGene00008292	C54C8.4.1	0	0.0604396
WBGene00008300	C54D10.5.1	0	0.0599401
WBGene00008339	C55A6.10b.1	0.0961132	0.0846653
WBGene00008339	C55A6.10c.1	-0.0946741	0.0846653
WBGene00008348	C56G7.3a.1	-0.176043	0.0839161
WBGene00008348	C56G7.3c.1	0.176043	0.0839161
WBGene00008368	D1053.3.1	-0.333333	0.0769231
WBGene00008368	D1053.3.2	0.333333	0.0769231
WBGene00008379	D1054.13a.1	0.135353	0.0619381
WBGene00008379	D1054.13b.1	-0.135353	0.0619381
WBGene00008421	D2030.12.1	-0.333333	0.0684316
WBGene00008421	D2030.12.2	0.333333	0.0684316
WBGene00008423	D2045.5.1	0	0.0519481
WBGene00008434	D2089.3.1	0	0.0889111
WBGene00008448	E01G4.6.1	0	0.047952
WBGene00008449	E01G6.1.1	0	0.0624376
WBGene00008460	E02H4.2a.1	-0.293465	0.0959041
WBGene00008460	E02H4.2b.1	0.293465	0.0959041
WBGene00008462	E02H4.4.1	0	0.0784216
WBGene00008481	E04D5.2.1	0	0.0879121
WBGene00008499	F01D5.9.1	0.333333	0.017982
WBGene00008499	F01D5.9.2	-0.333333	0.017982
WBGene00008503	F01G4.4a.1	-0.0635743	0.0749251
WBGene00008503	F01G4.4b.1	0.0635743	0.0749251
WBGene00008509	F01G10.6.1	0	0.0664336
WBGene00008513	F02A9.1.1	0	0.0784216
WBGene00008518	F02C12.4.1	0	0.0514486
WBGene00008529	F02E9.3.1	0	0.0749251
WBGene00008530	F02E9.5a.1	-0.14751	0.0194805
WBGene00008530	F02E9.5b.1	0.14751	0.0194805
WBGene00008541	F07A5.2.1	0	0.0739261
WBGene00008550	F07B10.4a.1	0.333333	0.0669331
WBGene00008550	F07B10.4b.1	-0.333333	0.0669331
WBGene00008559	F07H5.8.1	0	0.0569431
WBGene00008593	F08H9.5.1	0	0.0774226
WBGene00008599	F09A5.2a.1	0.186566	0.0944056
WBGene00008599	F09A5.2b.1	-0.186566	0.0944056
WBGene00008601	F09A5.4b.1	0.29659	0.045954
WBGene00008601	F09A5.4b.2	-0.328117	0.045954
WBGene00008602	F09B9.1a.1	0.29468	0.0784216
WBGene00008602	F09B9.1b.1	-0.29468	0.0784216
WBGene00008609	F09B12.5.1	0	0.0504496
WBGene00008613	F09C3.5.1	0	0.0709291
WBGene00008615	F09C6.1.1	0	0.0519481
WBGene00008616	F09C6.2.1	0	0.0644356
WBGene00008633	F10A3.3.1	0	0.0539461
WBGene00008652	F10D11.6a.1	-0.203758	0.047952
WBGene00008652	F10D11.6b.1	0.203758	0.047952
WBGene00008666	F10G8.8a.1	0.141829	0.0859141
WBGene00008666	F10G8.8b.1	-0.141829	0.0859141
WBGene00008678	F11A5.12.1	0	0.0664336
WBGene00008719	F11F1.7.1	0	0.0909091
WBGene00008720	F12F6.1.1	-0.0422703	0.0999001
WBGene00008720	F12F6.1.2	0.0422703	0.0999001
WBGene00008727	F13A7.12.1	0	0.0584416
WBGene00008732	F13B12.4a.1	0.333333	0.0609391
WBGene00008732	F13B12.4a.2	0	0.0609391
WBGene00008732	F13B12.4b	-0.333333	0.0609391
WBGene00008736	F13D2.2.1	0	0.0789211
WBGene00008737	F13D2.3.1	0	0.0704296
WBGene00008743	F13D12.9.1	-0.26112	0.0899101
WBGene00008743	F13D12.9.2	0.26112	0.0899101
WBGene00008746	F13E6.2.1	0	0.0789211
WBGene00008747	F13E6.3a.1	-0.248388	0.028971
WBGene00008747	F13E6.3b.1	0.248388	0.028971
WBGene00008762	F13G3.1.1	0	0.0824176
WBGene00008763	F13G3.3a.1	0.0780583	0.0784216
WBGene00008763	F13G3.3b.1	-0.0780583	0.0784216
WBGene00008774	F13H10.3c.1	0.109061	0.0759241
WBGene00008774	F13H10.3d.1	-0.104665	0.0759241
WBGene00008792	F14D7.5a.1	0	0.0829171
WBGene00008792	F14D7.5b.1	0	0.0829171
WBGene00008808	F14F4.1.1	0	0.0939061
WBGene00008843	F15A4.9.1	0	0.0939061
WBGene00008847	F15A4.13.1	0	0.0789211
WBGene00008850	F15B9.6.1	0	0.0839161
WBGene00008875	F15H10.8.1	0	0.0804196
WBGene00008891	F16H6.1.1	0	0.0444555
WBGene00008894	F16H6.4a.1	-0.165557	0.0854146
WBGene00008894	F16H6.4b.1	0.165557	0.0854146
WBGene00008916	F17C11.5.1	0	0.0809191
WBGene00008922	F17C11.11a.1	0.0907772	0.0729271
WBGene00008922	F17C11.11b.1	-0.0907772	0.0729271
WBGene00008923	F17C11.12a.1	-0.269117	0.028971
WBGene00008923	F17C11.12b.1	0.269117	0.028971
WBGene00008932	F18A11.5a.1	0.384391	0.0861638
WBGene00008932	F18A11.5a.2	-0.346836	0.0861638
WBGene00008944	F19B2.5.1	-0.136339	0.0224775
WBGene00008944	F19B2.5.3	0.177049	0.0224775
WBGene00008958	F19H6.3.1	0	0.0624376
WBGene00008970	F20C5.5.1	0	0.0929071
WBGene00008977	F20D1.7.1	0	0.0744256
WBGene00008988	F20G2.5.1	0	0.0874126
WBGene00008990	F20G4.1.1	0.138433	0.02997
WBGene00008990	F20G4.1.2	-0.138433	0.02997
WBGene00008994	F21A3.4.1	0	0.0549451
WBGene00009008	F21D5.3a.1	0.250895	0.026973
WBGene00009008	F21D5.3b.1	0.127069	0.0639361
WBGene00009008	F21D5.3c.1	-0.377965	0.011988
WBGene00009014	F21D5.9.1	0	0.0954046
WBGene00009015	F21D9.1.1	0	0.0804196
WBGene00009019	F21D9.5	0	0.0619381
WBGene00009020	F21D9.6	0	0.0939061
WBGene00009030	F21H7.4.1	0	0.0794206
WBGene00009031	F21H7.5.1	0	0.0514486
WBGene00009032	F21H7.10.1	0	0.0559441
WBGene00009048	F22B8.6a.1	-0.173618	0.0509491
WBGene00009048	F22B8.6b.1	0.173618	0.0509491
WBGene00009061	F22G12.1.1	0	0.0819181
WBGene00009063	F22G12.3.1	0	0.0804196
WBGene00009065	F22G12.5b.1	0.139429	0.0434565
WBGene00009065	F22G12.5c.1	-0.163447	0.0434565
WBGene00009070	F23A7.5.1	0	0.0749251
WBGene00009081	F23B12.4a.1	-0.248711	0.0404595
WBGene00009081	F23B12.4b.1	0.264646	0.0404595
WBGene00009084	F23B12.7.1	-0.0781539	0.0499501
WBGene00009084	F23B12.7.2	0.0781539	0.0499501
WBGene00009085	F23D12.1.1	0	0.0709291
WBGene00009095	F23H12.7a.1	0	0.0744256
WBGene00009095	F23H12.7b.1	0	0.0744256
WBGene00009100	F25B3.3a.1	0.0385252	0.0884116
WBGene00009100	F25B3.3b.1	-0.0385252	0.0884116
WBGene00009104	F25C8.1	0	0.0869131
WBGene00009109	F25D1.4.1	0	0.0799201
WBGene00009115	F25F2.1a.1	0	0.0959041
WBGene00009115	F25F2.1b.1	0	0.0959041
WBGene00009129	F25H5.7.1	0	0.0704296
WBGene00009139	F25H9.7a.1	-0.0479008	0.0959041
WBGene00009139	F25H9.7b.1	0.0479008	0.0959041
WBGene00009144	F26A3.6.1	0	0.0949051
WBGene00009146	F26C11.1.1	0.333333	0.0529471
WBGene00009146	F26C11.1.2	-0.333333	0.0529471
WBGene00009147	F26C11.3a.1	0	0.043956
WBGene00009147	F26C11.3b.1	0	0.043956
WBGene00009147	F26C11.3c.1	0	0.043956
WBGene00009147	F26C11.3d.1	0	0.043956
WBGene00009147	F26C11.3e	0	0.043956
WBGene00009147	F26C11.3f.1	0	0.043956
WBGene00009153	F26D2.15.1	0	0.0809191
WBGene00009155	F26D10.11.1	0	0.0749251
WBGene00009156	F26D10.12a.1	0.275501	0.0786713
WBGene00009156	F26D10.12b.1	-0.21515	0.0786713
WBGene00009162	F26E4.7a.1	-0.113078	0.0949051
WBGene00009162	F26E4.7b.1	0.113078	0.0949051
WBGene00009166	F26F2.1.1	0	0.0684316
WBGene00009173	F26H9.1a.1	-0.0931042	0.0539461
WBGene00009173	F26H9.1b.1	0.0931042	0.0539461
WBGene00009174	F26H9.2.1	0.0537556	0.0909091
WBGene00009174	F26H9.2.2	-0.0537556	0.0909091
WBGene00009180	F26H11.2f.1	-0.138705	0.0689311
WBGene00009180	F26H11.2j.1	-0.109733	0.0765901
WBGene00009180	F26H11.2q.1	0.0862155	0.0804196
WBGene00009180	F26H11.2r.3	0.136833	0.0689311
WBGene00009193	F27E5.3.1	0	0.045954
WBGene00009204	F28C6.4a.1	0.128567	0.0819181
WBGene00009204	F28C6.4a.2	-0.333813	0.041958
WBGene00009204	F28C6.4a.3	0.202661	0.0679321
WBGene00009207	F28C6.8a.1	-0.0785901	0.0549451
WBGene00009207	F28C6.8b.1	0.0785901	0.0549451
WBGene00009224	F28F8.7b	0.183839	0.0786713
WBGene00009224	F28F8.7c.1	-0.243233	0.0786713
WBGene00009226	F28G4.1.1	0	0.043956
WBGene00009231	F28H6.2a.1	0.238815	0.0904096
WBGene00009231	F28H6.2b	-0.238815	0.0904096
WBGene00009232	F28H6.3.1	0	0.0784216
WBGene00009239	F28H7.6.1	0	0.0869131
WBGene00009240	F28H7.7.1	0	0.0509491
WBGene00009257	F29G6.1.1	0	0.0634366
WBGene00009267	F30A10.10a.1	-0.0505183	0.0884116
WBGene00009267	F30A10.10b.1	0.0505183	0.0884116
WBGene00009278	F31B9.1.1	0	0.0614386
WBGene00009296	F31E9.3.1	0	0.0789211
WBGene00009305	F32A7.4a.1	0.0525424	0.0914086
WBGene00009305	F32A7.4b.1	-0.0525424	0.0914086
WBGene00009309	F32A11.4	0	0.0464535
WBGene00009322	F32B6.8a.1	-0.0590622	0.0754246
WBGene00009322	F32B6.8b.1	0.0590622	0.0754246
WBGene00009326	F32D8.1.1	0	0.0494505
WBGene00009331	F32D8.7a.1	-0.612905	0.0629371
WBGene00009331	F32D8.7b.1	0.612905	0.0629371
WBGene00009335	F32D8.13a.1	-0.224054	0.0584416
WBGene00009335	F32D8.13b.1	0.224054	0.0584416
WBGene00009343	F32H2.6.1	0	0.0784216
WBGene00009349	F32H5.3a.1	-0.246789	0.0799201
WBGene00009349	F32H5.3b.1	0.246789	0.0799201
WBGene00009356	F33A8.10.1	0	0.0509491
WBGene00009370	F33H2.7.1	0.125928	0.0944056
WBGene00009370	F33H2.7.2	-0.125928	0.0944056
WBGene00009371	F33H2.8a.1	-0.227414	0.0994006
WBGene00009371	F33H2.8b.1	0.227414	0.0994006
WBGene00009390	F35C5.1.1	0	0.0829171
WBGene00009414	F35E2.7	0	0.043956
WBGene00009416	F35E2.9.1	0	0.047952
WBGene00009426	F35E12.2a.1	-0.411961	0.0664336
WBGene00009426	F35E12.2b.1	0.411961	0.0664336
WBGene00009434	F35E12.10.1	-0.163986	0.013986
WBGene00009434	F35E12.10.2	0.163986	0.013986
WBGene00009451	F36A2.1b.1	0.15811	0.0799201
WBGene00009451	F36A2.1c.1	-0.101485	0.0986513
WBGene00009470	F36D3.4.1	0	0.0664336
WBGene00009480	F36F2.7.1	0	0.0914086
WBGene00009490	F36G9.14.1	0	0.0799201
WBGene00009497	F36H1.12.1	0	0.0914086
WBGene00009510	F37D6.4.1	0	0.0794206
WBGene00009517	F38A1.4.1	0	0.0689311
WBGene00009530	F38B2.3a.1	0.333333	0.0499501
WBGene00009530	F38B2.3b.1	-0.333333	0.0499501
WBGene00009531	F38B2.4a.1	-0.0495511	0.0939061
WBGene00009531	F38B2.4b	0.0495511	0.0939061
WBGene00009533	F38B7.2a.1	-0.333333	0.0509491
WBGene00009533	F38B7.2b.1	0.333333	0.0509491
WBGene00009541	F38E11.4.1	0	0.0524476
WBGene00009561	F39D8.3a.1	1	0
WBGene00009561	F39D8.3a.2	-0.333333	0.0929071
WBGene00009561	F39D8.3b.1	-0.666667	0.0929071
WBGene00009561	F39D8.3c.1	0	0.0929071
WBGene00009561	F39D8.3d.1	0	0.0929071
WBGene00009572	F40D4.13.1	0	0.0799201
WBGene00009583	F40F9.6a.1	-0.0624842	0.0809191
WBGene00009583	F40F9.6c.1	0.0681342	0.0809191
WBGene00009586	F40F9.10.1	0	0.0749251
WBGene00009597	F40G12.2.1	0	0.0899101
WBGene00009614	F41D3.9.1	0	0.0619381
WBGene00009619	F41E7.3.1	0	0.0709291
WBGene00009622	F41E7.6.1	0	0.0664336
WBGene00009641	F42G4.2.1	0	0.0674326
WBGene00009647	F43C1.1.1	0	0.0894106
WBGene00009674	F44A6.1a.1	0.0513485	0.0924076
WBGene00009674	F44A6.1b.1	-0.0513485	0.0924076
WBGene00009677	F44A6.5.1	0.430842	0.032967
WBGene00009677	F44A6.5.2	-0.430842	0.032967
WBGene00009678	F44D12.1a.1	-0.19078	0.0484515
WBGene00009678	F44D12.1b.1	0.19078	0.0484515
WBGene00009690	F44E5.3	0	0.0564436
WBGene00009698	F44F1.6a.1	0.323586	0.0689311
WBGene00009698	F44F1.6b.1	-0.323586	0.0689311
WBGene00009715	F44G4.6a.1	-0.310368	0.0779221
WBGene00009715	F44G4.6b.1	0.310368	0.0779221
WBGene00009739	F45H10.2.1	0.213159	0.003996
WBGene00009739	F45H10.2.2	-0.213159	0.003996
WBGene00009742	F45H10.5.1	0.00539809	0.0824176
WBGene00009742	F45H10.5.2	0.160494	0.0824176
WBGene00009742	F45H10.5.3	0	0.0824176
WBGene00009742	F45H10.5.4	-0.158586	0.0824176
WBGene00009742	F45H10.5.5	-0.00730661	0.0824176
WBGene00009743	F45H11.1a.1	0.206738	0.0729271
WBGene00009743	F45H11.1b.1	0.242336	0.0729271
WBGene00009743	F45H11.1b.2	-0.449075	0.0729271
WBGene00009773	F46B6.8.1	0	0.0574426
WBGene00009774	F46B6.9.1	0	0.0674326
WBGene00009786	F46F2.1	0	0.043956
WBGene00009793	F46F6.2c.1	0.208408	0.0619381
WBGene00009793	F46F6.2d.1	-0.13178	0.0989011
WBGene00009805	F47B8.4a.1	-0.333333	0.0759241
WBGene00009805	F47B8.4b.1	0.333333	0.0759241
WBGene00009810	F47B8.9a.1	0	0.0839161
WBGene00009810	F47B8.9b.1	0	0.0839161
WBGene00009819	F47B10.8a.1	0.333333	0.0509491
WBGene00009819	F47B10.8b.1	-0.333333	0.0509491
WBGene00009819	F47B10.8c.1	0	0.0509491
WBGene00009819	F47B10.8d.1	0	0.0509491
WBGene00009834	F47H4.1a.1	-0.0718068	0.0734266
WBGene00009834	F47H4.1b.1	0.0718068	0.0734266
WBGene00009835	F47H4.2a.1	0	0.041958
WBGene00009835	F47H4.2b.1	0	0.041958
WBGene00009838	F47H4.7a	1	0
WBGene00009838	F47H4.7b	-1	0
WBGene00009846	F48F5.2	0	0.043956
WBGene00009852	F48F7.7.1	0	0.0509491
WBGene00009854	F49A5.2.1	0	0.0854146
WBGene00009855	F49A5.3.1	0	0.0764236
WBGene00009872	F49C12.2.1	0	0.0704296
WBGene00009873	F49C12.3.1	0	0.0734266
WBGene00009879	F49C12.10.1	0	0.0854146
WBGene00009887	F49E2.4a.2	0.415697	0.0899101
WBGene00009887	F49E2.4b.1	0.450337	0.0899101
WBGene00009887	F49E2.4b.2	-0.906203	0.0899101
WBGene00009904	F49E12.12.1	0	0.0694306
WBGene00009908	F49H6.5a.1	0.333333	0.0749251
WBGene00009908	F49H6.5a.2	0	0.0749251
WBGene00009908	F49H6.5b.1	-0.333333	0.0749251
WBGene00009965	F53B7.2a.1	-0.666667	0.0604396
WBGene00009965	F53B7.2b.1	0.666667	0.0604396
WBGene00009971	F53C11.1a.1	-0.228502	0.035964
WBGene00009971	F53C11.1b.1	0.228502	0.035964
WBGene00009976	F53C11.7.1	0.093845	0.0974026
WBGene00009976	F53C11.7.2	-0.093845	0.0974026
WBGene00009978	F53E4.1a.1	-0.210169	0.021978
WBGene00009978	F53E4.1d.1	0.182272	0.021978
WBGene00009996	F53F4.14.1	0.187605	0.00999001
WBGene00009996	F53F4.14.2	-0.187605	0.00999001
WBGene00010003	F53F8.6a.1	0.240727	0.0919081
WBGene00010003	F53F8.6b.1	-0.240727	0.0919081
WBGene00010009	F53H4.4.1	-0.666667	0.0264735
WBGene00010009	F53H4.4.2	0.666667	0.0264735
WBGene00010019	F54B8.4a.1	0.311094	0.0424575
WBGene00010019	F54B8.4b.1	-0.311094	0.0424575
WBGene00010031	F54B11.8.1	0	0.0819181
WBGene00010035	F54C8.1.1	-0.666667	0.03996
WBGene00010035	F54C8.1.2	0.666667	0.03996
WBGene00010043	F54C9.7.1	0	0.0994006
WBGene00010060	F54E4.4.1	0	0.0829171
WBGene00010072	F54F12.1.1	0	0.043956
WBGene00010089	F55B12.4.1	0.255457	0.003996
WBGene00010089	F55B12.4.2	-0.255457	0.003996
WBGene00010092	F55C5.2	0	0.0684316
WBGene00010096	F55C5.7a.1	-0.038952	0.0864136
WBGene00010096	F55C5.7b.1	0.038952	0.0864136
WBGene00010104	F55C9.7.1	0	0.0779221
WBGene00010110	F55D12.1.1	-0.328224	0.0569431
WBGene00010110	F55D12.1.2	0.328224	0.0569431
WBGene00010111	F55D12.2a.1	-0.15613	0.0864136
WBGene00010111	F55D12.2b.1	0.15613	0.0864136
WBGene00010119	F55G7.1.1	0	0.0909091
WBGene00010122	F55G11.1.1	0	0.0654346
WBGene00010136	F55H12.5.1	-0.333333	0.0654346
WBGene00010136	F55H12.5.2	0	0.0654346
WBGene00010136	F55H12.5.3	0.333333	0.0654346
WBGene00010143	F56A12.2a.1	1	0
WBGene00010143	F56A12.2b.1	-1	0
WBGene00010157	F56G4.1.1	0	0.0494505
WBGene00010179	F57A8.4.1	0	0.0744256
WBGene00010197	F57C2.5b.1	-0.0712315	0.0906593
WBGene00010197	F57C2.5c.1	0.0614726	0.0906593
WBGene00010198	F57C2.6b.1	-0.107075	0.0554446
WBGene00010198	F57C2.6c.1	0.10829	0.0554446
WBGene00010200	F57C7.4.1	0	0.0664336
WBGene00010216	F57G8.7.1	0	0.0669331
WBGene00010239	F58B4.6.1	0.577124	0.0464535
WBGene00010239	F58B4.6.2	-0.577124	0.0464535
WBGene00010241	F58D2.2.1	0	0.0619381
WBGene00010243	F58D5.3.1	0	0.0789211
WBGene00010250	F58D12.3.1	0	0.0464535
WBGene00010259	F58E10.1b.1	-0.0832975	0.0861638
WBGene00010259	F58E10.1c.1	0.0827946	0.0861638
WBGene00010273	F58G6.2a.1	-0.265725	0.0739261
WBGene00010273	F58G6.2b.1	-0.333333	0.0739261
WBGene00010273	F58G6.2c.1	0.599058	0.0739261
WBGene00010279	F58G11.1a.1	0.0335981	0.0994006
WBGene00010279	F58G11.1b.1	-0.0335981	0.0994006
WBGene00010282	F58G11.4a.1	0.272387	0.0694306
WBGene00010282	F58G11.4b.1	-0.272387	0.0694306
WBGene00010286	F58H1.3a.1	-0.0720978	0.0744256
WBGene00010286	F58H1.3b	0.0720978	0.0744256
WBGene00010290	F58H1.7a.1	0.112413	0.0989011
WBGene00010290	F58H1.7b.1	-0.112413	0.0989011
WBGene00010293	F59A1.7.1	0.222836	0.0464535
WBGene00010293	F59A1.7.2	-0.222836	0.0464535
WBGene00010303	F59A2.3.1	0.0321083	0.0594406
WBGene00010303	F59A2.3.2	-0.0321083	0.0594406
WBGene00010304	F59A2.4a.1	-0.11307	0.0274725
WBGene00010304	F59A2.4b.1	0.11307	0.0274725
WBGene00010310	F59B2.8.1	0	0.0824176
WBGene00010313	F59B2.11	0	0.0679321
WBGene00010315	F59B2.13a.1	-0.255119	0.0769231
WBGene00010315	F59B2.13b.1	0.255119	0.0769231
WBGene00010320	F59B10.4a.1	-0.439267	0.0724276
WBGene00010320	F59B10.4b.1	0.439267	0.0724276
WBGene00010327	F59C6.8.1	0	0.0669331
WBGene00010329	F59D12.1.1	0	0.0779221
WBGene00010331	F59D12.3.1	0	0.0794206
WBGene00010344	F59F5.5.1	0	0.0799201
WBGene00010345	F59F5.7.1	0	0.0934066
WBGene00010349	H01G02.2.1	0	0.0539461
WBGene00010361	H03G16.5.1	0	0.0924076
WBGene00010375	H09F14.1a.1	-0.128486	0.0929071
WBGene00010375	H09F14.1b.1	0.197043	0.0929071
WBGene00010375	H09F14.1c.1	-0.0685565	0.0929071
WBGene00010375	H09F14.1d.1	0	0.0929071
WBGene00010375	H09F14.1e.1	0	0.0929071
WBGene00010385	H12D21.9a.1	-0.333333	0.0784216
WBGene00010385	H12D21.9b.1	0.333333	0.0784216
WBGene00010386	H12D21.10a.1	-0.297218	0.043956
WBGene00010386	H12D21.10b.1	0.297218	0.043956
WBGene00010391	H12I19.4a.1	0	0.045954
WBGene00010391	H12I19.4b	0	0.045954
WBGene00010418	H27A22.1a.1	0.107457	0.043956
WBGene00010418	H27A22.1b.1	-0.107457	0.043956
WBGene00010442	JC8.12a.1	0.666667	0.0564436
WBGene00010442	JC8.12b.1	-0.666667	0.0564436
WBGene00010453	K01B6.1.1	-0.666667	0.0344655
WBGene00010453	K01B6.1.3	0.666667	0.0344655
WBGene00010457	K01C8.2.1	0	0.0519481
WBGene00010460	K01C8.8.1	0	0.0814186
WBGene00010485	K01H12.2.1	0	0.0654346
WBGene00010487	K02A11.2.1	0	0.0569431
WBGene00010497	K02B12.4a.1	-0.253226	0.0869131
WBGene00010497	K02B12.4b.1	0.253226	0.0869131
WBGene00010510	K02E11.1.1	0	0.043956
WBGene00010521	K03A11.4.1	0	0.045954
WBGene00010551	K04B12.3a.1	-0.111662	0.0629371
WBGene00010551	K04B12.3c.1	0.150051	0.0629371
WBGene00010552	K04C1.2a.1	0.157518	0.0559441
WBGene00010552	K04C1.2b.1	-0.157518	0.0559441
WBGene00010563	K04G2.4.1	0	0.0874126
WBGene00010564	K04G2.5a.1	0.226182	0.027972
WBGene00010564	K04G2.5a.2	-0.142895	0.048951
WBGene00010566	K04G2.7a.1	0	0.0879121
WBGene00010566	K04G2.7b.1	0	0.0879121
WBGene00010578	K04H8.3.1	0	0.0954046
WBGene00010584	K05C4.8.1	0	0.0884116
WBGene00010585	K05C4.9a.1	-0.478718	0.0579421
WBGene00010585	K05C4.9b.1	0.478718	0.0579421
WBGene00010589	K05D4.4.1	0	0.0899101
WBGene00010605	K06G5.1.1	0.323826	0
WBGene00010605	K06G5.1.2	-0.323826	0
WBGene00010614	K07A1.7.1	0	0.0814186
WBGene00010642	K07G5.3.1	0	0.0909091
WBGene00010643	K07G5.4.1	0	0.0499501
WBGene00010647	K08C7.4.1	0	0.0854146
WBGene00010660	K08D8.6a.1	0.0826202	0.0594406
WBGene00010660	K08D8.6b.1	-0.0826202	0.0594406
WBGene00010666	K08E4.2a.1	-0.200647	0.0144855
WBGene00010666	K08E4.2b.1	0.200647	0.0144855
WBGene00010667	K08E4.3a.1	-0.134583	0.0494505
WBGene00010667	K08E4.3b.1	0.134583	0.0494505
WBGene00010681	K08F8.1a.1	0.139051	0.02997
WBGene00010681	K08F8.1b.1	-0.20219	0.024975
WBGene00010684	K08F9.1a.1	-0.40626	0.0679321
WBGene00010684	K08F9.1b.1	0.40626	0.0679321
WBGene00010707	K09A11.4.1	0	0.0674326
WBGene00010708	K09A11.5.1	0	0.0669331
WBGene00010713	K09B11.9a.1	0.069143	0.0864136
WBGene00010713	K09B11.9b.1	-0.069143	0.0864136
WBGene00010716	K09C8.4.1	0	0.0589411
WBGene00010720	K09E4.2a.1	-0.101341	0.0629371
WBGene00010720	K09E4.2b.1	0.101341	0.0629371
WBGene00010722	K09E4.4.1	-0.333333	0.0914086
WBGene00010722	K09E4.4.2	0.333333	0.0914086
WBGene00010768	K11D2.1a.2	-0.427088	0.0367133
WBGene00010768	K11D2.1b.1	0.464466	0.0367133
WBGene00010779	K11H3.2.1	0	0.0809191
WBGene00010782	K11H3.5a.1	0.333333	0.0929071
WBGene00010782	K11H3.5b	-0.333333	0.0929071
WBGene00010792	K12G11.6.1	0	0.0854146
WBGene00010794	LLC1.3a.1	-0.0598736	0.020979
WBGene00010794	LLC1.3b.1	0.0598736	0.020979
WBGene00010830	M02G9.1a.1	0.285073	0.0649351
WBGene00010830	M02G9.1b.1	-0.285073	0.0649351
WBGene00010837	M03B6.5.1	0	0.0874126
WBGene00010839	M03C11.2.1	-0.190643	0.012987
WBGene00010839	M03C11.2.2	0.190643	0.012987
WBGene00010849	M04B2.7a.1	0.204927	0.0974026
WBGene00010849	M04B2.7b.1	0.0268068	0.0974026
WBGene00010849	M04B2.7b.2	0.101599	0.0974026
WBGene00010849	M04B2.7c.1	0	0.0974026
WBGene00010849	M04B2.7d.1	0	0.0974026
WBGene00010849	M04B2.7e	0	0.0974026
WBGene00010849	M04B2.7f.1	-0.333333	0.0974026
WBGene00010849	M04B2.7g.1	0	0.0974026
WBGene00010849	M04B2.7h.1	0	0.0974026
WBGene00010849	M04B2.7i.1	0	0.0974026
WBGene00010849	M04B2.7j.1	0	0.0974026
WBGene00010849	M04B2.7k.1	0	0.0974026
WBGene00010855	M04C7.4.1	0	0.0529471
WBGene00010856	M04C9.1a.1	0.382398	0.0504496
WBGene00010856	M04C9.1b.1	-0.382398	0.0504496
WBGene00010858	M04C9.3a.1	0.111233	0.0799201
WBGene00010858	M04C9.3b.1	-0.111233	0.0799201
WBGene00010868	M04G12.4a.1	0.239111	0.0959041
WBGene00010868	M04G12.4b.1	-0.260094	0.0959041
WBGene00010871	M05B5.3a.1	-0.333333	0.0794206
WBGene00010871	M05B5.3b.1	0.333333	0.0794206
WBGene00010871	M05B5.3c.1	0	0.0794206
WBGene00010878	M05D6.5a.1	-0.110773	0.0454545
WBGene00010878	M05D6.5b.1	0.110773	0.0454545
WBGene00010893	M28.1.1	0	0.0889111
WBGene00010898	M28.7.1	0	0.0899101
WBGene00010906	M88.3.1	0	0.0704296
WBGene00010920	M117.4.1	0	0.0654346
WBGene00010921	M117.5	0	0.0809191
WBGene00010922	M142.5a.1	0.0798572	0.0684316
WBGene00010922	M142.5b.1	-0.0798572	0.0684316
WBGene00010936	M163.2a.1	0.333333	0.0644356
WBGene00010936	M163.2b.1	-0.333333	0.0644356
WBGene00010948	M195.2a.1	0	0.0784216
WBGene00010948	M195.2b.1	0.931258	0.0784216
WBGene00010948	M195.2c.1	-0.53811	0.0784216
WBGene00010948	M195.2d.1	-0.393148	0.0784216
WBGene00010984	R03A10.4a.1	-0.206016	0.032967
WBGene00010984	R03A10.4b.1	0.206016	0.032967
WBGene00010986	R03A10.6.1	0	0.048951
WBGene00010990	R03D7.4.1	-0.0988114	0.0304695
WBGene00010990	R03D7.4.2	0.0988114	0.0304695
WBGene00010991	R03D7.5a.1	-0.595154	0.0574426
WBGene00010991	R03D7.5b.1	0.595154	0.0574426
WBGene00010999	R03G8.4	0	0.0829171
WBGene00011004	R04B5.6.1	0	0.0889111
WBGene00011041	R05H5.7.1	0	0.0804196
WBGene00011050	R06A4.8.1	0.057207	0.0899101
WBGene00011050	R06A4.8.2	-0.057207	0.0899101
WBGene00011075	R07A4.4.1	0	0.0684316
WBGene00011081	R07B1.9.1	0	0.0854146
WBGene00011092	R07B7.8.1	0.146664	0.0814186
WBGene00011092	R07B7.8.2	-0.146664	0.0814186
WBGene00011097	R07B7.13a.1	-0.180113	0.0819181
WBGene00011097	R07B7.13b.1	0.180113	0.0819181
WBGene00011098	R07B7.14.1	0	0.0744256
WBGene00011099	R07B7.15.1	0	0.0779221
WBGene00011101	R07D5.2.1	0	0.0789211
WBGene00011102	R07E3.1a.1	-0.131947	0.043956
WBGene00011102	R07E3.1b.1	0.131947	0.043956
WBGene00011104	R07E3.3a.1	-0.149965	0.0899101
WBGene00011104	R07E3.3b.1	0.149965	0.0899101
WBGene00011121	R07E5.17.1	0	0.0779221
WBGene00011122	R07H5.2a.1	-0.106963	0.0352148
WBGene00011122	R07H5.2c.1	0.0993982	0.0352148
WBGene00011129	R07H5.9.1	0	0.0914086
WBGene00011137	R08A2.7.1	0	0.0799201
WBGene00011165	R09D1.9	0	0.0609391
WBGene00011171	R09E10.1.1	-0.30373	0.0634366
WBGene00011171	R09E10.1.2	0.30373	0.0634366
WBGene00011176	R09E10.6.1	0	0.0554446
WBGene00011209	R10E8.3.1	0	0.0819181
WBGene00011213	R10E8.8.1	-0.611162	0.020979
WBGene00011213	R10E8.8.2	0.611162	0.020979
WBGene00011214	R10E9.2.1	0	0.0554446
WBGene00011232	R11A5.4a.1	-0.0229856	0.0942807
WBGene00011232	R11A5.4a.2	0.029174	0.0942807
WBGene00011232	R11A5.4c.1	0.0825738	0.0337163
WBGene00011232	R11A5.4d.1	-0.0804666	0.0337163
WBGene00011236	R11A8.1a.1	0.111164	0.0524476
WBGene00011236	R11A8.1b.1	-0.111164	0.0524476
WBGene00011238	R11A8.3.1	0	0.0679321
WBGene00011251	R11H6.3a.1	0.160524	0.0634366
WBGene00011251	R11H6.3b.1	0.172809	0.0634366
WBGene00011251	R11H6.3c.1	-0.333333	0.0634366
WBGene00011252	R11H6.4a.1	-0.229918	0.0854146
WBGene00011252	R11H6.4b.1	0.170767	0.0854146
WBGene00011260	R13G10.4.1	0	0.0494505
WBGene00011261	R13H4.1.1	0	0.0499501
WBGene00011265	R13H4.7a.1	0	0.0609391
WBGene00011265	R13H4.7b.1	0	0.0609391
WBGene00011269	R17.3b.1	-0.331886	0.0307193
WBGene00011269	R17.3c.1	0.365195	0.0307193
WBGene00011287	R90.5a.1	-0.132489	0.0949051
WBGene00011287	R90.5b.1	-0.143773	0.0949051
WBGene00011287	R90.5c.1	0.276262	0.0949051
WBGene00011288	R102.1.1	0	0.0794206
WBGene00011297	R102.10.1	0	0.0749251
WBGene00011300	R107.5a.1	-0.16115	0.00649351
WBGene00011300	R107.5b.1	0.16115	0.00649351
WBGene00011313	T01B7.8.1	0	0.0784216
WBGene00011321	T01C3.4.1	0	0.0834166
WBGene00011323	T01C3.8a.1	-0.082412	0.0654346
WBGene00011323	T01C3.8b.1	0.082412	0.0654346
WBGene00011369	T02C12.4	0	0.0674326
WBGene00011371	T02D1.4.1	0	0.0644356
WBGene00011380	T02E1.8a.1	0.509439	0.0294705
WBGene00011380	T02E1.8b.1	-0.509439	0.0294705
WBGene00011382	T02E9.3a.1	-0.406457	0.0639361
WBGene00011382	T02E9.3b.1	0.406457	0.0639361
WBGene00011422	T04B2.3a.1	0.152943	0.0784216
WBGene00011422	T04B2.3b.1	-0.152943	0.0784216
WBGene00011429	T04C12.7.1	0	0.0809191
WBGene00011447	T04F8.9.1	0	0.0854146
WBGene00011453	T04H1.8.1	0	0.0509491
WBGene00011456	T05A1.5a.1	-0.666667	0.047952
WBGene00011456	T05A1.5b.1	0.666667	0.047952
WBGene00011462	T05A10.5a.1	-0.40979	0.0769231
WBGene00011462	T05A10.5b.1	0.40979	0.0769231
WBGene00011462	T05A10.5c.1	0	0.0769231
WBGene00011468	T05C12.4.1	0	0.0569431
WBGene00011471	T05C12.8.1	0	0.0794206
WBGene00011488	T05F1.1a.1	0.0426889	0.0814186
WBGene00011488	T05F1.1b.1	-0.0426889	0.0814186
WBGene00011494	T05F1.9.1	0	0.0814186
WBGene00011495	T05F1.11.1	0	0.0819181
WBGene00011509	T05H10.4a.1	0.109793	0.032967
WBGene00011509	T05H10.4b.1	-0.109793	0.032967
WBGene00011510	T05H10.6a.1	-0.113436	0.03996
WBGene00011510	T05H10.6a.2	0.0848381	0.03996
WBGene00011520	T06C12.13a.1	0.37942	0.0599401
WBGene00011520	T06C12.13b.1	-0.37942	0.0599401
WBGene00011529	T06D8.9.1	-0.0510583	0.0849151
WBGene00011529	T06D8.9.2	0.0510583	0.0849151
WBGene00011530	T06D8.10.1	0	0.0794206
WBGene00011537	T06E4.10.1	0	0.0754246
WBGene00011539	T06E6.5.1	0	0.0499501
WBGene00011545	T06G6.3a.1	0	0.0499501
WBGene00011545	T06G6.3b.1	0	0.0499501
WBGene00011546	T06G6.4.1	0	0.0844156
WBGene00011593	T07G12.2.1	0	0.0789211
WBGene00011594	T07G12.3.1	0	0.0664336
WBGene00011624	T08G5.3a.1	-0.204117	0.0884116
WBGene00011624	T08G5.3b.1	0.204117	0.0884116
WBGene00011630	T08G11.3.1	0	0.0669331
WBGene00011631	T08G11.4a.1	-0.0521394	0.0959041
WBGene00011631	T08G11.4b.1	0.0521394	0.0959041
WBGene00011639	T09A5.12.1	-0.131372	0.02997
WBGene00011639	T09A5.12.2	0.131372	0.02997
WBGene00011643	T09B9.2.1	0	0.0529471
WBGene00011660	T09E11.11	0	0.0804196
WBGene00011673	T10B9.3.1	0	0.0754246
WBGene00011674	T10B9.4.1	0	0.0619381
WBGene00011677	T10B9.8.1	0.382615	0.0739261
WBGene00011677	T10B9.8.2	-0.382615	0.0739261
WBGene00011682	T10B10.5.1	0	0.0799201
WBGene00011688	T10C6.6a.1	0.13829	0.0639361
WBGene00011688	T10C6.6a.2	-0.148772	0.0639361
WBGene00011707	T11B7.2a.1	0.297213	0.0989011
WBGene00011707	T11B7.2b.1	-0.297213	0.0989011
WBGene00011717	T11G6.2a.1	0.678398	0.000999001
WBGene00011717	T11G6.2b.1	-0.678398	0.000999001
WBGene00011731	T12D8.3.1	-0.233487	0.00599401
WBGene00011731	T12D8.3.2	0.233487	0.00599401
WBGene00011748	T13F2.9	0	0.0794206
WBGene00011754	T13F3.7.1	0	0.0754246
WBGene00011756	T13H5.2a.1	0.275623	0.0499501
WBGene00011756	T13H5.2b.1	-0.275623	0.0499501
WBGene00011757	T13H5.3.1	0	0.0854146
WBGene00011762	T13H10.2.1	0	0.0864136
WBGene00011763	T14B1.1.1	0.391291	0.0629371
WBGene00011763	T14B1.1.2	-0.417857	0.0629371
WBGene00011772	T14G8.4.1	0	0.0849151
WBGene00011796	T16G1.2a.1	0	0.0849151
WBGene00011796	T16G1.2b.1	0	0.0849151
WBGene00011798	T16G1.4.1	0	0.0824176
WBGene00011799	T16G1.5.1	0	0.0579421
WBGene00011802	T16G1.9.1	-0.106519	0.0899101
WBGene00011802	T16G1.9.2	0.106519	0.0899101
WBGene00011810	T16G12.9a.1	-0.326317	0.0809191
WBGene00011810	T16G12.9c.1	0.326317	0.0809191
WBGene00011828	T19A6.3a.1	0.0473196	0.0944056
WBGene00011828	T19A6.3b.1	-0.0473196	0.0944056
WBGene00011846	T19H5.1a.1	-0.333333	0.0879121
WBGene00011846	T19H5.1b.1	0.333333	0.0879121
WBGene00011850	T20B3.1a.1	0.231323	0.0784216
WBGene00011850	T20B3.1b.1	-0.231323	0.0784216
WBGene00011868	T20G5.4a.1	-0.19787	0.0624376
WBGene00011868	T20G5.4b.1	0.19787	0.0624376
WBGene00011895	T21C9.9.1	0	0.0779221
WBGene00011896	T21C9.11.1	0	0.0759241
WBGene00011906	T22A3.2a.1	-0.12965	0.0894106
WBGene00011906	T22A3.2b.1	0.12965	0.0894106
WBGene00011926	T22C8.5.1	0	0.0809191
WBGene00011927	T22C8.6.1	0	0.0869131
WBGene00011938	T22H6.2a.1	-0.151288	0.0719281
WBGene00011938	T22H6.2b.1	0.151288	0.0719281
WBGene00011939	T23B5.1a.1	-0.0526874	0.0739261
WBGene00011939	T23B5.1b.1	0.0526874	0.0739261
WBGene00011951	T23F6.3a.1	-0.310906	0.0869131
WBGene00011951	T23F6.3b.1	0.310906	0.0869131
WBGene00011951	T23F6.3c.1	0	0.0869131
WBGene00011955	T23F11.3a.1	0.195861	0.0874126
WBGene00011955	T23F11.3b.1	-0.195861	0.0874126
WBGene00011970	T23G11.5a.1	-0.098508	0.0599401
WBGene00011970	T23G11.5b.1	0.098508	0.0599401
WBGene00011973	T23G11.10.1	0	0.0684316
WBGene00012003	T24H10.5.1	0	0.0874126
WBGene00012009	T25B9.3a.1	-0.496571	0.0674326
WBGene00012009	T25B9.3b.1	0.496571	0.0674326
WBGene00012027	T25E12.12.1	0	0.0919081
WBGene00012070	T26H5.8.1	0.666667	0.038961
WBGene00012070	T26H5.8.2	-0.666667	0.038961
WBGene00012084	T27D1.3.1	0	0.0824176
WBGene00012084	T27D1.3.2	0	0.0824176
WBGene00012085	T27D12.1a.1	-0.121249	0.0689311
WBGene00012085	T27D12.1b.1	0.121249	0.0689311
WBGene00012102	T27F6.1.1	0	0.0619381
WBGene00012114	T28B8.3a.1	0.333333	0.042957
WBGene00012114	T28B8.3b.1	-0.333333	0.042957
WBGene00012116	T28B8.5.1	0	0.0684316
WBGene00012126	T28D6.6a.1	-0.0559046	0.0639361
WBGene00012126	T28D6.6b.1	0.0559046	0.0639361
WBGene00012131	T28F3.5a.1	0.146307	0.0899101
WBGene00012131	T28F3.5b.1	-0.146307	0.0899101
WBGene00012132	T28F3.6.1	0	0.0844156
WBGene00012135	T28F3.9.1	0	0.0579421
WBGene00012137	T28F4.2.1	0	0.0504496
WBGene00012138	T28F4.3.1	0.333333	0.0629371
WBGene00012138	T28F4.3.2	-0.333333	0.0629371
WBGene00012140	T28F4.5.1	-0.0517326	0.0334665
WBGene00012140	T28F4.5.2	0.0517326	0.0334665
WBGene00012155	VW02B12L.2.1	0.333333	0.0604396
WBGene00012155	VW02B12L.2.2	-0.333333	0.0604396
WBGene00012162	VZC374L.1a.1	0.333333	0.0754246
WBGene00012162	VZC374L.1b.1	-0.333333	0.0754246
WBGene00012175	W01C9.1.1	0	0.0794206
WBGene00012189	W02A2.4	0	0.0484515
WBGene00012199	W02B8.3.1	0	0.0759241
WBGene00012204	W02B12.9b.1	-0.137492	0.0529471
WBGene00012204	W02B12.9d.1	0.128076	0.0529471
WBGene00012208	W02D9.2a.1	-0.12446	0.0284715
WBGene00012208	W02D9.2c.1	0.123564	0.0284715
WBGene00012219	W03C9.1.1	0	0.0774226
WBGene00012230	W03H9.4a.1	-0.0653176	0.0786713
WBGene00012230	W03H9.4c.1	0.0772772	0.0786713
WBGene00012242	W04D2.2a.1	0	0.0519481
WBGene00012242	W04D2.2b	0.333333	0.0519481
WBGene00012242	W04D2.2c.1	-0.333333	0.0519481
WBGene00012255	W04G3.1a.1	-0.381095	0.0499501
WBGene00012255	W04G3.1b.1	0.381095	0.0499501
WBGene00012265	W04G5.4.1	0	0.0749251
WBGene00012275	W05B5.2.1	0	0.0619381
WBGene00012282	W05E10.5a.1	0.385712	0.0789211
WBGene00012282	W05E10.5b.1	-0.385712	0.0789211
WBGene00012282	W05E10.5c.1	0	0.0789211
WBGene00012295	W06B3.1.1	-0.228557	0.0574426
WBGene00012295	W06B3.1.2	0.228557	0.0574426
WBGene00012297	W06D4.3.1	0	0.0624376
WBGene00012307	W06F12.3.1	0	0.0474525
WBGene00012308	W06G6.1.1	0	0.0794206
WBGene00012322	W07A12.4a.1	-0.562865	0.0999001
WBGene00012322	W07A12.4d.1	0.562865	0.0999001
WBGene00012332	W07G1.5a.1	-0.333333	0.0774226
WBGene00012332	W07G1.5b.1	0.333333	0.0774226
WBGene00012340	W08D2.3a.1	-0.333333	0.0519481
WBGene00012340	W08D2.3c.1	0.333333	0.0519481
WBGene00012344	W08E3.3a.1	-0.087232	0.0262238
WBGene00012344	W08E3.3b.1	0.087232	0.0262238
WBGene00012345	W08E3.4a.1	0.333333	0.0799201
WBGene00012345	W08E3.4b.1	-0.333333	0.0799201
WBGene00012353	W09C5.7a.1	-0.116503	0.0599401
WBGene00012353	W09C5.7c.1	0.0988215	0.0599401
WBGene00012359	W09D10.1.1	0.0557934	0.0879121
WBGene00012359	W09D10.1.2	-0.0557934	0.0879121
WBGene00012364	W09D12.1a.1	-0.118538	0.046953
WBGene00012364	W09D12.1b.1	0.118538	0.046953
WBGene00012370	W09G3.7a.1	-0.105934	0.0684316
WBGene00012370	W09G3.7b.1	0.105934	0.0684316
WBGene00012372	W09H1.1a.1	0.0765299	0.0689311
WBGene00012372	W09H1.1b.1	0	0.0689311
WBGene00012372	W09H1.1c.1	0.666667	0.0689311
WBGene00012372	W09H1.1d.1	-0.743197	0.0689311
WBGene00012391	Y6B3B.7a.1	0.150128	0.0794206
WBGene00012391	Y6B3B.7a.2	0	0.0794206
WBGene00012391	Y6B3B.7b.1	0	0.0794206
WBGene00012391	Y6B3B.7b.2	-0.150128	0.0794206
WBGene00012404	Y6G8.2a.1	-0.153988	0.0969031
WBGene00012404	Y6G8.2b	0.324294	0.0969031
WBGene00012404	Y6G8.2c	-0.170306	0.0969031
WBGene00012426	Y11D7A.1	0	0.0669331
WBGene00012432	Y11D7A.8.1	0	0.0849151
WBGene00012434	Y11D7A.10a.1	0.0211922	0.0984016
WBGene00012434	Y11D7A.10c.1	-0.0372687	0.0984016
WBGene00012434	Y11D7A.10d.1	0.0160764	0.0984016
WBGene00012441	Y15E3A.2.1	0	0.0824176
WBGene00012470	Y17G7B.19	0	0.0454545
WBGene00012486	Y18D10A.21.1	0	0.0754246
WBGene00012491	Y20C6A.1a.1	-0.391834	0.0704296
WBGene00012491	Y20C6A.1b.1	0.391834	0.0704296
WBGene00012522	Y32B12B.2a.1	-0.0905219	0.0734266
WBGene00012522	Y32B12B.2b.1	0.100135	0.0734266
WBGene00012524	Y32B12B.4a.1	-0.129683	0.0959041
WBGene00012526	Y32B12C.3	0	0.0754246
WBGene00012562	Y37H2A.1a.1	-0.115502	0.030969
WBGene00012562	Y37H2A.1b.1	0.115502	0.030969
WBGene00012565	Y37H2A.5a.1	-0.0630827	0.0819181
WBGene00012565	Y37H2A.5b.1	0.0630827	0.0819181
WBGene00012573	Y37H2C.1	0	0.0594406
WBGene00012577	Y37H9A.2	0	0.0879121
WBGene00012594	Y38E10A.16.1	0	0.0829171
WBGene00012595	Y38E10A.17.1	0	0.0569431
WBGene00012596	Y38E10A.18.1	0	0.0544456
WBGene00012607	Y38F1A.4.1	0	0.0659341
WBGene00012608	Y38F1A.6.1	-0.0808022	0.0769231
WBGene00012608	Y38F1A.6.2	0.0627653	0.0769231
WBGene00012615	Y38H6C.1a.1	-0.042641	0.034965
WBGene00012615	Y38H6C.1b.1	0.042641	0.034965
WBGene00012626	Y38H6C.14.1	0	0.0989011
WBGene00012632	Y38H6C.20.1	0	0.0799201
WBGene00012633	Y38H6C.21a	-0.370411	0.0539461
WBGene00012633	Y38H6C.21b.1	0.370411	0.0539461
WBGene00012635	Y38H8A.1.1	0	0.0739261
WBGene00012637	Y38H8A.3.1	0	0.0559441
WBGene00012647	Y39A1A.8a.1	-0.324157	0.0254745
WBGene00012647	Y39A1A.8a.2	0.324157	0.0254745
WBGene00012665	Y39B6A.2a.1	-0.0476687	0.0739261
WBGene00012665	Y39B6A.2b.1	0.0476687	0.0739261
WBGene00012666	Y39B6A.3a.1	0.05473	0.0899101
WBGene00012666	Y39B6A.3b.1	-0.05473	0.0899101
WBGene00012671	Y39B6A.9.1	0	0.0809191
WBGene00012688	Y39B6A.29a.1	0	0.0644356
WBGene00012688	Y39B6A.29b.1	0	0.0644356
WBGene00012697	Y39B6A.39a.1	-0.0806117	0.0364635
WBGene00012697	Y39B6A.39b.1	0.0806117	0.0364635
WBGene00012703	Y39B6A.47a.1	-0.314908	0.0609391
WBGene00012703	Y39B6A.47b.1	0.314908	0.0609391
WBGene00012719	Y39E4B.10a.1	-0.0597248	0.0924076
WBGene00012719	Y39E4B.10b.1	0.0597248	0.0924076
WBGene00012726	Y39G8B.5.1	0	0.0724276
WBGene00012745	Y40H7A.7	0	0.0774226
WBGene00012758	Y41C4A.12a.1	-0.1794	0.0724276
WBGene00012758	Y41C4A.12b.1	0.1794	0.0724276
WBGene00012779	Y42A5A.4a.1	0.226922	0.0709291
WBGene00012779	Y42A5A.4b.1	-0.226922	0.0709291
WBGene00012779	Y42A5A.4c.1	0	0.0709291
WBGene00012813	Y43F8B.2e.1	0.222448	0.0194805
WBGene00012813	Y43F8B.2f.1	-0.26063	0.0194805
WBGene00012814	Y43F8B.3a.1	0	0.0809191
WBGene00012814	Y43F8B.3b.1	-0.0869783	0.0809191
WBGene00012814	Y43F8B.3c.1	0	0.0809191
WBGene00012814	Y43F8B.3d.1	-0.0121687	0.0809191
WBGene00012814	Y43F8B.3e.1	-0.0604751	0.0809191
WBGene00012814	Y43F8B.3f.1	0.0357277	0.0809191
WBGene00012814	Y43F8B.3g.1	0.0600123	0.0809191
WBGene00012814	Y43F8B.3h.1	0.0638821	0.0809191
WBGene00012824	Y43F8B.14.1	0	0.0809191
WBGene00012827	Y43F8C.5.1	0	0.0514486
WBGene00012855	Y44A6D.5.1	0	0.0474525
WBGene00012883	Y45F10D.2.1	0	0.0829171
WBGene00012890	Y45F10D.11a.1	0.112568	0.0779221
WBGene00012890	Y45F10D.11b.1	-0.112568	0.0779221
WBGene00012907	Y46G5A.17.1	0.137065	0.0104895
WBGene00012907	Y46G5A.17.2	-0.137065	0.0104895
WBGene00012914	Y46G5A.24.1	0	0.0794206
WBGene00012915	Y46G5A.26a.1	0	0.0864136
WBGene00012915	Y46G5A.26b.1	0	0.0864136
WBGene00012924	Y47D3A.5	0	0.0814186
WBGene00012940	Y47D3B.3.1	0	0.0499501
WBGene00012946	Y47H9B.2.1	0	0.0754246
WBGene00012947	Y47H9C.1.1	0	0.0804196
WBGene00012962	Y48A6B.1.1	0	0.0789211
WBGene00012969	Y48A6B.8.1	0	0.0714286
WBGene00012983	Y48B6A.12.1	0.0590056	0.0694306
WBGene00012983	Y48B6A.12.2	-0.0590056	0.0694306
WBGene00012994	Y48C3A.12a.1	-0.0835062	0.0889111
WBGene00012994	Y48C3A.12b.1	0.0835062	0.0889111
WBGene00013028	Y49A10A.1.1	0	0.0464535
WBGene00013043	Y49E10.24.1	0	0.0644356
WBGene00013073	Y51A2D.4.1	0	0.0774226
WBGene00013076	Y51A2D.8.1	0	0.0484515
WBGene00013088	Y51B9A.6a.1	0	0.0924076
WBGene00013088	Y51B9A.6b.1	0	0.0924076
WBGene00013107	Y51H4A.13.1	0	0.0844156
WBGene00013119	Y51H4A.25c	-0.436261	0.0761738
WBGene00013119	Y51H4A.25d.1	0.435473	0.0761738
WBGene00013153	Y53F4B.6	0	0.0804196
WBGene00013155	Y53F4B.8	0	0.0854146
WBGene00013158	Y53F4B.11a.1	0	0.0739261
WBGene00013158	Y53F4B.11b.1	0	0.0739261
WBGene00013159	Y53F4B.12a.1	0.255001	0.0774226
WBGene00013159	Y53F4B.12b.1	-0.255001	0.0774226
WBGene00013163	Y53F4B.17.1	0	0.0769231
WBGene00013165	Y53F4B.19.1	0	0.0689311
WBGene00013166	Y53F4B.20.1	0	0.0514486
WBGene00013171	Y53F4B.25a.1	-0.165592	0.0924076
WBGene00013171	Y53F4B.25b.1	0.165592	0.0924076
WBGene00013173	Y53F4B.27a.1	0.333333	0.0709291
WBGene00013173	Y53F4B.27b.1	-0.333333	0.0709291
WBGene00013178	Y53H1A.2a.1	-0.0774049	0.0921578
WBGene00013178	Y53H1A.2b.1	0.0774049	0.0921578
WBGene00013187	Y54E2A.1.1	0	0.0594406
WBGene00013189	Y54E2A.4a.1	-0.127708	0.0606893
WBGene00013189	Y54E2A.4c.1	0.122651	0.0606893
WBGene00013222	Y54G11B.1.1	-0.333333	0.0869131
WBGene00013222	Y54G11B.1.2	0.333333	0.0869131
WBGene00013240	Y56A3A.28.1	0.111799	0.0549451
WBGene00013240	Y56A3A.28.2	-0.111799	0.0549451
WBGene00013264	Y57A10A.24.1	0	0.0579421
WBGene00013301	Y57G11C.3a.1	-0.261702	0.002997
WBGene00013301	Y57G11C.3b.1	0.261702	0.002997
WBGene00013355	Y59A8B.23a.1	-0.0811181	0.0839161
WBGene00013355	Y59A8B.23b.1	0.116116	0.0839161
WBGene00013375	Y62E10A.4a.1	0.274199	0.0754246
WBGene00013375	Y62E10A.4b.1	-0.274199	0.0754246
WBGene00013388	Y62F5A.10.1	0	0.0794206
WBGene00013404	Y63D3A.3.1	0	0.0844156
WBGene00013424	Y66A7A.4.1	0	0.0789211
WBGene00013429	Y66D12A.3.1	0	0.0789211
WBGene00013429	Y66D12A.3.2	0	0.0789211
WBGene00013440	Y66D12A.14.1	0	0.0679321
[truncated: 1,619 more rows]

## Sheet: PRDE1_30min_HS-PRDE1_Ctrl
gene	transcript	dPSI	pval
WBGene00000009	F28F9.4.1	0	0.0849151
WBGene00000021	F55G11.9	0	0.0454545
WBGene00000033	F35A5.3.1	0	0.0729271
WBGene00000034	T01D1.6.1	0	0.0679321
WBGene00000038	Y48B6A.7.1	0	0.0564436
WBGene00000043	K11G12.7.1	0	0.0704296
WBGene00000046	T09A5.3.1	0	0.0554446
WBGene00000048	C40C9.2.1	0	0.0714286
WBGene00000049	R02E12.8.1	0	0.0729271
WBGene00000058	C31H5.3a.1	0	0.0639361
WBGene00000058	C31H5.3b.1	0	0.0639361
WBGene00000059	R06A4.10a.1	-0.23588	0.0944056
WBGene00000059	R06A4.10b.1	0.569213	0.0944056
WBGene00000059	R06A4.10c.1	-0.333333	0.0944056
WBGene00000061	F48E3.7.1	0	0.0454545
WBGene00000062	F59B1.9a.1	0.333333	0.0614386
WBGene00000062	F59B1.9b.1	-0.333333	0.0614386
WBGene00000065	T04C12.4.1	0.049937	0.0254745
WBGene00000065	T04C12.4.2	-0.0499265	0.0254745
WBGene00000069	C10F3.3.1	0	0.0654346
WBGene00000082	C02B4.1a.1	0.25348	0.0514486
WBGene00000082	C02B4.1b.1	-0.25348	0.0514486
WBGene00000083	F08C6.1a.1	-0.23423	0.0397103
WBGene00000083	F08C6.1b.1	0.21678	0.0397103
WBGene00000086	C02H7.3a.1	-0.101596	0.0954046
WBGene00000086	C02H7.3b.1	0.101596	0.0954046
WBGene00000090	B0334.8a.1	-0.0569247	0.0904096
WBGene00000090	B0334.8b.1	0.0569247	0.0904096
WBGene00000093	Y62E10A.5a.1	-0.0661534	0.0759241
WBGene00000093	Y62E10A.5b.1	0.0661534	0.0759241
WBGene00000096	C41G7.5a.1	-0.333333	0.0669331
WBGene00000096	C41G7.5b.1	0.333333	0.0669331
WBGene00000115	F01F1.6.1	0.0277911	0.0899101
WBGene00000115	F01F1.6.2	-0.0277911	0.0899101
WBGene00000144	F15H10.3a.1	0.0516548	0.0919081
WBGene00000144	F15H10.3b.1	0.0509793	0.0919081
WBGene00000144	F15H10.3c.1	0.0500732	0.0919081
WBGene00000144	F15H10.3d.1	-0.152707	0.0519481
WBGene00000166	W04G3.4.1	0	0.0919081
WBGene00000186	C01C7.1a.1	-0.075942	0.0979021
WBGene00000186	C01C7.1b.1	0.075942	0.0979021
WBGene00000193	C38D4.8.1	0	0.044955
WBGene00000242	F20D12.3.1	0	0.0524476
WBGene00000244	T25F10.5.1	0	0.0914086
WBGene00000251	C09G5.6.1	0	0.0919081
WBGene00000252	F59E12.12.1	0	0.0844156
WBGene00000257	F23B12.8a.1	0.0538619	0.0874126
WBGene00000257	F23B12.8b.1	-0.0538619	0.0874126
WBGene00000264	C36A4.8b.1	0.0976147	0.0719281
WBGene00000264	C36A4.8c.1	-0.106244	0.0719281
WBGene00000270	T12G3.8a.1	-0.134334	0.0569431
WBGene00000270	T12G3.8b.1	0.134334	0.0569431
WBGene00000273	Y79H2A.1a.1	0.0692234	0.032967
WBGene00000273	Y79H2A.1c.1	-0.0692234	0.032967
WBGene00000287	M02B7.6a.1	-0.462355	0.0384615
WBGene00000287	M02B7.6b.1	0.462355	0.0384615
WBGene00000295	W01C8.6.1	-0.133548	0.0614386
WBGene00000295	W01C8.6.2	0.133548	0.0614386
WBGene00000296	B0432.5a.1	0	0.0679321
WBGene00000296	B0432.5b.1	0	0.0679321
WBGene00000296	B0432.5c.1	0	0.0679321
WBGene00000302	C56A3.7a.1	-0.280204	0.0894106
WBGene00000302	C56A3.7b.1	0.280204	0.0894106
WBGene00000302	C56A3.7c.1	0	0.0894106
WBGene00000302	C56A3.7d.1	0	0.0894106
WBGene00000372	T10B9.10.1	0	0.0564436
WBGene00000399	R05H10.6.1	0	0.0644356
WBGene00000401	F59C12.1a.1	0.215951	0.0774226
WBGene00000401	F59C12.1b.1	-0.215951	0.0774226
WBGene00000416	Y41D4B.13a.1	0.0498909	0.0899101
WBGene00000416	Y41D4B.13b.1	-0.0498909	0.0899101
WBGene00000429	C27A12.5.1	0	0.0704296
WBGene00000430	C16C2.1.1	0	0.0924076
WBGene00000435	W03A3.1.1	0	0.0719281
WBGene00000439	C13G5.1.1	0	0.0884116
WBGene00000439	C13G5.1.2	0	0.0884116
WBGene00000440	D1007.1.1	0	0.0484515
WBGene00000442	F20D12.6a.1	-0.571575	0.0569431
WBGene00000442	F20D12.6b.1	0.571575	0.0569431
WBGene00000445	F29F11.5a.1	-0.234961	0.0884116
WBGene00000445	F29F11.5b.1	-0.0589103	0.0884116
WBGene00000445	F29F11.5c.1	0.248592	0.0884116
WBGene00000445	F29F11.5d.1	0	0.0884116
WBGene00000445	F29F11.5e.1	0.0452795	0.0884116
WBGene00000447	F55B12.1.1	0	0.0744256
WBGene00000454	C10G8.7.1	0	0.0999001
WBGene00000457	C37E2.4.1	0	0.0979021
WBGene00000485	F18C12.1.1	0	0.0689311
WBGene00000487	C23H5.7.1	0	0.042957
WBGene00000488	F26D11.10a.1	-0.333333	0.0684316
WBGene00000488	F26D11.10b.1	-0.333333	0.0684316
WBGene00000488	F26D11.10c.1	0.666667	0.0684316
WBGene00000488	F26D11.10d.1	0	0.0684316
WBGene00000490	C27A7.4.1	0	0.0639361
WBGene00000492	F59C6.7a.1	-0.0545933	0.0884116
WBGene00000492	F59C6.7b.1	0.0545933	0.0884116
WBGene00000501	C48D1.3.1	0	0.0964036
WBGene00000514	F22F7.5a.1	-0.470096	0.00999001
WBGene00000514	F22F7.5b	0.470096	0.00999001
WBGene00000522	C09F12.1.1	-0.122102	0.0564436
WBGene00000522	C09F12.1.2	0.122102	0.0564436
WBGene00000531	T06F4.2a.1	-0.240442	0.0844156
WBGene00000531	T06F4.2b.1	0.240442	0.0844156
WBGene00000549	R107.6a.1	-0.0937539	0.0609391
WBGene00000549	R107.6b.1	0.0937539	0.0609391
WBGene00000552	T21H3.3a.1	0.032549	0.0654346
WBGene00000552	T21H3.3b.1	-0.032549	0.0654346
WBGene00000561	C34E10.7.1	0	0.0544456
WBGene00000615	F54C9.4.1	0	0.0859141
WBGene00000622	F53G12.7a.1	-0.0746448	0.0909091
WBGene00000622	F53G12.7b.1	0.0746448	0.0909091
WBGene00000625	Y54E10BL.2.1	0	0.0909091
WBGene00000639	ZK265.2.1	0	0.0754246
WBGene00000650	ZK1248.2.1	0	0.0679321
WBGene00000653	M195.1.1	0	0.0739261
WBGene00000664	F17C8.2.1	0	0.0679321
WBGene00000678	F58F6.1.1	0	0.0969031
WBGene00000685	F29B9.9a.1	-0.123724	0.0829171
WBGene00000685	F29B9.9b.1	0.123724	0.0829171
WBGene00000687	C34D4.15a.1	0.599702	0.0499501
WBGene00000687	C34D4.15b.1	-0.599702	0.0499501
WBGene00000689	Y42H9B.1.1	0	0.043956
WBGene00000694	Y11D7A.11.1	0	0.0644356
WBGene00000695	F56D5.1.1	0	0.0964036
WBGene00000704	F08G5.4.1	0	0.0519481
WBGene00000719	T06E4.6.1	0	0.0564436
WBGene00000724	AC3.6.1	0	0.0634366
WBGene00000727	F55C10.2.1	0	0.0829171
WBGene00000730	T11F9.9.1	0	0.0639361
WBGene00000735	Y2H9A.3.1	0	0.0989011
WBGene00000746	F41C6.5.1	0	0.0684316
WBGene00000750	F59F3.2.1	0	0.0739261
WBGene00000754	W03G11.1a.1	0.0111612	0.0889111
WBGene00000754	W03G11.1b.1	-0.0111612	0.0889111
WBGene00000757	F15A2.1a.1	0.0216882	0.0549451
WBGene00000757	F15A2.1b.1	-0.0216882	0.0549451
WBGene00000759	E03G2.4.1	0.333333	0.0699301
WBGene00000759	E03G2.4.2	-0.333333	0.0699301
WBGene00000760	C30F2.1.1	0	0.0649351
WBGene00000763	Y57G11C.11a.1	-0.0749028	0.0859141
WBGene00000763	Y57G11C.11b	-0.0668476	0.0859141
WBGene00000763	Y57G11C.11c	0.14175	0.0859141
WBGene00000788	F32B5.8a.1	0.0133383	0.0949051
WBGene00000788	F32B5.8b.1	-0.0133383	0.0949051
WBGene00000799	K04H4.6a.1	-0.129851	0.0804196
WBGene00000799	K04H4.6b.1	0.129851	0.0804196
WBGene00000819	Y48E1B.13a.1	-0.301011	0.0879121
WBGene00000819	Y48E1B.13b.1	0.195844	0.0879121
WBGene00000819	Y48E1B.13c.1	0.105167	0.0879121
WBGene00000821	Y47H9C.6a.1	-0.0690532	0.0724276
WBGene00000821	Y47H9C.6b	0.0690532	0.0724276
WBGene00000851	C47G2.1.1	0	0.0494505
WBGene00000853	M142.2.1	0	0.0684316
WBGene00000854	C07H6.8.1	-0.0812456	0.0981518
WBGene00000854	C07H6.8.3	0.125324	0.0981518
WBGene00000861	C37H5.4.1	0	0.0899101
WBGene00000862	K11D12.1.1	0	0.0674326
WBGene00000889	Y116A8C.34a.1	0.038987	0.0699301
WBGene00000889	Y116A8C.34b.1	-0.038987	0.0699301
WBGene00000895	B0412.1a.1	0.333333	0.0614386
WBGene00000895	B0412.1b.1	-0.333333	0.0614386
WBGene00000902	F31F6.5.1	0	0.0744256
WBGene00000907	B0240.3a.1	0.407683	0.042957
WBGene00000907	B0240.3b.1	-0.417723	0.042957
WBGene00000907	B0240.3c	0.0100401	0.042957
WBGene00000951	K03B8.9.1	-0.333333	0.0609391
WBGene00000951	K03B8.9.2	0.333333	0.0609391
WBGene00000952	E02H4.1a.1	0	0.0669331
WBGene00000952	E02H4.1b.1	-0.333333	0.0669331
WBGene00000952	E02H4.1c.1	0.333333	0.0669331
WBGene00000953	F58G6.6a.1	0.228468	0.0664336
WBGene00000953	F58G6.6b.1	-0.228468	0.0664336
WBGene00000960	F54G8.2.1	0	0.0509491
WBGene00000962	T21E12.4a.1	-0.0652067	0.0804196
WBGene00000962	T21E12.4b.1	0.0652067	0.0804196
WBGene00000963	R06C7.3.1	0.14857	0.0674326
WBGene00000963	R06C7.3.2	-0.14857	0.0674326
WBGene00000979	C10F3.2.1	0	0.0544456
WBGene00000996	F49E8.5.1	0.0500036	0.0689311
WBGene00000996	F49E8.5.2	-0.0500036	0.0689311
WBGene00001022	C01G8.4.1	-0.333333	0.001998
WBGene00001022	C01G8.4.2	0.333333	0.001998
WBGene00001034	R74.4a.1	0.0793217	0.0539461
WBGene00001034	R74.4b.1	-0.0793217	0.0539461
WBGene00001048	Y71F9B.16a.1	-0.0721451	0.047952
WBGene00001048	Y71F9B.16b.1	0.0721451	0.047952
WBGene00001063	M01E10.2a.1	-0.14437	0.0969031
WBGene00001063	M01E10.2b.1	0.14437	0.0969031
WBGene00001065	EGAP7.1.1	0	0.0939061
WBGene00001070	C31H2.2.1	0	0.0664336
WBGene00001074	F30B5.1.1	0	0.0639361
WBGene00001105	Y41D4B.10a.1	-0.183843	0.0919081
WBGene00001105	Y41D4B.10b.1	0.183843	0.0919081
WBGene00001108	H02I12.4.1	0	0.0654346
WBGene00001111	F29C4.5	0	0.0614386
WBGene00001117	F54C1.5a.1	0	0.0944056
WBGene00001117	F54C1.5b.1	-0.333333	0.0944056
WBGene00001117	F54C1.5b.2	0	0.0944056
WBGene00001117	F54C1.5b.3	0	0.0944056
WBGene00001117	F54C1.5b.4	0.333333	0.0944056
WBGene00001118	ZK520.3a.1	-0.220357	0.0864136
WBGene00001118	ZK520.3b.1	0.220357	0.0864136
WBGene00001119	C04C3.5a.1	0.333333	0.0669331
WBGene00001119	C04C3.5a.2	-0.333333	0.0669331
WBGene00001119	C04C3.5b.1	0	0.0669331
WBGene00001119	C04C3.5c.1	0	0.0669331
WBGene00001133	Y48B6A.4.1	0	0.0499501
WBGene00001150	C29F3.1.1	0.229872	0.0619381
WBGene00001150	C29F3.1.2	-0.229872	0.0619381
WBGene00001162	Y48C3A.17b.1	-0.0627542	0.0929071
WBGene00001162	Y48C3A.17d.1	0.0627542	0.0929071
WBGene00001167	F25H5.4a.1	-0.0183233	0.0824176
WBGene00001167	F25H5.4b.1	0.0183362	0.0824176
WBGene00001169	R03G5.1.1	0.120727	0.014985
WBGene00001169	R03G5.1.3	-0.119052	0.014985
WBGene00001171	F16B3.1a.1	0.401074	0.0714286
WBGene00001171	F16B3.1b.1	-0.401074	0.0714286
WBGene00001172	C51E3.7a.1	-0.0938826	0.0589411
WBGene00001172	C51E3.7c.1	0.0938826	0.0589411
WBGene00001185	F38G1.2.1	0	0.0959041
WBGene00001185	F38G1.2.2	0	0.0959041
WBGene00001193	C23H3.1a.1	0.0809496	0.0899101
WBGene00001193	C23H3.1b.1	-0.0809496	0.0899101
WBGene00001204	C04G2.7.1	0	0.0914086
WBGene00001207	R53.3a.1	-0.733401	0.0989011
WBGene00001207	R53.3b.1	0.828187	0.0989011
WBGene00001210	K11G9.4.1	0	0.0974026
WBGene00001211	C50H2.2a.1	0.284134	0.0624376
WBGene00001211	C50H2.2b.1	-0.284134	0.0624376
WBGene00001232	Y74C10AR.1a.1	-0.0737035	0.0314685
WBGene00001232	Y74C10AR.1b.1	0.0737035	0.0314685
WBGene00001248	F38A6.2a.1	-0.325485	0.0464535
WBGene00001248	F38A6.2b.1	0.325485	0.0464535
WBGene00001249	W09C2.1a.1	0.170108	0.0936563
WBGene00001249	W09C2.1c.1	-0.239246	0.0936563
WBGene00001249	W09C2.1d.1	-0.205186	0.0936563
WBGene00001249	W09C2.1f.1	0.230852	0.0936563
WBGene00001252	C39B10.6a.1	0.333333	0.0584416
WBGene00001252	C39B10.6b.1	-0.333333	0.0584416
WBGene00001258	Y80D3A.2a.1	-0.0988401	0.0442058
WBGene00001258	Y80D3A.2b.1	0.0988401	0.0442058
WBGene00001310	F58E10.2.1	0	0.0869131
WBGene00001333	C01G8.5a.1	-0.0599961	0.0354645
WBGene00001333	C01G8.5b.1	0.0599961	0.0354645
WBGene00001373	H35N03.1.1	0	0.0704296
WBGene00001391	K01A2.2a.1	-0.307066	0.0879121
WBGene00001391	K01A2.2b.1	0.307066	0.0879121
WBGene00001398	VZK822L.1a.1	-0.0440517	0.0599401
WBGene00001398	VZK822L.1c.1	0.0440517	0.0599401
WBGene00001400	F56E3.4a.1	0.0805584	0.0684316
WBGene00001400	F56E3.4b.1	-0.0805584	0.0684316
WBGene00001433	Y18D10A.25.1	-0.161507	0.0729271
WBGene00001433	Y18D10A.25.2	0.161507	0.0729271
WBGene00001434	T14G12.4a.1	-0.189234	0.0694306
WBGene00001434	T14G12.4b.1	0.189234	0.0694306
WBGene00001475	F15B9.7a.1	0.12731	0.0849151
WBGene00001475	F15B9.7b.1	-0.0988547	0.0849151
WBGene00001475	F15B9.7c.1	-0.0284553	0.0849151
WBGene00001477	K08C7.5.1	0	0.0464535
WBGene00001479	F53F4.5a.1	0.138509	0.0519481
WBGene00001479	F53F4.5b	-0.138509	0.0519481
WBGene00001485	Y113G7A.8a.1	0.0722141	0.0694306
WBGene00001485	Y113G7A.8b.1	-0.0722141	0.0694306
WBGene00001496	F25H9.5a.1	-0.0835047	0.0514486
WBGene00001496	F25H9.5b.1	0.0835047	0.0514486
WBGene00001512	ZC482.1.1	0	0.0724276
WBGene00001517	C15B12.5a.1	-0.157258	0.0889111
WBGene00001517	C15B12.5b.1	0.253149	0.0889111
WBGene00001517	C15B12.5c.1	-0.105228	0.0889111
WBGene00001517	C15B12.5d.1	0.183778	0.0889111
WBGene00001517	C15B12.5e.1	-0.174442	0.0889111
WBGene00001529	R134.2	0	0.043956
WBGene00001535	C49H3.1.1	0	0.0729271
WBGene00001541	ZC239.7.1	0	0.0709291
WBGene00001543	ZK896.8.1	0	0.0724276
WBGene00001544	C17F4.6a.1	0.666667	0.0779221
WBGene00001544	C17F4.6b.1	-0.666667	0.0779221
WBGene00001544	C17F4.6c.1	0	0.0899101
WBGene00001546	F22E5.3.1	0	0.0899101
WBGene00001548	T26C12.4.1	0	0.0949051
WBGene00001551	T07D1.1a.1	-0.104798	0.0724276
WBGene00001551	T07D1.1b.1	0.243174	0.0724276
WBGene00001551	T07D1.1c.1	-0.138376	0.0724276
WBGene00001551	T07D1.1d.1	0	0.0724276
WBGene00001552	C06B3.8.1	0	0.0524476
WBGene00001554	M04G12.3.1	0	0.0544456
WBGene00001557	C54E4.3.1	0	0.0684316
WBGene00001564	C05E4.9a.1	0.0461724	0.0669331
WBGene00001564	C05E4.9b.1	-0.0461724	0.0669331
WBGene00001586	C09G5.1.1	0	0.0669331
WBGene00001587	C45B2.4a.1	0.596469	0.0659341
WBGene00001587	C45B2.4b.1	-0.0828377	0.0659341
WBGene00001587	C45B2.4c.1	0	0.0659341
WBGene00001587	C45B2.4d.1	0	0.0659341
WBGene00001587	C45B2.4e.1	0	0.0659341
WBGene00001587	C45B2.4f.1	0	0.0659341
WBGene00001587	C45B2.4g.1	0	0.0659341
WBGene00001587	C45B2.4h.1	0	0.0659341
WBGene00001587	C45B2.4i.1	-0.18911	0.0659341
WBGene00001587	C45B2.4j.1	0	0.0659341
WBGene00001587	C45B2.4k.1	-0.333333	0.0659341
WBGene00001587	C45B2.4l.1	-0.0613858	0.0659341
WBGene00001587	C45B2.4m.1	0.0701981	0.0659341
WBGene00001588	F09C12.1a.1	0.333333	0.0664336
WBGene00001588	F09C12.1b.1	-0.333333	0.0664336
WBGene00001593	ZC317.3.1	0	0.0734266
WBGene00001612	C06E1.4.1	0	0.0804196
WBGene00001615	C06A8.9a.1	-0.294429	0.0709291
WBGene00001615	C06A8.9b.1	0.294429	0.0709291
WBGene00001617	F41B4.4a.1	-0.154758	0.0849151
WBGene00001617	F41B4.4b.1	0.154758	0.0849151
WBGene00001618	C43H6.9a.1	0.0613673	0.0764236
WBGene00001618	C43H6.9a.2	0	0.0764236
WBGene00001618	C43H6.9b.1	-0.0613673	0.0764236
WBGene00001619	F22A3.3a.1	0.666667	0.0514486
WBGene00001619	F22A3.3b.1	-0.666667	0.0514486
WBGene00001626	F44F4.6.1	0	0.0534466
WBGene00001630	Y39E4B.12a.2	0.193157	0.0689311
WBGene00001637	F48E3.1.1	0.296603	0.0854146
WBGene00001637	F48E3.1.2	-0.226964	0.0854146
WBGene00001643	F22D6.11.1	0	0.0669331
WBGene00001664	F38E1.5.1	0	0.0704296
WBGene00001665	E02C12.5a.1	0.0244987	0.0699301
WBGene00001665	E02C12.5b	-0.0244987	0.0699301
WBGene00001667	F53B1.7.1	0	0.042957
WBGene00001668	F48C11.1.1	0	0.0454545
WBGene00001672	C55H1.2.1	0	0.0974026
WBGene00001673	C16A11.1a.1	0	0.0689311
WBGene00001673	C16A11.1a.2	-0.419762	0.0689311
WBGene00001673	C16A11.1b.1	0.419762	0.0689311
WBGene00001675	F18E2.5a.1	-0.213588	0.0974026
WBGene00001675	F18E2.5b.1	0.213588	0.0974026
WBGene00001676	B0207.3.1	0	0.0889111
WBGene00001680	F52A8.2a.1	-0.118678	0.0924076
WBGene00001680	F52A8.2b	0.118678	0.0924076
WBGene00001681	K02A4.2.1	0	0.0904096
WBGene00001681	K02A4.2.2	0	0.0904096
WBGene00001681	K02A4.2.3	0	0.0904096
WBGene00001690	R08B4.1.1	0	0.0924076
WBGene00001690	R08B4.1.2	0	0.0924076
WBGene00001698	C04E6.6.1	0	0.0729271
WBGene00001700	K02E2.2.1	0	0.043956
WBGene00001718	ZC487.4.1	0	0.0534466
WBGene00001723	T03D8.4a.1	1	0
WBGene00001723	T03D8.4b.1	-0.333333	0.0614386
WBGene00001723	T03D8.4c.1	-0.666667	0.0614386
WBGene00001724	Y75B8A.20.1	0	0.0884116
WBGene00001726	C56A3.1.1	0	0.0674326
WBGene00001727	T05C3.4.1	0	0.0804196
WBGene00001736	F40C5.3.1	0	0.0909091
WBGene00001745	R06A10.2a.1	0.107176	0.0879121
WBGene00001745	R06A10.2b.1	-0.107176	0.0879121
WBGene00001750	K08F4.6.1	-0.155145	0.0894106
WBGene00001750	K08F4.6.2	0.155145	0.0894106
WBGene00001753	R03D7.6a.1	-0.167275	0.018981
WBGene00001753	R03D7.6c.1	0.167275	0.018981
WBGene00001756	F11G11.1.1	0	0.0914086
WBGene00001759	R11G1.3.1	0	0.0909091
WBGene00001762	F37B1.3.1	0	0.0669331
WBGene00001781	C02A12.1.1	0	0.0889111
WBGene00001806	ZK622.2.1	0	0.0994006
WBGene00001814	W04C9.1a.1	-0.0964262	0.0904096
WBGene00001814	W04C9.1b.1	0.0964262	0.0904096
WBGene00001816	Y48G8AL.11a.1	0.103626	0.0936563
WBGene00001816	Y48G8AL.11c.1	-0.160044	0.0936563
WBGene00001819	ZK484.2a.1	-0.178643	0.0644356
WBGene00001819	ZK484.2a.2	0.18979	0.0644356
WBGene00001828	F40E10.1.1	0	0.0914086
WBGene00001851	F38A6.3a.1	0.0977746	0.0576923
WBGene00001851	F38A6.3b.1	-0.109938	0.0576923
WBGene00001851	F38A6.3c.1	0.105553	0.0576923
WBGene00001851	F38A6.3e.1	-0.0981953	0.0576923
WBGene00001858	C01B10.5a.1	0.456214	0.0759241
WBGene00001858	C01B10.5c.1	-0.473558	0.0759241
WBGene00001860	F28B3.7a.1	-0.0812389	0.0484515
WBGene00001860	F28B3.7b.1	0.0812389	0.0484515
WBGene00001952	T15H9.3.1	0	0.0949051
WBGene00001953	C02B8.4.1	0.333333	0.0649351
WBGene00001953	C02B8.4.2	-0.333333	0.0649351
WBGene00001954	ZK682.4.1	0	0.0574426
WBGene00001960	DY3.3.1	0	0.0674326
WBGene00001965	C17C3.8.1	0	0.0714286
WBGene00001979	K05C4.6a.1	-0.261073	0.003996
WBGene00001979	K05C4.6b.1	0.261073	0.003996
WBGene00001984	W06B11.4a.1	0.514426	0.0364635
WBGene00001984	W06B11.4b.1	-0.514426	0.0364635
WBGene00001987	Y39B6A.48a.1	-0.223614	0.0794206
WBGene00001987	Y39B6A.48b.1	0.223614	0.0794206
WBGene00001988	W02B8.5.1	0	0.0874126
WBGene00001992	Y48B6A.9.1	0	0.0964036
WBGene00002016	Y46H3A.3a.1	-0.160017	0.0664336
WBGene00002016	Y46H3A.3b.1	0.160017	0.0664336
WBGene00002038	T02C12.1.1	-0.200573	0.0254745
WBGene00002038	T02C12.1.2	0.200573	0.0254745
WBGene00002047	Y39G10AR.13a.1	0.0614594	0.0874126
WBGene00002047	Y39G10AR.13b.1	-0.0614594	0.0874126
WBGene00002051	F52E10.5.1	0	0.0964036
WBGene00002053	F10C1.2a.1	-0.0586809	0.0759241
WBGene00002053	F10C1.2b.1	0.0586809	0.0759241
WBGene00002054	F10C1.7a.1	0.0977097	0.0696803
WBGene00002054	F10C1.7c.1	-0.0977097	0.0696803
WBGene00002072	T19B10.7.1	-0.132189	0.0114885
WBGene00002072	T19B10.7.2	0.132189	0.0114885
WBGene00002079	Y48G1A.5a.1	-0.0583094	0.0639361
WBGene00002079	Y48G1A.5b.1	0.0583094	0.0639361
WBGene00002083	F57B9.6a.1	-0.0140375	0.0864136
WBGene00002083	F57B9.6b.1	0.0140375	0.0864136
WBGene00002088	ZK84.3.1	0.16661	0.0529471
WBGene00002088	ZK84.3.2	-0.16661	0.0529471
WBGene00002111	ZC334.9.1	-0.459785	0.023976
WBGene00002111	ZC334.9.2	0.459785	0.023976
WBGene00002119	Y53H1A.4a.1	-0.156457	0.0829171
WBGene00002119	Y53H1A.4b.1	0.156457	0.0829171
WBGene00002136	F07A5.1a.2	-0.0760469	0.0764236
WBGene00002136	F07A5.1b.1	0.0760469	0.0764236
WBGene00002141	T16H5.1a.1	-0.472418	0.0996503
WBGene00002141	T16H5.1b.1	0.472418	0.0996503
WBGene00002142	T23H4.1a.1	-0.333333	0.0824176
WBGene00002142	T23H4.1b.1	0.440344	0.0824176
WBGene00002142	T23H4.1c.1	-0.107011	0.0824176
WBGene00002144	Y47G6A.2.1	-0.0732329	0.0374625
WBGene00002144	Y47G6A.2.2	0.0732329	0.0374625
WBGene00002147	C41C4.4a.1	-0.0680684	0.0764236
WBGene00002147	C41C4.4b.1	0.0680684	0.0764236
WBGene00002152	R11A8.6.1	0.109255	0.026973
WBGene00002152	R11A8.6.2	-0.109255	0.026973
WBGene00002182	F08F8.3a.1	-0.405117	0.0861638
WBGene00002182	F08F8.3a.2	0.333333	0.0861638
WBGene00002184	C47D12.7a.1	0.521468	0.025974
WBGene00002184	C47D12.7b.1	-0.521468	0.025974
WBGene00002190	R07E4.6a.1	0.117314	0.0734266
WBGene00002190	R07E4.6b.1	-0.049829	0.0924076
WBGene00002190	R07E4.6c.1	-0.0674847	0.0924076
WBGene00002196	T01G9.6a.1	0.0752752	0.048951
WBGene00002196	T01G9.6a.2	-0.0794735	0.048951
WBGene00002196	T01G9.6b.1	-0.042805	0.0594406
WBGene00002196	T01G9.6b.2	0.0470033	0.0594406
WBGene00002199	M176.6a.1	-0.12822	0.0799201
WBGene00002199	M176.6b.1	0.12822	0.0799201
WBGene00002224	F22F4.3.1	0	0.0939061
WBGene00002246	Y73C8B.4.1	0	0.0669331
WBGene00002262	F13D12.2a.1	-0.082222	0.026973
WBGene00002262	F13D12.2b.1	0.082222	0.026973
WBGene00002282	C44H4.2.1	0	0.0914086
WBGene00002393	Y65B4BR.2a.1	-0.118216	0.0944056
WBGene00002393	Y65B4BR.2b.1	0.618345	0.0944056
WBGene00002393	Y65B4BR.2c.1	0	0.0944056
WBGene00002393	Y65B4BR.2d.1	-0.211255	0.0944056
WBGene00002393	Y65B4BR.2e.1	-0.0545661	0.0944056
WBGene00002393	Y65B4BR.2f.1	-0.234308	0.0944056
WBGene00002879	C29E4.8.1	-0.0487914	0.0944056
WBGene00002879	C29E4.8.3	0.04239	0.0944056
WBGene00002983	C54G7.3a.1	0.045443	0.0664336
WBGene00002983	C54G7.3b.1	-0.164559	0.0664336
WBGene00002983	C54G7.3c.1	0	0.0664336
WBGene00002983	C54G7.3d.1	0.119116	0.0664336
WBGene00002983	C54G7.3e.1	0	0.0664336
WBGene00002983	C54G7.3f.1	0	0.0664336
WBGene00002983	C54G7.3g.1	0	0.0664336
WBGene00002983	C54G7.3h.1	0	0.0664336
WBGene00002983	C54G7.3i.1	0	0.0664336
WBGene00002990	C37F5.1a.1	0.100856	0.0979021
WBGene00002990	C37F5.1b.1	-0.100856	0.0979021
WBGene00002994	T09A5.10.1	0.0381376	0.0984016
WBGene00002994	T09A5.10.2	-0.0381376	0.0984016
WBGene00003008	Y54G2A.1.1	0	0.0669331
WBGene00003058	ZK945.9.1	0	0.043956
WBGene00003075	T04H1.6.1	0	0.0704296
WBGene00003087	F49H12.1a.1	-0.177366	0.0354645
WBGene00003087	F49H12.1b.1	0.177366	0.0354645
WBGene00003092	Y22F5A.6.1	0	0.0744256
WBGene00003099	F17E9.11.1	0	0.0694306
WBGene00003100	Y53C12B.5a.1	-0.19895	0.0669331
WBGene00003100	Y53C12B.5b.1	0.19895	0.0669331
WBGene00003100	Y53C12B.5b.2	0	0.0669331
WBGene00003104	ZC13.4.1	0	0.0879121
WBGene00003132	Y110A7A.17a.1	0.042265	0.0739261
WBGene00003132	Y110A7A.17b.1	-0.042265	0.0739261
WBGene00003156	Y39G10AR.14a.1	-0.0445682	0.0909091
WBGene00003156	Y39G10AR.14b.1	0.0445682	0.0909091
WBGene00003158	ZK632.1a.1	-0.0355812	0.0744256
WBGene00003158	ZK632.1b.1	0.0355812	0.0744256
WBGene00003168	T01C8.7.1	0	0.0589411
WBGene00003174	F16F9.5.1	0	0.0859141
WBGene00003176	F37C12.12.1	0	0.0509491
WBGene00003178	F57H12.7a.1	0.183392	0.0494505
WBGene00003178	F57H12.7b.1	-0.183392	0.0494505
WBGene00003209	ZK858.4a.1	-0.0252318	0.0989011
WBGene00003209	ZK858.4b.1	0.0252318	0.0989011
WBGene00003247	ZC504.4a.1	-0.322724	0.0659341
WBGene00003371	F09F7.2a.1	0.0260245	0.0666833
WBGene00003371	F09F7.2a.2	-0.0260886	0.0666833
WBGene00003376	H14A12.4.1	0	0.0969031
WBGene00003377	C39E6.4.1	0	0.0589411
WBGene00003402	C04G6.1c.1	-0.402699	0.0679321
WBGene00003402	C04G6.1c.2	0.330281	0.0679321
WBGene00003406	Y37D8A.9a.1	-0.0366202	0.0689311
WBGene00003406	Y37D8A.9b.1	0.0366202	0.0689311
WBGene00003417	Y41C4A.14.1	-0.0932114	0.0779221
WBGene00003417	Y41C4A.14.2	0.0932114	0.0779221
WBGene00003527	C34D4.9.1	-0.333333	0.0789211
WBGene00003527	C34D4.9.2	0.333333	0.0789211
WBGene00003531	C24F3.3.1	0	0.0664336
WBGene00003534	T04G9.2.1	0	0.0579421
WBGene00003544	F46C5.3.1	0	0.0674326
WBGene00003545	T23F4.4.1	0	0.0684316
WBGene00003547	F58A6.4.1	0	0.0624376
WBGene00003551	K04E7.3.1	0	0.0669331
WBGene00003554	F57C12.1.1	0	0.0874126
WBGene00003558	C27F2.2a.1	0	0.0929071
WBGene00003558	C27F2.2b.1	0	0.0929071
WBGene00003574	C13D9.8.1	0	0.0499501
WBGene00003575	Y97E10B.7a.1	0.333333	0.0689311
WBGene00003575	Y97E10B.7b.1	-0.333333	0.0689311
WBGene00003586	F13H10.2a.1	-0.0848723	0.0454545
WBGene00003586	F13H10.2b.1	0.0848723	0.0454545
WBGene00003591	C37H5.1a.1	-0.443395	0.0954046
WBGene00003591	C37H5.1a.2	0	0.0954046
WBGene00003591	C37H5.1a.3	0.443395	0.0954046
WBGene00003591	C37H5.1b.1	0	0.0954046
WBGene00003591	C37H5.1c.1	0	0.0954046
WBGene00003613	T01B10.4a.1	-0.0914834	0.0999001
WBGene00003613	T01B10.4b.1	0.0914834	0.0999001
WBGene00003628	C07A12.3a.1	-0.198639	0.042957
WBGene00003628	C07A12.3b.1	0.198639	0.042957
WBGene00003633	C29E6.5a.1	0.119926	0.0924076
WBGene00003633	C29E6.5b.1	-0.119926	0.0924076
WBGene00003649	T27B7.1a.1	0.429455	0.0559441
WBGene00003649	T27B7.1b.1	-0.429455	0.0559441
WBGene00003657	C08F8.8.1	0	0.0894106
WBGene00003658	H12C20.3a.1	-0.0601001	0.0989011
WBGene00003658	H12C20.3b.1	0.0601001	0.0989011
WBGene00003669	T26H2.9a.1	0.17232	0.0829171
WBGene00003669	T26H2.9b.1	-0.17232	0.0829171
WBGene00003670	H10E21.3a.1	-0.141059	0.0794206
WBGene00003670	H10E21.3b.1	0.141059	0.0794206
WBGene00003671	C47F8.8.1	0	0.0939061
WBGene00003673	F48G7.3a	0.112528	0.0924076
WBGene00003673	F48G7.3b	-0.112528	0.0924076
WBGene00003676	Y40B10A.8a.1	0.074284	0.0939061
WBGene00003676	Y40B10A.8b.1	-0.074284	0.0939061
WBGene00003683	T24A6.9a.1	0.0814653	0.0869131
WBGene00003683	T24A6.9b.1	0.518237	0.0869131
WBGene00003683	T24A6.9c.1	-0.525693	0.0869131
WBGene00003683	T24A6.9d	-0.0740088	0.0869131
WBGene00003698	F35E8.12.1	0.325977	0.0664336
WBGene00003698	F35E8.12.2	-0.325977	0.0664336
WBGene00003705	T27B7.4a.1	0.576733	0.025974
WBGene00003705	T27B7.4b.1	-0.576733	0.025974
WBGene00003711	E02H9.8a.1	0.188348	0.0594406
WBGene00003711	E02H9.8b.1	-0.188348	0.0594406
WBGene00003729	B0395.1.1	-0.143086	0.0799201
WBGene00003729	B0395.1.2	0.143086	0.0799201
WBGene00003731	C54F6.13a.1	-0.432313	0.0509491
WBGene00003731	C54F6.13a.2	0.401226	0.0509491
WBGene00003734	F58E1.6a.1	0	0.0664336
WBGene00003734	F58E1.6b.1	0	0.0664336
WBGene00003763	Y43F8C.1.1	0	0.0509491
WBGene00003768	B0213.5.1	0	0.0894106
WBGene00003774	F07F6.6.1	0	0.0684316
WBGene00003775	T01C3.10a.1	0.0508525	0.0754246
WBGene00003775	T01C3.10b.1	-0.0508525	0.0754246
WBGene00003803	F10G8.3.1	-0.0455987	0.0779221
WBGene00003803	F10G8.3.2	0.0455987	0.0779221
WBGene00003808	T05A1.1a.1	0.181799	0.0914086
WBGene00003808	T05A1.1b.1	0	0.0914086
WBGene00003808	T05A1.1b.2	0.333333	0.0914086
WBGene00003808	T05A1.1c.1	-0.515133	0.0914086
WBGene00003830	T03D8.1c.1	-0.24694	0.0024975
WBGene00003830	T03D8.1e.1	0.253564	0.0024975
WBGene00003838	F28H7.10a.1	0	0.043956
WBGene00003838	F28H7.10b.1	0	0.043956
WBGene00003839	T09A12.3a.1	-0.235454	0.0889111
WBGene00003839	T09A12.3b.1	0.235454	0.0889111
WBGene00003848	R01E6.1.1	0	0.0549451
WBGene00003849	T01C4.2a.1	0.1607	0.0879121
WBGene00003849	T01C4.2b.1	0.341991	0.0879121
WBGene00003849	T01C4.2c.1	-0.50269	0.0879121
WBGene00003850	C34D1.3.1	0	0.0689311
WBGene00003879	F57H12.3.1	0	0.0904096
WBGene00003886	R31.3.1	0	0.0669331
WBGene00003887	T05D4.4a.1	0.144756	0.0839161
WBGene00003887	T05D4.4b.1	-0.144756	0.0839161
WBGene00003891	F11C7.5.1	-0.131362	0.003996
WBGene00003891	F11C7.5.2	0.131362	0.003996
WBGene00003902	Y106G6H.2.1	0.0251898	0.0734266
WBGene00003902	Y106G6H.2.2	-0.0255148	0.0734266
WBGene00003909	F45B8.4.1	0	0.0534466
WBGene00003915	M88.6a.1	-0.0731366	0.0951548
WBGene00003915	M88.6b.1	0.0731366	0.0951548
WBGene00003933	T27B1.2a.1	0.492065	0.0609391
WBGene00003933	T27B1.2b.1	-0.492065	0.0609391
WBGene00003939	F27E5.2.1	0	0.0669331
WBGene00003979	T27D12.4a.1	-0.100234	0.0774226
WBGene00003979	T27D12.4b.1	-0.290551	0.0172328
WBGene00003979	T27D12.4c.1	0.390785	0.0172328
WBGene00003981	F18G5.2a.1	-0.190403	0.0714286
WBGene00003981	F18G5.2b.1	0.190403	0.0714286
WBGene00003992	ZK381.4a.2	0.0696062	0.0509491
WBGene00003992	ZK381.4b.1	-0.0696062	0.0509491
WBGene00004001	T21E8.2.1	0	0.0754246
WBGene00004005	DH11.3.1	0.155242	0.0814186
WBGene00004005	DH11.3.2	-0.155242	0.0814186
WBGene00004011	M6.3.1	0	0.0744256
WBGene00004017	F27E5.4.1	0	0.0694306
WBGene00004026	T20B3.7.1	0.520569	0.016983
WBGene00004026	T20B3.7.2	-0.520569	0.016983
WBGene00004045	K10F12.3a.1	0.127305	0.0904096
WBGene00004045	K10F12.3b.1	-0.127305	0.0904096
WBGene00004103	C09G1.1	0	0.0914086
WBGene00004115	DY3.5.1	0	0.0574426
WBGene00004118	F10F2.9.1	0	0.0529471
WBGene00004119	F21C10.8a.1	-0.2312	0.0344655
WBGene00004119	F21C10.8b.1	0.2312	0.0344655
WBGene00004120	F29C12.1a.1	0.421176	0.0569431
WBGene00004120	F29C12.1b.1	-0.421176	0.0569431
WBGene00004127	F52D1.3a.1	-0.333333	0.0424575
WBGene00004127	F52D1.3b.1	-0.333333	0.0424575
WBGene00004127	F52D1.3c.1	0.666667	0.0424575
WBGene00004131	F55A12.9c.1	0.415247	0.00374625
WBGene00004131	F55A12.9d.1	-0.391258	0.00374625
WBGene00004133	F57B9.9.1	0	0.0974026
WBGene00004149	T16A1.7.1	0	0.0569431
WBGene00004155	W01C9.3a.1	-0.333333	0.0729271
WBGene00004155	W01C9.3b.1	0.333333	0.0729271
WBGene00004156	W02A2.3a.1	-0.333333	0.0654346
WBGene00004156	W02A2.3b.1	0.333333	0.0654346
WBGene00004174	ZK1067.7.1	0	0.0504496
WBGene00004177	ZK488.7.1	0	0.0889111
WBGene00004193	C15H9.8a.1	0.130213	0.0639361
WBGene00004193	C15H9.8b.1	-0.130213	0.0639361
WBGene00004209	F21H12.4	0	0.0699301
WBGene00004211	F07C3.1.1	0	0.043956
WBGene00004218	C41D7.2.1	-0.333333	0.0594406
WBGene00004218	C41D7.2.2	0.333333	0.0594406
WBGene00004219	C45B2.7.1	0	0.0704296
WBGene00004224	F55F8.1.1	-0.333333	0.0764236
WBGene00004224	F55F8.1.2	0.333333	0.0764236
WBGene00004231	Y18D10A.7.1	0	0.0559441
WBGene00004255	T20G5.5.1	0	0.0704296
WBGene00004264	T05C12.10.1	0	0.0684316
WBGene00004281	Y11D7A.4.1	0	0.0699301
WBGene00004296	T04H1.4a.1	-0.0808538	0.0509491
WBGene00004296	T04H1.4b.1	0.0808538	0.0509491
WBGene00004301	T24C2.1.1	0	0.0699301
WBGene00004328	F53F4.6a.1	0.264694	0.0584416
WBGene00004328	F53F4.6b.1	-0.264694	0.0584416
WBGene00004335	C47C12.3a.1	-0.197894	0.0829171
WBGene00004335	C47C12.3b.1	0.197894	0.0829171
WBGene00004374	T11F8.3a.1	0.0554009	0.0414585
WBGene00004374	T11F8.3b.1	-0.0554009	0.0414585
WBGene00004381	C16C10.7a.1	0.0756809	0.0992341
WBGene00004381	C16C10.7b.1	0.0675014	0.0992341
WBGene00004381	C16C10.7c.1	-0.122111	0.0979021
WBGene00004387	R07E5.14.1	0.0283852	0.0834166
WBGene00004387	R07E5.14.2	-0.0283852	0.0834166
WBGene00004394	Y57A10A.11.1	0	0.0704296
WBGene00004398	ZK1290.3.1	0	0.0739261
WBGene00004409	Y37E3.7.1	0.0836348	0.00649351
WBGene00004409	Y37E3.7.2	-0.0836348	0.00649351
WBGene00004445	W09C5.6a.1	-0.0767265	0.00899101
WBGene00004445	W09C5.6b.1	0.0767265	0.00899101
WBGene00004446	T24B8.1a.1	0.022145	0.0454545
WBGene00004446	T24B8.1b.1	-0.022145	0.0454545
WBGene00004447	F10E7.7.1	-0.0197181	0.0514486
WBGene00004447	F10E7.7.2	0.0197181	0.0514486
WBGene00004475	Y71A12B.1a.1	-0.0267239	0.0474525
WBGene00004475	Y71A12B.1c.1	0.0267239	0.0474525
WBGene00004507	C18H9.7.1	0.117974	0.0934066
WBGene00004507	C18H9.7.2	-0.117974	0.0934066
WBGene00004728	F21H11.2a.1	-0.0637005	0.0824176
WBGene00004728	F21H11.2b.1	0.0637005	0.0824176
WBGene00004736	K11D9.2a.1	0.0432185	0.0819181
WBGene00004736	K11D9.2b.2	-0.0476488	0.0819181
WBGene00004744	D2013.8a.1	0.400153	0
WBGene00004744	D2013.8b.1	-0.55682	0
WBGene00004764	K04G11.2.1	0	0.0709291
WBGene00004776	F59C12.2a.1	0.182512	0.0804196
WBGene00004776	F59C12.2b.1	-0.182512	0.0804196
WBGene00004800	R11A8.4a.1	-0.0777233	0.0689311
WBGene00004800	R11A8.4b.1	0.0777233	0.0689311
WBGene00004802	F46G10.3.1	0.607979	0.0174825
WBGene00004802	F46G10.3.2	-0.607979	0.0174825
WBGene00004824	F56B3.4a.1	-0.0973748	0.0869131
WBGene00004824	F56B3.4c.1	0.0876471	0.0869131
WBGene00004873	Y47D3A.26a.1	-0.0871229	0.038961
WBGene00004873	Y47D3A.26c.1	0.0871229	0.038961
WBGene00004878	Y69A2AR.4.1	-0.112024	0.0964036
WBGene00004878	Y69A2AR.4.2	0.112024	0.0964036
WBGene00004903	Y46G5A.25	0	0.0734266
WBGene00004907	ZK829.10	0	0.0729271
WBGene00004923	Y75B7AL.3.1	0.179634	0.0809191
WBGene00004923	Y75B7AL.3.2	0.219054	0.0809191
WBGene00004923	Y75B7AL.3.3	-0.398688	0.0809191
WBGene00004964	AC3.10.1	-0.333333	0.0579421
WBGene00004964	AC3.10.2	0.333333	0.0579421
WBGene00004995	C28C12.7a.1	-0.0295745	0.0859141
WBGene00004995	C28C12.7b.1	0.0295745	0.0859141
WBGene00005007	C27B7.1a.1	-0.0431087	0.0724276
WBGene00005007	C27B7.1b.1	0.0431087	0.0724276
WBGene00005008	C07A12.5a.1	0.152394	0.0514486
WBGene00005008	C07A12.5b.1	-0.152394	0.0514486
WBGene00005017	C01B12.1.1	0	0.0749251
WBGene00005019	D2096.4a.1	0.0583319	0.0784216
WBGene00005019	D2096.4b.1	-0.0583319	0.0784216
WBGene00005026	ZK1307.5.1	0.177799	0.010989
WBGene00005026	ZK1307.5.2	-0.177799	0.010989
WBGene00005032	AH6.10.1	0	0.0644356
WBGene00005036	F44F4.5a.1	-0.333333	0.0694306
WBGene00005036	F44F4.5b.1	0.333333	0.0694306
WBGene00005037	F44F4.13.1	0	0.0564436
WBGene00005059	B0304.6.1	0	0.0689311
WBGene00005081	K10B4.5.1	0	0.0744256
WBGene00005110	T19H12.5.1	0	0.0849151
WBGene00005113	R186.2a.1	0	0.0724276
WBGene00005113	R186.2b.1	0	0.0724276
WBGene00005147	F48F5.4a.1	0.267442	0.0934066
WBGene00005147	F48F5.4b	-0.267442	0.0934066
WBGene00005176	Y105C5A.11	0	0.0654346
WBGene00005191	Y51A2D.12.1	0	0.0659341
WBGene00005241	F55C5.9.1	0	0.0584416
WBGene00005291	T21B4.9.1	0	0.0714286
WBGene00005308	H27D07.6.1	0	0.0494505
WBGene00005346	F14F9.7.1	0	0.0654346
WBGene00005368	K08G2.3	0	0.043956
WBGene00005468	K10G4.7	0	0.0534466
WBGene00005517	F28D9.2a.1	0.144416	0.0664336
WBGene00005517	F28D9.2b.1	-0.144416	0.0664336
WBGene00005525	M01G12.13.1	0	0.0714286
WBGene00005533	T24A6.4.1	0	0.0999001
WBGene00005597	T20C4.1a.1	0.333333	0.0804196
WBGene00005597	T20C4.1b.1	-0.166015	0.0804196
WBGene00005597	T20C4.1c.1	0	0.0804196
WBGene00005597	T20C4.1d.1	-0.167318	0.0804196
WBGene00005616	F22B8.1.1	0	0.0494505
WBGene00005648	F20D6.4a.1	0.111743	0.023976
WBGene00005648	F20D6.4d.1	-0.107399	0.023976
WBGene00005652	W07G4.6a.1	0	0.0849151
WBGene00005652	W07G4.6b.1	0	0.0849151
WBGene00005654	F36D3.3.1	0	0.0904096
WBGene00005683	T04A11.7a.1	-0.0011128	0.0514486
WBGene00005683	T04A11.7c.1	0.0011128	0.0514486
WBGene00005688	F31F4.14a.1	0	0.0654346
WBGene00005688	F31F4.14b.1	0	0.0654346
WBGene00005743	T13A10.12.1	0	0.0694306
WBGene00005791	F14F8.6.1	0	0.0669331
WBGene00005813	Y57G7A.4.1	0	0.0554446
WBGene00005893	R03H4.2.1	0	0.0584416
WBGene00005904	C44B12.4.1	0	0.0509491
WBGene00005912	F31F4.4.1	0	0.043956
WBGene00005932	F59B1.7.1	0	0.0744256
WBGene00005959	K07C6.11a.1	0.0140299	0.0649351
WBGene00005959	K07C6.11b.1	-0.0140299	0.0649351
WBGene00006009	T21B4.12.1	0	0.0679321
WBGene00006012	C04E12.8.1	0	0.0674326
WBGene00006016	F32H5.6a.1	0.00872757	0.0984016
WBGene00006016	F32H5.6b.1	0.288964	0.0984016
WBGene00006016	F32H5.6c.1	-0.297691	0.0984016
WBGene00006055	C14A11.7.1	0	0.0989011
WBGene00006065	F52D10.5.1	0	0.0689311
WBGene00006068	Y71H9A.2.1	0	0.0984016
WBGene00006080	B0391.4.1	0	0.0494505
WBGene00006130	Y73C8C.6a.1	-0.286755	0.0769231
WBGene00006130	Y73C8C.6b.1	0.286755	0.0769231
WBGene00006139	F52D2.9.1	0	0.0709291
WBGene00006191	C09H5.5.1	0	0.0699301
WBGene00006195	M01D1.1a.1	-0.00499145	0.0654346
WBGene00006195	M01D1.1b.1	0.00499145	0.0654346
WBGene00006215	T01G5.5.1	0	0.0714286
WBGene00006229	F26D10.8.1	0	0.0674326
WBGene00006349	F39B2.4a.1	0.0809648	0.0839161
WBGene00006349	F39B2.4b.1	-0.0809648	0.0839161
WBGene00006363	F35D2.5a.1	-0.333333	0.0834166
WBGene00006363	F35D2.5c.1	0.112614	0.0834166
WBGene00006363	F35D2.5c.2	0.220719	0.0834166
WBGene00006387	W09B6.2a.1	0.115461	0.0949051
WBGene00006387	W09B6.2b.1	-0.115461	0.0949051
WBGene00006396	Y56A3A.4a.1	0.0769326	0.0544456
WBGene00006396	Y56A3A.4b.1	-0.0769326	0.0544456
WBGene00006402	F59E12.13.1	0.331131	0.001998
WBGene00006402	F59E12.13.2	-0.331131	0.001998
WBGene00006410	ZK470.5a.1	0.11677	0.0604396
WBGene00006410	ZK470.5b.1	-0.11677	0.0604396
WBGene00006411	F14D12.6a.1	-0.116887	0.0894106
WBGene00006411	F14D12.6b.1	0.116887	0.0894106
WBGene00006429	M176.1a.1	-0.333333	0.0654346
WBGene00006429	M176.1b.1	0.333333	0.0654346
WBGene00006434	F09E5.15a.1	0.027882	0.0524476
WBGene00006434	F09E5.15b.1	0.0202527	0.0524476
WBGene00006434	F09E5.15c.1	-0.0481346	0.044955
WBGene00006487	C30H6.2.1	-0.333333	0.0774226
WBGene00006487	C30H6.2.2	0.333333	0.0774226
WBGene00006519	F54D8.2.1	0.0321615	0.0799201
WBGene00006519	F54D8.2.3	-0.0785504	0.0799201
WBGene00006519	F54D8.2.4	0.0463889	0.0799201
WBGene00006525	F36F2.5.1	0	0.0504496
WBGene00006526	ZC84.2.1	0	0.0739261
WBGene00006528	F26E4.8a.1	0.020091	0.0764236
WBGene00006528	F26E4.8b.1	-0.020091	0.0764236
WBGene00006531	F16D3.1.1	0	0.0744256
WBGene00006538	B0272.1.1	0	0.0899101
WBGene00006541	H13N06.6a.1	0.0260163	0.0789211
WBGene00006541	H13N06.6b.1	-0.0866933	0.0314685
WBGene00006541	H13N06.6c.1	0.060677	0.0352148
WBGene00006545	T07C4.2.1	0.333333	0.0799201
WBGene00006545	T07C4.2.2	-0.333333	0.0799201
WBGene00006551	ZK380.1.1	0	0.0764236
WBGene00006557	C24H11.3.1	0	0.0719281
WBGene00006558	Y73F8A.16.1	0	0.0649351
WBGene00006576	C38C10.1.1	0	0.0729271
WBGene00006604	Y47D3A.6a.1	0.0821805	0.0999001
WBGene00006604	Y47D3A.6b.1	-0.0821805	0.0999001
WBGene00006608	T05A12.2b.1	-0.169299	0.0599401
WBGene00006608	T05A12.2c.1	0.105901	0.0779221
WBGene00006612	F45G2.6.1	0	0.0514486
WBGene00006614	ZC21.2a.1	0.261661	0.0639361
WBGene00006614	ZC21.2b.1	-0.261661	0.0639361
WBGene00006616	Y71A12B.4.1	0	0.0679321
WBGene00006622	F31D4.6.1	0	0.0914086
WBGene00006623	K07B1.1.1	0	0.0894106
WBGene00006648	W03F9.5.1	0.12553	0.0367133
WBGene00006648	W03F9.5.2	-0.122106	0.0367133
WBGene00006650	F09E10.11a	0.552541	0
WBGene00006650	F09E10.11b	-0.552541	0
WBGene00006655	F10B5.4.1	0	0.0679321
WBGene00006656	F21C3.1.1	-0.269705	0.0234765
WBGene00006656	F21C3.1.2	0.269705	0.0234765
WBGene00006657	T12C9.3a.1	-0.121037	0.0929071
WBGene00006657	T12C9.3b.1	0	0.0929071
WBGene00006657	T12C9.3c.1	0.211376	0.0929071
WBGene00006657	T12C9.3d.1	-0.171409	0.0929071
WBGene00006657	T12C9.3e.1	0.0954602	0.0929071
WBGene00006657	T12C9.3f.1	-0.0143898	0.0929071
WBGene00006661	F17C8.5.1	0	0.0659341
WBGene00006664	ZK1251.8a.1	0	0.0914086
WBGene00006664	ZK1251.8b.1	0	0.0914086
WBGene00006672	C24A3.6.1	0.0842172	0.0799201
WBGene00006672	C24A3.6.2	-0.0842172	0.0799201
WBGene00006681	F46A9.3a.1	0.0325655	0.0999001
WBGene00006681	F46A9.3b.1	-0.0325655	0.0999001
WBGene00006682	F36A2.4.1	0	0.0989011
WBGene00006683	Y47D3B.5a.1	0.212695	0.0889111
WBGene00006683	Y47D3B.5b.1	-0.212695	0.0889111
WBGene00006684	F53C11.6.1	0	0.0979021
WBGene00006687	F31D4.7.1	0	0.0644356
WBGene00006690	C24H11.8a.1	0.554782	0.0639361
WBGene00006690	C24H11.8b.1	-0.554782	0.0639361
WBGene00006691	T28A8.1a.1	-0.424834	0.0711788
WBGene00006691	T28A8.1b.1	0.148017	0.0794206
WBGene00006691	T28A8.1c.1	0.276817	0.0711788
WBGene00006692	W06D12.2.2	0.513214	0.032967
WBGene00006692	W06D12.2.3	-0.476855	0.032967
WBGene00006702	Y71G12B.15a.1	0.0336856	0.0759241
WBGene00006702	Y71G12B.15b.1	-0.0336856	0.0759241
WBGene00006712	B0403.2.1	0	0.0894106
WBGene00006724	C08B11.7.1	-0.0355369	0.0759241
WBGene00006724	C08B11.7.2	0.0355369	0.0759241
WBGene00006727	F25B5.4.1	-0.0197159	0.0734266
WBGene00006727	F25B5.4.2	0.0197159	0.0734266
WBGene00006729	K07B1.3.1	-0.168722	0.034965
WBGene00006729	K07B1.3.2	0.168722	0.034965
WBGene00006731	F56D2.4.1	0	0.0729271
WBGene00006732	F26H9.7a.1	0.0867067	0.0614386
WBGene00006732	F26H9.7b.1	-0.0867067	0.0614386
WBGene00006741	K03E6.5a.1	-0.112341	0.0974026
WBGene00006741	K03E6.5b.1	0.112341	0.0974026
WBGene00006743	Y16B4A.1.1	0	0.0659341
WBGene00006744	F26C11.2.1	0	0.0649351
WBGene00006746	F41C6.1.1	0.333333	0.0689311
WBGene00006746	F41C6.1.2	-0.333333	0.0689311
WBGene00006748	R13A1.4a.1	0.109127	0.0714286
WBGene00006748	R13A1.4b.1	0.224207	0.0714286
WBGene00006748	R13A1.4c.1	0	0.0714286
WBGene00006748	R13A1.4d.1	-0.333333	0.0714286
WBGene00006749	R12H7.1a.1	-0.196396	0.0939061
WBGene00006749	R12H7.1a.2	0.333333	0.0939061
WBGene00006749	R12H7.1b.1	-0.136938	0.0939061
WBGene00006754	F07A5.7a.1	-0.181353	0.0044955
WBGene00006754	F07A5.7a.2	0.182906	0.0044955
WBGene00006760	H14N18.1a.1	-0.136905	0.0681818
WBGene00006760	H14N18.1b.1	0.132797	0.0681818
WBGene00006778	F58E6.10a.1	-0.0814688	0.0979021
WBGene00006778	F58E6.10b.1	0.324568	0.0979021
WBGene00006778	F58E6.10c.1	0	0.0979021
WBGene00006778	F58E6.10d.1	-0.243099	0.0979021
WBGene00006778	F58E6.10e.1	0	0.0979021
WBGene00006783	T20G5.6.1	0	0.0679321
WBGene00006790	F55D12.4a.1	-0.160463	0.0819181
WBGene00006790	F55D12.4b.1	0.160463	0.0819181
WBGene00006822	C46F11.1a.1	-0.240949	0.0714286
WBGene00006822	C46F11.1b.1	0.240949	0.0714286
WBGene00006873	M142.4.1	0	0.0919081
WBGene00006881	R07B1.1.1	0	0.0974026
WBGene00006914	F35H10.4.1	0.105385	0.0561938
WBGene00006914	F35H10.4.2	-0.164096	0.0524476
WBGene00006914	F35H10.4.3	0.0587103	0.0769231
WBGene00006931	T20D3.7a.1	0.162026	0.043956
WBGene00006931	T20D3.7b.1	-0.142619	0.043956
WBGene00006931	T20D3.7c.1	-0.0872566	0.0752581
WBGene00006931	T20D3.7d.1	0.0678499	0.0774226
WBGene00006932	B0025.1a.1	0.0908692	0.0789211
WBGene00006932	B0025.1c.1	-0.0908692	0.0789211
WBGene00006934	T21C9.2a.1	-0.0945994	0.0544456
WBGene00006934	T21C9.2b.1	0.0945994	0.0544456
WBGene00006948	F52E4.6.1	0	0.0554446
WBGene00006952	ZK377.1.1	0	0.0524476
WBGene00006958	R06C1.3a.1	-0.0810362	0.0464535
WBGene00006958	R06C1.3b.1	0.0810362	0.0464535
WBGene00006962	C18A11.5b.1	-0.427104	0.0876623
WBGene00006962	C18A11.5c.1	0.442012	0.0876623
WBGene00007006	C10C6.2.1	0	0.0859141
WBGene00007008	R05D3.4a.1	0.0806064	0.0564436
WBGene00007008	R05D3.4b.1	-0.0806064	0.0564436
WBGene00007010	R10E12.1a.1	-0.0926326	0.0669331
WBGene00007010	R10E12.1b.1	0.0943892	0.0669331
WBGene00007020	Y104H12D.1a.1	0.0696282	0.0729271
WBGene00007020	Y104H12D.1b.1	-0.0696282	0.0729271
WBGene00007042	C26C6.1a.1	-0.0615299	0.0939061
WBGene00007042	C26C6.1b.1	0.0651364	0.0939061
WBGene00007057	W02D3.6.1	0	0.0664336
WBGene00007077	AC8.5	0	0.0934066
WBGene00007092	B0001.7a.1	-0.0685803	0.0719281
WBGene00007092	B0001.7b.1	-0.0627561	0.0719281
WBGene00007092	B0001.7c.1	0.131336	0.0599401
WBGene00007104	B0024.15.1	0	0.0694306
WBGene00007115	B0198.2a.1	-0.0866578	0.0949051
WBGene00007115	B0198.2b.1	-0.425789	0.0621878
WBGene00007115	B0198.2b.2	0.512447	0.0621878
WBGene00007117	B0240.2.1	0	0.0674326
WBGene00007132	B0284.2.1	0	0.0669331
WBGene00007147	B0334.9	0	0.0879121
WBGene00007154	B0365.7.1	0	0.0629371
WBGene00007164	B0391.9.1	0	0.0679321
WBGene00007172	B0393.7.1	0	0.0599401
WBGene00007174	B0395.2.1	0	0.0674326
WBGene00007175	B0395.3.1	0.0932941	0.0884116
WBGene00007175	B0395.3.3	-0.093088	0.0884116
WBGene00007191	B0491.4a.1	-0.0946644	0.0659341
WBGene00007191	B0491.4b.1	0.0946644	0.0659341
WBGene00007198	B0513.6	0	0.0969031
WBGene00007210	BE10.2.1	0	0.0709291
WBGene00007210	BE10.2.2	0	0.0709291
WBGene00007211	BE10.3.1	0	0.0909091
WBGene00007212	BE10.4.1	0	0.0634366
WBGene00007214	C01A2.2a.1	-0.511012	0.0224775
WBGene00007214	C01A2.2b.1	0.511012	0.0224775
WBGene00007218	C01A2.6.1	0	0.0899101
WBGene00007224	C01G6.2.1	-0.350759	0.0454545
WBGene00007224	C01G6.2.2	0.350759	0.0454545
WBGene00007229	C01G6.9.1	0	0.0679321
WBGene00007253	C01H6.3.1	0	0.0884116
WBGene00007281	C03E10.3.1	-0.506201	0.0639361
WBGene00007281	C03E10.3.2	-0.160466	0.0639361
WBGene00007281	C03E10.3.3	0.666667	0.0639361
WBGene00007287	C04A11.3a.1	-0.142908	0.0764236
WBGene00007287	C04A11.3b.1	0.142908	0.0764236
WBGene00007300	C04F12.6	0	0.0969031
WBGene00007314	C04H5.3.1	0	0.0734266
WBGene00007316	C04H5.8a.1	-0.15949	0.0769231
WBGene00007316	C04H5.8b.1	0.15949	0.0769231
WBGene00007321	C05B5.4.1	0	0.0929071
WBGene00007323	C05B5.6.1	0	0.0929071
WBGene00007328	C05C10.1.1	0	0.0959041
WBGene00007331	C05C10.4.1	-0.126925	0.00899101
WBGene00007331	C05C10.4.2	0.126925	0.00899101
WBGene00007332	C05C10.5a.1	-0.0492174	0.0636863
WBGene00007332	C05C10.5b.1	0.0663971	0.0636863
WBGene00007338	C05C12.6.1	0.333333	0.0799201
WBGene00007338	C05C12.6.2	-0.333333	0.0799201
WBGene00007339	C05D12.1.1	-0.240839	0.0594406
WBGene00007339	C05D12.1.2	0.240839	0.0594406
WBGene00007344	C05E7.2.1	0	0.0899101
WBGene00007346	C05E7.4.1	0	0.0659341
WBGene00007347	C05G5.1.3	-0.28806	0.0669331
WBGene00007347	C05G5.1.4	0.317505	0.0669331
WBGene00007351	C05G5.5a.1	-0.154513	0.0649351
WBGene00007351	C05G5.5b.1	0.274356	0.0649351
WBGene00007351	C05G5.5c.1	-0.119843	0.0649351
WBGene00007361	C06B3.2.1	0	0.0834166
WBGene00007375	C06C3.4.1	0	0.0894106
WBGene00007380	C06C6.6	0	0.0669331
WBGene00007381	C06C6.7.1	0	0.0989011
WBGene00007397	C07A4.2.1	0	0.0919081
WBGene00007410	C07B5.6.1	0	0.0689311
WBGene00007411	C07C7.1.1	0	0.0654346
WBGene00007416	C07E3.5.1	0.333333	0.0504496
WBGene00007416	C07E3.5.2	0	0.0504496
WBGene00007416	C07E3.5.3	-0.333333	0.0504496
WBGene00007423	C08B6.2a.1	-0.333333	0.0744256
WBGene00007423	C08B6.2b.1	0	0.0744256
WBGene00007423	C08B6.2c.1	0.333333	0.0744256
WBGene00007423	C08B6.2d.1	0	0.0744256
WBGene00007425	C08B6.4a.1	0.333333	0.042957
WBGene00007425	C08B6.4b.1	-0.333333	0.042957
WBGene00007431	C08B6.11.1	0.183677	0.0869131
WBGene00007431	C08B6.11.2	-0.183677	0.0869131
WBGene00007447	C08F8.5.1	0	0.0539461
WBGene00007452	C08F11.3.1	0	0.0869131
WBGene00007453	C08F11.5a.1	-0.271263	0.0454545
WBGene00007453	C08F11.5b.1	0.271263	0.0454545
WBGene00007454	C08F11.7.1	0.595617	0.046953
WBGene00007454	C08F11.7.2	-0.595617	0.046953
WBGene00007462	C08H9.1.1	0	0.0989011
WBGene00007466	C08H9.6.1	0	0.0564436
WBGene00007467	C08H9.7.1	0	0.0714286
WBGene00007470	C08H9.11.1	0	0.0684316
WBGene00007471	C08H9.12.1	0	0.0709291
WBGene00007472	C08H9.13.1	0	0.0649351
WBGene00007482	C09F12.2.1	0	0.0839161
WBGene00007490	C09G5.8a.1	0.577489	0.0494505
WBGene00007490	C09G5.8b.1	-0.577489	0.0494505
WBGene00007490	C09G5.8c	0	0.0494505
WBGene00007502	C09H10.8.1	0	0.0684316
WBGene00007512	C10C6.3a.1	0.197893	0.0764236
WBGene00007512	C10C6.3b.1	-0.197893	0.0764236
WBGene00007518	C11E4.3a.1	0.0460961	0.0949051
WBGene00007518	C11E4.3b.1	-0.0460961	0.0949051
WBGene00007521	C11E4.7a.1	-0.190204	0.0549451
WBGene00007521	C11E4.7b.1	0.190204	0.0549451
WBGene00007552	C13C12.2.1	-0.333333	0.0679321
WBGene00007552	C13C12.2.2	0	0.0679321
WBGene00007552	C13C12.2.3	0.333333	0.0679321
WBGene00007572	C14A6.8.1	0	0.0964036
WBGene00007577	C14B1.6a.1	-0.0655655	0.0754246
WBGene00007577	C14B1.6b.1	0.0655655	0.0754246
WBGene00007593	C14H10.3a.1	0.294591	0.0427073
WBGene00007593	C14H10.3b.2	-0.269439	0.0427073
WBGene00007595	C15A7.2.1	0	0.043956
WBGene00007607	C15C8.5.1	0	0.0684316
WBGene00007607	C15C8.5.2	0	0.0684316
WBGene00007608	C15C8.6.1	0	0.0709291
WBGene00007614	C15H11.2a.1	-0.138882	0.0949051
WBGene00007614	C15H11.2b.1	0.138882	0.0949051
WBGene00007615	C15H11.5.1	-0.164326	0.0384615
WBGene00007615	C15H11.5.2	0.164326	0.0384615
WBGene00007619	C15H11.11a.1	0.248289	0.0654346
WBGene00007619	C15H11.11b.1	-0.248289	0.0654346
WBGene00007629	C16C10.9.1	0	0.0669331
WBGene00007632	C16C10.13.1	0	0.0999001
WBGene00007641	C17E4.1a.1	-0.1936	0.0999001
WBGene00007641	C17E4.1b.1	0.1936	0.0999001
WBGene00007650	C17G1.3a.1	-0.125962	0.0604396
WBGene00007650	C17G1.3b.1	0.125962	0.0604396
WBGene00007660	C17H1.7.1	0	0.0954046
WBGene00007672	C18D4.2a.1	0	0.0719281
WBGene00007672	C18D4.2b.1	0	0.0719281
WBGene00007687	C18E9.7.1	0	0.0759241
WBGene00007694	C23H4.6a.1	-0.185616	0.0684316
WBGene00007694	C23H4.6b.1	0.185616	0.0684316
WBGene00007696	C24F3.1a.1	0.0341195	0.0994006
WBGene00007696	C24F3.1b.1	-0.0341195	0.0994006
WBGene00007701	C24H11.4.1	0	0.0639361
WBGene00007702	C24H11.5a.1	-0.0909472	0.037962
WBGene00007702	C24H11.5b.1	0.0909472	0.037962
WBGene00007703	C24H11.7a.1	-0.0970073	0.0639361
WBGene00007703	C24H11.7b.1	0.0970073	0.0639361
WBGene00007711	C25A1.12b.1	-0.0971703	0.0989011
WBGene00007711	C25A1.12c.1	0.0806397	0.0989011
WBGene00007722	C25D7.15a.1	0.462192	0.0629371
WBGene00007722	C25D7.15b.1	-0.462192	0.0629371
WBGene00007723	C25F9.2.1	0	0.043956
WBGene00007725	C25F9.5.1	0.275429	0.0544456
WBGene00007725	C25F9.5.2	-0.275429	0.0544456
WBGene00007739	C26C6.4a.1	-0.15822	0.0889111
WBGene00007739	C26C6.4b.1	0.15822	0.0889111
WBGene00007753	C27A7.1a.1	0.402001	0.0739261
WBGene00007753	C27A7.1b.1	-0.192616	0.0865801
WBGene00007753	C27A7.1c.1	-0.181127	0.0865801
WBGene00007756	C27A7.5a.1	-0.206638	0.0824176
WBGene00007756	C27A7.5e.1	0.160789	0.0824176
WBGene00007758	C27A7.8a.1	-0.605237	0.0174825
WBGene00007758	C27A7.8b.1	0.605237	0.0174825
WBGene00007776	C27C12.6.1	0	0.0674326
WBGene00007796	C28D4.10a.1	0.333333	0.0609391
WBGene00007796	C28D4.10b.1	-0.333333	0.0609391
WBGene00007807	C29F3.7a.1	-0.126142	0.0274725
WBGene00007807	C29F3.7b.1	0.126142	0.0274725
WBGene00007809	C29F4.3.1	0	0.0684316
WBGene00007811	C29F7.2a.1	-0.11042	0.0619381
WBGene00007811	C29F7.2b.1	0.11042	0.0619381
WBGene00007813	C29F7.6a.1	0.312197	0.0839161
WBGene00007813	C29F7.6b.1	-0.312197	0.0839161
WBGene00007816	C30F2.2.1	0	0.0674326
WBGene00007816	C30F2.2.2	0	0.0674326
WBGene00007829	C31A11.1.1	0	0.0719281
WBGene00007835	C31A11.7.1	0	0.0969031
WBGene00007857	C31H5.6a.1	-0.225136	0.026973
WBGene00007857	C31H5.6b.1	0.225136	0.026973
WBGene00007863	C32C4.3a.1	0.170053	0.0729271
WBGene00007863	C32C4.3c.1	-0.170053	0.0729271
WBGene00007868	C32H11.5.1	0	0.0729271
WBGene00007891	C33B4.2.1	0	0.0694306
WBGene00007897	C33D9.2.1	0	0.0969031
WBGene00007903	C33G3.3.1	0	0.0544456
WBGene00007909	C34B4.4.1	0	0.0729271
WBGene00007910	C34B4.5.1	0	0.0674326
WBGene00007919	C34C6.7a.1	0.207898	0.0709291
WBGene00007919	C34C6.7b.1	-0.207898	0.0709291
WBGene00007938	C34F6.1.1	0	0.0729271
WBGene00007939	C34F6.5a.1	-0.194852	0.0704296
WBGene00007939	C34F6.5b.1	0.194852	0.0704296
WBGene00007954	C35C5.2.1	0	0.0569431
WBGene00007960	C35D6.3.1	-0.546441	0.0619381
WBGene00007960	C35D6.3.2	0.546441	0.0619381
WBGene00007973	C36B1.6a.1	0.301152	0.0494505
WBGene00007973	C36B1.6b.1	-0.301152	0.0494505
WBGene00007975	C36B1.8b.1	0.110213	0.0434565
WBGene00007975	C36B1.8c.1	-0.12447	0.0434565
WBGene00007994	C37E2.2a.1	0.333333	0.0754246
WBGene00007994	C37E2.2b	-0.333333	0.0754246
WBGene00007998	C38C6.5	0	0.0669331
WBGene00007999	C38C6.6.1	0	0.0699301
WBGene00008007	C38D4.7.1	0	0.0719281
WBGene00008010	C38D9.2.1	0.141557	0.0874126
WBGene00008010	C38D9.2.2	-0.0124788	0.0874126
WBGene00008010	C38D9.2.3	-0.129078	0.0874126
WBGene00008010	C38D9.2.4	0	0.0874126
WBGene00008013	C38D9.5	0	0.0559441
WBGene00008017	C38D9.9.1	0	0.0659341
WBGene00008018	C38H2.1a.1	0.123713	0.0894106
WBGene00008018	C38H2.1b.1	-0.123713	0.0894106
WBGene00008021	C39B10.1.1	0	0.0679321
WBGene00008031	C39E9.7.1	0.373805	0.046953
WBGene00008031	C39E9.7.2	-0.373805	0.046953
WBGene00008043	C40H1.8.1	0	0.0934066
WBGene00008076	C43F9.9.1	0.572828	0.018981
WBGene00008076	C43F9.9.2	-0.572828	0.018981
WBGene00008077	C43F9.10.1	0	0.0989011
WBGene00008092	C44F1.2.1	0	0.0939061
WBGene00008093	C44H4.1.1	0	0.0724276
WBGene00008095	C44H4.6.1	0	0.0964036
WBGene00008096	C44H4.8.1	0	0.0974026
WBGene00008100	C44H9.5a.1	0.202582	0.0669331
WBGene00008100	C44H9.5b.1	-0.202582	0.0669331
WBGene00008102	C44H9.7a.1	0	0.0494505
WBGene00008102	C44H9.7b.1	0	0.0494505
WBGene00008117	C46F11.2b.1	0.0413889	0.0914086
WBGene00008117	C46F11.2b.2	-0.032981	0.0914086
WBGene00008127	C47A10.5a.1	0.112938	0.0899101
WBGene00008127	C47A10.5b.1	-0.112938	0.0899101
WBGene00008128	C47A10.6.1	0	0.0464535
WBGene00008147	C47E12.2.1	0.224185	0.000999001
WBGene00008147	C47E12.2.2	-0.224185	0.000999001
WBGene00008153	C47E12.10a.1	-0.304584	0.0654346
WBGene00008153	C47E12.10b.1	0.304584	0.0654346
WBGene00008176	C48B4.13.1	0	0.0894106
WBGene00008177	C48D1.1a.1	-0.383095	0.047952
WBGene00008177	C48D1.1b.1	0.383095	0.047952
WBGene00008186	C49A1.3.1	0	0.0979021
WBGene00008192	C49C3.2	0	0.0929071
WBGene00008194	C49C3.4b.1	0.136617	0.0554446
WBGene00008194	C49C3.4c.1	-0.124616	0.0554446
WBGene00008198	C49C3.8a.1	-0.114931	0.0789211
WBGene00008198	C49C3.8b.1	0.114931	0.0789211
WBGene00008200	C49C3.10a.1	0.206731	0.0494505
WBGene00008200	C49C3.10b.1	-0.206731	0.0494505
WBGene00008271	C53B4.1.1	0	0.0669331
WBGene00008300	C54D10.5.1	0	0.0734266
WBGene00008302	C54D10.8a.1	-0.333333	0.042957
WBGene00008302	C54D10.8b.1	0.333333	0.042957
WBGene00008303	C54D10.9.1	0	0.0689311
WBGene00008331	C55A6.2a.1	0.090947	0.0424575
WBGene00008331	C55A6.2b.1	-0.090947	0.0424575
WBGene00008341	C56A3.2a.1	-0.0596204	0.0574426
WBGene00008341	C56A3.2b.1	0.0596204	0.0574426
WBGene00008366	D1046.5a.1	-0.135773	0.0874126
WBGene00008366	D1046.5b.1	0.135773	0.0874126
WBGene00008368	D1053.3.1	0.889424	0.00949051
WBGene00008368	D1053.3.2	-0.889424	0.00949051
WBGene00008379	D1054.13a.1	0.0967016	0.0794206
WBGene00008379	D1054.13b.1	-0.0967016	0.0794206
WBGene00008448	E01G4.6.1	0	0.0734266
WBGene00008462	E02H4.4.1	0	0.0649351
WBGene00008476	E03H4.8.1	0.132198	0.0874126
WBGene00008476	E03H4.8.2	-0.132198	0.0874126
WBGene00008481	E04D5.2.1	0	0.0659341
WBGene00008483	E04D5.4a.1	0.193536	0.0754246
WBGene00008483	E04D5.4b.1	-0.193536	0.0754246
WBGene00008487	F01D4.3	0	0.0659341
WBGene00008496	F01D5.6.1	0	0.0729271
WBGene00008499	F01D5.9.1	0.209585	0.0464535
WBGene00008499	F01D5.9.2	-0.209585	0.0464535
WBGene00008509	F01G10.6.1	0	0.0989011
WBGene00008513	F02A9.1.1	0	0.0964036
WBGene00008537	F02H6.4a	0.230123	0.0187313
WBGene00008537	F02H6.4b	-0.246939	0.0187313
WBGene00008545	F07A11.1.1	0	0.0979021
WBGene00008559	F07H5.8.1	0	0.0554446
WBGene00008564	F08A8.1a.2	-0.24456	0.044955
WBGene00008564	F08A8.1c.1	0.221444	0.044955
WBGene00008601	F09A5.4b.1	0.238022	0.0699301
WBGene00008601	F09A5.4b.2	-0.247298	0.0699301
WBGene00008605	F09B12.1a.1	-0.380057	0.0594406
WBGene00008605	F09B12.1b.1	0.380057	0.0594406
WBGene00008609	F09B12.5.1	0	0.0544456
WBGene00008611	F09C3.3.1	0	0.0904096
WBGene00008613	F09C3.5.1	0	0.0914086
WBGene00008624	F09E8.2b.1	0.0978895	0.0729271
WBGene00008624	F09E8.2b.2	-0.103411	0.0729271
WBGene00008633	F10A3.3.1	0	0.0744256
WBGene00008657	F10F2.5	0	0.0689311
WBGene00008658	F10F2.6	0	0.0909091
WBGene00008662	F10G8.2.1	0	0.0989011
WBGene00008698	F11D11.3.1	0	0.0724276
WBGene00008727	F13A7.12.1	0	0.0729271
WBGene00008732	F13B12.4a.1	0	0.0454545
WBGene00008732	F13B12.4a.2	0	0.0454545
WBGene00008732	F13B12.4b	0	0.0454545
WBGene00008736	F13D2.2.1	0	0.0679321
WBGene00008737	F13D2.3.1	0	0.0679321
WBGene00008744	F13D12.10a.1	0.212656	0.0704296
WBGene00008744	F13D12.10b.1	-0.212656	0.0704296
WBGene00008746	F13E6.2.1	0	0.0664336
WBGene00008747	F13E6.3a.1	-0.118091	0.0824176
WBGene00008747	F13E6.3b.1	0.118091	0.0824176
WBGene00008763	F13G3.3a.1	0.108933	0.0624376
WBGene00008763	F13G3.3b.1	-0.108933	0.0624376
WBGene00008785	F14B6.4.1	0	0.0689311
WBGene00008792	F14D7.5a.1	0.333333	0.0754246
WBGene00008792	F14D7.5b.1	-0.333333	0.0754246
WBGene00008795	F14D7.8.1	0	0.0644356
WBGene00008810	F14F7.3.1	0	0.0919081
WBGene00008812	F14F7.5a.1	-0.333333	0.0494505
WBGene00008812	F14F7.5b.1	0.333333	0.0494505
WBGene00008821	F14H3.2.1	0.333333	0.0779221
WBGene00008821	F14H3.2.2	-0.333333	0.0779221
WBGene00008827	F14H3.8	0	0.043956
WBGene00008842	F15A4.8a	0.333333	0.0924076
WBGene00008842	F15A4.8b	0	0.0924076
WBGene00008842	F15A4.8c	-0.333333	0.0924076
WBGene00008847	F15A4.13.1	0	0.0649351
WBGene00008863	F15D4.6.1	0	0.0659341
WBGene00008879	F16B12.1.1	0	0.0499501
WBGene00008883	F16B12.7.1	0	0.0999001
WBGene00008889	F16D3.6.1	0	0.0644356
WBGene00008891	F16H6.1.1	0	0.043956
WBGene00008894	F16H6.4a.1	-0.266195	0.0869131
WBGene00008894	F16H6.4b.1	0.266195	0.0869131
WBGene00008899	F16H6.9.1	0	0.0494505
WBGene00008922	F17C11.11a.1	0.237518	0.00849151
WBGene00008922	F17C11.11b.1	-0.237518	0.00849151
WBGene00008923	F17C11.12a.1	-0.139063	0.0694306
WBGene00008923	F17C11.12b.1	0.139063	0.0694306
WBGene00008935	F18C12.4.1	0	0.0944056
WBGene00008937	F18E2.4.1	0	0.0884116
WBGene00008949	F19B6.3.1	0	0.0969031
WBGene00008958	F19H6.3.1	0	0.0959041
WBGene00008965	F19H8.5.1	0	0.0924076
WBGene00008977	F20D1.7.1	0	0.0694306
WBGene00008988	F20G2.5.1	0	0.0964036
WBGene00008990	F20G4.1.1	-0.0755345	0.0689311
WBGene00008990	F20G4.1.2	0.0755345	0.0689311
WBGene00009000	F21A10.4.1	0	0.0534466
WBGene00009008	F21D5.3a.1	0.30367	0.0277223
WBGene00009008	F21D5.3c.1	-0.298381	0.0277223
WBGene00009019	F21D9.5	0	0.0534466
WBGene00009020	F21D9.6	0	0.0889111
WBGene00009038	F22B3.7.1	0	0.0679321
WBGene00009041	F22B5.3.1	0	0.0969031
WBGene00009047	F22B8.4	0	0.0904096
WBGene00009049	F22B8.7.1	-0.104966	0.0924076
WBGene00009049	F22B8.7.2	0.104966	0.0924076
WBGene00009070	F23A7.5.1	0	0.0829171
WBGene00009075	F23B2.7a.1	-0.204771	0.0589411
WBGene00009075	F23B2.7b.1	0.204771	0.0589411
WBGene00009084	F23B12.7.1	0.0915241	0.0374625
WBGene00009084	F23B12.7.2	-0.0915241	0.0374625
WBGene00009094	F23H12.5.1	0	0.0669331
WBGene00009097	F23H12.9a.1	-0.142831	0.0504496
WBGene00009097	F23H12.9b.1	0.142831	0.0504496
WBGene00009100	F25B3.3a.1	-0.418755	0.0604396
WBGene00009100	F25B3.3b.1	0.418755	0.0604396
WBGene00009114	F25D7.5.1	0	0.043956
WBGene00009117	F25H2.3.1	0	0.0514486
WBGene00009124	F25H2.13.1	0.153405	0.0284715
WBGene00009124	F25H2.13.2	-0.153405	0.0284715
WBGene00009127	F25H5.5a.1	-0.0768367	0.0634366
WBGene00009127	F25H5.5b.1	0.0768367	0.0634366
WBGene00009144	F26A3.6.1	0	0.0874126
WBGene00009149	F26D2.10.1	-0.333333	0.0819181
WBGene00009149	F26D2.10.2	0.333333	0.0819181
WBGene00009153	F26D2.15.1	0	0.0669331
WBGene00009162	F26E4.7a.1	-0.165522	0.0749251
WBGene00009162	F26E4.7b.1	0.165522	0.0749251
WBGene00009166	F26F2.1.1	0	0.0654346
WBGene00009173	F26H9.1a.1	0.0867278	0.0404595
WBGene00009173	F26H9.1b.1	-0.0867278	0.0404595
WBGene00009180	F26H11.2f.1	-0.16135	0.0957376
WBGene00009180	F26H11.2j.1	-0.197193	0.0957376
WBGene00009180	F26H11.2r.3	0.13063	0.0957376
WBGene00009197	F28B1.3	0	0.043956
WBGene00009204	F28C6.4a.2	-0.453977	0.003996
WBGene00009204	F28C6.4a.3	0.472417	0.003996
WBGene00009207	F28C6.8a.1	0.0992547	0.0244755
WBGene00009207	F28C6.8b.1	-0.0992547	0.0244755
WBGene00009223	F28F8.5a.1	0.0354183	0.0989011
WBGene00009223	F28F8.5b.1	-0.0354183	0.0989011
WBGene00009225	F28F8.8a.1	0.25245	0.0899101
WBGene00009225	F28F8.8b.1	-0.25245	0.0899101
WBGene00009226	F28G4.1.1	0	0.0744256
WBGene00009232	F28H6.3.1	0	0.0659341
WBGene00009250	F29D10.1.1	0	0.0669331
WBGene00009252	F29D10.3.1	0	0.0919081
WBGene00009257	F29G6.1.1	0	0.0534466
WBGene00009258	F29G6.2.1	0	0.0809191
WBGene00009278	F31B9.1.1	0	0.0649351
WBGene00009299	F31E9.6.1	0	0.0644356
WBGene00009309	F32A11.4	0	0.0679321
WBGene00009320	F32B6.3.1	0.155869	0.023976
WBGene00009320	F32B6.3.2	-0.155869	0.023976
WBGene00009326	F32D8.1.1	0	0.0934066
WBGene00009330	F32D8.5a.1	0.0771646	0.0754246
WBGene00009330	F32D8.5b.1	-0.0771646	0.0754246
WBGene00009331	F32D8.7a.1	0.82825	0.042957
WBGene00009331	F32D8.7b.1	-0.82825	0.042957
WBGene00009343	F32H2.6.1	0	0.0914086
WBGene00009349	F32H5.3a.1	-0.117699	0.0864136
WBGene00009349	F32H5.3b.1	0.117699	0.0864136
WBGene00009350	F32H5.4.1	-0.157563	0.0809191
WBGene00009350	F32H5.4.2	0.157563	0.0809191
WBGene00009356	F33A8.10.1	0	0.0544456
WBGene00009370	F33H2.7.1	0.221769	0.0414585
WBGene00009370	F33H2.7.2	-0.221769	0.0414585
WBGene00009371	F33H2.8a.1	0.111153	0.0974026
WBGene00009371	F33H2.8b.1	-0.111153	0.0974026
WBGene00009381	F34H10.4a.1	0.333333	0.0404595
WBGene00009381	F34H10.4b.1	-0.333333	0.0404595
WBGene00009382	F34H10.5.1	0.149875	0.0899101
WBGene00009382	F34H10.5.2	-0.149875	0.0899101
WBGene00009395	F35C5.7.1	0	0.0574426
WBGene00009399	F35C5.11.1	0	0.0659341
WBGene00009401	F35C11.2.1	0	0.0704296
WBGene00009402	F35C11.3.1	-0.555395	0.0334665
WBGene00009402	F35C11.3.2	0.555395	0.0334665
WBGene00009410	F35E2.2.1	0	0.0674326
WBGene00009415	F35E2.8.1	0	0.0649351
WBGene00009423	F35E8.10.1	0	0.0704296
WBGene00009426	F35E12.2a.1	0	0.0689311
WBGene00009426	F35E12.2b.1	0	0.0689311
WBGene00009430	F35E12.6.1	-0.125319	0.0154845
WBGene00009430	F35E12.6.2	0.125319	0.0154845
WBGene00009434	F35E12.10.1	-0.167168	0.0184815
WBGene00009434	F35E12.10.2	0.167168	0.0184815
WBGene00009465	F36D1.6.1	0	0.0709291
WBGene00009465	F36D1.6.2	0	0.0709291
WBGene00009471	F36D3.5.1	0.428478	0.0404595
WBGene00009471	F36D3.5.2	-0.428478	0.0404595
WBGene00009487	F36G9.11.1	0	0.0694306
WBGene00009489	F36G9.13.1	0	0.0919081
WBGene00009491	F36G9.15.1	0	0.0659341
WBGene00009491	F36G9.15.2	0	0.0659341
WBGene00009498	F36H2.1b.1	0.101216	0.0669331
WBGene00009498	F36H2.1d.1	-0.116897	0.0669331
WBGene00009509	F37D6.3.1	0	0.0904096
WBGene00009512	F37H8.3a.1	0.23007	0.0394605
WBGene00009512	F37H8.3b.1	-0.23007	0.0394605
WBGene00009517	F38A1.4.1	0	0.0719281
WBGene00009530	F38B2.3a.1	0	0.0684316
WBGene00009530	F38B2.3b.1	0	0.0684316
WBGene00009531	F38B2.4a.1	-0.0393318	0.0914086
WBGene00009531	F38B2.4b	0.0393318	0.0914086
WBGene00009541	F38E11.4.1	0	0.048951
WBGene00009550	F38H4.6.1	-0.304589	0.047952
WBGene00009550	F38H4.6.2	0.304589	0.047952
WBGene00009573	F40E10.5.1	0	0.0874126
WBGene00009597	F40G12.2.1	0	0.0669331
WBGene00009601	F40G12.6.1	0	0.0649351
WBGene00009602	F40G12.7.1	0	0.0694306
WBGene00009614	F41D3.9.1	0	0.0699301
WBGene00009618	F41E7.2.1	-0.247396	0.0624376
WBGene00009618	F41E7.2.2	0.247396	0.0624376
WBGene00009619	F41E7.3.1	0	0.0704296
WBGene00009622	F41E7.6.1	0	0.0989011
WBGene00009670	F43G9.8.1	-0.333333	0.0679321
WBGene00009670	F43G9.8.2	0.333333	0.0679321
WBGene00009678	F44D12.1a.1	-0.418146	0.011988
WBGene00009678	F44D12.1b.1	0.418146	0.011988
WBGene00009689	F44E5.2.1	0	0.0499501
WBGene00009690	F44E5.3	0	0.043956
WBGene00009693	F44F1.1	0	0.045954
WBGene00009698	F44F1.6a.1	0.303519	0.0679321
WBGene00009698	F44F1.6b.1	-0.303519	0.0679321
WBGene00009702	F44F4.3.1	0	0.0914086
WBGene00009710	F44G3.10.1	0	0.0699301
WBGene00009715	F44G4.6a.1	0.26956	0.0724276
WBGene00009715	F44G4.6b.1	-0.26956	0.0724276
WBGene00009722	F45D3.2a.1	0.12983	0.0944056
WBGene00009722	F45D3.2b.1	-0.12983	0.0944056
WBGene00009729	F45E10.2a.1	0.169901	0.0699301
WBGene00009729	F45E10.2b.1	-0.169901	0.0699301
WBGene00009739	F45H10.2.1	0.0910959	0.0244755
WBGene00009739	F45H10.2.2	-0.0910959	0.0244755
WBGene00009742	F45H10.5.1	0.00743139	0.0684316
WBGene00009742	F45H10.5.2	0.0892719	0.0684316
WBGene00009742	F45H10.5.3	0	0.0684316
WBGene00009742	F45H10.5.4	0.193281	0.0684316
WBGene00009742	F45H10.5.5	-0.289985	0.0684316
WBGene00009759	F46B3.4a.1	-0.198021	0.0659341
WBGene00009759	F46B3.4b.1	0.198021	0.0659341
WBGene00009805	F47B8.4a.1	0.180047	0.0604396
WBGene00009805	F47B8.4b.1	-0.180047	0.0604396
WBGene00009806	F47B8.5a.1	-0.208609	0.0634366
WBGene00009806	F47B8.5b.1	0.208609	0.0634366
WBGene00009819	F47B10.8a.1	0.666667	0.0644356
WBGene00009819	F47B10.8b.1	-0.714537	0.0644356
WBGene00009819	F47B10.8c.1	-0.205884	0.0644356
WBGene00009819	F47B10.8d.1	0.253755	0.0644356
WBGene00009823	F47G4.2.1	0.110962	0.0949051
WBGene00009823	F47G4.2.2	-0.110962	0.0949051
WBGene00009835	F47H4.2a.1	0	0.0669331
WBGene00009835	F47H4.2b.1	0	0.0669331
WBGene00009838	F47H4.7a	0.333333	0.0679321
WBGene00009838	F47H4.7b	-0.333333	0.0679321
WBGene00009844	F48C11.2a.1	-0.333333	0.0519481
WBGene00009844	F48C11.2b.1	0.333333	0.0519481
WBGene00009846	F48F5.2	0	0.0914086
WBGene00009848	F48F5.6a.1	-0.482723	0.0849151
WBGene00009848	F48F5.6a.2	0.408281	0.0849151
WBGene00009852	F48F7.7.1	0	0.0534466
WBGene00009855	F49A5.3.1	0	0.0669331
WBGene00009857	F49A5.5a.1	0	0.0749251
WBGene00009857	F49A5.5b.1	0	0.0749251
WBGene00009861	F49B2.1.1	0	0.0929071
WBGene00009865	F49B2.6.1	0	0.0754246
WBGene00009879	F49C12.10.1	0	0.0729271
WBGene00009885	F49E2.1a.1	-0.274872	0.0966533
WBGene00009885	F49E2.1b.1	0.258311	0.0966533
WBGene00009889	F49E11.2.1	0	0.0899101
WBGene00009893	F49E11.7.1	0.172167	0.0839161
WBGene00009893	F49E11.7.2	-0.172167	0.0839161
WBGene00009916	F52A8.3a.1	0.276984	0.0854146
WBGene00009916	F52A8.3b.1	-0.333333	0.0854146
WBGene00009916	F52A8.3b.2	0.0563491	0.0854146
WBGene00009935	F52E10.4a.1	0.222571	0.0932401
WBGene00009935	F52E10.4b.1	-0.616334	0.0799201
WBGene00009935	F52E10.4c.1	0.393763	0.0909091
WBGene00009939	F52F12.6a.1	0.229626	0.0454545
WBGene00009939	F52F12.6b.1	-0.229626	0.0454545
WBGene00009950	F53A2.2.1	0	0.0539461
WBGene00009959	F53B6.4a.1	0.136018	0.0744256
WBGene00009959	F53B6.4b.1	-0.136018	0.0744256
WBGene00009961	F53B6.6.1	0	0.0614386
WBGene00009965	F53B7.2a.1	0.419425	0.0534466
WBGene00009965	F53B7.2b.1	-0.419425	0.0534466
WBGene00009968	F53B7.5a.1	-0.128998	0.0939061
WBGene00009968	F53B7.5b.1	0.128998	0.0939061
WBGene00009972	F53C11.2	0	0.0964036
WBGene00009974	F53C11.4a.1	0.182561	0.012987
WBGene00009974	F53C11.4a.2	-0.0853057	0.041958
WBGene00009974	F53C11.4b.1	0.116828	0.033966
WBGene00009974	F53C11.4b.2	-0.214083	0.012987
WBGene00009975	F53C11.5a.1	-0.0509358	0.0981518
WBGene00009975	F53C11.5c.1	0.0583466	0.0981518
WBGene00009976	F53C11.7.1	-0.102396	0.0759241
WBGene00009976	F53C11.7.2	0.102396	0.0759241
WBGene00009983	F53F1.5.1	0	0.0704296
WBGene00009985	F53F4.1.1	0	0.0649351
WBGene00009996	F53F4.14.1	0.185498	0.00799201
WBGene00009996	F53F4.14.2	-0.185498	0.00799201
WBGene00010003	F53F8.6a.1	-0.229282	0.0784216
WBGene00010003	F53F8.6b.1	0.229282	0.0784216
WBGene00010009	F53H4.4.1	-0.354774	0.042957
WBGene00010009	F53H4.4.2	0.354774	0.042957
WBGene00010018	F54B8.3.1	0.164561	0.0839161
WBGene00010018	F54B8.3.2	-0.164561	0.0839161
WBGene00010019	F54B8.4a.1	0.200923	0.0724276
WBGene00010019	F54B8.4b.1	-0.200923	0.0724276
WBGene00010031	F54B11.8.1	0	0.0714286
WBGene00010032	F54B11.9.1	0	0.0754246
WBGene00010060	F54E4.4.1	0	0.0704296
WBGene00010061	F54E12.2.1	-0.0561101	0.0509491
WBGene00010061	F54E12.2.2	0.0561101	0.0509491
WBGene00010062	F54F3.3.1	0	0.0724276
WBGene00010068	F54F7.8.1	0	0.0669331
WBGene00010069	F54F11.1.1	0	0.046953
WBGene00010096	F55C5.7a.1	-0.0553921	0.0749251
WBGene00010096	F55C5.7b.1	0.0553921	0.0749251
WBGene00010099	F55C9.1.1	0	0.0919081
WBGene00010104	F55C9.7.1	0	0.0734266
WBGene00010106	F55C9.10.1	0	0.0694306
WBGene00010110	F55D12.1.1	-0.114747	0.0899101
WBGene00010110	F55D12.1.2	0.114747	0.0899101
WBGene00010111	F55D12.2a.1	-0.12679	0.0994006
WBGene00010111	F55D12.2b.1	0.12679	0.0994006
WBGene00010118	F55F3.4a.1	0	0.0509491
WBGene00010118	F55F3.4b.1	0	0.0509491
WBGene00010122	F55G11.1.1	0	0.0919081
WBGene00010127	F55G11.7.1	0	0.0524476
WBGene00010138	F56A8.1a.1	-0.333333	0.0604396
WBGene00010138	F56A8.1b.1	0.333333	0.0604396
WBGene00010146	F56C4.3a.1	0.502568	0.0649351
WBGene00010146	F56C4.3b.1	0.318031	0.0649351
WBGene00010146	F56C4.3c	-0.547953	0.0649351
WBGene00010146	F56C4.3d	-0.272646	0.0649351
WBGene00010147	F56D5.2.1	0	0.0834166
WBGene00010157	F56G4.1.1	0	0.0564436
WBGene00010167	F56H6.6.1	0	0.0524476
WBGene00010182	F57A8.7.1	0	0.0494505
WBGene00010187	F57B1.1.1	0	0.0999001
WBGene00010191	F57B7.1a.1	0.283314	0.0559441
WBGene00010191	F57B7.1b.1	-0.283314	0.0559441
WBGene00010198	F57C2.6a.1	-0.0624562	0.0949051
WBGene00010198	F57C2.6b.1	-0.0900522	0.0891608
WBGene00010198	F57C2.6c.1	0.152508	0.0809191
WBGene00010200	F57C7.4.1	0	0.0744256
WBGene00010202	F57E7.1a.1	-0.333333	0.0824176
WBGene00010202	F57E7.1b.1	0.333333	0.0824176
WBGene00010219	F57G9.3.1	0	0.0924076
WBGene00010242	F58D5.2b.1	0.217254	0.0874126
WBGene00010242	F58D5.2b.4	-0.249948	0.0874126
WBGene00010245	F58D5.6	0	0.0719281
WBGene00010247	F58D5.8.1	0	0.0879121
WBGene00010250	F58D12.3.1	0	0.042957
WBGene00010259	F58E10.1b.1	-0.0892733	0.0981518
WBGene00010259	F58E10.1c.1	0.0878988	0.0981518
WBGene00010271	F58G1.9	0	0.0669331
WBGene00010275	F58G6.4a.1	0.398458	0.0724276
WBGene00010275	F58G6.4a.2	0	0.0724276
WBGene00010275	F58G6.4b.1	-0.398458	0.0724276
WBGene00010282	F58G11.4a.1	-0.4663	0.0724276
WBGene00010282	F58G11.4b.1	0.4663	0.0724276
WBGene00010286	F58H1.3a.1	-0.174139	0.01998
WBGene00010286	F58H1.3b	0.174139	0.01998
WBGene00010290	F58H1.7a.1	-0.215982	0.0524476
WBGene00010290	F58H1.7b.1	0.215982	0.0524476
WBGene00010293	F59A1.7.1	0.413983	0.00699301
WBGene00010293	F59A1.7.2	-0.413983	0.00699301
WBGene00010303	F59A2.3.1	0.0448888	0.0494505
WBGene00010303	F59A2.3.2	-0.0448888	0.0494505
WBGene00010310	F59B2.8.1	0	0.0924076
WBGene00010313	F59B2.11	0	0.0699301
WBGene00010315	F59B2.13a.1	0.182913	0.0679321
WBGene00010315	F59B2.13b.1	-0.182913	0.0679321
WBGene00010319	F59B10.3.1	0	0.0694306
WBGene00010320	F59B10.4a.1	0.183548	0.0939061
WBGene00010320	F59B10.4b.1	-0.183548	0.0939061
WBGene00010327	F59C6.8.1	0	0.0644356
WBGene00010331	F59D12.3.1	0	0.0704296
WBGene00010342	F59F5.3.1	0	0.0834166
WBGene00010344	F59F5.5.1	0	0.0954046
WBGene00010345	F59F5.7.1	0	0.0619381
WBGene00010363	H04D03.2a.1	-0.147663	0.0254745
WBGene00010363	H04D03.2b.1	0.147663	0.0254745
WBGene00010370	H06O01.3a.1	-0.0949968	0.0839161
WBGene00010370	H06O01.3b.1	0.0949968	0.0839161
WBGene00010375	H09F14.1a.1	0.167896	0.0979021
WBGene00010375	H09F14.1b.1	0	0.0979021
WBGene00010375	H09F14.1c.1	0.062993	0.0979021
WBGene00010375	H09F14.1d.1	0	0.0979021
WBGene00010375	H09F14.1e.1	-0.230889	0.0979021
WBGene00010378	H12D21.2a.1	0.333333	0.0404595
WBGene00010378	H12D21.2b.1	-0.333333	0.0404595
WBGene00010385	H12D21.9a.1	0.613913	0.0484515
WBGene00010385	H12D21.9b.1	-0.613913	0.0484515
WBGene00010386	H12D21.10a.1	-0.157276	0.0804196
WBGene00010386	H12D21.10b.1	0.157276	0.0804196
WBGene00010391	H12I19.4a.1	0	0.048951
WBGene00010391	H12I19.4b	0	0.048951
WBGene00010401	H16D19.3.1	0	0.0684316
WBGene00010407	H19N07.3a.1	0.0883135	0.0584416
WBGene00010407	H19N07.3b.1	-0.0883135	0.0584416
WBGene00010408	H19N07.4a.1	-0.0589225	0.0869131
WBGene00010408	H19N07.4b.1	0.0589225	0.0869131
WBGene00010447	K01A6.5a.1	0	0.0924076
WBGene00010447	K01A6.5a.2	0.307768	0.0924076
WBGene00010447	K01A6.5b	-0.307768	0.0924076
WBGene00010451	K01A11.3.1	0	0.0909091
WBGene00010487	K02A11.2.1	0	0.0839161
WBGene00010499	K02B12.6.1	0	0.0899101
WBGene00010501	K02C4.2.1	0	0.0659341
WBGene00010505	K02D3.2.1	0	0.0889111
WBGene00010508	K02E2.7a.1	0	0.0574426
WBGene00010508	K02E2.7b.1	0	0.0574426
WBGene00010508	K02E2.7c.1	0	0.0574426
WBGene00010508	K02E2.7d.1	0	0.0574426
WBGene00010521	K03A11.4.1	0	0.0719281
WBGene00010544	K03H1.9.1	-0.232187	0.0679321
WBGene00010544	K03H1.9.2	0.56552	0.0679321
WBGene00010544	K03H1.9.3	-0.333333	0.0679321
WBGene00010573	K04H4.2a.1	0.078371	0.0704296
WBGene00010573	K04H4.2b.1	0.138673	0.0704296
WBGene00010573	K04H4.2c.1	-0.217044	0.0704296
WBGene00010578	K04H8.3.1	0	0.0979021
WBGene00010580	K05C4.3.1	0	0.0564436
WBGene00010580	K05C4.3.2	0	0.0564436
WBGene00010585	K05C4.9a.1	-0.296298	0.0829171
WBGene00010585	K05C4.9b.1	0.296298	0.0829171
WBGene00010589	K05D4.4.1	0	0.0724276
WBGene00010592	K06A4.2a.1	0.95189	0.0599401
WBGene00010592	K06A4.2b.1	-0.333333	0.0599401
WBGene00010592	K06A4.2c	-0.618557	0.0599401
WBGene00010604	K06B4.10.1	0	0.043956
WBGene00010605	K06G5.1.1	0.0422429	0.0759241
WBGene00010605	K06G5.1.2	-0.0422429	0.0759241
WBGene00010614	K07A1.7.1	0	0.0984016
WBGene00010642	K07G5.3.1	0	0.0954046
WBGene00010643	K07G5.4.1	0	0.0879121
WBGene00010658	K08D8.4a.1	0.282496	0.0764236
WBGene00010658	K08D8.4f	-0.295028	0.0764236
WBGene00010666	K08E4.2a.1	0.254233	0.0184815
WBGene00010666	K08E4.2b.1	-0.254233	0.0184815
WBGene00010669	K08E4.5a.1	0	0.0709291
WBGene00010669	K08E4.5b.1	0	0.0709291
WBGene00010673	K08E7.5a.1	-0.64268	0.0684316
WBGene00010673	K08E7.5b.1	0.16854	0.0684316
WBGene00010673	K08E7.5c.1	0	0.0684316
WBGene00010673	K08E7.5d.1	0	0.0684316
WBGene00010673	K08E7.5e.1	0.47414	0.0684316
WBGene00010681	K08F8.1a.1	0.16731	0.00624376
WBGene00010681	K08F8.1b.1	-0.204296	0.0024975
WBGene00010684	K08F9.1a.1	0.271633	0.0944056
WBGene00010684	K08F9.1b.1	-0.271633	0.0944056
WBGene00010694	K08H2.9.1	0	0.0714286
WBGene00010707	K09A11.4.1	0	0.0669331
WBGene00010709	K09B11.2a.1	0.0635948	0.0969031
WBGene00010709	K09B11.2b.1	-0.0635948	0.0969031
WBGene00010712	K09B11.5a.1	0.33236	0.0584416
WBGene00010712	K09B11.5b.1	-0.33236	0.0584416
WBGene00010716	K09C8.4.1	0	0.0569431
WBGene00010722	K09E4.4.1	0.333333	0.0754246
WBGene00010722	K09E4.4.2	-0.333333	0.0754246
WBGene00010732	K10C3.5a.1	0.0654099	0.0924076
WBGene00010732	K10C3.5b.1	-0.0654099	0.0924076
WBGene00010741	K10D6.1.1	0	0.0514486
WBGene00010754	K10G4.5.1	0	0.0529471
WBGene00010768	K11D2.1a.2	-0.333333	0.0974026
WBGene00010768	K11D2.1b.1	0.277982	0.0974026
WBGene00010789	K12G11.2.1	0	0.0939061
WBGene00010792	K12G11.6.1	0	0.0674326
WBGene00010794	LLC1.3a.1	-0.0425112	0.035964
WBGene00010794	LLC1.3b.1	0.0425112	0.035964
WBGene00010814	M01F1.8a.1	-0.0651487	0.0704296
WBGene00010814	M01F1.8b.1	0.0651487	0.0704296
WBGene00010830	M02G9.1a.1	0.333333	0.0424575
WBGene00010830	M02G9.1b.1	-0.333333	0.0424575
WBGene00010835	M03B6.3.1	0	0.0669331
WBGene00010855	M04C7.4.1	0	0.0984016
WBGene00010856	M04C9.1a.1	-0.118393	0.0934066
WBGene00010856	M04C9.1b.1	0.118393	0.0934066
WBGene00010857	M04C9.2.1	0	0.0514486
WBGene00010864	M04D8.6.1	0	0.0734266
WBGene00010874	M05D6.1.1	0.385243	0.035964
WBGene00010874	M05D6.1.2	-0.385243	0.035964
WBGene00010878	M05D6.5a.1	-0.0896744	0.0614386
WBGene00010878	M05D6.5b.1	0.0896744	0.0614386
WBGene00010893	M28.1.1	0	0.0434565
WBGene00010895	M28.4.1	0	0.0719281
WBGene00010898	M28.7.1	0	0.0509491
WBGene00010936	M163.2a.1	-0.333333	0.0569431
WBGene00010936	M163.2b.1	0.333333	0.0569431
WBGene00010937	M163.5.1	0	0.043956
WBGene00010948	M195.2a.1	0	0.0524476
WBGene00010948	M195.2b.1	-0.333333	0.0524476
WBGene00010948	M195.2c.1	-0.666667	0.0524476
WBGene00010948	M195.2d.1	1	0
WBGene00010971	R01E6.7.1	0	0.0879121
WBGene00010984	R03A10.4a.1	-0.155841	0.0454545
WBGene00010984	R03A10.4b.1	0.155841	0.0454545
WBGene00010986	R03A10.6.1	0	0.0689311
WBGene00010987	R03C1.1a.1	-0.333333	0.0524476
WBGene00010987	R03C1.1b.1	0.333333	0.0524476
WBGene00010989	R03D7.2.1	0	0.0704296
WBGene00010991	R03D7.5a.1	0.0927779	0.0964036
WBGene00010991	R03D7.5b.1	-0.0927779	0.0964036
WBGene00010998	R03G8.3.1	0.253973	0.0959041
WBGene00010998	R03G8.3.2	-0.293534	0.0959041
WBGene00010999	R03G8.4	0	0.0919081
WBGene00011014	R04F11.1.1	0	0.0924076
WBGene00011030	R05D7.5b.1	0.17242	0.0681818
WBGene00011030	R05D7.5c.1	-0.213419	0.0681818
WBGene00011041	R05H5.7.1	0	0.0909091
WBGene00011046	R05H10.7.1	0	0.0709291
WBGene00011051	R06A4.9a.1	0.0843014	0.0951548
WBGene00011051	R06A4.9b.1	-0.0858011	0.0951548
WBGene00011052	R06B9.1.1	0	0.043956
WBGene00011081	R07B1.9.1	0	0.0524476
WBGene00011088	R07B7.4a.1	0.289036	0.0726773
WBGene00011088	R07B7.4b.1	-0.331341	0.0726773
WBGene00011097	R07B7.13a.1	-0.237627	0.0669331
WBGene00011097	R07B7.13b.1	0.237627	0.0669331
WBGene00011098	R07B7.14.1	0	0.0734266
WBGene00011099	R07B7.15.1	0	0.0759241
WBGene00011101	R07D5.2.1	0	0.0679321
WBGene00011103	R07E3.2.1	0	0.0959041
WBGene00011106	R07E3.5a.1	-0.169058	0.0444555
WBGene00011106	R07E3.5b.1	0.169058	0.0444555
WBGene00011121	R07E5.17.1	0	0.0734266
WBGene00011122	R07H5.2a.1	-0.162635	0.00599401
WBGene00011122	R07H5.2c.1	0.135205	0.00824176
WBGene00011131	R07H5.11a.1	-0.14206	0.0564436
WBGene00011131	R07H5.11b.1	0.14206	0.0564436
WBGene00011137	R08A2.7.1	0	0.0979021
WBGene00011171	R09E10.1.1	-0.0818791	0.0984016
WBGene00011171	R09E10.1.2	0.0818791	0.0984016
WBGene00011174	R09E10.4	0	0.0729271
WBGene00011175	R09E10.5.1	0	0.0729271
WBGene00011178	R09E10.9	0	0.0729271
WBGene00011179	R09H10.1.1	0	0.0714286
WBGene00011194	R10D12.13b.1	-0.0832661	0.0861638
WBGene00011194	R10D12.13c.1	0.10557	0.0861638
WBGene00011198	R10E4.1.1	0.101135	0.0714286
WBGene00011198	R10E4.1.2	-0.101135	0.0714286
WBGene00011209	R10E8.3.1	0	0.0749251
WBGene00011221	R10E12.2.1	-0.183685	0.0519481
WBGene00011221	R10E12.2.2	0.183685	0.0519481
WBGene00011238	R11A8.3.1	0	0.0669331
WBGene00011251	R11H6.3a.1	0	0.0654346
WBGene00011251	R11H6.3b.1	-0.333333	0.0654346
WBGene00011251	R11H6.3c.1	0.333333	0.0654346
WBGene00011252	R11H6.4a.1	-0.197184	0.0974026
WBGene00011252	R11H6.4b.1	0.137616	0.0981518
WBGene00011254	R12G8.1.1	0	0.0674326
WBGene00011261	R13H4.1.1	0	0.0499501
WBGene00011265	R13H4.7a.1	0.0893625	0.0664336
WBGene00011265	R13H4.7b.1	-0.0893625	0.0664336
WBGene00011288	R102.1.1	0	0.0754246
WBGene00011294	R102.7	0	0.0584416
WBGene00011300	R107.5a.1	-0.189794	0.00499501
WBGene00011300	R107.5b.1	0.189794	0.00499501
WBGene00011321	T01C3.4.1	0	0.0774226
WBGene00011344	T01G9.2a.1	-0.0594975	0.0924076
WBGene00011344	T01G9.2b.1	0.0594975	0.0924076
WBGene00011345	T01G9.3.1	0	0.0964036
WBGene00011354	T01H10.1.1	0	0.0759241
WBGene00011371	T02D1.4.1	0	0.0594406
WBGene00011382	T02E9.3a.1	-0.333333	0.0514486
WBGene00011382	T02E9.3b.1	0.333333	0.0514486
WBGene00011447	T04F8.9.1	0	0.0644356
WBGene00011453	T04H1.8.1	0	0.0494505
WBGene00011456	T05A1.5a.1	0.333333	0.0864136
WBGene00011456	T05A1.5b.1	-0.333333	0.0864136
WBGene00011471	T05C12.8.1	0	0.0734266
WBGene00011472	T05C12.9.1	0	0.0874126
WBGene00011479	T05E11.2a.1	0.182094	0.0689311
WBGene00011479	T05E11.2b.1	-0.182094	0.0689311
WBGene00011492	T05F1.7.1	0	0.0804196
WBGene00011494	T05F1.9.1	0	0.0914086
WBGene00011520	T06C12.13a.1	0.278168	0.0844156
WBGene00011520	T06C12.13b.1	-0.278168	0.0844156
WBGene00011523	T06D8.2.1	0	0.0569431
WBGene00011529	T06D8.9.1	-0.221657	0.00549451
WBGene00011529	T06D8.9.2	0.221657	0.00549451
WBGene00011539	T06E6.5.1	0	0.0724276
WBGene00011543	T06E8.1a.1	0.0635145	0.0454545
WBGene00011543	T06E8.1b.1	-0.0635145	0.0454545
WBGene00011545	T06G6.3a.1	0.333333	0.0664336
WBGene00011545	T06G6.3b.1	-0.333333	0.0664336
WBGene00011549	T06G6.8	0	0.0434565
WBGene00011551	T06G6.12.1	0	0.0924076
WBGene00011557	T07A5.4	0	0.0704296
WBGene00011587	T07F10.1a.1	0.154185	0.0564436
WBGene00011587	T07F10.1b.1	-0.154185	0.0564436
WBGene00011593	T07G12.2.1	0	0.0544456
WBGene00011596	T07G12.5a.1	0.529941	0.0634366
WBGene00011596	T07G12.5b.1	-0.0638557	0.0634366
WBGene00011596	T07G12.5c.1	-0.466085	0.0634366
WBGene00011624	T08G5.3a.1	-0.152644	0.0989011
WBGene00011624	T08G5.3b.1	0.152644	0.0989011
WBGene00011630	T08G11.3.1	0	0.0564436
WBGene00011643	T09B9.2.1	0	0.0714286
WBGene00011671	T10B9.1.1	0	0.0484515
WBGene00011673	T10B9.3.1	0	0.0804196
WBGene00011677	T10B9.8.1	-0.666667	0.0494505
WBGene00011677	T10B9.8.2	0.666667	0.0494505
WBGene00011682	T10B10.5.1	0	0.0634366
WBGene00011688	T10C6.6a.1	-0.155113	0.0879121
WBGene00011688	T10C6.6a.2	0.133271	0.0879121
WBGene00011690	T10C6.9	0	0.0884116
WBGene00011704	T11A5.5.1	0	0.0879121
WBGene00011717	T11G6.2a.1	0.65098	0.000499501
WBGene00011717	T11G6.2b.1	-0.65098	0.000499501
WBGene00011754	T13F3.7.1	0	0.0664336
WBGene00011756	T13H5.2a.1	0.251706	0.0414585
WBGene00011756	T13H5.2b.1	-0.251706	0.0414585
WBGene00011757	T13H5.3.1	0	0.0924076
WBGene00011762	T13H10.2.1	0	0.0614386
WBGene00011763	T14B1.1.1	-0.57595	0.0561938
WBGene00011763	T14B1.1.2	0.57595	0.0561938
WBGene00011786	T15D6.12.1	0	0.0694306
WBGene00011795	T16A9.5.1	0.0820493	0.0909091
WBGene00011795	T16A9.5.2	-0.0820493	0.0909091
WBGene00011796	T16G1.2a.1	0	0.0704296
WBGene00011796	T16G1.2b.1	0	0.0704296
WBGene00011799	T16G1.5.1	0	0.0989011
WBGene00011810	T16G12.9a.1	-0.333333	0.0769231
WBGene00011810	T16G12.9c.1	0.333333	0.0769231
WBGene00011846	T19H5.1a.1	0.333333	0.0769231
WBGene00011846	T19H5.1b.1	-0.333333	0.0769231
WBGene00011868	T20G5.4a.1	-0.266533	0.0334665
WBGene00011868	T20G5.4b.1	0.266533	0.0334665
WBGene00011874	T20G5.13.1	0	0.0499501
WBGene00011878	T21B4.4a.1	0.333333	0.043956
WBGene00011878	T21B4.4b.1	-0.333333	0.043956
WBGene00011896	T21C9.11.1	0	0.0724276
WBGene00011897	T21C9.12a.1	0.0742366	0.0334665
WBGene00011897	T21C9.12b.1	-0.0742366	0.0334665
WBGene00011923	T22C8.2.2	-0.380726	0.0719281
WBGene00011923	T22C8.2.3	0.278291	0.0719281
WBGene00011926	T22C8.5.1	0	0.0989011
WBGene00011927	T22C8.6.1	0	0.0914086
WBGene00011931	T22G5.4.1	0	0.0794206
WBGene00011939	T23B5.1a.1	0.0359255	0.0959041
WBGene00011939	T23B5.1b.1	-0.0359255	0.0959041
WBGene00011948	T23F1.5.1	0	0.043956
WBGene00011955	T23F11.3a.1	0.169664	0.0764236
WBGene00011955	T23F11.3b.1	-0.169664	0.0764236
WBGene00011973	T23G11.10.1	0	0.0679321
WBGene00012009	T25B9.3a.1	0.333333	0.0674326
WBGene00012009	T25B9.3b.1	-0.333333	0.0674326
WBGene00012032	T26C5.2.1	0	0.0719281
WBGene00012040	T26E3.7.1	0	0.0679321
WBGene00012040	T26E3.7.2	0	0.0679321
WBGene00012046	T26E4.4.1	0	0.0739261
WBGene00012063	T26H2.1.1	0	0.0669331
WBGene00012085	T27D12.1a.1	0.250792	0.0264735
WBGene00012085	T27D12.1b.1	-0.250792	0.0264735
WBGene00012098	T27E9.8	0	0.0674326
WBGene00012099	T27E9.9a.1	0.463422	0.0874126
WBGene00012099	T27E9.9a.2	-0.272967	0.0874126
WBGene00012099	T27E9.9b.1	-0.190455	0.0874126
WBGene00012114	T28B8.3a.1	0.255051	0.0524476
WBGene00012114	T28B8.3b.1	-0.255051	0.0524476
WBGene00012116	T28B8.5.1	0	0.0554446
WBGene00012132	T28F3.6.1	0	0.0689311
WBGene00012135	T28F3.9.1	0	0.0764236
WBGene00012136	T28F4.1.1	-0.342055	0.012987
WBGene00012136	T28F4.1.2	0.342055	0.012987
WBGene00012137	T28F4.2.1	0	0.0804196
WBGene00012140	T28F4.5.1	-0.0290655	0.0674326
WBGene00012140	T28F4.5.2	0.0290655	0.0674326
WBGene00012155	VW02B12L.2.1	-0.561669	0.043956
WBGene00012155	VW02B12L.2.2	0.561669	0.043956
WBGene00012159	VY10G11R.1.1	0	0.0709291
WBGene00012162	VZC374L.1a.1	0.501481	0.046953
WBGene00012162	VZC374L.1b.1	-0.501481	0.046953
WBGene00012170	W01B6.3.1	0	0.0684316
WBGene00012174	W01B6.8.1	0	0.0954046
WBGene00012176	W01C9.2.1	0	0.0499501
WBGene00012189	W02A2.4	0	0.0879121
WBGene00012190	W02A2.5.1	0	0.0554446
WBGene00012199	W02B8.3.1	0	0.0729271
WBGene00012219	W03C9.1.1	0	0.0744256
WBGene00012227	W03H9.1.1	0	0.043956
WBGene00012228	W03H9.2a	0.104818	0.0954046
WBGene00012228	W03H9.2b.1	-0.230645	0.0824176
WBGene00012228	W03H9.2b.2	0.125826	0.0954046
WBGene00012230	W03H9.4a.1	-0.0660999	0.0519481
WBGene00012230	W03H9.4b.1	-0.0583741	0.0519481
WBGene00012230	W03H9.4c.1	0.124474	0.047952
WBGene00012238	W04A8.3.1	0	0.0944056
WBGene00012241	W04A8.6a.1	-0.10874	0.0294705
WBGene00012241	W04A8.6b.1	0.10874	0.0294705
WBGene00012242	W04D2.2a.1	0.333333	0.0789211
WBGene00012242	W04D2.2b	0	0.0789211
WBGene00012242	W04D2.2c.1	-0.333333	0.0789211
WBGene00012245	W04D2.6a.1	-0.113485	0.0569431
WBGene00012245	W04D2.6b.1	0.0542772	0.0569431
WBGene00012245	W04D2.6c.1	0.059208	0.0569431
WBGene00012255	W04G3.1a.1	0.333333	0.0584416
WBGene00012255	W04G3.1b.1	-0.333333	0.0584416
WBGene00012256	W04G3.2.1	0	0.0664336
WBGene00012261	W04G3.8.1	0	0.0989011
WBGene00012275	W05B5.2.1	0	0.0484515
WBGene00012278	W05B10.3.1	0	0.0659341
WBGene00012281	W05E10.2.1	0	0.0669331
WBGene00012282	W05E10.5a.1	0.243512	0.0704296
WBGene00012282	W05E10.5b.1	-0.243512	0.0704296
WBGene00012282	W05E10.5c.1	0	0.0704296
WBGene00012295	W06B3.1.1	-0.242527	0.0404595
WBGene00012295	W06B3.1.2	0.242527	0.0404595
WBGene00012297	W06D4.3.1	0	0.0924076
WBGene00012308	W06G6.1.1	0	0.0684316
WBGene00012323	W07A12.6.1	0	0.0899101
WBGene00012330	W07G1.3.1	0.0781241	0.0639361
WBGene00012330	W07G1.3.2	-0.0781241	0.0639361
WBGene00012332	W07G1.5a.1	-0.716096	0.0134865
WBGene00012332	W07G1.5b.1	0.716096	0.0134865
WBGene00012340	W08D2.3a.1	0	0.0494505
WBGene00012340	W08D2.3c.1	0	0.0494505
WBGene00012359	W09D10.1.1	-0.165947	0.010989
WBGene00012359	W09D10.1.2	0.165947	0.010989
WBGene00012372	W09H1.1a.1	0.0170048	0.0659341
WBGene00012372	W09H1.1b.1	0	0.0659341
WBGene00012372	W09H1.1c.1	0.437898	0.0659341
WBGene00012372	W09H1.1d.1	-0.454903	0.0659341
WBGene00012388	Y6B3B.3	0	0.0504496
WBGene00012390	Y6B3B.5a.1	0.180352	0.0794206
WBGene00012390	Y6B3B.5b.1	-0.180352	0.0794206
WBGene00012391	Y6B3B.7a.1	0.164299	0.0694306
WBGene00012391	Y6B3B.7a.2	0	0.0694306
WBGene00012391	Y6B3B.7b.1	0.169034	0.0694306
WBGene00012391	Y6B3B.7b.2	-0.333333	0.0694306
WBGene00012401	Y6E2A.8.1	0	0.0994006
WBGene00012402	Y6E2A.9a.1	-0.333333	0.0724276
WBGene00012402	Y6E2A.9b.1	0.333333	0.0724276
WBGene00012426	Y11D7A.1	0	0.0684316
WBGene00012441	Y15E3A.2.1	0	0.0859141
WBGene00012444	Y15E3A.5.1	0.126967	0.0939061
WBGene00012444	Y15E3A.5.2	-0.126967	0.0939061
WBGene00012470	Y17G7B.19	0	0.0729271
WBGene00012480	Y18D10A.10.1	0	0.0994006
WBGene00012482	Y18D10A.12.1	0	0.0719281
WBGene00012491	Y20C6A.1a.1	-0.292442	0.0799201
WBGene00012491	Y20C6A.1b.1	0.292442	0.0799201
WBGene00012494	Y22F5A.1a.1	0.204694	0.0759241
WBGene00012494	Y22F5A.1b.1	-0.204694	0.0759241
WBGene00012501	Y26D4A.3.1	0	0.0934066
WBGene00012518	Y32B12A.3.1	0	0.0924076
WBGene00012524	Y32B12B.4a.1	-0.053236	0.0959041
WBGene00012524	Y32B12B.4b.1	0.144894	0.0824176
WBGene00012524	Y32B12B.4c.1	-0.0916584	0.0899101
WBGene00012525	Y32B12C.1.1	0	0.0919081
WBGene00012526	Y32B12C.3	0	0.0684316
WBGene00012573	Y37H2C.1	0	0.043956
WBGene00012597	Y38E10A.19.1	0	0.0904096
WBGene00012615	Y38H6C.1a.1	0.0138588	0.0734266
WBGene00012615	Y38H6C.1b.1	-0.0138588	0.0734266
WBGene00012618	Y38H6C.5	0	0.0679321
WBGene00012626	Y38H6C.14.1	0	0.0834166
WBGene00012629	Y38H6C.17.1	0	0.0934066
WBGene00012632	Y38H6C.20.1	0	0.0689311
WBGene00012633	Y38H6C.21a	0	0.0819181
WBGene00012633	Y38H6C.21b.1	0	0.0819181
WBGene00012635	Y38H8A.1.1	0	0.0534466
WBGene00012639	Y38H8A.5.1	0	0.0979021
WBGene00012648	Y39A1A.9.1	0	0.0914086
WBGene00012665	Y39B6A.2a.1	-0.0653919	0.0484515
WBGene00012665	Y39B6A.2b.1	0.0653919	0.0484515
WBGene00012679	Y39B6A.18	0	0.0679321
WBGene00012688	Y39B6A.29a.1	-0.248886	0.0699301
WBGene00012688	Y39B6A.29b.1	0.248886	0.0699301
WBGene00012690	Y39B6A.31	0	0.0924076
WBGene00012697	Y39B6A.39a.1	-0.0606036	0.0739261
WBGene00012697	Y39B6A.39b.1	0.0606036	0.0739261
WBGene00012703	Y39B6A.47a.1	0.2194	0.0714286
WBGene00012703	Y39B6A.47b.1	-0.2194	0.0714286
WBGene00012713	Y39E4A.3a.2	0.0724437	0.0809191
WBGene00012713	Y39E4A.3b.1	-0.0734703	0.0809191
WBGene00012722	Y39G8B.1a.1	-0.0947775	0.0801698
WBGene00012722	Y39G8B.1a.2	0.101085	0.0801698
WBGene00012726	Y39G8B.5.1	0	0.0649351
WBGene00012769	Y41E3.11a.2	-0.105821	0.0959041
WBGene00012769	Y41E3.11d.1	0.162142	0.0959041
WBGene00012779	Y42A5A.4a.1	-0.333333	0.048951
WBGene00012779	Y42A5A.4b.1	0.666667	0.048951
WBGene00012779	Y42A5A.4c.1	-0.333333	0.048951
WBGene00012806	Y43F4B.9a.2	-0.103744	0.0704296
WBGene00012806	Y43F4B.9b.1	0.103744	0.0704296
WBGene00012810	Y43F8A.3a.1	-0.262564	0.0529471
WBGene00012810	Y43F8A.3b.1	0.262564	0.0529471
WBGene00012813	Y43F8B.2c.1	0.0791829	0.0999001
WBGene00012813	Y43F8B.2e.1	0.100007	0.0944056
WBGene00012813	Y43F8B.2f.1	-0.240455	0.020979
WBGene00012814	Y43F8B.3a.1	-0.333333	0.043956
WBGene00012814	Y43F8B.3b.1	0	0.043956
WBGene00012814	Y43F8B.3c.1	0	0.043956
WBGene00012814	Y43F8B.3d.1	-0.0355475	0.043956
WBGene00012814	Y43F8B.3e.1	0	0.043956
WBGene00012814	Y43F8B.3f.1	0.112797	0.043956
WBGene00012814	Y43F8B.3g.1	0	0.043956
WBGene00012814	Y43F8B.3h.1	0.256084	0.043956
WBGene00012823	Y43F8B.13.1	0	0.0999001
WBGene00012824	Y43F8B.14.1	0	0.0899101
WBGene00012839	Y43F8C.18	0	0.0919081
WBGene00012854	Y44A6D.3a.1	0.232159	0.0404595
WBGene00012854	Y44A6D.3b.1	-0.232159	0.0404595
WBGene00012856	Y44A6D.6.1	0	0.0679321
WBGene00012870	Y45F10B.2	0	0.0749251
WBGene00012883	Y45F10D.2.1	0	0.0829171
WBGene00012890	Y45F10D.11a.1	-0.135879	0.0544456
WBGene00012890	Y45F10D.11b.1	0.135879	0.0544456
WBGene00012905	Y46G5A.14.1	-0.526212	0.024975
WBGene00012905	Y46G5A.14.2	0.526212	0.024975
WBGene00012907	Y46G5A.17.1	-0.0741658	0.0384615
WBGene00012907	Y46G5A.17.2	0.0741658	0.0384615
WBGene00012908	Y46G5A.18a.1	0.0958723	0.035964
WBGene00012908	Y46G5A.18b.1	-0.0958723	0.035964
WBGene00012914	Y46G5A.24.1	0	0.0684316
WBGene00012915	Y46G5A.26a.1	0	0.0949051
WBGene00012915	Y46G5A.26b.1	0	0.0949051
WBGene00012919	Y46G5A.34.1	0.218651	0.0794206
WBGene00012919	Y46G5A.34.3	-0.172849	0.0794206
WBGene00012923	Y47D3A.2.1	0.325446	0.0524476
WBGene00012923	Y47D3A.2.2	-0.325446	0.0524476
WBGene00012939	Y47D3B.1.1	0	0.0704296
WBGene00012962	Y48A6B.1.1	0	0.0654346
WBGene00012969	Y48A6B.8.1	0	0.0889111
WBGene00013031	Y49E10.7	0	0.0754246
WBGene00013032	Y49E10.9	0	0.0644356
WBGene00013033	Y49E10.10.1	0.634257	0.015984
WBGene00013033	Y49E10.10.2	-0.634257	0.015984
WBGene00013036	Y49E10.17b	0.399997	0.0831668
WBGene00013036	Y49E10.17c	-0.348728	0.0831668
WBGene00013043	Y49E10.24.1	0	0.0554446
WBGene00013047	Y50E8A.2.1	0	0.0914086
WBGene00013056	Y50E8A.14	0	0.043956
WBGene00013070	Y51A2B.6.1	0	0.0864136
WBGene00013076	Y51A2D.8.1	0	0.0554446
WBGene00013077	Y51A2D.9a.1	0.0452149	0.0554446
[truncated: 1,902 more rows]
