# Supplementary material
Source: Research Square preprint supplement (doi:10.21203/rs.3.rs-7966420/v1)
Supplement: Supplementary file 8 [file f99b86c5293fa86e17200173.xlsx]

## Sheet: N2.30mHS.N2.Ctrl
gene

## Sheet: N2.5mHS.N2.Ctrl
gene

## Sheet: N2.REC.N2.Ctrl
gene

## Sheet: PRDE1.30mHS.PRDE1.Ctrl
gene

## Sheet: PRDE1.5mHS.PRDE1.Ctrl
gene

## Sheet: PRDE1.REC.PRDE1.Ctrl
gene

## Sheet: sy441.30mHS.sy441.Ctrl
gene

## Sheet: sy441.5mHS.sy441.Ctrl
gene

## Sheet: sy441.REC.sy441.Ctrl
gene
