# Supplementary material
Source: Research Square preprint supplement (doi:10.21203/rs.3.rs-7966420/v1)
Supplement: Supplementary file 9 [file fb3c0e012e6f406b4e818765.xlsx]

## Sheet: N2
Sample	Replicate	CHROM	POS	REF	ALT	GENE	IMPACT	Effect_Type	Functional_Class	LoF	NMD	AD_Ref	AD_Alt	Read_Depth	gt_AD	AC	Variant_Type	Variant_ratio
N2	1	I	77069	G	GA	csk-1	HIGH	frameshift_variant	OTHER	TRUE	FALSE	21	5	26	21,5	1	Insertion	0.192308
N2	1	I	83366	G	GA	Y48G1C.10	HIGH	frameshift_variant	OTHER	TRUE	FALSE	8	3	11	8,3	1	Insertion	0.272727
N2	1	I	88449	C	CA	Y48G1C.10	HIGH	frameshift_variant	OTHER	TRUE	FALSE	8	3	11	8,3	1	Insertion	0.272727
N2	1	I	97827	C	CT	Y48G1C.8	HIGH	frameshift_variant	OTHER	TRUE	FALSE	63	10	73	63,10	1	Insertion	0.136986
N2	1	I	182218	G	GT	F56C11.3	HIGH	frameshift_variant	OTHER	TRUE	FALSE	17	6	23	17,6	1	Insertion	0.26087
N2	1	I	183392	T	TA	atm-1	HIGH	frameshift_variant	OTHER	FALSE	FALSE	9	2	11	9,2	1	Insertion	0.181818
N2	1	I	205097	G	A	atm-1	MODERATE	missense_variant	MISSENSE	FALSE	FALSE	8	2	10	8,2	1	SNP	0.2
N2	1	I	205099	G	A	atm-1	MODERATE	missense_variant	MISSENSE	FALSE	FALSE	8	2	10	8,2	1	SNP	0.2
N2	1	I	205440	G	A	atm-1	LOW	synonymous_variant	SILENT	FALSE	FALSE	16	4	20	16,4	1	SNP	0.2
N2	1	I	324450	G	GA	nol-14	HIGH	frameshift_variant	OTHER	TRUE	FALSE	26	5	31	26,5	1	Insertion	0.16129
N2	1	I	695259	G	A	Y18H1A.2	MODERATE	missense_variant	MISSENSE	FALSE	FALSE	31	4	35	31,4	1	SNP	0.114286
N2	1	I	696861	C	CT	Y18H1A.2	HIGH	frameshift_variant	OTHER	TRUE	FALSE	45	6	51	45,6	1	Insertion	0.117647
N2	1	I	903414	G	GA	gpa-16	HIGH	frameshift_variant	OTHER	TRUE	FALSE	25	4	29	25,4	1	Insertion	0.137931
N2	1	I	904697	C	CA	gpa-16	HIGH	frameshift_variant	OTHER	TRUE	FALSE	61	10	71	61,10	1	Insertion	0.140845
N2	1	I	1040209	G	GA	Y34D9A.3	HIGH	frameshift_variant	OTHER	TRUE	FALSE	9	2	11	9,2	1	Insertion	0.181818
N2	1	I	1221201	G	T	herc-1	MODERATE	missense_variant	MISSENSE	FALSE	FALSE	14	2	16	14,2	1	SNP	0.125
N2	1	I	1221222	A	T	herc-1	MODERATE	missense_variant	MISSENSE	FALSE	FALSE	11	2	13	11,2	1	SNP	0.153846
N2	1	I	1340682	C	G	smo-1	LOW	5_prime_UTR_premature_start_codon_gain_variant	OTHER	FALSE	FALSE	5	15	20	5,15	1	SNP	0.75
N2	1	I	1414139	A	AT	Y92H12BR.2	HIGH	frameshift_variant	OTHER	TRUE	FALSE	8	3	11	8,3	1	Insertion	0.272727
N2	1	I	1420764	C	CA	Y92H12BR.3	HIGH	frameshift_variant	OTHER	TRUE	FALSE	21	7	28	21,7	1	Insertion	0.25
N2	1	I	1440967	C	CA	mrpl-15	HIGH	frameshift_variant	OTHER	TRUE	FALSE	61	13	74	61,13	1	Insertion	0.175676
N2	1	I	1511329	C	CT	Y92H12A.5	HIGH	frameshift_variant	OTHER	TRUE	FALSE	16	3	19	16,3	1	Insertion	0.157895
N2	1	I	1517936	G	GA	Y92H12A.4	HIGH	frameshift_variant	OTHER	TRUE	FALSE	11	4	15	11,4	1	Insertion	0.266667
N2	1	I	1606403	C	CA	Y73E7A.2	HIGH	frameshift_variant	OTHER	TRUE	FALSE	15	6	21	15,6	1	Insertion	0.285714
N2	1	I	1835788	G	GT	C53H9.4	HIGH	frameshift_variant	OTHER	TRUE	FALSE	16	3	19	16,3	1	Insertion	0.157895
N2	1	I	2069578	G	C	rla-1	LOW	5_prime_UTR_premature_start_codon_gain_variant	OTHER	FALSE	FALSE	12	6	18	12,6	1	SNP	0.333333
N2	1	I	2163257	G	GA	afd-1	HIGH	frameshift_variant	OTHER	TRUE	FALSE	55	8	63	55,8	1	Insertion	0.126984
N2	1	I	2204953	T	C	afd-1	MODERATE	missense_variant	MISSENSE	FALSE	FALSE	9	2	11	9,2	1	SNP	0.181818
N2	1	I	2204954	C	A	afd-1	LOW	synonymous_variant	SILENT	FALSE	FALSE	9	2	11	9,2	1	SNP	0.181818
N2	1	I	2281694	G	GT	cdk-7	HIGH	frameshift_variant	OTHER	TRUE	FALSE	21	6	27	21,6	1	Insertion	0.222222
N2	1	I	2308483	C	CA	Y39G10AR.9	HIGH	frameshift_variant	OTHER	TRUE	FALSE	16	3	19	16,3	1	Insertion	0.157895
N2	1	I	2421736	G	C	did-2	LOW	5_prime_UTR_premature_start_codon_gain_variant	OTHER	FALSE	FALSE	6	4	10	6,4	1	SNP	0.4
N2	1	I	2432849	G	GT	tipn-1	HIGH	frameshift_variant	OTHER	TRUE	FALSE	67	13	80	67,13	1	Insertion	0.1625
N2	1	I	2492735	G	GA	Y23H5B.6	HIGH	frameshift_variant	OTHER	TRUE	FALSE	12	4	16	12,4	1	Insertion	0.25
N2	1	I	2496838	C	CA	Y23H5B.6	HIGH	frameshift_variant	OTHER	TRUE	FALSE	83	13	96	83,13	1	Insertion	0.135417
N2	1	I	2498378	C	CA	Y23H5B.5	HIGH	frameshift_variant	OTHER	TRUE	FALSE	27	5	32	27,5	1	Insertion	0.15625
N2	1	I	2768670	C	CT	sop-3	HIGH	frameshift_variant	OTHER	TRUE	FALSE	39	6	45	39,6	1	Insertion	0.133333
N2	1	I	2813690	C	CA	itx-1	HIGH	frameshift_variant	OTHER	TRUE	FALSE	8	4	12	8,4	1	Insertion	0.333333
N2	1	I	2876311	G	C	rpl-1	LOW	5_prime_UTR_premature_start_codon_gain_variant	OTHER	FALSE	FALSE	2	52	54	2,52	2	SNP	0.962963
N2	1	I	2880239	ATG	A	Y71F9AL.8	HIGH	frameshift_variant	OTHER	TRUE	FALSE	10	2	12	10,2	1	Deletion	0.166667
N2	1	I	3001120	G	A	dnj-28	MODERATE	missense_variant	MISSENSE	FALSE	FALSE	6	4	10	6,4	1	SNP	0.4
N2	1	I	3148119	C	CA	dscc-1	HIGH	frameshift_variant	OTHER	TRUE	FALSE	16	3	19	16,3	1	Insertion	0.157895
N2	1	I	3165087	A	T	Y54E10A.6	LOW	synonymous_variant	SILENT	FALSE	FALSE	14	2	16	14,2	1	SNP	0.125
N2	1	I	3165088	A	T	Y54E10A.6	MODERATE	missense_variant	MISSENSE	FALSE	FALSE	14	2	16	14,2	1	SNP	0.125
N2	1	I	3184353	A	G	Y54E10A.11	MODERATE	missense_variant	MISSENSE	FALSE	FALSE	18	8	26	18,8	1	SNP	0.307692
N2	1	I	3238232	G	GA	cogc-1	HIGH	frameshift_variant	OTHER	TRUE	FALSE	22	4	26	22,4	1	Insertion	0.153846
N2	1	I	3240117	C	CA	cogc-1	HIGH	frameshift_variant	OTHER	TRUE	FALSE	9	3	12	9,3	1	Insertion	0.25
N2	1	I	3445489	C	CA	tag-63	HIGH	frameshift_variant	OTHER	TRUE	FALSE	10	3	13	10,3	1	Insertion	0.230769
N2	1	I	3519611	C	CA	pcaf-1	HIGH	frameshift_variant	OTHER	TRUE	FALSE	21	9	30	21,9	1	Insertion	0.3
N2	1	I	3580387	A	AT	lpd-3	HIGH	frameshift_variant	OTHER	TRUE	FALSE	20	4	24	20,4	1	Insertion	0.166667
N2	1	I	3611541	GC	G	inx-22	HIGH	frameshift_variant	OTHER	TRUE	FALSE	15	2	17	15,2	1	Deletion	0.117647
N2	1	I	3684089	G	C	rab-8	LOW	5_prime_UTR_premature_start_codon_gain_variant	OTHER	FALSE	FALSE	8	2	10	8,2	1	SNP	0.2
N2	1	I	3924046	G	GT	T20F5.6	HIGH	frameshift_variant	OTHER	TRUE	FALSE	35	6	41	35,6	1	Insertion	0.146341
N2	1	I	3985385	C	CA	aars-2	HIGH	frameshift_variant	OTHER	TRUE	FALSE	113	15	128	113,15	1	Insertion	0.117188
N2	1	I	4133468	T	TA	E01A2.2	HIGH	frameshift_variant	OTHER	TRUE	FALSE	230	42	272	230,42	1	Insertion	0.154412
N2	1	I	4175843	G	GA	rpn-8	HIGH	frameshift_variant	OTHER	TRUE	FALSE	45	6	51	45,6	1	Insertion	0.117647
N2	1	I	4191314	G	GA	cas-2	HIGH	frameshift_variant	OTHER	TRUE	FALSE	15	3	18	15,3	1	Insertion	0.166667
N2	1	I	4215304	A	AT	C18E3.9	HIGH	frameshift_variant	OTHER	TRUE	FALSE	12	3	15	12,3	1	Insertion	0.2
N2	1	I	4258959	T	TA	met-1	HIGH	frameshift_variant	OTHER	TRUE	FALSE	119	16	135	119,16	1	Insertion	0.118519
N2	1	I	4261175	C	CA	met-1	HIGH	frameshift_variant	OTHER	TRUE	FALSE	42	9	51	42,9	1	Insertion	0.176471
N2	1	I	4268670	C	CT	cdc-6	HIGH	frameshift_variant	OTHER	TRUE	FALSE	31	5	36	31,5	1	Insertion	0.138889
N2	1	I	4327502	AC	A	anc-1	HIGH	frameshift_variant	OTHER	TRUE	FALSE	8	2	10	8,2	1	Deletion	0.2
N2	1	I	4373660	C	G	cec-10	LOW	5_prime_UTR_premature_start_codon_gain_variant	OTHER	FALSE	FALSE	14	4	18	14,4	1	SNP	0.222222
N2	1	I	4383245	G	GA	ZK973.1	HIGH	frameshift_variant	OTHER	TRUE	FALSE	76	16	92	76,16	1	Insertion	0.173913
N2	1	I	4442659	G	GT	C41D11.3	HIGH	frameshift_variant	OTHER	TRUE	FALSE	51	7	58	51,7	1	Insertion	0.12069
N2	1	I	4442707	G	GT	C41D11.3	HIGH	frameshift_variant	OTHER	TRUE	FALSE	57	9	66	57,9	1	Insertion	0.136364
N2	1	I	4446932	C	CT	cps-6	HIGH	frameshift_variant	OTHER	TRUE	FALSE	9	2	11	9,2	1	Insertion	0.181818
N2	1	I	4504513	G	GA	gcy-28	HIGH	frameshift_variant	OTHER	TRUE	FALSE	18	3	21	18,3	1	Insertion	0.142857
N2	1	I	4530758	C	CT	bet-1	HIGH	frameshift_variant	OTHER	TRUE	FALSE	35	12	47	35,12	1	Insertion	0.255319
N2	1	I	4656068	T	C	ain-2	MODERATE	missense_variant	MISSENSE	FALSE	FALSE	65	15	80	65,15	1	SNP	0.1875
N2	1	I	4742617	C	CA	let-502	HIGH	frameshift_variant	OTHER	TRUE	FALSE	20	6	26	20,6	1	Insertion	0.230769
N2	1	I	4776136	C	CT	M04F3.5	HIGH	frameshift_variant	OTHER	TRUE	FALSE	9	2	11	9,2	1	Insertion	0.181818
N2	1	I	4789225	C	G	rpl-41.1	LOW	5_prime_UTR_premature_start_codon_gain_variant	OTHER	FALSE	FALSE	2	11	13	2,11	1	SNP	0.846154
N2	1	I	4789373	C	T	rpl-41.1	LOW	synonymous_variant	SILENT	FALSE	FALSE	22	3	25	22,3	1	SNP	0.12
N2	1	I	4831348	T	TA	F57C9.4	HIGH	frameshift_variant	OTHER	TRUE	FALSE	90	11	101	90,11	1	Insertion	0.108911
N2	1	I	4935378	C	CA	dip-2	HIGH	frameshift_variant	OTHER	TRUE	FALSE	40	10	50	40,10	1	Insertion	0.2
N2	1	I	4947244	G	GT	dip-2	HIGH	frameshift_variant	OTHER	TRUE	FALSE	8	2	10	8,2	1	Insertion	0.2
N2	1	I	4955152	A	AT	him-1	HIGH	frameshift_variant	OTHER	TRUE	FALSE	113	14	127	113,14	1	Insertion	0.110236
N2	1	I	5002302	G	GA	mes-3	HIGH	frameshift_variant	OTHER	FALSE	FALSE	9	2	11	9,2	1	Insertion	0.181818
N2	1	I	5106911	G	GA	use-1	HIGH	frameshift_variant	OTHER	TRUE	FALSE	40	9	49	40,9	1	Insertion	0.183673
N2	1	I	5113558	C	CT	Y110A7A.15	HIGH	frameshift_variant	OTHER	TRUE	FALSE	47	8	55	47,8	1	Insertion	0.145455
N2	1	I	5116313	G	GT	elpc-1	HIGH	frameshift_variant	OTHER	TRUE	FALSE	59	8	67	59,8	1	Insertion	0.119403
N2	1	I	5172163	A	AT	spd-5	HIGH	frameshift_variant	OTHER	TRUE	FALSE	28	5	33	28,5	1	Insertion	0.151515
N2	1	I	5244796	G	GA	mrpl-47	HIGH	frameshift_variant	OTHER	TRUE	FALSE	43	8	51	43,8	1	Insertion	0.156863
N2	1	I	5252393	TTG	T	let-363	HIGH	frameshift_variant	OTHER	TRUE	FALSE	16	2	18	16,2	1	Deletion	0.111111
N2	1	I	5271879	T	C	B0261.8	LOW	synonymous_variant	SILENT	FALSE	FALSE	12	2	14	12,2	1	SNP	0.142857
N2	1	I	5271900	T	C	B0261.8	LOW	synonymous_variant	SILENT	FALSE	FALSE	11	2	13	11,2	1	SNP	0.153846
N2	1	I	5271901	T	C	B0261.8	MODERATE	missense_variant	MISSENSE	FALSE	FALSE	11	2	13	11,2	1	SNP	0.153846
N2	1	I	5271902	T	C	B0261.8	MODERATE	missense_variant	MISSENSE	FALSE	FALSE	11	2	13	11,2	1	SNP	0.153846
N2	1	I	5271906	T	C	B0261.8	LOW	synonymous_variant	SILENT	FALSE	FALSE	11	2	13	11,2	1	SNP	0.153846
N2	1	I	5318038	C	CT	F48C1.5	HIGH	frameshift_variant	OTHER	TRUE	FALSE	12	4	16	12,4	1	Insertion	0.25
N2	1	I	5348553	C	CA	F55A12.5	HIGH	frameshift_variant	OTHER	TRUE	FALSE	51	7	58	51,7	1	Insertion	0.12069
N2	1	I	5348693	G	GA	F55A12.5	HIGH	frameshift_variant	OTHER	TRUE	FALSE	172	23	195	172,23	1	Insertion	0.117949
N2	1	I	5473444	A	G	let-355	LOW	synonymous_variant	SILENT	FALSE	FALSE	15	7	22	15,7	1	SNP	0.318182
N2	1	I	5479161	C	CT	let-355	HIGH	frameshift_variant	OTHER	TRUE	FALSE	29	7	36	29,7	1	Insertion	0.194444
N2	1	I	5565162	C	CA	fubl-4	HIGH	frameshift_variant	OTHER	TRUE	FALSE	16	4	20	16,4	1	Insertion	0.2
N2	1	I	5572952	G	C	cey-3	LOW	5_prime_UTR_premature_start_codon_gain_variant	OTHER	FALSE	FALSE	28	20	48	28,20	1	SNP	0.416667
N2	1	I	5584571	G	A	tns-1	LOW	synonymous_variant	SILENT	FALSE	FALSE	10	2	12	10,2	1	SNP	0.166667
N2	1	I	5647500	C	CT	F55F8.2	HIGH	frameshift_variant	OTHER	TRUE	FALSE	10	5	15	10,5	1	Insertion	0.333333
N2	1	I	5649319	A	AT	F55F8.2	HIGH	frameshift_variant	OTHER	TRUE	FALSE	78	13	91	78,13	1	Insertion	0.142857
N2	1	I	5649508	C	CT	F55F8.2	HIGH	frameshift_variant	OTHER	TRUE	FALSE	41	7	48	41,7	1	Insertion	0.145833
N2	1	I	5651033	A	AT	F55F8.3	HIGH	frameshift_variant	OTHER	TRUE	FALSE	53	9	62	53,9	1	Insertion	0.145161
N2	1	I	5693215	G	GA	npp-7	HIGH	frameshift_variant	OTHER	TRUE	FALSE	27	6	33	27,6	1	Insertion	0.181818
N2	1	I	5775043	T	TA	hil-5	HIGH	frameshift_variant	OTHER	TRUE	FALSE	125	16	141	125,16	1	Insertion	0.113475
N2	1	I	5797474	G	GT	mtk-1	HIGH	frameshift_variant	OTHER	TRUE	FALSE	17	5	22	17,5	1	Insertion	0.227273
N2	1	I	5801095	C	CT	mtk-1	HIGH	frameshift_variant	OTHER	FALSE	FALSE	39	8	47	39,8	1	Insertion	0.170213
N2	1	I	5816386	C	CT	hmg-3	HIGH	frameshift_variant	OTHER	TRUE	FALSE	251	31	282	251,31	1	Insertion	0.109929
N2	1	I	5833072	G	GA	obr-4	HIGH	frameshift_variant	OTHER	TRUE	FALSE	7	3	10	7,3	1	Insertion	0.3
N2	1	I	5857780	G	GT	hpo-3	HIGH	frameshift_variant	OTHER	TRUE	FALSE	67	10	77	67,10	1	Insertion	0.12987
N2	1	I	5908390	G	GC	hpo-27	HIGH	frameshift_variant	OTHER	TRUE	FALSE	15	2	17	15,2	1	Insertion	0.117647
N2	1	I	5908391	A	T	hpo-27	MODERATE	missense_variant	MISSENSE	FALSE	FALSE	15	2	17	15,2	1	SNP	0.117647
N2	1	I	6020663	T	TA	inst-1	HIGH	frameshift_variant	OTHER	TRUE	FALSE	106	14	120	106,14	1	Insertion	0.116667
N2	1	I	6044085	GAA	G	C27A12.2	HIGH	frameshift_variant	OTHER	TRUE	FALSE	17	2	19	17,2	1	Deletion	0.105263
N2	1	I	6114279	C	CA	usp-5	HIGH	frameshift_variant	OTHER	FALSE	FALSE	16	5	21	16,5	1	Insertion	0.238095
N2	1	I	6240375	T	C	C48E7.6	LOW	synonymous_variant	SILENT	FALSE	FALSE	9	2	11	9,2	1	SNP	0.181818
N2	1	I	6240376	T	C	C48E7.6	MODERATE	missense_variant	MISSENSE	FALSE	FALSE	9	2	11	9,2	1	SNP	0.181818
N2	1	I	6344754	G	C	bli-4	MODERATE	missense_variant	MISSENSE	FALSE	FALSE	8	2	10	8,2	1	SNP	0.2
N2	1	I	6384233	C	CA	gld-2	HIGH	frameshift_variant	OTHER	TRUE	FALSE	11	4	15	11,4	1	Insertion	0.266667
N2	1	I	6424004	T	C	ncbp-1	LOW	synonymous_variant	SILENT	FALSE	FALSE	25	6	31	25,6	1	SNP	0.193548
N2	1	I	6425231	C	T	ncbp-1	MODERATE	missense_variant	MISSENSE	FALSE	FALSE	11	2	13	11,2	1	SNP	0.153846
N2	1	I	6474387	C	CA	K06A5.1	HIGH	frameshift_variant	OTHER	TRUE	FALSE	65	9	74	65,9	1	Insertion	0.121622
N2	1	I	6557378	C	CA	tre-1	HIGH	frameshift_variant	OTHER	TRUE	FALSE	97	14	111	97,14	1	Insertion	0.126126
N2	1	I	6566290	G	GA	F57B10.4	HIGH	frameshift_variant	OTHER	FALSE	FALSE	13	5	18	13,5	1	Insertion	0.277778
N2	1	I	6566687	C	CA	F57B10.4	HIGH	frameshift_variant	OTHER	TRUE	FALSE	55	13	68	55,13	1	Insertion	0.191176
N2	1	I	6568500	C	CA	F57B10.4	HIGH	frameshift_variant	OTHER	TRUE	FALSE	10	3	13	10,3	1	Insertion	0.230769
N2	1	I	6583250	C	CA	let-607	HIGH	frameshift_variant	OTHER	TRUE	FALSE	31	6	37	31,6	1	Insertion	0.162162
N2	1	I	6663552	G	GA	nekl-2	HIGH	frameshift_variant	OTHER	TRUE	FALSE	9	3	12	9,3	1	Insertion	0.25
N2	1	I	6735890	TC	T	smg-5	HIGH	frameshift_variant	OTHER	TRUE	FALSE	8	2	10	8,2	1	Deletion	0.2
N2	1	I	6836466	C	G	ahcy-1	LOW	5_prime_UTR_premature_start_codon_gain_variant	OTHER	FALSE	FALSE	22	39	61	22,39	1	SNP	0.639344
N2	1	I	6850619	G	GA	rpb-5	HIGH	frameshift_variant	OTHER	TRUE	FALSE	45	13	58	45,13	1	Insertion	0.224138
N2	1	I	6904229	C	CT	smg-1	HIGH	frameshift_variant	OTHER	TRUE	FALSE	22	4	26	22,4	1	Insertion	0.153846
N2	1	I	6936793	T	TA	cerk-1	HIGH	frameshift_variant	OTHER	FALSE	FALSE	12	3	15	12,3	1	Insertion	0.2
N2	1	I	6945092	G	GT	T10B11.6	HIGH	frameshift_variant	OTHER	TRUE	FALSE	10	3	13	10,3	1	Insertion	0.230769
N2	1	I	7008395	C	CA	ctg-1	HIGH	frameshift_variant	OTHER	TRUE	FALSE	27	4	31	27,4	1	Insertion	0.129032
N2	1	I	7013908	C	CT	chd-1	HIGH	frameshift_variant	OTHER	TRUE	FALSE	70	19	89	70,19	1	Insertion	0.213483
N2	1	I	7014595	C	CT	chd-1	HIGH	frameshift_variant	OTHER	TRUE	FALSE	51	11	62	51,11	1	Insertion	0.177419
N2	1	I	7154974	A	AT	crml-1	HIGH	frameshift_variant	OTHER	TRUE	FALSE	19	5	24	19,5	1	Insertion	0.208333
N2	1	I	7188606	T	C	M05B5.4	MODERATE	missense_variant	MISSENSE	FALSE	FALSE	8	2	10	8,2	1	SNP	0.2
N2	1	I	7188607	T	G	M05B5.4	MODERATE	missense_variant	MISSENSE	FALSE	FALSE	8	2	10	8,2	1	SNP	0.2
N2	1	I	7225269	G	GA	swsn-9	HIGH	frameshift_variant	OTHER	TRUE	FALSE	96	12	108	96,12	1	Insertion	0.111111
N2	1	I	7233937	G	GA	R06C7.2	HIGH	frameshift_variant	OTHER	TRUE	FALSE	21	5	26	21,5	1	Insertion	0.192308
N2	1	I	7235792	T	TA	wago-1	HIGH	frameshift_variant	OTHER	TRUE	FALSE	84	12	96	84,12	1	Insertion	0.125
N2	1	I	7248001	C	CT	adsl-1	HIGH	frameshift_variant	OTHER	TRUE	FALSE	36	8	44	36,8	1	Insertion	0.181818
N2	1	I	7302900	C	CT	ttx-7	HIGH	frameshift_variant	OTHER	TRUE	FALSE	15	4	19	15,4	1	Insertion	0.210526
N2	1	I	7349659	G	GA	kbrl-1	HIGH	frameshift_variant	OTHER	TRUE	FALSE	59	14	73	59,14	1	Insertion	0.191781
N2	1	I	7460161	C	CA	lars-2	HIGH	frameshift_variant	OTHER	TRUE	FALSE	14	3	17	14,3	1	Insertion	0.176471
N2	1	I	7473995	CT	C	T28F4.1	HIGH	frameshift_variant	OTHER	TRUE	FALSE	9	2	11	9,2	1	Deletion	0.181818
N2	1	I	7497095	G	GA	pbrm-1	HIGH	frameshift_variant	OTHER	TRUE	FALSE	39	8	47	39,8	1	Insertion	0.170213
N2	1	I	7541277	C	CT	dcp-66	HIGH	frameshift_variant	OTHER	TRUE	FALSE	31	11	42	31,11	1	Insertion	0.261905
N2	1	I	7556607	G	GA	chs-1	HIGH	frameshift_variant	OTHER	TRUE	FALSE	185	39	224	185,39	1	Insertion	0.174107
N2	1	I	7621458	T	A	lrp-1	MODERATE	missense_variant	MISSENSE	FALSE	FALSE	9	2	11	9,2	1	SNP	0.181818
N2	1	I	7621466	T	A	lrp-1	MODERATE	missense_variant	MISSENSE	FALSE	FALSE	9	2	11	9,2	1	SNP	0.181818
N2	1	I	7630404	T	C	lrp-1	LOW	synonymous_variant	SILENT	FALSE	FALSE	7	5	12	7,5	1	SNP	0.416667
N2	1	I	7646461	G	GT	rrf-1	HIGH	frameshift_variant	OTHER	TRUE	FALSE	36	8	44	36,8	1	Insertion	0.181818
N2	1	I	7694378	C	CA	T23G11.4	HIGH	frameshift_variant	OTHER	TRUE	FALSE	7	3	10	7,3	1	Insertion	0.3
N2	1	I	7703279	T	TA	F27D4.1	HIGH	frameshift_variant	OTHER	TRUE	FALSE	49	12	61	49,12	1	Insertion	0.196721
N2	1	I	7775336	C	CA	adr-1	HIGH	frameshift_variant	OTHER	TRUE	FALSE	37	5	42	37,5	1	Insertion	0.119048
N2	1	I	7776168	G	GA	adr-1	HIGH	frameshift_variant	OTHER	TRUE	FALSE	40	7	47	40,7	1	Insertion	0.148936
N2	1	I	7815685	T	TA	D2005.4	HIGH	frameshift_variant	OTHER	TRUE	FALSE	8	2	10	8,2	1	Insertion	0.2
N2	1	I	7836275	G	GA	gras-1	HIGH	frameshift_variant	OTHER	TRUE	FALSE	52	9	61	52,9	1	Insertion	0.147541
N2	1	I	7846461	T	TA	F30F8.10	HIGH	frameshift_variant	OTHER	TRUE	FALSE	11	3	14	11,3	1	Insertion	0.214286
N2	1	I	7858134	C	T	nud-2	LOW	synonymous_variant	SILENT	FALSE	FALSE	43	9	52	43,9	1	SNP	0.173077
N2	1	I	7859241	C	CT	nud-2	HIGH	frameshift_variant	OTHER	TRUE	FALSE	147	23	170	147,23	1	Insertion	0.135294
N2	1	I	7867884	G	GA	R11A5.6	HIGH	frameshift_variant	OTHER	TRUE	FALSE	14	3	17	14,3	1	Insertion	0.176471
N2	1	I	7892874	G	C	F55D12.2	LOW	synonymous_variant	SILENT	FALSE	FALSE	10	2	12	10,2	1	SNP	0.166667
N2	1	I	7892875	T	A	F55D12.2	MODERATE	missense_variant	MISSENSE	FALSE	FALSE	10	2	12	10,2	1	SNP	0.166667
N2	1	I	7908745	C	CT	F55D12.5	HIGH	frameshift_variant	OTHER	TRUE	FALSE	30	5	35	30,5	1	Insertion	0.142857
N2	1	I	7934394	C	CT	nmy-2	HIGH	frameshift_variant	OTHER	FALSE	FALSE	75	11	86	75,11	1	Insertion	0.127907
N2	1	I	7937141	C	CA	T22C1.1	HIGH	frameshift_variant	OTHER	TRUE	FALSE	46	9	55	46,9	1	Insertion	0.163636
N2	1	I	7937365	G	GA	T22C1.1	HIGH	frameshift_variant	OTHER	TRUE	FALSE	200	30	230	200,30	1	Insertion	0.130435
N2	1	I	7941357	G	GA	T22C1.5	HIGH	frameshift_variant	OTHER	TRUE	FALSE	58	17	75	58,17	1	Insertion	0.226667
N2	1	I	7949737	G	GT	jph-1	HIGH	frameshift_variant	OTHER	TRUE	FALSE	7	4	11	7,4	1	Insertion	0.363636
N2	1	I	7968053	C	CT	T22C1.11	HIGH	frameshift_variant	OTHER	TRUE	FALSE	10	4	14	10,4	1	Insertion	0.285714
N2	1	I	8016385	A	AT	rskn-2	HIGH	frameshift_variant	OTHER	TRUE	FALSE	14	3	17	14,3	1	Insertion	0.176471
N2	1	I	8025197	C	CT	C54G4.9	HIGH	frameshift_variant	OTHER	TRUE	FALSE	24	4	28	24,4	1	Insertion	0.142857
N2	1	I	8042130	T	A	vacl-14	LOW	synonymous_variant	SILENT	FALSE	FALSE	11	4	15	11,4	1	SNP	0.266667
N2	1	I	8042133	T	A	vacl-14	LOW	synonymous_variant	SILENT	FALSE	FALSE	12	5	17	12,5	1	SNP	0.294118
N2	1	I	8050646	G	GA	apr-1	HIGH	frameshift_variant	OTHER	TRUE	FALSE	17	7	24	17,7	1	Insertion	0.291667
N2	1	I	8092109	C	CA	rme-8	HIGH	frameshift_variant	OTHER	TRUE	FALSE	31	5	36	31,5	1	Insertion	0.138889
N2	1	I	8096866	G	GT	F18C12.3	HIGH	frameshift_variant	OTHER	TRUE	FALSE	46	7	53	46,7	1	Insertion	0.132075
N2	1	I	8127634	C	CA	mau-2	HIGH	frameshift_variant	OTHER	TRUE	FALSE	14	4	18	14,4	1	Insertion	0.222222
N2	1	I	8134652	T	C	T28B8.1	MODERATE	missense_variant	MISSENSE	FALSE	FALSE	20	13	33	20,13	1	SNP	0.393939
N2	1	I	8255810	G	GA	nol-16	HIGH	frameshift_variant	OTHER	TRUE	FALSE	114	14	128	114,14	1	Insertion	0.109375
N2	1	I	8319129	A	AT	F52B5.3	HIGH	frameshift_variant	OTHER	TRUE	FALSE	13	4	17	13,4	1	Insertion	0.235294
N2	1	I	8323630	T	G	F52B5.3	MODERATE	missense_variant	MISSENSE	FALSE	FALSE	53	10	63	53,10	1	SNP	0.15873
N2	1	I	8366606	C	CT	tbcd-1	HIGH	frameshift_variant	OTHER	TRUE	FALSE	24	7	31	24,7	1	Insertion	0.225806
N2	1	I	8397132	G	GA	ngp-1	HIGH	frameshift_variant	OTHER	TRUE	FALSE	29	5	34	29,5	1	Insertion	0.147059
N2	1	I	8488688	C	CA	D1081.7	HIGH	frameshift_variant	OTHER	TRUE	FALSE	101	24	125	101,24	1	Insertion	0.192
N2	1	I	8527059	C	CT	K02B12.7	HIGH	frameshift_variant	OTHER	FALSE	FALSE	14	3	17	14,3	1	Insertion	0.176471
N2	1	I	8531238	C	CA	zhp-3	HIGH	frameshift_variant	OTHER	TRUE	FALSE	26	4	30	26,4	1	Insertion	0.133333
N2	1	I	8576081	C	CA	rskn-1	HIGH	frameshift_variant	OTHER	TRUE	FALSE	53	10	63	53,10	1	Insertion	0.15873
N2	1	I	8601592	C	CA	snrp-27	HIGH	frameshift_variant	OTHER	TRUE	FALSE	99	17	116	99,17	1	Insertion	0.146552
N2	1	I	8640766	G	GA	F43G9.12	HIGH	frameshift_variant	OTHER	TRUE	FALSE	81	12	93	81,12	1	Insertion	0.129032
N2	1	I	8667743	C	CA	K07A12.1	HIGH	frameshift_variant	OTHER	TRUE	FALSE	21	5	26	21,5	1	Insertion	0.192308
N2	1	I	8696302	G	C	pbs-7	LOW	5_prime_UTR_premature_start_codon_gain_variant	OTHER	FALSE	FALSE	8	2	10	8,2	1	SNP	0.2
N2	1	I	8703023	G	GA	cdk-8	HIGH	frameshift_variant	OTHER	TRUE	FALSE	15	3	18	15,3	1	Insertion	0.166667
N2	1	I	8738903	C	CA	gls-1	HIGH	frameshift_variant	OTHER	TRUE	FALSE	80	13	93	80,13	1	Insertion	0.139785
N2	1	I	8753111	G	GA	imp-1	HIGH	frameshift_variant	OTHER	TRUE	FALSE	23	4	27	23,4	1	Insertion	0.148148
N2	1	I	8756132	C	CT	C36B1.11	HIGH	frameshift_variant	OTHER	TRUE	FALSE	51	11	62	51,11	1	Insertion	0.177419
N2	1	I	8770968	A	AT	trt-1	HIGH	frameshift_variant	OTHER	TRUE	FALSE	20	4	24	20,4	1	Insertion	0.166667
N2	1	I	8806857	C	CT	cids-2	HIGH	frameshift_variant	OTHER	TRUE	FALSE	17	3	20	17,3	1	Insertion	0.15
N2	1	I	8820652	G	GA	F36A2.9	HIGH	frameshift_variant	OTHER	TRUE	FALSE	40	7	47	40,7	1	Insertion	0.148936
N2	1	I	8965101	AT	A	snpc-4	HIGH	frameshift_variant	OTHER	TRUE	FALSE	10	2	12	10,2	1	Deletion	0.166667
N2	1	I	8971386	C	CA	thoc-3	HIGH	frameshift_variant	OTHER	TRUE	FALSE	19	4	23	19,4	1	Insertion	0.173913
N2	1	I	8976752	T	A	fasn-1	LOW	synonymous_variant	SILENT	FALSE	FALSE	14	2	16	14,2	1	SNP	0.125
N2	1	I	8976754	G	A	fasn-1	MODERATE	missense_variant	MISSENSE	FALSE	FALSE	14	2	16	14,2	1	SNP	0.125
N2	1	I	9061972	C	CT	prmt-7	HIGH	frameshift_variant	OTHER	TRUE	FALSE	10	5	15	10,5	1	Insertion	0.333333
N2	1	I	9079179	C	CT	chaf-1	HIGH	frameshift_variant	OTHER	TRUE	FALSE	37	8	45	37,8	1	Insertion	0.177778
N2	1	I	9136302	A	AT	ZK858.5	HIGH	frameshift_variant	OTHER	TRUE	FALSE	16	3	19	16,3	1	Insertion	0.157895
N2	1	I	9160699	C	CT	clsp-1	HIGH	frameshift_variant	OTHER	TRUE	FALSE	27	4	31	27,4	1	Insertion	0.129032
N2	1	I	9161367	G	GT	clsp-1	HIGH	frameshift_variant	OTHER	TRUE	FALSE	59	15	74	59,15	1	Insertion	0.202703
N2	1	I	9162215	A	AT	clsp-1	HIGH	frameshift_variant	OTHER	TRUE	FALSE	15	3	18	15,3	1	Insertion	0.166667
N2	1	I	9281927	CT	C	rpoa-2	HIGH	frameshift_variant	OTHER	TRUE	FALSE	32	4	36	32,4	1	Deletion	0.111111
N2	1	I	9311547	G	GA	uev-3	HIGH	frameshift_variant	OTHER	TRUE	FALSE	7	3	10	7,3	1	Insertion	0.3
N2	1	I	9312012	T	C	uev-3	LOW	synonymous_variant	SILENT	FALSE	FALSE	9	4	13	9,4	1	SNP	0.307692
N2	1	I	9369061	C	CT	ppfr-1	HIGH	frameshift_variant	OTHER	TRUE	FALSE	16	8	24	16,8	1	Insertion	0.333333
N2	1	I	9627385	C	CA	hsr-9	HIGH	frameshift_variant	OTHER	TRUE	FALSE	67	10	77	67,10	1	Insertion	0.12987
N2	1	I	9629114	G	GA	hsr-9	HIGH	frameshift_variant	OTHER	TRUE	FALSE	132	22	154	132,22	1	Insertion	0.142857
N2	1	I	9662708	G	GT	npp-14	HIGH	frameshift_variant	OTHER	TRUE	FALSE	37	5	42	37,5	1	Insertion	0.119048
N2	1	I	9662863	A	AT	npp-14	HIGH	frameshift_variant	OTHER	TRUE	FALSE	43	8	51	43,8	1	Insertion	0.156863
N2	1	I	9727953	C	CT	ocrl-1	HIGH	frameshift_variant	OTHER	FALSE	FALSE	35	5	40	35,5	1	Insertion	0.125
N2	1	I	9772144	C	CT	F26E4.4	HIGH	frameshift_variant	OTHER	TRUE	FALSE	66	12	78	66,12	1	Insertion	0.153846
N2	1	I	9862390	C	CA	K10C3.4	LOW	splice_region_variant	OTHER	FALSE	FALSE	10	3	13	10,3	1	Insertion	0.230769
N2	1	I	9936740	A	AT	Y106G6A.1	HIGH	frameshift_variant	OTHER	TRUE	FALSE	14	4	18	14,4	1	Insertion	0.222222
N2	1	I	9938108	C	CT	Y106G6A.1	HIGH	frameshift_variant	OTHER	FALSE	FALSE	21	5	26	21,5	1	Insertion	0.192308
N2	1	I	9966672	C	CA	mom-5	HIGH	frameshift_variant	OTHER	TRUE	FALSE	47	9	56	47,9	1	Insertion	0.160714
N2	1	I	10162430	G	GA	C25A1.1	HIGH	frameshift_variant	OTHER	TRUE	FALSE	26	4	30	26,4	1	Insertion	0.133333
N2	1	I	10162437	G	A	C25A1.1	MODERATE	missense_variant	MISSENSE	FALSE	FALSE	26	4	30	26,4	1	SNP	0.133333
N2	1	I	10179271	C	CA	C25A1.16	HIGH	frameshift_variant	OTHER	TRUE	FALSE	57	27	84	57,27	1	Insertion	0.321429
N2	1	I	10188350	C	CT	dao-5	HIGH	frameshift_variant	OTHER	TRUE	FALSE	79	13	92	79,13	1	Insertion	0.141304
N2	1	I	10188440	C	CT	dao-5	HIGH	frameshift_variant	OTHER	TRUE	FALSE	40	6	46	40,6	1	Insertion	0.130435
N2	1	I	10188539	C	CT	dao-5	HIGH	frameshift_variant	OTHER	TRUE	FALSE	31	7	38	31,7	1	Insertion	0.184211
N2	1	I	10190466	A	AT	dao-5	HIGH	frameshift_variant	OTHER	TRUE	FALSE	101	12	113	101,12	1	Insertion	0.106195
N2	1	I	10224236	C	CTT	ced-12	HIGH	frameshift_variant	OTHER	TRUE	FALSE	40	4	44	40,4	1	Insertion	0.0909091
N2	1	I	10266739	A	G	ZC247.1	MODERATE	missense_variant	MISSENSE	FALSE	FALSE	17	40	57	17,40	1	SNP	0.701754
N2	1	I	10266776	G	A	ZC247.1	LOW	synonymous_variant	SILENT	FALSE	FALSE	41	28	69	41,28	1	SNP	0.405797
N2	1	I	10271165	G	A	ZC247.1	LOW	synonymous_variant	SILENT	FALSE	FALSE	30	4	34	30,4	1	SNP	0.117647
N2	1	I	10271179	G	C	ZC247.1	MODERATE	missense_variant	MISSENSE	FALSE	FALSE	22	4	26	22,4	1	SNP	0.153846
N2	1	I	10271228	T	C	ZC247.1	LOW	synonymous_variant	SILENT	FALSE	FALSE	14	3	17	14,3	1	SNP	0.176471
N2	1	I	10272948	G	A	ZC247.1	MODERATE	missense_variant	MISSENSE	FALSE	FALSE	6	4	10	6,4	1	SNP	0.4
N2	1	I	10333026	C	CT	ZC434.4	HIGH	frameshift_variant	OTHER	FALSE	FALSE	30	6	36	30,6	1	Insertion	0.166667
N2	1	I	10337439	G	GA	ears-1	HIGH	frameshift_variant	OTHER	TRUE	FALSE	57	8	65	57,8	1	Insertion	0.123077
N2	1	I	10440183	A	AT	pdpr-1	HIGH	frameshift_variant	OTHER	TRUE	FALSE	11	5	16	11,5	1	Insertion	0.3125
N2	1	I	10476879	G	GT	row-1	HIGH	frameshift_variant	OTHER	TRUE	FALSE	27	4	31	27,4	1	Insertion	0.129032
N2	1	I	10605373	G	GT	pash-1	HIGH	frameshift_variant	OTHER	TRUE	FALSE	34	6	40	34,6	1	Insertion	0.15
N2	1	I	10626384	G	GA	B0511.6	HIGH	frameshift_variant	OTHER	TRUE	FALSE	22	6	28	22,6	1	Insertion	0.214286
N2	1	I	10627161	G	A	B0511.6	MODERATE	missense_variant	MISSENSE	FALSE	FALSE	23	4	27	23,4	1	SNP	0.148148
N2	1	I	10659915	C	CA	B0511.12	HIGH	frameshift_variant	OTHER	TRUE	FALSE	9	2	11	9,2	1	Insertion	0.181818
N2	1	I	10664158	C	CT	B0511.12	HIGH	frameshift_variant	OTHER	TRUE	FALSE	135	23	158	135,23	1	Insertion	0.14557
N2	1	I	10714248	C	CA	B0205.1	HIGH	frameshift_variant	OTHER	TRUE	FALSE	9	2	11	9,2	1	Insertion	0.181818
N2	1	I	10716869	C	CT	B0205.1	HIGH	frameshift_variant	OTHER	TRUE	FALSE	15	7	22	15,7	1	Insertion	0.318182
N2	1	I	10733263	C	CT	mrpl-9	HIGH	frameshift_variant	OTHER	TRUE	FALSE	15	3	18	15,3	1	Insertion	0.166667
N2	1	I	10848855	A	AT	vet-2	HIGH	frameshift_variant	OTHER	TRUE	FALSE	9	2	11	9,2	1	Insertion	0.181818
N2	1	I	10849592	G	GA	vet-2	HIGH	frameshift_variant	OTHER	TRUE	FALSE	7	3	10	7,3	1	Insertion	0.3
N2	1	I	10937250	C	CA	prp-17	HIGH	frameshift_variant	OTHER	TRUE	FALSE	124	20	144	124,20	1	Insertion	0.138889
N2	1	I	11036836	C	CT	dxbp-1	HIGH	frameshift_variant	OTHER	TRUE	FALSE	61	9	70	61,9	1	Insertion	0.128571
N2	1	I	11175120	G	GT	F28D9.4	HIGH	frameshift_variant	OTHER	TRUE	FALSE	13	2	15	13,2	1	Insertion	0.133333
N2	1	I	11175121	C	T	F28D9.4	LOW	synonymous_variant	SILENT	FALSE	FALSE	13	2	15	13,2	1	SNP	0.133333
N2	1	I	12647579	G	GT	mcrs-1	HIGH	frameshift_variant	OTHER	TRUE	FALSE	56	11	67	56,11	1	Insertion	0.164179
N2	1	I	12647645	C	CT	mcrs-1	HIGH	frameshift_variant	OTHER	TRUE	FALSE	19	3	22	19,3	1	Insertion	0.136364
N2	1	I	12795553	C	CT	attf-6	HIGH	frameshift_variant	OTHER	TRUE	FALSE	23	7	30	23,7	1	Insertion	0.233333
N2	1	I	12889308	C	CA	pad-1	HIGH	frameshift_variant	OTHER	TRUE	FALSE	10	5	15	10,5	1	Insertion	0.333333
N2	1	I	12891975	C	CA	pad-1	HIGH	frameshift_variant	OTHER	TRUE	FALSE	9	2	11	9,2	1	Insertion	0.181818
N2	1	I	12923137	G	GA	pfn-1	HIGH	frameshift_variant	OTHER	TRUE	FALSE	163	20	183	163,20	1	Insertion	0.10929
N2	1	I	12951398	G	GA	acox-1.4	HIGH	frameshift_variant	OTHER	TRUE	FALSE	9	2	11	9,2	1	Insertion	0.181818
N2	1	I	13165378	G	GA	F22G12.5	HIGH	frameshift_variant	OTHER	TRUE	FALSE	75	14	89	75,14	1	Insertion	0.157303
N2	1	I	13292703	C	CA	top-1	HIGH	frameshift_variant	OTHER	FALSE	FALSE	329	49	378	329,49	1	Insertion	0.12963
N2	1	I	13342244	G	GA	ola-1	HIGH	frameshift_variant	OTHER	TRUE	FALSE	111	18	129	111,18	1	Insertion	0.139535
N2	1	I	13441063	T	C	spr-5	MODERATE	missense_variant	MISSENSE	FALSE	FALSE	17	2	19	17,2	1	SNP	0.105263
N2	1	I	13571953	C	CT	cyn-15	HIGH	frameshift_variant	OTHER	FALSE	FALSE	9	3	12	9,3	1	Insertion	0.25
N2	1	I	13572853	G	GA	nyn-2	HIGH	frameshift_variant	OTHER	TRUE	FALSE	14	4	18	14,4	1	Insertion	0.222222
N2	1	I	13578524	G	GA	gpi-1	HIGH	frameshift_variant	OTHER	TRUE	FALSE	61	10	71	61,10	1	Insertion	0.140845
N2	1	I	13753680	C	CT	gpap-1	HIGH	frameshift_variant	OTHER	TRUE	FALSE	9	4	13	9,4	1	Insertion	0.307692
N2	1	I	13783455	T	C	Y37H9A.3	LOW	synonymous_variant	SILENT	FALSE	FALSE	8	2	10	8,2	1	SNP	0.2
N2	1	I	13785222	AAT	A	Y37H9A.3	HIGH	frameshift_variant	OTHER	TRUE	FALSE	10	2	12	10,2	1	Deletion	0.166667
N2	1	I	13820073	A	T	W09G3.6	MODERATE	missense_variant	MISSENSE	FALSE	FALSE	22	7	29	22,7	1	SNP	0.241379
N2	1	I	13855207	T	TA	W04A8.6	HIGH	frameshift_variant	OTHER	TRUE	FALSE	98	14	112	98,14	1	Insertion	0.125
N2	1	I	13861504	G	A	taf-1	MODERATE	missense_variant	MISSENSE	FALSE	FALSE	11	2	13	11,2	1	SNP	0.153846
N2	1	I	13883551	G	GA	taf-1	HIGH	frameshift_variant	OTHER	TRUE	FALSE	50	8	58	50,8	1	Insertion	0.137931
N2	1	I	13949643	GC	G	usp-3	HIGH	frameshift_variant	OTHER	TRUE	FALSE	11	2	13	11,2	1	Deletion	0.153846
N2	1	I	14113749	C	CA	Y63D3A.7	HIGH	frameshift_variant	OTHER	TRUE	FALSE	41	11	52	41,11	1	Insertion	0.211538
N2	1	I	14355249	C	CT	Y105E8A.2	HIGH	frameshift_variant	OTHER	TRUE	FALSE	20	9	29	20,9	1	Insertion	0.310345
N2	1	I	14407477	G	GA	apg-1	HIGH	frameshift_variant	OTHER	TRUE	FALSE	33	9	42	33,9	1	Insertion	0.214286
N2	1	I	14483156	A	G	yars-1	LOW	synonymous_variant	SILENT	FALSE	FALSE	12	2	14	12,2	1	SNP	0.142857
N2	1	I	14483157	A	G	yars-1	MODERATE	missense_variant	MISSENSE	FALSE	FALSE	12	2	14	12,2	1	SNP	0.142857
N2	1	I	14483159	C	T	yars-1	LOW	synonymous_variant	SILENT	FALSE	FALSE	12	2	14	12,2	1	SNP	0.142857
N2	1	I	14510462	C	CT	Y105E8A.21	HIGH	frameshift_variant	OTHER	FALSE	FALSE	12	3	15	12,3	1	Insertion	0.2
N2	1	I	14561232	C	CT	rpom-1	HIGH	frameshift_variant	OTHER	TRUE	FALSE	17	3	20	17,3	1	Insertion	0.15
N2	1	I	14788626	C	T	F39B2.3	LOW	synonymous_variant	SILENT	FALSE	FALSE	10	2	12	10,2	1	SNP	0.166667
N2	1	I	14788627	C	G	F39B2.3	MODERATE	missense_variant	MISSENSE	FALSE	FALSE	10	2	12	10,2	1	SNP	0.166667
N2	1	I	14789372	G	GT	F39B2.3	HIGH	frameshift_variant	OTHER	TRUE	FALSE	18	3	21	18,3	1	Insertion	0.142857
N2	1	I	14792727	C	CA	hinf-1	HIGH	frameshift_variant	OTHER	TRUE	FALSE	25	6	31	25,6	1	Insertion	0.193548
N2	1	I	14840406	G	GA	F32A7.4	HIGH	frameshift_variant	OTHER	TRUE	FALSE	68	15	83	68,15	1	Insertion	0.180723
N2	1	I	14884022	A	AT	frm-1	HIGH	frameshift_variant	OTHER	TRUE	FALSE	34	7	41	34,7	1	Insertion	0.170732
N2	1	I	14884967	G	GT	frm-1	HIGH	frameshift_variant	OTHER	TRUE	FALSE	19	5	24	19,5	1	Insertion	0.208333
N2	1	I	14892442	C	CT	frm-1	HIGH	frameshift_variant	OTHER	TRUE	FALSE	9	2	11	9,2	1	Insertion	0.181818
N2	1	I	15013320	C	CT	pole-1	HIGH	frameshift_variant	OTHER	TRUE	FALSE	46	6	52	46,6	1	Insertion	0.115385
N2	1	I	15013689	C	CT	pole-1	HIGH	frameshift_variant	OTHER	FALSE	FALSE	41	6	47	41,6	1	Insertion	0.12766
N2	1	II	25240	G	GA	C01B12.8	HIGH	frameshift_variant	OTHER	TRUE	FALSE	63	12	75	63,12	1	Insertion	0.16
N2	1	II	44619	C	CA	nfyc-1	HIGH	frameshift_variant	OTHER	TRUE	FALSE	25	6	31	25,6	1	Insertion	0.193548
N2	1	II	57209	C	CA	sptl-1	HIGH	frameshift_variant	OTHER	TRUE	FALSE	51	10	61	51,10	1	Insertion	0.163934
N2	1	II	70110	AGGAG	A	egl-26	HIGH	frameshift_variant	OTHER	TRUE	FALSE	17	2	19	17,2	1	Deletion	0.105263
N2	1	II	70116	T	TGA	egl-26	HIGH	frameshift_variant	OTHER	TRUE	FALSE	17	2	19	17,2	1	Insertion	0.105263
N2	1	II	70120	A	C	egl-26	LOW	synonymous_variant	SILENT	FALSE	FALSE	16	2	18	16,2	1	SNP	0.111111
N2	1	II	383330	T	A	C03H5.5	LOW	synonymous_variant	SILENT	FALSE	FALSE	12	2	14	12,2	1	SNP	0.142857
N2	1	II	383331	G	A	C03H5.5	MODERATE	missense_variant	MISSENSE	FALSE	FALSE	12	2	14	12,2	1	SNP	0.142857
N2	1	II	471571	G	GT	nol-2	HIGH	frameshift_variant	OTHER	TRUE	FALSE	7	3	10	7,3	1	Insertion	0.3
N2	1	II	706485	G	GA	thoc-1	HIGH	frameshift_variant	OTHER	TRUE	FALSE	18	4	22	18,4	1	Insertion	0.181818
N2	1	II	1126603	G	GA	eri-3	HIGH	frameshift_variant	OTHER	TRUE	FALSE	13	3	16	13,3	1	Insertion	0.1875
N2	1	II	1128707	C	T	taf-6.1	MODERATE	missense_variant	MISSENSE	FALSE	FALSE	11	2	13	11,2	1	SNP	0.153846
N2	1	II	1493919	A	AT	emc-1	HIGH	frameshift_variant	OTHER	TRUE	FALSE	17	4	21	17,4	1	Insertion	0.190476
N2	1	II	1777541	G	GT	math-3	HIGH	frameshift_variant	OTHER	TRUE	FALSE	14	3	17	14,3	1	Insertion	0.176471
N2	1	II	1777564	A	G	math-3	MODERATE	missense_variant	MISSENSE	FALSE	FALSE	13	2	15	13,2	1	SNP	0.133333
N2	1	II	1777567	A	G	math-3	MODERATE	missense_variant	MISSENSE	FALSE	FALSE	13	2	15	13,2	1	SNP	0.133333
N2	1	II	1917637	G	GT	bath-4	HIGH	frameshift_variant	OTHER	TRUE	FALSE	13	3	16	13,3	1	Insertion	0.1875
N2	1	II	1987577	G	A	math-44	MODERATE	missense_variant	MISSENSE	FALSE	FALSE	9	2	11	9,2	1	SNP	0.181818
N2	1	II	2054036	C	CT	F07E5.5	HIGH	frameshift_variant	OTHER	FALSE	FALSE	8	3	11	8,3	1	Insertion	0.272727
N2	1	II	2249319	C	CA	F54A3.2	HIGH	frameshift_variant	OTHER	TRUE	FALSE	13	4	17	13,4	1	Insertion	0.235294
N2	1	II	2446737	A	T	vab-19	LOW	synonymous_variant	SILENT	FALSE	FALSE	9	2	11	9,2	1	SNP	0.181818
N2	1	II	2446738	G	A	vab-19	MODERATE	missense_variant	MISSENSE	FALSE	FALSE	9	2	11	9,2	1	SNP	0.181818
N2	1	II	2791898	C	CA	srpa-72	HIGH	frameshift_variant	OTHER	TRUE	FALSE	37	5	42	37,5	1	Insertion	0.119048
N2	1	II	2979665	G	A	nhr-88	MODERATE	missense_variant	MISSENSE	FALSE	FALSE	9	2	11	9,2	1	SNP	0.181818
N2	1	II	2979674	G	C	nhr-88	MODERATE	missense_variant	MISSENSE	FALSE	FALSE	11	2	13	11,2	1	SNP	0.153846
N2	1	II	2979676	C	T	nhr-88	MODERATE	missense_variant	MISSENSE	FALSE	FALSE	11	2	13	11,2	1	SNP	0.153846
N2	1	II	2979683	G	T	nhr-88	MODERATE	missense_variant	MISSENSE	FALSE	FALSE	12	2	14	12,2	1	SNP	0.142857
N2	1	II	3078962	G	GA	copb-1	HIGH	frameshift_variant	OTHER	TRUE	FALSE	9	4	13	9,4	1	Insertion	0.307692
N2	1	II	3121473	C	CA	T10D4.6	HIGH	frameshift_variant	OTHER	TRUE	FALSE	12	5	17	12,5	1	Insertion	0.294118
N2	1	II	3486716	C	CA	smu-2	HIGH	frameshift_variant	OTHER	TRUE	FALSE	42	8	50	42,8	1	Insertion	0.16
N2	1	II	3503490	G	GA	Y49F6B.2	HIGH	frameshift_variant	OTHER	TRUE	FALSE	12	7	19	12,7	1	Insertion	0.368421
N2	1	II	3519125	T	C	W09G10.t3	LOW	synonymous_variant	SILENT	FALSE	FALSE	36	9	45	36,9	1	SNP	0.2
N2	1	II	3677651	A	G	F19B10.10	MODERATE	missense_variant	MISSENSE	FALSE	FALSE	6	5	11	6,5	1	SNP	0.454545
N2	1	II	3677925	T	G	F19B10.10	MODERATE	missense_variant	MISSENSE	FALSE	FALSE	17	4	21	17,4	1	SNP	0.190476
N2	1	II	3718376	G	C	fbxc-52	MODERATE	missense_variant	MISSENSE	FALSE	FALSE	8	2	10	8,2	1	SNP	0.2
N2	1	II	3718379	A	T	fbxc-52	LOW	synonymous_variant	SILENT	FALSE	FALSE	8	2	10	8,2	1	SNP	0.2
N2	1	II	3786415	T	G	T24E12.1	MODERATE	missense_variant	MISSENSE	FALSE	FALSE	9	2	11	9,2	1	SNP	0.181818
N2	1	II	4283944	G	T	C01F1.6	MODERATE	missense_variant	MISSENSE	FALSE	FALSE	18	2	20	18,2	1	SNP	0.1
N2	1	II	4283945	C	A	C01F1.6	MODERATE	missense_variant	MISSENSE	FALSE	FALSE	18	2	20	18,2	1	SNP	0.1
N2	1	II	4283947	C	T	C01F1.6	MODERATE	missense_variant	MISSENSE	FALSE	FALSE	18	2	20	18,2	1	SNP	0.1
N2	1	II	4304041	G	GA	gtf-2F1	HIGH	frameshift_variant	OTHER	TRUE	FALSE	20	4	24	20,4	1	Insertion	0.166667
N2	1	II	4342221	C	CA	athp-2	HIGH	frameshift_variant	OTHER	TRUE	FALSE	11	3	14	11,3	1	Insertion	0.214286
N2	1	II	4346969	G	GA	athp-2	HIGH	frameshift_variant	OTHER	TRUE	FALSE	26	6	32	26,6	1	Insertion	0.1875
N2	1	II	4421820	C	CA	bpnt-1	HIGH	frameshift_variant	OTHER	TRUE	FALSE	41	10	51	41,10	1	Insertion	0.196078
N2	1	II	4635402	GT	G	che-10	HIGH	frameshift_variant	OTHER	TRUE	FALSE	9	2	11	9,2	1	Deletion	0.181818
N2	1	II	4695231	G	GT	F10G7.5	HIGH	frameshift_variant	OTHER	TRUE	FALSE	8	2	10	8,2	1	Insertion	0.2
N2	1	II	4719131	T	G	F10G7.10	MODERATE	missense_variant	MISSENSE	FALSE	FALSE	10	2	12	10,2	1	SNP	0.166667
N2	1	II	4719132	T	C	F10G7.10	LOW	synonymous_variant	SILENT	FALSE	FALSE	10	2	12	10,2	1	SNP	0.166667
N2	1	II	4737645	C	G	F41C3.5	LOW	5_prime_UTR_premature_start_codon_gain_variant	OTHER	FALSE	FALSE	5	6	11	5,6	1	SNP	0.545455
N2	1	II	4870720	A	AT	col-20	HIGH	frameshift_variant	OTHER	TRUE	FALSE	31	6	37	31,6	1	Insertion	0.162162
N2	1	II	4912462	C	CT	R05F9.11	HIGH	frameshift_variant	OTHER	TRUE	FALSE	8	2	10	8,2	1	Insertion	0.2
N2	1	II	5050764	GA	G	F33G12.6	HIGH	frameshift_variant	OTHER	TRUE	FALSE	9	2	11	9,2	1	Deletion	0.181818
N2	1	II	5063138	T	TA	smc-5	HIGH	frameshift_variant	OTHER	TRUE	FALSE	115	14	129	115,14	1	Insertion	0.108527
N2	1	II	5348119	T	C	F09E5.10	MODERATE	missense_variant	MISSENSE	FALSE	FALSE	4	7	11	4,7	1	SNP	0.636364
N2	1	II	5349591	AC	A	F09E5.10	HIGH	frameshift_variant	OTHER	TRUE	FALSE	3	7	10	3,7	1	Deletion	0.7
N2	1	II	5372580	C	CT	agt-2	HIGH	frameshift_variant	OTHER	TRUE	FALSE	33	9	42	33,9	1	Insertion	0.214286
N2	1	II	5393022	C	CT	brap-2	HIGH	frameshift_variant	OTHER	TRUE	FALSE	9	2	11	9,2	1	Insertion	0.181818
N2	1	II	5419625	G	GA	EEED8.15	HIGH	frameshift_variant	OTHER	TRUE	FALSE	7	3	10	7,3	1	Insertion	0.3
N2	1	II	5509777	C	CT	ZK177.8	HIGH	frameshift_variant	OTHER	TRUE	FALSE	47	6	53	47,6	1	Insertion	0.113208
N2	1	II	5664116	T	TA	mdt-26	HIGH	frameshift_variant	OTHER	TRUE	FALSE	64	8	72	64,8	1	Insertion	0.111111
N2	1	II	5671354	T	TGG	C25H3.11	HIGH	frameshift_variant	OTHER	TRUE	FALSE	14	2	16	14,2	1	Insertion	0.125
N2	1	II	5671355	C	CGG	C25H3.11	HIGH	frameshift_variant	OTHER	TRUE	FALSE	14	2	16	14,2	1	Insertion	0.125
N2	1	II	5671356	AAAGTTT	A	C25H3.11	MODERATE	disruptive_inframe_deletion	OTHER	FALSE	FALSE	14	2	16	14,2	1	Deletion	0.125
N2	1	II	5685120	C	CT	C25H3.11	HIGH	frameshift_variant	OTHER	TRUE	FALSE	11	3	14	11,3	1	Insertion	0.214286
N2	1	II	5691983	A	G	eif-2D	LOW	synonymous_variant	SILENT	FALSE	FALSE	9	4	13	9,4	1	SNP	0.307692
N2	1	II	5820883	T	TA	ehs-1	HIGH	frameshift_variant	OTHER	TRUE	FALSE	21	5	26	21,5	1	Insertion	0.192308
N2	1	II	5838525	G	GT	ZK1248.15	HIGH	frameshift_variant	OTHER	FALSE	FALSE	29	7	36	29,7	1	Insertion	0.194444
N2	1	II	5868263	G	GT	F55C12.5	HIGH	frameshift_variant	OTHER	TRUE	FALSE	28	7	35	28,7	1	Insertion	0.2
N2	1	II	5891174	G	GA	rfip-1	HIGH	frameshift_variant	OTHER	TRUE	FALSE	24	4	28	24,4	1	Insertion	0.142857
N2	1	II	5907272	G	A	F59G1.8	LOW	synonymous_variant	SILENT	FALSE	FALSE	8	3	11	8,3	1	SNP	0.272727
N2	1	II	6047731	G	C	R12C12.6	HIGH	stop_gained	NONSENSE	TRUE	TRUE	11	4	15	11,4	1	SNP	0.266667
N2	1	II	6048529	T	TA	ran-5	HIGH	frameshift_variant	OTHER	TRUE	FALSE	213	39	252	213,39	1	Insertion	0.154762
N2	1	II	6055304	C	CT	R12C12.7	HIGH	frameshift_variant	OTHER	TRUE	FALSE	9	2	11	9,2	1	Insertion	0.181818
N2	1	II	6055905	A	AT	R12C12.7	HIGH	frameshift_variant	OTHER	TRUE	FALSE	65	8	73	65,8	1	Insertion	0.109589
N2	1	II	6271369	C	CG	F13H8.2	HIGH	frameshift_variant	OTHER	TRUE	FALSE	8	2	10	8,2	1	Insertion	0.2
N2	1	II	6271371	C	CG	F13H8.2	HIGH	frameshift_variant	OTHER	TRUE	FALSE	8	2	10	8,2	1	Insertion	0.2
N2	1	II	6271373	GCA	G	F13H8.2	HIGH	frameshift_variant	OTHER	TRUE	FALSE	10	2	12	10,2	1	Deletion	0.166667
N2	1	II	6276689	A	T	bpl-1	MODERATE	missense_variant	MISSENSE	FALSE	FALSE	9	2	11	9,2	1	SNP	0.181818
N2	1	II	6276690	A	G	bpl-1	LOW	synonymous_variant	SILENT	FALSE	FALSE	9	2	11	9,2	1	SNP	0.181818
N2	1	II	6362909	A	T	ani-2	MODERATE	missense_variant	MISSENSE	FALSE	FALSE	68	10	78	68,10	1	SNP	0.128205
N2	1	II	6362916	C	A	ani-2	MODERATE	missense_variant	MISSENSE	FALSE	FALSE	76	12	88	76,12	1	SNP	0.136364
N2	1	II	6362929	G	A	ani-2	LOW	synonymous_variant	SILENT	FALSE	FALSE	86	10	96	86,10	1	SNP	0.104167
N2	1	II	6365737	C	G	clec-88	LOW	5_prime_UTR_premature_start_codon_gain_variant	OTHER	FALSE	FALSE	13	5	18	13,5	1	SNP	0.277778
N2	1	II	6368163	C	CA	ctsa-1	HIGH	frameshift_variant	OTHER	TRUE	FALSE	16	4	20	16,4	1	Insertion	0.2
N2	1	II	6371910	G	GA	lin-23	HIGH	frameshift_variant	OTHER	TRUE	FALSE	17	3	20	17,3	1	Insertion	0.15
N2	1	II	6536430	C	CA	utp-20	HIGH	frameshift_variant	OTHER	FALSE	FALSE	14	4	18	14,4	1	Insertion	0.222222
N2	1	II	6552919	A	AT	utp-20	HIGH	frameshift_variant	OTHER	TRUE	FALSE	17	3	20	17,3	1	Insertion	0.15
N2	1	II	6596314	C	CT	dnj-8	HIGH	frameshift_variant	OTHER	TRUE	FALSE	92	20	112	92,20	1	Insertion	0.178571
N2	1	II	6687115	C	CA	C18H9.3	HIGH	frameshift_variant	OTHER	TRUE	FALSE	31	6	37	31,6	1	Insertion	0.162162
N2	1	II	6964017	AG	A	tra-2	HIGH	frameshift_variant	OTHER	TRUE	FALSE	10	2	12	10,2	1	Deletion	0.166667
N2	1	II	6964565	G	GT	tra-2	HIGH	frameshift_variant	OTHER	TRUE	FALSE	13	6	19	13,6	1	Insertion	0.315789
N2	1	II	7012452	T	C	sqv-7	LOW	synonymous_variant	SILENT	FALSE	FALSE	7	3	10	7,3	1	SNP	0.3
N2	1	II	7019039	G	GT	lst-6	HIGH	frameshift_variant	OTHER	TRUE	FALSE	97	17	114	97,17	1	Insertion	0.149123
N2	1	II	7039490	A	G	cin-4	LOW	synonymous_variant	SILENT	FALSE	FALSE	8	2	10	8,2	1	SNP	0.2
N2	1	II	7039491	G	T	cin-4	HIGH	stop_gained	NONSENSE	TRUE	TRUE	8	2	10	8,2	1	SNP	0.2
N2	1	II	7048926	C	CT	tcer-1	HIGH	frameshift_variant	OTHER	TRUE	FALSE	150	18	168	150,18	1	Insertion	0.107143
N2	1	II	7068799	C	CT	him-14	HIGH	frameshift_variant	OTHER	TRUE	FALSE	8	2	10	8,2	1	Insertion	0.2
N2	1	II	7075143	C	CA	kat-1	HIGH	frameshift_variant	OTHER	TRUE	FALSE	233	26	259	233,26	1	Insertion	0.100386
N2	1	II	7098246	A	C	mct-5	LOW	synonymous_variant	SILENT	FALSE	FALSE	12	6	18	12,6	1	SNP	0.333333
N2	1	II	7105560	C	G	rpl-33	LOW	5_prime_UTR_premature_start_codon_gain_variant	OTHER	FALSE	FALSE	1	23	24	1,23	2	SNP	0.958333
N2	1	II	7119929	G	GA	spon-1	HIGH	frameshift_variant	OTHER	TRUE	FALSE	9	2	11	9,2	1	Insertion	0.181818
N2	1	II	7123998	A	G	F10E7.2	MODERATE	missense_variant	MISSENSE	FALSE	FALSE	11	7	18	11,7	1	SNP	0.388889
N2	1	II	7152649	C	G	fust-1	LOW	5_prime_UTR_premature_start_codon_gain_variant	OTHER	FALSE	FALSE	5	7	12	5,7	1	SNP	0.583333
N2	1	II	7153279	A	C	fust-1	MODERATE	missense_variant	MISSENSE	FALSE	FALSE	73	10	83	73,10	1	SNP	0.120482
N2	1	II	7292567	C	CT	C30G12.6	HIGH	frameshift_variant	OTHER	TRUE	FALSE	36	8	44	36,8	1	Insertion	0.181818
N2	1	II	7364043	G	C	msra-1	LOW	5_prime_UTR_premature_start_codon_gain_variant	OTHER	FALSE	FALSE	2	9	11	2,9	1	SNP	0.818182
N2	1	II	7478088	C	CT	aka-1	HIGH	frameshift_variant	OTHER	TRUE	FALSE	120	17	137	120,17	1	Insertion	0.124088
N2	1	II	7668612	G	GA	lir-2	HIGH	frameshift_variant	OTHER	TRUE	FALSE	27	11	38	27,11	1	Insertion	0.289474
N2	1	II	7683329	G	GA	lin-26	HIGH	frameshift_variant	OTHER	TRUE	FALSE	60	10	70	60,10	1	Insertion	0.142857
N2	1	II	7726659	T	TA	cpna-2	HIGH	frameshift_variant	OTHER	TRUE	FALSE	42	7	49	42,7	1	Insertion	0.142857
N2	1	II	7751352	A	AG	cpna-2	HIGH	frameshift_variant	OTHER	TRUE	FALSE	13	2	15	13,2	1	Insertion	0.133333
N2	1	II	7780526	AT	A	snpc-1.1	HIGH	frameshift_variant	OTHER	TRUE	FALSE	19	3	22	19,3	1	Deletion	0.136364
N2	1	II	7857076	C	CT	cec-3	HIGH	frameshift_variant	OTHER	TRUE	FALSE	41	7	48	41,7	1	Insertion	0.145833
N2	1	II	7868946	G	GT	ztf-17	HIGH	frameshift_variant	OTHER	TRUE	FALSE	12	3	15	12,3	1	Insertion	0.2
N2	1	II	8024519	C	CT	swsn-7	HIGH	frameshift_variant	OTHER	TRUE	FALSE	107	18	125	107,18	1	Insertion	0.144
N2	1	II	8025261	G	GT	swsn-7	HIGH	frameshift_variant	OTHER	TRUE	FALSE	147	21	168	147,21	1	Insertion	0.125
N2	1	II	8063989	A	AT	ufd-2	HIGH	frameshift_variant	OTHER	TRUE	FALSE	17	5	22	17,5	1	Insertion	0.227273
N2	1	II	8082335	C	CA	K02C4.3	HIGH	frameshift_variant	OTHER	TRUE	FALSE	31	5	36	31,5	1	Insertion	0.138889
N2	1	II	8167741	G	GA	rrf-3	HIGH	frameshift_variant	OTHER	TRUE	FALSE	13	3	16	13,3	1	Insertion	0.1875
N2	1	II	8219644	T	TA	ifg-1	HIGH	frameshift_variant	OTHER	TRUE	FALSE	38	8	46	38,8	1	Insertion	0.173913
N2	1	II	8266051	C	CA	K01C8.1	HIGH	frameshift_variant	OTHER	TRUE	FALSE	16	3	19	16,3	1	Insertion	0.157895
N2	1	II	8275048	C	CT	gei-14	HIGH	frameshift_variant	OTHER	TRUE	FALSE	11	3	14	11,3	1	Insertion	0.214286
N2	1	II	8329463	C	A	C26D10.3	MODERATE	missense_variant	MISSENSE	FALSE	FALSE	8	2	10	8,2	1	SNP	0.2
N2	1	II	8329464	C	CTA	C26D10.3	HIGH	frameshift_variant	OTHER	TRUE	FALSE	8	2	10	8,2	1	Insertion	0.2
N2	1	II	8329467	T	A	C26D10.3	LOW	synonymous_variant	SILENT	FALSE	FALSE	8	2	10	8,2	1	SNP	0.2
N2	1	II	8404395	G	GT	skpo-1	HIGH	frameshift_variant	OTHER	TRUE	FALSE	54	7	61	54,7	1	Insertion	0.114754
N2	1	II	8444405	G	GA	evl-20	HIGH	frameshift_variant	OTHER	TRUE	FALSE	11	4	15	11,4	1	Insertion	0.266667
N2	1	II	8580707	G	GA	F54C9.9	HIGH	frameshift_variant	OTHER	TRUE	FALSE	84	17	101	84,17	1	Insertion	0.168317
N2	1	II	8607103	G	GT	F28C6.8	HIGH	frameshift_variant	OTHER	TRUE	FALSE	21	4	25	21,4	1	Insertion	0.16
N2	1	II	8662191	T	TA	eif-2Bepsilon	HIGH	frameshift_variant	OTHER	TRUE	FALSE	22	4	26	22,4	1	Insertion	0.153846
N2	1	II	8698146	C	CT	C34C6.4	HIGH	frameshift_variant	OTHER	TRUE	FALSE	13	3	16	13,3	1	Insertion	0.1875
N2	1	II	8698221	C	CT	C34C6.4	HIGH	frameshift_variant	OTHER	TRUE	FALSE	15	3	18	15,3	1	Insertion	0.166667
N2	1	II	8698328	AGT	A	C34C6.4	HIGH	frameshift_variant	OTHER	TRUE	FALSE	12	2	14	12,2	1	Deletion	0.142857
N2	1	II	8698333	T	C	C34C6.4	LOW	synonymous_variant	SILENT	FALSE	FALSE	12	2	14	12,2	1	SNP	0.142857
N2	1	II	8719103	G	GA	T01B7.5	HIGH	frameshift_variant	OTHER	TRUE	FALSE	50	7	57	50,7	1	Insertion	0.122807
N2	1	II	8763112	C	CT	pah-1	HIGH	frameshift_variant	OTHER	TRUE	FALSE	28	6	34	28,6	1	Insertion	0.176471
N2	1	II	8883243	C	CT	rha-1	HIGH	frameshift_variant	OTHER	TRUE	FALSE	37	7	44	37,7	1	Insertion	0.159091
N2	1	II	8884939	A	G	ddx-19	MODERATE	missense_variant	MISSENSE	FALSE	FALSE	18	2	20	18,2	1	SNP	0.1
N2	1	II	8884951	A	T	ddx-19	MODERATE	missense_variant	MISSENSE	FALSE	FALSE	17	2	19	17,2	1	SNP	0.105263
N2	1	II	9047513	C	CT	T24B8.7	HIGH	frameshift_variant	OTHER	TRUE	FALSE	63	10	73	63,10	1	Insertion	0.136986
N2	1	II	9047652	G	GT	T24B8.7	HIGH	frameshift_variant	OTHER	TRUE	FALSE	202	35	237	202,35	1	Insertion	0.147679
N2	1	II	9057088	G	C	rpl-32	LOW	5_prime_UTR_premature_start_codon_gain_variant	OTHER	FALSE	FALSE	8	17	25	8,17	1	SNP	0.68
N2	1	II	9057089	A	C	rpl-32	LOW	5_prime_UTR_premature_start_codon_gain_variant	OTHER	FALSE	FALSE	16	7	23	16,7	1	SNP	0.304348
N2	1	II	9095034	C	CT	clh-5	HIGH	frameshift_variant	OTHER	FALSE	FALSE	11	3	14	11,3	1	Insertion	0.214286
N2	1	II	9167200	G	GT	T23G7.3	HIGH	frameshift_variant	OTHER	TRUE	FALSE	105	20	125	105,20	1	Insertion	0.16
N2	1	II	9174726	G	GT	sec-5	HIGH	frameshift_variant	OTHER	TRUE	FALSE	14	3	17	14,3	1	Insertion	0.176471
N2	1	II	9176281	G	GT	sec-5	HIGH	frameshift_variant	OTHER	TRUE	FALSE	19	4	23	19,4	1	Insertion	0.173913
N2	1	II	9222079	C	CA	ZK1067.2	HIGH	frameshift_variant	OTHER	TRUE	FALSE	17	3	20	17,3	1	Insertion	0.15
N2	1	II	9340195	T	TA	ttll-12	HIGH	frameshift_variant	OTHER	TRUE	FALSE	49	7	56	49,7	1	Insertion	0.125
N2	1	II	9343254	G	GT	F42A8.1	HIGH	frameshift_variant	OTHER	TRUE	FALSE	44	7	51	44,7	1	Insertion	0.137255
N2	1	II	9597138	CA	C	E02H1.6	HIGH	frameshift_variant	OTHER	TRUE	FALSE	10	2	12	10,2	1	Deletion	0.166667
N2	1	II	9650761	T	TA	ZK1307.9	HIGH	frameshift_variant	OTHER	TRUE	FALSE	39	8	47	39,8	1	Insertion	0.170213
N2	1	II	9749457	C	CA	nos-3	HIGH	frameshift_variant	OTHER	TRUE	FALSE	79	11	90	79,11	1	Insertion	0.122222
N2	1	II	9927031	G	GA	C05C10.2	HIGH	frameshift_variant	OTHER	TRUE	FALSE	44	8	52	44,8	1	Insertion	0.153846
N2	1	II	9946162	T	TA	flad-1	HIGH	frameshift_variant	OTHER	TRUE	FALSE	12	4	16	12,4	1	Insertion	0.25
N2	1	II	10098125	A	C	lact-2	LOW	synonymous_variant	SILENT	FALSE	FALSE	8	2	10	8,2	1	SNP	0.2
N2	1	II	10098127	A	C	lact-2	MODERATE	missense_variant	MISSENSE	FALSE	FALSE	8	2	10	8,2	1	SNP	0.2
N2	1	II	10100666	G	GA	puf-12	HIGH	frameshift_variant	OTHER	TRUE	FALSE	59	10	69	59,10	1	Insertion	0.144928
N2	1	II	10100917	G	GA	puf-12	HIGH	frameshift_variant	OTHER	TRUE	FALSE	35	5	40	35,5	1	Insertion	0.125
N2	1	II	10200302	GAT	G	R05H5.5	HIGH	frameshift_variant	OTHER	TRUE	FALSE	10	2	12	10,2	1	Deletion	0.166667
N2	1	II	10200305	GA	G	R05H5.5	HIGH	frameshift_variant	OTHER	TRUE	FALSE	10	2	12	10,2	1	Deletion	0.166667
N2	1	II	10228096	T	A	plc-3	MODERATE	missense_variant	MISSENSE	FALSE	FALSE	10	2	12	10,2	1	SNP	0.166667
N2	1	II	10228097	T	C	plc-3	LOW	synonymous_variant	SILENT	FALSE	FALSE	10	2	12	10,2	1	SNP	0.166667
N2	1	II	10258444	C	CA	F54B3.1	HIGH	frameshift_variant	OTHER	TRUE	FALSE	47	10	57	47,10	1	Insertion	0.175439
N2	1	II	10264597	T	TA	F54B3.1	HIGH	frameshift_variant	OTHER	TRUE	FALSE	19	3	22	19,3	1	Insertion	0.136364
N2	1	II	10530677	C	T	mab-10	LOW	synonymous_variant	SILENT	FALSE	FALSE	11	5	16	11,5	1	SNP	0.3125
N2	1	II	10580434	G	GA	dohh-1	HIGH	frameshift_variant	OTHER	TRUE	FALSE	19	4	23	19,4	1	Insertion	0.173913
N2	1	II	10783193	C	CT	ect-2	HIGH	frameshift_variant	OTHER	FALSE	FALSE	32	5	37	32,5	1	Insertion	0.135135
N2	1	II	10825369	G	GA	mix-1	HIGH	frameshift_variant	OTHER	TRUE	FALSE	97	12	109	97,12	1	Insertion	0.110092
N2	1	II	10876476	T	C	orc-2	LOW	synonymous_variant	SILENT	FALSE	FALSE	11	2	13	11,2	1	SNP	0.153846
N2	1	II	10876477	G	A	orc-2	MODERATE	missense_variant	MISSENSE	FALSE	FALSE	11	2	13	11,2	1	SNP	0.153846
N2	1	II	11027673	T	G	let-858	LOW	synonymous_variant	SILENT	FALSE	FALSE	104	45	149	104,45	1	SNP	0.302013
N2	1	II	11027682	A	T	let-858	LOW	synonymous_variant	SILENT	FALSE	FALSE	108	44	152	108,44	1	SNP	0.289474
N2	1	II	11027692	C	A	let-858	MODERATE	missense_variant	MISSENSE	FALSE	FALSE	110	41	151	110,41	1	SNP	0.271523
N2	1	II	11048982	G	GT	F33A8.4	HIGH	frameshift_variant	OTHER	FALSE	FALSE	22	5	27	22,5	1	Insertion	0.185185
N2	1	II	11188536	C	CA	F37H8.5	HIGH	frameshift_variant	OTHER	TRUE	FALSE	46	7	53	46,7	1	Insertion	0.132075
N2	1	II	11211821	T	C	srap-1	MODERATE	missense_variant	MISSENSE	FALSE	FALSE	6	10	16	6,10	1	SNP	0.625
N2	1	II	11236390	G	C	cchl-1	LOW	5_prime_UTR_premature_start_codon_gain_variant	OTHER	FALSE	FALSE	6	5	11	6,5	1	SNP	0.454545
N2	1	II	11345209	C	CT	B0491.5	HIGH	frameshift_variant	OTHER	TRUE	FALSE	85	15	100	85,15	1	Insertion	0.15
N2	1	II	11438455	G	C	vha-6	LOW	5_prime_UTR_premature_start_codon_gain_variant	OTHER	FALSE	FALSE	2	13	15	2,13	1	SNP	0.866667
N2	1	II	11472372	C	CT	W02B12.10	HIGH	frameshift_variant	OTHER	TRUE	FALSE	20	4	24	20,4	1	Insertion	0.166667
N2	1	II	11473134	A	AT	W02B12.10	HIGH	frameshift_variant	OTHER	TRUE	FALSE	14	4	18	14,4	1	Insertion	0.222222
N2	1	II	11494336	G	GA	ooc-3	HIGH	frameshift_variant	OTHER	TRUE	FALSE	15	3	18	15,3	1	Insertion	0.166667
N2	1	II	11495004	C	CT	ooc-3	HIGH	frameshift_variant	OTHER	TRUE	FALSE	26	11	37	26,11	1	Insertion	0.297297
N2	1	II	11496076	G	GA	B0334.4	HIGH	frameshift_variant	OTHER	TRUE	FALSE	32	7	39	32,7	1	Insertion	0.179487
N2	1	II	11545698	C	G	dnj-13	LOW	5_prime_UTR_premature_start_codon_gain_variant	OTHER	FALSE	FALSE	35	12	47	35,12	1	SNP	0.255319
N2	1	II	11876829	T	C	top-2	MODERATE	missense_variant	MISSENSE	FALSE	FALSE	68	17	85	68,17	1	SNP	0.2
N2	1	II	11966541	T	A	rab-7	MODERATE	missense_variant	MISSENSE	FALSE	FALSE	11	3	14	11,3	1	SNP	0.214286
N2	1	II	11966546	A	C	rab-7	LOW	synonymous_variant	SILENT	FALSE	FALSE	12	3	15	12,3	1	SNP	0.2
N2	1	II	12073724	C	A	cnt-1	HIGH	stop_gained	NONSENSE	TRUE	TRUE	13	2	15	13,2	1	SNP	0.133333
N2	1	II	12073725	T	A	cnt-1	LOW	synonymous_variant	SILENT	FALSE	FALSE	13	2	15	13,2	1	SNP	0.133333
N2	1	II	12105545	C	CT	Y17G7B.18	HIGH	frameshift_variant	OTHER	TRUE	FALSE	39	7	46	39,7	1	Insertion	0.152174
N2	1	II	12148722	G	A	Y57A10A.2	LOW	synonymous_variant	SILENT	FALSE	FALSE	14	2	16	14,2	1	SNP	0.125
N2	1	II	12151300	T	C	Y57A10A.3	MODERATE	missense_variant	MISSENSE	FALSE	FALSE	9	2	11	9,2	1	SNP	0.181818
N2	1	II	12151301	G	A	Y57A10A.3	LOW	synonymous_variant	SILENT	FALSE	FALSE	9	2	11	9,2	1	SNP	0.181818
N2	1	II	12166388	G	GA	Y57A10A.8	HIGH	frameshift_variant	OTHER	TRUE	FALSE	8	2	10	8,2	1	Insertion	0.2
N2	1	II	12276551	C	CT	tric-1B.2	HIGH	frameshift_variant	OTHER	TRUE	FALSE	32	5	37	32,5	1	Insertion	0.135135
N2	1	II	12279922	C	CA	Y57A10A.29	HIGH	frameshift_variant	OTHER	TRUE	FALSE	21	5	26	21,5	1	Insertion	0.192308
N2	1	II	12603476	G	GA	ceh-100	HIGH	frameshift_variant	OTHER	FALSE	FALSE	34	6	40	34,6	1	Insertion	0.15
N2	1	II	12673635	G	GT	Y38E10A.22	HIGH	frameshift_variant	OTHER	TRUE	FALSE	91	13	104	91,13	1	Insertion	0.125
N2	1	II	12918581	C	CT	F58G1.2	HIGH	frameshift_variant	OTHER	TRUE	FALSE	18	4	22	18,4	1	Insertion	0.181818
N2	1	II	12920985	A	C	wago-4	MODERATE	missense_variant	MISSENSE	FALSE	FALSE	65	14	79	65,14	1	SNP	0.177215
N2	1	II	13088844	CA	C	gcn-2	HIGH	frameshift_variant	OTHER	TRUE	FALSE	9	2	11	9,2	1	Deletion	0.181818
N2	1	II	13100165	C	CT	rict-1	HIGH	frameshift_variant	OTHER	TRUE	FALSE	17	3	20	17,3	1	Insertion	0.15
N2	1	II	13155731	C	CT	hpr-17	HIGH	frameshift_variant	OTHER	TRUE	FALSE	16	6	22	16,6	1	Insertion	0.272727
N2	1	II	13325565	A	T	sam-10	MODERATE	missense_variant	MISSENSE	FALSE	FALSE	14	3	17	14,3	1	SNP	0.176471
N2	1	II	13424622	C	CT	Y48E1C.2	HIGH	frameshift_variant	OTHER	TRUE	FALSE	15	3	18	15,3	1	Insertion	0.166667
N2	1	II	13434247	C	CT	Y48E1C.4	HIGH	frameshift_variant	OTHER	TRUE	FALSE	75	12	87	75,12	1	Insertion	0.137931
N2	1	II	13584016	G	GA	lin-38	HIGH	frameshift_variant	OTHER	TRUE	FALSE	46	8	54	46,8	1	Insertion	0.148148
N2	1	II	13690538	CT	C	rpoa-1	HIGH	frameshift_variant	OTHER	TRUE	FALSE	10	2	12	10,2	1	Deletion	0.166667
N2	1	II	13877818	G	GA	ing-3	HIGH	frameshift_variant	OTHER	TRUE	FALSE	18	3	21	18,3	1	Insertion	0.142857
N2	1	II	13893756	G	GA	mcd-1	HIGH	frameshift_variant	OTHER	TRUE	FALSE	74	11	85	74,11	1	Insertion	0.129412
N2	1	II	13911770	CA	C	W02B8.2	HIGH	frameshift_variant	OTHER	TRUE	FALSE	11	2	13	11,2	1	Deletion	0.153846
N2	1	II	14141954	C	CT	cacn-1	HIGH	frameshift_variant	OTHER	TRUE	FALSE	70	19	89	70,19	1	Insertion	0.213483
N2	1	II	14250692	C	G	hmg-1.1	LOW	5_prime_UTR_premature_start_codon_gain_variant	OTHER	FALSE	FALSE	4	12	16	4,12	1	SNP	0.75
N2	1	II	14297606	C	CT	Y54G11A.7	HIGH	frameshift_variant	OTHER	TRUE	FALSE	9	2	11	9,2	1	Insertion	0.181818
N2	1	II	14390883	C	CA	nurf-1	HIGH	frameshift_variant	OTHER	FALSE	FALSE	50	7	57	50,7	1	Insertion	0.122807
N2	1	II	14411637	G	GT	dsb-2	HIGH	frameshift_variant	OTHER	TRUE	FALSE	15	3	18	15,3	1	Insertion	0.166667
N2	1	II	14487547	C	CT	usp-14	HIGH	frameshift_variant	OTHER	TRUE	FALSE	197	42	239	197,42	1	Insertion	0.175732
N2	1	II	14527102	C	T	F57C2.5	MODERATE	missense_variant	MISSENSE	FALSE	FALSE	8	3	11	8,3	1	SNP	0.272727
N2	1	II	14641573	T	C	atgp-2	LOW	5_prime_UTR_premature_start_codon_gain_variant	OTHER	FALSE	FALSE	24	6	30	24,6	1	SNP	0.2
N2	1	II	15071575	C	CA	Y53F4B.18	HIGH	frameshift_variant	OTHER	TRUE	FALSE	13	6	19	13,6	1	Insertion	0.315789
N2	1	II	15097427	G	GA	Y53F4B.21	HIGH	frameshift_variant	OTHER	TRUE	FALSE	12	4	16	12,4	1	Insertion	0.25
N2	1	III	224301	G	GA	klp-20	HIGH	frameshift_variant	OTHER	TRUE	FALSE	20	7	27	20,7	1	Insertion	0.259259
N2	1	III	246943	G	GA	hpo-29	HIGH	frameshift_variant	OTHER	TRUE	FALSE	248	29	277	248,29	1	Insertion	0.104693
N2	1	III	259351	G	GA	Y50D7A.3	HIGH	frameshift_variant	OTHER	TRUE	FALSE	26	6	32	26,6	1	Insertion	0.1875
N2	1	III	285345	C	CA	taco-1	HIGH	frameshift_variant	OTHER	TRUE	FALSE	38	8	46	38,8	1	Insertion	0.173913
N2	1	III	285465	G	GA	taco-1	HIGH	frameshift_variant	OTHER	TRUE	FALSE	31	9	40	31,9	1	Insertion	0.225
N2	1	III	642128	C	CA	W06E11.1	HIGH	frameshift_variant	OTHER	FALSE	FALSE	22	4	26	22,4	1	Insertion	0.153846
N2	1	III	730039	G	GT	pat-12	HIGH	frameshift_variant	OTHER	TRUE	FALSE	51	8	59	51,8	1	Insertion	0.135593
N2	1	III	789403	T	G	snt-2	MODERATE	missense_variant	MISSENSE	FALSE	FALSE	13	2	15	13,2	1	SNP	0.133333
N2	1	III	789404	C	A	snt-2	MODERATE	missense_variant	MISSENSE	FALSE	FALSE	14	2	16	14,2	1	SNP	0.125
N2	1	III	789425	G	C	snt-2	MODERATE	missense_variant	MISSENSE	FALSE	FALSE	13	2	15	13,2	1	SNP	0.133333
N2	1	III	798015	T	C	trpp-11	MODERATE	missense_variant	MISSENSE	FALSE	FALSE	10	4	14	10,4	1	SNP	0.285714
N2	1	III	891485	C	CT	ztf-18	HIGH	frameshift_variant	OTHER	TRUE	FALSE	10	7	17	10,7	1	Insertion	0.411765
N2	1	III	1037922	C	T	BE0003N10.1	MODERATE	missense_variant	MISSENSE	FALSE	FALSE	14	2	16	14,2	1	SNP	0.125
N2	1	III	1037929	A	G	BE0003N10.1	LOW	synonymous_variant	SILENT	FALSE	FALSE	15	2	17	15,2	1	SNP	0.117647
N2	1	III	1080905	C	G	kbp-4	LOW	5_prime_UTR_premature_start_codon_gain_variant	OTHER	FALSE	FALSE	7	4	11	7,4	1	SNP	0.363636
N2	1	III	1144892	C	CA	smr-1	HIGH	frameshift_variant	OTHER	TRUE	FALSE	40	12	52	40,12	1	Insertion	0.230769
N2	1	III	1406615	G	GT	Y82E9BR.22	HIGH	frameshift_variant	OTHER	TRUE	FALSE	30	7	37	30,7	1	Insertion	0.189189
N2	1	III	1425317	C	CT	Y82E9BR.16	HIGH	frameshift_variant	OTHER	TRUE	FALSE	11	5	16	11,5	1	Insertion	0.3125
N2	1	III	1470992	A	AT	Y82E9BR.18	HIGH	frameshift_variant	OTHER	TRUE	FALSE	13	3	16	13,3	1	Insertion	0.1875
N2	1	III	1471113	G	GT	Y82E9BR.18	HIGH	frameshift_variant	OTHER	TRUE	FALSE	8	3	11	8,3	1	Insertion	0.272727
N2	1	III	1474962	T	C	Y82E9BR.18	MODERATE	missense_variant	MISSENSE	FALSE	FALSE	13	2	15	13,2	1	SNP	0.133333
N2	1	III	1474972	T	C	Y82E9BR.18	LOW	synonymous_variant	SILENT	FALSE	FALSE	12	2	14	12,2	1	SNP	0.142857
N2	1	III	1487540	G	GT	Y82E9BR.19	HIGH	frameshift_variant	OTHER	TRUE	FALSE	16	4	20	16,4	1	Insertion	0.2
N2	1	III	1487570	G	GTT	Y82E9BR.19	HIGH	frameshift_variant	OTHER	TRUE	FALSE	10	2	12	10,2	1	Insertion	0.166667
N2	1	III	1541992	G	GA	cisd-3.2	HIGH	frameshift_variant	OTHER	TRUE	FALSE	37	5	42	37,5	1	Insertion	0.119048
N2	1	III	1618932	G	C	Y22D7AL.10	LOW	5_prime_UTR_premature_start_codon_gain_variant	OTHER	FALSE	FALSE	3	12	15	3,12	1	SNP	0.8
N2	1	III	1619747	C	G	hsp-60	LOW	5_prime_UTR_premature_start_codon_gain_variant	OTHER	FALSE	FALSE	22	20	42	22,20	1	SNP	0.47619
N2	1	III	1837160	T	C	Y39A3CL.1	LOW	synonymous_variant	SILENT	FALSE	FALSE	8	3	11	8,3	1	SNP	0.272727
N2	1	III	1929148	G	A	pqn-41	MODERATE	missense_variant	MISSENSE	FALSE	FALSE	11	2	13	11,2	1	SNP	0.153846
N2	1	III	1929154	C	A	pqn-41	MODERATE	missense_variant	MISSENSE	FALSE	FALSE	12	2	14	12,2	1	SNP	0.142857
N2	1	III	2141733	C	T	frl-1	MODERATE	missense_variant	MISSENSE	FALSE	FALSE	11	2	13	11,2	1	SNP	0.153846
N2	1	III	2154776	G	GA	gcn-1	HIGH	frameshift_variant	OTHER	TRUE	FALSE	17	4	21	17,4	1	Insertion	0.190476
N2	1	III	2189770	T	C	gcn-1	LOW	synonymous_variant	SILENT	FALSE	FALSE	8	2	10	8,2	1	SNP	0.2
N2	1	III	2379797	G	GA	H14E04.2	HIGH	frameshift_variant	OTHER	TRUE	FALSE	32	5	37	32,5	1	Insertion	0.135135
N2	1	III	2409746	T	C	mrpl-30	MODERATE	missense_variant	MISSENSE	FALSE	FALSE	12	2	14	12,2	1	SNP	0.142857
N2	1	III	2409747	A	C	mrpl-30	MODERATE	missense_variant	MISSENSE	FALSE	FALSE	12	2	14	12,2	1	SNP	0.142857
N2	1	III	2464152	G	A	E02H9.3	MODERATE	missense_variant	MISSENSE	FALSE	FALSE	17	7	24	17,7	1	SNP	0.291667
N2	1	III	2538552	T	TA	ceh-44	HIGH	frameshift_variant	OTHER	TRUE	FALSE	18	6	24	18,6	1	Insertion	0.25
N2	1	III	2623229	C	A	Y71H2B.2	MODERATE	missense_variant	MISSENSE	FALSE	FALSE	14	2	16	14,2	1	SNP	0.125
N2	1	III	2623246	G	A	Y71H2B.2	MODERATE	missense_variant	MISSENSE	FALSE	FALSE	13	2	15	13,2	1	SNP	0.133333
N2	1	III	2669068	G	GA	let-805	HIGH	frameshift_variant	OTHER	TRUE	FALSE	9	2	11	9,2	1	Insertion	0.181818
N2	1	III	2773947	C	CT	laf-1	HIGH	frameshift_variant	OTHER	TRUE	FALSE	23	6	29	23,6	1	Insertion	0.206897
N2	1	III	2786199	C	G	cox-6B	LOW	5_prime_UTR_premature_start_codon_gain_variant	OTHER	FALSE	FALSE	5	7	12	5,7	1	SNP	0.583333
N2	1	III	2807063	C	CA	Y71H2AM.3	HIGH	frameshift_variant	OTHER	TRUE	FALSE	27	4	31	27,4	1	Insertion	0.129032
N2	1	III	2830883	G	GA	Y71H2AM.1	HIGH	frameshift_variant	OTHER	TRUE	FALSE	14	3	17	14,3	1	Insertion	0.176471
N2	1	III	2928859	A	T	cdh-1	LOW	synonymous_variant	SILENT	FALSE	FALSE	8	2	10	8,2	1	SNP	0.2
N2	1	III	2928860	A	T	cdh-1	MODERATE	missense_variant	MISSENSE	FALSE	FALSE	8	2	10	8,2	1	SNP	0.2
N2	1	III	3001192	C	CT	daf-2	HIGH	frameshift_variant	OTHER	TRUE	FALSE	29	7	36	29,7	1	Insertion	0.194444
N2	1	III	3313815	T	TA	ral-1	HIGH	frameshift_variant	OTHER	TRUE	FALSE	14	3	17	14,3	1	Insertion	0.176471
N2	1	III	3398985	C	CA	clpf-1	HIGH	frameshift_variant	OTHER	TRUE	FALSE	8	3	11	8,3	1	Insertion	0.272727
N2	1	III	3503607	G	C	rpl-16	LOW	5_prime_UTR_premature_start_codon_gain_variant	OTHER	FALSE	FALSE	6	50	56	6,50	1	SNP	0.892857
N2	1	III	3514287	C	CT	hmit-1.3	HIGH	frameshift_variant	OTHER	TRUE	FALSE	9	2	11	9,2	1	Insertion	0.181818
N2	1	III	3641370	G	GA	rilp-1	HIGH	frameshift_variant	OTHER	TRUE	FALSE	41	8	49	41,8	1	Insertion	0.163265
N2	1	III	3662090	A	AT	C46F11.4	HIGH	frameshift_variant	OTHER	TRUE	FALSE	8	3	11	8,3	1	Insertion	0.272727
N2	1	III	3712369	CT	C	alkb-8	HIGH	frameshift_variant	OTHER	TRUE	FALSE	11	2	13	11,2	1	Deletion	0.153846
N2	1	III	3714216	G	GA	nrde-1	HIGH	frameshift_variant	OTHER	TRUE	FALSE	31	5	36	31,5	1	Insertion	0.138889
N2	1	III	3724775	A	AT	C14B1.12	HIGH	frameshift_variant	OTHER	TRUE	FALSE	31	5	36	31,5	1	Insertion	0.138889
N2	1	III	3731984	C	CA	evl-18	HIGH	frameshift_variant	OTHER	TRUE	FALSE	42	6	48	42,6	1	Insertion	0.125
N2	1	III	3906426	A	AT	mmcm-1	HIGH	frameshift_variant	OTHER	TRUE	FALSE	38	6	44	38,6	1	Insertion	0.136364
N2	1	III	3918011	C	CA	ccdc-47	HIGH	frameshift_variant	OTHER	TRUE	FALSE	197	35	232	197,35	1	Insertion	0.150862
N2	1	III	3966581	C	CT	msi-1	HIGH	frameshift_variant	OTHER	TRUE	FALSE	9	2	11	9,2	1	Insertion	0.181818
N2	1	III	3967103	C	CT	msi-1	HIGH	frameshift_variant	OTHER	TRUE	FALSE	15	4	19	15,4	1	Insertion	0.210526
N2	1	III	3972749	G	GT	R10E9.4	HIGH	frameshift_variant	OTHER	TRUE	FALSE	13	3	16	13,3	1	Insertion	0.1875
N2	1	III	4167419	C	CT	ccdc-55	HIGH	frameshift_variant	OTHER	TRUE	FALSE	19	4	23	19,4	1	Insertion	0.173913
N2	1	III	4192877	T	TA	dnj-16	HIGH	frameshift_variant	OTHER	TRUE	FALSE	32	10	42	32,10	1	Insertion	0.238095
N2	1	III	4206274	C	G	R74.8	LOW	5_prime_UTR_premature_start_codon_gain_variant	OTHER	FALSE	FALSE	1	15	16	1,15	2	SNP	0.9375
N2	1	III	4244205	C	CT	zhit-2	HIGH	frameshift_variant	OTHER	TRUE	FALSE	37	9	46	37,9	1	Insertion	0.195652
N2	1	III	4245133	G	GT	Y44F5A.1	HIGH	frameshift_variant	OTHER	TRUE	FALSE	52	7	59	52,7	1	Insertion	0.118644
N2	1	III	4289766	A	C	mcm-5	LOW	synonymous_variant	SILENT	FALSE	FALSE	51	11	62	51,11	1	SNP	0.177419
N2	1	III	4290252	C	CT	mcm-5	HIGH	frameshift_variant	OTHER	TRUE	FALSE	77	20	97	77,20	1	Insertion	0.206186
N2	1	III	4297530	C	CT	R10E4.11	HIGH	frameshift_variant	OTHER	TRUE	FALSE	14	4	18	14,4	1	Insertion	0.222222
N2	1	III	4304454	G	GT	evl-14	HIGH	frameshift_variant	OTHER	TRUE	FALSE	96	18	114	96,18	1	Insertion	0.157895
N2	1	III	4345944	T	C	hse-5	LOW	synonymous_variant	SILENT	FALSE	FALSE	23	7	30	23,7	1	SNP	0.233333
N2	1	III	4410630	T	C	R07E5.1	LOW	synonymous_variant	SILENT	FALSE	FALSE	14	2	16	14,2	1	SNP	0.125
N2	1	III	4410631	C	A	R07E5.1	LOW	synonymous_variant	SILENT	FALSE	FALSE	14	2	16	14,2	1	SNP	0.125
N2	1	III	4410985	G	GA	R07E5.1	HIGH	frameshift_variant	OTHER	TRUE	FALSE	34	6	40	34,6	1	Insertion	0.15
N2	1	III	4578916	C	CA	wdr-48	HIGH	frameshift_variant	OTHER	FALSE	FALSE	39	9	48	39,9	1	Insertion	0.1875
N2	1	III	4585711	C	CA	F35G12.5	HIGH	frameshift_variant	OTHER	TRUE	FALSE	24	5	29	24,5	1	Insertion	0.172414
N2	1	III	4587498	T	G	smc-4	LOW	5_prime_UTR_premature_start_codon_gain_variant	OTHER	FALSE	FALSE	10	8	18	10,8	1	SNP	0.444444
N2	1	III	4692791	C	CT	nifk-1	HIGH	frameshift_variant	OTHER	TRUE	FALSE	99	18	117	99,18	1	Insertion	0.153846
N2	1	III	4720285	G	GT	emb-5	HIGH	frameshift_variant	OTHER	TRUE	FALSE	82	13	95	82,13	1	Insertion	0.136842
N2	1	III	4847846	C	CT	F26A1.13	HIGH	frameshift_variant	OTHER	TRUE	FALSE	18	4	22	18,4	1	Insertion	0.181818
N2	1	III	4860869	C	CT	C35D10.10	HIGH	frameshift_variant	OTHER	FALSE	FALSE	24	5	29	24,5	1	Insertion	0.172414
N2	1	III	4864506	C	CA	coq-8	HIGH	frameshift_variant	OTHER	TRUE	FALSE	69	10	79	69,10	1	Insertion	0.126582
N2	1	III	4896721	C	CGAT	nhl-2	MODERATE	conservative_inframe_insertion	OTHER	FALSE	FALSE	11	2	13	11,2	1	Insertion	0.153846
N2	1	III	4896722	C	G	nhl-2	LOW	synonymous_variant	SILENT	FALSE	FALSE	11	2	13	11,2	1	SNP	0.153846
N2	1	III	4900934	T	C	tag-340	MODERATE	missense_variant	MISSENSE	FALSE	FALSE	17	2	19	17,2	1	SNP	0.105263
N2	1	III	4900935	G	A	tag-340	LOW	synonymous_variant	SILENT	FALSE	FALSE	17	2	19	17,2	1	SNP	0.105263
N2	1	III	4923870	C	CT	set-2	HIGH	frameshift_variant	OTHER	TRUE	FALSE	15	3	18	15,3	1	Insertion	0.166667
N2	1	III	4943367	G	GA	rpb-2	HIGH	frameshift_variant	OTHER	TRUE	FALSE	89	12	101	89,12	1	Insertion	0.118812
N2	1	III	4999814	G	GA	smcr-8	HIGH	frameshift_variant	OTHER	TRUE	FALSE	10	3	13	10,3	1	Insertion	0.230769
N2	1	III	5167132	C	CT	ulp-1	HIGH	frameshift_variant	OTHER	TRUE	FALSE	27	8	35	27,8	1	Insertion	0.228571
N2	1	III	5177009	G	GA	cid-1	HIGH	frameshift_variant	OTHER	TRUE	FALSE	68	17	85	68,17	1	Insertion	0.2
N2	1	III	5191392	G	GA	hira-1	HIGH	frameshift_variant	OTHER	TRUE	FALSE	14	5	19	14,5	1	Insertion	0.263158
N2	1	III	5191399	G	A	hira-1	MODERATE	missense_variant	MISSENSE	FALSE	FALSE	17	4	21	17,4	1	SNP	0.190476
N2	1	III	5203988	A	ATT	morc-1	HIGH	frameshift_variant	OTHER	FALSE	FALSE	13	2	15	13,2	1	Insertion	0.133333
N2	1	III	5227028	C	CT	C34E10.10	HIGH	frameshift_variant	OTHER	TRUE	FALSE	44	7	51	44,7	1	Insertion	0.137255
N2	1	III	5230240	A	AT	atp-2	LOW	splice_region_variant	OTHER	FALSE	FALSE	386	51	437	386,51	1	Insertion	0.116705
N2	1	III	5272973	C	CT	ztf-8	HIGH	frameshift_variant	OTHER	TRUE	FALSE	35	8	43	35,8	1	Insertion	0.186047
N2	1	III	5327849	AT	A	sorf-2	HIGH	frameshift_variant	OTHER	TRUE	FALSE	8	2	10	8,2	1	Deletion	0.2
N2	1	III	5378097	C	CT	paqr-2	HIGH	frameshift_variant	OTHER	TRUE	FALSE	27	6	33	27,6	1	Insertion	0.181818
N2	1	III	5379688	C	CT	paqr-2	HIGH	frameshift_variant	OTHER	TRUE	FALSE	9	2	11	9,2	1	Insertion	0.181818
N2	1	III	5379858	C	CT	paqr-2	HIGH	frameshift_variant	OTHER	FALSE	FALSE	42	7	49	42,7	1	Insertion	0.142857
N2	1	III	5392099	C	G	Y32H12A.8	MODERATE	missense_variant	MISSENSE	FALSE	FALSE	13	2	15	13,2	1	SNP	0.133333
N2	1	III	5392100	T	A	Y32H12A.8	LOW	synonymous_variant	SILENT	FALSE	FALSE	13	2	15	13,2	1	SNP	0.133333
N2	1	III	5393055	A	AT	Y32H12A.8	HIGH	frameshift_variant	OTHER	TRUE	FALSE	13	3	16	13,3	1	Insertion	0.1875
N2	1	III	5433529	C	CT	W03A5.6	HIGH	frameshift_variant	OTHER	TRUE	FALSE	18	3	21	18,3	1	Insertion	0.142857
N2	1	III	5443488	C	CA	disl-2	HIGH	frameshift_variant	OTHER	TRUE	FALSE	204	28	232	204,28	1	Insertion	0.12069
N2	1	III	5465739	T	TA	F48E8.2	HIGH	frameshift_variant	OTHER	TRUE	FALSE	37	10	47	37,10	1	Insertion	0.212766
N2	1	III	5601630	C	CT	madf-11	HIGH	frameshift_variant	OTHER	TRUE	FALSE	10	3	13	10,3	1	Insertion	0.230769
N2	1	III	5604799	T	TA	xnd-1	HIGH	frameshift_variant	OTHER	TRUE	FALSE	58	10	68	58,10	1	Insertion	0.147059
N2	1	III	5679008	G	C	ska-3	LOW	5_prime_UTR_premature_start_codon_gain_variant	OTHER	FALSE	FALSE	10	5	15	10,5	1	SNP	0.333333
N2	1	III	5879902	G	GA	hpo-10	HIGH	frameshift_variant	OTHER	TRUE	FALSE	18	3	21	18,3	1	Insertion	0.142857
N2	1	III	5880807	A	G	hpo-10	MODERATE	missense_variant	MISSENSE	FALSE	FALSE	10	2	12	10,2	1	SNP	0.166667
N2	1	III	5880808	A	T	hpo-10	MODERATE	missense_variant	MISSENSE	FALSE	FALSE	10	2	12	10,2	1	SNP	0.166667
N2	1	III	5959976	G	GT	nop-1	HIGH	frameshift_variant	OTHER	TRUE	FALSE	30	7	37	30,7	1	Insertion	0.189189
N2	1	III	5995549	G	GA	T04C9.1	HIGH	frameshift_variant	OTHER	TRUE	FALSE	31	5	36	31,5	1	Insertion	0.138889
N2	1	III	6119469	C	CA	kin-18	HIGH	frameshift_variant	OTHER	TRUE	FALSE	16	3	19	16,3	1	Insertion	0.157895
N2	1	III	6122643	G	GA	kin-18	HIGH	frameshift_variant	OTHER	TRUE	FALSE	134	27	161	134,27	1	Insertion	0.167702
N2	1	III	6247013	C	CT	gen-1	HIGH	frameshift_variant	OTHER	TRUE	FALSE	12	5	17	12,5	1	Insertion	0.294118
N2	1	III	6357171	C	CA	akap-1	HIGH	frameshift_variant	OTHER	TRUE	FALSE	101	38	139	101,38	1	Insertion	0.273381
N2	1	III	6373437	C	CA	thoc-2	HIGH	frameshift_variant	OTHER	TRUE	FALSE	43	7	50	43,7	1	Insertion	0.14
N2	1	III	6376523	G	GA	nfx-1	HIGH	frameshift_variant	OTHER	TRUE	FALSE	38	7	45	38,7	1	Insertion	0.155556
N2	1	III	6384571	G	GA	let-716	HIGH	frameshift_variant	OTHER	TRUE	FALSE	39	6	45	39,6	1	Insertion	0.133333
N2	1	III	6384683	G	GA	let-716	HIGH	frameshift_variant	OTHER	TRUE	FALSE	52	8	60	52,8	1	Insertion	0.133333
N2	1	III	6387214	C	CA	let-716	HIGH	frameshift_variant	OTHER	TRUE	FALSE	21	5	26	21,5	1	Insertion	0.192308
N2	1	III	6429310	C	CT	C05D11.9	HIGH	frameshift_variant	OTHER	TRUE	FALSE	36	9	45	36,9	1	Insertion	0.2
N2	1	III	6432920	C	CA	txdc-9	HIGH	frameshift_variant	OTHER	TRUE	FALSE	43	7	50	43,7	1	Insertion	0.14
N2	1	III	6460828	C	CA	algn-1	HIGH	frameshift_variant	OTHER	TRUE	FALSE	20	6	26	20,6	1	Insertion	0.230769
N2	1	III	6471242	C	CA	T26A5.2	HIGH	frameshift_variant	OTHER	FALSE	FALSE	12	4	16	12,4	1	Insertion	0.25
N2	1	III	6616423	G	GGATATCA	Y40D12A.1	HIGH	frameshift_variant	OTHER	TRUE	FALSE	14	2	16	14,2	1	Insertion	0.125
N2	1	III	6709739	G	GT	isw-1	HIGH	frameshift_variant	OTHER	TRUE	FALSE	66	9	75	66,9	1	Insertion	0.12
N2	1	III	6722926	C	CA	F37A4.2	HIGH	frameshift_variant	OTHER	TRUE	FALSE	151	30	181	151,30	1	Insertion	0.165746
N2	1	III	6770582	T	C	dig-1	MODERATE	missense_variant	MISSENSE	FALSE	FALSE	15	2	17	15,2	1	SNP	0.117647
N2	1	III	6770583	T	A	dig-1	LOW	synonymous_variant	SILENT	FALSE	FALSE	15	2	17	15,2	1	SNP	0.117647
N2	1	III	6786637	GAGA	G	dig-1	MODERATE	conservative_inframe_deletion	OTHER	FALSE	FALSE	11	2	13	11,2	1	Deletion	0.153846
N2	1	III	6786648	C	G	dig-1	MODERATE	missense_variant	MISSENSE	FALSE	FALSE	11	2	13	11,2	1	SNP	0.153846
N2	1	III	6789656	T	C	dig-1	LOW	synonymous_variant	SILENT	FALSE	FALSE	12	3	15	12,3	1	SNP	0.2
N2	1	III	6789659	A	C	dig-1	LOW	synonymous_variant	SILENT	FALSE	FALSE	12	3	15	12,3	1	SNP	0.2
N2	1	III	6899113	A	G	T07E3.4	MODERATE	missense_variant	MISSENSE	FALSE	FALSE	10	2	12	10,2	1	SNP	0.166667
N2	1	III	6973556	T	C	rfc-4	MODERATE	missense_variant	MISSENSE	FALSE	FALSE	10	2	12	10,2	1	SNP	0.166667
N2	1	III	6973558	T	A	rfc-4	HIGH	stop_gained	NONSENSE	FALSE	FALSE	10	2	12	10,2	1	SNP	0.166667
N2	1	III	6996652	G	C	prk-1	MODERATE	missense_variant	MISSENSE	FALSE	FALSE	9	3	12	9,3	1	SNP	0.25
N2	1	III	6996653	T	A	prk-1	LOW	synonymous_variant	SILENT	FALSE	FALSE	9	3	12	9,3	1	SNP	0.25
N2	1	III	7179591	A	C	rps-14	LOW	5_prime_UTR_premature_start_codon_gain_variant	OTHER	FALSE	FALSE	2	74	76	2,74	2	SNP	0.973684
N2	1	III	7228931	C	CT	R151.8	HIGH	frameshift_variant	OTHER	TRUE	FALSE	18	3	21	18,3	1	Insertion	0.142857
N2	1	III	7277101	G	GT	B0361.6	HIGH	frameshift_variant	OTHER	TRUE	FALSE	15	5	20	15,5	1	Insertion	0.25
N2	1	III	7294061	C	CA	B0361.2	HIGH	frameshift_variant	OTHER	TRUE	FALSE	34	5	39	34,5	1	Insertion	0.128205
N2	1	III	7310758	G	C	F56C9.6	LOW	5_prime_UTR_premature_start_codon_gain_variant	OTHER	FALSE	FALSE	11	9	20	11,9	1	SNP	0.45
N2	1	III	7311294	C	G	F56C9.3	LOW	5_prime_UTR_premature_start_codon_gain_variant	OTHER	FALSE	FALSE	5	7	12	5,7	1	SNP	0.583333
N2	1	III	7352644	G	GT	F08F8.9	HIGH	frameshift_variant	OTHER	TRUE	FALSE	216	42	258	216,42	1	Insertion	0.162791
N2	1	III	7356631	C	CT	F08F8.10	HIGH	frameshift_variant	OTHER	TRUE	FALSE	9	2	11	9,2	1	Insertion	0.181818
N2	1	III	7356834	C	CT	F08F8.10	HIGH	frameshift_variant	OTHER	TRUE	FALSE	27	11	38	27,11	1	Insertion	0.289474
N2	1	III	7358374	G	GT	F08F8.4	HIGH	frameshift_variant	OTHER	TRUE	FALSE	32	5	37	32,5	1	Insertion	0.135135
N2	1	III	7358724	G	GT	F08F8.4	HIGH	frameshift_variant	OTHER	TRUE	FALSE	53	16	69	53,16	1	Insertion	0.231884
N2	1	III	7358893	C	CT	F08F8.4	HIGH	frameshift_variant	OTHER	TRUE	FALSE	54	8	62	54,8	1	Insertion	0.129032
N2	1	III	7379364	C	CT	hmg-4	HIGH	frameshift_variant	OTHER	FALSE	FALSE	45	7	52	45,7	1	Insertion	0.134615
N2	1	III	7706517	G	GT	lin-13	HIGH	frameshift_variant	OTHER	TRUE	FALSE	57	17	74	57,17	1	Insertion	0.22973
N2	1	III	7934400	G	GA	ran-2	HIGH	frameshift_variant	OTHER	TRUE	FALSE	17	6	23	17,6	1	Insertion	0.26087
N2	1	III	8008950	C	CT	cit-1.1	HIGH	frameshift_variant	OTHER	TRUE	FALSE	23	7	30	23,7	1	Insertion	0.233333
N2	1	III	8014663	C	CT	F44B9.5	HIGH	frameshift_variant	OTHER	TRUE	FALSE	15	3	18	15,3	1	Insertion	0.166667
N2	1	III	8017971	G	GT	lin-36	HIGH	frameshift_variant	OTHER	TRUE	FALSE	60	13	73	60,13	1	Insertion	0.178082
N2	1	III	8019387	C	CT	lin-36	HIGH	frameshift_variant	OTHER	TRUE	FALSE	206	37	243	206,37	1	Insertion	0.152263
N2	1	III	8074844	G	GT	dcr-1	HIGH	frameshift_variant	OTHER	TRUE	FALSE	14	4	18	14,4	1	Insertion	0.222222
N2	1	III	8082753	G	GA	apc-2	HIGH	frameshift_variant	OTHER	TRUE	FALSE	14	5	19	14,5	1	Insertion	0.263158
N2	1	III	8084025	A	AT	K06H7.7	HIGH	frameshift_variant	OTHER	TRUE	FALSE	19	4	23	19,4	1	Insertion	0.173913
N2	1	III	8084907	C	CT	K06H7.7	HIGH	frameshift_variant	OTHER	TRUE	FALSE	100	17	117	100,17	1	Insertion	0.145299
N2	1	III	8086321	G	GA	grp-1	HIGH	frameshift_variant	OTHER	TRUE	FALSE	24	5	29	24,5	1	Insertion	0.172414
N2	1	III	8091996	C	CA	idi-1	HIGH	frameshift_variant	OTHER	TRUE	FALSE	37	8	45	37,8	1	Insertion	0.177778
N2	1	III	8253571	G	GA	knl-1	HIGH	frameshift_variant	OTHER	TRUE	FALSE	41	11	52	41,11	1	Insertion	0.211538
N2	1	III	8377578	G	GA	met-2	HIGH	frameshift_variant	OTHER	TRUE	FALSE	29	5	34	29,5	1	Insertion	0.147059
N2	1	III	8404817	C	CT	ubxn-4	HIGH	frameshift_variant	OTHER	TRUE	FALSE	148	37	185	148,37	1	Insertion	0.2
N2	1	III	8430327	A	AT	ZK1236.1	HIGH	frameshift_variant	OTHER	TRUE	FALSE	10	2	12	10,2	1	Insertion	0.166667
N2	1	III	8430330	T	A	ZK1236.1	MODERATE	missense_variant	MISSENSE	FALSE	FALSE	10	2	12	10,2	1	SNP	0.166667
N2	1	III	8446912	G	C	hsp-110	LOW	5_prime_UTR_premature_start_codon_gain_variant	OTHER	FALSE	FALSE	25	10	35	25,10	1	SNP	0.285714
N2	1	III	8447757	C	CA	rpn-3	HIGH	frameshift_variant	OTHER	TRUE	FALSE	44	6	50	44,6	1	Insertion	0.12
N2	1	III	8450185	T	TA	mrpl-32	HIGH	frameshift_variant	OTHER	TRUE	FALSE	20	7	27	20,7	1	Insertion	0.259259
N2	1	III	8507845	T	G	pac-1	MODERATE	missense_variant	MISSENSE	FALSE	FALSE	10	2	12	10,2	1	SNP	0.166667
N2	1	III	8507847	G	C	pac-1	LOW	synonymous_variant	SILENT	FALSE	FALSE	10	2	12	10,2	1	SNP	0.166667
N2	1	III	8631395	C	CA	dnj-10	HIGH	frameshift_variant	OTHER	TRUE	FALSE	18	4	22	18,4	1	Insertion	0.181818
N2	1	III	8678095	C	CT	fli-1	HIGH	frameshift_variant	OTHER	TRUE	FALSE	18	3	21	18,3	1	Insertion	0.142857
N2	1	III	8753856	C	CT	tomm-70	HIGH	frameshift_variant	OTHER	TRUE	FALSE	33	6	39	33,6	1	Insertion	0.153846
N2	1	III	8798995	G	GA	zfp-1	HIGH	frameshift_variant	OTHER	TRUE	FALSE	18	5	23	18,5	1	Insertion	0.217391
N2	1	III	8905960	T	TA	unc-32	HIGH	frameshift_variant	OTHER	TRUE	FALSE	30	6	36	30,6	1	Insertion	0.166667
N2	1	III	8957445	C	CA	ZK643.2	HIGH	frameshift_variant	OTHER	TRUE	FALSE	8	3	11	8,3	1	Insertion	0.272727
N2	1	III	8977666	G	GT	pde-2	HIGH	frameshift_variant	OTHER	TRUE	FALSE	32	5	37	32,5	1	Insertion	0.135135
N2	1	III	9451877	G	GA	F54C8.7	HIGH	frameshift_variant	OTHER	TRUE	FALSE	8	2	10	8,2	1	Insertion	0.2
N2	1	III	9452048	C	T	F54C8.7	MODERATE	missense_variant	MISSENSE	FALSE	FALSE	40	6	46	40,6	1	SNP	0.130435
N2	1	III	9456611	C	G	spk-1	LOW	5_prime_UTR_premature_start_codon_gain_variant	OTHER	FALSE	FALSE	4	11	15	4,11	1	SNP	0.733333
N2	1	III	9494992	C	CA	ctr-9	HIGH	frameshift_variant	OTHER	TRUE	FALSE	26	5	31	26,5	1	Insertion	0.16129
N2	1	III	9515024	G	GT	F55H2.7	HIGH	frameshift_variant	OTHER	TRUE	FALSE	46	10	56	46,10	1	Insertion	0.178571
N2	1	III	9541639	C	CA	mut-7	HIGH	frameshift_variant	OTHER	TRUE	FALSE	13	3	16	13,3	1	Insertion	0.1875
N2	1	III	9543941	G	C	eif-2Balpha	MODERATE	missense_variant	MISSENSE	FALSE	FALSE	17	2	19	17,2	1	SNP	0.105263
N2	1	III	9543944	T	A	eif-2Balpha	MODERATE	missense_variant	MISSENSE	FALSE	FALSE	17	2	19	17,2	1	SNP	0.105263
N2	1	III	9543946	A	C	eif-2Balpha	MODERATE	missense_variant	MISSENSE	FALSE	FALSE	18	2	20	18,2	1	SNP	0.1
N2	1	III	9543948	C	G	eif-2Balpha	MODERATE	missense_variant	MISSENSE	FALSE	FALSE	18	2	20	18,2	1	SNP	0.1
N2	1	III	9553507	T	C	unc-16	LOW	synonymous_variant	SILENT	FALSE	FALSE	24	4	28	24,4	1	SNP	0.142857
N2	1	III	9553508	G	A	unc-16	MODERATE	missense_variant	MISSENSE	FALSE	FALSE	24	4	28	24,4	1	SNP	0.142857
N2	1	III	9629888	G	C	rpac-19	LOW	5_prime_UTR_premature_start_codon_gain_variant	OTHER	FALSE	FALSE	8	3	11	8,3	1	SNP	0.272727
N2	1	III	9747469	T	G	cdk-1	LOW	5_prime_UTR_premature_start_codon_gain_variant	OTHER	FALSE	FALSE	3	11	14	3,11	1	SNP	0.785714
N2	1	III	9749885	C	CT	T05G5.5	HIGH	frameshift_variant	OTHER	TRUE	FALSE	12	5	17	12,5	1	Insertion	0.294118
N2	1	III	9752886	G	C	ech-6	LOW	5_prime_UTR_premature_start_codon_gain_variant	OTHER	FALSE	FALSE	4	19	23	4,19	1	SNP	0.826087
N2	1	III	9761760	CT	C	gcc-2	HIGH	frameshift_variant	OTHER	TRUE	FALSE	31	7	38	31,7	1	Deletion	0.184211
N2	1	III	9777249	C	CA	usp-46	HIGH	frameshift_variant	OTHER	TRUE	FALSE	24	5	29	24,5	1	Insertion	0.172414
N2	1	III	9800370	C	CA	ZK632.2	HIGH	frameshift_variant	OTHER	TRUE	FALSE	35	9	44	35,9	1	Insertion	0.204545
N2	1	III	9956134	C	CT	mog-1	HIGH	frameshift_variant	OTHER	FALSE	FALSE	29	6	35	29,6	1	Insertion	0.171429
N2	1	III	10071196	G	A	T16G12.6	LOW	synonymous_variant	SILENT	FALSE	FALSE	18	2	20	18,2	1	SNP	0.1
N2	1	III	10092496	A	AT	bath-43	HIGH	frameshift_variant	OTHER	TRUE	FALSE	23	5	28	23,5	1	Insertion	0.178571
N2	1	III	10217923	G	GT	rde-4	HIGH	frameshift_variant	OTHER	TRUE	FALSE	152	21	173	152,21	1	Insertion	0.121387
N2	1	III	10218054	C	CT	rde-4	HIGH	frameshift_variant	OTHER	TRUE	FALSE	94	18	112	94,18	1	Insertion	0.160714
N2	1	III	10275036	G	GA	cnk-1	HIGH	frameshift_variant	OTHER	TRUE	FALSE	55	7	62	55,7	1	Insertion	0.112903
N2	1	III	10418080	G	GA	ymel-1	HIGH	frameshift_variant	OTHER	TRUE	FALSE	64	9	73	64,9	1	Insertion	0.123288
N2	1	III	10441039	G	GT	H04D03.2	HIGH	frameshift_variant	OTHER	TRUE	FALSE	25	4	29	25,4	1	Insertion	0.137931
N2	1	III	10441120	G	GT	H04D03.2	HIGH	frameshift_variant	OTHER	TRUE	FALSE	50	7	57	50,7	1	Insertion	0.122807
N2	1	III	10504911	C	CT	taf-11.3	HIGH	frameshift_variant	OTHER	TRUE	FALSE	16	4	20	16,4	1	Insertion	0.2
N2	1	III	10507611	C	CA	sly-1	HIGH	frameshift_variant	OTHER	TRUE	FALSE	12	3	15	12,3	1	Insertion	0.2
N2	1	III	10623356	C	CA	hpr-9	HIGH	frameshift_variant	OTHER	TRUE	FALSE	15	4	19	15,4	1	Insertion	0.210526
N2	1	III	10729127	A	AT	tat-3	HIGH	frameshift_variant	OTHER	TRUE	FALSE	15	7	22	15,7	1	Insertion	0.318182
N2	1	III	10740724	C	CT	K01G5.8	HIGH	frameshift_variant	OTHER	TRUE	FALSE	24	5	29	24,5	1	Insertion	0.172414
N2	1	III	10742435	G	C	tbb-1	LOW	5_prime_UTR_premature_start_codon_gain_variant	OTHER	FALSE	FALSE	3	14	17	3,14	1	SNP	0.823529
N2	1	III	10842296	C	CT	pde-12	HIGH	frameshift_variant	OTHER	TRUE	FALSE	13	4	17	13,4	1	Insertion	0.235294
N2	1	III	10931286	C	T	M142.5	LOW	synonymous_variant	SILENT	FALSE	FALSE	12	2	14	12,2	1	SNP	0.142857
N2	1	III	10931291	G	T	M142.5	MODERATE	missense_variant	MISSENSE	FALSE	FALSE	12	2	14	12,2	1	SNP	0.142857
N2	1	III	10987173	G	A	col-94	LOW	synonymous_variant	SILENT	FALSE	FALSE	30	4	34	30,4	1	SNP	0.117647
N2	1	III	11123079	G	T	Y48A6C.4	MODERATE	missense_variant	MISSENSE	FALSE	FALSE	13	2	15	13,2	1	SNP	0.133333
N2	1	III	11123081	C	T	Y48A6C.4	MODERATE	missense_variant	MISSENSE	FALSE	FALSE	13	2	15	13,2	1	SNP	0.133333
N2	1	III	11164210	AAT	A	cku-70	HIGH	frameshift_variant	OTHER	TRUE	FALSE	13	2	15	13,2	1	Deletion	0.133333
N2	1	III	11343531	G	GT	pen-2	HIGH	frameshift_variant	OTHER	TRUE	FALSE	15	4	19	15,4	1	Insertion	0.210526
N2	1	III	11521281	G	GT	such-1	HIGH	frameshift_variant	OTHER	TRUE	FALSE	35	9	44	35,9	1	Insertion	0.204545
N2	1	III	11628070	GGC	G	gly-8	HIGH	frameshift_variant	OTHER	TRUE	FALSE	16	2	18	16,2	1	Deletion	0.111111
N2	1	III	11762667	G	GA	gbf-1	HIGH	frameshift_variant	OTHER	TRUE	FALSE	11	2	13	11,2	1	Insertion	0.153846
N2	1	III	11765063	C	CT	gbf-1	HIGH	frameshift_variant	OTHER	TRUE	FALSE	13	3	16	13,3	1	Insertion	0.1875
N2	1	III	11828773	C	G	rsp-8	LOW	synonymous_variant	SILENT	FALSE	FALSE	16	3	19	16,3	1	SNP	0.157895
N2	1	III	11828776	T	G	rsp-8	LOW	synonymous_variant	SILENT	FALSE	FALSE	18	3	21	18,3	1	SNP	0.142857
N2	1	III	11828779	C	G	rsp-8	LOW	synonymous_variant	SILENT	FALSE	FALSE	17	3	20	17,3	1	SNP	0.15
N2	1	III	12050329	C	CT	Y79H2A.3	HIGH	frameshift_variant	OTHER	TRUE	FALSE	17	5	22	17,5	1	Insertion	0.227273
N2	1	III	12280616	GA	G	Y75B8A.25	HIGH	frameshift_variant	OTHER	TRUE	FALSE	8	2	10	8,2	1	Deletion	0.2
N2	1	III	12289016	A	C	mrp-8	MODERATE	missense_variant	MISSENSE	FALSE	FALSE	12	2	14	12,2	1	SNP	0.142857
N2	1	III	12289018	T	A	mrp-8	MODERATE	missense_variant	MISSENSE	FALSE	FALSE	15	2	17	15,2	1	SNP	0.117647
N2	1	III	12289021	C	G	mrp-8	MODERATE	missense_variant	MISSENSE	FALSE	FALSE	15	2	17	15,2	1	SNP	0.117647
N2	1	III	12289023	G	T	mrp-8	MODERATE	missense_variant	MISSENSE	FALSE	FALSE	15	2	17	15,2	1	SNP	0.117647
N2	1	III	12496572	TGC	T	Y111B2A.3	HIGH	frameshift_variant	OTHER	FALSE	FALSE	18	2	20	18,2	1	Deletion	0.1
N2	1	III	12496577	G	T	Y111B2A.3	MODERATE	missense_variant	MISSENSE	FALSE	FALSE	18	2	20	18,2	1	SNP	0.1
N2	1	III	12496701	G	A	Y111B2A.3	LOW	synonymous_variant	SILENT	FALSE	FALSE	15	4	19	15,4	1	SNP	0.210526
N2	1	III	12574666	G	GA	aakg-1	HIGH	frameshift_variant	OTHER	TRUE	FALSE	31	6	37	31,6	1	Insertion	0.162162
N2	1	III	12632118	T	TA	pqn-80	HIGH	frameshift_variant	OTHER	TRUE	FALSE	38	6	44	38,6	1	Insertion	0.136364
N2	1	III	12678873	G	A	elpc-2	LOW	synonymous_variant	SILENT	FALSE	FALSE	10	2	12	10,2	1	SNP	0.166667
N2	1	III	12678874	C	A	elpc-2	MODERATE	missense_variant	MISSENSE	FALSE	FALSE	10	2	12	10,2	1	SNP	0.166667
N2	1	III	12936115	CA	C	epg-3	HIGH	frameshift_variant	OTHER	TRUE	FALSE	8	2	10	8,2	1	Deletion	0.2
N2	1	III	13314065	T	G	Y43F4B.10	LOW	5_prime_UTR_premature_start_codon_gain_variant	OTHER	FALSE	FALSE	18	5	23	18,5	1	SNP	0.217391
N2	1	III	13355192	C	G	mtm-6	MODERATE	missense_variant	MISSENSE	FALSE	FALSE	13	2	15	13,2	1	SNP	0.133333
N2	1	III	13355193	G	A	mtm-6	LOW	synonymous_variant	SILENT	FALSE	FALSE	13	2	15	13,2	1	SNP	0.133333
N2	1	III	13392521	C	CT	dnj-17	HIGH	frameshift_variant	OTHER	TRUE	FALSE	33	7	40	33,7	1	Insertion	0.175
N2	1	III	13393112	C	T	dnj-17	MODERATE	missense_variant	MISSENSE	FALSE	FALSE	10	2	12	10,2	1	SNP	0.166667
N2	1	III	13441327	C	CT	cua-1	HIGH	frameshift_variant	OTHER	TRUE	FALSE	25	7	32	25,7	1	Insertion	0.21875
N2	1	III	13461019	G	GT	abcf-2	HIGH	frameshift_variant	OTHER	TRUE	FALSE	72	11	83	72,11	1	Insertion	0.13253
N2	1	III	13462136	C	CT	abcf-2	HIGH	frameshift_variant	OTHER	FALSE	FALSE	19	4	23	19,4	1	Insertion	0.173913
N2	1	III	13468339	T	TA	kel-3	HIGH	frameshift_variant	OTHER	TRUE	FALSE	9	3	12	9,3	1	Insertion	0.25
N2	1	III	13506565	G	GA	T28A8.3	HIGH	frameshift_variant	OTHER	TRUE	FALSE	13	6	19	13,6	1	Insertion	0.315789
N2	1	III	13618943	G	GA	T12D8.9	HIGH	frameshift_variant	OTHER	TRUE	FALSE	12	3	15	12,3	1	Insertion	0.2
N2	1	III	13619843	C	CA	T12D8.9	HIGH	frameshift_variant	OTHER	TRUE	FALSE	16	4	20	16,4	1	Insertion	0.2
N2	1	III	13620888	G	GA	T12D8.9	HIGH	frameshift_variant	OTHER	TRUE	FALSE	49	7	56	49,7	1	Insertion	0.125
N2	1	III	13645964	G	A	set-16	LOW	synonymous_variant	SILENT	FALSE	FALSE	21	4	25	21,4	1	SNP	0.16
N2	1	III	13756260	G	GA	toca-2	HIGH	frameshift_variant	OTHER	TRUE	FALSE	10	5	15	10,5	1	Insertion	0.333333
N2	1	IV	234131	A	T	R02D3.4	MODERATE	missense_variant	MISSENSE	FALSE	FALSE	8	2	10	8,2	1	SNP	0.2
N2	1	IV	234136	G	A	R02D3.4	MODERATE	missense_variant	MISSENSE	FALSE	FALSE	13	2	15	13,2	1	SNP	0.133333
N2	1	IV	396773	C	CA	rrp-8	HIGH	frameshift_variant	OTHER	TRUE	FALSE	29	7	36	29,7	1	Insertion	0.194444
N2	1	IV	432738	G	GT	hum-8	HIGH	frameshift_variant	OTHER	TRUE	FALSE	17	5	22	17,5	1	Insertion	0.227273
N2	1	IV	436601	CA	C	hum-8	HIGH	frameshift_variant	OTHER	TRUE	FALSE	10	2	12	10,2	1	Deletion	0.166667
N2	1	IV	983000	G	GT	plx-1	HIGH	frameshift_variant	OTHER	TRUE	FALSE	11	5	16	11,5	1	Insertion	0.3125
N2	1	IV	1322360	A	G	F53H1.4	MODERATE	missense_variant	MISSENSE	FALSE	FALSE	17	2	19	17,2	1	SNP	0.105263
N2	1	IV	1322361	C	A	F53H1.4	MODERATE	missense_variant	MISSENSE	FALSE	FALSE	18	2	20	18,2	1	SNP	0.1
N2	1	IV	1322362	T	G	F53H1.4	LOW	synonymous_variant	SILENT	FALSE	FALSE	18	2	20	18,2	1	SNP	0.1
N2	1	IV	1322366	C	G	F53H1.4	MODERATE	missense_variant	MISSENSE	FALSE	FALSE	16	2	18	16,2	1	SNP	0.111111
N2	1	IV	1421110	G	GA	jtr-1	HIGH	frameshift_variant	OTHER	TRUE	FALSE	10	4	14	10,4	1	Insertion	0.285714
N2	1	IV	1494676	G	GT	npp-20	HIGH	frameshift_variant	OTHER	TRUE	FALSE	24	4	28	24,4	1	Insertion	0.142857
N2	1	IV	1584794	A	G	npp-8	MODERATE	missense_variant	MISSENSE	FALSE	FALSE	9	2	11	9,2	1	SNP	0.181818
N2	1	IV	1933948	G	GA	denn-4	HIGH	frameshift_variant	OTHER	TRUE	FALSE	24	5	29	24,5	1	Insertion	0.172414
N2	1	IV	1945991	G	GA	denn-4	HIGH	frameshift_variant	OTHER	TRUE	FALSE	10	3	13	10,3	1	Insertion	0.230769
N2	1	IV	1993683	C	CA	xpc-1	HIGH	frameshift_variant	OTHER	FALSE	FALSE	60	15	75	60,15	1	Insertion	0.2
N2	1	IV	1999498	GA	G	xpc-1	HIGH	frameshift_variant	OTHER	TRUE	FALSE	13	2	15	13,2	1	Deletion	0.133333
N2	1	IV	1999502	ACCC	A	xpc-1	MODERATE	conservative_inframe_deletion	OTHER	FALSE	FALSE	14	2	16	14,2	1	Deletion	0.125
N2	1	IV	1999505	C	CATTT	xpc-1	HIGH	frameshift_variant	OTHER	TRUE	FALSE	14	2	16	14,2	1	Insertion	0.125
N2	1	IV	2112901	G	GT	C23H5.8	HIGH	frameshift_variant	OTHER	TRUE	FALSE	13	6	19	13,6	1	Insertion	0.315789
N2	1	IV	2178103	AC	A	hrpu-2	HIGH	frameshift_variant	OTHER	TRUE	FALSE	11	2	13	11,2	1	Deletion	0.153846
N2	1	IV	2345153	G	GT	ppgn-1	HIGH	frameshift_variant	OTHER	TRUE	FALSE	8	2	10	8,2	1	Insertion	0.2
N2	1	IV	2349528	A	T	tftc-1	MODERATE	missense_variant	MISSENSE	FALSE	FALSE	24	6	30	24,6	1	SNP	0.2
N2	1	IV	2374193	C	CA	tftc-1	HIGH	frameshift_variant	OTHER	TRUE	FALSE	15	3	18	15,3	1	Insertion	0.166667
N2	1	IV	2495739	C	G	Y69A2AR.18	LOW	5_prime_UTR_premature_start_codon_gain_variant	OTHER	FALSE	FALSE	3	8	11	3,8	1	SNP	0.727273
N2	1	IV	2644457	T	TG	ric-8	HIGH	frameshift_variant	OTHER	TRUE	FALSE	26	3	29	26,3	1	Insertion	0.103448
N2	1	IV	2644460	C	T	ric-8	MODERATE	missense_variant	MISSENSE	FALSE	FALSE	26	3	29	26,3	1	SNP	0.103448
N2	1	IV	2677010	C	CA	Y94H6A.3	HIGH	frameshift_variant	OTHER	TRUE	FALSE	10	4	14	10,4	1	Insertion	0.285714
N2	1	IV	2782536	C	CT	Y54G2A.12	HIGH	frameshift_variant	OTHER	TRUE	FALSE	23	4	27	23,4	1	Insertion	0.148148
N2	1	IV	3044480	C	CT	eel-1	HIGH	frameshift_variant	OTHER	TRUE	FALSE	123	27	150	123,27	1	Insertion	0.18
N2	1	IV	3514484	C	CT	tsg-101	HIGH	frameshift_variant	OTHER	TRUE	FALSE	29	12	41	29,12	1	Insertion	0.292683
N2	1	IV	3527942	C	CA	M57.2	HIGH	frameshift_variant	OTHER	TRUE	FALSE	30	6	36	30,6	1	Insertion	0.166667
N2	1	IV	3717595	C	T	Y37E11AM.3	LOW	synonymous_variant	SILENT	FALSE	FALSE	14	3	17	14,3	1	SNP	0.176471
N2	1	IV	3803252	C	CT	algn-14	HIGH	frameshift_variant	OTHER	TRUE	FALSE	37	8	45	37,8	1	Insertion	0.177778
N2	1	IV	4280127	GT	G	F15E6.6	HIGH	frameshift_variant	OTHER	TRUE	FALSE	9	2	11	9,2	1	Deletion	0.181818
N2	1	IV	4375914	G	GA	F55F10.1	HIGH	frameshift_variant	OTHER	TRUE	FALSE	49	10	59	49,10	1	Insertion	0.169492
N2	1	IV	4391101	T	A	set-21	MODERATE	missense_variant	MISSENSE	FALSE	FALSE	10	3	13	10,3	1	SNP	0.230769
N2	1	IV	4411614	C	CA	ell-1	HIGH	frameshift_variant	OTHER	TRUE	FALSE	61	13	74	61,13	1	Insertion	0.175676
N2	1	IV	4414533	G	A	ell-1	LOW	synonymous_variant	SILENT	FALSE	FALSE	18	2	20	18,2	1	SNP	0.1
N2	1	IV	4414534	A	G	ell-1	MODERATE	missense_variant	MISSENSE	FALSE	FALSE	16	2	18	16,2	1	SNP	0.111111
N2	1	IV	4470757	ATTG	A	M01H9.3	MODERATE	disruptive_inframe_deletion	OTHER	FALSE	FALSE	17	4	21	17,4	1	Deletion	0.190476
N2	1	IV	4680956	A	T	T22B11.4	MODERATE	missense_variant	MISSENSE	FALSE	FALSE	14	2	16	14,2	1	SNP	0.125
N2	1	IV	4680959	A	T	T22B11.4	MODERATE	missense_variant	MISSENSE	FALSE	FALSE	14	2	16	14,2	1	SNP	0.125
N2	1	IV	4680961	AGGC	A	T22B11.4	MODERATE	disruptive_inframe_deletion	OTHER	FALSE	FALSE	15	2	17	15,2	1	Deletion	0.117647
N2	1	IV	4680965	G	A	T22B11.4	LOW	synonymous_variant	SILENT	FALSE	FALSE	15	2	17	15,2	1	SNP	0.117647
N2	1	IV	4742503	C	CT	hoe-1	HIGH	frameshift_variant	OTHER	TRUE	FALSE	80	10	90	80,10	1	Insertion	0.111111
N2	1	IV	5160568	A	C	C24D10.4	MODERATE	missense_variant	MISSENSE	FALSE	FALSE	8	2	10	8,2	1	SNP	0.2
N2	1	IV	5160569	C	A	C24D10.4	MODERATE	missense_variant	MISSENSE	FALSE	FALSE	8	2	10	8,2	1	SNP	0.2
N2	1	IV	5208364	C	CT	Y59E9AL.36	HIGH	frameshift_variant	OTHER	TRUE	FALSE	9	2	11	9,2	1	Insertion	0.181818
N2	1	IV	5354953	T	TA	Y4C6B.1	HIGH	frameshift_variant	OTHER	TRUE	FALSE	58	11	69	58,11	1	Insertion	0.15942
N2	1	IV	5365600	G	GA	F41H10.4	HIGH	frameshift_variant	OTHER	TRUE	FALSE	8	4	12	8,4	1	Insertion	0.333333
N2	1	IV	5388482	C	CT	elo-6	HIGH	frameshift_variant	OTHER	TRUE	FALSE	51	7	58	51,7	1	Insertion	0.12069
N2	1	IV	5397134	G	GA	ZK616.3	HIGH	frameshift_variant	OTHER	TRUE	FALSE	8	2	10	8,2	1	Insertion	0.2
N2	1	IV	5538570	T	G	drp-1	LOW	synonymous_variant	SILENT	FALSE	FALSE	12	5	17	12,5	1	SNP	0.294118
N2	1	IV	5546165	G	GA	cec-6	HIGH	frameshift_variant	OTHER	TRUE	FALSE	36	5	41	36,5	1	Insertion	0.121951
N2	1	IV	5803993	C	CT	lntl-1	HIGH	frameshift_variant	OTHER	TRUE	FALSE	8	2	10	8,2	1	Insertion	0.2
N2	1	IV	5812174	G	GT	C31H1.8	HIGH	frameshift_variant	OTHER	TRUE	FALSE	47	10	57	47,10	1	Insertion	0.175439
N2	1	IV	5846372	G	C	sams-4	LOW	5_prime_UTR_premature_start_codon_gain_variant	OTHER	FALSE	FALSE	7	5	12	7,5	1	SNP	0.416667
N2	1	IV	5946288	C	CT	inx-7	HIGH	frameshift_variant	OTHER	TRUE	FALSE	9	2	11	9,2	1	Insertion	0.181818
N2	1	IV	5989720	TC	T	unc-44	HIGH	frameshift_variant	OTHER	TRUE	FALSE	11	2	13	11,2	1	Deletion	0.153846
N2	1	IV	6118455	G	GT	zen-4	HIGH	frameshift_variant	OTHER	TRUE	FALSE	30	6	36	30,6	1	Insertion	0.166667
N2	1	IV	6205903	C	CT	C49A9.10	HIGH	frameshift_variant	OTHER	TRUE	FALSE	27	5	32	27,5	1	Insertion	0.15625
N2	1	IV	6227832	G	GA	C49A9.2	HIGH	frameshift_variant	OTHER	FALSE	FALSE	14	2	16	14,2	1	Insertion	0.125
N2	1	IV	6227856	A	T	C49A9.2	MODERATE	missense_variant	MISSENSE	FALSE	FALSE	9	2	11	9,2	1	SNP	0.181818
N2	1	IV	6324178	C	G	sqd-1	LOW	5_prime_UTR_premature_start_codon_gain_variant	OTHER	FALSE	FALSE	3	17	20	3,17	1	SNP	0.85
N2	1	IV	6585211	C	CT	F38A5.2	HIGH	frameshift_variant	OTHER	TRUE	FALSE	29	5	34	29,5	1	Insertion	0.147059
N2	1	IV	6586101	G	GA	dnj-11	HIGH	frameshift_variant	OTHER	TRUE	FALSE	103	13	116	103,13	1	Insertion	0.112069
N2	1	IV	6744459	A	AT	lin-45	HIGH	frameshift_variant	OTHER	TRUE	FALSE	35	6	41	35,6	1	Insertion	0.146341
N2	1	IV	6744772	C	CT	lin-45	HIGH	frameshift_variant	OTHER	TRUE	FALSE	8	2	10	8,2	1	Insertion	0.2
N2	1	IV	6887600	C	CT	T05A12.3	HIGH	frameshift_variant	OTHER	FALSE	FALSE	23	5	28	23,5	1	Insertion	0.178571
N2	1	IV	6887654	G	C	T05A12.3	LOW	5_prime_UTR_premature_start_codon_gain_variant	OTHER	FALSE	FALSE	3	9	12	3,9	1	SNP	0.75
N2	1	IV	6911199	C	CA	ribo-1	HIGH	frameshift_variant	OTHER	TRUE	FALSE	131	20	151	131,20	1	Insertion	0.13245
N2	1	IV	6913758	T	A	T22D1.3	MODERATE	missense_variant	MISSENSE	FALSE	FALSE	30	4	34	30,4	1	SNP	0.117647
N2	1	IV	7006266	G	GA	cht-3	HIGH	frameshift_variant	OTHER	TRUE	FALSE	67	12	79	67,12	1	Insertion	0.151899
N2	1	IV	7014619	G	GA	trxr-1	HIGH	frameshift_variant	OTHER	TRUE	FALSE	101	14	115	101,14	1	Insertion	0.121739
N2	1	IV	7018857	C	CA	C06G3.6	HIGH	frameshift_variant	OTHER	TRUE	FALSE	8	2	10	8,2	1	Insertion	0.2
N2	1	IV	7141462	G	GT	hecd-1	HIGH	frameshift_variant	OTHER	TRUE	FALSE	28	6	34	28,6	1	Insertion	0.176471
N2	1	IV	7149750	C	CT	C34D4.4	HIGH	frameshift_variant	OTHER	TRUE	FALSE	8	2	10	8,2	1	Insertion	0.2
N2	1	IV	7150106	G	GT	C34D4.4	HIGH	frameshift_variant	OTHER	TRUE	FALSE	16	3	19	16,3	1	Insertion	0.157895
N2	1	IV	7162635	C	CT	rpc-1	HIGH	frameshift_variant	OTHER	TRUE	FALSE	27	5	32	27,5	1	Insertion	0.15625
N2	1	IV	7189284	C	G	C42D4.1	LOW	5_prime_UTR_premature_start_codon_gain_variant	OTHER	FALSE	FALSE	22	17	39	22,17	1	SNP	0.435897
N2	1	IV	7215803	C	CA	kcc-1	HIGH	frameshift_variant	OTHER	TRUE	FALSE	44	12	56	44,12	1	Insertion	0.214286
N2	1	IV	7409890	T	C	egl-19	LOW	synonymous_variant	SILENT	FALSE	FALSE	4	7	11	4,7	1	SNP	0.636364
N2	1	IV	7476694	A	AT	F55G1.9	HIGH	frameshift_variant	OTHER	TRUE	FALSE	22	4	26	22,4	1	Insertion	0.153846
N2	1	IV	7552325	G	GT	dif-1	HIGH	frameshift_variant	OTHER	TRUE	FALSE	33	6	39	33,6	1	Insertion	0.153846
N2	1	IV	7561596	C	CT	ima-3	HIGH	frameshift_variant	OTHER	FALSE	FALSE	47	7	54	47,7	1	Insertion	0.12963
N2	1	IV	7582742	T	TA	nol-10	HIGH	frameshift_variant	OTHER	TRUE	FALSE	133	21	154	133,21	1	Insertion	0.136364
N2	1	IV	7583460	G	GA	nol-10	HIGH	frameshift_variant	OTHER	FALSE	FALSE	10	3	13	10,3	1	Insertion	0.230769
N2	1	IV	7681962	C	CA	itr-1	HIGH	frameshift_variant	OTHER	FALSE	FALSE	13	4	17	13,4	1	Insertion	0.235294
N2	1	IV	7687875	C	T	itr-1	MODERATE	missense_variant	MISSENSE	FALSE	FALSE	12	2	14	12,2	1	SNP	0.142857
N2	1	IV	7687880	G	C	itr-1	LOW	synonymous_variant	SILENT	FALSE	FALSE	12	2	14	12,2	1	SNP	0.142857
N2	1	IV	7690694	GCAA	G	itr-1	MODERATE	conservative_inframe_deletion	OTHER	FALSE	FALSE	16	2	18	16,2	1	Deletion	0.111111
N2	1	IV	7831134	G	GA	mvb-12	HIGH	frameshift_variant	OTHER	TRUE	FALSE	13	3	16	13,3	1	Insertion	0.1875
N2	1	IV	7904967	AG	A	C49H3.6	HIGH	frameshift_variant	OTHER	TRUE	FALSE	9	3	12	9,3	1	Deletion	0.25
N2	1	IV	7951427	G	GA	F20D12.2	HIGH	frameshift_variant	OTHER	TRUE	FALSE	11	3	14	11,3	1	Insertion	0.214286
N2	1	IV	8016474	G	GA	C26B2.7	HIGH	frameshift_variant	OTHER	TRUE	FALSE	29	7	36	29,7	1	Insertion	0.194444
N2	1	IV	8075978	G	GA	sax-7	HIGH	frameshift_variant	OTHER	TRUE	FALSE	24	4	28	24,4	1	Insertion	0.142857
N2	1	IV	8130234	G	C	F42G8.10	LOW	5_prime_UTR_premature_start_codon_gain_variant	OTHER	FALSE	FALSE	3	8	11	3,8	1	SNP	0.727273
N2	1	IV	8152612	C	CA	faah-2	HIGH	frameshift_variant	OTHER	TRUE	FALSE	7	4	11	7,4	1	Insertion	0.363636
N2	1	IV	8190825	A	AT	wsp-1	HIGH	frameshift_variant	OTHER	TRUE	FALSE	18	3	21	18,3	1	Insertion	0.142857
N2	1	IV	8295402	T	TG	tbce-1	HIGH	frameshift_variant	OTHER	TRUE	FALSE	11	2	13	11,2	1	Insertion	0.153846
N2	1	IV	8296298	C	CA	tbce-1	HIGH	frameshift_variant	OTHER	TRUE	FALSE	24	6	30	24,6	1	Insertion	0.2
N2	1	IV	8361362	G	GA	sqv-1	HIGH	frameshift_variant	OTHER	TRUE	FALSE	46	8	54	46,8	1	Insertion	0.148148
N2	1	IV	8361374	C	CA	sqv-1	HIGH	frameshift_variant	OTHER	TRUE	FALSE	45	6	51	45,6	1	Insertion	0.117647
N2	1	IV	8365196	C	CA	D2096.12	HIGH	frameshift_variant	OTHER	TRUE	FALSE	51	11	62	51,11	1	Insertion	0.177419
N2	1	IV	8365542	C	CA	D2096.12	HIGH	frameshift_variant	OTHER	TRUE	FALSE	50	8	58	50,8	1	Insertion	0.137931
N2	1	IV	8375858	ATT	A	D2096.7	HIGH	frameshift_variant	OTHER	TRUE	FALSE	11	2	13	11,2	1	Deletion	0.153846
N2	1	IV	8392125	G	C	D2096.11	MODERATE	missense_variant	MISSENSE	FALSE	FALSE	13	2	15	13,2	1	SNP	0.133333
N2	1	IV	8433475	G	A	T26A8.1	MODERATE	missense_variant	MISSENSE	FALSE	FALSE	12	5	17	12,5	1	SNP	0.294118
N2	1	IV	8477620	C	CA	spp-10	HIGH	frameshift_variant	OTHER	TRUE	FALSE	74	9	83	74,9	1	Insertion	0.108434
N2	1	IV	8496286	A	AT	C28C12.12	HIGH	frameshift_variant	OTHER	TRUE	FALSE	23	5	28	23,5	1	Insertion	0.178571
N2	1	IV	8688906	C	CT	hst-1	HIGH	frameshift_variant	OTHER	TRUE	FALSE	11	4	15	11,4	1	Insertion	0.266667
N2	1	IV	8740656	G	GT	F21D5.6	HIGH	frameshift_variant	OTHER	TRUE	FALSE	17	3	20	17,3	1	Insertion	0.15
N2	1	IV	8897841	G	GA	rad-26	HIGH	frameshift_variant	OTHER	TRUE	FALSE	43	7	50	43,7	1	Insertion	0.14
N2	1	IV	8976470	C	CA	C53B4.4	HIGH	frameshift_variant	OTHER	TRUE	FALSE	19	6	25	19,6	1	Insertion	0.24
N2	1	IV	9077304	A	AT	mans-4	HIGH	frameshift_variant	OTHER	TRUE	FALSE	9	4	13	9,4	1	Insertion	0.307692
N2	1	IV	9084320	G	GA	twk-8	HIGH	frameshift_variant	OTHER	TRUE	FALSE	10	2	12	10,2	1	Insertion	0.166667
N2	1	IV	9315728	A	AT	F49C12.9	HIGH	frameshift_variant	OTHER	TRUE	FALSE	32	8	40	32,8	1	Insertion	0.2
N2	1	IV	9341408	C	CT	vps-26	HIGH	frameshift_variant	OTHER	TRUE	FALSE	54	9	63	54,9	1	Insertion	0.142857
N2	1	IV	9391548	C	CT	daf-15	HIGH	frameshift_variant	OTHER	TRUE	FALSE	37	7	44	37,7	1	Insertion	0.159091
N2	1	IV	9776708	G	GT	sna-2	HIGH	frameshift_variant	OTHER	TRUE	FALSE	17	4	21	17,4	1	Insertion	0.190476
N2	1	IV	9800080	G	GA	fat-4	HIGH	frameshift_variant	OTHER	TRUE	FALSE	38	7	45	38,7	1	Insertion	0.155556
N2	1	IV	9804634	AT	A	fat-3	HIGH	frameshift_variant	OTHER	TRUE	FALSE	8	2	10	8,2	1	Deletion	0.2
N2	1	IV	9817915	A	AT	catp-6	HIGH	frameshift_variant	OTHER	TRUE	FALSE	23	4	27	23,4	1	Insertion	0.148148
N2	1	IV	9862355	C	CA	K07F5.14	HIGH	frameshift_variant	OTHER	TRUE	FALSE	71	9	80	71,9	1	Insertion	0.1125
N2	1	IV	9884239	G	GT	F32B6.3	HIGH	frameshift_variant	OTHER	FALSE	FALSE	7	3	10	7,3	1	Insertion	0.3
N2	1	IV	9884746	T	TA	mccc-1	HIGH	frameshift_variant	OTHER	TRUE	FALSE	56	9	65	56,9	1	Insertion	0.138462
N2	1	IV	9925665	C	A	dur-1	MODERATE	missense_variant	MISSENSE	FALSE	FALSE	15	2	17	15,2	1	SNP	0.117647
N2	1	IV	9925666	C	CAG	dur-1	HIGH	frameshift_variant	OTHER	TRUE	FALSE	15	2	17	15,2	1	Insertion	0.117647
N2	1	IV	9931922	C	CT	F25H8.1	HIGH	frameshift_variant	OTHER	TRUE	FALSE	22	4	26	22,4	1	Insertion	0.153846
N2	1	IV	9994948	G	C	uba-1	LOW	5_prime_UTR_premature_start_codon_gain_variant	OTHER	FALSE	FALSE	1	14	15	1,14	2	SNP	0.933333
N2	1	IV	10106294	C	A	dis-3	MODERATE	missense_variant	MISSENSE	FALSE	FALSE	9	2	11	9,2	1	SNP	0.181818
N2	1	IV	10106295	T	G	dis-3	MODERATE	missense_variant	MISSENSE	FALSE	FALSE	9	2	11	9,2	1	SNP	0.181818
N2	1	IV	10125145	C	CT	ctf-18	HIGH	frameshift_variant	OTHER	TRUE	FALSE	10	4	14	10,4	1	Insertion	0.285714
N2	1	IV	10153974	A	C	T14G10.5	MODERATE	missense_variant	MISSENSE	FALSE	FALSE	10	2	12	10,2	1	SNP	0.166667
N2	1	IV	10153975	C	T	T14G10.5	MODERATE	missense_variant	MISSENSE	FALSE	FALSE	10	2	12	10,2	1	SNP	0.166667
N2	1	IV	10168769	C	CT	pxf-1	HIGH	frameshift_variant	OTHER	TRUE	FALSE	29	7	36	29,7	1	Insertion	0.194444
N2	1	IV	10198159	G	GA	gon-4	HIGH	frameshift_variant	OTHER	TRUE	FALSE	40	6	46	40,6	1	Insertion	0.130435
N2	1	IV	10279754	C	CT	thk-1	HIGH	frameshift_variant	OTHER	TRUE	FALSE	23	4	27	23,4	1	Insertion	0.148148
N2	1	IV	10289048	G	GA	ebax-1	HIGH	frameshift_variant	OTHER	TRUE	FALSE	13	4	17	13,4	1	Insertion	0.235294
N2	1	IV	10356368	TG	T	R11A8.1	HIGH	frameshift_variant	OTHER	TRUE	FALSE	10	2	12	10,2	1	Deletion	0.166667
N2	1	IV	10366594	A	AT	pges-2	HIGH	frameshift_variant	OTHER	TRUE	FALSE	70	16	86	70,16	1	Insertion	0.186047
N2	1	IV	10383200	C	CA	mask-1	HIGH	frameshift_variant	OTHER	TRUE	FALSE	219	39	258	219,39	1	Insertion	0.151163
N2	1	IV	10383695	C	CA	mask-1	HIGH	frameshift_variant	OTHER	TRUE	FALSE	54	8	62	54,8	1	Insertion	0.129032
N2	1	IV	10412565	C	CT	R10H10.7	HIGH	frameshift_variant	OTHER	TRUE	FALSE	28	9	37	28,9	1	Insertion	0.243243
N2	1	IV	10417668	C	CT	F13B12.6	HIGH	frameshift_variant	OTHER	TRUE	FALSE	58	8	66	58,8	1	Insertion	0.121212
N2	1	IV	10424079	C	CT	F13B12.1	HIGH	frameshift_variant	OTHER	TRUE	FALSE	63	9	72	63,9	1	Insertion	0.125
N2	1	IV	10471451	T	TA	ugt-44	HIGH	frameshift_variant	OTHER	TRUE	FALSE	15	3	18	15,3	1	Insertion	0.166667
N2	1	IV	10563306	C	CA	him-8	HIGH	frameshift_variant	OTHER	TRUE	FALSE	14	4	18	14,4	1	Insertion	0.222222
N2	1	IV	10563739	G	GA	him-8	HIGH	frameshift_variant	OTHER	TRUE	FALSE	9	2	11	9,2	1	Insertion	0.181818
N2	1	IV	10678819	T	C	epi-1	MODERATE	missense_variant	MISSENSE	FALSE	FALSE	10	2	12	10,2	1	SNP	0.166667
N2	1	IV	10678820	G	C	epi-1	MODERATE	missense_variant	MISSENSE	FALSE	FALSE	10	2	12	10,2	1	SNP	0.166667
N2	1	IV	10678821	T	G	epi-1	MODERATE	missense_variant	MISSENSE	FALSE	FALSE	10	2	12	10,2	1	SNP	0.166667
N2	1	IV	10678826	G	A	epi-1	MODERATE	missense_variant	MISSENSE	FALSE	FALSE	9	2	11	9,2	1	SNP	0.181818
N2	1	IV	10734585	A	C	orc-5	LOW	5_prime_UTR_premature_start_codon_gain_variant	OTHER	FALSE	FALSE	11	5	16	11,5	1	SNP	0.3125
N2	1	IV	10850109	C	CT	T11G6.4	HIGH	frameshift_variant	OTHER	TRUE	FALSE	18	3	21	18,3	1	Insertion	0.142857
N2	1	IV	10925191	C	CA	rbr-2	HIGH	frameshift_variant	OTHER	TRUE	FALSE	37	9	46	37,9	1	Insertion	0.195652
N2	1	IV	11024401	C	T	alh-3	MODERATE	missense_variant	MISSENSE	FALSE	FALSE	9	2	11	9,2	1	SNP	0.181818
N2	1	IV	11024402	T	G	alh-3	MODERATE	missense_variant	MISSENSE	FALSE	FALSE	9	2	11	9,2	1	SNP	0.181818
N2	1	IV	11080571	A	AT	atg-7	HIGH	frameshift_variant	OTHER	TRUE	FALSE	30	5	35	30,5	1	Insertion	0.142857
N2	1	IV	11085372	C	CA	klc-1	HIGH	frameshift_variant	OTHER	TRUE	FALSE	89	11	100	89,11	1	Insertion	0.11
N2	1	IV	11097287	C	T	M7.12	LOW	synonymous_variant	SILENT	FALSE	FALSE	18	4	22	18,4	1	SNP	0.181818
N2	1	IV	11123813	C	CT	spo-11	HIGH	frameshift_variant	OTHER	TRUE	FALSE	8	5	13	8,5	1	Insertion	0.384615
N2	1	IV	11144577	A	T	F01G4.4	LOW	synonymous_variant	SILENT	FALSE	FALSE	36	24	60	36,24	1	SNP	0.4
N2	1	IV	11144984	G	T	F01G4.4	MODERATE	missense_variant	MISSENSE	FALSE	FALSE	21	7	28	21,7	1	SNP	0.25
N2	1	IV	11145032	A	G	F01G4.4	MODERATE	missense_variant	MISSENSE	FALSE	FALSE	44	6	50	44,6	1	SNP	0.12
N2	1	IV	11145033	A	G	F01G4.4	LOW	synonymous_variant	SILENT	FALSE	FALSE	44	6	50	44,6	1	SNP	0.12
N2	1	IV	11145050	T	A	F01G4.4	MODERATE	missense_variant	MISSENSE	FALSE	FALSE	43	6	49	43,6	1	SNP	0.122449
N2	1	IV	11145054	G	A	F01G4.4	LOW	synonymous_variant	SILENT	FALSE	FALSE	42	6	48	42,6	1	SNP	0.125
N2	1	IV	11292144	G	A	F54D1.6	MODERATE	missense_variant	MISSENSE	FALSE	FALSE	10	4	14	10,4	1	SNP	0.285714
N2	1	IV	11313256	C	CT	dnj-2	HIGH	frameshift_variant	OTHER	TRUE	FALSE	11	3	14	11,3	1	Insertion	0.214286
N2	1	IV	11320566	A	AAG	B0035.18	HIGH	frameshift_variant	OTHER	TRUE	FALSE	14	2	16	14,2	1	Insertion	0.125
N2	1	IV	11320842	C	CA	edg-1	HIGH	frameshift_variant	OTHER	FALSE	FALSE	19	3	22	19,3	1	Insertion	0.136364
N2	1	IV	11334300	G	GT	F54E12.2	HIGH	frameshift_variant	OTHER	TRUE	FALSE	62	8	70	62,8	1	Insertion	0.114286
N2	1	IV	11338225	T	C	his-55	LOW	synonymous_variant	SILENT	FALSE	FALSE	6	5	11	6,5	1	SNP	0.454545
N2	1	IV	11338593	T	A	his-56	LOW	synonymous_variant	SILENT	FALSE	FALSE	34	17	51	34,17	1	SNP	0.333333
N2	1	IV	11356792	A	AT	klp-12	HIGH	frameshift_variant	OTHER	TRUE	FALSE	43	8	51	43,8	1	Insertion	0.156863
N2	1	IV	11358360	G	GT	klp-12	HIGH	frameshift_variant	OTHER	TRUE	FALSE	44	7	51	44,7	1	Insertion	0.137255
N2	1	IV	11374700	C	CA	cbd-1	HIGH	frameshift_variant	OTHER	TRUE	FALSE	699	99	798	699,99	1	Insertion	0.12406
N2	1	IV	11400592	G	A	his-66	LOW	synonymous_variant	SILENT	FALSE	FALSE	11	2	13	11,2	1	SNP	0.153846
N2	1	IV	11630912	A	AT	F58B3.4	HIGH	frameshift_variant	OTHER	TRUE	FALSE	30	6	36	30,6	1	Insertion	0.166667
N2	1	IV	11631075	C	CT	F58B3.4	HIGH	frameshift_variant	OTHER	TRUE	FALSE	78	11	89	78,11	1	Insertion	0.123596
N2	1	IV	11637598	T	TA	F58B3.6	HIGH	frameshift_variant	OTHER	TRUE	FALSE	46	19	65	46,19	1	Insertion	0.292308
N2	1	IV	11658520	G	GA	ZK809.5	HIGH	frameshift_variant	OTHER	TRUE	FALSE	50	10	60	50,10	1	Insertion	0.166667
N2	1	IV	11686435	A	AT	ZK792.5	HIGH	frameshift_variant	OTHER	TRUE	FALSE	7	3	10	7,3	1	Insertion	0.3
N2	1	IV	11915690	G	C	fat-6	LOW	5_prime_UTR_premature_start_codon_gain_variant	OTHER	FALSE	FALSE	9	7	16	9,7	1	SNP	0.4375
N2	1	IV	12034917	C	CA	sqst-1	HIGH	frameshift_variant	OTHER	TRUE	FALSE	9	2	11	9,2	1	Insertion	0.181818
N2	1	IV	12048802	C	CA	T12G3.4	HIGH	frameshift_variant	OTHER	TRUE	FALSE	10	3	13	10,3	1	Insertion	0.230769
N2	1	IV	12053506	G	GA	spt-5	HIGH	frameshift_variant	OTHER	TRUE	FALSE	92	12	104	92,12	1	Insertion	0.115385
N2	1	IV	12079470	C	G	lex-1	LOW	5_prime_UTR_premature_start_codon_gain_variant	OTHER	FALSE	FALSE	2	9	11	2,9	1	SNP	0.818182
N2	1	IV	12082948	G	GA	lex-1	HIGH	frameshift_variant	OTHER	TRUE	FALSE	74	20	94	74,20	1	Insertion	0.212766
N2	1	IV	12085664	C	CA	rbm-34	HIGH	frameshift_variant	OTHER	TRUE	FALSE	127	22	149	127,22	1	Insertion	0.147651
N2	1	IV	12086549	C	CA	rbm-34	HIGH	frameshift_variant	OTHER	TRUE	FALSE	23	8	31	23,8	1	Insertion	0.258065
N2	1	IV	12091727	C	CT	mig-32	HIGH	frameshift_variant	OTHER	TRUE	FALSE	52	8	60	52,8	1	Insertion	0.133333
N2	1	IV	12092118	C	CT	mig-32	HIGH	frameshift_variant	OTHER	TRUE	FALSE	37	5	42	37,5	1	Insertion	0.119048
N2	1	IV	12106080	G	GA	M18.3	HIGH	frameshift_variant	OTHER	TRUE	FALSE	8	6	14	8,6	1	Insertion	0.428571
N2	1	IV	12151445	C	CT	B0001.7	HIGH	frameshift_variant	OTHER	TRUE	FALSE	9	2	11	9,2	1	Insertion	0.181818
N2	1	IV	12152135	T	A	B0001.7	MODERATE	missense_variant	MISSENSE	FALSE	FALSE	15	2	17	15,2	1	SNP	0.117647
N2	1	IV	12526683	G	A	F53B2.8	HIGH	stop_gained	NONSENSE	FALSE	FALSE	16	4	20	16,4	1	SNP	0.2
N2	1	IV	12526686	G	A	F53B2.8	MODERATE	missense_variant	MISSENSE	FALSE	FALSE	16	4	20	16,4	1	SNP	0.2
N2	1	IV	12559702	A	G	ZK795.3	LOW	synonymous_variant	SILENT	FALSE	FALSE	18	2	20	18,2	1	SNP	0.1
N2	1	IV	12626502	A	G	ark-1	LOW	synonymous_variant	SILENT	FALSE	FALSE	12	5	17	12,5	1	SNP	0.294118
N2	1	IV	12627729	C	CT	ark-1	HIGH	frameshift_variant	OTHER	TRUE	FALSE	30	7	37	30,7	1	Insertion	0.189189
N2	1	IV	12630185	C	CT	ark-1	HIGH	frameshift_variant	OTHER	TRUE	FALSE	15	3	18	15,3	1	Insertion	0.166667
N2	1	IV	12648323	C	CA	vha-7	HIGH	frameshift_variant	OTHER	TRUE	FALSE	8	2	10	8,2	1	Insertion	0.2
N2	1	IV	12668420	A	AT	wdfy-3	HIGH	frameshift_variant	OTHER	TRUE	FALSE	8	2	10	8,2	1	Insertion	0.2
N2	1	IV	12694348	C	CA	T23B5.3	HIGH	frameshift_variant	OTHER	TRUE	FALSE	41	6	47	41,6	1	Insertion	0.12766
N2	1	IV	12707482	AT	A	C27D8.3	HIGH	frameshift_variant	OTHER	TRUE	FALSE	8	2	10	8,2	1	Deletion	0.2
N2	1	IV	13096055	T	TA	rfc-3	HIGH	frameshift_variant	OTHER	TRUE	FALSE	43	7	50	43,7	1	Insertion	0.14
N2	1	IV	13104245	G	GA	B0564.7	HIGH	frameshift_variant	OTHER	TRUE	FALSE	49	8	57	49,8	1	Insertion	0.140351
N2	1	IV	13106430	A	G	rde-11	MODERATE	missense_variant	MISSENSE	FALSE	FALSE	12	2	14	12,2	1	SNP	0.142857
N2	1	IV	13106437	G	A	rde-11	MODERATE	missense_variant	MISSENSE	FALSE	FALSE	13	2	15	13,2	1	SNP	0.133333
N2	1	IV	13106439	G	A	rde-11	MODERATE	missense_variant	MISSENSE	FALSE	FALSE	13	2	15	13,2	1	SNP	0.133333
N2	1	IV	13160713	G	GA	msh-5	HIGH	frameshift_variant	OTHER	TRUE	FALSE	48	11	59	48,11	1	Insertion	0.186441
N2	1	IV	13243914	C	CA	JC8.4	HIGH	frameshift_variant	OTHER	TRUE	FALSE	7	4	11	7,4	1	Insertion	0.363636
N2	1	IV	13300946	G	GA	csn-6	HIGH	frameshift_variant	OTHER	TRUE	FALSE	80	12	92	80,12	1	Insertion	0.130435
N2	1	IV	13350625	C	CT	rec-8	HIGH	frameshift_variant	OTHER	TRUE	FALSE	40	8	48	40,8	1	Insertion	0.166667
N2	1	IV	13371117	G	GA	Y62E10A.24	HIGH	frameshift_variant	OTHER	TRUE	FALSE	66	13	79	66,13	1	Insertion	0.164557
N2	1	IV	13378457	A	T	mau-8	MODERATE	missense_variant	MISSENSE	FALSE	FALSE	11	2	13	11,2	1	SNP	0.153846
N2	1	IV	13378459	C	T	mau-8	MODERATE	missense_variant	MISSENSE	FALSE	FALSE	11	2	13	11,2	1	SNP	0.153846
N2	1	IV	13781049	G	GA	gly-10	HIGH	frameshift_variant	OTHER	TRUE	FALSE	13	4	17	13,4	1	Insertion	0.235294
N2	1	IV	13792682	G	GA	Y45F10D.7	HIGH	frameshift_variant	OTHER	TRUE	FALSE	15	3	18	15,3	1	Insertion	0.166667
N2	1	IV	14424807	A	T	F55B11.3	LOW	synonymous_variant	SILENT	FALSE	FALSE	15	2	17	15,2	1	SNP	0.117647
N2	1	IV	14501923	G	GT	tag-273	HIGH	frameshift_variant	OTHER	TRUE	FALSE	15	6	21	15,6	1	Insertion	0.285714
N2	1	IV	14769762	G	GA	Y57G11C.43	HIGH	frameshift_variant	OTHER	TRUE	FALSE	13	4	17	13,4	1	Insertion	0.235294
N2	1	IV	14772618	G	A	Y57G11C.36	MODERATE	missense_variant	MISSENSE	FALSE	FALSE	14	2	16	14,2	1	SNP	0.125
N2	1	IV	15035033	C	CA	fcd-2	HIGH	frameshift_variant	OTHER	TRUE	FALSE	25	5	30	25,5	1	Insertion	0.166667
N2	1	IV	15130836	T	C	col-135	LOW	synonymous_variant	SILENT	FALSE	FALSE	16	4	20	16,4	1	SNP	0.2
N2	1	IV	15275740	C	CA	ccg-1	HIGH	frameshift_variant	OTHER	FALSE	FALSE	34	5	39	34,5	1	Insertion	0.128205
N2	1	IV	15313463	C	CA	Y73F8A.13	HIGH	frameshift_variant	OTHER	TRUE	FALSE	16	3	19	16,3	1	Insertion	0.157895
N2	1	IV	15471408	C	CT	ntl-11	HIGH	frameshift_variant	OTHER	TRUE	FALSE	11	3	14	11,3	1	Insertion	0.214286
N2	1	IV	16863949	G	GA	lsy-13	HIGH	frameshift_variant	OTHER	TRUE	FALSE	48	11	59	48,11	1	Insertion	0.186441
N2	1	IV	17081719	G	GT	snx-13	HIGH	frameshift_variant	OTHER	TRUE	FALSE	7	3	10	7,3	1	Insertion	0.3
N2	1	IV	17083691	A	AT	snx-13	HIGH	frameshift_variant	OTHER	TRUE	FALSE	40	7	47	40,7	1	Insertion	0.148936
N2	1	IV	17086913	A	G	snx-13	MODERATE	missense_variant	MISSENSE	FALSE	FALSE	18	3	21	18,3	1	SNP	0.142857
N2	1	IV	17477742	G	GA	gba-3	HIGH	frameshift_variant	OTHER	TRUE	FALSE	12	5	17	12,5	1	Insertion	0.294118
N2	1	MtDNA	11721	G	GT	nduo-5	HIGH	frameshift_variant	OTHER	FALSE	FALSE	28	9	37	28,9	1	Insertion	0.243243
N2	1	MtDNA	11850	C	CT	nduo-5	HIGH	frameshift_variant	OTHER	TRUE	FALSE	39	10	49	39,10	1	Insertion	0.204082
N2	1	V	24914	C	CA	egl-8	HIGH	frameshift_variant	OTHER	TRUE	FALSE	11	3	14	11,3	1	Insertion	0.214286
N2	1	V	118579	A	AT	cgp-1	HIGH	frameshift_variant	OTHER	TRUE	FALSE	57	14	71	57,14	1	Insertion	0.197183
N2	1	V	124634	C	CT	W03F9.1	HIGH	frameshift_variant	OTHER	TRUE	FALSE	40	8	48	40,8	1	Insertion	0.166667
N2	1	V	127285	A	AT	W03F9.2	HIGH	frameshift_variant	OTHER	TRUE	FALSE	8	3	11	8,3	1	Insertion	0.272727
N2	1	V	178954	T	TA	cul-3	HIGH	frameshift_variant	OTHER	TRUE	FALSE	64	9	73	64,9	1	Insertion	0.123288
N2	1	V	189499	T	TA	arid-1	HIGH	frameshift_variant	OTHER	TRUE	FALSE	193	24	217	193,24	1	Insertion	0.110599
N2	1	V	362967	G	GA	T22H9.1	HIGH	frameshift_variant	OTHER	TRUE	FALSE	38	8	46	38,8	1	Insertion	0.173913
N2	1	V	722853	C	CT	fbxb-72	HIGH	frameshift_variant	OTHER	TRUE	FALSE	6	4	10	6,4	1	Insertion	0.4
N2	1	V	773565	C	G	sti-1	LOW	5_prime_UTR_premature_start_codon_gain_variant	OTHER	FALSE	FALSE	10	2	12	10,2	1	SNP	0.166667
N2	1	V	993109	C	CA	unc-34	HIGH	frameshift_variant	OTHER	TRUE	FALSE	20	6	26	20,6	1	Insertion	0.230769
N2	1	V	1044437	A	G	nra-4	MODERATE	missense_variant	MISSENSE	FALSE	FALSE	13	6	19	13,6	1	SNP	0.315789
N2	1	V	1209169	G	GA	Y50D4A.1	HIGH	frameshift_variant	OTHER	TRUE	FALSE	32	8	40	32,8	1	Insertion	0.2
N2	1	V	1377935	G	GT	rga-4	HIGH	frameshift_variant	OTHER	TRUE	FALSE	65	10	75	65,10	1	Insertion	0.133333
N2	1	V	1428826	AT	A	ges-1	HIGH	frameshift_variant	OTHER	TRUE	FALSE	8	2	10	8,2	1	Deletion	0.2
N2	1	V	2700508	G	GA	nuo-5	HIGH	frameshift_variant	OTHER	TRUE	FALSE	20	4	24	20,4	1	Insertion	0.166667
N2	1	V	3587201	C	CA	T22F3.2	HIGH	frameshift_variant	OTHER	TRUE	FALSE	16	6	22	16,6	1	Insertion	0.272727
N2	1	V	3668872	G	GA	Y39H10B.2	HIGH	frameshift_variant	OTHER	TRUE	FALSE	8	3	11	8,3	1	Insertion	0.272727
N2	1	V	4167992	C	CT	Y45G5AM.7	HIGH	frameshift_variant	OTHER	TRUE	FALSE	14	3	17	14,3	1	Insertion	0.176471
N2	1	V	4187724	C	CA	nhr-114	HIGH	frameshift_variant	OTHER	TRUE	FALSE	18	6	24	18,6	1	Insertion	0.25
N2	1	V	4610880	A	AT	Y61A9LA.10	HIGH	frameshift_variant	OTHER	TRUE	FALSE	42	7	49	42,7	1	Insertion	0.142857
N2	1	V	4687257	AC	A	taf-10	HIGH	frameshift_variant	OTHER	TRUE	FALSE	8	2	10	8,2	1	Deletion	0.2
N2	1	V	4687710	G	GA	taf-10	HIGH	frameshift_variant	OTHER	TRUE	FALSE	15	4	19	15,4	1	Insertion	0.210526
N2	1	V	4689588	G	GA	K03B4.1	HIGH	frameshift_variant	OTHER	TRUE	FALSE	9	2	11	9,2	1	Insertion	0.181818
N2	1	V	4827951	G	GA	C37H5.5	HIGH	frameshift_variant	OTHER	TRUE	FALSE	59	15	74	59,15	1	Insertion	0.202703
N2	1	V	4830457	G	GA	C37H5.5	HIGH	frameshift_variant	OTHER	TRUE	FALSE	13	3	16	13,3	1	Insertion	0.1875
N2	1	V	5113568	C	CT	C04F5.8	HIGH	frameshift_variant	OTHER	TRUE	FALSE	37	8	45	37,8	1	Insertion	0.177778
N2	1	V	5269530	C	CA	B0238.11	HIGH	frameshift_variant	OTHER	TRUE	FALSE	26	5	31	26,5	1	Insertion	0.16129
N2	1	V	5504853	G	C	dnj-19	LOW	5_prime_UTR_premature_start_codon_gain_variant	OTHER	FALSE	FALSE	2	9	11	2,9	1	SNP	0.818182
N2	1	V	5659409	C	CA	mut-14	HIGH	frameshift_variant	OTHER	TRUE	FALSE	17	4	21	17,4	1	Insertion	0.190476
N2	1	V	5660318	AT	A	mut-14	HIGH	frameshift_variant	OTHER	TRUE	FALSE	11	2	13	11,2	1	Deletion	0.153846
N2	1	V	5751305	A	G	acds-10	LOW	synonymous_variant	SILENT	FALSE	FALSE	10	2	12	10,2	1	SNP	0.166667
N2	1	V	5751306	A	T	acds-10	MODERATE	missense_variant	MISSENSE	FALSE	FALSE	10	2	12	10,2	1	SNP	0.166667
N2	1	V	5917483	G	GT	C04E6.11	HIGH	frameshift_variant	OTHER	TRUE	FALSE	7	3	10	7,3	1	Insertion	0.3
N2	1	V	5940342	G	GA	M03F8.3	HIGH	frameshift_variant	OTHER	TRUE	FALSE	65	15	80	65,15	1	Insertion	0.1875
N2	1	V	5997868	G	GA	cpg-4	HIGH	frameshift_variant	OTHER	TRUE	FALSE	67	9	76	67,9	1	Insertion	0.118421
N2	1	V	6016490	G	GT	rpt-2	HIGH	frameshift_variant	OTHER	TRUE	FALSE	52	9	61	52,9	1	Insertion	0.147541
N2	1	V	6050518	G	GA	jamp-1	HIGH	frameshift_variant	OTHER	TRUE	FALSE	9	2	11	9,2	1	Insertion	0.181818
N2	1	V	6100545	G	C	crt-1	LOW	5_prime_UTR_premature_start_codon_gain_variant	OTHER	FALSE	FALSE	2	12	14	2,12	1	SNP	0.857143
N2	1	V	6146362	G	A	ttn-1	MODERATE	missense_variant	MISSENSE	FALSE	FALSE	14	2	16	14,2	1	SNP	0.125
N2	1	V	6152074	G	GT	ttn-1	HIGH	frameshift_variant	OTHER	TRUE	FALSE	17	5	22	17,5	1	Insertion	0.227273
N2	1	V	6153249	G	GT	ttn-1	HIGH	frameshift_variant	OTHER	TRUE	FALSE	12	5	17	12,5	1	Insertion	0.294118
N2	1	V	6166080	C	CT	ttn-1	HIGH	frameshift_variant	OTHER	TRUE	FALSE	14	3	17	14,3	1	Insertion	0.176471
N2	1	V	6166803	C	CT	ttn-1	HIGH	frameshift_variant	OTHER	TRUE	FALSE	15	4	19	15,4	1	Insertion	0.210526
N2	1	V	6166955	C	G	ttn-1	MODERATE	missense_variant	MISSENSE	FALSE	FALSE	12	2	14	12,2	1	SNP	0.142857
N2	1	V	6167271	G	GT	ttn-1	HIGH	frameshift_variant	OTHER	TRUE	FALSE	7	5	12	7,5	1	Insertion	0.416667
N2	1	V	6168021	G	GT	ttn-1	HIGH	frameshift_variant	OTHER	TRUE	FALSE	12	3	15	12,3	1	Insertion	0.2
N2	1	V	6173877	A	G	ttn-1	LOW	synonymous_variant	SILENT	FALSE	FALSE	14	3	17	14,3	1	SNP	0.176471
N2	1	V	6174145	T	A	ttn-1	MODERATE	missense_variant	MISSENSE	FALSE	FALSE	39	11	50	39,11	1	SNP	0.22
N2	1	V	6174160	G	C	ttn-1	MODERATE	missense_variant	MISSENSE	FALSE	FALSE	42	8	50	42,8	1	SNP	0.16
N2	1	V	6177052	A	T	ttn-1	MODERATE	missense_variant	MISSENSE	FALSE	FALSE	8	2	10	8,2	1	SNP	0.2
N2	1	V	6267107	G	GT	mrck-1	HIGH	frameshift_variant	OTHER	FALSE	FALSE	29	7	36	29,7	1	Insertion	0.194444
N2	1	V	6497422	G	GA	dgtr-1	HIGH	frameshift_variant	OTHER	TRUE	FALSE	10	4	14	10,4	1	Insertion	0.285714
N2	1	V	6784906	G	C	spn-4	LOW	5_prime_UTR_premature_start_codon_gain_variant	OTHER	FALSE	FALSE	7	8	15	7,8	1	SNP	0.533333
N2	1	V	6787463	G	A	spe-39	LOW	synonymous_variant	SILENT	FALSE	FALSE	30	10	40	30,10	1	SNP	0.25
N2	1	V	6831945	G	A	col-142	MODERATE	missense_variant	MISSENSE	FALSE	FALSE	7	3	10	7,3	1	SNP	0.3
N2	1	V	6831947	A	C	col-142	LOW	synonymous_variant	SILENT	FALSE	FALSE	8	3	11	8,3	1	SNP	0.272727
N2	1	V	7011802	T	TC	C33G8.2	HIGH	frameshift_variant	OTHER	TRUE	FALSE	12	2	14	12,2	1	Insertion	0.142857
N2	1	V	7058811	G	GT	mdt-6	HIGH	frameshift_variant	OTHER	TRUE	FALSE	187	33	220	187,33	1	Insertion	0.15
N2	1	V	7229219	C	CT	gei-6	HIGH	frameshift_variant	OTHER	TRUE	FALSE	41	6	47	41,6	1	Insertion	0.12766
N2	1	V	7410733	C	CAA	R13D7.2	HIGH	frameshift_variant	OTHER	TRUE	FALSE	8	3	11	8,3	1	Insertion	0.272727
N2	1	V	7572593	C	CT	F19F10.9	HIGH	frameshift_variant	OTHER	TRUE	FALSE	26	4	30	26,4	1	Insertion	0.133333
N2	1	V	7577326	C	T	F19F10.12	LOW	synonymous_variant	SILENT	FALSE	FALSE	9	2	11	9,2	1	SNP	0.181818
N2	1	V	7579189	C	CT	ets-6	HIGH	frameshift_variant	OTHER	TRUE	FALSE	13	4	17	13,4	1	Insertion	0.235294
N2	1	V	7580246	G	GT	ets-6	HIGH	frameshift_variant	OTHER	TRUE	FALSE	36	5	41	36,5	1	Insertion	0.121951
N2	1	V	7734358	C	CT	clic-1	HIGH	frameshift_variant	OTHER	TRUE	FALSE	122	23	145	122,23	1	Insertion	0.158621
N2	1	V	7802896	G	GT	uvs-1	HIGH	frameshift_variant	OTHER	TRUE	FALSE	24	4	28	24,4	1	Insertion	0.142857
N2	1	V	7803023	C	CT	uvs-1	HIGH	frameshift_variant	OTHER	TRUE	FALSE	28	5	33	28,5	1	Insertion	0.151515
N2	1	V	8033595	G	GA	vars-1	HIGH	frameshift_variant	OTHER	TRUE	FALSE	16	3	19	16,3	1	Insertion	0.157895
N2	1	V	8034177	C	CA	vars-1	HIGH	frameshift_variant	OTHER	TRUE	FALSE	16	5	21	16,5	1	Insertion	0.238095
N2	1	V	8182417	T	TA	srp-7	HIGH	frameshift_variant	OTHER	TRUE	FALSE	79	21	100	79,21	1	Insertion	0.21
N2	1	V	8519451	A	AT	F45F2.11	HIGH	frameshift_variant	OTHER	TRUE	FALSE	10	3	13	10,3	1	Insertion	0.230769
N2	1	V	8571372	G	GT	symk-1	HIGH	frameshift_variant	OTHER	TRUE	FALSE	16	4	20	16,4	1	Insertion	0.2
N2	1	V	8573070	C	T	symk-1	MODERATE	missense_variant	MISSENSE	FALSE	FALSE	9	2	11	9,2	1	SNP	0.181818
N2	1	V	8573074	T	G	symk-1	MODERATE	missense_variant	MISSENSE	FALSE	FALSE	10	2	12	10,2	1	SNP	0.166667
N2	1	V	8573076	T	C	symk-1	MODERATE	missense_variant	MISSENSE	FALSE	FALSE	10	2	12	10,2	1	SNP	0.166667
N2	1	V	8613857	C	CA	smk-1	HIGH	frameshift_variant	OTHER	TRUE	FALSE	32	5	37	32,5	1	Insertion	0.135135
N2	1	V	8958600	C	CA	ttc-17	HIGH	frameshift_variant	OTHER	TRUE	FALSE	40	11	51	40,11	1	Insertion	0.215686
N2	1	V	8960754	G	GA	ttc-17	HIGH	frameshift_variant	OTHER	TRUE	FALSE	29	6	35	29,6	1	Insertion	0.171429
N2	1	V	9116611	CAA	C	F21C10.7	HIGH	frameshift_variant	OTHER	TRUE	FALSE	12	2	14	12,2	1	Deletion	0.142857
N2	1	V	9346575	C	CT	K07B1.7	HIGH	frameshift_variant	OTHER	TRUE	FALSE	11	4	15	11,4	1	Insertion	0.266667
N2	1	V	9346852	C	G	K07B1.7	MODERATE	missense_variant	MISSENSE	FALSE	FALSE	8	4	12	8,4	1	SNP	0.333333
N2	1	V	9398863	G	GA	hum-2	HIGH	frameshift_variant	OTHER	TRUE	FALSE	75	11	86	75,11	1	Insertion	0.127907
N2	1	V	9497133	T	C	gsnl-1	MODERATE	missense_variant	MISSENSE	FALSE	FALSE	8	2	10	8,2	1	SNP	0.2
N2	1	V	9497135	G	A	gsnl-1	MODERATE	missense_variant	MISSENSE	FALSE	FALSE	8	2	10	8,2	1	SNP	0.2
N2	1	V	9543937	C	CT	mdf-1	HIGH	frameshift_variant	OTHER	TRUE	FALSE	73	12	85	73,12	1	Insertion	0.141176
N2	1	V	9581349	G	GT	rtfo-1	HIGH	frameshift_variant	OTHER	TRUE	FALSE	193	24	217	193,24	1	Insertion	0.110599
N2	1	V	9733270	G	GA	drap-1	HIGH	frameshift_variant	OTHER	TRUE	FALSE	79	12	91	79,12	1	Insertion	0.131868
N2	1	V	9776783	C	CT	smg-4	HIGH	frameshift_variant	OTHER	TRUE	FALSE	13	3	16	13,3	1	Insertion	0.1875
N2	1	V	10202095	T	G	ZK856.7	LOW	5_prime_UTR_premature_start_codon_gain_variant	OTHER	FALSE	FALSE	4	8	12	4,8	1	SNP	0.666667
N2	1	V	10250586	C	CA	akt-1	HIGH	frameshift_variant	OTHER	TRUE	FALSE	25	7	32	25,7	1	Insertion	0.21875
N2	1	V	10277901	C	G	lys-1	LOW	5_prime_UTR_premature_start_codon_gain_variant	OTHER	FALSE	FALSE	5	11	16	5,11	1	SNP	0.6875
N2	1	V	10316786	C	CT	asps-1	HIGH	frameshift_variant	OTHER	TRUE	FALSE	32	6	38	32,6	1	Insertion	0.157895
N2	1	V	10391361	C	CA	AC3.5	HIGH	frameshift_variant	OTHER	TRUE	FALSE	9	3	12	9,3	1	Insertion	0.25
N2	1	V	10425962	C	CT	apc-10	HIGH	frameshift_variant	OTHER	TRUE	FALSE	34	5	39	34,5	1	Insertion	0.128205
N2	1	V	10443086	C	CA	pap-1	HIGH	frameshift_variant	OTHER	TRUE	FALSE	9	2	11	9,2	1	Insertion	0.181818
N2	1	V	10444870	C	CA	pap-1	HIGH	frameshift_variant	OTHER	TRUE	FALSE	20	5	25	20,5	1	Insertion	0.2
N2	1	V	10568862	C	CT	vps-54	HIGH	frameshift_variant	OTHER	TRUE	FALSE	17	4	21	17,4	1	Insertion	0.190476
N2	1	V	10568904	G	GT	vps-54	HIGH	frameshift_variant	OTHER	TRUE	FALSE	17	3	20	17,3	1	Insertion	0.15
N2	1	V	10578038	G	GT	mics-1	HIGH	frameshift_variant	OTHER	TRUE	FALSE	37	7	44	37,7	1	Insertion	0.159091
N2	1	V	10770365	C	G	pas-2	LOW	5_prime_UTR_premature_start_codon_gain_variant	OTHER	FALSE	FALSE	4	8	12	4,8	1	SNP	0.666667
N2	1	V	10807760	C	CT	plrg-1	HIGH	frameshift_variant	OTHER	TRUE	FALSE	61	10	71	61,10	1	Insertion	0.140845
N2	1	V	10960038	A	AT	vps-36	HIGH	frameshift_variant	OTHER	TRUE	FALSE	15	4	19	15,4	1	Insertion	0.210526
N2	1	V	11046349	A	AT	dhs-18	HIGH	frameshift_variant	OTHER	TRUE	FALSE	11	3	14	11,3	1	Insertion	0.214286
N2	1	V	11072290	T	C	act-3	LOW	synonymous_variant	SILENT	FALSE	FALSE	18	3	21	18,3	1	SNP	0.142857
N2	1	V	11072527	G	A	act-3	LOW	synonymous_variant	SILENT	FALSE	FALSE	8	2	10	8,2	1	SNP	0.2
N2	1	V	11116016	G	GA	math-33	HIGH	frameshift_variant	OTHER	TRUE	FALSE	64	8	72	64,8	1	Insertion	0.111111
N2	1	V	11239702	C	G	ima-1	LOW	5_prime_UTR_premature_start_codon_gain_variant	OTHER	FALSE	FALSE	14	7	21	14,7	1	SNP	0.333333
N2	1	V	11243636	A	AT	T19B10.8	HIGH	frameshift_variant	OTHER	TRUE	FALSE	25	4	29	25,4	1	Insertion	0.137931
N2	1	V	11569242	C	CT	pms-2	HIGH	frameshift_variant	OTHER	TRUE	FALSE	33	7	40	33,7	1	Insertion	0.175
N2	1	V	11751336	G	GA	T04F3.1	HIGH	frameshift_variant	OTHER	TRUE	FALSE	41	6	47	41,6	1	Insertion	0.12766
N2	1	V	11911844	C	G	sma-1	MODERATE	missense_variant	MISSENSE	FALSE	FALSE	10	2	12	10,2	1	SNP	0.166667
N2	1	V	11911852	G	A	sma-1	LOW	synonymous_variant	SILENT	FALSE	FALSE	9	2	11	9,2	1	SNP	0.181818
N2	1	V	11928839	G	GT	aman-2	HIGH	frameshift_variant	OTHER	TRUE	FALSE	13	5	18	13,5	1	Insertion	0.277778
N2	1	V	11930361	G	GT	aman-2	HIGH	frameshift_variant	OTHER	TRUE	FALSE	12	3	15	12,3	1	Insertion	0.2
N2	1	V	12017131	C	CT	pkc-1	HIGH	frameshift_variant	OTHER	TRUE	FALSE	32	9	41	32,9	1	Insertion	0.219512
N2	1	V	12017180	C	CT	pkc-1	HIGH	frameshift_variant	OTHER	TRUE	FALSE	17	4	21	17,4	1	Insertion	0.190476
N2	1	V	12059271	A	G	R07B7.2	LOW	synonymous_variant	SILENT	FALSE	FALSE	40	14	54	40,14	1	SNP	0.259259
N2	1	V	12061820	CT	C	clh-6	HIGH	frameshift_variant	OTHER	TRUE	FALSE	20	3	23	20,3	1	Deletion	0.130435
N2	1	V	12192633	C	CA	rnp-1	HIGH	frameshift_variant	OTHER	TRUE	FALSE	54	8	62	54,8	1	Insertion	0.129032
N2	1	V	12202084	T	TA	ogdh-2	HIGH	frameshift_variant	OTHER	TRUE	FALSE	38	14	52	38,14	1	Insertion	0.269231
N2	1	V	12233009	C	CT	myo-3	HIGH	frameshift_variant	OTHER	FALSE	FALSE	23	4	27	23,4	1	Insertion	0.148148
N2	1	V	12272421	G	GA	capg-2	HIGH	frameshift_variant	OTHER	TRUE	FALSE	44	8	52	44,8	1	Insertion	0.153846
N2	1	V	12287552	G	GT	rskd-1	HIGH	frameshift_variant	OTHER	TRUE	FALSE	16	10	26	16,10	1	Insertion	0.384615
N2	1	V	12503269	T	TA	rbm-25	HIGH	frameshift_variant	OTHER	TRUE	FALSE	28	5	33	28,5	1	Insertion	0.151515
N2	1	V	12514045	T	TA	T28H10.3	HIGH	frameshift_variant	OTHER	TRUE	FALSE	39	9	48	39,9	1	Insertion	0.1875
N2	1	V	12598028	T	G	ril-2	MODERATE	missense_variant	MISSENSE	FALSE	FALSE	10	2	12	10,2	1	SNP	0.166667
N2	1	V	12600716	T	TA	C14C10.5	HIGH	frameshift_variant	OTHER	TRUE	FALSE	73	9	82	73,9	1	Insertion	0.109756
N2	1	V	12600869	T	TA	C14C10.5	HIGH	frameshift_variant	OTHER	TRUE	FALSE	44	10	54	44,10	1	Insertion	0.185185
N2	1	V	12761942	A	G	abcf-1	MODERATE	missense_variant	MISSENSE	FALSE	FALSE	8	2	10	8,2	1	SNP	0.2
N2	1	V	12761967	G	T	abcf-1	LOW	synonymous_variant	SILENT	FALSE	FALSE	11	2	13	11,2	1	SNP	0.153846
N2	1	V	12762772	G	GT	abcf-1	HIGH	frameshift_variant	OTHER	TRUE	FALSE	73	10	83	73,10	1	Insertion	0.120482
N2	1	V	12767260	C	CA	scc-3	HIGH	frameshift_variant	OTHER	TRUE	FALSE	37	6	43	37,6	1	Insertion	0.139535
N2	1	V	13179066	T	TA	him-17	HIGH	frameshift_variant	OTHER	TRUE	FALSE	10	5	15	10,5	1	Insertion	0.333333
N2	1	V	13198467	A	G	col-159	LOW	synonymous_variant	SILENT	FALSE	FALSE	62	8	70	62,8	1	SNP	0.114286
N2	1	V	13198480	C	G	col-159	MODERATE	missense_variant	MISSENSE	FALSE	FALSE	59	8	67	59,8	1	SNP	0.119403
N2	1	V	13198854	G	A	col-159	LOW	synonymous_variant	SILENT	FALSE	FALSE	45	6	51	45,6	1	SNP	0.117647
N2	1	V	13198860	A	G	col-159	LOW	synonymous_variant	SILENT	FALSE	FALSE	43	6	49	43,6	1	SNP	0.122449
N2	1	V	13492142	C	CT	eea-1	HIGH	frameshift_variant	OTHER	TRUE	FALSE	51	9	60	51,9	1	Insertion	0.15
N2	1	V	13495251	G	GT	eea-1	HIGH	frameshift_variant	OTHER	TRUE	FALSE	46	10	56	46,10	1	Insertion	0.178571
N2	1	V	13552621	C	CA	C56A3.5	HIGH	frameshift_variant	OTHER	TRUE	FALSE	23	6	29	23,6	1	Insertion	0.206897
N2	1	V	13569483	C	CA	bir-2	HIGH	frameshift_variant	OTHER	TRUE	FALSE	16	3	19	16,3	1	Insertion	0.157895
N2	1	V	13653699	C	CA	lpin-1	HIGH	frameshift_variant	OTHER	TRUE	FALSE	73	11	84	73,11	1	Insertion	0.130952
N2	1	V	13668732	G	GA	rde-12	HIGH	frameshift_variant	OTHER	FALSE	FALSE	18	4	22	18,4	1	Insertion	0.181818
N2	1	V	13719996	G	A	T01D3.6	MODERATE	missense_variant	MISSENSE	FALSE	FALSE	9	2	11	9,2	1	SNP	0.181818
N2	1	V	13719999	C	T	T01D3.6	MODERATE	missense_variant	MISSENSE	FALSE	FALSE	9	2	11	9,2	1	SNP	0.181818
N2	1	V	13785477	A	AT	F53C11.4	HIGH	frameshift_variant	OTHER	TRUE	FALSE	31	5	36	31,5	1	Insertion	0.138889
N2	1	V	14293698	G	A	F14D7.2	LOW	synonymous_variant	SILENT	FALSE	FALSE	8	2	10	8,2	1	SNP	0.2
N2	1	V	14293700	T	G	F14D7.2	MODERATE	missense_variant	MISSENSE	FALSE	FALSE	8	2	10	8,2	1	SNP	0.2
N2	1	V	14545360	C	CT	C53A5.6	HIGH	frameshift_variant	OTHER	TRUE	FALSE	36	8	44	36,8	1	Insertion	0.181818
N2	1	V	14645233	C	CT	rfc-1	HIGH	frameshift_variant	OTHER	TRUE	FALSE	35	5	40	35,5	1	Insertion	0.125
N2	1	V	14988148	G	GT	cdt-2	HIGH	frameshift_variant	OTHER	TRUE	FALSE	31	9	40	31,9	1	Insertion	0.225
N2	1	V	14990401	C	CA	cdt-2	HIGH	frameshift_variant	OTHER	TRUE	FALSE	26	12	38	26,12	1	Insertion	0.315789
N2	1	V	15145793	C	CA	K08F9.4	HIGH	frameshift_variant	OTHER	TRUE	FALSE	17	4	21	17,4	1	Insertion	0.190476
N2	1	V	15187381	A	C	cyn-7	LOW	5_prime_UTR_premature_start_codon_gain_variant	OTHER	FALSE	FALSE	7	15	22	7,15	1	SNP	0.681818
N2	1	V	15395702	C	G	cyb-3	LOW	5_prime_UTR_premature_start_codon_gain_variant	OTHER	FALSE	FALSE	21	13	34	21,13	1	SNP	0.382353
N2	1	V	15653285	GA	G	F53E4.1	HIGH	frameshift_variant	OTHER	TRUE	FALSE	11	2	13	11,2	1	Deletion	0.153846
N2	1	V	15656638	C	CT	F53E4.1	HIGH	frameshift_variant	OTHER	TRUE	FALSE	55	14	69	55,14	1	Insertion	0.202899
N2	1	V	16231325	G	GT	gst-22	HIGH	frameshift_variant	OTHER	TRUE	FALSE	8	2	10	8,2	1	Insertion	0.2
N2	1	V	16538633	C	CA	Y32B12B.2	HIGH	frameshift_variant	OTHER	TRUE	FALSE	23	5	28	23,5	1	Insertion	0.178571
N2	1	V	16554018	G	GA	Y32B12B.4	HIGH	frameshift_variant	OTHER	TRUE	FALSE	62	8	70	62,8	1	Insertion	0.114286
N2	1	V	16790403	C	CA	immt-2	HIGH	frameshift_variant	OTHER	TRUE	FALSE	38	7	45	38,7	1	Insertion	0.155556
N2	1	V	17854950	A	AT	tcc-1	HIGH	frameshift_variant	OTHER	TRUE	FALSE	73	13	86	73,13	1	Insertion	0.151163
N2	1	V	18022525	C	CA	prp-6	HIGH	frameshift_variant	OTHER	FALSE	FALSE	17	7	24	17,7	1	Insertion	0.291667
N2	1	V	18158308	C	CA	clec-48	HIGH	frameshift_variant	OTHER	TRUE	FALSE	15	3	18	15,3	1	Insertion	0.166667
N2	1	V	18879502	C	CT	emb-4	HIGH	frameshift_variant	OTHER	TRUE	FALSE	25	6	31	25,6	1	Insertion	0.193548
N2	1	V	18893600	G	GT	emb-4	HIGH	frameshift_variant	OTHER	TRUE	FALSE	86	11	97	86,11	1	Insertion	0.113402
N2	1	V	18995127	C	CA	gtf-2F2	HIGH	frameshift_variant	OTHER	TRUE	FALSE	54	8	62	54,8	1	Insertion	0.129032
N2	1	V	19696798	CTT	C	Y43F8C.13	HIGH	frameshift_variant	OTHER	TRUE	FALSE	13	2	15	13,2	1	Deletion	0.133333
N2	1	V	19699282	C	CA	ani-3	HIGH	frameshift_variant	OTHER	TRUE	FALSE	13	3	16	13,3	1	Insertion	0.1875
N2	1	V	19888357	TC	T	gly-4	HIGH	frameshift_variant	OTHER	TRUE	FALSE	10	2	12	10,2	1	Deletion	0.166667
N2	1	V	19888367	A	G	gly-4	MODERATE	missense_variant	MISSENSE	FALSE	FALSE	10	2	12	10,2	1	SNP	0.166667
N2	1	V	20117169	G	GT	ncx-1	HIGH	frameshift_variant	OTHER	TRUE	FALSE	7	3	10	7,3	1	Insertion	0.3
N2	1	V	20163006	A	AT	F19B2.5	HIGH	frameshift_variant	OTHER	TRUE	FALSE	65	12	77	65,12	1	Insertion	0.155844
N2	1	V	20845337	C	CT	F31D4.2	HIGH	frameshift_variant	OTHER	TRUE	FALSE	20	4	24	20,4	1	Insertion	0.166667
N2	1	V	20846155	C	G	fkb-6	LOW	5_prime_UTR_premature_start_codon_gain_variant	OTHER	FALSE	FALSE	6	14	20	6,14	1	SNP	0.7
N2	1	X	304534	C	CA	gcp-2.1	HIGH	frameshift_variant	OTHER	TRUE	FALSE	9	4	13	9,4	1	Insertion	0.307692
N2	1	X	866697	CT	C	lgl-1	HIGH	frameshift_variant	OTHER	TRUE	FALSE	8	2	10	8,2	1	Deletion	0.2
N2	1	X	873072	GT	G	F56F10.1	HIGH	frameshift_variant	OTHER	TRUE	FALSE	9	2	11	9,2	1	Deletion	0.181818
N2	1	X	2531395	A	G	R11B5.t2	LOW	stop_retained_variant	OTHER	FALSE	FALSE	9	2	11	9,2	1	SNP	0.181818
N2	1	X	2696563	G	GA	T02C5.1	HIGH	frameshift_variant	OTHER	TRUE	FALSE	20	14	34	20,14	1	Insertion	0.411765
N2	1	X	3261041	G	GA	lbp-2	HIGH	frameshift_variant	OTHER	TRUE	FALSE	566	78	644	566,78	1	Insertion	0.121118
N2	1	X	3443974	G	GA	ZK813.2	HIGH	frameshift_variant	OTHER	TRUE	FALSE	42	8	50	42,8	1	Insertion	0.16
N2	1	X	3560621	A	G	vit-4	LOW	synonymous_variant	SILENT	FALSE	FALSE	15	2	17	15,2	1	SNP	0.117647
N2	1	X	3560624	A	G	vit-4	LOW	synonymous_variant	SILENT	FALSE	FALSE	15	2	17	15,2	1	SNP	0.117647
N2	1	X	3560627	A	G	vit-4	LOW	synonymous_variant	SILENT	FALSE	FALSE	14	2	16	14,2	1	SNP	0.125
N2	1	X	3561356	G	T	vit-4	LOW	synonymous_variant	SILENT	FALSE	FALSE	18	9	27	18,9	1	SNP	0.333333
N2	1	X	3561484	C	G	vit-4	MODERATE	missense_variant	MISSENSE	FALSE	FALSE	7	3	10	7,3	1	SNP	0.3
N2	1	X	3561486	T	G	vit-4	MODERATE	missense_variant	MISSENSE	FALSE	FALSE	7	3	10	7,3	1	SNP	0.3
N2	1	X	3561629	C	T	vit-4	LOW	synonymous_variant	SILENT	FALSE	FALSE	12	2	14	12,2	1	SNP	0.142857
N2	1	X	3568666	G	A	vit-3	LOW	synonymous_variant	SILENT	FALSE	FALSE	133	15	148	133,15	1	SNP	0.101351
N2	1	X	3568677	C	T	vit-3	MODERATE	missense_variant	MISSENSE	FALSE	FALSE	118	15	133	118,15	1	SNP	0.112782
N2	1	X	3569383	C	T	vit-3	LOW	synonymous_variant	SILENT	FALSE	FALSE	57	9	66	57,9	1	SNP	0.136364
N2	1	X	3569393	A	T	vit-3	MODERATE	missense_variant	MISSENSE	FALSE	FALSE	50	6	56	50,6	1	SNP	0.107143
N2	1	X	3569920	G	T	vit-3	LOW	synonymous_variant	SILENT	FALSE	FALSE	78	11	89	78,11	1	SNP	0.123596
N2	1	X	3570560	G	T	vit-3	MODERATE	missense_variant	MISSENSE	FALSE	FALSE	10	2	12	10,2	1	SNP	0.166667
N2	1	X	3570568	A	G	vit-3	LOW	synonymous_variant	SILENT	FALSE	FALSE	10	3	13	10,3	1	SNP	0.230769
N2	1	X	3570712	A	G	vit-3	LOW	synonymous_variant	SILENT	FALSE	FALSE	22	6	28	22,6	1	SNP	0.214286
N2	1	X	3571237	C	G	vit-3	LOW	synonymous_variant	SILENT	FALSE	FALSE	181	29	210	181,29	1	SNP	0.138095
N2	1	X	3671232	C	CT	C02F12.5	HIGH	frameshift_variant	OTHER	TRUE	FALSE	7	3	10	7,3	1	Insertion	0.3
N2	1	X	3805429	A	C	F35A5.2	LOW	synonymous_variant	SILENT	FALSE	FALSE	10	2	12	10,2	1	SNP	0.166667
N2	1	X	3805430	T	G	F35A5.2	MODERATE	missense_variant	MISSENSE	FALSE	FALSE	10	2	12	10,2	1	SNP	0.166667
N2	1	X	3812118	T	A	F35A5.1	LOW	synonymous_variant	SILENT	FALSE	FALSE	2	15	17	2,15	1	SNP	0.882353
N2	1	X	3812218	A	G	F35A5.1	MODERATE	missense_variant	MISSENSE	FALSE	FALSE	12	6	18	12,6	1	SNP	0.333333
N2	1	X	3812343	G	T	F35A5.1	LOW	synonymous_variant	SILENT	FALSE	FALSE	12	3	15	12,3	1	SNP	0.2
N2	1	X	3812358	G	A	F35A5.1	LOW	synonymous_variant	SILENT	FALSE	FALSE	12	2	14	12,2	1	SNP	0.142857
N2	1	X	3812361	A	T	F35A5.1	LOW	synonymous_variant	SILENT	FALSE	FALSE	12	2	14	12,2	1	SNP	0.142857
N2	1	X	3812364	A	T	F35A5.1	LOW	synonymous_variant	SILENT	FALSE	FALSE	12	2	14	12,2	1	SNP	0.142857
N2	1	X	3812373	A	G	F35A5.1	LOW	synonymous_variant	SILENT	FALSE	FALSE	11	2	13	11,2	1	SNP	0.153846
N2	1	X	3813455	C	CA	F35A5.1	HIGH	frameshift_variant	OTHER	TRUE	FALSE	12	2	14	12,2	1	Insertion	0.142857
N2	1	X	3813459	G	A	F35A5.1	LOW	synonymous_variant	SILENT	FALSE	FALSE	12	2	14	12,2	1	SNP	0.142857
N2	1	X	4298173	C	CT	pqn-15	HIGH	frameshift_variant	OTHER	FALSE	FALSE	14	5	19	14,5	1	Insertion	0.263158
N2	1	X	4298673	G	GT	pqn-15	HIGH	frameshift_variant	OTHER	TRUE	FALSE	9	4	13	9,4	1	Insertion	0.307692
N2	1	X	4602813	C	CT	spat-3	HIGH	frameshift_variant	OTHER	TRUE	FALSE	83	13	96	83,13	1	Insertion	0.135417
N2	1	X	4603103	G	GA	spat-3	HIGH	frameshift_variant	OTHER	TRUE	FALSE	23	5	28	23,5	1	Insertion	0.178571
N2	1	X	4603774	C	CT	spat-3	HIGH	frameshift_variant	OTHER	TRUE	FALSE	12	4	16	12,4	1	Insertion	0.25
N2	1	X	4605554	C	CT	spat-3	HIGH	frameshift_variant	OTHER	FALSE	FALSE	9	3	12	9,3	1	Insertion	0.25
N2	1	X	4697888	C	CA	hyl-2	HIGH	frameshift_variant	OTHER	TRUE	FALSE	9	2	11	9,2	1	Insertion	0.181818
N2	1	X	4842661	C	CT	F39C12.1	HIGH	frameshift_variant	OTHER	TRUE	FALSE	13	3	16	13,3	1	Insertion	0.1875
N2	1	X	4847558	GA	G	F39C12.1	HIGH	frameshift_variant	OTHER	TRUE	FALSE	13	2	15	13,2	1	Deletion	0.133333
N2	1	X	4849246	G	GT	F39C12.1	HIGH	frameshift_variant	OTHER	TRUE	FALSE	13	4	17	13,4	1	Insertion	0.235294
N2	1	X	5114975	G	GT	apl-1	HIGH	frameshift_variant	OTHER	TRUE	FALSE	85	10	95	85,10	1	Insertion	0.105263
N2	1	X	5762283	G	GT	tag-294	HIGH	frameshift_variant	OTHER	TRUE	FALSE	23	5	28	23,5	1	Insertion	0.178571
N2	1	X	5940589	C	A	acs-17	MODERATE	missense_variant	MISSENSE	FALSE	FALSE	10	2	12	10,2	1	SNP	0.166667
N2	1	X	5940605	C	T	acs-17	MODERATE	missense_variant	MISSENSE	FALSE	FALSE	8	2	10	8,2	1	SNP	0.2
N2	1	X	6104364	T	C	C15H9.4	LOW	synonymous_variant	SILENT	FALSE	FALSE	9	2	11	9,2	1	SNP	0.181818
N2	1	X	6104371	A	G	C15H9.4	MODERATE	missense_variant	MISSENSE	FALSE	FALSE	9	2	11	9,2	1	SNP	0.181818
N2	1	X	6336249	TA	T	C03B1.13	HIGH	frameshift_variant	OTHER	TRUE	FALSE	9	2	11	9,2	1	Deletion	0.181818
N2	1	X	6500360	C	CT	cdf-1	HIGH	frameshift_variant	OTHER	FALSE	FALSE	9	4	13	9,4	1	Insertion	0.307692
N2	1	X	6786754	C	T	bgal-2	MODERATE	missense_variant	MISSENSE	FALSE	FALSE	8	2	10	8,2	1	SNP	0.2
N2	1	X	6811920	G	GA	atg-2	HIGH	frameshift_variant	OTHER	TRUE	FALSE	9	5	14	9,5	1	Insertion	0.357143
N2	1	X	6812016	G	GA	atg-2	HIGH	frameshift_variant	OTHER	TRUE	FALSE	33	4	37	33,4	1	Insertion	0.108108
N2	1	X	6859476	C	G	rig-3	MODERATE	missense_variant	MISSENSE	FALSE	FALSE	8	2	10	8,2	1	SNP	0.2
N2	1	X	6859477	G	A	rig-3	MODERATE	missense_variant	MISSENSE	FALSE	FALSE	8	2	10	8,2	1	SNP	0.2
N2	1	X	7200475	A	G	C55B6.1	MODERATE	missense_variant	MISSENSE	FALSE	FALSE	10	2	12	10,2	1	SNP	0.166667
N2	1	X	7200476	A	T	C55B6.1	MODERATE	missense_variant	MISSENSE	FALSE	FALSE	10	2	12	10,2	1	SNP	0.166667
N2	1	X	7250928	C	CA	F46H5.4	HIGH	frameshift_variant	OTHER	TRUE	FALSE	8	2	10	8,2	1	Insertion	0.2
N2	1	X	7292242	C	CA	lron-7	HIGH	frameshift_variant	OTHER	TRUE	FALSE	71	10	81	71,10	1	Insertion	0.123457
N2	1	X	7292434	G	GA	lron-7	HIGH	frameshift_variant	OTHER	TRUE	FALSE	57	9	66	57,9	1	Insertion	0.136364
N2	1	X	7494583	T	G	F48E3.4	MODERATE	missense_variant	MISSENSE	FALSE	FALSE	53	19	72	53,19	1	SNP	0.263889
N2	1	X	7684746	C	CA	unc-18	HIGH	frameshift_variant	OTHER	TRUE	FALSE	9	2	11	9,2	1	Insertion	0.181818
N2	1	X	7725976	T	G	spp-14	LOW	5_prime_UTR_premature_start_codon_gain_variant	OTHER	FALSE	FALSE	2	12	14	2,12	1	SNP	0.857143
N2	1	X	7784863	A	AT	ZK154.5	HIGH	frameshift_variant	OTHER	TRUE	FALSE	13	3	16	13,3	1	Insertion	0.1875
N2	1	X	8086086	C	CT	dao-3	HIGH	frameshift_variant	OTHER	TRUE	FALSE	28	4	32	28,4	1	Insertion	0.125
N2	1	X	8735036	G	GT	M02D8.3	HIGH	frameshift_variant	OTHER	TRUE	FALSE	18	4	22	18,4	1	Insertion	0.181818
N2	1	X	8736402	A	C	M02D8.3	MODERATE	missense_variant	MISSENSE	FALSE	FALSE	9	2	11	9,2	1	SNP	0.181818
N2	1	X	8736406	T	A	M02D8.3	LOW	synonymous_variant	SILENT	FALSE	FALSE	10	2	12	10,2	1	SNP	0.166667
N2	1	X	8736407	G	A	M02D8.3	MODERATE	missense_variant	MISSENSE	FALSE	FALSE	9	2	11	9,2	1	SNP	0.181818
N2	1	X	8736409	C	CCAA	M02D8.3	MODERATE	disruptive_inframe_insertion	OTHER	FALSE	FALSE	8	2	10	8,2	1	Insertion	0.2
N2	1	X	8925684	C	T	D1009.t1	MODERATE	missense_variant	MISSENSE	FALSE	FALSE	12	2	14	12,2	1	SNP	0.142857
N2	1	X	8925685	G	A	D1009.t1	LOW	synonymous_variant	SILENT	FALSE	FALSE	8	4	12	8,4	1	SNP	0.333333
N2	1	X	9310783	AAT	A	H29C22.1	HIGH	frameshift_variant	OTHER	TRUE	FALSE	11	2	13	11,2	1	Deletion	0.153846
N2	1	X	9513826	C	CA	gap-2	HIGH	frameshift_variant	OTHER	TRUE	FALSE	25	4	29	25,4	1	Insertion	0.137931
N2	1	X	9722607	A	G	him-4	LOW	synonymous_variant	SILENT	FALSE	FALSE	16	2	18	16,2	1	SNP	0.111111
N2	1	X	9722616	T	C	him-4	LOW	synonymous_variant	SILENT	FALSE	FALSE	16	2	18	16,2	1	SNP	0.111111
N2	1	X	9816649	C	CT	dpy-22	HIGH	frameshift_variant	OTHER	TRUE	FALSE	8	2	10	8,2	1	Insertion	0.2
N2	1	X	9860628	C	CA	scav-5	HIGH	frameshift_variant	OTHER	TRUE	FALSE	23	5	28	23,5	1	Insertion	0.178571
N2	1	X	9885761	G	GA	mrp-4	HIGH	frameshift_variant	OTHER	TRUE	FALSE	60	9	69	60,9	1	Insertion	0.130435
N2	1	X	10324483	C	CT	acl-5	HIGH	frameshift_variant	OTHER	TRUE	FALSE	20	5	25	20,5	1	Insertion	0.2
N2	1	X	10554119	C	T	syd-2	MODERATE	missense_variant	MISSENSE	FALSE	FALSE	12	4	16	12,4	1	SNP	0.25
N2	1	X	10575147	C	G	bet-2	MODERATE	missense_variant	MISSENSE	FALSE	FALSE	8	3	11	8,3	1	SNP	0.272727
N2	1	X	10993597	T	TA	ver-3	HIGH	frameshift_variant	OTHER	TRUE	FALSE	26	4	30	26,4	1	Insertion	0.133333
N2	1	X	11202406	T	C	col-179	LOW	synonymous_variant	SILENT	FALSE	FALSE	81	18	99	81,18	1	SNP	0.181818
N2	1	X	11202418	T	A	col-179	LOW	synonymous_variant	SILENT	FALSE	FALSE	74	18	92	74,18	1	SNP	0.195652
N2	1	X	11371128	G	GA	ttyh-1	HIGH	frameshift_variant	OTHER	TRUE	FALSE	8	2	10	8,2	1	Insertion	0.2
N2	1	X	11411908	C	CT	pek-1	HIGH	frameshift_variant	OTHER	TRUE	FALSE	19	4	23	19,4	1	Insertion	0.173913
N2	1	X	11414039	A	AT	pek-1	HIGH	frameshift_variant	OTHER	TRUE	FALSE	11	3	14	11,3	1	Insertion	0.214286
N2	1	X	11513412	G	A	hpo-34	HIGH	stop_gained	NONSENSE	FALSE	FALSE	10	2	12	10,2	1	SNP	0.166667
N2	1	X	11516287	CT	C	hpo-34	HIGH	frameshift_variant	OTHER	TRUE	FALSE	9	2	11	9,2	1	Deletion	0.181818
N2	1	X	11529979	T	TA	sdc-2	HIGH	frameshift_variant	OTHER	TRUE	FALSE	20	7	27	20,7	1	Insertion	0.259259
N2	1	X	11605415	G	C	ftt-2	LOW	5_prime_UTR_premature_start_codon_gain_variant	OTHER	FALSE	FALSE	9	6	15	9,6	1	SNP	0.4
N2	1	X	11726547	CG	C	gst-42	HIGH	frameshift_variant	OTHER	TRUE	FALSE	10	2	12	10,2	1	Deletion	0.166667
N2	1	X	11882371	A	AT	Y62H9A.5	HIGH	frameshift_variant	OTHER	TRUE	FALSE	47	6	53	47,6	1	Insertion	0.113208
N2	1	X	12472480	G	A	myo-2	LOW	synonymous_variant	SILENT	FALSE	FALSE	10	2	12	10,2	1	SNP	0.166667
N2	1	X	12472481	A	G	myo-2	MODERATE	missense_variant	MISSENSE	FALSE	FALSE	10	2	12	10,2	1	SNP	0.166667
N2	1	X	12474515	T	C	myo-2	MODERATE	missense_variant	MISSENSE	FALSE	FALSE	9	4	13	9,4	1	SNP	0.307692
N2	1	X	12620882	CACTATCT	C	R09A8.2	HIGH	frameshift_variant	OTHER	TRUE	FALSE	12	2	14	12,2	1	Deletion	0.142857
N2	1	X	12623171	C	CA	R09A8.2	HIGH	frameshift_variant	OTHER	FALSE	FALSE	6	4	10	6,4	1	Insertion	0.4
N2	1	X	12847889	C	CT	chd-3	HIGH	frameshift_variant	OTHER	TRUE	FALSE	7	3	10	7,3	1	Insertion	0.3
N2	1	X	13154696	CT	C	mob-2	HIGH	frameshift_variant	OTHER	TRUE	FALSE	12	2	14	12,2	1	Deletion	0.142857
N2	1	X	13430725	C	CT	C29F7.10	HIGH	frameshift_variant	OTHER	TRUE	FALSE	20	5	25	20,5	1	Insertion	0.2
N2	1	X	14296136	A	AT	madd-3	HIGH	frameshift_variant	OTHER	TRUE	FALSE	8	3	11	8,3	1	Insertion	0.272727
N2	1	X	14820892	C	A	mbk-1	LOW	synonymous_variant	SILENT	FALSE	FALSE	9	2	11	9,2	1	SNP	0.181818
N2	1	X	14820893	G	A	mbk-1	MODERATE	missense_variant	MISSENSE	FALSE	FALSE	9	2	11	9,2	1	SNP	0.181818
N2	1	X	15272914	C	T	kin-20	MODERATE	missense_variant	MISSENSE	FALSE	FALSE	11	3	14	11,3	1	SNP	0.214286
N2	1	X	15728417	G	GA	lin-15B	HIGH	frameshift_variant	OTHER	TRUE	FALSE	9	2	11	9,2	1	Insertion	0.181818
N2	1	X	15924397	A	T	F31B9.3	HIGH	stop_gained	NONSENSE	FALSE	FALSE	9	2	11	9,2	1	SNP	0.181818
N2	1	X	15924398	A	T	F31B9.3	MODERATE	missense_variant	MISSENSE	FALSE	FALSE	9	2	11	9,2	1	SNP	0.181818
N2	1	X	16277082	T	A	sdc-1	MODERATE	missense_variant	MISSENSE	FALSE	FALSE	13	2	15	13,2	1	SNP	0.133333
N2	1	X	16608177	C	CT	F59C12.3	HIGH	frameshift_variant	OTHER	TRUE	FALSE	11	4	15	11,4	1	Insertion	0.266667
N2	1	X	16615459	G	A	ain-1	LOW	synonymous_variant	SILENT	FALSE	FALSE	10	5	15	10,5	1	SNP	0.333333
N2	1	X	16677726	G	C	F22H10.3	LOW	5_prime_UTR_premature_start_codon_gain_variant	OTHER	FALSE	FALSE	7	4	11	7,4	1	SNP	0.363636
N2	1	X	16969929	C	CA	F52G3.1	HIGH	frameshift_variant	OTHER	TRUE	FALSE	33	5	38	33,5	1	Insertion	0.131579
N2	2	I	24791	C	CT	rcor-1	HIGH	frameshift_variant	OTHER	TRUE	FALSE	14	4	18	14,4	1	Insertion	0.222222
N2	2	I	88449	C	CA	Y48G1C.10	HIGH	frameshift_variant	OTHER	TRUE	FALSE	16	4	20	16,4	1	Insertion	0.2
N2	2	I	97827	C	CT	Y48G1C.8	HIGH	frameshift_variant	OTHER	TRUE	FALSE	82	24	106	82,24	1	Insertion	0.226415
N2	2	I	190965	C	T	atm-1	MODERATE	missense_variant	MISSENSE	FALSE	FALSE	11	2	13	11,2	1	SNP	0.153846
N2	2	I	190967	G	A	atm-1	MODERATE	missense_variant	MISSENSE	FALSE	FALSE	11	2	13	11,2	1	SNP	0.153846
N2	2	I	288626	G	A	ztf-3	HIGH	stop_gained	NONSENSE	TRUE	TRUE	9	2	11	9,2	1	SNP	0.181818
N2	2	I	325820	T	TA	nol-14	HIGH	frameshift_variant	OTHER	TRUE	FALSE	17	4	21	17,4	1	Insertion	0.190476
N2	2	I	455620	G	A	tol-1	MODERATE	missense_variant	MISSENSE	FALSE	FALSE	12	2	14	12,2	1	SNP	0.142857
N2	2	I	493519	C	CT	haf-4	HIGH	frameshift_variant	OTHER	TRUE	FALSE	15	2	17	15,2	1	Insertion	0.117647
N2	2	I	696982	G	GT	Y18H1A.2	HIGH	frameshift_variant	OTHER	TRUE	FALSE	82	10	92	82,10	1	Insertion	0.108696
N2	2	I	904697	C	CA	gpa-16	HIGH	frameshift_variant	OTHER	TRUE	FALSE	45	10	55	45,10	1	Insertion	0.181818
N2	2	I	990053	T	G	hmbx-1	MODERATE	missense_variant	MISSENSE	FALSE	FALSE	8	2	10	8,2	1	SNP	0.2
N2	2	I	990054	G	A	hmbx-1	MODERATE	missense_variant	MISSENSE	FALSE	FALSE	8	2	10	8,2	1	SNP	0.2
N2	2	I	1040209	G	GA	Y34D9A.3	HIGH	frameshift_variant	OTHER	TRUE	FALSE	11	4	15	11,4	1	Insertion	0.266667
N2	2	I	1178242	G	GA	smg-2	HIGH	frameshift_variant	OTHER	TRUE	FALSE	35	9	44	35,9	1	Insertion	0.204545
N2	2	I	1199070	G	GA	Y48G8AL.5	HIGH	frameshift_variant	OTHER	TRUE	FALSE	46	9	55	46,9	1	Insertion	0.163636
N2	2	I	1232578	G	A	herc-1	MODERATE	missense_variant	MISSENSE	FALSE	FALSE	15	2	17	15,2	1	SNP	0.117647
N2	2	I	1232585	T	C	herc-1	MODERATE	missense_variant	MISSENSE	FALSE	FALSE	15	2	17	15,2	1	SNP	0.117647
N2	2	I	1356241	C	CA	Y92H12BL.1	HIGH	frameshift_variant	OTHER	TRUE	FALSE	30	8	38	30,8	1	Insertion	0.210526
N2	2	I	1420764	C	CA	Y92H12BR.3	HIGH	frameshift_variant	OTHER	TRUE	FALSE	36	9	45	36,9	1	Insertion	0.2
N2	2	I	1511329	C	CT	Y92H12A.5	HIGH	frameshift_variant	OTHER	TRUE	FALSE	14	7	21	14,7	1	Insertion	0.333333
N2	2	I	1517936	G	GA	Y92H12A.4	HIGH	frameshift_variant	OTHER	TRUE	FALSE	16	3	19	16,3	1	Insertion	0.157895
N2	2	I	1524472	G	GA	Y92H12A.4	HIGH	frameshift_variant	OTHER	TRUE	FALSE	160	22	182	160,22	1	Insertion	0.120879
N2	2	I	1619813	C	CT	adpr-1	HIGH	frameshift_variant	OTHER	TRUE	FALSE	15	4	19	15,4	1	Insertion	0.210526
N2	2	I	1785208	T	TA	ddx-27	HIGH	frameshift_variant	OTHER	TRUE	FALSE	28	8	36	28,8	1	Insertion	0.222222
N2	2	I	1785319	C	CA	ddx-27	HIGH	frameshift_variant	OTHER	TRUE	FALSE	41	8	49	41,8	1	Insertion	0.163265
N2	2	I	1875222	CAA	C	tub-2	HIGH	frameshift_variant	OTHER	TRUE	FALSE	9	2	11	9,2	1	Deletion	0.181818
N2	2	I	1876757	T	C	tub-2	LOW	synonymous_variant	SILENT	FALSE	FALSE	17	4	21	17,4	1	SNP	0.190476
N2	2	I	1876758	G	A	tub-2	MODERATE	missense_variant	MISSENSE	FALSE	FALSE	17	4	21	17,4	1	SNP	0.190476
N2	2	I	1926231	T	TA	hex-4	HIGH	frameshift_variant	OTHER	TRUE	FALSE	67	11	78	67,11	1	Insertion	0.141026
N2	2	I	2069578	G	C	rla-1	LOW	5_prime_UTR_premature_start_codon_gain_variant	OTHER	FALSE	FALSE	18	6	24	18,6	1	SNP	0.25
N2	2	I	2302260	T	TA	epg-2	HIGH	frameshift_variant	OTHER	TRUE	FALSE	16	5	21	16,5	1	Insertion	0.238095
N2	2	I	2320595	G	GT	mcm-4	HIGH	frameshift_variant	OTHER	TRUE	FALSE	54	8	62	54,8	1	Insertion	0.129032
N2	2	I	2421736	G	C	did-2	LOW	5_prime_UTR_premature_start_codon_gain_variant	OTHER	FALSE	FALSE	10	5	15	10,5	1	SNP	0.333333
N2	2	I	2432849	G	GT	tipn-1	HIGH	frameshift_variant	OTHER	TRUE	FALSE	111	22	133	111,22	1	Insertion	0.165414
N2	2	I	2495322	C	CA	Y23H5B.6	HIGH	frameshift_variant	OTHER	TRUE	FALSE	157	30	187	157,30	1	Insertion	0.160428
N2	2	I	2498378	C	CA	Y23H5B.5	HIGH	frameshift_variant	OTHER	TRUE	FALSE	13	7	20	13,7	1	Insertion	0.35
N2	2	I	2726640	C	CT	Y71F9B.6	HIGH	frameshift_variant	OTHER	FALSE	FALSE	18	4	22	18,4	1	Insertion	0.181818
N2	2	I	2830173	C	CT	pop-1	HIGH	frameshift_variant	OTHER	TRUE	FALSE	16	3	19	16,3	1	Insertion	0.157895
N2	2	I	2854777	T	C	W10C8.5	MODERATE	missense_variant	MISSENSE	FALSE	FALSE	6	4	10	6,4	1	SNP	0.4
N2	2	I	2876311	G	C	rpl-1	LOW	5_prime_UTR_premature_start_codon_gain_variant	OTHER	FALSE	FALSE	6	82	88	6,82	2	SNP	0.931818
N2	2	I	2919597	G	GT	parp-1	HIGH	frameshift_variant	OTHER	TRUE	FALSE	34	11	45	34,11	1	Insertion	0.244444
N2	2	I	3026574	G	GA	Y54E10BR.3	HIGH	frameshift_variant	OTHER	TRUE	FALSE	26	6	32	26,6	1	Insertion	0.1875
N2	2	I	3083984	C	CT	M01B12.4	HIGH	frameshift_variant	OTHER	FALSE	FALSE	28	4	32	28,4	1	Insertion	0.125
N2	2	I	3149969	C	CA	dscc-1	HIGH	frameshift_variant	OTHER	TRUE	FALSE	48	7	55	48,7	1	Insertion	0.127273
N2	2	I	3165064	C	CA	Y54E10A.6	HIGH	frameshift_variant	OTHER	TRUE	FALSE	20	5	25	20,5	1	Insertion	0.2
N2	2	I	3175214	TG	T	Y54E10A.10	HIGH	frameshift_variant	OTHER	TRUE	FALSE	11	2	13	11,2	1	Deletion	0.153846
N2	2	I	3190701	A	AT	Y54E10A.11	HIGH	frameshift_variant	OTHER	FALSE	FALSE	46	4	50	46,4	1	Insertion	0.08
N2	2	I	3369059	C	CA	W05F2.6	HIGH	frameshift_variant	OTHER	TRUE	FALSE	32	5	37	32,5	1	Insertion	0.135135
N2	2	I	3369295	G	GA	W05F2.6	HIGH	frameshift_variant	OTHER	TRUE	FALSE	22	8	30	22,8	1	Insertion	0.266667
N2	2	I	3449405	G	GA	msh-6	HIGH	frameshift_variant	OTHER	FALSE	FALSE	21	9	30	21,9	1	Insertion	0.3
N2	2	I	3452086	G	GA	msh-6	HIGH	frameshift_variant	OTHER	TRUE	FALSE	57	9	66	57,9	1	Insertion	0.136364
N2	2	I	3575039	C	CT	lpd-3	HIGH	frameshift_variant	OTHER	TRUE	FALSE	24	5	29	24,5	1	Insertion	0.172414
N2	2	I	3589548	C	CT	lpd-3	HIGH	frameshift_variant	OTHER	TRUE	FALSE	41	6	47	41,6	1	Insertion	0.12766
N2	2	I	3610494	G	GA	inx-22	HIGH	frameshift_variant	OTHER	TRUE	FALSE	69	9	78	69,9	1	Insertion	0.115385
N2	2	I	3612367	C	CT	inx-21	HIGH	frameshift_variant	OTHER	TRUE	FALSE	12	5	17	12,5	1	Insertion	0.294118
N2	2	I	3685641	G	GA	D1037.1	HIGH	frameshift_variant	OTHER	TRUE	FALSE	72	17	89	72,17	1	Insertion	0.191011
N2	2	I	3753188	C	CT	inx-13	HIGH	frameshift_variant	OTHER	TRUE	FALSE	7	3	10	7,3	1	Insertion	0.3
N2	2	I	3782707	G	GA	C32E8.5	HIGH	frameshift_variant	OTHER	TRUE	FALSE	84	12	96	84,12	1	Insertion	0.125
N2	2	I	3832413	A	AT	F53F10.2	HIGH	frameshift_variant	OTHER	TRUE	FALSE	15	3	18	15,3	1	Insertion	0.166667
N2	2	I	3863739	C	CT	hcp-4	HIGH	frameshift_variant	OTHER	TRUE	FALSE	53	8	61	53,8	1	Insertion	0.131148
N2	2	I	3864351	C	CT	hcp-4	HIGH	frameshift_variant	OTHER	TRUE	FALSE	74	12	86	74,12	1	Insertion	0.139535
N2	2	I	3868849	T	C	pgk-1	LOW	synonymous_variant	SILENT	FALSE	FALSE	153	18	171	153,18	1	SNP	0.105263
N2	2	I	3985385	C	CA	aars-2	HIGH	frameshift_variant	OTHER	TRUE	FALSE	126	28	154	126,28	1	Insertion	0.181818
N2	2	I	4056869	C	CA	unc-89	HIGH	frameshift_variant	OTHER	TRUE	FALSE	23	5	28	23,5	1	Insertion	0.178571
N2	2	I	4183924	C	CA	kel-20	HIGH	frameshift_variant	OTHER	TRUE	FALSE	17	3	20	17,3	1	Insertion	0.15
N2	2	I	4190501	A	AT	cas-2	HIGH	frameshift_variant	OTHER	TRUE	FALSE	15	3	18	15,3	1	Insertion	0.166667
N2	2	I	4204219	G	GT	C18E3.3	HIGH	frameshift_variant	OTHER	TRUE	FALSE	11	4	15	11,4	1	Insertion	0.266667
N2	2	I	4205058	T	C	C18E3.3	LOW	synonymous_variant	SILENT	FALSE	FALSE	16	7	23	16,7	1	SNP	0.304348
N2	2	I	4247475	G	GT	exoc-7	HIGH	frameshift_variant	OTHER	TRUE	FALSE	17	4	21	17,4	1	Insertion	0.190476
N2	2	I	4258959	T	TA	met-1	HIGH	frameshift_variant	OTHER	TRUE	FALSE	101	17	118	101,17	1	Insertion	0.144068
N2	2	I	4261175	C	CA	met-1	HIGH	frameshift_variant	OTHER	TRUE	FALSE	36	10	46	36,10	1	Insertion	0.217391
N2	2	I	4266477	G	GA	mus-81	HIGH	frameshift_variant	OTHER	TRUE	FALSE	27	6	33	27,6	1	Insertion	0.181818
N2	2	I	4305495	A	G	Y47D9A.1	MODERATE	missense_variant	MISSENSE	FALSE	FALSE	18	2	20	18,2	1	SNP	0.1
N2	2	I	4340383	G	GA	anc-1	HIGH	frameshift_variant	OTHER	TRUE	FALSE	13	3	16	13,3	1	Insertion	0.1875
N2	2	I	4340890	T	C	anc-1	MODERATE	missense_variant	MISSENSE	FALSE	FALSE	20	9	29	20,9	1	SNP	0.310345
N2	2	I	4373660	C	G	cec-10	LOW	5_prime_UTR_premature_start_codon_gain_variant	OTHER	FALSE	FALSE	16	4	20	16,4	1	SNP	0.2
N2	2	I	4383245	G	A	ZK973.1	MODERATE	missense_variant	MISSENSE	FALSE	FALSE	77	10	87	77,10	1	SNP	0.114943
N2	2	I	4442707	G	GT	C41D11.3	HIGH	frameshift_variant	OTHER	TRUE	FALSE	50	8	58	50,8	1	Insertion	0.137931
N2	2	I	4446939	C	T	cps-6	MODERATE	missense_variant	MISSENSE	FALSE	FALSE	17	3	20	17,3	1	SNP	0.15
N2	2	I	4451637	C	CT	eri-7	HIGH	frameshift_variant	OTHER	TRUE	FALSE	37	13	50	37,13	1	Insertion	0.26
N2	2	I	4502640	G	GA	gcy-28	HIGH	frameshift_variant	OTHER	TRUE	FALSE	105	17	122	105,17	1	Insertion	0.139344
N2	2	I	4513002	TTA	T	rnf-145	HIGH	frameshift_variant	OTHER	TRUE	FALSE	12	2	14	12,2	1	Deletion	0.142857
N2	2	I	4530758	C	CT	bet-1	HIGH	frameshift_variant	OTHER	TRUE	FALSE	36	14	50	36,14	1	Insertion	0.28
N2	2	I	4603537	G	GA	eaf-1	HIGH	frameshift_variant	OTHER	TRUE	FALSE	99	15	114	99,15	1	Insertion	0.131579
N2	2	I	4624374	C	CT	ubr-4	HIGH	frameshift_variant	OTHER	TRUE	FALSE	31	10	41	31,10	1	Insertion	0.243902
N2	2	I	4631828	G	GT	ubr-4	HIGH	frameshift_variant	OTHER	TRUE	FALSE	46	8	54	46,8	1	Insertion	0.148148
N2	2	I	4642154	A	AT	Y119C1A.1	HIGH	frameshift_variant	OTHER	TRUE	FALSE	81	17	98	81,17	1	Insertion	0.173469
N2	2	I	4659266	TG	T	ain-2	HIGH	frameshift_variant	OTHER	FALSE	FALSE	9	2	11	9,2	1	Deletion	0.181818
N2	2	I	4742617	C	CA	let-502	HIGH	frameshift_variant	OTHER	TRUE	FALSE	29	5	34	29,5	1	Insertion	0.147059
N2	2	I	4759434	C	CA	viln-1	HIGH	frameshift_variant	OTHER	FALSE	FALSE	37	6	43	37,6	1	Insertion	0.139535
N2	2	I	4776713	C	CT	M04F3.5	HIGH	frameshift_variant	OTHER	TRUE	FALSE	29	7	36	29,7	1	Insertion	0.194444
N2	2	I	4825394	C	CT	tofu-4	HIGH	frameshift_variant	OTHER	TRUE	FALSE	6	4	10	6,4	1	Insertion	0.4
N2	2	I	4831348	T	TA	F57C9.4	HIGH	frameshift_variant	OTHER	TRUE	FALSE	97	19	116	97,19	1	Insertion	0.163793
N2	2	I	4897352	C	CA	F21F3.4	HIGH	frameshift_variant	OTHER	TRUE	FALSE	29	8	37	29,8	1	Insertion	0.216216
N2	2	I	4935378	C	CA	dip-2	HIGH	frameshift_variant	OTHER	TRUE	FALSE	45	18	63	45,18	1	Insertion	0.285714
N2	2	I	4954362	C	CT	him-1	HIGH	frameshift_variant	OTHER	TRUE	FALSE	205	27	232	205,27	1	Insertion	0.116379
N2	2	I	5039618	C	CA	lfe-2	HIGH	frameshift_variant	OTHER	TRUE	FALSE	9	3	12	9,3	1	Insertion	0.25
N2	2	I	5106911	G	GA	use-1	HIGH	frameshift_variant	OTHER	TRUE	FALSE	40	8	48	40,8	1	Insertion	0.166667
N2	2	I	5113558	C	CT	Y110A7A.15	HIGH	frameshift_variant	OTHER	TRUE	FALSE	47	8	55	47,8	1	Insertion	0.145455
N2	2	I	5114864	C	CT	elpc-1	HIGH	frameshift_variant	OTHER	TRUE	FALSE	13	3	16	13,3	1	Insertion	0.1875
N2	2	I	5116313	G	GT	elpc-1	HIGH	frameshift_variant	OTHER	TRUE	FALSE	100	22	122	100,22	1	Insertion	0.180328
N2	2	I	5117577	TA	T	elpc-1	HIGH	frameshift_variant	OTHER	TRUE	FALSE	11	2	13	11,2	1	Deletion	0.153846
N2	2	I	5167129	C	CA	hcp-6	HIGH	frameshift_variant	OTHER	TRUE	FALSE	56	8	64	56,8	1	Insertion	0.125
N2	2	I	5180547	A	AT	npp-6	HIGH	frameshift_variant	OTHER	TRUE	FALSE	34	6	40	34,6	1	Insertion	0.15
N2	2	I	5254313	G	GA	let-363	HIGH	frameshift_variant	OTHER	TRUE	FALSE	72	14	86	72,14	1	Insertion	0.162791
N2	2	I	5318038	C	CT	F48C1.5	HIGH	frameshift_variant	OTHER	TRUE	FALSE	13	5	18	13,5	1	Insertion	0.277778
N2	2	I	5348553	C	CA	F55A12.5	HIGH	frameshift_variant	OTHER	TRUE	FALSE	56	18	74	56,18	1	Insertion	0.243243
N2	2	I	5348693	G	GA	F55A12.5	HIGH	frameshift_variant	OTHER	TRUE	FALSE	201	47	248	201,47	1	Insertion	0.189516
N2	2	I	5360469	T	TGG	ppk-1	HIGH	frameshift_variant	OTHER	TRUE	FALSE	18	2	20	18,2	1	Insertion	0.1
N2	2	I	5360477	A	T	ppk-1	MODERATE	missense_variant	MISSENSE	FALSE	FALSE	15	2	17	15,2	1	SNP	0.117647
N2	2	I	5413846	G	GT	coq-1	HIGH	frameshift_variant	OTHER	TRUE	FALSE	8	2	10	8,2	1	Insertion	0.2
N2	2	I	5427431	A	AT	F27C1.6	HIGH	frameshift_variant	OTHER	TRUE	FALSE	46	7	53	46,7	1	Insertion	0.132075
N2	2	I	5428174	G	GT	F27C1.6	HIGH	frameshift_variant	OTHER	TRUE	FALSE	95	12	107	95,12	1	Insertion	0.11215
N2	2	I	5479154	G	GT	let-355	HIGH	frameshift_variant	OTHER	TRUE	FALSE	22	5	27	22,5	1	Insertion	0.185185
N2	2	I	5513399	C	CA	F59A3.2	HIGH	frameshift_variant	OTHER	TRUE	FALSE	24	4	28	24,4	1	Insertion	0.142857
N2	2	I	5514195	T	TA	F59A3.2	HIGH	frameshift_variant	OTHER	TRUE	FALSE	24	9	33	24,9	1	Insertion	0.272727
N2	2	I	5572952	G	C	cey-3	LOW	5_prime_UTR_premature_start_codon_gain_variant	OTHER	FALSE	FALSE	25	32	57	25,32	1	SNP	0.561404
N2	2	I	5573814	G	GA	rmh-1	HIGH	frameshift_variant	OTHER	TRUE	FALSE	17	4	21	17,4	1	Insertion	0.190476
N2	2	I	5630561	C	CA	F46F11.1	HIGH	frameshift_variant	OTHER	TRUE	FALSE	9	4	13	9,4	1	Insertion	0.307692
N2	2	I	5647500	C	CT	F55F8.2	HIGH	frameshift_variant	OTHER	TRUE	FALSE	37	8	45	37,8	1	Insertion	0.177778
N2	2	I	5649508	C	CT	F55F8.2	HIGH	frameshift_variant	OTHER	TRUE	FALSE	43	6	49	43,6	1	Insertion	0.122449
N2	2	I	5654271	C	CT	cir-1	HIGH	frameshift_variant	OTHER	TRUE	FALSE	53	10	63	53,10	1	Insertion	0.15873
N2	2	I	5760259	C	CT	ccpp-1	HIGH	frameshift_variant	OTHER	TRUE	FALSE	12	3	15	12,3	1	Insertion	0.2
N2	2	I	5761744	C	CA	oxy-5	HIGH	frameshift_variant	OTHER	TRUE	FALSE	23	5	28	23,5	1	Insertion	0.178571
N2	2	I	5775043	T	TA	hil-5	HIGH	frameshift_variant	OTHER	TRUE	FALSE	146	22	168	146,22	1	Insertion	0.130952
N2	2	I	5790888	G	GT	cpb-3	HIGH	frameshift_variant	OTHER	TRUE	FALSE	72	17	89	72,17	1	Insertion	0.191011
N2	2	I	5791382	A	AT	cpb-3	HIGH	frameshift_variant	OTHER	TRUE	FALSE	33	6	39	33,6	1	Insertion	0.153846
N2	2	I	5794889	C	CT	glh-3	HIGH	frameshift_variant	OTHER	FALSE	FALSE	16	4	20	16,4	1	Insertion	0.2
N2	2	I	5799773	G	GT	mtk-1	HIGH	frameshift_variant	OTHER	TRUE	FALSE	31	6	37	31,6	1	Insertion	0.162162
N2	2	I	5800943	C	CT	mtk-1	HIGH	frameshift_variant	OTHER	FALSE	FALSE	38	7	45	38,7	1	Insertion	0.155556
N2	2	I	5819940	C	CT	nhr-2	HIGH	frameshift_variant	OTHER	TRUE	FALSE	11	3	14	11,3	1	Insertion	0.214286
N2	2	I	5823672	A	AT	C32F10.8	HIGH	frameshift_variant	OTHER	TRUE	FALSE	82	14	96	82,14	1	Insertion	0.145833
N2	2	I	5833072	G	GA	obr-4	HIGH	frameshift_variant	OTHER	TRUE	FALSE	12	3	15	12,3	1	Insertion	0.2
N2	2	I	5857780	G	GT	hpo-3	HIGH	frameshift_variant	OTHER	TRUE	FALSE	103	15	118	103,15	1	Insertion	0.127119
N2	2	I	5873885	G	GA	cdc-7	HIGH	frameshift_variant	OTHER	TRUE	FALSE	9	3	12	9,3	1	Insertion	0.25
N2	2	I	5903305	A	AT	stam-1	HIGH	frameshift_variant	OTHER	TRUE	FALSE	39	9	48	39,9	1	Insertion	0.1875
N2	2	I	6020663	T	TA	inst-1	HIGH	frameshift_variant	OTHER	TRUE	FALSE	124	16	140	124,16	1	Insertion	0.114286
N2	2	I	6020765	G	GA	inst-1	HIGH	frameshift_variant	OTHER	TRUE	FALSE	40	10	50	40,10	1	Insertion	0.2
N2	2	I	6040740	G	GA	let-391	HIGH	frameshift_variant	OTHER	TRUE	FALSE	18	3	21	18,3	1	Insertion	0.142857
N2	2	I	6066033	C	T	C27A12.9	HIGH	stop_gained	NONSENSE	TRUE	TRUE	16	2	18	16,2	1	SNP	0.111111
N2	2	I	6066034	C	T	C27A12.9	HIGH	stop_gained	NONSENSE	TRUE	TRUE	16	2	18	16,2	1	SNP	0.111111
N2	2	I	6114279	C	CA	usp-5	HIGH	frameshift_variant	OTHER	FALSE	FALSE	36	7	43	36,7	1	Insertion	0.162791
N2	2	I	6183859	G	C	chn-1	LOW	5_prime_UTR_premature_start_codon_gain_variant	OTHER	FALSE	FALSE	6	4	10	6,4	1	SNP	0.4
N2	2	I	6211565	C	CT	mrpl-23	HIGH	frameshift_variant	OTHER	TRUE	FALSE	70	15	85	70,15	1	Insertion	0.176471
N2	2	I	6369037	T	TA	ZC308.4	HIGH	frameshift_variant	OTHER	TRUE	FALSE	38	12	50	38,12	1	Insertion	0.24
N2	2	I	6384233	C	CA	gld-2	HIGH	frameshift_variant	OTHER	TRUE	FALSE	12	7	19	12,7	1	Insertion	0.368421
N2	2	I	6448336	T	TA	npp-12	HIGH	frameshift_variant	OTHER	TRUE	FALSE	39	7	46	39,7	1	Insertion	0.152174
N2	2	I	6450091	G	GA	npp-12	HIGH	frameshift_variant	OTHER	TRUE	FALSE	11	5	16	11,5	1	Insertion	0.3125
N2	2	I	6458247	C	CT	rab-10	HIGH	frameshift_variant	OTHER	TRUE	FALSE	117	23	140	117,23	1	Insertion	0.164286
N2	2	I	6461786	G	GA	knl-2	HIGH	frameshift_variant	OTHER	TRUE	FALSE	28	7	35	28,7	1	Insertion	0.2
N2	2	I	6475310	C	CA	K06A5.1	HIGH	frameshift_variant	OTHER	TRUE	FALSE	36	6	42	36,6	1	Insertion	0.142857
N2	2	I	6475862	T	TA	K06A5.1	HIGH	frameshift_variant	OTHER	TRUE	FALSE	131	24	155	131,24	1	Insertion	0.154839
N2	2	I	6491056	G	GT	dbr-1	HIGH	frameshift_variant	OTHER	TRUE	FALSE	36	5	41	36,5	1	Insertion	0.121951
N2	2	I	6550330	C	CT	F57B10.8	HIGH	frameshift_variant	OTHER	FALSE	FALSE	43	11	54	43,11	1	Insertion	0.203704
N2	2	I	6557378	C	CA	tre-1	HIGH	frameshift_variant	OTHER	TRUE	FALSE	132	23	155	132,23	1	Insertion	0.148387
N2	2	I	6565823	G	GT	mei-2	HIGH	frameshift_variant	OTHER	FALSE	FALSE	15	3	18	15,3	1	Insertion	0.166667
N2	2	I	6568500	C	CA	F57B10.4	HIGH	frameshift_variant	OTHER	TRUE	FALSE	25	4	29	25,4	1	Insertion	0.137931
N2	2	I	6625522	C	CT	ppfr-2	HIGH	frameshift_variant	OTHER	TRUE	FALSE	82	21	103	82,21	1	Insertion	0.203883
N2	2	I	6626352	C	CT	ppfr-2	HIGH	frameshift_variant	OTHER	TRUE	FALSE	30	6	36	30,6	1	Insertion	0.166667
N2	2	I	6663552	G	GA	nekl-2	HIGH	frameshift_variant	OTHER	TRUE	FALSE	6	5	11	6,5	1	Insertion	0.454545
N2	2	I	6740997	G	GA	dhod-1	HIGH	frameshift_variant	OTHER	FALSE	FALSE	9	3	12	9,3	1	Insertion	0.25
N2	2	I	6748701	G	GT	fnci-1	HIGH	frameshift_variant	OTHER	TRUE	FALSE	9	3	12	9,3	1	Insertion	0.25
N2	2	I	6756118	C	CT	hrpf-1	HIGH	frameshift_variant	OTHER	TRUE	FALSE	51	10	61	51,10	1	Insertion	0.163934
N2	2	I	6836466	C	G	ahcy-1	LOW	5_prime_UTR_premature_start_codon_gain_variant	OTHER	FALSE	FALSE	17	25	42	17,25	1	SNP	0.595238
N2	2	I	6838418	C	G	dpf-3	HIGH	stop_gained	NONSENSE	TRUE	TRUE	50	9	59	50,9	1	SNP	0.152542
N2	2	I	6842781	T	TA	dpf-3	HIGH	frameshift_variant	OTHER	TRUE	FALSE	78	12	90	78,12	1	Insertion	0.133333
N2	2	I	6904229	C	CT	smg-1	HIGH	frameshift_variant	OTHER	TRUE	FALSE	40	6	46	40,6	1	Insertion	0.130435
N2	2	I	6931180	C	CA	cerk-1	HIGH	frameshift_variant	OTHER	FALSE	FALSE	12	4	16	12,4	1	Insertion	0.25
N2	2	I	6947951	C	CT	hrde-4	HIGH	frameshift_variant	OTHER	TRUE	FALSE	16	6	22	16,6	1	Insertion	0.272727
N2	2	I	6949971	G	GT	hrde-4	HIGH	frameshift_variant	OTHER	TRUE	FALSE	32	8	40	32,8	1	Insertion	0.2
N2	2	I	7010653	G	GT	chd-1	HIGH	frameshift_variant	OTHER	TRUE	FALSE	93	11	104	93,11	1	Insertion	0.105769
N2	2	I	7013782	C	CT	chd-1	HIGH	frameshift_variant	OTHER	TRUE	FALSE	15	3	18	15,3	1	Insertion	0.166667
N2	2	I	7013908	C	CT	chd-1	HIGH	frameshift_variant	OTHER	TRUE	FALSE	85	34	119	85,34	1	Insertion	0.285714
N2	2	I	7014574	C	CT	chd-1	HIGH	frameshift_variant	OTHER	TRUE	FALSE	79	11	90	79,11	1	Insertion	0.122222
N2	2	I	7017537	C	CT	pdi-3	HIGH	frameshift_variant	OTHER	TRUE	FALSE	55	10	65	55,10	1	Insertion	0.153846
N2	2	I	7080683	C	CT	F22D6.2	HIGH	frameshift_variant	OTHER	TRUE	FALSE	98	14	112	98,14	1	Insertion	0.125
N2	2	I	7094189	C	CT	prpf-4	HIGH	frameshift_variant	OTHER	TRUE	FALSE	150	21	171	150,21	1	Insertion	0.122807
N2	2	I	7154974	A	AT	crml-1	HIGH	frameshift_variant	OTHER	TRUE	FALSE	49	10	59	49,10	1	Insertion	0.169492
N2	2	I	7225269	G	GA	swsn-9	HIGH	frameshift_variant	OTHER	TRUE	FALSE	100	18	118	100,18	1	Insertion	0.152542
N2	2	I	7231258	T	TCA	hasp-1	HIGH	frameshift_variant	OTHER	TRUE	FALSE	11	2	13	11,2	1	Insertion	0.153846
N2	2	I	7231260	GTTC	G	hasp-1	MODERATE	conservative_inframe_deletion	OTHER	FALSE	FALSE	11	2	13	11,2	1	Deletion	0.153846
N2	2	I	7231265	T	C	hasp-1	MODERATE	missense_variant	MISSENSE	FALSE	FALSE	11	2	13	11,2	1	SNP	0.153846
N2	2	I	7231757	C	CT	hasp-1	HIGH	frameshift_variant	OTHER	TRUE	FALSE	39	10	49	39,10	1	Insertion	0.204082
N2	2	I	7234028	TA	T	R06C7.2	HIGH	frameshift_variant	OTHER	TRUE	FALSE	19	4	23	19,4	1	Deletion	0.173913
N2	2	I	7235792	T	TA	wago-1	HIGH	frameshift_variant	OTHER	TRUE	FALSE	158	22	180	158,22	1	Insertion	0.122222
N2	2	I	7281377	A	AT	rde-2	HIGH	frameshift_variant	OTHER	TRUE	FALSE	90	12	102	90,12	1	Insertion	0.117647
N2	2	I	7302183	G	GT	ttx-7	HIGH	frameshift_variant	OTHER	TRUE	FALSE	26	5	31	26,5	1	Insertion	0.16129
N2	2	I	7302900	C	CTT	ttx-7	HIGH	frameshift_variant	OTHER	TRUE	FALSE	16	3	19	16,3	1	Insertion	0.157895
N2	2	I	7349338	G	GA	kbrl-1	HIGH	frameshift_variant	OTHER	TRUE	FALSE	96	14	110	96,14	1	Insertion	0.127273
N2	2	I	7349659	G	GA	kbrl-1	HIGH	frameshift_variant	OTHER	TRUE	FALSE	63	15	78	63,15	1	Insertion	0.192308
N2	2	I	7460161	C	CA	lars-2	HIGH	frameshift_variant	OTHER	TRUE	FALSE	15	3	18	15,3	1	Insertion	0.166667
N2	2	I	7539370	C	CT	dcp-66	HIGH	frameshift_variant	OTHER	TRUE	FALSE	85	21	106	85,21	1	Insertion	0.198113
N2	2	I	7540146	C	CT	dcp-66	HIGH	frameshift_variant	OTHER	TRUE	FALSE	22	7	29	22,7	1	Insertion	0.241379
N2	2	I	7541277	C	CT	dcp-66	HIGH	frameshift_variant	OTHER	TRUE	FALSE	52	10	62	52,10	1	Insertion	0.16129
N2	2	I	7556607	G	GA	chs-1	HIGH	frameshift_variant	OTHER	TRUE	FALSE	261	63	324	261,63	1	Insertion	0.194444
N2	2	I	7558266	G	GA	chs-1	HIGH	frameshift_variant	OTHER	TRUE	FALSE	557	91	648	557,91	1	Insertion	0.140432
N2	2	I	7617678	CATG	C	lrp-1	MODERATE	disruptive_inframe_deletion	OTHER	FALSE	FALSE	11	2	13	11,2	1	Deletion	0.153846
N2	2	I	7623285	CA	C	lrp-1	HIGH	frameshift_variant	OTHER	TRUE	FALSE	10	2	12	10,2	1	Deletion	0.166667
N2	2	I	7637229	C	CT	capg-1	HIGH	frameshift_variant	OTHER	TRUE	FALSE	130	19	149	130,19	1	Insertion	0.127517
N2	2	I	7646461	G	GT	rrf-1	HIGH	frameshift_variant	OTHER	TRUE	FALSE	36	7	43	36,7	1	Insertion	0.162791
N2	2	I	7703279	T	TA	F27D4.1	HIGH	frameshift_variant	OTHER	TRUE	FALSE	59	14	73	59,14	1	Insertion	0.191781
N2	2	I	7706557	C	CT	lsy-22	HIGH	frameshift_variant	OTHER	FALSE	FALSE	26	11	37	26,11	1	Insertion	0.297297
N2	2	I	7728527	C	CA	bckd-1B	HIGH	frameshift_variant	OTHER	TRUE	FALSE	45	6	51	45,6	1	Insertion	0.117647
N2	2	I	7775336	C	CA	adr-1	HIGH	frameshift_variant	OTHER	TRUE	FALSE	59	8	67	59,8	1	Insertion	0.119403
N2	2	I	7776168	G	GA	adr-1	HIGH	frameshift_variant	OTHER	TRUE	FALSE	47	10	57	47,10	1	Insertion	0.175439
N2	2	I	7815685	T	TA	D2005.4	HIGH	frameshift_variant	OTHER	TRUE	FALSE	8	4	12	8,4	1	Insertion	0.333333
N2	2	I	7858134	C	T	nud-2	LOW	synonymous_variant	SILENT	FALSE	FALSE	66	7	73	66,7	1	SNP	0.0958904
N2	2	I	7859241	C	CT	nud-2	HIGH	frameshift_variant	OTHER	TRUE	FALSE	182	48	230	182,48	1	Insertion	0.208696
N2	2	I	7869900	A	G	pck-2	LOW	5_prime_UTR_premature_start_codon_gain_variant	OTHER	FALSE	FALSE	16	3	19	16,3	1	SNP	0.157895
N2	2	I	7934394	C	CT	nmy-2	HIGH	frameshift_variant	OTHER	FALSE	FALSE	80	17	97	80,17	1	Insertion	0.175258
N2	2	I	7937365	G	GA	T22C1.1	HIGH	frameshift_variant	OTHER	TRUE	FALSE	223	35	258	223,35	1	Insertion	0.135659
N2	2	I	7941357	G	GA	T22C1.5	HIGH	frameshift_variant	OTHER	TRUE	FALSE	70	18	88	70,18	1	Insertion	0.204545
N2	2	I	7943590	T	TA	T22C1.6	HIGH	frameshift_variant	OTHER	TRUE	FALSE	79	11	90	79,11	1	Insertion	0.122222
N2	2	I	7987131	C	CA	H05L14.2	HIGH	frameshift_variant	OTHER	TRUE	FALSE	30	5	35	30,5	1	Insertion	0.142857
N2	2	I	8016385	A	AT	rskn-2	HIGH	frameshift_variant	OTHER	TRUE	FALSE	18	5	23	18,5	1	Insertion	0.217391
N2	2	I	8025197	C	CT	C54G4.9	HIGH	frameshift_variant	OTHER	TRUE	FALSE	24	5	29	24,5	1	Insertion	0.172414
N2	2	I	8053461	C	CA	apr-1	HIGH	frameshift_variant	OTHER	TRUE	FALSE	36	6	42	36,6	1	Insertion	0.142857
N2	2	I	8060120	G	GA	K04G2.10	HIGH	frameshift_variant	OTHER	TRUE	FALSE	15	6	21	15,6	1	Insertion	0.285714
N2	2	I	8083968	G	GA	rme-8	HIGH	frameshift_variant	OTHER	FALSE	FALSE	16	3	19	16,3	1	Insertion	0.157895
N2	2	I	8090675	T	C	rme-8	MODERATE	missense_variant	MISSENSE	FALSE	FALSE	9	4	13	9,4	1	SNP	0.307692
N2	2	I	8217509	A	AT	gla-3	HIGH	frameshift_variant	OTHER	FALSE	FALSE	32	7	39	32,7	1	Insertion	0.179487
N2	2	I	8293562	C	CT	npp-2	HIGH	frameshift_variant	OTHER	FALSE	FALSE	21	4	25	21,4	1	Insertion	0.16
N2	2	I	8299030	C	CT	abts-1	HIGH	frameshift_variant	OTHER	TRUE	FALSE	26	5	31	26,5	1	Insertion	0.16129
N2	2	I	8326213	C	CA	cep-1	HIGH	frameshift_variant	OTHER	TRUE	FALSE	14	3	17	14,3	1	Insertion	0.176471
N2	2	I	8333377	A	G	mys-4	MODERATE	missense_variant	MISSENSE	FALSE	FALSE	16	2	18	16,2	1	SNP	0.111111
N2	2	I	8333378	G	A	mys-4	MODERATE	missense_variant	MISSENSE	FALSE	FALSE	16	2	18	16,2	1	SNP	0.111111
N2	2	I	8337628	G	GA	C34B7.2	HIGH	frameshift_variant	OTHER	TRUE	FALSE	24	8	32	24,8	1	Insertion	0.25
N2	2	I	8361700	G	GT	rsd-6	HIGH	frameshift_variant	OTHER	TRUE	FALSE	236	30	266	236,30	1	Insertion	0.112782
N2	2	I	8366606	C	CT	tbcd-1	HIGH	frameshift_variant	OTHER	TRUE	FALSE	27	7	34	27,7	1	Insertion	0.205882
N2	2	I	8407381	C	CA	F02E9.1	HIGH	frameshift_variant	OTHER	TRUE	FALSE	13	3	16	13,3	1	Insertion	0.1875
N2	2	I	8419556	T	TA	sin-3	HIGH	frameshift_variant	OTHER	TRUE	FALSE	100	17	117	100,17	1	Insertion	0.145299
N2	2	I	8437896	A	AT	F10D11.2	HIGH	frameshift_variant	OTHER	TRUE	FALSE	38	8	46	38,8	1	Insertion	0.173913
N2	2	I	8488688	C	CA	D1081.7	HIGH	frameshift_variant	OTHER	TRUE	FALSE	139	22	161	139,22	1	Insertion	0.136646
N2	2	I	8525301	A	AT	K02B12.5	HIGH	frameshift_variant	OTHER	TRUE	FALSE	43	6	49	43,6	1	Insertion	0.122449
N2	2	I	8525586	C	CT	K02B12.5	HIGH	frameshift_variant	OTHER	TRUE	FALSE	10	4	14	10,4	1	Insertion	0.285714
N2	2	I	8576081	C	CA	rskn-1	HIGH	frameshift_variant	OTHER	TRUE	FALSE	49	12	61	49,12	1	Insertion	0.196721
N2	2	I	8601357	C	G	snrp-27	LOW	5_prime_UTR_premature_start_codon_gain_variant	OTHER	FALSE	FALSE	2	8	10	2,8	1	SNP	0.8
N2	2	I	8601592	C	CA	snrp-27	HIGH	frameshift_variant	OTHER	TRUE	FALSE	169	41	210	169,41	1	Insertion	0.195238
N2	2	I	8640766	G	GA	F43G9.12	HIGH	frameshift_variant	OTHER	TRUE	FALSE	111	27	138	111,27	1	Insertion	0.195652
N2	2	I	8645253	G	GA	syx-17	HIGH	frameshift_variant	OTHER	TRUE	FALSE	8	4	12	8,4	1	Insertion	0.333333
N2	2	I	8664123	G	C	syp-3	LOW	5_prime_UTR_premature_start_codon_gain_variant	OTHER	FALSE	FALSE	19	8	27	19,8	1	SNP	0.296296
N2	2	I	8667743	C	CA	K07A12.1	HIGH	frameshift_variant	OTHER	TRUE	FALSE	34	8	42	34,8	1	Insertion	0.190476
N2	2	I	8692314	C	CT	mrps-15	HIGH	frameshift_variant	OTHER	TRUE	FALSE	8	2	10	8,2	1	Insertion	0.2
N2	2	I	8727538	C	CT	pas-4	HIGH	frameshift_variant	OTHER	TRUE	FALSE	38	8	46	38,8	1	Insertion	0.173913
N2	2	I	8730221	T	TA	C36B1.14	HIGH	frameshift_variant	OTHER	TRUE	FALSE	7	3	10	7,3	1	Insertion	0.3
N2	2	I	8738903	C	CA	gls-1	HIGH	frameshift_variant	OTHER	TRUE	FALSE	128	17	145	128,17	1	Insertion	0.117241
N2	2	I	8754091	G	GA	imp-1	HIGH	frameshift_variant	OTHER	TRUE	FALSE	20	4	24	20,4	1	Insertion	0.166667
N2	2	I	8756132	C	CT	C36B1.11	HIGH	frameshift_variant	OTHER	TRUE	FALSE	59	8	67	59,8	1	Insertion	0.119403
N2	2	I	8770968	A	AT	trt-1	HIGH	frameshift_variant	OTHER	TRUE	FALSE	21	7	28	21,7	1	Insertion	0.25
N2	2	I	8806857	C	CT	cids-2	HIGH	frameshift_variant	OTHER	TRUE	FALSE	24	5	29	24,5	1	Insertion	0.172414
N2	2	I	8817179	C	CA	F36A2.9	HIGH	frameshift_variant	OTHER	TRUE	FALSE	90	13	103	90,13	1	Insertion	0.126214
N2	2	I	8818181	G	GA	F36A2.9	HIGH	frameshift_variant	OTHER	TRUE	FALSE	33	7	40	33,7	1	Insertion	0.175
N2	2	I	8903244	G	GT	T08G11.4	HIGH	frameshift_variant	OTHER	TRUE	FALSE	7	3	10	7,3	1	Insertion	0.3
N2	2	I	8906604	G	GT	T08G11.1	HIGH	frameshift_variant	OTHER	TRUE	FALSE	246	29	275	246,29	1	Insertion	0.105455
N2	2	I	8907959	C	CT	T08G11.1	HIGH	frameshift_variant	OTHER	TRUE	FALSE	127	34	161	127,34	1	Insertion	0.21118
N2	2	I	8967663	A	AT	spd-2	HIGH	frameshift_variant	OTHER	TRUE	FALSE	22	5	27	22,5	1	Insertion	0.185185
N2	2	I	9005479	C	CT	fcp-1	HIGH	frameshift_variant	OTHER	TRUE	FALSE	62	10	72	62,10	1	Insertion	0.138889
N2	2	I	9006542	G	GT	fcp-1	HIGH	frameshift_variant	OTHER	TRUE	FALSE	31	6	37	31,6	1	Insertion	0.162162
N2	2	I	9017094	T	A	F36F2.2	MODERATE	missense_variant	MISSENSE	FALSE	FALSE	15	2	17	15,2	1	SNP	0.117647
N2	2	I	9017095	C	G	F36F2.2	MODERATE	missense_variant	MISSENSE	FALSE	FALSE	15	2	17	15,2	1	SNP	0.117647
N2	2	I	9061972	C	CT	prmt-7	HIGH	frameshift_variant	OTHER	TRUE	FALSE	8	3	11	8,3	1	Insertion	0.272727
N2	2	I	9068782	T	TA	rad-54	HIGH	frameshift_variant	OTHER	TRUE	FALSE	8	4	12	8,4	1	Insertion	0.333333
N2	2	I	9160699	C	CT	clsp-1	HIGH	frameshift_variant	OTHER	TRUE	FALSE	28	8	36	28,8	1	Insertion	0.222222
N2	2	I	9161139	A	AT	clsp-1	HIGH	frameshift_variant	OTHER	TRUE	FALSE	75	16	91	75,16	1	Insertion	0.175824
N2	2	I	9161367	G	GT	clsp-1	HIGH	frameshift_variant	OTHER	TRUE	FALSE	86	13	99	86,13	1	Insertion	0.131313
N2	2	I	9162744	C	CT	clsp-1	HIGH	frameshift_variant	OTHER	TRUE	FALSE	61	11	72	61,11	1	Insertion	0.152778
N2	2	I	9222072	C	CT	aspm-1	HIGH	frameshift_variant	OTHER	FALSE	FALSE	131	31	162	131,31	1	Insertion	0.191358
N2	2	I	9225287	C	CT	aspm-1	HIGH	frameshift_variant	OTHER	TRUE	FALSE	12	3	15	12,3	1	Insertion	0.2
N2	2	I	9369061	C	CT	ppfr-1	HIGH	frameshift_variant	OTHER	TRUE	FALSE	27	12	39	27,12	1	Insertion	0.307692
N2	2	I	9394952	G	GT	F16A11.1	HIGH	frameshift_variant	OTHER	TRUE	FALSE	17	4	21	17,4	1	Insertion	0.190476
N2	2	I	9423221	G	GA	C17E4.6	HIGH	frameshift_variant	OTHER	TRUE	FALSE	47	10	57	47,10	1	Insertion	0.175439
N2	2	I	9518642	A	AT	C41G7.3	HIGH	frameshift_variant	OTHER	FALSE	FALSE	9	2	11	9,2	1	Insertion	0.181818
N2	2	I	9554887	AT	A	swah-1	HIGH	frameshift_variant	OTHER	TRUE	FALSE	10	2	12	10,2	1	Deletion	0.166667
N2	2	I	9582399	C	CT	K07A1.17	HIGH	frameshift_variant	OTHER	TRUE	FALSE	61	11	72	61,11	1	Insertion	0.152778
N2	2	I	9586606	G	GA	dut-1	HIGH	frameshift_variant	OTHER	TRUE	FALSE	56	9	65	56,9	1	Insertion	0.138462
N2	2	I	9610116	A	AT	ile-1	HIGH	frameshift_variant	OTHER	TRUE	FALSE	43	6	49	43,6	1	Insertion	0.122449
N2	2	I	9626907	G	GA	hsr-9	HIGH	frameshift_variant	OTHER	TRUE	FALSE	211	47	258	211,47	1	Insertion	0.182171
N2	2	I	9627385	C	CA	hsr-9	HIGH	frameshift_variant	OTHER	TRUE	FALSE	88	14	102	88,14	1	Insertion	0.137255
N2	2	I	9629114	G	GA	hsr-9	HIGH	frameshift_variant	OTHER	TRUE	FALSE	193	31	224	193,31	1	Insertion	0.138393
N2	2	I	9689194	C	G	rpl-14	LOW	5_prime_UTR_premature_start_codon_gain_variant	OTHER	FALSE	FALSE	4	10	14	4,10	1	SNP	0.714286
N2	2	I	9723863	GCA	G	eat-16	HIGH	frameshift_variant	OTHER	TRUE	FALSE	16	2	18	16,2	1	Deletion	0.111111
N2	2	I	9727953	C	CT	ocrl-1	HIGH	frameshift_variant	OTHER	FALSE	FALSE	38	6	44	38,6	1	Insertion	0.136364
N2	2	I	9778683	T	C	F26E4.7	MODERATE	missense_variant	MISSENSE	FALSE	FALSE	10	2	12	10,2	1	SNP	0.166667
N2	2	I	9778685	A	G	F26E4.7	MODERATE	missense_variant	MISSENSE	FALSE	FALSE	10	2	12	10,2	1	SNP	0.166667
N2	2	I	9898691	C	G	mom-4	MODERATE	missense_variant	MISSENSE	FALSE	FALSE	11	2	13	11,2	1	SNP	0.153846
N2	2	I	9898696	T	A	mom-4	MODERATE	missense_variant	MISSENSE	FALSE	FALSE	8	2	10	8,2	1	SNP	0.2
N2	2	I	9938108	C	CT	Y106G6A.1	HIGH	frameshift_variant	OTHER	FALSE	FALSE	20	6	26	20,6	1	Insertion	0.230769
N2	2	I	9974144	C	CT	T23D8.3	HIGH	frameshift_variant	OTHER	TRUE	FALSE	99	14	113	99,14	1	Insertion	0.123894
N2	2	I	9974206	G	GA	T23D8.3	HIGH	frameshift_variant	OTHER	TRUE	FALSE	89	11	100	89,11	1	Insertion	0.11
N2	2	I	10125436	G	GA	rbm-12	HIGH	frameshift_variant	OTHER	TRUE	FALSE	17	3	20	17,3	1	Insertion	0.15
N2	2	I	10162430	G	GA	C25A1.1	HIGH	frameshift_variant	OTHER	TRUE	FALSE	20	4	24	20,4	1	Insertion	0.166667
N2	2	I	10162990	G	GA	C25A1.1	HIGH	frameshift_variant	OTHER	TRUE	FALSE	18	3	21	18,3	1	Insertion	0.142857
N2	2	I	10179271	C	CA	C25A1.16	HIGH	frameshift_variant	OTHER	TRUE	FALSE	100	36	136	100,36	1	Insertion	0.264706
N2	2	I	10192835	G	C	lid-1	LOW	5_prime_UTR_premature_start_codon_gain_variant	OTHER	FALSE	FALSE	10	2	12	10,2	1	SNP	0.166667
N2	2	I	10271165	G	A	ZC247.1	LOW	synonymous_variant	SILENT	FALSE	FALSE	33	6	39	33,6	1	SNP	0.153846
N2	2	I	10271179	G	C	ZC247.1	MODERATE	missense_variant	MISSENSE	FALSE	FALSE	22	4	26	22,4	1	SNP	0.153846
N2	2	I	10271294	G	A	ZC247.1	LOW	synonymous_variant	SILENT	FALSE	FALSE	12	5	17	12,5	1	SNP	0.294118
N2	2	I	10337439	G	GA	ears-1	HIGH	frameshift_variant	OTHER	TRUE	FALSE	76	16	92	76,16	1	Insertion	0.173913
N2	2	I	10556430	G	GA	F25H2.6	HIGH	frameshift_variant	OTHER	TRUE	FALSE	104	13	117	104,13	1	Insertion	0.111111
N2	2	I	10574597	G	GA	rtel-1	HIGH	frameshift_variant	OTHER	TRUE	FALSE	39	6	45	39,6	1	Insertion	0.133333
N2	2	I	10576561	C	CA	rtel-1	HIGH	frameshift_variant	OTHER	TRUE	FALSE	27	9	36	27,9	1	Insertion	0.25
N2	2	I	10598703	T	G	pash-1	LOW	5_prime_UTR_premature_start_codon_gain_variant	OTHER	FALSE	FALSE	19	3	22	19,3	1	SNP	0.136364
N2	2	I	10598729	G	GA	pash-1	HIGH	frameshift_variant	OTHER	FALSE	FALSE	50	10	60	50,10	1	Insertion	0.166667
N2	2	I	10603272	T	TA	pash-1	HIGH	frameshift_variant	OTHER	TRUE	FALSE	8	3	11	8,3	1	Insertion	0.272727
N2	2	I	10626384	G	GA	B0511.6	HIGH	frameshift_variant	OTHER	TRUE	FALSE	29	5	34	29,5	1	Insertion	0.147059
N2	2	I	10670494	G	GA	fkb-7	HIGH	frameshift_variant	OTHER	TRUE	FALSE	10	3	13	10,3	1	Insertion	0.230769
N2	2	I	10685590	G	C	sdha-2	LOW	5_prime_UTR_premature_start_codon_gain_variant	OTHER	FALSE	FALSE	14	5	19	14,5	1	SNP	0.263158
N2	2	I	10687862	G	GA	kbp-5	HIGH	frameshift_variant	OTHER	TRUE	FALSE	20	5	25	20,5	1	Insertion	0.2
N2	2	I	10715747	A	AT	B0205.1	HIGH	frameshift_variant	OTHER	TRUE	FALSE	40	8	48	40,8	1	Insertion	0.166667
N2	2	I	10716495	G	GT	B0205.1	HIGH	frameshift_variant	OTHER	TRUE	FALSE	26	5	31	26,5	1	Insertion	0.16129
N2	2	I	10716869	C	CT	B0205.1	HIGH	frameshift_variant	OTHER	TRUE	FALSE	18	5	23	18,5	1	Insertion	0.217391
N2	2	I	10848202	G	GA	vet-2	HIGH	frameshift_variant	OTHER	TRUE	FALSE	15	4	19	15,4	1	Insertion	0.210526
N2	2	I	10928304	C	CT	F49D11.10	HIGH	frameshift_variant	OTHER	TRUE	FALSE	21	5	26	21,5	1	Insertion	0.192308
N2	2	I	10937250	C	CA	prp-17	HIGH	frameshift_variant	OTHER	TRUE	FALSE	154	23	177	154,23	1	Insertion	0.129944
N2	2	I	11036836	C	CT	dxbp-1	HIGH	frameshift_variant	OTHER	TRUE	FALSE	77	10	87	77,10	1	Insertion	0.114943
N2	2	I	11373973	CA	C	F56G4.6	HIGH	frameshift_variant	OTHER	TRUE	FALSE	10	2	12	10,2	1	Deletion	0.166667
N2	2	I	11374092	G	GT	F56G4.6	HIGH	frameshift_variant	OTHER	TRUE	FALSE	8	2	10	8,2	1	Insertion	0.2
N2	2	I	11374969	C	CA	F56G4.4	HIGH	frameshift_variant	OTHER	TRUE	FALSE	36	5	41	36,5	1	Insertion	0.121951
N2	2	I	11379307	G	GA	F56G4.4	HIGH	frameshift_variant	OTHER	TRUE	FALSE	145	19	164	145,19	1	Insertion	0.115854
N2	2	I	11439960	C	CA	C27C7.1	HIGH	frameshift_variant	OTHER	TRUE	FALSE	35	5	40	35,5	1	Insertion	0.125
N2	2	I	11546803	T	C	dys-1	MODERATE	missense_variant	MISSENSE	FALSE	FALSE	10	2	12	10,2	1	SNP	0.166667
N2	2	I	11610609	G	GT	C17D12.7	HIGH	frameshift_variant	OTHER	TRUE	FALSE	20	5	25	20,5	1	Insertion	0.2
N2	2	I	11611061	C	CT	C17D12.7	HIGH	frameshift_variant	OTHER	TRUE	FALSE	43	9	52	43,9	1	Insertion	0.173077
N2	2	I	11865963	C	CT	ced-1	HIGH	frameshift_variant	OTHER	TRUE	FALSE	25	8	33	25,8	1	Insertion	0.242424
N2	2	I	11868021	AT	A	ced-1	HIGH	frameshift_variant	OTHER	FALSE	FALSE	12	2	14	12,2	1	Deletion	0.142857
N2	2	I	11925424	C	CT	wve-1	HIGH	frameshift_variant	OTHER	TRUE	FALSE	33	8	41	33,8	1	Insertion	0.195122
N2	2	I	12046426	T	C	F58D5.9	LOW	synonymous_variant	SILENT	FALSE	FALSE	10	2	12	10,2	1	SNP	0.166667
N2	2	I	12046431	T	C	F58D5.9	MODERATE	missense_variant	MISSENSE	FALSE	FALSE	11	2	13	11,2	1	SNP	0.153846
N2	2	I	12046439	T	C	F58D5.9	MODERATE	missense_variant	MISSENSE	FALSE	FALSE	11	2	13	11,2	1	SNP	0.153846
N2	2	I	12046447	T	C	F58D5.9	LOW	synonymous_variant	SILENT	FALSE	FALSE	11	2	13	11,2	1	SNP	0.153846
N2	2	I	12210494	G	GA	C15C6.3	HIGH	frameshift_variant	OTHER	TRUE	FALSE	29	5	34	29,5	1	Insertion	0.147059
N2	2	I	12229365	A	T	F14B6.t1	LOW	synonymous_variant	SILENT	FALSE	FALSE	11	3	14	11,3	1	SNP	0.214286
N2	2	I	12487086	C	CA	pars-2	HIGH	frameshift_variant	OTHER	TRUE	FALSE	12	3	15	12,3	1	Insertion	0.2
N2	2	I	12647579	G	GT	mcrs-1	HIGH	frameshift_variant	OTHER	TRUE	FALSE	41	18	59	41,18	1	Insertion	0.305085
N2	2	I	12649029	A	AT	mcrs-1	HIGH	frameshift_variant	OTHER	TRUE	FALSE	13	3	16	13,3	1	Insertion	0.1875
N2	2	I	12652018	C	CT	mcrs-1	HIGH	frameshift_variant	OTHER	FALSE	FALSE	32	9	41	32,9	1	Insertion	0.219512
N2	2	I	12728718	G	GA	pfd-3	HIGH	frameshift_variant	OTHER	TRUE	FALSE	21	4	25	21,4	1	Insertion	0.16
N2	2	I	12798283	G	GT	attf-6	HIGH	frameshift_variant	OTHER	TRUE	FALSE	27	6	33	27,6	1	Insertion	0.181818
N2	2	I	12889308	C	CA	pad-1	HIGH	frameshift_variant	OTHER	TRUE	FALSE	10	3	13	10,3	1	Insertion	0.230769
N2	2	I	12901228	G	GA	pad-1	HIGH	frameshift_variant	OTHER	FALSE	FALSE	26	5	31	26,5	1	Insertion	0.16129
N2	2	I	12903466	C	A	coa-5	LOW	splice_region_variant	OTHER	FALSE	FALSE	9	2	11	9,2	1	SNP	0.181818
N2	2	I	12923137	G	GA	pfn-1	HIGH	frameshift_variant	OTHER	TRUE	FALSE	200	30	230	200,30	1	Insertion	0.130435
N2	2	I	12952248	C	G	acox-1.4	MODERATE	missense_variant	MISSENSE	FALSE	FALSE	12	2	14	12,2	1	SNP	0.142857
N2	2	I	12952250	C	G	acox-1.4	MODERATE	missense_variant	MISSENSE	FALSE	FALSE	12	2	14	12,2	1	SNP	0.142857
N2	2	I	13165378	G	GA	F22G12.5	HIGH	frameshift_variant	OTHER	TRUE	FALSE	98	22	120	98,22	1	Insertion	0.183333
N2	2	I	13292703	C	CA	top-1	HIGH	frameshift_variant	OTHER	FALSE	FALSE	399	81	480	399,81	1	Insertion	0.16875
N2	2	I	13294297	C	CA	top-1	HIGH	frameshift_variant	OTHER	TRUE	FALSE	126	15	141	126,15	1	Insertion	0.106383
N2	2	I	13303266	G	GT	T04D3.1	HIGH	frameshift_variant	OTHER	TRUE	FALSE	40	9	49	40,9	1	Insertion	0.183673
N2	2	I	13393903	G	A	C01A2.4	MODERATE	missense_variant	MISSENSE	FALSE	FALSE	9	2	11	9,2	1	SNP	0.181818
N2	2	I	13393904	C	T	C01A2.4	MODERATE	missense_variant	MISSENSE	FALSE	FALSE	9	2	11	9,2	1	SNP	0.181818
N2	2	I	13445149	T	TA	spr-5	HIGH	frameshift_variant	OTHER	TRUE	FALSE	36	9	45	36,9	1	Insertion	0.2
N2	2	I	13626078	C	CT	agef-1	HIGH	frameshift_variant	OTHER	TRUE	FALSE	58	9	67	58,9	1	Insertion	0.134328
N2	2	I	13667469	G	GA	W04A4.5	HIGH	frameshift_variant	OTHER	TRUE	FALSE	24	6	30	24,6	1	Insertion	0.2
N2	2	I	13821373	G	GT	W09G3.6	HIGH	frameshift_variant	OTHER	TRUE	FALSE	21	4	25	21,4	1	Insertion	0.16
N2	2	I	13839230	G	GT	W04A8.1	HIGH	frameshift_variant	OTHER	TRUE	FALSE	8	2	10	8,2	1	Insertion	0.2
N2	2	I	13839531	A	AT	W04A8.1	HIGH	frameshift_variant	OTHER	TRUE	FALSE	14	4	18	14,4	1	Insertion	0.222222
N2	2	I	13855207	T	TA	W04A8.6	HIGH	frameshift_variant	OTHER	TRUE	FALSE	131	21	152	131,21	1	Insertion	0.138158
N2	2	I	13863384	C	CA	taf-1	HIGH	frameshift_variant	OTHER	TRUE	FALSE	24	4	28	24,4	1	Insertion	0.142857
N2	2	I	13883551	G	GA	taf-1	HIGH	frameshift_variant	OTHER	TRUE	FALSE	43	14	57	43,14	1	Insertion	0.245614
N2	2	I	14113749	C	CA	Y63D3A.7	HIGH	frameshift_variant	OTHER	TRUE	FALSE	31	12	43	31,12	1	Insertion	0.27907
N2	2	I	14263687	G	A	pes-7	LOW	synonymous_variant	SILENT	FALSE	FALSE	10	3	13	10,3	1	SNP	0.230769
N2	2	I	14358682	C	CA	Y105E8A.3	HIGH	frameshift_variant	OTHER	FALSE	FALSE	6	4	10	6,4	1	Insertion	0.4
N2	2	I	14405601	G	GT	tcab-1	HIGH	frameshift_variant	OTHER	FALSE	FALSE	14	3	17	14,3	1	Insertion	0.176471
N2	2	I	14407477	G	GA	apg-1	HIGH	frameshift_variant	OTHER	TRUE	FALSE	47	11	58	47,11	1	Insertion	0.189655
N2	2	I	14469106	G	C	rps-20	LOW	5_prime_UTR_premature_start_codon_gain_variant	OTHER	FALSE	FALSE	3	19	22	3,19	1	SNP	0.863636
N2	2	I	14484922	C	CT	yars-1	HIGH	frameshift_variant	OTHER	TRUE	FALSE	13	3	16	13,3	1	Insertion	0.1875
N2	2	I	14508516	C	CT	Y105E8A.21	HIGH	frameshift_variant	OTHER	TRUE	FALSE	8	2	10	8,2	1	Insertion	0.2
N2	2	I	14516567	C	CT	exc-4	HIGH	frameshift_variant	OTHER	TRUE	FALSE	34	10	44	34,10	1	Insertion	0.227273
N2	2	I	14537135	G	GA	zoo-1	HIGH	frameshift_variant	OTHER	TRUE	FALSE	12	3	15	12,3	1	Insertion	0.2
N2	2	I	14636947	C	CT	exoc-8	HIGH	frameshift_variant	OTHER	TRUE	FALSE	43	11	54	43,11	1	Insertion	0.203704
N2	2	I	14712953	G	GA	Y54E5A.7	HIGH	frameshift_variant	OTHER	TRUE	FALSE	9	2	11	9,2	1	Insertion	0.181818
N2	2	I	14718446	T	G	Y54E5A.8	MODERATE	missense_variant	MISSENSE	FALSE	FALSE	9	2	11	9,2	1	SNP	0.181818
N2	2	I	14718447	T	G	Y54E5A.8	LOW	synonymous_variant	SILENT	FALSE	FALSE	9	2	11	9,2	1	SNP	0.181818
N2	2	I	14745064	C	CA	K05C4.5	HIGH	frameshift_variant	OTHER	TRUE	FALSE	44	9	53	44,9	1	Insertion	0.169811
N2	2	I	14759927	C	G	rps-26	LOW	5_prime_UTR_premature_start_codon_gain_variant	OTHER	FALSE	FALSE	3	52	55	3,52	2	SNP	0.945455
N2	2	I	14815319	G	A	smp-1	MODERATE	missense_variant	MISSENSE	FALSE	FALSE	14	2	16	14,2	1	SNP	0.125
N2	2	I	14817304	A	AT	Y54E5B.2	HIGH	frameshift_variant	OTHER	TRUE	FALSE	15	3	18	15,3	1	Insertion	0.166667
N2	2	I	14840406	G	GA	F32A7.4	HIGH	frameshift_variant	OTHER	TRUE	FALSE	97	22	119	97,22	1	Insertion	0.184874
N2	2	I	14840506	G	GA	F32A7.4	HIGH	frameshift_variant	OTHER	TRUE	FALSE	40	6	46	40,6	1	Insertion	0.130435
N2	2	I	15013320	C	CT	pole-1	HIGH	frameshift_variant	OTHER	TRUE	FALSE	71	18	89	71,18	1	Insertion	0.202247
N2	2	I	15013689	C	CT	pole-1	HIGH	frameshift_variant	OTHER	FALSE	FALSE	55	10	65	55,10	1	Insertion	0.153846
N2	2	I	15022261	G	GT	dog-1	HIGH	frameshift_variant	OTHER	TRUE	FALSE	16	5	21	16,5	1	Insertion	0.238095
N2	2	I	15025036	G	GA	F33H2.2	HIGH	frameshift_variant	OTHER	TRUE	FALSE	18	3	21	18,3	1	Insertion	0.142857
N2	2	II	31363	A	AT	F23F1.5	HIGH	frameshift_variant	OTHER	TRUE	FALSE	18	5	23	18,5	1	Insertion	0.217391
N2	2	II	44313	G	GA	nfyc-1	HIGH	frameshift_variant	OTHER	TRUE	FALSE	34	9	43	34,9	1	Insertion	0.209302
N2	2	II	44619	C	CA	nfyc-1	HIGH	frameshift_variant	OTHER	TRUE	FALSE	23	5	28	23,5	1	Insertion	0.178571
N2	2	II	57209	C	CA	sptl-1	HIGH	frameshift_variant	OTHER	TRUE	FALSE	70	12	82	70,12	1	Insertion	0.146341
N2	2	II	94480	C	CT	C50D2.7	HIGH	frameshift_variant	OTHER	TRUE	FALSE	36	6	42	36,6	1	Insertion	0.142857
N2	2	II	197954	T	G	chs-2	MODERATE	missense_variant	MISSENSE	FALSE	FALSE	10	2	12	10,2	1	SNP	0.166667
N2	2	II	197956	G	C	chs-2	MODERATE	missense_variant	MISSENSE	FALSE	FALSE	10	2	12	10,2	1	SNP	0.166667
N2	2	II	286839	G	GA	misc-1	HIGH	frameshift_variant	OTHER	TRUE	FALSE	53	10	63	53,10	1	Insertion	0.15873
N2	2	II	389926	G	GA	nstp-4	HIGH	frameshift_variant	OTHER	TRUE	FALSE	15	4	19	15,4	1	Insertion	0.210526
N2	2	II	407839	C	CT	dnsn-1	HIGH	frameshift_variant	OTHER	TRUE	FALSE	27	8	35	27,8	1	Insertion	0.228571
N2	2	II	471571	G	GT	nol-2	HIGH	frameshift_variant	OTHER	TRUE	FALSE	19	7	26	19,7	1	Insertion	0.269231
N2	2	II	1099644	C	CT	pho-14	HIGH	frameshift_variant	OTHER	TRUE	FALSE	16	5	21	16,5	1	Insertion	0.238095
N2	2	II	1126581	C	CA	eri-3	HIGH	frameshift_variant	OTHER	TRUE	FALSE	14	8	22	14,8	1	Insertion	0.363636
N2	2	II	1133201	C	CT	W09B6.4	HIGH	frameshift_variant	OTHER	TRUE	FALSE	21	4	25	21,4	1	Insertion	0.16
N2	2	II	1133841	G	GA	W09B6.4	HIGH	frameshift_variant	OTHER	TRUE	FALSE	11	3	14	11,3	1	Insertion	0.214286
N2	2	II	1371671	T	C	rog-1	LOW	synonymous_variant	SILENT	FALSE	FALSE	12	3	15	12,3	1	SNP	0.2
N2	2	II	1403763	C	CA	cogc-4	HIGH	frameshift_variant	OTHER	TRUE	FALSE	56	8	64	56,8	1	Insertion	0.125
N2	2	II	1419753	A	G	alkb-1	LOW	synonymous_variant	SILENT	FALSE	FALSE	17	2	19	17,2	1	SNP	0.105263
N2	2	II	1419755	T	A	alkb-1	MODERATE	missense_variant	MISSENSE	FALSE	FALSE	17	2	19	17,2	1	SNP	0.105263
N2	2	II	1419937	T	C	alkb-1	MODERATE	missense_variant	MISSENSE	FALSE	FALSE	12	2	14	12,2	1	SNP	0.142857
N2	2	II	1419948	T	A	alkb-1	MODERATE	missense_variant	MISSENSE	FALSE	FALSE	10	2	12	10,2	1	SNP	0.166667
N2	2	II	1437361	G	GT	nol-6	HIGH	frameshift_variant	OTHER	FALSE	FALSE	9	2	11	9,2	1	Insertion	0.181818
N2	2	II	1773861	G	GT	math-26	HIGH	frameshift_variant	OTHER	TRUE	FALSE	11	3	14	11,3	1	Insertion	0.214286
N2	2	II	1777541	G	GT	math-3	HIGH	frameshift_variant	OTHER	TRUE	FALSE	17	3	20	17,3	1	Insertion	0.15
N2	2	II	1917637	G	GT	bath-4	HIGH	frameshift_variant	OTHER	TRUE	FALSE	9	2	11	9,2	1	Insertion	0.181818
N2	2	II	2030162	G	GT	bath-3	HIGH	frameshift_variant	OTHER	TRUE	FALSE	8	2	10	8,2	1	Insertion	0.2
N2	2	II	2054036	C	CT	F07E5.5	HIGH	frameshift_variant	OTHER	FALSE	FALSE	14	6	20	14,6	1	Insertion	0.3
N2	2	II	2235602	C	CA	cct-3	HIGH	frameshift_variant	OTHER	TRUE	FALSE	60	14	74	60,14	1	Insertion	0.189189
N2	2	II	2243714	C	CA	F54A3.2	HIGH	frameshift_variant	OTHER	FALSE	FALSE	17	4	21	17,4	1	Insertion	0.190476
N2	2	II	2246861	C	CA	F54A3.2	HIGH	frameshift_variant	OTHER	TRUE	FALSE	20	4	24	20,4	1	Insertion	0.166667
N2	2	II	2249319	C	CA	F54A3.2	HIGH	frameshift_variant	OTHER	TRUE	FALSE	32	9	41	32,9	1	Insertion	0.219512
N2	2	II	2281535	C	CT	K09F6.9	HIGH	frameshift_variant	OTHER	TRUE	FALSE	8	2	10	8,2	1	Insertion	0.2
N2	2	II	2282052	C	CT	K09F6.9	HIGH	frameshift_variant	OTHER	TRUE	FALSE	14	3	17	14,3	1	Insertion	0.176471
N2	2	II	2328857	C	CT	ZK1240.8	HIGH	frameshift_variant	OTHER	TRUE	FALSE	9	4	13	9,4	1	Insertion	0.307692
N2	2	II	2676614	G	GAA	F22E5.1	HIGH	frameshift_variant	OTHER	TRUE	FALSE	15	2	17	15,2	1	Insertion	0.117647
N2	2	II	2791898	C	CA	srpa-72	HIGH	frameshift_variant	OTHER	TRUE	FALSE	58	9	67	58,9	1	Insertion	0.134328
N2	2	II	3078962	G	GA	copb-1	HIGH	frameshift_variant	OTHER	TRUE	FALSE	8	2	10	8,2	1	Insertion	0.2
N2	2	II	3360262	C	CA	bath-27	HIGH	frameshift_variant	OTHER	TRUE	FALSE	8	2	10	8,2	1	Insertion	0.2
N2	2	II	3453078	C	CA	C16C8.12	HIGH	frameshift_variant	OTHER	TRUE	FALSE	27	11	38	27,11	1	Insertion	0.289474
N2	2	II	3486716	C	CA	smu-2	HIGH	frameshift_variant	OTHER	TRUE	FALSE	80	14	94	80,14	1	Insertion	0.148936
N2	2	II	3503490	G	GA	Y49F6B.2	HIGH	frameshift_variant	OTHER	TRUE	FALSE	20	5	25	20,5	1	Insertion	0.2
N2	2	II	3519125	T	C	W09G10.t3	LOW	synonymous_variant	SILENT	FALSE	FALSE	61	8	69	61,8	1	SNP	0.115942
N2	2	II	3535358	A	AT	apd-3	HIGH	frameshift_variant	OTHER	TRUE	FALSE	29	5	34	29,5	1	Insertion	0.147059
N2	2	II	3677658	T	G	F19B10.10	MODERATE	missense_variant	MISSENSE	FALSE	FALSE	15	2	17	15,2	1	SNP	0.117647
N2	2	II	3677664	A	G	F19B10.10	LOW	synonymous_variant	SILENT	FALSE	FALSE	15	2	17	15,2	1	SNP	0.117647
N2	2	II	3965264	C	A	sea-2	MODERATE	missense_variant	MISSENSE	FALSE	FALSE	16	2	18	16,2	1	SNP	0.111111
N2	2	II	3965267	G	A	sea-2	MODERATE	missense_variant	MISSENSE	FALSE	FALSE	17	2	19	17,2	1	SNP	0.105263
N2	2	II	3965269	T	A	sea-2	LOW	synonymous_variant	SILENT	FALSE	FALSE	17	2	19	17,2	1	SNP	0.105263
N2	2	II	3965270	G	A	sea-2	MODERATE	missense_variant	MISSENSE	FALSE	FALSE	17	2	19	17,2	1	SNP	0.105263
N2	2	II	3965271	CT	C	sea-2	HIGH	frameshift_variant	OTHER	TRUE	FALSE	16	2	18	16,2	1	Deletion	0.111111
N2	2	II	3965465	C	CA	sea-2	HIGH	frameshift_variant	OTHER	TRUE	FALSE	14	3	17	14,3	1	Insertion	0.176471
N2	2	II	4187499	GAC	G	cpna-1	HIGH	frameshift_variant	OTHER	TRUE	FALSE	13	2	15	13,2	1	Deletion	0.133333
N2	2	II	4302303	G	GA	gtf-2F1	HIGH	frameshift_variant	OTHER	TRUE	FALSE	137	16	153	137,16	1	Insertion	0.104575
N2	2	II	4342221	C	CA	athp-2	HIGH	frameshift_variant	OTHER	TRUE	FALSE	16	5	21	16,5	1	Insertion	0.238095
N2	2	II	4470740	T	C	W06B4.2	MODERATE	missense_variant	MISSENSE	FALSE	FALSE	12	2	14	12,2	1	SNP	0.142857
N2	2	II	4592639	C	CT	ipla-1	HIGH	frameshift_variant	OTHER	TRUE	FALSE	40	6	46	40,6	1	Insertion	0.130435
N2	2	II	4630611	C	T	che-10	MODERATE	missense_variant	MISSENSE	FALSE	FALSE	11	2	13	11,2	1	SNP	0.153846
N2	2	II	4719115	A	AT	F10G7.10	HIGH	frameshift_variant	OTHER	TRUE	FALSE	12	3	15	12,3	1	Insertion	0.2
N2	2	II	4737645	C	G	F41C3.5	LOW	5_prime_UTR_premature_start_codon_gain_variant	OTHER	FALSE	FALSE	8	12	20	8,12	1	SNP	0.6
N2	2	II	4754239	G	GA	C27D9.1	HIGH	frameshift_variant	OTHER	TRUE	FALSE	31	11	42	31,11	1	Insertion	0.261905
N2	2	II	4795363	C	T	F26G1.1	LOW	synonymous_variant	SILENT	FALSE	FALSE	9	2	11	9,2	1	SNP	0.181818
N2	2	II	4829699	G	T	tbck-1	MODERATE	missense_variant	MISSENSE	FALSE	FALSE	16	2	18	16,2	1	SNP	0.111111
N2	2	II	4829700	C	T	tbck-1	MODERATE	missense_variant	MISSENSE	FALSE	FALSE	16	2	18	16,2	1	SNP	0.111111
N2	2	II	4858554	T	C	F11G11.5	LOW	synonymous_variant	SILENT	FALSE	FALSE	23	10	33	23,10	1	SNP	0.30303
N2	2	II	4870720	A	AT	col-20	HIGH	frameshift_variant	OTHER	TRUE	FALSE	37	6	43	37,6	1	Insertion	0.139535
N2	2	II	4912462	C	CT	R05F9.11	HIGH	frameshift_variant	OTHER	TRUE	FALSE	13	4	17	13,4	1	Insertion	0.235294
N2	2	II	4954156	C	CA	ndx-3	HIGH	frameshift_variant	OTHER	TRUE	FALSE	10	3	13	10,3	1	Insertion	0.230769
N2	2	II	4959763	G	GT	ulp-2	HIGH	frameshift_variant	OTHER	FALSE	FALSE	29	11	40	29,11	1	Insertion	0.275
N2	2	II	5000870	T	TA	F59A6.5	HIGH	frameshift_variant	OTHER	TRUE	FALSE	74	9	83	74,9	1	Insertion	0.108434
N2	2	II	5030073	T	A	F33G12.2	MODERATE	missense_variant	MISSENSE	FALSE	FALSE	11	2	13	11,2	1	SNP	0.153846
N2	2	II	5030075	C	CTT	F33G12.2	HIGH	frameshift_variant	OTHER	TRUE	FALSE	11	2	13	11,2	1	Insertion	0.153846
N2	2	II	5063138	T	TA	smc-5	HIGH	frameshift_variant	OTHER	TRUE	FALSE	174	36	210	174,36	1	Insertion	0.171429
N2	2	II	5065022	G	GT	smc-5	HIGH	frameshift_variant	OTHER	TRUE	FALSE	91	11	102	91,11	1	Insertion	0.107843
N2	2	II	5083009	G	GT	C04G6.4	HIGH	frameshift_variant	OTHER	TRUE	FALSE	16	3	19	16,3	1	Insertion	0.157895
N2	2	II	5231698	C	CA	EGAP2.1	HIGH	frameshift_variant	OTHER	TRUE	FALSE	9	4	13	9,4	1	Insertion	0.307692
N2	2	II	5348119	T	C	F09E5.10	MODERATE	missense_variant	MISSENSE	FALSE	FALSE	5	9	14	5,9	1	SNP	0.642857
N2	2	II	5358758	C	CA	bmy-1	HIGH	frameshift_variant	OTHER	TRUE	FALSE	41	10	51	41,10	1	Insertion	0.196078
N2	2	II	5381258	C	CA	pkc-3	HIGH	frameshift_variant	OTHER	TRUE	FALSE	16	3	19	16,3	1	Insertion	0.157895
N2	2	II	5393846	A	AT	pink-1	HIGH	frameshift_variant	OTHER	TRUE	FALSE	18	3	21	18,3	1	Insertion	0.142857
N2	2	II	5397859	G	GT	EEED8.10	HIGH	frameshift_variant	OTHER	TRUE	FALSE	42	6	48	42,6	1	Insertion	0.125
N2	2	II	5410758	G	GA	EEED8.4	HIGH	frameshift_variant	OTHER	TRUE	FALSE	8	3	11	8,3	1	Insertion	0.272727
N2	2	II	5547004	G	GT	acdh-2	HIGH	frameshift_variant	OTHER	TRUE	FALSE	32	5	37	32,5	1	Insertion	0.135135
N2	2	II	5597515	C	CA	C17G10.1	HIGH	frameshift_variant	OTHER	TRUE	FALSE	88	23	111	88,23	1	Insertion	0.207207
N2	2	II	5628470	C	CA	F59E12.6	HIGH	frameshift_variant	OTHER	TRUE	FALSE	16	6	22	16,6	1	Insertion	0.272727
N2	2	II	5661283	C	CA	mdt-26	HIGH	frameshift_variant	OTHER	TRUE	FALSE	39	6	45	39,6	1	Insertion	0.133333
N2	2	II	5664116	T	TA	mdt-26	HIGH	frameshift_variant	OTHER	TRUE	FALSE	85	19	104	85,19	1	Insertion	0.182692
N2	2	II	5676396	C	CT	C25H3.11	HIGH	frameshift_variant	OTHER	TRUE	FALSE	24	7	31	24,7	1	Insertion	0.225806
N2	2	II	5822166	T	TA	ehs-1	HIGH	frameshift_variant	OTHER	TRUE	FALSE	35	5	40	35,5	1	Insertion	0.125
N2	2	II	5825224	C	CT	tbc-2	HIGH	frameshift_variant	OTHER	TRUE	FALSE	58	9	67	58,9	1	Insertion	0.134328
N2	2	II	5838525	G	GT	ZK1248.15	HIGH	frameshift_variant	OTHER	FALSE	FALSE	23	4	27	23,4	1	Insertion	0.148148
N2	2	II	5868263	G	GT	F55C12.5	HIGH	frameshift_variant	OTHER	TRUE	FALSE	42	11	53	42,11	1	Insertion	0.207547
N2	2	II	5870492	C	CT	F55C12.5	HIGH	frameshift_variant	OTHER	TRUE	FALSE	52	9	61	52,9	1	Insertion	0.147541
N2	2	II	5919138	G	GA	ptp-2	HIGH	frameshift_variant	OTHER	TRUE	FALSE	69	19	88	69,19	1	Insertion	0.215909
N2	2	II	6045056	C	CT	R12C12.5	HIGH	frameshift_variant	OTHER	TRUE	FALSE	32	9	41	32,9	1	Insertion	0.219512
N2	2	II	6047731	G	C	R12C12.6	HIGH	stop_gained	NONSENSE	TRUE	TRUE	14	7	21	14,7	1	SNP	0.333333
N2	2	II	6048529	T	TA	ran-5	HIGH	frameshift_variant	OTHER	TRUE	FALSE	252	52	304	252,52	1	Insertion	0.171053
N2	2	II	6055304	C	CT	R12C12.7	HIGH	frameshift_variant	OTHER	TRUE	FALSE	19	6	25	19,6	1	Insertion	0.24
N2	2	II	6055905	A	AT	R12C12.7	HIGH	frameshift_variant	OTHER	TRUE	FALSE	99	14	113	99,14	1	Insertion	0.123894
N2	2	II	6278983	C	CA	bpl-1	HIGH	frameshift_variant	OTHER	TRUE	FALSE	12	3	15	12,3	1	Insertion	0.2
N2	2	II	6362916	C	A	ani-2	MODERATE	missense_variant	MISSENSE	FALSE	FALSE	102	16	118	102,16	1	SNP	0.135593
N2	2	II	6371910	G	GA	lin-23	HIGH	frameshift_variant	OTHER	TRUE	FALSE	22	5	27	22,5	1	Insertion	0.185185
N2	2	II	6518811	C	CT	toe-2	HIGH	frameshift_variant	OTHER	TRUE	FALSE	62	24	86	62,24	1	Insertion	0.27907
N2	2	II	6536430	C	CA	utp-20	HIGH	frameshift_variant	OTHER	FALSE	FALSE	21	9	30	21,9	1	Insertion	0.3
N2	2	II	6589833	G	GA	vps-32.1	HIGH	frameshift_variant	OTHER	TRUE	FALSE	83	11	94	83,11	1	Insertion	0.117021
N2	2	II	6596314	C	CT	dnj-8	HIGH	frameshift_variant	OTHER	TRUE	FALSE	94	37	131	94,37	1	Insertion	0.282443
N2	2	II	6854069	C	CA	dnj-5	HIGH	frameshift_variant	OTHER	FALSE	FALSE	53	7	60	53,7	1	Insertion	0.116667
N2	2	II	6881578	CT	C	pmp-1	HIGH	frameshift_variant	OTHER	TRUE	FALSE	12	2	14	12,2	1	Deletion	0.142857
N2	2	II	6889240	C	CT	acer-1	HIGH	frameshift_variant	OTHER	TRUE	FALSE	52	8	60	52,8	1	Insertion	0.133333
N2	2	II	6901051	G	GA	hrpl-1	HIGH	frameshift_variant	OTHER	TRUE	FALSE	11	4	15	11,4	1	Insertion	0.266667
N2	2	II	6946434	T	C	flcn-1	LOW	synonymous_variant	SILENT	FALSE	FALSE	12	2	14	12,2	1	SNP	0.142857
N2	2	II	6963801	C	CA	tra-2	HIGH	frameshift_variant	OTHER	TRUE	FALSE	9	2	11	9,2	1	Insertion	0.181818
N2	2	II	6964565	G	GT	tra-2	HIGH	frameshift_variant	OTHER	TRUE	FALSE	7	3	10	7,3	1	Insertion	0.3
N2	2	II	7014561	C	CT	lst-6	HIGH	frameshift_variant	OTHER	TRUE	FALSE	53	10	63	53,10	1	Insertion	0.15873
N2	2	II	7044119	G	GA	ZK1127.6	HIGH	frameshift_variant	OTHER	TRUE	FALSE	81	11	92	81,11	1	Insertion	0.119565
N2	2	II	7047726	C	CT	tcer-1	HIGH	frameshift_variant	OTHER	TRUE	FALSE	79	13	92	79,13	1	Insertion	0.141304
N2	2	II	7068799	C	CT	him-14	HIGH	frameshift_variant	OTHER	TRUE	FALSE	12	8	20	12,8	1	Insertion	0.4
N2	2	II	7075143	C	CA	kat-1	HIGH	frameshift_variant	OTHER	TRUE	FALSE	328	46	374	328,46	1	Insertion	0.122995
N2	2	II	7075635	T	TA	T02G5.7	HIGH	frameshift_variant	OTHER	FALSE	FALSE	25	4	29	25,4	1	Insertion	0.137931
N2	2	II	7100079	A	AT	mmaa-1	HIGH	frameshift_variant	OTHER	TRUE	FALSE	31	6	37	31,6	1	Insertion	0.162162
N2	2	II	7103064	C	CT	farl-11	HIGH	frameshift_variant	OTHER	TRUE	FALSE	23	14	37	23,14	1	Insertion	0.378378
N2	2	II	7104459	A	AT	farl-11	HIGH	frameshift_variant	OTHER	TRUE	FALSE	96	16	112	96,16	1	Insertion	0.142857
N2	2	II	7105560	C	G	rpl-33	LOW	5_prime_UTR_premature_start_codon_gain_variant	OTHER	FALSE	FALSE	2	43	45	2,43	2	SNP	0.955556
N2	2	II	7123998	A	G	F10E7.2	MODERATE	missense_variant	MISSENSE	FALSE	FALSE	22	13	35	22,13	1	SNP	0.371429
N2	2	II	7152969	T	A	fust-1	MODERATE	missense_variant	MISSENSE	FALSE	FALSE	54	39	93	54,39	1	SNP	0.419355
N2	2	II	7152970	A	T	fust-1	MODERATE	missense_variant	MISSENSE	FALSE	FALSE	54	39	93	54,39	1	SNP	0.419355
N2	2	II	7152994	C	A	fust-1	MODERATE	missense_variant	MISSENSE	FALSE	FALSE	58	24	82	58,24	1	SNP	0.292683
N2	2	II	7302144	G	GA	cul-4	HIGH	frameshift_variant	OTHER	FALSE	FALSE	27	5	32	27,5	1	Insertion	0.15625
N2	2	II	7364043	G	C	msra-1	LOW	5_prime_UTR_premature_start_codon_gain_variant	OTHER	FALSE	FALSE	4	8	12	4,8	1	SNP	0.666667
N2	2	II	7478088	C	CT	aka-1	HIGH	frameshift_variant	OTHER	TRUE	FALSE	163	28	191	163,28	1	Insertion	0.146597
N2	2	II	7480086	T	TA	ubc-6	HIGH	frameshift_variant	OTHER	TRUE	FALSE	104	19	123	104,19	1	Insertion	0.154472
N2	2	II	7602960	G	GA	npp-21	HIGH	frameshift_variant	OTHER	TRUE	FALSE	54	8	62	54,8	1	Insertion	0.129032
N2	2	II	7659921	C	CA	alfa-1	HIGH	frameshift_variant	OTHER	TRUE	FALSE	20	5	25	20,5	1	Insertion	0.2
N2	2	II	7668612	G	GA	lir-2	HIGH	frameshift_variant	OTHER	TRUE	FALSE	44	9	53	44,9	1	Insertion	0.169811
N2	2	II	7683329	G	GA	lin-26	HIGH	frameshift_variant	OTHER	TRUE	FALSE	103	14	117	103,14	1	Insertion	0.119658
N2	2	II	7728150	G	GA	cpna-2	HIGH	frameshift_variant	OTHER	TRUE	FALSE	31	5	36	31,5	1	Insertion	0.138889
N2	2	II	7729157	C	CA	cpna-2	HIGH	frameshift_variant	OTHER	TRUE	FALSE	117	18	135	117,18	1	Insertion	0.133333
N2	2	II	7737198	G	GA	cpna-2	HIGH	frameshift_variant	OTHER	TRUE	FALSE	13	3	16	13,3	1	Insertion	0.1875
N2	2	II	7739478	T	C	cpna-2	MODERATE	missense_variant	MISSENSE	FALSE	FALSE	13	4	17	13,4	1	SNP	0.235294
N2	2	II	7739481	T	C	cpna-2	MODERATE	missense_variant	MISSENSE	FALSE	FALSE	13	4	17	13,4	1	SNP	0.235294
N2	2	II	7740929	T	TA	cpna-2	HIGH	frameshift_variant	OTHER	TRUE	FALSE	39	7	46	39,7	1	Insertion	0.152174
N2	2	II	7857076	C	CT	cec-3	HIGH	frameshift_variant	OTHER	TRUE	FALSE	43	9	52	43,9	1	Insertion	0.173077
N2	2	II	7873398	C	CT	T01H3.3	HIGH	frameshift_variant	OTHER	TRUE	FALSE	50	11	61	50,11	1	Insertion	0.180328
N2	2	II	7896835	T	TA	ptc-1	HIGH	frameshift_variant	OTHER	TRUE	FALSE	220	28	248	220,28	1	Insertion	0.112903
N2	2	II	8024519	C	CT	swsn-7	HIGH	frameshift_variant	OTHER	TRUE	FALSE	143	24	167	143,24	1	Insertion	0.143713
N2	2	II	8046092	G	GA	T05H10.1	HIGH	frameshift_variant	OTHER	TRUE	FALSE	55	8	63	55,8	1	Insertion	0.126984
N2	2	II	8054470	C	CA	T05H10.4	HIGH	frameshift_variant	OTHER	TRUE	FALSE	20	6	26	20,6	1	Insertion	0.230769
N2	2	II	8065667	T	TA	ufd-2	HIGH	frameshift_variant	OTHER	TRUE	FALSE	48	8	56	48,8	1	Insertion	0.142857
N2	2	II	8141531	C	CT	F10B5.8	HIGH	frameshift_variant	OTHER	TRUE	FALSE	25	5	30	25,5	1	Insertion	0.166667
N2	2	II	8168355	C	T	rrf-3	MODERATE	missense_variant	MISSENSE	FALSE	FALSE	12	3	15	12,3	1	SNP	0.2
N2	2	II	8218570	G	GA	ifg-1	HIGH	frameshift_variant	OTHER	TRUE	FALSE	95	14	109	95,14	1	Insertion	0.12844
N2	2	II	8266051	C	CA	K01C8.1	HIGH	frameshift_variant	OTHER	TRUE	FALSE	21	6	27	21,6	1	Insertion	0.222222
N2	2	II	8444405	G	GA	evl-20	HIGH	frameshift_variant	OTHER	TRUE	FALSE	18	6	24	18,6	1	Insertion	0.25
N2	2	II	8444674	C	CA	evl-20	HIGH	frameshift_variant	OTHER	TRUE	FALSE	9	2	11	9,2	1	Insertion	0.181818
N2	2	II	8480862	A	AT	M05D6.5	HIGH	frameshift_variant	OTHER	TRUE	FALSE	11	4	15	11,4	1	Insertion	0.266667
N2	2	II	8580707	G	GA	F54C9.9	HIGH	frameshift_variant	OTHER	TRUE	FALSE	145	23	168	145,23	1	Insertion	0.136905
N2	2	II	8606304	C	CA	suf-1	HIGH	frameshift_variant	OTHER	TRUE	FALSE	63	8	71	63,8	1	Insertion	0.112676
N2	2	II	8607103	G	GT	F28C6.8	HIGH	frameshift_variant	OTHER	TRUE	FALSE	39	9	48	39,9	1	Insertion	0.1875
N2	2	II	8621586	A	AT	T22C8.3	HIGH	frameshift_variant	OTHER	TRUE	FALSE	12	4	16	12,4	1	Insertion	0.25
N2	2	II	8661914	G	GA	eif-2Bepsilon	HIGH	frameshift_variant	OTHER	FALSE	FALSE	12	3	15	12,3	1	Insertion	0.2
N2	2	II	8698146	C	CT	C34C6.4	HIGH	frameshift_variant	OTHER	TRUE	FALSE	15	5	20	15,5	1	Insertion	0.25
N2	2	II	8719103	G	GA	T01B7.5	HIGH	frameshift_variant	OTHER	TRUE	FALSE	69	16	85	69,16	1	Insertion	0.188235
N2	2	II	8772326	C	CA	let-19	HIGH	frameshift_variant	OTHER	TRUE	FALSE	75	10	85	75,10	1	Insertion	0.117647
N2	2	II	8904375	G	GA	lat-1	HIGH	frameshift_variant	OTHER	TRUE	FALSE	28	4	32	28,4	1	Insertion	0.125
N2	2	II	8940245	CT	C	set-17	HIGH	frameshift_variant	OTHER	TRUE	FALSE	12	2	14	12,2	1	Deletion	0.142857
N2	2	II	8941550	A	AT	T21B10.4	HIGH	frameshift_variant	OTHER	TRUE	FALSE	48	7	55	48,7	1	Insertion	0.127273
N2	2	II	8965634	G	GA	C18E9.2	HIGH	frameshift_variant	OTHER	TRUE	FALSE	81	12	93	81,12	1	Insertion	0.129032
N2	2	II	9050060	G	GT	T24B8.7	HIGH	frameshift_variant	OTHER	TRUE	FALSE	45	7	52	45,7	1	Insertion	0.134615
N2	2	II	9057088	G	T	rpl-32	LOW	5_prime_UTR_premature_start_codon_gain_variant	OTHER	FALSE	FALSE	0	11	23	0,11,12	1,1	SNP	0.478261
N2	2	II	9057089	A	C	rpl-32	LOW	5_prime_UTR_premature_start_codon_gain_variant	OTHER	FALSE	FALSE	12	11	23	12,11	1	SNP	0.478261
N2	2	II	9095034	C	CT	clh-5	HIGH	frameshift_variant	OTHER	FALSE	FALSE	15	6	21	15,6	1	Insertion	0.285714
N2	2	II	9097425	G	GT	clh-5	HIGH	frameshift_variant	OTHER	TRUE	FALSE	8	3	11	8,3	1	Insertion	0.272727
N2	2	II	9167200	G	GT	T23G7.3	HIGH	frameshift_variant	OTHER	TRUE	FALSE	140	22	162	140,22	1	Insertion	0.135802
N2	2	II	9167659	C	CT	T23G7.3	HIGH	frameshift_variant	OTHER	TRUE	FALSE	87	11	98	87,11	1	Insertion	0.112245
N2	2	II	9245298	G	GT	T26C5.3	HIGH	frameshift_variant	OTHER	TRUE	FALSE	54	11	65	54,11	1	Insertion	0.169231
N2	2	II	9337221	G	GT	scp-1	HIGH	frameshift_variant	OTHER	TRUE	FALSE	50	8	58	50,8	1	Insertion	0.137931
N2	2	II	9343254	G	GT	F42A8.1	HIGH	frameshift_variant	OTHER	TRUE	FALSE	74	20	94	74,20	1	Insertion	0.212766
N2	2	II	9362285	G	GA	mel-11	HIGH	frameshift_variant	OTHER	TRUE	FALSE	76	16	92	76,16	1	Insertion	0.173913
N2	2	II	9644114	G	GT	fzr-1	HIGH	frameshift_variant	OTHER	TRUE	FALSE	19	5	24	19,5	1	Insertion	0.208333
N2	2	II	9749457	C	CA	nos-3	HIGH	frameshift_variant	OTHER	TRUE	FALSE	99	19	118	99,19	1	Insertion	0.161017
N2	2	II	9768600	A	AT	aqp-10	HIGH	frameshift_variant	OTHER	FALSE	FALSE	8	2	10	8,2	1	Insertion	0.2
N2	2	II	9773013	A	G	ZK1321.4	MODERATE	missense_variant	MISSENSE	FALSE	FALSE	13	2	15	13,2	1	SNP	0.133333
N2	2	II	9927575	G	GA	C05C10.2	HIGH	frameshift_variant	OTHER	TRUE	FALSE	13	3	16	13,3	1	Insertion	0.1875
N2	2	II	9940972	C	CA	ufd-3	HIGH	frameshift_variant	OTHER	TRUE	FALSE	61	12	73	61,12	1	Insertion	0.164384
N2	2	II	10015386	C	CT	lec-2	HIGH	frameshift_variant	OTHER	TRUE	FALSE	17	3	20	17,3	1	Insertion	0.15
N2	2	II	10100666	G	GA	puf-12	HIGH	frameshift_variant	OTHER	TRUE	FALSE	81	18	99	81,18	1	Insertion	0.181818
N2	2	II	10174222	C	CA	F33H1.3	HIGH	frameshift_variant	OTHER	FALSE	FALSE	7	4	11	7,4	1	Insertion	0.363636
N2	2	II	10243734	G	GT	nrde-2	HIGH	frameshift_variant	OTHER	TRUE	FALSE	9	4	13	9,4	1	Insertion	0.307692
N2	2	II	10245925	C	CT	nrde-2	HIGH	frameshift_variant	OTHER	TRUE	FALSE	9	2	11	9,2	1	Insertion	0.181818
N2	2	II	10264597	T	TA	F54B3.1	HIGH	frameshift_variant	OTHER	TRUE	FALSE	14	5	19	14,5	1	Insertion	0.263158
N2	2	II	10580434	G	GA	dohh-1	HIGH	frameshift_variant	OTHER	TRUE	FALSE	27	6	33	27,6	1	Insertion	0.181818
N2	2	II	10587052	G	GA	algn-9	HIGH	frameshift_variant	OTHER	TRUE	FALSE	38	8	46	38,8	1	Insertion	0.173913
N2	2	II	10591629	C	CAA	crn-3	HIGH	frameshift_variant	OTHER	TRUE	FALSE	21	4	25	21,4	1	Insertion	0.16
N2	2	II	10783193	C	CT	ect-2	HIGH	frameshift_variant	OTHER	FALSE	FALSE	40	8	48	40,8	1	Insertion	0.166667
N2	2	II	10790371	C	CT	vps-11	HIGH	frameshift_variant	OTHER	TRUE	FALSE	9	3	12	9,3	1	Insertion	0.25
N2	2	II	10822088	C	CA	ech-4	HIGH	frameshift_variant	OTHER	TRUE	FALSE	8	3	11	8,3	1	Insertion	0.272727
N2	2	II	10825369	G	GA	mix-1	HIGH	frameshift_variant	OTHER	TRUE	FALSE	87	14	101	87,14	1	Insertion	0.138614
N2	2	II	10840170	G	GA	mix-1	HIGH	frameshift_variant	OTHER	TRUE	FALSE	22	5	27	22,5	1	Insertion	0.185185
N2	2	II	10860897	G	C	M106.3	MODERATE	missense_variant	MISSENSE	FALSE	FALSE	12	3	15	12,3	1	SNP	0.2
N2	2	II	10870999	C	CT	cyn-4	HIGH	frameshift_variant	OTHER	TRUE	FALSE	66	12	78	66,12	1	Insertion	0.153846
N2	2	II	10871935	C	CT	cyn-4	HIGH	frameshift_variant	OTHER	TRUE	FALSE	28	4	32	28,4	1	Insertion	0.125
N2	2	II	11027640	C	T	let-858	LOW	synonymous_variant	SILENT	FALSE	FALSE	233	41	274	233,41	1	SNP	0.149635
N2	2	II	11027673	T	G	let-858	LOW	synonymous_variant	SILENT	FALSE	FALSE	157	52	209	157,52	1	SNP	0.248804
N2	2	II	11027682	A	T	let-858	LOW	synonymous_variant	SILENT	FALSE	FALSE	136	51	187	136,51	1	SNP	0.272727
N2	2	II	11027692	C	A	let-858	MODERATE	missense_variant	MISSENSE	FALSE	FALSE	148	47	195	148,47	1	SNP	0.241026
N2	2	II	11108483	C	CA	apc-17	HIGH	frameshift_variant	OTHER	TRUE	FALSE	22	5	27	22,5	1	Insertion	0.185185
N2	2	II	11131180	A	AT	F40F8.11	HIGH	frameshift_variant	OTHER	TRUE	FALSE	57	8	65	57,8	1	Insertion	0.123077
N2	2	II	11211969	C	T	srap-1	LOW	synonymous_variant	SILENT	FALSE	FALSE	25	9	34	25,9	1	SNP	0.264706
N2	2	II	11345209	C	CT	B0491.5	HIGH	frameshift_variant	OTHER	TRUE	FALSE	91	15	106	91,15	1	Insertion	0.141509
N2	2	II	11444372	C	CA	adbp-1	HIGH	frameshift_variant	OTHER	TRUE	FALSE	49	8	57	49,8	1	Insertion	0.140351
N2	2	II	11449954	T	TC	W02B12.1	HIGH	frameshift_variant	OTHER	TRUE	FALSE	12	2	14	12,2	1	Insertion	0.142857
N2	2	II	11461731	A	AT	aars-1	HIGH	frameshift_variant	OTHER	TRUE	FALSE	16	3	19	16,3	1	Insertion	0.157895
N2	2	II	11464973	TG	T	rga-1	HIGH	frameshift_variant	OTHER	TRUE	FALSE	11	2	13	11,2	1	Deletion	0.153846
N2	2	II	11472372	C	CT	W02B12.10	HIGH	frameshift_variant	OTHER	TRUE	FALSE	36	7	43	36,7	1	Insertion	0.162791
N2	2	II	11473134	A	AT	W02B12.10	HIGH	frameshift_variant	OTHER	TRUE	FALSE	15	5	20	15,5	1	Insertion	0.25
N2	2	II	11495004	C	CT	ooc-3	HIGH	frameshift_variant	OTHER	TRUE	FALSE	41	10	51	41,10	1	Insertion	0.196078
N2	2	II	11496319	C	CA	B0334.4	HIGH	frameshift_variant	OTHER	TRUE	FALSE	108	15	123	108,15	1	Insertion	0.121951
N2	2	II	11545698	C	G	dnj-13	LOW	5_prime_UTR_premature_start_codon_gain_variant	OTHER	FALSE	FALSE	55	25	80	55,25	1	SNP	0.3125
N2	2	II	11578809	G	GA	smc-6	HIGH	frameshift_variant	OTHER	FALSE	FALSE	37	10	47	37,10	1	Insertion	0.212766
N2	2	II	11586933	T	TA	D1043.1	HIGH	frameshift_variant	OTHER	TRUE	FALSE	18	3	21	18,3	1	Insertion	0.142857
N2	2	II	11629339	C	CT	din-1	HIGH	frameshift_variant	OTHER	TRUE	FALSE	18	3	21	18,3	1	Insertion	0.142857
N2	2	II	11698147	C	CA	xpf-1	HIGH	frameshift_variant	OTHER	TRUE	FALSE	149	20	169	149,20	1	Insertion	0.118343
N2	2	II	11777903	C	CT	patr-1	HIGH	frameshift_variant	OTHER	FALSE	FALSE	21	5	26	21,5	1	Insertion	0.192308
N2	2	II	11780073	C	CA	dna-2	HIGH	frameshift_variant	OTHER	TRUE	FALSE	60	10	70	60,10	1	Insertion	0.142857
N2	2	II	11874339	A	AT	npp-3	HIGH	frameshift_variant	OTHER	TRUE	FALSE	31	10	41	31,10	1	Insertion	0.243902
N2	2	II	11966546	A	C	rab-7	LOW	synonymous_variant	SILENT	FALSE	FALSE	13	7	20	13,7	1	SNP	0.35
N2	2	II	12107432	G	GT	Y17G7B.18	HIGH	frameshift_variant	OTHER	TRUE	FALSE	13	4	17	13,4	1	Insertion	0.235294
N2	2	II	12159955	C	CA	Y57A10A.7	HIGH	frameshift_variant	OTHER	TRUE	FALSE	9	2	11	9,2	1	Insertion	0.181818
N2	2	II	12226561	G	GA	rsr-2	HIGH	frameshift_variant	OTHER	TRUE	FALSE	51	7	58	51,7	1	Insertion	0.12069
N2	2	II	12276551	C	CT	tric-1B.2	HIGH	frameshift_variant	OTHER	TRUE	FALSE	42	6	48	42,6	1	Insertion	0.125
N2	2	II	12520306	C	CA	ceh-99	HIGH	frameshift_variant	OTHER	TRUE	FALSE	9	2	11	9,2	1	Insertion	0.181818
N2	2	II	12593383	A	AT	ceh-100	HIGH	frameshift_variant	OTHER	TRUE	FALSE	25	5	30	25,5	1	Insertion	0.166667
N2	2	II	12603476	G	GA	ceh-100	HIGH	frameshift_variant	OTHER	FALSE	FALSE	35	6	41	35,6	1	Insertion	0.146341
N2	2	II	12673635	G	GT	Y38E10A.22	HIGH	frameshift_variant	OTHER	TRUE	FALSE	108	14	122	108,14	1	Insertion	0.114754
N2	2	II	13085589	G	A	gcn-2	MODERATE	missense_variant	MISSENSE	FALSE	FALSE	16	3	19	16,3	1	SNP	0.157895
N2	2	II	13155731	C	CT	hpr-17	HIGH	frameshift_variant	OTHER	TRUE	FALSE	21	4	25	21,4	1	Insertion	0.16
N2	2	II	13186638	C	CT	mecr-1	HIGH	frameshift_variant	OTHER	TRUE	FALSE	35	9	44	35,9	1	Insertion	0.204545
N2	2	II	13282702	C	CT	ztf-22	HIGH	frameshift_variant	OTHER	TRUE	FALSE	16	7	23	16,7	1	Insertion	0.304348
N2	2	II	13393429	C	CA	Y48C3A.14	HIGH	frameshift_variant	OTHER	TRUE	FALSE	11	3	14	11,3	1	Insertion	0.214286
N2	2	II	13420407	G	GA	Y48E1C.1	HIGH	frameshift_variant	OTHER	TRUE	FALSE	14	3	17	14,3	1	Insertion	0.176471
N2	2	II	13434247	C	CT	Y48E1C.4	HIGH	frameshift_variant	OTHER	TRUE	FALSE	119	15	134	119,15	1	Insertion	0.11194
N2	2	II	13473045	T	C	E01G4.5	MODERATE	missense_variant	MISSENSE	FALSE	FALSE	8	2	10	8,2	1	SNP	0.2
N2	2	II	13473046	T	G	E01G4.5	MODERATE	missense_variant	MISSENSE	FALSE	FALSE	8	2	10	8,2	1	SNP	0.2
N2	2	II	13540004	C	CT	Y48E1B.17	HIGH	frameshift_variant	OTHER	FALSE	FALSE	14	8	22	14,8	1	Insertion	0.363636
N2	2	II	13584016	G	GA	lin-38	HIGH	frameshift_variant	OTHER	TRUE	FALSE	52	9	61	52,9	1	Insertion	0.147541
N2	2	II	13693906	C	CT	rpoa-1	HIGH	frameshift_variant	OTHER	TRUE	FALSE	81	10	91	81,10	1	Insertion	0.10989
N2	2	II	13818426	A	G	his-15	MODERATE	missense_variant	MISSENSE	FALSE	FALSE	8	2	10	8,2	1	SNP	0.2
N2	2	II	13893756	G	GA	mcd-1	HIGH	frameshift_variant	OTHER	TRUE	FALSE	85	15	100	85,15	1	Insertion	0.15
N2	2	II	14141954	C	CT	cacn-1	HIGH	frameshift_variant	OTHER	TRUE	FALSE	76	20	96	76,20	1	Insertion	0.208333
N2	2	II	14250692	C	G	hmg-1.1	LOW	5_prime_UTR_premature_start_codon_gain_variant	OTHER	FALSE	FALSE	2	23	25	2,23	2	SNP	0.92
N2	2	II	14305951	G	A	ctl-1	LOW	synonymous_variant	SILENT	FALSE	FALSE	8	2	10	8,2	1	SNP	0.2
N2	2	II	14305954	T	A	ctl-1	LOW	synonymous_variant	SILENT	FALSE	FALSE	8	2	10	8,2	1	SNP	0.2
N2	2	II	14305957	G	A	ctl-1	LOW	synonymous_variant	SILENT	FALSE	FALSE	8	2	10	8,2	1	SNP	0.2
N2	2	II	14305958	G	C	ctl-1	MODERATE	missense_variant	MISSENSE	FALSE	FALSE	8	2	10	8,2	1	SNP	0.2
N2	2	II	14305960	T	A	ctl-1	LOW	synonymous_variant	SILENT	FALSE	FALSE	8	2	10	8,2	1	SNP	0.2
N2	2	II	14305963	C	T	ctl-1	LOW	synonymous_variant	SILENT	FALSE	FALSE	8	2	10	8,2	1	SNP	0.2
N2	2	II	14340756	A	AT	ddl-3	HIGH	frameshift_variant	OTHER	TRUE	FALSE	25	4	29	25,4	1	Insertion	0.137931
N2	2	II	14343440	C	CT	ddl-3	HIGH	frameshift_variant	OTHER	TRUE	FALSE	27	7	34	27,7	1	Insertion	0.205882
N2	2	II	14350242	C	T	Y54G11A.11	LOW	synonymous_variant	SILENT	FALSE	FALSE	16	2	18	16,2	1	SNP	0.111111
N2	2	II	14390883	C	CA	nurf-1	HIGH	frameshift_variant	OTHER	FALSE	FALSE	51	7	58	51,7	1	Insertion	0.12069
N2	2	II	14396167	G	GA	nurf-1	HIGH	frameshift_variant	OTHER	TRUE	FALSE	35	6	41	35,6	1	Insertion	0.146341
N2	2	II	14411637	G	GT	dsb-2	HIGH	frameshift_variant	OTHER	TRUE	FALSE	23	7	30	23,7	1	Insertion	0.233333
N2	2	II	14441968	T	TA	smg-8	HIGH	frameshift_variant	OTHER	TRUE	FALSE	20	6	26	20,6	1	Insertion	0.230769
N2	2	II	14487547	C	CT	usp-14	HIGH	frameshift_variant	OTHER	TRUE	FALSE	246	47	293	246,47	1	Insertion	0.16041
N2	2	II	14489988	GT	G	vnut-1	HIGH	frameshift_variant	OTHER	TRUE	FALSE	8	2	10	8,2	1	Deletion	0.2
N2	2	II	14523086	C	T	btb-20	MODERATE	missense_variant	MISSENSE	FALSE	FALSE	7	5	12	7,5	1	SNP	0.416667
N2	2	II	14641573	T	C	atgp-2	LOW	5_prime_UTR_premature_start_codon_gain_variant	OTHER	FALSE	FALSE	29	4	33	29,4	1	SNP	0.121212
N2	2	II	14753878	G	C	tac-1	LOW	5_prime_UTR_premature_start_codon_gain_variant	OTHER	FALSE	FALSE	12	3	15	12,3	1	SNP	0.2
N2	2	II	14770238	T	TA	Y54E2A.4	HIGH	frameshift_variant	OTHER	TRUE	FALSE	14	4	18	14,4	1	Insertion	0.222222
N2	2	II	14858060	C	CA	rbm-28	HIGH	frameshift_variant	OTHER	TRUE	FALSE	51	7	58	51,7	1	Insertion	0.12069
N2	2	II	15097427	G	GA	Y53F4B.21	HIGH	frameshift_variant	OTHER	TRUE	FALSE	16	4	20	16,4	1	Insertion	0.2
N2	2	III	86212	G	GT	attf-3	HIGH	frameshift_variant	OTHER	FALSE	FALSE	17	3	20	17,3	1	Insertion	0.15
N2	2	III	87071	G	GT	F54C4.4	HIGH	frameshift_variant	OTHER	TRUE	FALSE	11	3	14	11,3	1	Insertion	0.214286
N2	2	III	195346	T	A	F40G9.17	MODERATE	missense_variant	MISSENSE	FALSE	FALSE	14	2	16	14,2	1	SNP	0.125
N2	2	III	259351	G	GA	Y50D7A.3	HIGH	frameshift_variant	OTHER	TRUE	FALSE	31	6	37	31,6	1	Insertion	0.162162
N2	2	III	285345	C	CA	taco-1	HIGH	frameshift_variant	OTHER	TRUE	FALSE	39	10	49	39,10	1	Insertion	0.204082
N2	2	III	285465	G	GA	taco-1	HIGH	frameshift_variant	OTHER	TRUE	FALSE	50	8	58	50,8	1	Insertion	0.137931
N2	2	III	338315	C	CT	Y50D7A.8	HIGH	frameshift_variant	OTHER	TRUE	FALSE	29	6	35	29,6	1	Insertion	0.171429
N2	2	III	436025	G	GA	Y55B1BR.2	HIGH	frameshift_variant	OTHER	TRUE	FALSE	13	8	21	13,8	1	Insertion	0.380952
N2	2	III	468540	G	GT	magu-1	HIGH	frameshift_variant	OTHER	TRUE	FALSE	21	4	25	21,4	1	Insertion	0.16
N2	2	III	497687	C	CA	unc-45	HIGH	frameshift_variant	OTHER	TRUE	FALSE	51	9	60	51,9	1	Insertion	0.15
N2	2	III	585662	C	CT	helq-1	HIGH	frameshift_variant	OTHER	TRUE	FALSE	18	3	21	18,3	1	Insertion	0.142857
N2	2	III	595885	C	CT	Y55B1AR.2	HIGH	frameshift_variant	OTHER	TRUE	FALSE	19	9	28	19,9	1	Insertion	0.321429
N2	2	III	618938	C	A	T19C3.4	HIGH	stop_gained	NONSENSE	FALSE	FALSE	11	2	13	11,2	1	SNP	0.153846
N2	2	III	618939	G	A	T19C3.4	LOW	synonymous_variant	SILENT	FALSE	FALSE	11	2	13	11,2	1	SNP	0.153846
N2	2	III	640983	C	CA	tag-267	HIGH	frameshift_variant	OTHER	TRUE	FALSE	29	9	38	29,9	1	Insertion	0.236842
N2	2	III	730039	G	GT	pat-12	HIGH	frameshift_variant	OTHER	TRUE	FALSE	72	14	86	72,14	1	Insertion	0.162791
N2	2	III	776151	C	CT	alh-11	HIGH	frameshift_variant	OTHER	TRUE	FALSE	12	4	16	12,4	1	Insertion	0.25
N2	2	III	800664	C	CA	trpp-11	HIGH	frameshift_variant	OTHER	TRUE	FALSE	29	6	35	29,6	1	Insertion	0.171429
N2	2	III	851788	C	CT	moma-1	HIGH	frameshift_variant	OTHER	TRUE	FALSE	61	18	79	61,18	1	Insertion	0.227848
N2	2	III	855229	ATT	A	tag-51	HIGH	frameshift_variant	OTHER	TRUE	FALSE	11	2	13	11,2	1	Deletion	0.153846
N2	2	III	881286	C	CA	ucr-2.3	HIGH	frameshift_variant	OTHER	TRUE	FALSE	36	6	42	36,6	1	Insertion	0.142857
N2	2	III	1144892	C	CA	smr-1	HIGH	frameshift_variant	OTHER	TRUE	FALSE	38	8	46	38,8	1	Insertion	0.173913
N2	2	III	1196252	C	CT	dss-1	HIGH	frameshift_variant	OTHER	TRUE	FALSE	52	8	60	52,8	1	Insertion	0.133333
N2	2	III	1208422	G	GA	orc-3	HIGH	frameshift_variant	OTHER	TRUE	FALSE	20	6	26	20,6	1	Insertion	0.230769
N2	2	III	1425317	C	CT	Y82E9BR.16	HIGH	frameshift_variant	OTHER	TRUE	FALSE	16	3	19	16,3	1	Insertion	0.157895
N2	2	III	1503878	G	GA	M01G5.1	HIGH	frameshift_variant	OTHER	TRUE	FALSE	11	4	15	11,4	1	Insertion	0.266667
N2	2	III	1563465	G	GA	Y67D2.2	HIGH	frameshift_variant	OTHER	TRUE	FALSE	47	10	57	47,10	1	Insertion	0.175439
N2	2	III	1609590	C	CA	Y22D7AL.9	HIGH	frameshift_variant	OTHER	TRUE	FALSE	8	2	10	8,2	1	Insertion	0.2
N2	2	III	1618932	G	C	Y22D7AL.10	LOW	5_prime_UTR_premature_start_codon_gain_variant	OTHER	FALSE	FALSE	5	7	12	5,7	1	SNP	0.583333
N2	2	III	1619747	C	G	hsp-60	LOW	5_prime_UTR_premature_start_codon_gain_variant	OTHER	FALSE	FALSE	28	10	38	28,10	1	SNP	0.263158
[truncated: 2,481 more rows]

## Sheet: PRDE1
ANN	Sample	Replicate	CHROM	POS	REF	ALT	GENE	IMPACT	Effect_Type	Functional_Class	LoF	NMD	AD_Ref	AD_Alt	Read_Depth	gt_AD	AC	Variant_Type	Variant_ratio
CT|frameshift_variant|HIGH|rcor-1|WBGene00022278|transcript|Y74C9A.4b.1|protein_coding|6/12|c.717dupA|p.Val240fs|720/2122|717/1695|239/564||,CT|frameshift_variant|HIGH|rcor-1|WBGene00022278|transcript|Y74C9A.4c.1|protein_coding|5/11|c.624dupA|p.Val209fs|624/2016|624/1602|208/533||,CT|frameshift_variant|HIGH|rcor-1|WBGene00022278|transcript|Y74C9A.4a.1|protein_coding|6/12|c.708dupA|p.Val237fs|711/…	PRDE1	1	I	24791	C	CT	rcor-1	HIGH	frameshift_variant	OTHER	TRUE	FALSE	8	2	10	8,2	1	Insertion	0.2
GAA|frameshift_variant|HIGH|csk-1|WBGene00000812|transcript|Y48G1C.2b.1|protein_coding|10/13|c.1535_1536dupAA|p.Ala513fs|1537/2602|1537/1875|513/624||INFO_REALIGN_3_PRIME,GAA|frameshift_variant|HIGH|csk-1|WBGene00000812|transcript|Y48G1C.2b.2|protein_coding|10/14|c.1535_1536dupAA|p.Ala513fs|1537/2342|1537/1875|513/624||INFO_REALIGN_3_PRIME,GAA|frameshift_variant|HIGH|csk-1|WBGene00000812|transcri…	PRDE1	1	I	77069	G	GAA	csk-1	HIGH	frameshift_variant	OTHER	TRUE	FALSE	18	3	21	18,3	1	Insertion	0.142857
CT|frameshift_variant|HIGH|Y48G1C.8|WBGene00021681|transcript|Y48G1C.8b.1|protein_coding|13/14|c.4156dupA|p.Ser1386fs|4218/4895|4156/4551|1386/1516||,CT|frameshift_variant|HIGH|Y48G1C.8|WBGene00021681|transcript|Y48G1C.8a.1|protein_coding|13/14|c.4141dupA|p.Ser1381fs|4203/4880|4141/4536|1381/1511||,CT|upstream_gene_variant|MODIFIER|Y48G1C.13|WBGene00189949|transcript|Y48G1C.13.1|protein_coding||c…	PRDE1	1	I	97827	C	CT	Y48G1C.8	HIGH	frameshift_variant	OTHER	TRUE	FALSE	44	13	57	44,13	1	Insertion	0.22807
GT|frameshift_variant|HIGH|F56C11.3|WBGene00018955|transcript|F56C11.3.1|protein_coding|4/4|c.406dupA|p.Thr136fs|407/547|406/486|136/161||,GT|upstream_gene_variant|MODIFIER|F56C11.7|WBGene00201018|transcript|F56C11.7|lincRNA||n.-3928dupA|||||3928|,GT|upstream_gene_variant|MODIFIER|atm-1|WBGene00000227|transcript|Y48G1BL.2a.1|protein_coding||c.-1158_-1157insT|||||1145|,GT|upstream_gene_variant|MOD…	PRDE1	1	I	182218	G	GT	F56C11.3	HIGH	frameshift_variant	OTHER	TRUE	FALSE	19	8	27	19,8	1	Insertion	0.296296
GA|frameshift_variant|HIGH|vps-20|WBGene00022027|transcript|Y65B4A.3.1|protein_coding|1/5|c.24dupA|p.Glu9fs|157/804|25/627|9/208||INFO_REALIGN_3_PRIME,GA|upstream_gene_variant|MODIFIER|Y65B4A.6|WBGene00022029|transcript|Y65B4A.6a.1|protein_coding||c.-620dupT|||||604|,GA|upstream_gene_variant|MODIFIER|Y65B4A.6|WBGene00022029|transcript|Y65B4A.6b.1|protein_coding||c.-2416dupT|||||2416|,GA|upstream_…	PRDE1	1	I	636953	G	GA	vps-20	HIGH	frameshift_variant	OTHER	FALSE	FALSE	80	11	91	80,11	1	Insertion	0.120879
CA|frameshift_variant|HIGH|pif-1|WBGene00004028|transcript|Y18H1A.6a.1|protein_coding|10/13|c.1234dupA|p.Thr412fs|1384/2324|1235/2034|412/677||INFO_REALIGN_3_PRIME,CA|frameshift_variant|HIGH|pif-1|WBGene00004028|transcript|Y18H1A.6c.1|protein_coding|8/11|c.916dupA|p.Thr306fs|917/1737|917/1716|306/571||INFO_REALIGN_3_PRIME,CA|frameshift_variant|HIGH|pif-1|WBGene00004028|transcript|Y18H1A.6b.1|prot…	PRDE1	1	I	725310	C	CA	pif-1	HIGH	frameshift_variant	OTHER	TRUE	FALSE	8	2	10	8,2	1	Insertion	0.2
C|frameshift_variant|HIGH|mig-1|WBGene00003238|transcript|Y34D9B.1b.1|protein_coding|3/9|c.323delA|p.Lys108fs|377/1746|323/1590|108/529||,C|frameshift_variant|HIGH|mig-1|WBGene00003238|transcript|Y34D9B.1a.1|protein_coding|3/9|c.323delA|p.Lys108fs|408/1765|323/1578|108/525||	PRDE1	1	I	952836	CT	C	mig-1	HIGH	frameshift_variant	OTHER	TRUE	FALSE	9	2	11	9,2	1	Deletion	0.181818
T|missense_variant|MODERATE|mrpl-38|WBGene00021327|transcript|Y34D9A.1.1|protein_coding|3/5|c.386T>A|p.Val129Glu|388/1332|386/1242|129/413||,T|downstream_gene_variant|MODIFIER|spd-1|WBGene00004952|transcript|Y34D9A.4.1|protein_coding||c.*4239T>A|||||4039|	PRDE1	1	I	1026590	A	T	mrpl-38	MODERATE	missense_variant	MISSENSE	FALSE	FALSE	16	2	18	16,2	1	SNP	0.111111
T|missense_variant|MODERATE|mrpl-38|WBGene00021327|transcript|Y34D9A.1.1|protein_coding|3/5|c.385G>A|p.Val129Met|387/1332|385/1242|129/413||,T|downstream_gene_variant|MODIFIER|spd-1|WBGene00004952|transcript|Y34D9A.4.1|protein_coding||c.*4238G>A|||||4038|	PRDE1	1	I	1026591	C	T	mrpl-38	MODERATE	missense_variant	MISSENSE	FALSE	FALSE	16	2	18	16,2	1	SNP	0.111111
GA|frameshift_variant|HIGH|Y48G8AL.5|WBGene00021686|transcript|Y48G8AL.5a.1|protein_coding|3/7|c.1128dupA|p.Val377fs|1169/2524|1129/2055|377/684||INFO_REALIGN_3_PRIME,GA|frameshift_variant|HIGH|Y48G8AL.5|WBGene00021686|transcript|Y48G8AL.5b.1|protein_coding|1/5|c.528dupA|p.Val177fs|529/1455|529/1455|177/484||INFO_REALIGN_3_PRIME,GA|upstream_gene_variant|MODIFIER|Y48G8AL.5|WBGene00021686|transcrip…	PRDE1	1	I	1199070	G	GA	Y48G8AL.5	HIGH	frameshift_variant	OTHER	TRUE	FALSE	53	9	62	53,9	1	Insertion	0.145161
T|frameshift_variant|HIGH|herc-1|WBGene00021685|transcript|Y48G8AL.1a.1|protein_coding|5/18|c.700delC|p.Gln234fs|710/3240|700/3060|234/1019||INFO_REALIGN_3_PRIME,T|frameshift_variant|HIGH|herc-1|WBGene00021685|transcript|Y48G8AL.1a.2|protein_coding|5/18|c.700delC|p.Gln234fs|703/3233|700/3060|234/1019||INFO_REALIGN_3_PRIME,T|upstream_gene_variant|MODIFIER|Y48G8AL.12|WBGene00021690|transcript|Y48G8…	PRDE1	1	I	1222689	TC	T	herc-1	HIGH	frameshift_variant	OTHER	TRUE	FALSE	9	2	11	9,2	1	Deletion	0.181818
A|missense_variant|MODERATE|dapk-1|WBGene00003400|transcript|K12C11.4a.1|protein_coding|4/13|c.947G>A|p.Arg316Gln|960/4488|947/4278|316/1425||,A|missense_variant|MODERATE|dapk-1|WBGene00003400|transcript|K12C11.4b.1|protein_coding|3/12|c.464G>A|p.Arg155Gln|842/4250|464/3795|155/1264||,A|upstream_gene_variant|MODIFIER|K12C11.8|WBGene00197361|transcript|K12C11.8|lincRNA||n.-1757C>T|||||1757|,A|upst…	PRDE1	1	I	1309381	G	A	dapk-1	MODERATE	missense_variant	MISSENSE	FALSE	FALSE	22	4	26	22,4	1	SNP	0.153846
GA|frameshift_variant|HIGH|dapk-1|WBGene00003400|transcript|K12C11.4a.1|protein_coding|5/13|c.1348dupA|p.Ile450fs|1362/4488|1349/4278|450/1425||INFO_REALIGN_3_PRIME,GA|frameshift_variant|HIGH|dapk-1|WBGene00003400|transcript|K12C11.4b.1|protein_coding|4/12|c.865dupA|p.Ile289fs|1244/4250|866/3795|289/1264||INFO_REALIGN_3_PRIME,GA|frameshift_variant|HIGH|dapk-1|WBGene00003400|transcript|K12C11.4c.1…	PRDE1	1	I	1311162	G	GA	dapk-1	HIGH	frameshift_variant	OTHER	TRUE	FALSE	19	5	24	19,5	1	Insertion	0.208333
CA|frameshift_variant|HIGH|Y92H12BR.3|WBGene00022369|transcript|Y92H12BR.3a.1|protein_coding|3/5|c.873dupA|p.Val292fs|879/2512|874/1914|292/637||INFO_REALIGN_3_PRIME,CA|upstream_gene_variant|MODIFIER|Y92H12BR.2|WBGene00022368|transcript|Y92H12BR.2.1|protein_coding||c.-4972dupT|||||4958|,CA|intron_variant|MODIFIER|Y92H12BR.3|WBGene00022369|transcript|Y92H12BR.3b.1|protein_coding|2/3|c.314-1918dupA…	PRDE1	1	I	1420764	C	CA	Y92H12BR.3	HIGH	frameshift_variant	OTHER	TRUE	FALSE	22	7	29	22,7	1	Insertion	0.241379
CA|frameshift_variant|HIGH|mrpl-15|WBGene00022373|transcript|Y92H12BR.8.1|protein_coding|3/3|c.656dupA|p.Asn219fs|670/1027|657/897|219/298||INFO_REALIGN_3_PRIME,CA|upstream_gene_variant|MODIFIER|F37F2.4|WBGene00219937|transcript|F37F2.4|snoRNA||n.-3540_-3539insA|||||3539|,CA|downstream_gene_variant|MODIFIER|F37F2.2|WBGene00018159|transcript|F37F2.2.1|protein_coding||c.*1557dupT|||||1482|,CA|downs…	PRDE1	1	I	1440967	C	CA	mrpl-15	HIGH	frameshift_variant	OTHER	TRUE	FALSE	68	9	77	68,9	1	Insertion	0.116883
T|frameshift_variant|HIGH|Y92H12A.5|WBGene00022361|transcript|Y92H12A.5b.1|protein_coding|1/13|c.195delT|p.Ile66fs|197/4592|195/4137|65/1378||,T|frameshift_variant|HIGH|Y92H12A.5|WBGene00022361|transcript|Y92H12A.5a.1|protein_coding|1/13|c.195delT|p.Ile66fs|197/4130|195/4128|65/1375||,T|upstream_gene_variant|MODIFIER|Y92H12A.4|WBGene00022360|transcript|Y92H12A.4a.1|protein_coding||c.-547delA|||||…	PRDE1	1	I	1514214	TA	T	Y92H12A.5	HIGH	frameshift_variant	OTHER	FALSE	FALSE	13	2	15	13,2	1	Deletion	0.133333
CA|frameshift_variant|HIGH|Y73E7A.2|WBGene00022269|transcript|Y73E7A.2.1|protein_coding|4/4|c.1029dupA|p.Val344fs|1032/1548|1030/1392|344/463||INFO_REALIGN_3_PRIME,CA|upstream_gene_variant|MODIFIER|Y73E7A.5|WBGene00022272|transcript|Y73E7A.5|pseudogene||n.-4947dupT|||||4947|,CA|upstream_gene_variant|MODIFIER|adpr-1|WBGene00044440|transcript|Y73E7A.9a.1|protein_coding||c.-3987_-3986insA|||||3986|,…	PRDE1	1	I	1606403	C	CA	Y73E7A.2	HIGH	frameshift_variant	OTHER	TRUE	FALSE	11	4	15	11,4	1	Insertion	0.266667
CT|frameshift_variant|HIGH|adpr-1|WBGene00044440|transcript|Y73E7A.9a.1|protein_coding|8/8|c.1553dupT|p.Leu518fs|1554/1814|1554/1677|518/558||INFO_REALIGN_3_PRIME,CT|frameshift_variant|HIGH|adpr-1|WBGene00044440|transcript|Y73E7A.9b.1|protein_coding|5/5|c.929dupT|p.Leu310fs|930/1053|930/1053|310/350||INFO_REALIGN_3_PRIME,CT|frameshift_variant|HIGH|adpr-1|WBGene00044440|transcript|Y73E7A.9c.1|prot…	PRDE1	1	I	1619813	C	CT	adpr-1	HIGH	frameshift_variant	OTHER	TRUE	FALSE	17	3	20	17,3	1	Insertion	0.15
CA|frameshift_variant|HIGH|tln-1|WBGene00006771|transcript|Y71G12B.11a.1|protein_coding|5/10|c.1935dupA|p.Leu646fs|1941/8065|1936/7662|646/2553||INFO_REALIGN_3_PRIME,CA|frameshift_variant|HIGH|tln-1|WBGene00006771|transcript|Y71G12B.11b.1|protein_coding|5/7|c.1935dupA|p.Leu646fs|1941/3151|1936/2991|646/996||INFO_REALIGN_3_PRIME,CA|frameshift_variant|HIGH|tln-1|WBGene00006771|transcript|Y71G12B.11…	PRDE1	1	I	1728596	C	CA	tln-1	HIGH	frameshift_variant	OTHER	TRUE	FALSE	21	5	26	21,5	1	Insertion	0.192308
TA|frameshift_variant|HIGH|ddx-27|WBGene00022148|transcript|Y71G12B.8.1|protein_coding|4/6|c.1212dupA|p.Asp405fs|1268/2427|1213/2220|405/739||INFO_REALIGN_3_PRIME,TA|upstream_gene_variant|MODIFIER|Y71G12B.26|WBGene00022161|transcript|Y71G12B.26a.1|protein_coding||c.-2648dupT|||||2615|	PRDE1	1	I	1785208	T	TA	ddx-27	HIGH	frameshift_variant	OTHER	TRUE	FALSE	15	5	20	15,5	1	Insertion	0.25
CA|frameshift_variant|HIGH|ddx-27|WBGene00022148|transcript|Y71G12B.8.1|protein_coding|4/6|c.1323dupA|p.Ala442fs|1379/2427|1324/2220|442/739||INFO_REALIGN_3_PRIME,CA|upstream_gene_variant|MODIFIER|Y71G12B.26|WBGene00022161|transcript|Y71G12B.26a.1|protein_coding||c.-2759dupT|||||2726|	PRDE1	1	I	1785319	C	CA	ddx-27	HIGH	frameshift_variant	OTHER	TRUE	FALSE	22	8	30	22,8	1	Insertion	0.266667
CA|frameshift_variant|HIGH|tub-2|WBGene00022139|transcript|Y71G12A.3a.1|protein_coding|1/6|c.1053dupA|p.Val352fs|1198/2921|1054/2610|352/869||INFO_REALIGN_3_PRIME,CA|upstream_gene_variant|MODIFIER|scm-1|WBGene00004743|transcript|M01D7.2a.1|protein_coding||c.-2944dupT|||||2917|,CA|upstream_gene_variant|MODIFIER|tub-2|WBGene00022139|transcript|Y71G12A.3b.1|protein_coding||c.-4442_-4441insA|||||4441…	PRDE1	1	I	1875222	C	CA	tub-2	HIGH	frameshift_variant	OTHER	TRUE	FALSE	9	2	11	9,2	1	Insertion	0.181818
A|missense_variant|MODERATE|trpp-10|WBGene00022138|transcript|Y71G12A.2b.1|protein_coding|4/14|c.403G>A|p.Ala135Thr|477/3549|403/3339|135/1112||,A|missense_variant|MODERATE|trpp-10|WBGene00022138|transcript|Y71G12A.2a.1|protein_coding|4/12|c.403G>A|p.Ala135Thr|477/2735|403/2661|135/886||,A|upstream_gene_variant|MODIFIER|Y71G12A.4|WBGene00022140|transcript|Y71G12A.4.1|protein_coding||c.-1648C>T|||…	PRDE1	1	I	1896526	G	A	trpp-10	MODERATE	missense_variant	MISSENSE	FALSE	FALSE	14	4	18	14,4	1	SNP	0.222222
TA|frameshift_variant|HIGH|hex-4|WBGene00021766|transcript|Y51F10.5.1|protein_coding|2/5|c.422dupA|p.Ser142fs|496/1777|423/1476|141/491||INFO_REALIGN_3_PRIME,TA|downstream_gene_variant|MODIFIER|trpp-10|WBGene00022138|transcript|Y71G12A.2b.1|protein_coding||c.*3279_*3280insA|||||3144|,TA|downstream_gene_variant|MODIFIER|trpp-10|WBGene00022138|transcript|Y71G12A.2c.1|protein_coding||c.*3279_*3280in…	PRDE1	1	I	1926231	T	TA	hex-4	HIGH	frameshift_variant	OTHER	TRUE	FALSE	37	7	44	37,7	1	Insertion	0.159091
GT|frameshift_variant|HIGH|spe-48|WBGene00021771|transcript|Y51F10.10a.1|protein_coding|5/7|c.652dupA|p.Thr218fs|726/1267|652/1014|218/337||,GT|frameshift_variant|HIGH|spe-48|WBGene00021771|transcript|Y51F10.10b.1|protein_coding|5/7|c.577dupA|p.Thr193fs|651/1192|577/939|193/312||,GT|frameshift_variant|HIGH|spe-48|WBGene00021771|transcript|Y51F10.10c.1|protein_coding|4/6|c.532dupA|p.Thr178fs|553/1…	PRDE1	1	I	1953470	G	GT	spe-48	HIGH	frameshift_variant	OTHER	TRUE	FALSE	24	4	28	24,4	1	Insertion	0.142857
CA|frameshift_variant|HIGH|Y51F10.11|WBGene00044438|transcript|Y51F10.11.1|protein_coding|3/6|c.171dupA|p.Ala58fs|172/1126|172/831|58/276||INFO_REALIGN_3_PRIME,CA|upstream_gene_variant|MODIFIER|spe-48|WBGene00021771|transcript|Y51F10.10a.1|protein_coding||c.-1826dupT|||||1752|,CA|upstream_gene_variant|MODIFIER|spe-48|WBGene00021771|transcript|Y51F10.10b.1|protein_coding||c.-1826dupT|||||1752|,CA|…	PRDE1	1	I	1960278	C	CA	Y51F10.11	HIGH	frameshift_variant	OTHER	TRUE	FALSE	13	5	18	13,5	1	Insertion	0.277778
C|5_prime_UTR_premature_start_codon_gain_variant|LOW|rla-1|WBGene00004409|transcript|Y37E3.7.3|protein_coding|1/2|c.-65C>G||||||,C|5_prime_UTR_variant|MODIFIER|rla-1|WBGene00004409|transcript|Y37E3.7.3|protein_coding|1/2|c.-65C>G|||||65|,C|upstream_gene_variant|MODIFIER|Y37E3.26|WBGene00195672|transcript|Y37E3.26|lincRNA||n.-627C>G|||||627|,C|upstream_gene_variant|MODIFIER|rla-1|WBGene00004409|tr…	PRDE1	1	I	2069578	G	C	rla-1	LOW	5_prime_UTR_premature_start_codon_gain_variant	OTHER	FALSE	FALSE	11	2	13	11,2	1	SNP	0.153846
GA|frameshift_variant|HIGH|npp-13|WBGene00003799|transcript|Y37E3.15a.1|protein_coding|4/11|c.563dupA|p.Ser189fs|565/2539|564/2364|188/787||INFO_REALIGN_3_PRIME,GA|frameshift_variant|HIGH|npp-13|WBGene00003799|transcript|Y37E3.15c.1|protein_coding|2/9|c.167dupA|p.Ser57fs|168/2126|168/1968|56/655||INFO_REALIGN_3_PRIME,GA|non_coding_transcript_exon_variant|MODIFIER|npp-13|WBGene00003799|transcript|…	PRDE1	1	I	2100724	G	GA	npp-13	HIGH	frameshift_variant	OTHER	TRUE	FALSE	19	5	24	19,5	1	Insertion	0.208333
GA|frameshift_variant|HIGH|afd-1|WBGene00021009|transcript|W03F11.6c.1|protein_coding|2/20|c.375dupA|p.Asp126fs|405/5308|376/4983|126/1660||INFO_REALIGN_3_PRIME,GA|frameshift_variant|HIGH|afd-1|WBGene00021009|transcript|W03F11.6a.1|protein_coding|2/20|c.375dupA|p.Asp126fs|405/5302|376/4977|126/1658||INFO_REALIGN_3_PRIME,GA|frameshift_variant|HIGH|afd-1|WBGene00021009|transcript|W03F11.6d.1|protei…	PRDE1	1	I	2163257	G	GA	afd-1	HIGH	frameshift_variant	OTHER	TRUE	FALSE	37	7	44	37,7	1	Insertion	0.159091
C|5_prime_UTR_premature_start_codon_gain_variant|LOW|did-2|WBGene00017735|transcript|F23C8.6.1|protein_coding|1/3|c.-39C>G||||||,C|5_prime_UTR_variant|MODIFIER|did-2|WBGene00017735|transcript|F23C8.6.1|protein_coding|1/3|c.-39C>G|||||39|,C|upstream_gene_variant|MODIFIER|F23C8.5|WBGene00017734|transcript|F23C8.5a.1|protein_coding||c.-1390C>G|||||1383|,C|upstream_gene_variant|MODIFIER|F23C8.5|WBGen…	PRDE1	1	I	2421736	G	C	did-2	LOW	5_prime_UTR_premature_start_codon_gain_variant	OTHER	FALSE	FALSE	12	3	15	12,3	1	SNP	0.2
GT|frameshift_variant|HIGH|tipn-1|WBGene00017738|transcript|F23C8.9.1|protein_coding|6/6|c.562dupA|p.Thr188fs|604/884|562/702|188/233||,GT|upstream_gene_variant|MODIFIER|F23C8.8|WBGene00017737|transcript|F23C8.8.1|protein_coding||c.-269dupA|||||249|,GT|upstream_gene_variant|MODIFIER|ubxn-1|WBGene00017733|transcript|F23C8.4.1|protein_coding||c.-1162_-1161insT|||||1154|,GT|upstream_gene_variant|MOD…	PRDE1	1	I	2432849	G	GT	tipn-1	HIGH	frameshift_variant	OTHER	TRUE	FALSE	67	10	77	67,10	1	Insertion	0.12987
CA|frameshift_variant|HIGH|Y23H5B.6|WBGene00021277|transcript|Y23H5B.6a.1|protein_coding|4/5|c.1582dupA|p.Ser528fs|1591/2317|1583/2199|528/732||INFO_REALIGN_3_PRIME,CA|frameshift_variant|HIGH|Y23H5B.6|WBGene00021277|transcript|Y23H5B.6b.1|protein_coding|1/2|c.337dupA|p.Ser113fs|382/1108|338/954|113/317||INFO_REALIGN_3_PRIME,CA|frameshift_variant|HIGH|Y23H5B.6|WBGene00021277|transcript|Y23H5B.6c.1…	PRDE1	1	I	2495322	C	CA	Y23H5B.6	HIGH	frameshift_variant	OTHER	TRUE	FALSE	126	16	142	126,16	1	Insertion	0.112676
CA|frameshift_variant|HIGH|Y23H5B.6|WBGene00021277|transcript|Y23H5B.6a.1|protein_coding|5/5|c.1782dupA|p.Ala595fs|1791/2317|1783/2199|595/732||INFO_REALIGN_3_PRIME,CA|frameshift_variant|HIGH|Y23H5B.6|WBGene00021277|transcript|Y23H5B.6b.1|protein_coding|2/2|c.537dupA|p.Ala180fs|582/1108|538/954|180/317||INFO_REALIGN_3_PRIME,CA|frameshift_variant|HIGH|Y23H5B.6|WBGene00021277|transcript|Y23H5B.6c.1…	PRDE1	1	I	2496838	C	CA	Y23H5B.6	HIGH	frameshift_variant	OTHER	TRUE	FALSE	78	11	89	78,11	1	Insertion	0.123596
C|frameshift_variant|HIGH|sop-3|WBGene00004946|transcript|Y71F9B.10c.1|protein_coding|11/14|c.2752_2753delAA|p.Lys918fs|2768/4621|2752/4446|918/1481||,C|frameshift_variant|HIGH|sop-3|WBGene00004946|transcript|Y71F9B.10d.1|protein_coding|6/9|c.1786_1787delAA|p.Lys596fs|1961/3814|1786/3480|596/1159||,C|frameshift_variant|HIGH|sop-3|WBGene00004946|transcript|Y71F9B.10a.1|protein_coding|11/14|c.2734_…	PRDE1	1	I	2765385	CTT	C	sop-3	HIGH	frameshift_variant	OTHER	TRUE	FALSE	13	2	15	13,2	1	Deletion	0.133333
C|5_prime_UTR_premature_start_codon_gain_variant|LOW|rpl-1|WBGene00004412|transcript|Y71F9AL.13a.2|protein_coding|1/3|c.-9C>G||||||,C|5_prime_UTR_variant|MODIFIER|rpl-1|WBGene00004412|transcript|Y71F9AL.13a.2|protein_coding|1/3|c.-9C>G|||||9|,C|upstream_gene_variant|MODIFIER|Y71F9AL.12|WBGene00022117|transcript|Y71F9AL.12.1|protein_coding||c.-1022C>G|||||1022|,C|upstream_gene_variant|MODIFIER|rpl…	PRDE1	1	I	2876311	G	C	rpl-1	LOW	5_prime_UTR_premature_start_codon_gain_variant	OTHER	FALSE	FALSE	6	71	77	6,71	2	SNP	0.922078
C|missense_variant|MODERATE|Y71F9AL.1|WBGene00022107|transcript|Y71F9AL.1.1|protein_coding|2/7|c.155T>C|p.Leu52Pro|188/1458|155/1299|52/432||,C|upstream_gene_variant|MODIFIER|parp-1|WBGene00004049|transcript|Y71F9AL.18a.1|protein_coding||c.-760A>G|||||741|,C|upstream_gene_variant|MODIFIER|trap-1|WBGene00022122|transcript|Y71F9AM.6.1|protein_coding||c.-2943T>C|||||2941|,C|upstream_gene_variant|MOD…	PRDE1	1	I	2925454	T	C	Y71F9AL.1	MODERATE	missense_variant	MISSENSE	FALSE	FALSE	15	5	20	15,5	1	SNP	0.25
GA|frameshift_variant|HIGH|supr-1|WBGene00022124|transcript|Y71F9AR.3.1|protein_coding|5/14|c.557dupT|p.Ala187fs|558/2325|557/2241|186/746||,GA|upstream_gene_variant|MODIFIER|dnj-28|WBGene00001046|transcript|Y54E10BL.4.1|protein_coding||c.-2212_-2211insA|||||2102|	PRDE1	1	I	2994298	G	GA	supr-1	HIGH	frameshift_variant	OTHER	TRUE	FALSE	8	3	11	8,3	1	Insertion	0.272727
GA|frameshift_variant|HIGH|Y54E10BR.3|WBGene00021842|transcript|Y54E10BR.3.1|protein_coding|4/5|c.678dupA|p.Val227fs|692/1161|679/915|227/304||INFO_REALIGN_3_PRIME,GA|downstream_gene_variant|MODIFIER|sec-11|WBGene00021844|transcript|Y54E10BR.5.1|protein_coding||c.*1901dupT|||||1732|,GA|downstream_gene_variant|MODIFIER|rpb-7|WBGene00021845|transcript|Y54E10BR.6.1|protein_coding||c.*4763dupT|||||46…	PRDE1	1	I	3026574	G	GA	Y54E10BR.3	HIGH	frameshift_variant	OTHER	TRUE	FALSE	24	6	30	24,6	1	Insertion	0.2
CA|frameshift_variant|HIGH|Y54E10A.6|WBGene00021828|transcript|Y54E10A.6.1|protein_coding|3/5|c.742dupA|p.Ile248fs|747/2020|743/1524|248/507||INFO_REALIGN_3_PRIME,CA|upstream_gene_variant|MODIFIER|vbh-1|WBGene00006888|transcript|Y54E10A.9c.1|protein_coding||c.-2930dupT|||||2930|,CA|upstream_gene_variant|MODIFIER|dnc-6|WBGene00021827|transcript|Y54E10A.5.1|protein_coding||c.-3148_-3147insA|||||312…	PRDE1	1	I	3165064	C	CA	Y54E10A.6	HIGH	frameshift_variant	OTHER	TRUE	FALSE	11	4	15	11,4	1	Insertion	0.266667
AT|frameshift_variant|HIGH|Y54E10A.10|WBGene00021830|transcript|Y54E10A.10.1|protein_coding|1/4|c.19dupA|p.Ile7fs|28/994|19/894|7/297||,AT|frameshift_variant|HIGH|Y54E10A.10|WBGene00021830|transcript|Y54E10A.10.2|protein_coding|1/4|c.19dupA|p.Ile7fs|28/1019|19/894|7/297||,AT|downstream_gene_variant|MODIFIER|Y54E10A.11|WBGene00021831|transcript|Y54E10A.11.1|protein_coding||c.*220dupA|||||127|,AT|d…	PRDE1	1	I	3176291	A	AT	Y54E10A.10	HIGH	frameshift_variant	OTHER	FALSE	FALSE	9	2	11	9,2	1	Insertion	0.181818
A|missense_variant|MODERATE|cdap-2|WBGene00021549|transcript|Y44E3A.4.1|protein_coding|3/9|c.278C>T|p.Ala93Val|340/2031|278/1656|93/551||	PRDE1	1	I	3328880	G	A	cdap-2	MODERATE	missense_variant	MISSENSE	FALSE	FALSE	11	2	13	11,2	1	SNP	0.153846
GA|frameshift_variant|HIGH|W05F2.6|WBGene00021038|transcript|W05F2.6a.1|protein_coding|2/8|c.360dupA|p.Leu121fs|436/1503|361/1368|121/455||INFO_REALIGN_3_PRIME,GA|upstream_gene_variant|MODIFIER|enu-3.4|WBGene00021034|transcript|W05F2.2.1|protein_coding||c.-3439dupT|||||3439|,GA|upstream_gene_variant|MODIFIER|W05F2.3|WBGene00021035|transcript|W05F2.3.1|protein_coding||c.-746dupT|||||746|,GA|upstre…	PRDE1	1	I	3369295	G	GA	W05F2.6	HIGH	frameshift_variant	OTHER	TRUE	FALSE	20	5	25	20,5	1	Insertion	0.2
GA|frameshift_variant|HIGH|msh-6|WBGene00003422|transcript|Y47G6A.11.1|protein_coding|3/8|c.477dupA|p.Val160fs|479/3667|478/3561|160/1186||INFO_REALIGN_3_PRIME,GA|downstream_gene_variant|MODIFIER|tag-63|WBGene00006440|transcript|Y47G6A.28.1|protein_coding||c.*3103_*3104insA|||||2912|	PRDE1	1	I	3452086	G	GA	msh-6	HIGH	frameshift_variant	OTHER	TRUE	FALSE	56	7	63	56,7	1	Insertion	0.111111
GA|frameshift_variant|HIGH|Y47G6A.9|WBGene00021638|transcript|Y47G6A.9.1|protein_coding|3/4|c.465dupA|p.Leu156fs|466/783|466/693|156/230||INFO_REALIGN_3_PRIME,GA|upstream_gene_variant|MODIFIER|Y47G6A.15|WBGene00021641|transcript|Y47G6A.15.1|protein_coding||c.-4335dupT|||||4315|,GA|upstream_gene_variant|MODIFIER|crn-1|WBGene00000794|transcript|Y47G6A.8.1|protein_coding||c.-1405_-1404insA|||||1361|…	PRDE1	1	I	3480625	G	GA	Y47G6A.9	HIGH	frameshift_variant	OTHER	TRUE	FALSE	76	13	89	76,13	1	Insertion	0.146067
AT|frameshift_variant|HIGH|lpd-3|WBGene00003060|transcript|Y47G6A.23d.1|protein_coding|20/31|c.6318dupA|p.Ser2107fs|6370/12352|6318/12069|2106/4022||,AT|frameshift_variant|HIGH|lpd-3|WBGene00003060|transcript|Y47G6A.23a.1|protein_coding|20/31|c.6306dupA|p.Ser2103fs|6306/12260|6306/12057|2102/4018||,AT|frameshift_variant|HIGH|lpd-3|WBGene00003060|transcript|Y47G6A.23b.1|protein_coding|20/31|c.6312…	PRDE1	1	I	3580387	A	AT	lpd-3	HIGH	frameshift_variant	OTHER	TRUE	FALSE	30	7	37	30,7	1	Insertion	0.189189
CT|frameshift_variant|HIGH|lpd-3|WBGene00003060|transcript|Y47G6A.23d.1|protein_coding|13/31|c.2720dupA|p.Thr908fs|2772/12352|2720/12069|907/4022||,CT|frameshift_variant|HIGH|lpd-3|WBGene00003060|transcript|Y47G6A.23a.1|protein_coding|13/31|c.2714dupA|p.Thr906fs|2714/12260|2714/12057|905/4018||,CT|frameshift_variant|HIGH|lpd-3|WBGene00003060|transcript|Y47G6A.23b.1|protein_coding|13/31|c.2720dupA…	PRDE1	1	I	3589548	C	CT	lpd-3	HIGH	frameshift_variant	OTHER	TRUE	FALSE	32	5	37	32,5	1	Insertion	0.135135
CT|frameshift_variant|HIGH|Y47G6A.25|WBGene00021649|transcript|Y47G6A.25.1|protein_coding|6/6|c.1180dupA|p.Arg394fs|1246/1444|1180/1323|394/440||,CT|upstream_gene_variant|MODIFIER|mis-12|WBGene00021648|transcript|Y47G6A.24a.1|protein_coding||c.-915dupA|||||906|,CT|upstream_gene_variant|MODIFIER|Y47G6A.39|WBGene00271653|transcript|Y47G6A.39|lincRNA||n.-514_-513insT|||||513|,CT|upstream_gene_varian…	PRDE1	1	I	3606608	C	CT	Y47G6A.25	HIGH	frameshift_variant	OTHER	TRUE	FALSE	12	6	18	12,6	1	Insertion	0.333333
CT|frameshift_variant|HIGH|inx-21|WBGene00002143|transcript|Y47G6A.1.1|protein_coding|2/9|c.382dupT|p.Trp128fs|383/1656|383/1446|128/481||INFO_REALIGN_3_PRIME,CT|frameshift_variant|HIGH|inx-21|WBGene00002143|transcript|Y47G6A.1.2|protein_coding|2/9|c.382dupT|p.Trp128fs|416/1689|383/1446|128/481||INFO_REALIGN_3_PRIME,CT|upstream_gene_variant|MODIFIER|Y47G6A.25|WBGene00021649|transcript|Y47G6A.25.1…	PRDE1	1	I	3612367	C	CT	inx-21	HIGH	frameshift_variant	OTHER	TRUE	FALSE	6	5	11	6,5	1	Insertion	0.454545
C|5_prime_UTR_premature_start_codon_gain_variant|LOW|rab-8|WBGene00004272|transcript|D1037.4.2|protein_coding|1/4|c.-30C>G||||||,C|5_prime_UTR_variant|MODIFIER|rab-8|WBGene00004272|transcript|D1037.4.2|protein_coding|1/4|c.-30C>G|||||30|,C|upstream_gene_variant|MODIFIER|ftn-2|WBGene00001501|transcript|D1037.3.1|protein_coding||c.-3190C>G|||||3145|,C|upstream_gene_variant|MODIFIER|rab-8|WBGene0000…	PRDE1	1	I	3684089	G	C	rab-8	LOW	5_prime_UTR_premature_start_codon_gain_variant	OTHER	FALSE	FALSE	11	6	17	11,6	1	SNP	0.352941
GT|frameshift_variant|HIGH|lin-59|WBGene00003040|transcript|T12F5.4.1|protein_coding|7/8|c.3032dupA|p.Asn1011fs|3129/4658|3032/3939|1011/1312||,GT|downstream_gene_variant|MODIFIER|mir-8204|WBGene00255568|transcript|F21A9.4|pseudogene||n.*4821_*4822insT|||||4822|,GT|downstream_gene_variant|MODIFIER|F21A9.1|WBGene00017650|transcript|F21A9.1b.1|protein_coding||c.*1949_*1950insT|||||1929|,GT|downstre…	PRDE1	1	I	3715062	G	GT	lin-59	HIGH	frameshift_variant	OTHER	TRUE	FALSE	22	4	26	22,4	1	Insertion	0.153846
G|missense_variant|MODERATE|inx-12|WBGene00002134|transcript|ZK770.3.1|protein_coding|5/5|c.1039T>C|p.Ser347Pro|1087/1408|1039/1227|347/408||,G|missense_variant|MODERATE|inx-12|WBGene00002134|transcript|ZK770.3.2|protein_coding|5/5|c.1039T>C|p.Ser347Pro|1125/1459|1039/1227|347/408||,G|upstream_gene_variant|MODIFIER|inx-13|WBGene00002135|transcript|Y8G1A.2.1|protein_coding||c.-1886T>C|||||1833|	PRDE1	1	I	3755791	A	G	inx-12	MODERATE	missense_variant	MISSENSE	FALSE	FALSE	7	8	15	7,8	1	SNP	0.533333
GT|frameshift_variant|HIGH|C32E8.9|WBGene00016325|transcript|C32E8.9.1|protein_coding|5/5|c.757dupA|p.Thr253fs|777/899|757/807|253/268||,GT|upstream_gene_variant|MODIFIER|ptr-2|WBGene00004217|transcript|C32E8.8.1|protein_coding||c.-1883dupA|||||1881|,GT|upstream_gene_variant|MODIFIER|C32E8.1|WBGene00016320|transcript|C32E8.1.1|protein_coding||c.-1489_-1488insT|||||1475|,GT|downstream_gene_variant…	PRDE1	1	I	3794677	G	GT	C32E8.9	HIGH	frameshift_variant	OTHER	TRUE	FALSE	8	2	10	8,2	1	Insertion	0.2
CT|frameshift_variant|HIGH|hcp-4|WBGene00001832|transcript|T03F1.9.1|protein_coding|6/8|c.1891dupA|p.Arg631fs|1892/2704|1891/2601|631/866||,CT|frameshift_variant|HIGH|hcp-4|WBGene00001832|transcript|T03F1.9.2|protein_coding|6/8|c.1891dupA|p.Arg631fs|1892/2762|1891/2601|631/866||,CT|upstream_gene_variant|MODIFIER|tfbm-1|WBGene00020189|transcript|T03F1.7.1|protein_coding||c.-4448dupA|||||4448|,CT|u…	PRDE1	1	I	3863739	C	CT	hcp-4	HIGH	frameshift_variant	OTHER	TRUE	FALSE	35	5	40	35,5	1	Insertion	0.125
CT|frameshift_variant|HIGH|hcp-4|WBGene00001832|transcript|T03F1.9.1|protein_coding|5/8|c.1331dupA|p.Ile445fs|1332/2704|1331/2601|444/866||,CT|frameshift_variant|HIGH|hcp-4|WBGene00001832|transcript|T03F1.9.2|protein_coding|5/8|c.1331dupA|p.Ile445fs|1332/2762|1331/2601|444/866||,CT|upstream_gene_variant|MODIFIER|guk-1|WBGene00020190|transcript|T03F1.8a.1|protein_coding||c.-1800dupA|||||1623|,CT|u…	PRDE1	1	I	3864351	C	CT	hcp-4	HIGH	frameshift_variant	OTHER	TRUE	FALSE	47	8	55	47,8	1	Insertion	0.145455
GA|frameshift_variant|HIGH|C50F2.2|WBGene00016836|transcript|C50F2.2.1|protein_coding|1/6|c.192dupA|p.Glu65fs|210/3205|193/3090|65/1029||INFO_REALIGN_3_PRIME,GA|downstream_gene_variant|MODIFIER|syf-1|WBGene00016837|transcript|C50F2.3.1|protein_coding||c.*1334_*1335insA|||||1272|,GA|downstream_gene_variant|MODIFIER|abf-2|WBGene00000013|transcript|C50F2.10.1|protein_coding||c.*3612dupT|||||3529|,GA…	PRDE1	1	I	3882018	G	GA	C50F2.2	HIGH	frameshift_variant	OTHER	TRUE	FALSE	13	4	17	13,4	1	Insertion	0.235294
GA|frameshift_variant|HIGH|C50F2.2|WBGene00016836|transcript|C50F2.2.1|protein_coding|3/6|c.441dupA|p.Ala148fs|459/3205|442/3090|148/1029||INFO_REALIGN_3_PRIME,GA|downstream_gene_variant|MODIFIER|syf-1|WBGene00016837|transcript|C50F2.3.1|protein_coding||c.*1692_*1693insA|||||1630|,GA|downstream_gene_variant|MODIFIER|abf-2|WBGene00000013|transcript|C50F2.10.1|protein_coding||c.*3254dupT|||||3171|,…	PRDE1	1	I	3882376	G	GA	C50F2.2	HIGH	frameshift_variant	OTHER	TRUE	FALSE	48	7	55	48,7	1	Insertion	0.127273
GT|frameshift_variant|HIGH|lrp-2|WBGene00003072|transcript|T21E3.3.1|protein_coding|17/20|c.13899dupA|p.Pro4634fs|13948/14848|13899/14577|4633/4858||,GT|downstream_gene_variant|MODIFIER|egg-4|WBGene00020652|transcript|T21E3.1.1|protein_coding||c.*2191_*2192insT|||||2094|	PRDE1	1	I	3936906	G	GT	lrp-2	HIGH	frameshift_variant	OTHER	FALSE	FALSE	9	3	12	9,3	1	Insertion	0.25
CA|frameshift_variant|HIGH|lrp-2|WBGene00003072|transcript|T21E3.3.1|protein_coding|14/20|c.12322dupT|p.Trp4108fs|12371/14848|12322/14577|4108/4858||,CA|downstream_gene_variant|MODIFIER|egg-4|WBGene00020652|transcript|T21E3.1.1|protein_coding||c.*4343_*4344insA|||||4246|	PRDE1	1	I	3939058	C	CA	lrp-2	HIGH	frameshift_variant	OTHER	TRUE	FALSE	9	3	12	9,3	1	Insertion	0.25
A|frameshift_variant|HIGH|lrp-2|WBGene00003072|transcript|T21E3.3.1|protein_coding|9/20|c.7050_7051delAA|p.Lys2350fs|7100/14848|7050/14577|2350/4858||	PRDE1	1	I	3945383	ATT	A	lrp-2	HIGH	frameshift_variant	OTHER	TRUE	FALSE	17	2	19	17,2	1	Deletion	0.105263
CA|frameshift_variant|HIGH|aars-2|WBGene00000197|transcript|F28H1.3.1|protein_coding|4/6|c.2037dupA|p.Val680fs|2060/3126|2038/2907|680/968||INFO_REALIGN_3_PRIME,CA|frameshift_variant|HIGH|aars-2|WBGene00000197|transcript|F28H1.3.3|protein_coding|4/6|c.2037dupA|p.Val680fs|2072/3138|2038/2907|680/968||INFO_REALIGN_3_PRIME,CA|frameshift_variant|HIGH|aars-2|WBGene00000197|transcript|F28H1.3.2|protein…	PRDE1	1	I	3985385	C	CA	aars-2	HIGH	frameshift_variant	OTHER	TRUE	FALSE	103	25	128	103,25	1	Insertion	0.195312
CA|frameshift_variant|HIGH|unc-89|WBGene00006820|transcript|C09D1.1b.1|protein_coding|20/48|c.4965dupA|p.Glu1656fs|5157/24894|4966/24246|1656/8081||INFO_REALIGN_3_PRIME,CA|frameshift_variant|HIGH|unc-89|WBGene00006820|transcript|C09D1.1a.1|protein_coding|20/34|c.4965dupA|p.Glu1656fs|5157/20769|4966/19899|1656/6632||INFO_REALIGN_3_PRIME,CA|frameshift_variant|HIGH|unc-89|WBGene00006820|transcript|C…	PRDE1	1	I	4056560	C	CA	unc-89	HIGH	frameshift_variant	OTHER	TRUE	FALSE	24	5	29	24,5	1	Insertion	0.172414
CA|frameshift_variant|HIGH|unc-89|WBGene00006820|transcript|C09D1.1b.1|protein_coding|20/48|c.5016dupA|p.Glu1673fs|5208/24894|5017/24246|1673/8081||INFO_REALIGN_3_PRIME,CA|frameshift_variant|HIGH|unc-89|WBGene00006820|transcript|C09D1.1a.1|protein_coding|20/34|c.5016dupA|p.Glu1673fs|5208/20769|5017/19899|1673/6632||INFO_REALIGN_3_PRIME,CA|frameshift_variant|HIGH|unc-89|WBGene00006820|transcript|C…	PRDE1	1	I	4056611	C	CA	unc-89	HIGH	frameshift_variant	OTHER	TRUE	FALSE	19	5	24	19,5	1	Insertion	0.208333
CA|frameshift_variant|HIGH|unc-89|WBGene00006820|transcript|C09D1.1b.1|protein_coding|20/48|c.5274dupA|p.Glu1759fs|5466/24894|5275/24246|1759/8081||INFO_REALIGN_3_PRIME,CA|frameshift_variant|HIGH|unc-89|WBGene00006820|transcript|C09D1.1a.1|protein_coding|20/34|c.5274dupA|p.Glu1759fs|5466/20769|5275/19899|1759/6632||INFO_REALIGN_3_PRIME,CA|frameshift_variant|HIGH|unc-89|WBGene00006820|transcript|C…	PRDE1	1	I	4056869	C	CA	unc-89	HIGH	frameshift_variant	OTHER	TRUE	FALSE	15	7	22	15,7	1	Insertion	0.318182
CA|frameshift_variant|HIGH|unc-89|WBGene00006820|transcript|C09D1.1b.1|protein_coding|20/48|c.5328dupA|p.Glu1777fs|5520/24894|5329/24246|1777/8081||INFO_REALIGN_3_PRIME,CA|frameshift_variant|HIGH|unc-89|WBGene00006820|transcript|C09D1.1a.1|protein_coding|20/34|c.5328dupA|p.Glu1777fs|5520/20769|5329/19899|1777/6632||INFO_REALIGN_3_PRIME,CA|frameshift_variant|HIGH|unc-89|WBGene00006820|transcript|C…	PRDE1	1	I	4056923	C	CA	unc-89	HIGH	frameshift_variant	OTHER	TRUE	FALSE	23	5	28	23,5	1	Insertion	0.178571
GA|frameshift_variant|HIGH|unc-89|WBGene00006820|transcript|C09D1.1b.1|protein_coding|20/48|c.5440dupA|p.Thr1814fs|5632/24894|5441/24246|1814/8081||INFO_REALIGN_3_PRIME,GA|frameshift_variant|HIGH|unc-89|WBGene00006820|transcript|C09D1.1a.1|protein_coding|20/34|c.5440dupA|p.Thr1814fs|5632/20769|5441/19899|1814/6632||INFO_REALIGN_3_PRIME,GA|frameshift_variant|HIGH|unc-89|WBGene00006820|transcript|C…	PRDE1	1	I	4057035	G	GA	unc-89	HIGH	frameshift_variant	OTHER	TRUE	FALSE	24	5	29	24,5	1	Insertion	0.172414
TA|frameshift_variant|HIGH|E01A2.2|WBGene00017085|transcript|E01A2.2a.1|protein_coding|5/7|c.654dupA|p.Asp219fs|656/2315|655/2139|219/712||INFO_REALIGN_3_PRIME,TA|frameshift_variant|HIGH|E01A2.2|WBGene00017085|transcript|E01A2.2b.1|protein_coding|2/4|c.105dupA|p.Asp36fs|263/1924|106/1590|36/529||INFO_REALIGN_3_PRIME,TA|upstream_gene_variant|MODIFIER|let-504|WBGene00002696|transcript|E01A2.4.1|pro…	PRDE1	1	I	4133468	T	TA	E01A2.2	HIGH	frameshift_variant	OTHER	TRUE	FALSE	171	31	202	171,31	1	Insertion	0.153465
GA|frameshift_variant|HIGH|rpn-8|WBGene00004464|transcript|R12E2.3.1|protein_coding|4/7|c.370dupA|p.Ile124fs|375/1234|371/1089|124/362||INFO_REALIGN_3_PRIME,GA|upstream_gene_variant|MODIFIER|egg-5|WBGene00020035|transcript|R12E2.10.1|protein_coding||c.-4257dupT|||||4255|,GA|upstream_gene_variant|MODIFIER|R12E2.18|WBGene00197595|transcript|R12E2.18|lincRNA||n.-3538dupT|||||3538|,GA|upstream_gene_v…	PRDE1	1	I	4175843	G	GA	rpn-8	HIGH	frameshift_variant	OTHER	TRUE	FALSE	50	8	58	50,8	1	Insertion	0.137931
CA|frameshift_variant|HIGH|cas-2|WBGene00015975|transcript|C18E3.6a.1|protein_coding|5/5|c.1180dupA|p.Thr394fs|1181/1480|1181/1374|394/457||INFO_REALIGN_3_PRIME,CA|frameshift_variant|HIGH|cas-2|WBGene00015975|transcript|C18E3.6a.2|protein_coding|5/5|c.1180dupA|p.Thr394fs|1197/1484|1181/1374|394/457||INFO_REALIGN_3_PRIME,CA|frameshift_variant|HIGH|cas-2|WBGene00015975|transcript|C18E3.6b.1|protein…	PRDE1	1	I	4192823	C	CA	cas-2	HIGH	frameshift_variant	OTHER	TRUE	FALSE	18	8	26	18,8	1	Insertion	0.307692
GTT|frameshift_variant|HIGH|C18E3.3|WBGene00015972|transcript|C18E3.3.1|protein_coding|5/10|c.538_539dupTT|p.Leu180fs|542/2886|540/2682|180/893||INFO_REALIGN_3_PRIME,GTT|downstream_gene_variant|MODIFIER|snrp-40.2|WBGene00015974|transcript|C18E3.5.1|protein_coding||c.*1048_*1049insTT|||||917|,GTT|downstream_gene_variant|MODIFIER|C18E3.4|WBGene00015973|transcript|C18E3.4.1|protein_coding||c.*1179_*…	PRDE1	1	I	4204219	G	GTT	C18E3.3	HIGH	frameshift_variant	OTHER	TRUE	FALSE	9	2	11	9,2	1	Insertion	0.181818
AT|frameshift_variant|HIGH|C18E3.9|WBGene00015976|transcript|C18E3.9b.1|protein_coding|3/8|c.256dupA|p.Ile86fs|341/1121|256/909|86/302||,AT|frameshift_variant|HIGH|C18E3.9|WBGene00015976|transcript|C18E3.9a.1|protein_coding|3/8|c.256dupA|p.Ile86fs|357/1127|256/897|86/298||,AT|upstream_gene_variant|MODIFIER|hop-1|WBGene00001985|transcript|C18E3.8.1|protein_coding||c.-4965dupA|||||4964|,AT|upstream…	PRDE1	1	I	4215304	A	AT	C18E3.9	HIGH	frameshift_variant	OTHER	TRUE	FALSE	13	3	16	13,3	1	Insertion	0.1875
GT|frameshift_variant|HIGH|exoc-7|WBGene00016606|transcript|C43E11.8.1|protein_coding|1/7|c.105dupA|p.Leu36fs|107/2012|105/1893|35/630||,GT|upstream_gene_variant|MODIFIER|ndx-7|WBGene00003584|transcript|C43E11.7.1|protein_coding||c.-4750dupA|||||4749|,GT|upstream_gene_variant|MODIFIER|tufm-2|WBGene00007001|transcript|C43E11.4.1|protein_coding||c.-286_-285insT|||||278|,GT|upstream_gene_variant|MOD…	PRDE1	1	I	4247475	G	GT	exoc-7	HIGH	frameshift_variant	OTHER	TRUE	FALSE	14	3	17	14,3	1	Insertion	0.176471
TA|frameshift_variant|HIGH|met-1|WBGene00016603|transcript|C43E11.3a.1|protein_coding|9/14|c.2118dupA|p.Gly707fs|2215/5284|2119/4815|707/1604||INFO_REALIGN_3_PRIME,TA|frameshift_variant|HIGH|met-1|WBGene00016603|transcript|C43E11.3b.1|protein_coding|9/14|c.2076dupA|p.Gly693fs|2124/5193|2077/4773|693/1590||INFO_REALIGN_3_PRIME,TA|downstream_gene_variant|MODIFIER|C43E11.12|WBGene00016609|transcript…	PRDE1	1	I	4258959	T	TA	met-1	HIGH	frameshift_variant	OTHER	TRUE	FALSE	57	17	74	57,17	1	Insertion	0.22973
CT|frameshift_variant|HIGH|cdc-6|WBGene00000382|transcript|C43E11.10.1|protein_coding|5/5|c.1153dupA|p.Ser385fs|1153/1754|1153/1557|385/518||,CT|upstream_gene_variant|MODIFIER|C43E11.9|WBGene00016607|transcript|C43E11.9.1|protein_coding||c.-704dupA|||||704|,CT|upstream_gene_variant|MODIFIER|acin-1|WBGene00016601|transcript|C43E11.1.1|protein_coding||c.-2065_-2064insT|||||2026|,CT|downstream_gene_…	PRDE1	1	I	4268670	C	CT	cdc-6	HIGH	frameshift_variant	OTHER	TRUE	FALSE	24	4	28	24,4	1	Insertion	0.142857
GT|frameshift_variant|HIGH|Y47D9A.1|WBGene00021628|transcript|Y47D9A.1a.1|protein_coding|3/7|c.179dupT|p.Ser62fs|254/1558|180/1206|60/401||INFO_REALIGN_3_PRIME,GT|frameshift_variant|HIGH|Y47D9A.1|WBGene00021628|transcript|Y47D9A.1b.1|protein_coding|3/7|c.158dupT|p.Ser55fs|449/1753|159/1185|53/394||INFO_REALIGN_3_PRIME,GT|downstream_gene_variant|MODIFIER|scpl-3|WBGene00021629|transcript|Y47D9A.2a.…	PRDE1	1	I	4305635	G	GT	Y47D9A.1	HIGH	frameshift_variant	OTHER	TRUE	FALSE	17	4	21	17,4	1	Insertion	0.190476
CA|frameshift_variant|HIGH|Y47D9A.1|WBGene00021628|transcript|Y47D9A.1a.1|protein_coding|4/7|c.300dupA|p.Gln101fs|375/1558|301/1206|101/401||INFO_REALIGN_3_PRIME,CA|frameshift_variant|HIGH|Y47D9A.1|WBGene00021628|transcript|Y47D9A.1b.1|protein_coding|4/7|c.279dupA|p.Gln94fs|570/1753|280/1185|94/394||INFO_REALIGN_3_PRIME,CA|downstream_gene_variant|MODIFIER|scpl-3|WBGene00021629|transcript|Y47D9A.2…	PRDE1	1	I	4305894	C	CA	Y47D9A.1	HIGH	frameshift_variant	OTHER	TRUE	FALSE	24	4	28	24,4	1	Insertion	0.142857
GT|frameshift_variant|HIGH|C41D11.3|WBGene00016562|transcript|C41D11.3c.1|protein_coding|4/12|c.813dupA|p.Arg272fs|813/3291|813/2766|271/921||,GT|frameshift_variant|HIGH|C41D11.3|WBGene00016562|transcript|C41D11.3d.1|protein_coding|4/12|c.807dupA|p.Arg270fs|807/3277|807/2760|269/919||,GT|frameshift_variant|HIGH|C41D11.3|WBGene00016562|transcript|C41D11.3c.2|protein_coding|4/13|c.813dupA|p.Arg272f…	PRDE1	1	I	4442659	G	GT	C41D11.3	HIGH	frameshift_variant	OTHER	TRUE	FALSE	32	5	37	32,5	1	Insertion	0.135135
GT|frameshift_variant|HIGH|C41D11.3|WBGene00016562|transcript|C41D11.3c.1|protein_coding|4/12|c.765dupA|p.Arg256fs|765/3291|765/2766|255/921||,GT|frameshift_variant|HIGH|C41D11.3|WBGene00016562|transcript|C41D11.3d.1|protein_coding|4/12|c.759dupA|p.Arg254fs|759/3277|759/2760|253/919||,GT|frameshift_variant|HIGH|C41D11.3|WBGene00016562|transcript|C41D11.3c.2|protein_coding|4/13|c.765dupA|p.Arg256f…	PRDE1	1	I	4442707	G	GT	C41D11.3	HIGH	frameshift_variant	OTHER	TRUE	FALSE	24	4	28	24,4	1	Insertion	0.142857
CT|frameshift_variant|HIGH|cps-6|WBGene00000787|transcript|C41D11.8.1|protein_coding|5/5|c.590dupA|p.Met198fs|597/1019|590/927|197/308||,CT|upstream_gene_variant|MODIFIER|C41D11.3|WBGene00016562|transcript|C41D11.3c.1|protein_coding||c.-2657dupA|||||2657|,CT|upstream_gene_variant|MODIFIER|C41D11.3|WBGene00016562|transcript|C41D11.3d.1|protein_coding||c.-2657dupA|||||2657|,CT|upstream_gene_variant…	PRDE1	1	I	4446998	C	CT	cps-6	HIGH	frameshift_variant	OTHER	TRUE	FALSE	24	4	28	24,4	1	Insertion	0.142857
GA|frameshift_variant|HIGH|gcy-28|WBGene00020131|transcript|T01A4.1c.1|protein_coding|1/17|c.745dupA|p.Ser249fs|777/4585|746/3831|249/1276||INFO_REALIGN_3_PRIME,GA|upstream_gene_variant|MODIFIER|gcy-28|WBGene00020131|transcript|T01A4.1a.1|protein_coding||c.-2922_-2921insA|||||2921|,GA|downstream_gene_variant|MODIFIER|T01A4.8|WBGene00220054|transcript|T01A4.8|lincRNA||n.*2210dupT|||||2210|,GA|down…	PRDE1	1	I	4492470	G	GA	gcy-28	HIGH	frameshift_variant	OTHER	TRUE	FALSE	10	7	17	10,7	1	Insertion	0.411765
C|missense_variant|MODERATE|gcy-28|WBGene00020131|transcript|T01A4.1c.1|protein_coding|1/17|c.766T>C|p.Trp256Arg|797/4585|766/3831|256/1276||,C|upstream_gene_variant|MODIFIER|gcy-28|WBGene00020131|transcript|T01A4.1a.1|protein_coding||c.-2895T>C|||||2895|,C|downstream_gene_variant|MODIFIER|T01A4.8|WBGene00220054|transcript|T01A4.8|lincRNA||n.*2184A>G|||||2184|,C|downstream_gene_variant|MODIFIER|T…	PRDE1	1	I	4492497	T	C	gcy-28	MODERATE	missense_variant	MISSENSE	FALSE	FALSE	12	3	15	12,3	1	SNP	0.2
GA|frameshift_variant|HIGH|gcy-28|WBGene00020131|transcript|T01A4.1c.1|protein_coding|8/17|c.1919dupA|p.Ser641fs|1951/4585|1920/3831|640/1276||INFO_REALIGN_3_PRIME,GA|frameshift_variant|HIGH|gcy-28|WBGene00020131|transcript|T01A4.1d.1|protein_coding|11/20|c.1805dupA|p.Ser603fs|1841/3801|1806/3717|602/1238||INFO_REALIGN_3_PRIME,GA|frameshift_variant|HIGH|gcy-28|WBGene00020131|transcript|T01A4.1a.1…	PRDE1	1	I	4502640	G	GA	gcy-28	HIGH	frameshift_variant	OTHER	TRUE	FALSE	68	13	81	68,13	1	Insertion	0.160494
CT|frameshift_variant|HIGH|bet-1|WBGene00022473|transcript|Y119C1B.8a.1|protein_coding|7/14|c.1512dupA|p.Ala505fs|1512/2725|1512/2562|504/853||,CT|frameshift_variant|HIGH|bet-1|WBGene00022473|transcript|Y119C1B.8b.1|protein_coding|7/11|c.1512dupA|p.Ala505fs|1512/2298|1512/2298|504/765||	PRDE1	1	I	4530758	C	CT	bet-1	HIGH	frameshift_variant	OTHER	TRUE	FALSE	26	9	35	26,9	1	Insertion	0.257143
CT|frameshift_variant|HIGH|zig-9|WBGene00022474|transcript|Y119C1B.9.1|protein_coding|3/6|c.288dupA|p.Glu97fs|306/1253|288/852|96/283||,CT|upstream_gene_variant|MODIFIER|bet-1|WBGene00022473|transcript|Y119C1B.8a.1|protein_coding||c.-3946dupA|||||3946|,CT|upstream_gene_variant|MODIFIER|bet-1|WBGene00022473|transcript|Y119C1B.8b.1|protein_coding||c.-3946dupA|||||3946|,CT|downstream_gene_variant|MO…	PRDE1	1	I	4538743	C	CT	zig-9	HIGH	frameshift_variant	OTHER	TRUE	FALSE	9	2	11	9,2	1	Insertion	0.181818
CTT|frameshift_variant|HIGH|D1007.5|WBGene00017003|transcript|D1007.5a.1|protein_coding|4/6|c.759_760dupAA|p.Ser254fs|766/1740|760/1434|254/477||,CTT|frameshift_variant|HIGH|D1007.5|WBGene00017003|transcript|D1007.5b.1|protein_coding|4/6|c.759_760dupAA|p.Ser254fs|766/1695|760/1209|254/402||,CTT|upstream_gene_variant|MODIFIER|D1007.18|WBGene00044421|transcript|D1007.18.1|protein_coding||c.-2788_-2…	PRDE1	1	I	4582472	C	CTT	D1007.5	HIGH	frameshift_variant	OTHER	TRUE	FALSE	8	2	10	8,2	1	Insertion	0.2
CA|frameshift_variant|HIGH|ugt-26|WBGene00015695|transcript|C10H11.6a.1|protein_coding|5/7|c.811dupA|p.Thr271fs|887/1909|812/1590|271/529||INFO_REALIGN_3_PRIME,CA|frameshift_variant|HIGH|ugt-26|WBGene00015695|transcript|C10H11.6b.1|protein_coding|5/7|c.808dupA|p.Thr270fs|809/1831|809/1587|270/528||INFO_REALIGN_3_PRIME,CA|upstream_gene_variant|MODIFIER|ugt-27|WBGene00015694|transcript|C10H11.5.1|p…	PRDE1	1	I	4722465	C	CA	ugt-26	HIGH	frameshift_variant	OTHER	TRUE	FALSE	15	3	18	15,3	1	Insertion	0.166667
CA|frameshift_variant|HIGH|viln-1|WBGene00015691|transcript|C10H11.1.1|protein_coding|8/8|c.2713dupA|p.Thr905fs|3003/3163|2714/2757|905/918||INFO_REALIGN_3_PRIME,CA|downstream_gene_variant|MODIFIER|kca-1|WBGene00015698|transcript|C10H11.10.1|protein_coding||c.*549dupT|||||385|,CA|downstream_gene_variant|MODIFIER|M04F3.6|WBGene00044809|transcript|M04F3.6|pseudogene||n.*2496dupT|||||2496|,CA|downst…	PRDE1	1	I	4759434	C	CA	viln-1	HIGH	frameshift_variant	OTHER	FALSE	FALSE	27	5	32	27,5	1	Insertion	0.15625
G|missense_variant|MODERATE|F28B3.5|WBGene00017886|transcript|F28B3.5a.1|protein_coding|4/6|c.1036C>G|p.Leu346Val|1177/1749|1036/1407|346/468||,G|missense_variant|MODERATE|F28B3.5|WBGene00017886|transcript|F28B3.5b.1|protein_coding|4/4|c.1036C>G|p.Leu346Val|1121/1159|1036/1059|346/352||,G|upstream_gene_variant|MODIFIER|imb-1|WBGene00002075|transcript|F28B3.8.1|protein_coding||c.-1716G>C|||||1678|…	PRDE1	1	I	4927911	C	G	F28B3.5	MODERATE	missense_variant	MISSENSE	FALSE	FALSE	13	2	15	13,2	1	SNP	0.133333
A|missense_variant|MODERATE|F28B3.5|WBGene00017886|transcript|F28B3.5a.1|protein_coding|4/6|c.1037T>A|p.Leu346His|1178/1749|1037/1407|346/468||,A|missense_variant|MODERATE|F28B3.5|WBGene00017886|transcript|F28B3.5b.1|protein_coding|4/4|c.1037T>A|p.Leu346His|1122/1159|1037/1059|346/352||,A|upstream_gene_variant|MODIFIER|imb-1|WBGene00002075|transcript|F28B3.8.1|protein_coding||c.-1717A>T|||||1679|…	PRDE1	1	I	4927912	T	A	F28B3.5	MODERATE	missense_variant	MISSENSE	FALSE	FALSE	13	2	15	13,2	1	SNP	0.133333
T|synonymous_variant|LOW|F28B3.5|WBGene00017886|transcript|F28B3.5a.1|protein_coding|4/6|c.1038C>T|p.Leu346Leu|1179/1749|1038/1407|346/468||,T|synonymous_variant|LOW|F28B3.5|WBGene00017886|transcript|F28B3.5b.1|protein_coding|4/4|c.1038C>T|p.Leu346Leu|1123/1159|1038/1059|346/352||,T|upstream_gene_variant|MODIFIER|imb-1|WBGene00002075|transcript|F28B3.8.1|protein_coding||c.-1718G>A|||||1680|,T|ups…	PRDE1	1	I	4927913	C	T	F28B3.5	LOW	synonymous_variant	SILENT	FALSE	FALSE	13	2	15	13,2	1	SNP	0.133333
CA|frameshift_variant|HIGH|dip-2|WBGene00017885|transcript|F28B3.4b.1|protein_coding|3/16|c.376dupA|p.Ser126fs|380/5440|377/5046|126/1681||INFO_REALIGN_3_PRIME,CA|frameshift_variant|HIGH|dip-2|WBGene00017885|transcript|F28B3.4g.1|protein_coding|3/16|c.376dupA|p.Ser126fs|380/5409|377/5040|126/1679||INFO_REALIGN_3_PRIME,CA|upstream_gene_variant|MODIFIER|dip-2|WBGene00017885|transcript|F28B3.4i.1|pr…	PRDE1	1	I	4935378	C	CA	dip-2	HIGH	frameshift_variant	OTHER	TRUE	FALSE	33	7	40	33,7	1	Insertion	0.175
A|missense_variant|MODERATE|dip-2|WBGene00017885|transcript|F28B3.4b.1|protein_coding|12/16|c.2131G>A|p.Ala711Thr|2134/5440|2131/5046|711/1681||,A|missense_variant|MODERATE|dip-2|WBGene00017885|transcript|F28B3.4g.1|protein_coding|12/16|c.2125G>A|p.Ala709Thr|2128/5409|2125/5040|709/1679||,A|missense_variant|MODERATE|dip-2|WBGene00017885|transcript|F28B3.4i.1|protein_coding|10/14|c.2053G>A|p.Ala68…	PRDE1	1	I	4945432	G	A	dip-2	MODERATE	missense_variant	MISSENSE	FALSE	FALSE	9	2	11	9,2	1	SNP	0.181818
A|missense_variant|MODERATE|dip-2|WBGene00017885|transcript|F28B3.4b.1|protein_coding|12/16|c.2137C>A|p.Leu713Ile|2140/5440|2137/5046|713/1681||,A|missense_variant|MODERATE|dip-2|WBGene00017885|transcript|F28B3.4g.1|protein_coding|12/16|c.2131C>A|p.Leu711Ile|2134/5409|2131/5040|711/1679||,A|missense_variant|MODERATE|dip-2|WBGene00017885|transcript|F28B3.4i.1|protein_coding|10/14|c.2059C>A|p.Leu68…	PRDE1	1	I	4945438	C	A	dip-2	MODERATE	missense_variant	MISSENSE	FALSE	FALSE	8	2	10	8,2	1	SNP	0.2
CT|frameshift_variant|HIGH|him-1|WBGene00001860|transcript|F28B3.7a.1|protein_coding|7/11|c.2607dupA|p.Glu870fs|2614/4036|2607/3789|869/1262||,CT|upstream_gene_variant|MODIFIER|F28B3.10|WBGene00017889|transcript|F28B3.10.1|protein_coding||c.-3958dupA|||||3953|,CT|upstream_gene_variant|MODIFIER|F28B3.6|WBGene00017887|transcript|F28B3.6.1|protein_coding||c.-2894dupA|||||2882|,CT|upstream_gene_varia…	PRDE1	1	I	4954362	C	CT	him-1	HIGH	frameshift_variant	OTHER	TRUE	FALSE	110	14	124	110,14	1	Insertion	0.112903
CA|frameshift_variant|HIGH|mes-3|WBGene00003221|transcript|F54C1.3a.1|protein_coding|2/15|c.247dupA|p.Thr83fs|253/3081|248/2265|83/754||INFO_REALIGN_3_PRIME,CA|frameshift_variant|HIGH|mes-3|WBGene00003221|transcript|F54C1.3b.1|protein_coding|2/16|c.247dupA|p.Thr83fs|253/2850|248/2103|83/700||INFO_REALIGN_3_PRIME,CA|upstream_gene_variant|MODIFIER|dyf-1|WBGene00001117|transcript|F54C1.5a.1|protein_…	PRDE1	1	I	4997705	C	CA	mes-3	HIGH	frameshift_variant	OTHER	TRUE	FALSE	28	5	33	28,5	1	Insertion	0.151515
G|frameshift_variant|HIGH|mes-3|WBGene00003221|transcript|F54C1.3a.1|protein_coding|4/15|c.515delA|p.Lys172fs|520/3081|515/2265|172/754||INFO_REALIGN_3_PRIME,G|frameshift_variant|HIGH|mes-3|WBGene00003221|transcript|F54C1.3b.1|protein_coding|4/16|c.515delA|p.Lys172fs|520/2850|515/2103|172/700||INFO_REALIGN_3_PRIME,G|upstream_gene_variant|MODIFIER|dyf-1|WBGene00001117|transcript|F54C1.5a.1|protein…	PRDE1	1	I	4998088	GA	G	mes-3	HIGH	frameshift_variant	OTHER	TRUE	FALSE	8	2	10	8,2	1	Deletion	0.2
GA|frameshift_variant|HIGH|lfe-2|WBGene00002979|transcript|C46H11.4a.1|protein_coding|4/6|c.904dupA|p.Met302fs|905/1869|905/1485|302/494||INFO_REALIGN_3_PRIME,GA|frameshift_variant|HIGH|lfe-2|WBGene00002979|transcript|C46H11.4d.1|protein_coding|7/9|c.769dupA|p.Met257fs|770/1734|770/1350|257/449||INFO_REALIGN_3_PRIME,GA|frameshift_variant|HIGH|lfe-2|WBGene00002979|transcript|C46H11.4c.1|protein_co…	PRDE1	1	I	5039063	G	GA	lfe-2	HIGH	frameshift_variant	OTHER	TRUE	FALSE	35	5	40	35,5	1	Insertion	0.125
G|synonymous_variant|LOW|lfe-2|WBGene00002979|transcript|C46H11.4a.1|protein_coding|5/6|c.1074A>G|p.Lys358Lys|1074/1869|1074/1485|358/494||,G|synonymous_variant|LOW|lfe-2|WBGene00002979|transcript|C46H11.4d.1|protein_coding|8/9|c.939A>G|p.Lys313Lys|939/1734|939/1350|313/449||,G|synonymous_variant|LOW|lfe-2|WBGene00002979|transcript|C46H11.4c.1|protein_coding|9/10|c.975A>G|p.Lys325Lys|1031/1826|97…	PRDE1	1	I	5039624	A	G	lfe-2	LOW	synonymous_variant	SILENT	FALSE	FALSE	9	2	11	9,2	1	SNP	0.181818
C|missense_variant|MODERATE|C46H11.2|WBGene00016728|transcript|C46H11.2.1|protein_coding|7/8|c.944T>C|p.Ile315Thr|1032/1367|944/1227|315/408||,C|upstream_gene_variant|MODIFIER|phat-2|WBGene00016733|transcript|C46H11.9.1|protein_coding||c.-4002A>G|||||3974|,C|upstream_gene_variant|MODIFIER|C46H11.1|WBGene00016727|transcript|C46H11.1.1|protein_coding||c.-3694T>C|||||3694|,C|downstream_gene_variant|…	PRDE1	1	I	5051992	T	C	C46H11.2	MODERATE	missense_variant	MISSENSE	FALSE	FALSE	9	5	14	9,5	1	SNP	0.357143
GA|frameshift_variant|HIGH|use-1|WBGene00022460|transcript|Y110A7A.11.1|protein_coding|4/7|c.265dupA|p.Ile89fs|355/921|266/765|89/254||INFO_REALIGN_3_PRIME,GA|upstream_gene_variant|MODIFIER|spe-5|WBGene00004959|transcript|Y110A7A.12.1|protein_coding||c.-3511dupT|||||3445|,GA|upstream_gene_variant|MODIFIER|chp-1|WBGene00000502|transcript|Y110A7A.13.1|protein_coding||c.-2001dupT|||||2001|,GA|upstre…	PRDE1	1	I	5106911	G	GA	use-1	HIGH	frameshift_variant	OTHER	TRUE	FALSE	21	6	27	21,6	1	Insertion	0.222222
CT|frameshift_variant|HIGH|Y110A7A.15|WBGene00022462|transcript|Y110A7A.15a.1|protein_coding|2/7|c.129dupA|p.Ala44fs|143/1917|129/1446|43/481||,CT|upstream_gene_variant|MODIFIER|Y110A7A.21|WBGene00045212|transcript|Y110A7A.21.1|protein_coding||c.-2426dupA|||||2405|,CT|upstream_gene_variant|MODIFIER|Y110A7A.15|WBGene00022462|transcript|Y110A7A.15b.1|protein_coding||c.-1986dupA|||||1986|,CT|downstr…	PRDE1	1	I	5113558	C	CT	Y110A7A.15	HIGH	frameshift_variant	OTHER	TRUE	FALSE	41	7	48	41,7	1	Insertion	0.145833
A|synonymous_variant|LOW|mat-1|WBGene00003132|transcript|Y110A7A.17a.1|protein_coding|1/11|c.18G>T|p.Ala6Ala|30/2655|18/2367|6/788||,A|synonymous_variant|LOW|mat-1|WBGene00003132|transcript|Y110A7A.17b.1|protein_coding|1/8|c.18G>T|p.Ala6Ala|30/1029|18/822|6/273||,A|upstream_gene_variant|MODIFIER|prp-31|WBGene00022458|transcript|Y110A7A.8.1|protein_coding||c.-680C>A|||||658|,A|upstream_gene_varian…	PRDE1	1	I	5127170	C	A	mat-1	LOW	synonymous_variant	SILENT	FALSE	FALSE	17	2	19	17,2	1	SNP	0.105263
T|missense_variant|MODERATE|mat-1|WBGene00003132|transcript|Y110A7A.17a.1|protein_coding|1/11|c.17C>A|p.Ala6Glu|29/2655|17/2367|6/788||,T|missense_variant|MODERATE|mat-1|WBGene00003132|transcript|Y110A7A.17b.1|protein_coding|1/8|c.17C>A|p.Ala6Glu|29/1029|17/822|6/273||,T|upstream_gene_variant|MODIFIER|prp-31|WBGene00022458|transcript|Y110A7A.8.1|protein_coding||c.-679G>T|||||657|,T|upstream_gene_…	PRDE1	1	I	5127171	G	T	mat-1	MODERATE	missense_variant	MISSENSE	FALSE	FALSE	17	2	19	17,2	1	SNP	0.105263
GA|frameshift_variant|HIGH|npp-6|WBGene00003792|transcript|F56A3.3a.1|protein_coding|5/16|c.912dupA|p.Gln305fs|913/4878|913/4689|305/1562||INFO_REALIGN_3_PRIME,GA|frameshift_variant|HIGH|npp-6|WBGene00003792|transcript|F56A3.3b.1|protein_coding|5/12|c.912dupA|p.Gln305fs|913/2670|913/2670|305/889||INFO_REALIGN_3_PRIME,GA|frameshift_variant|HIGH|npp-6|WBGene00003792|transcript|F56A3.3a.3|protein_co…	PRDE1	1	I	5177773	G	GA	npp-6	HIGH	frameshift_variant	OTHER	TRUE	FALSE	64	11	75	64,11	1	Insertion	0.146667
T|missense_variant|MODERATE|slx-1|WBGene00018909|transcript|F56A3.2.1|protein_coding|1/8|c.49C>T|p.Pro17Ser|49/1426|49/1332|17/443||,T|upstream_gene_variant|MODIFIER|bro-1|WBGene00000272|transcript|F56A3.5.1|protein_coding||c.-4201C>T|||||4142|,T|downstream_gene_variant|MODIFIER|npp-6|WBGene00003792|transcript|F56A3.3a.1|protein_coding||c.*326C>T|||||137|,T|downstream_gene_variant|MODIFIER|npp-6|…	PRDE1	1	I	5182784	C	T	slx-1	MODERATE	missense_variant	MISSENSE	FALSE	FALSE	8	2	10	8,2	1	SNP	0.2
GA|frameshift_variant|HIGH|mrpl-47|WBGene00015092|transcript|B0261.4a.1|protein_coding|3/5|c.306dupA|p.Ala103fs|417/925|307/705|103/234||INFO_REALIGN_3_PRIME,GA|frameshift_variant|HIGH|mrpl-47|WBGene00015092|transcript|B0261.4b.1|protein_coding|3/5|c.252dupA|p.Ala85fs|417/925|253/651|85/216||INFO_REALIGN_3_PRIME,GA|upstream_gene_variant|MODIFIER|C32E12.4|WBGene00016330|transcript|C32E12.4.1|prote…	PRDE1	1	I	5244796	G	GA	mrpl-47	HIGH	frameshift_variant	OTHER	TRUE	FALSE	54	10	64	54,10	1	Insertion	0.15625
C|missense_variant|MODERATE|mrpl-47|WBGene00015092|transcript|B0261.4a.1|protein_coding|5/5|c.669A>C|p.Arg223Ser|779/925|669/705|223/234||,C|missense_variant|MODERATE|mrpl-47|WBGene00015092|transcript|B0261.4b.1|protein_coding|5/5|c.615A>C|p.Arg205Ser|779/925|615/651|205/216||,C|upstream_gene_variant|MODIFIER|C32E12.4|WBGene00016330|transcript|C32E12.4.1|protein_coding||c.-3381T>G|||||3342|,C|ups…	PRDE1	1	I	5245256	A	C	mrpl-47	MODERATE	missense_variant	MISSENSE	FALSE	FALSE	8	2	10	8,2	1	SNP	0.2
TA|frameshift_variant|HIGH|B0261.1|WBGene00015091|transcript|B0261.1.1|protein_coding|2/9|c.429dupA|p.Arg144fs|444/2618|430/2340|144/779||INFO_REALIGN_3_PRIME,TA|upstream_gene_variant|MODIFIER|B0261.9|WBGene00195057|transcript|B0261.9.1|protein_coding||c.-4231_-4230insA|||||4230|,TA|downstream_gene_variant|MODIFIER|let-363|WBGene00002583|transcript|B0261.2a.1|protein_coding||c.*1198_*1199insA||||…	PRDE1	1	I	5264188	T	TA	B0261.1	HIGH	frameshift_variant	OTHER	TRUE	FALSE	19	4	23	19,4	1	Insertion	0.173913
CT|frameshift_variant|HIGH|F48C1.5|WBGene00018598|transcript|F48C1.5.1|protein_coding|1/3|c.72dupA|p.Asp25fs|86/535|72/375|24/124||,CT|upstream_gene_variant|MODIFIER|let-526|WBGene00002717|transcript|C01G8.9c.1|protein_coding||c.-851dupA|||||647|,CT|upstream_gene_variant|MODIFIER|fbxa-145|WBGene00018595|transcript|F48C1.2.1|protein_coding||c.-1693_-1692insT|||||1681|,CT|upstream_gene_variant|MODI…	PRDE1	1	I	5318038	C	CT	F48C1.5	HIGH	frameshift_variant	OTHER	TRUE	FALSE	17	3	20	17,3	1	Insertion	0.15
CA|frameshift_variant|HIGH|F55A12.5|WBGene00018864|transcript|F55A12.5.1|protein_coding|12/16|c.1807dupA|p.Thr603fs|1809/2705|1808/2508|603/835||INFO_REALIGN_3_PRIME,CA|upstream_gene_variant|MODIFIER|apm-1|WBGene00000150|transcript|F55A12.7.1|protein_coding||c.-3850dupT|||||3830|,CA|upstream_gene_variant|MODIFIER|F55A12.16|WBGene00200300|transcript|F55A12.16|lincRNA||n.-3129dupT|||||3129|,CA|down…	PRDE1	1	I	5348553	C	CA	F55A12.5	HIGH	frameshift_variant	OTHER	TRUE	FALSE	35	11	46	35,11	1	Insertion	0.23913
GA|frameshift_variant|HIGH|F55A12.5|WBGene00018864|transcript|F55A12.5.1|protein_coding|12/16|c.1947dupA|p.Val650fs|1949/2705|1948/2508|650/835||INFO_REALIGN_3_PRIME,GA|upstream_gene_variant|MODIFIER|apm-1|WBGene00000150|transcript|F55A12.7.1|protein_coding||c.-3990dupT|||||3970|,GA|upstream_gene_variant|MODIFIER|F55A12.16|WBGene00200300|transcript|F55A12.16|lincRNA||n.-3269dupT|||||3269|,GA|down…	PRDE1	1	I	5348693	G	GA	F55A12.5	HIGH	frameshift_variant	OTHER	TRUE	FALSE	136	18	154	136,18	1	Insertion	0.116883
C|missense_variant|MODERATE|F55A12.5|WBGene00018864|transcript|F55A12.5.1|protein_coding|12/16|c.2149T>C|p.Phe717Leu|2150/2705|2149/2508|717/835||,C|upstream_gene_variant|MODIFIER|apm-1|WBGene00000150|transcript|F55A12.7.1|protein_coding||c.-4197A>G|||||4177|,C|upstream_gene_variant|MODIFIER|F55A12.16|WBGene00200300|transcript|F55A12.16|lincRNA||n.-3476A>G|||||3476|,C|downstream_gene_variant|MODI…	PRDE1	1	I	5348901	T	C	F55A12.5	MODERATE	missense_variant	MISSENSE	FALSE	FALSE	9	2	11	9,2	1	SNP	0.181818
A|missense_variant|MODERATE|F55A12.5|WBGene00018864|transcript|F55A12.5.1|protein_coding|12/16|c.2150T>A|p.Phe717Tyr|2151/2705|2150/2508|717/835||,A|upstream_gene_variant|MODIFIER|apm-1|WBGene00000150|transcript|F55A12.7.1|protein_coding||c.-4198A>T|||||4178|,A|upstream_gene_variant|MODIFIER|F55A12.16|WBGene00200300|transcript|F55A12.16|lincRNA||n.-3477A>T|||||3477|,A|downstream_gene_variant|MODI…	PRDE1	1	I	5348902	T	A	F55A12.5	MODERATE	missense_variant	MISSENSE	FALSE	FALSE	9	2	11	9,2	1	SNP	0.181818
A|missense_variant|MODERATE|ppk-1|WBGene00004087|transcript|F55A12.3.1|protein_coding|8/13|c.1257G>A|p.Met419Ile|1260/2400|1257/1836|419/611||,A|upstream_gene_variant|MODIFIER|anr-38|WBGene00219703|transcript|F55A12.17|pseudogene||n.-3742C>T|||||3742|,A|upstream_gene_variant|MODIFIER|F55A12.13|WBGene00197234|transcript|F55A12.13|lincRNA||n.-2685C>T|||||2685|,A|upstream_gene_variant|MODIFIER|F55A1…	PRDE1	1	I	5360470	G	A	ppk-1	MODERATE	missense_variant	MISSENSE	FALSE	FALSE	18	4	22	18,4	1	SNP	0.181818
CT|frameshift_variant|HIGH|let-355|WBGene00020263|transcript|T05E8.3.1|protein_coding|2/16|c.299dupA|p.Glu101fs|299/2887|299/2571|100/856||,CT|downstream_gene_variant|MODIFIER|C09D4.4|WBGene00015635|transcript|C09D4.4c.1|protein_coding||c.*862dupA|||||469|,CT|downstream_gene_variant|MODIFIER|C09D4.4|WBGene00015635|transcript|C09D4.4a.1|protein_coding||c.*862dupA|||||469|,CT|downstream_gene_varian…	PRDE1	1	I	5479080	C	CT	let-355	HIGH	frameshift_variant	OTHER	TRUE	FALSE	11	6	17	11,6	1	Insertion	0.352941
CT|frameshift_variant|HIGH|let-355|WBGene00020263|transcript|T05E8.3.1|protein_coding|2/16|c.218dupA|p.Lys74fs|218/2887|218/2571|73/856||,CT|downstream_gene_variant|MODIFIER|C09D4.4|WBGene00015635|transcript|C09D4.4c.1|protein_coding||c.*781dupA|||||388|,CT|downstream_gene_variant|MODIFIER|C09D4.4|WBGene00015635|transcript|C09D4.4a.1|protein_coding||c.*781dupA|||||388|,CT|downstream_gene_variant|…	PRDE1	1	I	5479161	C	CT	let-355	HIGH	frameshift_variant	OTHER	TRUE	FALSE	16	3	19	16,3	1	Insertion	0.157895
CT|frameshift_variant|HIGH|let-355|WBGene00020263|transcript|T05E8.3.1|protein_coding|2/16|c.194dupA|p.Lys66fs|194/2887|194/2571|65/856||,CT|downstream_gene_variant|MODIFIER|C09D4.4|WBGene00015635|transcript|C09D4.4c.1|protein_coding||c.*757dupA|||||364|,CT|downstream_gene_variant|MODIFIER|C09D4.4|WBGene00015635|transcript|C09D4.4a.1|protein_coding||c.*757dupA|||||364|,CT|downstream_gene_variant|…	PRDE1	1	I	5479185	C	CT	let-355	HIGH	frameshift_variant	OTHER	TRUE	FALSE	11	3	14	11,3	1	Insertion	0.214286
C|5_prime_UTR_premature_start_codon_gain_variant|LOW|cey-3|WBGene00000474|transcript|M01E11.5.2|protein_coding|1/3|c.-35C>G||||||,C|5_prime_UTR_variant|MODIFIER|cey-3|WBGene00000474|transcript|M01E11.5.2|protein_coding|1/3|c.-35C>G|||||35|,C|upstream_gene_variant|MODIFIER|pqn-52|WBGene00019713|transcript|M01E11.4c.1|protein_coding||c.-2875C>G|||||2873|,C|upstream_gene_variant|MODIFIER|cey-3|WBGen…	PRDE1	1	I	5572952	G	C	cey-3	LOW	5_prime_UTR_premature_start_codon_gain_variant	OTHER	FALSE	FALSE	15	24	39	15,24	1	SNP	0.615385
CA|frameshift_variant|HIGH|F46F11.1|WBGene00018508|transcript|F46F11.1a.1|protein_coding|7/23|c.989dupA|p.Asn330fs|997/4105|990/3972|330/1323||INFO_REALIGN_3_PRIME,CA|frameshift_variant|HIGH|F46F11.1|WBGene00018508|transcript|F46F11.1b.1|protein_coding|7/21|c.989dupA|p.Asn330fs|997/3806|990/3678|330/1225||INFO_REALIGN_3_PRIME,CA|upstream_gene_variant|MODIFIER|F46F11.8|WBGene00018511|transcript|F4…	PRDE1	1	I	5630561	C	CA	F46F11.1	HIGH	frameshift_variant	OTHER	TRUE	FALSE	9	3	12	9,3	1	Insertion	0.25
T|missense_variant|MODERATE|F55F8.3|WBGene00018891|transcript|F55F8.3.1|protein_coding|10/13|c.2037T>A|p.Asn679Lys|2109/3012|2037/2733|679/910||,T|upstream_gene_variant|MODIFIER|F55F8.2|WBGene00018890|transcript|F55F8.2a.1|protein_coding||c.-1384T>A|||||1377|,T|upstream_gene_variant|MODIFIER|F55F8.2|WBGene00018890|transcript|F55F8.2b|lincRNA||n.-1384T>A|||||1384|,T|downstream_gene_variant|MODIFIE…	PRDE1	1	I	5651033	A	T	F55F8.3	MODERATE	missense_variant	MISSENSE	FALSE	FALSE	25	4	29	25,4	1	SNP	0.137931
G|synonymous_variant|LOW|F55F8.3|WBGene00018891|transcript|F55F8.3.1|protein_coding|7/13|c.855T>C|p.Thr285Thr|927/3012|855/2733|285/910||,G|upstream_gene_variant|MODIFIER|F55F8.2|WBGene00018890|transcript|F55F8.2a.1|protein_coding||c.-2769T>C|||||2762|,G|upstream_gene_variant|MODIFIER|F55F8.2|WBGene00018890|transcript|F55F8.2b|lincRNA||n.-2769T>C|||||2769|,G|downstream_gene_variant|MODIFIER|cir-1…	PRDE1	1	I	5652418	A	G	F55F8.3	LOW	synonymous_variant	SILENT	FALSE	FALSE	9	2	11	9,2	1	SNP	0.181818
A|missense_variant|MODERATE|F55F8.3|WBGene00018891|transcript|F55F8.3.1|protein_coding|7/13|c.854C>T|p.Thr285Ile|926/3012|854/2733|285/910||,A|upstream_gene_variant|MODIFIER|F55F8.2|WBGene00018890|transcript|F55F8.2a.1|protein_coding||c.-2770C>T|||||2763|,A|upstream_gene_variant|MODIFIER|F55F8.2|WBGene00018890|transcript|F55F8.2b|lincRNA||n.-2770C>T|||||2770|,A|downstream_gene_variant|MODIFIER|ci…	PRDE1	1	I	5652419	G	A	F55F8.3	MODERATE	missense_variant	MISSENSE	FALSE	FALSE	9	2	11	9,2	1	SNP	0.181818
CT|frameshift_variant|HIGH|cir-1|WBGene00018892|transcript|F55F8.4.1|protein_coding|4/4|c.1327dupA|p.Arg443fs|1364/1808|1327/1683|443/560||,CT|frameshift_variant|HIGH|cir-1|WBGene00018892|transcript|F55F8.4.2|protein_coding|4/4|c.1327dupA|p.Arg443fs|1354/1822|1327/1683|443/560||,CT|upstream_gene_variant|MODIFIER|F55F8.2|WBGene00018890|transcript|F55F8.2a.1|protein_coding||c.-4623dupA|||||4616|,CT…	PRDE1	1	I	5654271	C	CT	cir-1	HIGH	frameshift_variant	OTHER	TRUE	FALSE	36	8	44	36,8	1	Insertion	0.181818
C|synonymous_variant|LOW|pamn-1|WBGene00020556|transcript|T19B4.1.1|protein_coding|11/13|c.1926T>C|p.Phe642Phe|1928/3090|1926/1992|642/663||,C|upstream_gene_variant|MODIFIER|T19B4.8|WBGene00044930|transcript|T19B4.8|snoRNA||n.-1639T>C|||||1639|,C|downstream_gene_variant|MODIFIER|T19B4.9|WBGene00195448|transcript|T19B4.9|lincRNA||n.*1638A>G|||||1638|	PRDE1	1	I	5705407	T	C	pamn-1	LOW	synonymous_variant	SILENT	FALSE	FALSE	9	2	11	9,2	1	SNP	0.181818
C|missense_variant|MODERATE|pamn-1|WBGene00020556|transcript|T19B4.1.1|protein_coding|11/13|c.1928T>C|p.Val643Ala|1930/3090|1928/1992|643/663||,C|upstream_gene_variant|MODIFIER|T19B4.8|WBGene00044930|transcript|T19B4.8|snoRNA||n.-1637T>C|||||1637|,C|downstream_gene_variant|MODIFIER|T19B4.9|WBGene00195448|transcript|T19B4.9|lincRNA||n.*1636A>G|||||1636|	PRDE1	1	I	5705409	T	C	pamn-1	MODERATE	missense_variant	MISSENSE	FALSE	FALSE	9	2	11	9,2	1	SNP	0.181818
CA|frameshift_variant|HIGH|oxy-5|WBGene00045483|transcript|F56H1.7.1|protein_coding|3/4|c.264dupT|p.Asp89fs|332/687|264/489|88/162||,CA|upstream_gene_variant|MODIFIER|ccpp-1|WBGene00018995|transcript|F56H1.5.1|protein_coding||c.-967dupT|||||942|,CA|upstream_gene_variant|MODIFIER|dhhc-11|WBGene00020694|transcript|T22E7.2.1|protein_coding||c.-2367_-2366insA|||||2285|	PRDE1	1	I	5761744	C	CA	oxy-5	HIGH	frameshift_variant	OTHER	TRUE	FALSE	15	5	20	15,5	1	Insertion	0.25
TA|frameshift_variant|HIGH|hil-5|WBGene00001856|transcript|B0414.3.1|protein_coding|2/2|c.270dupA|p.Gly91fs|307/867|271/678|91/225||INFO_REALIGN_3_PRIME,TA|upstream_gene_variant|MODIFIER|rnt-1|WBGene00004393|transcript|B0414.2.2|protein_coding||c.-1497_-1496insA|||||1110|,TA|downstream_gene_variant|MODIFIER|lron-8|WBGene00020693|transcript|T22E7.1a.1|protein_coding||c.*1589_*1590insA|||||1417|,TA…	PRDE1	1	I	5775043	T	TA	hil-5	HIGH	frameshift_variant	OTHER	TRUE	FALSE	120	21	141	120,21	1	Insertion	0.148936
GT|frameshift_variant|HIGH|cpb-3|WBGene00000772|transcript|B0414.5.1|protein_coding|2/6|c.788dupA|p.Asn263fs|817/2803|788/2238|263/745||,GT|downstream_gene_variant|MODIFIER|rnt-1|WBGene00004393|transcript|B0414.2.1|protein_coding||c.*2499_*2500insT|||||2279|,GT|downstream_gene_variant|MODIFIER|glh-3|WBGene00001600|transcript|B0414.6.1|protein_coding||c.*1692dupA|||||1435|,GT|downstream_gene_varia…	PRDE1	1	I	5790888	G	GT	cpb-3	HIGH	frameshift_variant	OTHER	TRUE	FALSE	64	12	76	64,12	1	Insertion	0.157895
GT|frameshift_variant|HIGH|mtk-1|WBGene00003472|transcript|B0414.7b.1|protein_coding|10/15|c.2722dupA|p.Thr908fs|2735/4436|2722/4263|908/1420||,GT|frameshift_variant|HIGH|mtk-1|WBGene00003472|transcript|B0414.7a.1|protein_coding|10/15|c.2722dupA|p.Thr908fs|2735/4430|2722/4257|908/1418||,GT|upstream_gene_variant|MODIFIER|glh-3|WBGene00001600|transcript|B0414.6.1|protein_coding||c.-2434dupA|||||236…	PRDE1	1	I	5797474	G	GT	mtk-1	HIGH	frameshift_variant	OTHER	TRUE	FALSE	27	4	31	27,4	1	Insertion	0.129032
CT|frameshift_variant|HIGH|mtk-1|WBGene00003472|transcript|B0414.7b.1|protein_coding|3/15|c.194dupA|p.Ser66fs|207/4436|194/4263|65/1420||,CT|frameshift_variant|HIGH|mtk-1|WBGene00003472|transcript|B0414.7a.1|protein_coding|3/15|c.194dupA|p.Ser66fs|207/4430|194/4257|65/1418||,CT|upstream_gene_variant|MODIFIER|srz-4|WBGene00015175|transcript|B0414.1.1|protein_coding||c.-929_-928insT|||||928|,CT|dow…	PRDE1	1	I	5800943	C	CT	mtk-1	HIGH	frameshift_variant	OTHER	FALSE	FALSE	22	5	27	22,5	1	Insertion	0.185185
A|missense_variant|MODERATE|lin-35|WBGene00003020|transcript|C32F10.2.1|protein_coding|10/10|c.2615C>A|p.Thr872Lys|2636/3215|2615/2886|872/961||,A|downstream_gene_variant|MODIFIER|hmg-3|WBGene00001973|transcript|C32F10.5.1|protein_coding||c.*701G>T|||||551|,A|downstream_gene_variant|MODIFIER|nhr-2|WBGene00003601|transcript|C32F10.6.1|protein_coding||c.*3814G>T|||||3419|	PRDE1	1	I	5815058	C	A	lin-35	MODERATE	missense_variant	MISSENSE	FALSE	FALSE	13	2	15	13,2	1	SNP	0.133333
A|synonymous_variant|LOW|lin-35|WBGene00003020|transcript|C32F10.2.1|protein_coding|10/10|c.2616G>A|p.Thr872Thr|2637/3215|2616/2886|872/961||,A|downstream_gene_variant|MODIFIER|hmg-3|WBGene00001973|transcript|C32F10.5.1|protein_coding||c.*700C>T|||||550|,A|downstream_gene_variant|MODIFIER|nhr-2|WBGene00003601|transcript|C32F10.6.1|protein_coding||c.*3813C>T|||||3418|	PRDE1	1	I	5815059	G	A	lin-35	LOW	synonymous_variant	SILENT	FALSE	FALSE	13	2	15	13,2	1	SNP	0.133333
C|frameshift_variant|HIGH|obr-4|WBGene00016331|transcript|C32F10.1a.1|protein_coding|1/10|c.21delA|p.Lys7fs|30/2366|21/2031|7/676||INFO_REALIGN_3_PRIME,C|frameshift_variant|HIGH|obr-4|WBGene00016331|transcript|C32F10.1a.2|protein_coding|1/10|c.21delA|p.Lys7fs|349/2688|21/2031|7/676||INFO_REALIGN_3_PRIME,C|upstream_gene_variant|MODIFIER|C32F10.8|WBGene00016333|transcript|C32F10.8a.1|protein_coding…	PRDE1	1	I	5829416	CA	C	obr-4	HIGH	frameshift_variant	OTHER	FALSE	FALSE	9	2	11	9,2	1	Deletion	0.181818
GT|frameshift_variant|HIGH|hpo-3|WBGene00018006|transcript|F33D11.9b.1|protein_coding|8/8|c.1990dupA|p.Thr664fs|1990/2223|1990/2031|664/676||,GT|frameshift_variant|HIGH|hpo-3|WBGene00018006|transcript|F33D11.9d.1|protein_coding|8/8|c.1942dupA|p.Thr648fs|1944/2177|1942/1983|648/660||,GT|frameshift_variant|HIGH|hpo-3|WBGene00018006|transcript|F33D11.9i.1|protein_coding|2/2|c.478dupA|p.Thr160fs|503/…	PRDE1	1	I	5857780	G	GT	hpo-3	HIGH	frameshift_variant	OTHER	TRUE	FALSE	63	14	77	63,14	1	Insertion	0.181818
G|frameshift_variant|HIGH|pgp-2|WBGene00003996|transcript|C34G6.4b.1|protein_coding|13/15|c.3420delT|p.Phe1140fs|3432/4206|3420/3891|1140/1296||INFO_REALIGN_3_PRIME,G|frameshift_variant|HIGH|pgp-2|WBGene00003996|transcript|C34G6.4a.1|protein_coding|12/14|c.3348delT|p.Phe1116fs|3360/4165|3348/3819|1116/1272||INFO_REALIGN_3_PRIME,G|frameshift_variant|HIGH|pgp-2|WBGene00003996|transcript|C34G6.4c.1|…	PRDE1	1	I	5895049	GT	G	pgp-2	HIGH	frameshift_variant	OTHER	TRUE	FALSE	11	2	13	11,2	1	Deletion	0.153846
AT|frameshift_variant|HIGH|stam-1|WBGene00004109|transcript|C34G6.7a.1|protein_coding|5/7|c.591dupA|p.Ser198fs|647/1586|591/1374|197/457||,AT|frameshift_variant|HIGH|stam-1|WBGene00004109|transcript|C34G6.7a.2|protein_coding|5/7|c.591dupA|p.Ser198fs|641/1580|591/1374|197/457||,AT|frameshift_variant|HIGH|stam-1|WBGene00004109|transcript|C34G6.7b.1|protein_coding|4/5|c.567dupA|p.Ser190fs|585/1614|5…	PRDE1	1	I	5903305	A	AT	stam-1	HIGH	frameshift_variant	OTHER	TRUE	FALSE	35	6	41	35,6	1	Insertion	0.146341
CA|frameshift_variant|HIGH|usp-5|WBGene00020839|transcript|T27A3.2.1|protein_coding|14/14|c.2333dupA|p.Leu779fs|2339/2590|2334/2370|778/789||INFO_REALIGN_3_PRIME,CA|upstream_gene_variant|MODIFIER|T27A3.7|WBGene00020843|transcript|T27A3.7.1|protein_coding||c.-4618dupT|||||4601|,CA|upstream_gene_variant|MODIFIER|T27A3.7|WBGene00020843|transcript|T27A3.7.2|protein_coding||c.-4633dupT|||||4625|	PRDE1	1	I	6114279	C	CA	usp-5	HIGH	frameshift_variant	OTHER	FALSE	FALSE	24	6	30	24,6	1	Insertion	0.2
CA|frameshift_variant|HIGH|T05E7.3|WBGene00020259|transcript|T05E7.3.1|protein_coding|5/14|c.1222dupA|p.Thr408fs|1236/3187|1223/2994|408/997||INFO_REALIGN_3_PRIME,CA|frameshift_variant|HIGH|T05E7.3|WBGene00020259|transcript|T05E7.3.2|protein_coding|5/14|c.1222dupA|p.Thr408fs|1238/3189|1223/2994|408/997||INFO_REALIGN_3_PRIME,CA|downstream_gene_variant|MODIFIER|T09B4.2|WBGene00020376|transcript|T09…	PRDE1	1	I	6189726	C	CA	T05E7.3	HIGH	frameshift_variant	OTHER	TRUE	FALSE	12	3	15	12,3	1	Insertion	0.2
CT|frameshift_variant|HIGH|mrpl-23|WBGene00020348|transcript|T08B2.8.1|protein_coding|2/2|c.276dupA|p.Ala93fs|277/573|276/480|92/159||,CT|upstream_gene_variant|MODIFIER|ech-1.2|WBGene00020347|transcript|T08B2.7a.1|protein_coding||c.-459dupA|||||411|,CT|upstream_gene_variant|MODIFIER|T08B2.14|WBGene00197441|transcript|T08B2.14|lincRNA||n.-1130_-1129insT|||||1129|,CT|upstream_gene_variant|MODIFIER|…	PRDE1	1	I	6211565	C	CT	mrpl-23	HIGH	frameshift_variant	OTHER	TRUE	FALSE	83	13	96	83,13	1	Insertion	0.135417
A|missense_variant|MODERATE|cebp-2|WBGene00016754|transcript|C48E7.11.1|protein_coding|2/3|c.106C>A|p.Gln36Lys|108/411|106/303|36/100||,A|missense_variant|MODERATE|cebp-2|WBGene00016754|transcript|C48E7.11.2|protein_coding|2/3|c.106C>A|p.Gln36Lys|204/507|106/303|36/100||,A|upstream_gene_variant|MODIFIER|spp-15|WBGene00005000|transcript|C48E7.10.1|protein_coding||c.-3192G>T|||||3037|,A|upstream_ge…	PRDE1	1	I	6253234	C	A	cebp-2	MODERATE	missense_variant	MISSENSE	FALSE	FALSE	36	8	44	36,8	1	SNP	0.181818
CA|frameshift_variant|HIGH|let-611|WBGene00016750|transcript|C48E7.2.1|protein_coding|5/8|c.756dupA|p.Glu253fs|764/1913|757/1635|253/544||INFO_REALIGN_3_PRIME,CA|frameshift_variant|HIGH|let-611|WBGene00016750|transcript|C48E7.2.2|protein_coding|5/9|c.756dupA|p.Glu253fs|764/1742|757/1635|253/544||INFO_REALIGN_3_PRIME,CA|upstream_gene_variant|MODIFIER|C48E7.1|WBGene00016749|transcript|C48E7.1.1|pro…	PRDE1	1	I	6256417	C	CA	let-611	HIGH	frameshift_variant	OTHER	TRUE	FALSE	39	10	49	39,10	1	Insertion	0.204082
CA|frameshift_variant|HIGH|gld-2|WBGene00001596|transcript|ZC308.1a.1|protein_coding|16/19|c.2691dupA|p.Ala898fs|2787/4066|2692/3342|898/1113||INFO_REALIGN_3_PRIME,CA|frameshift_variant|HIGH|gld-2|WBGene00001596|transcript|ZC308.1e.1|protein_coding|15/18|c.1893dupA|p.Ala632fs|2661/3940|1894/2544|632/847||INFO_REALIGN_3_PRIME,CA|frameshift_variant|HIGH|gld-2|WBGene00001596|transcript|ZC308.1c.1|pr…	PRDE1	1	I	6384233	C	CA	gld-2	HIGH	frameshift_variant	OTHER	TRUE	FALSE	17	4	21	17,4	1	Insertion	0.190476
GA|frameshift_variant|HIGH|npp-12|WBGene00003798|transcript|T23H2.1.1|protein_coding|7/15|c.2466dupA|p.Gly823fs|2495/5908|2467/5544|823/1847||INFO_REALIGN_3_PRIME,GA|upstream_gene_variant|MODIFIER|T23H2.3|WBGene00020742|transcript|T23H2.3.1|protein_coding||c.-3628dupT|||||3627|,GA|downstream_gene_variant|MODIFIER|mam-8|WBGene00020743|transcript|T23H2.4.1|protein_coding||c.*3890dupT|||||3783|	PRDE1	1	I	6450091	G	GA	npp-12	HIGH	frameshift_variant	OTHER	TRUE	FALSE	9	3	12	9,3	1	Insertion	0.25
CT|frameshift_variant|HIGH|rab-10|WBGene00004273|transcript|T23H2.5.1|protein_coding|2/4|c.170dupA|p.Ile58fs|177/696|170/606|57/201||,CT|frameshift_variant|HIGH|rab-10|WBGene00004273|transcript|T23H2.5.2|protein_coding|2/4|c.170dupA|p.Ile58fs|177/917|170/606|57/201||,CT|upstream_gene_variant|MODIFIER|mam-8|WBGene00020743|transcript|T23H2.4.1|protein_coding||c.-1322dupA|||||1264|,CT|upstream_gene_…	PRDE1	1	I	6458247	C	CT	rab-10	HIGH	frameshift_variant	OTHER	TRUE	FALSE	93	16	109	93,16	1	Insertion	0.146789
GA|frameshift_variant|HIGH|knl-2|WBGene00019432|transcript|K06A5.4.1|protein_coding|4/10|c.708dupA|p.Val237fs|903/3018|709/2634|237/877||INFO_REALIGN_3_PRIME,GA|upstream_gene_variant|MODIFIER|mam-8|WBGene00020743|transcript|T23H2.4.1|protein_coding||c.-4861dupT|||||4803|,GA|upstream_gene_variant|MODIFIER|rab-10|WBGene00004273|transcript|T23H2.5.1|protein_coding||c.-3315dupT|||||3308|,GA|upstream_…	PRDE1	1	I	6461786	G	GA	knl-2	HIGH	frameshift_variant	OTHER	TRUE	FALSE	18	4	22	18,4	1	Insertion	0.181818
CA|frameshift_variant|HIGH|K06A5.1|WBGene00019429|transcript|K06A5.1b.1|protein_coding|3/7|c.415dupA|p.Arg139fs|430/2190|416/2091|139/696||INFO_REALIGN_3_PRIME,CA|frameshift_variant|HIGH|K06A5.1|WBGene00019429|transcript|K06A5.1a.1|protein_coding|3/7|c.214dupA|p.Arg72fs|671/2431|215/1890|72/629||INFO_REALIGN_3_PRIME,CA|5_prime_UTR_variant|MODIFIER|K06A5.1|WBGene00019429|transcript|K06A5.1c.1|prot…	PRDE1	1	I	6474416	C	CA	K06A5.1	HIGH	frameshift_variant	OTHER	TRUE	FALSE	33	6	39	33,6	1	Insertion	0.153846
AT|frameshift_variant|HIGH|T10E9.1|WBGene00020411|transcript|T10E9.1.1|protein_coding|2/5|c.475dupT|p.Trp159fs|476/1268|476/1170|159/389||INFO_REALIGN_3_PRIME,AT|upstream_gene_variant|MODIFIER|T10E9.8|WBGene00020418|transcript|T10E9.8.1|protein_coding||c.-4567dupA|||||4560|,AT|upstream_gene_variant|MODIFIER|21ur-14742|WBGene00165439|transcript|T10E9.10|pseudogene||n.-1101_-1100insT|||||1100|,AT|u…	PRDE1	1	I	6545621	A	AT	T10E9.1	HIGH	frameshift_variant	OTHER	TRUE	FALSE	42	8	50	42,8	1	Insertion	0.16
CT|frameshift_variant|HIGH|F57B10.8|WBGene00019005|transcript|F57B10.8.1|protein_coding|1/6|c.20dupA|p.Lys8fs|106/1050|20/807|7/268||,CT|frameshift_variant|HIGH|F57B10.8|WBGene00019005|transcript|F57B10.8.2|protein_coding|1/6|c.20dupA|p.Lys8fs|67/1011|20/807|7/268||,CT|frameshift_variant|HIGH|F57B10.8|WBGene00019005|transcript|F57B10.8.3|protein_coding|1/6|c.20dupA|p.Lys8fs|117/1061|20/807|7/268|…	PRDE1	1	I	6550330	C	CT	F57B10.8	HIGH	frameshift_variant	OTHER	FALSE	FALSE	23	5	28	23,5	1	Insertion	0.178571
CA|frameshift_variant|HIGH|tre-1|WBGene00006607|transcript|F57B10.7.1|protein_coding|7/9|c.1059dupA|p.Val354fs|1232/2168|1060/1704|354/567||INFO_REALIGN_3_PRIME,CA|upstream_gene_variant|MODIFIER|spg-20|WBGene00019006|transcript|F57B10.9.1|protein_coding||c.-4767dupT|||||4714|,CA|upstream_gene_variant|MODIFIER|ucr-11|WBGene00019007|transcript|F57B10.14.1|protein_coding||c.-4008dupT|||||4000|,CA|up…	PRDE1	1	I	6557378	C	CA	tre-1	HIGH	frameshift_variant	OTHER	TRUE	FALSE	69	13	82	69,13	1	Insertion	0.158537
GA|frameshift_variant|HIGH|xpg-1|WBGene00019004|transcript|F57B10.6.1|protein_coding|5/9|c.1138dupA|p.Arg380fs|1143/2514|1139/2463|380/820||INFO_REALIGN_3_PRIME,GA|upstream_gene_variant|MODIFIER|21ur-14797|WBGene00173303|transcript|F57B10.15|pseudogene||n.-1910_-1909insA|||||1909|,GA|upstream_gene_variant|MODIFIER|F57B10.5|WBGene00019003|transcript|F57B10.5.1|protein_coding||c.-1968_-1967insA||||…	PRDE1	1	I	6560739	G	GA	xpg-1	HIGH	frameshift_variant	OTHER	TRUE	FALSE	32	4	36	32,4	1	Insertion	0.111111
CA|frameshift_variant|HIGH|F57B10.4|WBGene00019002|transcript|F57B10.4.1|protein_coding|4/10|c.384dupA|p.His129fs|385/2215|385/2076|129/691||INFO_REALIGN_3_PRIME,CA|upstream_gene_variant|MODIFIER|bag-1|WBGene00000236|transcript|F57B10.11.1|protein_coding||c.-2239dupT|||||2237|,CA|upstream_gene_variant|MODIFIER|mei-2|WBGene00003184|transcript|F57B10.12.1|protein_coding||c.-838dupT|||||820|,CA|upst…	PRDE1	1	I	6566687	C	CA	F57B10.4	HIGH	frameshift_variant	OTHER	TRUE	FALSE	48	8	56	48,8	1	Insertion	0.142857
CA|frameshift_variant|HIGH|let-607|WBGene00002783|transcript|F57B10.1.1|protein_coding|6/8|c.1038dupA|p.Leu347fs|1166/2890|1039/2073|347/690||INFO_REALIGN_3_PRIME,CA|frameshift_variant|HIGH|let-607|WBGene00002783|transcript|F57B10.1.2|protein_coding|5/7|c.1038dupA|p.Leu347fs|1255/3339|1039/2073|347/690||INFO_REALIGN_3_PRIME,CA|upstream_gene_variant|MODIFIER|F48A9.4|WBGene00197712|transcript|F48A9…	PRDE1	1	I	6583250	C	CA	let-607	HIGH	frameshift_variant	OTHER	TRUE	FALSE	28	5	33	28,5	1	Insertion	0.151515
CA|frameshift_variant|HIGH|F48A9.2|WBGene00018582|transcript|F48A9.2.1|protein_coding|5/10|c.578dupA|p.Asn194fs|613/2374|579/2265|193/754||INFO_REALIGN_3_PRIME,CA|downstream_gene_variant|MODIFIER|F48A9.5|WBGene00199463|transcript|F48A9.5|lincRNA||n.*2417_*2418insA|||||2418|,CA|downstream_gene_variant|MODIFIER|maco-1|WBGene00017066|transcript|D2092.5.1|protein_coding||c.*5336dupT|||||4332|,CA|down…	PRDE1	1	I	6594648	C	CA	F48A9.2	HIGH	frameshift_variant	OTHER	TRUE	FALSE	8	2	10	8,2	1	Insertion	0.2
CT|frameshift_variant|HIGH|ppfr-2|WBGene00017064|transcript|D2092.2.1|protein_coding|3/6|c.332dupA|p.Lys112fs|340/1476|332/1137|111/378||,CT|upstream_gene_variant|MODIFIER|acr-11|WBGene00000050|transcript|D2092.3.1|protein_coding||c.-1459dupA|||||1459|,CT|upstream_gene_variant|MODIFIER|21ur-13226|WBGene00170698|transcript|D2092.11|pseudogene||n.-16dupA|||||16|,CT|downstream_gene_variant|MODIFIER|…	PRDE1	1	I	6626352	C	CT	ppfr-2	HIGH	frameshift_variant	OTHER	TRUE	FALSE	24	4	28	24,4	1	Insertion	0.142857
CT|frameshift_variant|HIGH|pqn-21|WBGene00004111|transcript|C37A2.5b.1|protein_coding|8/12|c.1494dupA|p.Glu499fs|1498/2965|1494/2421|498/806||,CT|frameshift_variant|HIGH|pqn-21|WBGene00004111|transcript|C37A2.5d.1|protein_coding|5/9|c.576dupA|p.Glu193fs|576/2025|576/1503|192/500||,CT|frameshift_variant|HIGH|pqn-21|WBGene00004111|transcript|C37A2.5c.1|protein_coding|7/11|c.1023dupA|p.Glu342fs|1023…	PRDE1	1	I	6776419	C	CT	pqn-21	HIGH	frameshift_variant	OTHER	TRUE	FALSE	8	2	10	8,2	1	Insertion	0.2
G|5_prime_UTR_premature_start_codon_gain_variant|LOW|ahcy-1|WBGene00019322|transcript|K02F2.2.2|protein_coding|1/3|c.-19C>G||||||,G|5_prime_UTR_variant|MODIFIER|ahcy-1|WBGene00019322|transcript|K02F2.2.2|protein_coding|1/3|c.-19C>G|||||19|,G|upstream_gene_variant|MODIFIER|ahcy-1|WBGene00019322|transcript|K02F2.2.1|protein_coding||c.-19C>G|||||3|,G|upstream_gene_variant|MODIFIER|dpf-3|WBGene000010…	PRDE1	1	I	6836466	C	G	ahcy-1	LOW	5_prime_UTR_premature_start_codon_gain_variant	OTHER	FALSE	FALSE	8	22	30	8,22	1	SNP	0.733333
G|stop_gained|HIGH|dpf-3|WBGene00001056|transcript|K02F2.1a.1|protein_coding|1/20|c.65C>G|p.Ser22*|65/3039|65/2796|22/931||,G|stop_gained|HIGH|dpf-3|WBGene00001056|transcript|K02F2.1b.1|protein_coding|1/20|c.65C>G|p.Ser22*|65/3027|65/2784|22/927||,G|downstream_gene_variant|MODIFIER|teg-4|WBGene00019323|transcript|K02F2.3.1|protein_coding||c.*4016C>G|||||3731|,G|downstream_gene_variant|MODIFIER|K0…	PRDE1	1	I	6838418	C	G	dpf-3	HIGH	stop_gained	NONSENSE	TRUE	TRUE	20	3	23	20,3	1	SNP	0.130435
TA|frameshift_variant|HIGH|dpf-3|WBGene00001056|transcript|K02F2.1a.1|protein_coding|19/20|c.2637dupA|p.Gly880fs|2638/3039|2638/2796|880/931||INFO_REALIGN_3_PRIME,TA|frameshift_variant|HIGH|dpf-3|WBGene00001056|transcript|K02F2.1b.1|protein_coding|19/20|c.2625dupA|p.Gly876fs|2626/3027|2626/2784|876/927||INFO_REALIGN_3_PRIME,TA|upstream_gene_variant|MODIFIER|dpy-14|WBGene00001075|transcript|H27M09…	PRDE1	1	I	6842781	T	TA	dpf-3	HIGH	frameshift_variant	OTHER	TRUE	FALSE	41	13	54	41,13	1	Insertion	0.240741
GA|frameshift_variant|HIGH|rpb-5|WBGene00019246|transcript|H27M09.2.1|protein_coding|2/3|c.158dupA|p.Pro54fs|174/858|159/636|53/211||INFO_REALIGN_3_PRIME,GA|upstream_gene_variant|MODIFIER|H27M09.5|WBGene00019248|transcript|H27M09.5.1|protein_coding||c.-3668dupT|||||3668|,GA|upstream_gene_variant|MODIFIER|H27M09.6|WBGene00194992|transcript|H27M09.6|snRNA||n.-3317dupT|||||3317|,GA|upstream_gene_var…	PRDE1	1	I	6850619	G	GA	rpb-5	HIGH	frameshift_variant	OTHER	TRUE	FALSE	54	8	62	54,8	1	Insertion	0.129032
CT|frameshift_variant|HIGH|hrde-4|WBGene00020403|transcript|T10B11.7a.1|protein_coding|5/11|c.469dupA|p.Ser157fs|510/2267|469/1638|157/545||,CT|frameshift_variant|HIGH|hrde-4|WBGene00020403|transcript|T10B11.7b.1|protein_coding|4/10|c.358dupA|p.Ser120fs|358/2066|358/1527|120/508||,CT|upstream_gene_variant|MODIFIER|T10B11.6|WBGene00020402|transcript|T10B11.6.1|protein_coding||c.-2594dupA|||||2594|…	PRDE1	1	I	6947951	C	CT	hrde-4	HIGH	frameshift_variant	OTHER	TRUE	FALSE	8	2	10	8,2	1	Insertion	0.2
CA|frameshift_variant|HIGH|ctg-1|WBGene00010370|transcript|H06O01.3a.1|protein_coding|6/8|c.815dupA|p.Ala273fs|1093/1553|816/1152|272/383||INFO_REALIGN_3_PRIME,CA|frameshift_variant|HIGH|ctg-1|WBGene00010370|transcript|H06O01.3b.1|protein_coding|7/9|c.530dupA|p.Ala178fs|829/1274|531/867|177/288||INFO_REALIGN_3_PRIME,CA|frameshift_variant|HIGH|ctg-1|WBGene00010370|transcript|H06O01.3c.1|protein_co…	PRDE1	1	I	7008395	C	CA	ctg-1	HIGH	frameshift_variant	OTHER	TRUE	FALSE	68	16	84	68,16	1	Insertion	0.190476
CT|frameshift_variant|HIGH|chd-1|WBGene00010369|transcript|H06O01.2.1|protein_coding|7/11|c.3231dupA|p.Ala1078fs|3235/4757|3231/4386|1077/1461||,CT|upstream_gene_variant|MODIFIER|H06O01.5|WBGene00271648|transcript|H06O01.5|lincRNA||n.-2008_-2007insT|||||2007|,CT|downstream_gene_variant|MODIFIER|ctg-1|WBGene00010370|transcript|H06O01.3a.1|protein_coding||c.*2144_*2145insT|||||2021|,CT|downstream_g…	PRDE1	1	I	7011210	C	CT	chd-1	HIGH	frameshift_variant	OTHER	TRUE	FALSE	25	5	30	25,5	1	Insertion	0.166667
CT|frameshift_variant|HIGH|prpf-4|WBGene00004186|transcript|F22D6.5a.1|protein_coding|2/8|c.279dupA|p.Asp94fs|305/2506|279/2328|93/775||,CT|frameshift_variant|HIGH|prpf-4|WBGene00004186|transcript|F22D6.5b.1|protein_coding|2/7|c.279dupA|p.Asp94fs|305/2273|279/2247|93/748||,CT|upstream_gene_variant|MODIFIER|nars-1|WBGene00003815|transcript|F22D6.3a.1|protein_coding||c.-4133dupA|||||4128|,CT|upstre…	PRDE1	1	I	7094189	C	CT	prpf-4	HIGH	frameshift_variant	OTHER	TRUE	FALSE	77	12	89	77,12	1	Insertion	0.134831
C|frameshift_variant|HIGH|ekl-1|WBGene00009052|transcript|F22D6.6.1|protein_coding|11/11|c.1817delA|p.Asn606fs|1819/2149|1817/1821|606/606||INFO_REALIGN_3_PRIME,C|upstream_gene_variant|MODIFIER|prpf-4|WBGene00004186|transcript|F22D6.5a.1|protein_coding||c.-3563delT|||||3537|,C|upstream_gene_variant|MODIFIER|F22D6.14|WBGene00009055|transcript|F22D6.14|pseudogene||n.-575delA|||||575|,C|upstream_gen…	PRDE1	1	I	7098073	CA	C	ekl-1	HIGH	frameshift_variant	OTHER	FALSE	FALSE	10	2	12	10,2	1	Deletion	0.166667
GA|frameshift_variant|HIGH|swsn-9|WBGene00007256|transcript|C01H6.7a.1|protein_coding|2/7|c.135dupA|p.Glu46fs|162/2162|136/1911|46/636||INFO_REALIGN_3_PRIME,GA|frameshift_variant|HIGH|swsn-9|WBGene00007256|transcript|C01H6.7a.2|protein_coding|3/8|c.135dupA|p.Glu46fs|227/2220|136/1911|46/636||INFO_REALIGN_3_PRIME,GA|frameshift_variant|HIGH|swsn-9|WBGene00007256|transcript|C01H6.7b.1|protein_coding…	PRDE1	1	I	7225269	G	GA	swsn-9	HIGH	frameshift_variant	OTHER	TRUE	FALSE	81	12	93	81,12	1	Insertion	0.129032
CT|frameshift_variant|HIGH|hasp-1|WBGene00007258|transcript|C01H6.9.1|protein_coding|7/11|c.969dupA|p.Glu324fs|970/2995|969/2850|323/949||,CT|upstream_gene_variant|MODIFIER|21ur-11100|WBGene00171678|transcript|R06C7.11|pseudogene||n.-3595_-3594insT|||||3594|,CT|upstream_gene_variant|MODIFIER|wago-1|WBGene00011061|transcript|R06C7.1.1|protein_coding||c.-3651_-3650insT|||||3613|,CT|upstream_gene_va…	PRDE1	1	I	7231757	C	CT	hasp-1	HIGH	frameshift_variant	OTHER	TRUE	FALSE	21	6	27	21,6	1	Insertion	0.222222
GT|frameshift_variant|HIGH|hasp-1|WBGene00007258|transcript|C01H6.9.1|protein_coding|4/11|c.555dupA|p.Pro186fs|556/2995|555/2850|185/949||,GT|upstream_gene_variant|MODIFIER|21ur-11100|WBGene00171678|transcript|R06C7.11|pseudogene||n.-2978_-2977insT|||||2977|,GT|upstream_gene_variant|MODIFIER|wago-1|WBGene00011061|transcript|R06C7.1.1|protein_coding||c.-3034_-3033insT|||||2996|,GT|upstream_gene_va…	PRDE1	1	I	7232374	G	GT	hasp-1	HIGH	frameshift_variant	OTHER	TRUE	FALSE	13	3	16	13,3	1	Insertion	0.1875
TA|frameshift_variant|HIGH|wago-1|WBGene00011061|transcript|R06C7.1.1|protein_coding|2/9|c.345dupA|p.Gly116fs|383/3066|346/2838|116/945||INFO_REALIGN_3_PRIME,TA|frameshift_variant|HIGH|wago-1|WBGene00011061|transcript|R06C7.1.2|protein_coding|2/9|c.345dupA|p.Gly116fs|370/3052|346/2838|116/945||INFO_REALIGN_3_PRIME,TA|upstream_gene_variant|MODIFIER|hasp-1|WBGene00007258|transcript|C01H6.9.1|protei…	PRDE1	1	I	7235792	T	TA	wago-1	HIGH	frameshift_variant	OTHER	TRUE	FALSE	88	21	109	88,21	1	Insertion	0.192661
GT|frameshift_variant|HIGH|ttx-7|WBGene00008765|transcript|F13G3.5a.1|protein_coding|4/6|c.363dupA|p.Gln122fs|369/1022|363/858|121/285||,GT|frameshift_variant|HIGH|ttx-7|WBGene00008765|transcript|F13G3.5b.1|protein_coding|4/6|c.363dupA|p.Gln122fs|369/1013|363/849|121/282||,GT|frameshift_variant|HIGH|ttx-7|WBGene00008765|transcript|F13G3.5a.2|protein_coding|4/6|c.363dupA|p.Gln122fs|363/992|363/858…	PRDE1	1	I	7302183	G	GT	ttx-7	HIGH	frameshift_variant	OTHER	TRUE	FALSE	20	5	25	20,5	1	Insertion	0.2
C|missense_variant|MODERATE|ttx-7|WBGene00008765|transcript|F13G3.5a.1|protein_coding|1/6|c.29A>G|p.Glu10Gly|35/1022|29/858|10/285||,C|missense_variant|MODERATE|ttx-7|WBGene00008765|transcript|F13G3.5b.1|protein_coding|1/6|c.29A>G|p.Glu10Gly|35/1013|29/849|10/282||,C|missense_variant|MODERATE|ttx-7|WBGene00008765|transcript|F13G3.5a.2|protein_coding|1/6|c.29A>G|p.Glu10Gly|29/992|29/858|10/285||,C…	PRDE1	1	I	7302941	T	C	ttx-7	MODERATE	missense_variant	MISSENSE	FALSE	FALSE	11	2	13	11,2	1	SNP	0.153846
A|stop_gained|HIGH|ttx-7|WBGene00008765|transcript|F13G3.5a.1|protein_coding|1/6|c.28G>T|p.Glu10*|34/1022|28/858|10/285||,A|stop_gained|HIGH|ttx-7|WBGene00008765|transcript|F13G3.5b.1|protein_coding|1/6|c.28G>T|p.Glu10*|34/1013|28/849|10/282||,A|stop_gained|HIGH|ttx-7|WBGene00008765|transcript|F13G3.5a.2|protein_coding|1/6|c.28G>T|p.Glu10*|28/992|28/858|10/285||,A|stop_gained|HIGH|ttx-7|WBGene000…	PRDE1	1	I	7302942	C	A	ttx-7	HIGH	stop_gained	NONSENSE	TRUE	TRUE	11	2	13	11,2	1	SNP	0.153846
A|missense_variant|MODERATE|ttx-7|WBGene00008765|transcript|F13G3.5a.1|protein_coding|1/6|c.27A>T|p.Glu9Asp|33/1022|27/858|9/285||,A|missense_variant|MODERATE|ttx-7|WBGene00008765|transcript|F13G3.5b.1|protein_coding|1/6|c.27A>T|p.Glu9Asp|33/1013|27/849|9/282||,A|missense_variant|MODERATE|ttx-7|WBGene00008765|transcript|F13G3.5a.2|protein_coding|1/6|c.27A>T|p.Glu9Asp|27/992|27/858|9/285||,A|misse…	PRDE1	1	I	7302943	T	A	ttx-7	MODERATE	missense_variant	MISSENSE	FALSE	FALSE	11	2	13	11,2	1	SNP	0.153846
A|frameshift_variant|HIGH|mif-3|WBGene00003236|transcript|F13G3.9.1|protein_coding|3/3|c.423delA|p.Gln141fs|424/556|423/441|141/146||,A|upstream_gene_variant|MODIFIER|eat-5|WBGene00001136|transcript|F13G3.8.1|protein_coding||c.-1195delA|||||990|,A|upstream_gene_variant|MODIFIER|F52A8.1|WBGene00009915|transcript|F52A8.1.1|protein_coding||c.-4719delT|||||4717|,A|upstream_gene_variant|MODIFIER|eat-5…	PRDE1	1	I	7312928	AT	A	mif-3	HIGH	frameshift_variant	OTHER	FALSE	FALSE	10	2	12	10,2	1	Deletion	0.166667
GA|frameshift_variant|HIGH|kbrl-1|WBGene00009919|transcript|F52A8.6a.1|protein_coding|4/6|c.537dupA|p.Val180fs|538/1429|538/1095|180/364||INFO_REALIGN_3_PRIME,GA|frameshift_variant|HIGH|kbrl-1|WBGene00009919|transcript|F52A8.6c.1|protein_coding|4/6|c.42dupA|p.Val15fs|484/1375|43/600|15/199||INFO_REALIGN_3_PRIME,GA|frameshift_variant|HIGH|kbrl-1|WBGene00009919|transcript|F52A8.6d.1|protein_coding|…	PRDE1	1	I	7349338	G	GA	kbrl-1	HIGH	frameshift_variant	OTHER	TRUE	FALSE	72	11	83	72,11	1	Insertion	0.13253
AT|frameshift_variant|HIGH|inx-14|WBGene00002136|transcript|F07A5.1b.1|protein_coding|6/8|c.1029dupA|p.Ser344fs|1130/1568|1029/1305|343/434||,AT|frameshift_variant|HIGH|inx-14|WBGene00002136|transcript|F07A5.1b.2|protein_coding|5/7|c.1029dupA|p.Ser344fs|1044/1474|1029/1305|343/434||,AT|frameshift_variant|HIGH|inx-14|WBGene00002136|transcript|F07A5.1a.2|protein_coding|5/7|c.1029dupA|p.Ser344fs|104…	PRDE1	1	I	7350836	A	AT	inx-14	HIGH	frameshift_variant	OTHER	TRUE	FALSE	28	4	32	28,4	1	Insertion	0.125
CA|frameshift_variant|HIGH|lars-2|WBGene00003074|transcript|ZK524.3a.1|protein_coding|5/9|c.1491dupT|p.Ala498fs|1494/2733|1491/2580|497/859||,CA|frameshift_variant|HIGH|lars-2|WBGene00003074|transcript|ZK524.3c.1|protein_coding|3/7|c.279dupT|p.Ala94fs|573/1806|279/1368|93/455||,CA|downstream_gene_variant|MODIFIER|unc-13|WBGene00006752|transcript|ZK524.2d.1|protein_coding||c.*4927_*4928insA|||||45…	PRDE1	1	I	7458656	C	CA	lars-2	HIGH	frameshift_variant	OTHER	TRUE	FALSE	9	2	11	9,2	1	Insertion	0.181818
GA|frameshift_variant|HIGH|pbrm-1|WBGene00007042|transcript|C26C6.1a.1|protein_coding|4/15|c.1506dupA|p.Pro503fs|1512/6001|1507/5652|503/1883||INFO_REALIGN_3_PRIME,GA|5_prime_UTR_variant|MODIFIER|pbrm-1|WBGene00007042|transcript|C26C6.1b.1|protein_coding|4/15|c.-2511dupA|||||4278|INFO_REALIGN_3_PRIME,GA|upstream_gene_variant|MODIFIER|T28F4.4|WBGene00012139|transcript|T28F4.4b.1|protein_coding||c.…	PRDE1	1	I	7497095	G	GA	pbrm-1	HIGH	frameshift_variant	OTHER	TRUE	FALSE	27	6	33	27,6	1	Insertion	0.181818
CT|frameshift_variant|HIGH|dcp-66|WBGene00000938|transcript|C26C6.5b.1|protein_coding|4/10|c.1432dupA|p.Arg478fs|1578/3014|1432/2175|478/724||,CT|frameshift_variant|HIGH|dcp-66|WBGene00000938|transcript|C26C6.5a.1|protein_coding|4/10|c.1432dupA|p.Arg478fs|1578/3005|1432/2166|478/721||,CT|frameshift_variant|HIGH|dcp-66|WBGene00000938|transcript|C26C6.5b.2|protein_coding|4/9|c.1432dupA|p.Arg478fs|1…	PRDE1	1	I	7539370	C	CT	dcp-66	HIGH	frameshift_variant	OTHER	TRUE	FALSE	71	13	84	71,13	1	Insertion	0.154762
GA|frameshift_variant|HIGH|chs-1|WBGene00000496|transcript|T25G3.2.1|protein_coding|6/10|c.1381dupA|p.Thr461fs|1528/4376|1382/3969|461/1322||INFO_REALIGN_3_PRIME,GA|frameshift_variant|HIGH|chs-1|WBGene00000496|transcript|T25G3.2.2|protein_coding|6/11|c.1381dupA|p.Thr461fs|1382/4053|1382/3969|461/1322||INFO_REALIGN_3_PRIME,GA|upstream_gene_variant|MODIFIER|T25G3.3|WBGene00012030|transcript|T25G3.3…	PRDE1	1	I	7556607	G	GA	chs-1	HIGH	frameshift_variant	OTHER	TRUE	FALSE	150	38	188	150,38	1	Insertion	0.202128
CT|frameshift_variant|HIGH|mans-1|WBGene00008411|transcript|D2030.1.1|protein_coding|5/7|c.975dupA|p.Asp326fs|1050/2016|975/1623|325/540||,CT|frameshift_variant|HIGH|mans-1|WBGene00008411|transcript|D2030.1.2|protein_coding|6/8|c.975dupA|p.Asp326fs|1141/2058|975/1623|325/540||,CT|upstream_gene_variant|MODIFIER|D2030.14|WBGene00198391|transcript|D2030.14|lincRNA||n.-2046dupA|||||2046|,CT|downstrea…	PRDE1	1	I	7569139	C	CT	mans-1	HIGH	frameshift_variant	OTHER	TRUE	FALSE	49	9	58	49,9	1	Insertion	0.155172
CT|frameshift_variant|HIGH|capg-1|WBGene00009254|transcript|F29D11.2.1|protein_coding|9/14|c.1833dupA|p.Val612fs|1850/3823|1833/3462|611/1153||,CT|downstream_gene_variant|MODIFIER|lrp-1|WBGene00003071|transcript|F29D11.1.1|protein_coding||c.*3440_*3441insT|||||3095|,CT|downstream_gene_variant|MODIFIER|21ur-12960|WBGene00168760|transcript|F26A3.10|pseudogene||n.*2152dupA|||||2152|,CT|downstream_ge…	PRDE1	1	I	7637229	C	CT	capg-1	HIGH	frameshift_variant	OTHER	TRUE	FALSE	68	9	77	68,9	1	Insertion	0.116883
AT|frameshift_variant|HIGH|capg-1|WBGene00009254|transcript|F29D11.2.1|protein_coding|6/14|c.1021dupA|p.Ile341fs|1038/3823|1021/3462|341/1153||,AT|downstream_gene_variant|MODIFIER|lrp-1|WBGene00003071|transcript|F29D11.1.1|protein_coding||c.*4406_*4407insT|||||4061|,AT|downstream_gene_variant|MODIFIER|21ur-12960|WBGene00168760|transcript|F26A3.10|pseudogene||n.*1186dupA|||||1186|,AT|downstream_ge…	PRDE1	1	I	7638195	A	AT	capg-1	HIGH	frameshift_variant	OTHER	TRUE	FALSE	35	5	40	35,5	1	Insertion	0.125
GT|frameshift_variant|HIGH|rrf-1|WBGene00004508|transcript|F26A3.8a.1|protein_coding|12/20|c.2634dupA|p.Leu879fs|2644/5025|2634/4806|878/1601||,GT|frameshift_variant|HIGH|rrf-1|WBGene00004508|transcript|F26A3.8b.1|protein_coding|11/19|c.2391dupA|p.Leu798fs|2391/4771|2391/4563|797/1520||,GT|upstream_gene_variant|MODIFIER|F26A3.1|WBGene00009140|transcript|F26A3.1.1|protein_coding||c.-4695dupA|||||4…	PRDE1	1	I	7646461	G	GT	rrf-1	HIGH	frameshift_variant	OTHER	TRUE	FALSE	13	4	17	13,4	1	Insertion	0.235294
G|synonymous_variant|LOW|rrf-1|WBGene00004508|transcript|F26A3.8a.1|protein_coding|10/20|c.2298T>C|p.Ile766Ile|2308/5025|2298/4806|766/1601||,G|synonymous_variant|LOW|rrf-1|WBGene00004508|transcript|F26A3.8b.1|protein_coding|9/19|c.2055T>C|p.Ile685Ile|2055/4771|2055/4563|685/1520||,G|upstream_gene_variant|MODIFIER|ncbp-2|WBGene00009141|transcript|F26A3.2a.1|protein_coding||c.-3654T>C|||||3567|,G|…	PRDE1	1	I	7646895	A	G	rrf-1	LOW	synonymous_variant	SILENT	FALSE	FALSE	13	3	16	13,3	1	SNP	0.1875
A|missense_variant|MODERATE|rrf-1|WBGene00004508|transcript|F26A3.8a.1|protein_coding|1/20|c.98C>T|p.Thr33Ile|108/5025|98/4806|33/1601||,A|upstream_gene_variant|MODIFIER|rrf-1|WBGene00004508|transcript|F26A3.8b.1|protein_coding||c.-240C>T|||||240|,A|downstream_gene_variant|MODIFIER|ego-1|WBGene00001214|transcript|F26A3.3.1|protein_coding||c.*997C>T|||||748|	PRDE1	1	I	7649670	G	A	rrf-1	MODERATE	missense_variant	MISSENSE	FALSE	FALSE	11	2	13	11,2	1	SNP	0.153846
C|missense_variant|MODERATE|rrf-1|WBGene00004508|transcript|F26A3.8a.1|protein_coding|1/20|c.97A>G|p.Thr33Ala|107/5025|97/4806|33/1601||,C|upstream_gene_variant|MODIFIER|rrf-1|WBGene00004508|transcript|F26A3.8b.1|protein_coding||c.-241A>G|||||241|,C|downstream_gene_variant|MODIFIER|ego-1|WBGene00001214|transcript|F26A3.3.1|protein_coding||c.*996A>G|||||747|	PRDE1	1	I	7649671	T	C	rrf-1	MODERATE	missense_variant	MISSENSE	FALSE	FALSE	11	2	13	11,2	1	SNP	0.153846
GT|frameshift_variant|HIGH|ego-1|WBGene00001214|transcript|F26A3.3.1|protein_coding|10/15|c.3482dupA|p.Asn1161fs|3546/5212|3482/4899|1161/1632||,GT|upstream_gene_variant|MODIFIER|rrf-1|WBGene00004508|transcript|F26A3.8a.1|protein_coding||c.-2558dupA|||||2548|,GT|upstream_gene_variant|MODIFIER|rrf-1|WBGene00004508|transcript|F26A3.8b.1|protein_coding||c.-2895dupA|||||2895|,GT|downstream_gene_varia…	PRDE1	1	I	7652324	G	GT	ego-1	HIGH	frameshift_variant	OTHER	TRUE	FALSE	26	8	34	26,8	1	Insertion	0.235294
CT|frameshift_variant|HIGH|F26A3.7|WBGene00009145|transcript|F26A3.7.1|protein_coding|5/6|c.719dupA|p.Arg241fs|726/951|719/894|240/297||,CT|upstream_gene_variant|MODIFIER|del-3|WBGene00009144|transcript|F26A3.6.1|protein_coding||c.-2488dupA|||||2487|,CT|upstream_gene_variant|MODIFIER|T24B1.1|WBGene00011975|transcript|T24B1.1.1|protein_coding||c.-1482_-1481insT|||||1467|,CT|upstream_gene_variant|M…	PRDE1	1	I	7675200	C	CT	F26A3.7	HIGH	frameshift_variant	OTHER	TRUE	FALSE	19	5	24	19,5	1	Insertion	0.208333
CA|frameshift_variant|HIGH|T23G11.4|WBGene00011969|transcript|T23G11.4.1|protein_coding|1/2|c.43dupA|p.Arg15fs|61/805|44/723|15/240||INFO_REALIGN_3_PRIME,CA|upstream_gene_variant|MODIFIER|lron-9|WBGene00011971|transcript|T23G11.6a.1|protein_coding||c.-5033dupT|||||4976|,CA|upstream_gene_variant|MODIFIER|gld-1|WBGene00001595|transcript|T23G11.3.1|protein_coding||c.-1318_-1317insA|||||1282|,CA|upst…	PRDE1	1	I	7694378	C	CA	T23G11.4	HIGH	frameshift_variant	OTHER	TRUE	FALSE	9	2	11	9,2	1	Insertion	0.181818
C|synonymous_variant|LOW|gna-2|WBGene00001647|transcript|T23G11.2.1|protein_coding|3/4|c.501T>C|p.Ala167Ala|644/1271|501/1044|167/347||,C|upstream_gene_variant|MODIFIER|T23G11.11|WBGene00077728|transcript|T23G11.11.1|protein_coding||c.-898T>C|||||838|,C|upstream_gene_variant|MODIFIER|T23G11.12|WBGene00220089|transcript|T23G11.12|snoRNA||n.-894T>C|||||894|,C|upstream_gene_variant|MODIFIER|F27D4.1|…	PRDE1	1	I	7700283	T	C	gna-2	LOW	synonymous_variant	SILENT	FALSE	FALSE	17	4	21	17,4	1	SNP	0.190476
TA|frameshift_variant|HIGH|F27D4.1|WBGene00009187|transcript|F27D4.1.1|protein_coding|4/7|c.471dupA|p.Val158fs|477/1134|472/999|158/332||INFO_REALIGN_3_PRIME,TA|upstream_gene_variant|MODIFIER|T23G11.1|WBGene00011968|transcript|T23G11.1.1|protein_coding||c.-1311dupT|||||1227|,TA|downstream_gene_variant|MODIFIER|T23G11.10|WBGene00011973|transcript|T23G11.10.1|protein_coding||c.*4242_*4243insA|||||4…	PRDE1	1	I	7703279	T	TA	F27D4.1	HIGH	frameshift_variant	OTHER	TRUE	FALSE	49	10	59	49,10	1	Insertion	0.169492
CA|frameshift_variant|HIGH|drh-3|WBGene00008400|transcript|D2005.5.1|protein_coding|5/15|c.843dupA|p.Glu282fs|856/3565|844/3360|282/1119||INFO_REALIGN_3_PRIME,CA|downstream_gene_variant|MODIFIER|D2005.4|WBGene00008399|transcript|D2005.4.1|protein_coding||c.*2878_*2879insA|||||2674|,CA|downstream_gene_variant|MODIFIER|D2005.7|WBGene00086551|transcript|D2005.7.1|protein_coding||c.*1846_*1847insA|||…	PRDE1	1	I	7822083	C	CA	drh-3	HIGH	frameshift_variant	OTHER	TRUE	FALSE	39	6	45	39,6	1	Insertion	0.133333
CA|frameshift_variant|HIGH|drh-3|WBGene00008400|transcript|D2005.5.1|protein_coding|11/15|c.2901dupA|p.Val968fs|2914/3565|2902/3360|968/1119||INFO_REALIGN_3_PRIME,CA|downstream_gene_variant|MODIFIER|D2005.7|WBGene00086551|transcript|D2005.7.1|protein_coding||c.*4894_*4895insA|||||4643|,CA|downstream_gene_variant|MODIFIER|glna-3|WBGene00009271|transcript|F30F8.2.1|protein_coding||c.*1359dupT|||||1…	PRDE1	1	I	7825131	C	CA	drh-3	HIGH	frameshift_variant	OTHER	TRUE	FALSE	45	9	54	45,9	1	Insertion	0.166667
C|frameshift_variant|HIGH|taf-5|WBGene00006386|transcript|F30F8.8.1|protein_coding|6/7|c.1810_1811delAA|p.Asn604fs|1822/2092|1810/1947|604/648||INFO_REALIGN_3_PRIME,C|frameshift_variant|HIGH|taf-5|WBGene00006386|transcript|F30F8.8.2|protein_coding|7/8|c.1810_1811delAA|p.Asn604fs|1978/2248|1810/1947|604/648||INFO_REALIGN_3_PRIME,C|frameshift_variant|HIGH|taf-5|WBGene00006386|transcript|F30F8.8.3|p…	PRDE1	1	I	7852988	CAA	C	taf-5	HIGH	frameshift_variant	OTHER	TRUE	FALSE	16	2	18	16,2	1	Deletion	0.111111
CT|frameshift_variant|HIGH|nud-2|WBGene00011230|transcript|R11A5.2.1|protein_coding|1/4|c.162dupA|p.Ala55fs|176/1195|162/882|54/293||,CT|downstream_gene_variant|MODIFIER|apb-3|WBGene00000163|transcript|R11A5.1a.1|protein_coding||c.*1495_*1496insT|||||1392|,CT|downstream_gene_variant|MODIFIER|R11A5.8|WBGene00220041|transcript|R11A5.8|snoRNA||n.*698dupA|||||698|,CT|downstream_gene_variant|MODIFIER|…	PRDE1	1	I	7859241	C	CT	nud-2	HIGH	frameshift_variant	OTHER	TRUE	FALSE	134	32	166	134,32	1	Insertion	0.192771
CT|frameshift_variant|HIGH|nmy-2|WBGene00003777|transcript|F20G4.3.1|protein_coding|2/15|c.98dupA|p.Leu34fs|132/6494|98/6012|33/2003||,CT|upstream_gene_variant|MODIFIER|T22C1.1|WBGene00011912|transcript|T22C1.1.1|protein_coding||c.-1872_-1871insT|||||1869|,CT|upstream_gene_variant|MODIFIER|T22C1.3|WBGene00011914|transcript|T22C1.3.1|protein_coding||c.-4178_-4177insT|||||4165|,CT|upstream_gene_var…	PRDE1	1	I	7934394	C	CT	nmy-2	HIGH	frameshift_variant	OTHER	FALSE	FALSE	68	10	78	68,10	1	Insertion	0.128205
GA|frameshift_variant|HIGH|T22C1.1|WBGene00011912|transcript|T22C1.1.1|protein_coding|4/5|c.837dupA|p.Val280fs|840/1750|838/1071|280/356||INFO_REALIGN_3_PRIME,GA|frameshift_variant|HIGH|T22C1.1|WBGene00011912|transcript|T22C1.1.2|protein_coding|4/5|c.837dupA|p.Val280fs|881/1791|838/1071|280/356||INFO_REALIGN_3_PRIME,GA|frameshift_variant|HIGH|T22C1.1|WBGene00011912|transcript|T22C1.1.3|protein_co…	PRDE1	1	I	7937365	G	GA	T22C1.1	HIGH	frameshift_variant	OTHER	TRUE	FALSE	122	30	152	122,30	1	Insertion	0.197368
GA|frameshift_variant|HIGH|T22C1.5|WBGene00011916|transcript|T22C1.5.1|protein_coding|3/4|c.347dupA|p.Leu117fs|374/923|348/600|116/199||INFO_REALIGN_3_PRIME,GA|upstream_gene_variant|MODIFIER|glb-26|WBGene00011913|transcript|T22C1.2.1|protein_coding||c.-2876dupT|||||2872|,GA|upstream_gene_variant|MODIFIER|ctf-8|WBGene00011915|transcript|T22C1.4.1|protein_coding||c.-661dupT|||||568|,GA|upstream_gen…	PRDE1	1	I	7941357	G	GA	T22C1.5	HIGH	frameshift_variant	OTHER	TRUE	FALSE	34	15	49	34,15	1	Insertion	0.306122
GT|frameshift_variant|HIGH|jph-1|WBGene00002179|transcript|T22C1.7.1|protein_coding|4/10|c.687dupA|p.Gln230fs|736/3051|687/2244|229/747||,GT|upstream_gene_variant|MODIFIER|T22C1.15|WBGene00200953|transcript|T22C1.15|lincRNA||n.-1918_-1917insT|||||1917|,GT|upstream_gene_variant|MODIFIER|linc-58|WBGene00219608|transcript|T22C1.16|lincRNA||n.-3148_-3147insT|||||3147|,GT|downstream_gene_variant|MODIF…	PRDE1	1	I	7949737	G	GT	jph-1	HIGH	frameshift_variant	OTHER	TRUE	FALSE	12	4	16	12,4	1	Insertion	0.25
C|frameshift_variant|HIGH|T22C1.8|WBGene00011918|transcript|T22C1.8.1|protein_coding|7/8|c.1446delA|p.Glu483fs|1601/2011|1446/1776|482/591||,C|frameshift_variant|HIGH|T22C1.8|WBGene00011918|transcript|T22C1.8.2|protein_coding|8/9|c.1446delA|p.Glu483fs|1584/1993|1446/1776|482/591||,C|upstream_gene_variant|MODIFIER|jph-1|WBGene00002179|transcript|T22C1.7.1|protein_coding||c.-4887delA|||||4838|,C|up…	PRDE1	1	I	7956430	CT	C	T22C1.8	HIGH	frameshift_variant	OTHER	TRUE	FALSE	8	2	10	8,2	1	Deletion	0.2
GA|frameshift_variant|HIGH|rbg-2|WBGene00004318|transcript|T22C1.10a.1|protein_coding|2/12|c.119dupA|p.Asn40fs|133/4089|120/3924|40/1307||INFO_REALIGN_3_PRIME,GA|frameshift_variant|HIGH|rbg-2|WBGene00004318|transcript|T22C1.10b.1|protein_coding|2/12|c.71dupA|p.Asn24fs|131/4085|72/3876|24/1291||INFO_REALIGN_3_PRIME,GA|upstream_gene_variant|MODIFIER|T22C1.8|WBGene00011918|transcript|T22C1.8.1|prote…	PRDE1	1	I	7962228	G	GA	rbg-2	HIGH	frameshift_variant	OTHER	FALSE	FALSE	34	6	40	34,6	1	Insertion	0.15
CT|frameshift_variant|HIGH|T22C1.11|WBGene00011920|transcript|T22C1.11.1|protein_coding|2/5|c.471dupA|p.Asp158fs|479/1465|471/1335|157/444||,CT|downstream_gene_variant|MODIFIER|T22C1.17|WBGene00220081|transcript|T22C1.17|lincRNA||n.*699dupA|||||699|,CT|downstream_gene_variant|MODIFIER|H05L14.1|WBGene00010366|transcript|H05L14.1.1|protein_coding||c.*4485dupA|||||4420|,CT|downstream_gene_variant|MO…	PRDE1	1	I	7968053	C	CT	T22C1.11	HIGH	frameshift_variant	OTHER	TRUE	FALSE	16	5	21	16,5	1	Insertion	0.238095
GT|frameshift_variant|HIGH|T22C1.11|WBGene00011920|transcript|T22C1.11.1|protein_coding|2/5|c.403dupA|p.Thr135fs|411/1465|403/1335|135/444||,GT|downstream_gene_variant|MODIFIER|T22C1.17|WBGene00220081|transcript|T22C1.17|lincRNA||n.*631dupA|||||631|,GT|downstream_gene_variant|MODIFIER|H05L14.1|WBGene00010366|transcript|H05L14.1.1|protein_coding||c.*4417dupA|||||4352|,GT|downstream_gene_variant|MO…	PRDE1	1	I	7968121	G	GT	T22C1.11	HIGH	frameshift_variant	OTHER	TRUE	FALSE	8	3	11	8,3	1	Insertion	0.272727
CA|frameshift_variant|HIGH|rskn-2|WBGene00008311|transcript|C54G4.1c.1|protein_coding|2/12|c.184dupA|p.Thr62fs|241/2879|185/2322|62/773||INFO_REALIGN_3_PRIME,CA|frameshift_variant|HIGH|rskn-2|WBGene00008311|transcript|C54G4.1a.1|protein_coding|2/12|c.184dupA|p.Thr62fs|241/2876|185/2319|62/772||INFO_REALIGN_3_PRIME,CA|frameshift_variant|HIGH|rskn-2|WBGene00008311|transcript|C54G4.1d.1|protein_codi…	PRDE1	1	I	8014915	C	CA	rskn-2	HIGH	frameshift_variant	OTHER	TRUE	FALSE	16	4	20	16,4	1	Insertion	0.2
GA|frameshift_variant|HIGH|apr-1|WBGene00000156|transcript|K04G2.8b.1|protein_coding|3/7|c.357dupA|p.Ala120fs|358/3915|358/3567|120/1188||INFO_REALIGN_3_PRIME,GA|frameshift_variant|HIGH|apr-1|WBGene00000156|transcript|K04G2.8c.1|protein_coding|3/6|c.357dupA|p.Ala120fs|358/2679|358/2679|120/892||INFO_REALIGN_3_PRIME,GA|frameshift_variant|HIGH|apr-1|WBGene00000156|transcript|K04G2.8a.1|protein_codi…	PRDE1	1	I	8050646	G	GA	apr-1	HIGH	frameshift_variant	OTHER	TRUE	FALSE	7	5	12	7,5	1	Insertion	0.416667
CA|frameshift_variant|HIGH|rme-8|WBGene00004378|transcript|F18C12.2a.1|protein_coding|18/23|c.5172dupA|p.Val1725fs|5220/7344|5173/6840|1725/2279||INFO_REALIGN_3_PRIME,CA|frameshift_variant|HIGH|rme-8|WBGene00004378|transcript|F18C12.2b.1|protein_coding|18/22|c.5172dupA|p.Val1725fs|5220/7320|5173/6816|1725/2271||INFO_REALIGN_3_PRIME,CA|upstream_gene_variant|MODIFIER|F18C12.3|WBGene00008934|transcr…	PRDE1	1	I	8092076	C	CA	rme-8	HIGH	frameshift_variant	OTHER	TRUE	FALSE	13	3	16	13,3	1	Insertion	0.1875
GA|frameshift_variant|HIGH|F18C12.3|WBGene00008934|transcript|F18C12.3.1|protein_coding|1/7|c.432dupA|p.Ser145fs|433/1716|433/1638|145/545||INFO_REALIGN_3_PRIME,GA|downstream_gene_variant|MODIFIER|rme-8|WBGene00004378|transcript|F18C12.2a.1|protein_coding||c.*1048_*1049insA|||||592|,GA|downstream_gene_variant|MODIFIER|rme-8|WBGene00004378|transcript|F18C12.2b.1|protein_coding||c.*1048_*1049insA||…	PRDE1	1	I	8096165	G	GA	F18C12.3	HIGH	frameshift_variant	OTHER	TRUE	FALSE	31	5	36	31,5	1	Insertion	0.138889
TA|frameshift_variant|HIGH|F18C12.3|WBGene00008934|transcript|F18C12.3.1|protein_coding|5/7|c.1173dupA|p.Val392fs|1174/1716|1174/1638|392/545||INFO_REALIGN_3_PRIME,TA|downstream_gene_variant|MODIFIER|rme-8|WBGene00004378|transcript|F18C12.2a.1|protein_coding||c.*2604_*2605insA|||||2148|,TA|downstream_gene_variant|MODIFIER|rme-8|WBGene00004378|transcript|F18C12.2b.1|protein_coding||c.*2604_*2605in…	PRDE1	1	I	8097721	T	TA	F18C12.3	HIGH	frameshift_variant	OTHER	TRUE	FALSE	27	3	30	27,3	1	Insertion	0.1
CT|frameshift_variant|HIGH|spr-4|WBGene00005009|transcript|C09H6.1a.1|protein_coding|5/7|c.3035dupT|p.Leu1012fs|3041/4220|3036/3936|1012/1311||INFO_REALIGN_3_PRIME,CT|frameshift_variant|HIGH|spr-4|WBGene00005009|transcript|C09H6.1b.1|protein_coding|5/7|c.3035dupT|p.Leu1012fs|3041/4220|3036/3930|1012/1309||INFO_REALIGN_3_PRIME,CT|downstream_gene_variant|MODIFIER|lin-10|WBGene00002999|transcript|C0…	PRDE1	1	I	8107472	C	CT	spr-4	HIGH	frameshift_variant	OTHER	TRUE	FALSE	29	5	34	29,5	1	Insertion	0.147059
GA|frameshift_variant|HIGH|gla-3|WBGene00011376|transcript|T02E1.3b.1|protein_coding|8/10|c.1485dupA|p.Gln496fs|1486/2460|1486/2040|496/679||INFO_REALIGN_3_PRIME,GA|frameshift_variant|HIGH|gla-3|WBGene00011376|transcript|T02E1.3a.1|protein_coding|8/10|c.1386dupA|p.Gln463fs|1415/2394|1387/1941|463/646||INFO_REALIGN_3_PRIME,GA|frameshift_variant|HIGH|gla-3|WBGene00011376|transcript|T02E1.3c.1|prote…	PRDE1	1	I	8216885	G	GA	gla-3	HIGH	frameshift_variant	OTHER	TRUE	FALSE	13	4	17	13,4	1	Insertion	0.235294
CA|frameshift_variant|HIGH|T01G9.2|WBGene00011344|transcript|T01G9.2a.1|protein_coding|4/12|c.390dupT|p.Gly131fs|406/1521|390/1269|130/422||,CA|frameshift_variant|HIGH|T01G9.2|WBGene00011344|transcript|T01G9.2b.1|protein_coding|4/12|c.381dupT|p.Gly128fs|397/1548|381/1260|127/419||,CA|downstream_gene_variant|MODIFIER|dma-1|WBGene00011345|transcript|T01G9.3.1|protein_coding||c.*3095_*3096insA|||||2…	PRDE1	1	I	8287393	C	CA	T01G9.2	HIGH	frameshift_variant	OTHER	TRUE	FALSE	14	3	17	14,3	1	Insertion	0.176471
CT|frameshift_variant|HIGH|mei-1|WBGene00003183|transcript|T01G9.5b.1|protein_coding|3/4|c.765dupT|p.Thr256fs|767/1645|766/1428|256/475||INFO_REALIGN_3_PRIME,CT|frameshift_variant|HIGH|mei-1|WBGene00003183|transcript|T01G9.5a.1|protein_coding|3/4|c.765dupT|p.Thr256fs|767/1608|766/1419|256/472||INFO_REALIGN_3_PRIME,CT|upstream_gene_variant|MODIFIER|kin-10|WBGene00002196|transcript|T01G9.6b.1|prote…	PRDE1	1	I	8295735	C	CT	mei-1	HIGH	frameshift_variant	OTHER	TRUE	FALSE	17	3	20	17,3	1	Insertion	0.15
CT|frameshift_variant|HIGH|abts-1|WBGene00009920|transcript|F52B5.1c.1|protein_coding|8/11|c.2598dupA|p.Gly867fs|2767/4180|2598/3648|866/1215||,CT|frameshift_variant|HIGH|abts-1|WBGene00009920|transcript|F52B5.1b.1|protein_coding|7/10|c.2436dupA|p.Gly813fs|2605/4032|2436/3486|812/1161||,CT|frameshift_variant|HIGH|abts-1|WBGene00009920|transcript|F52B5.1a.1|protein_coding|8/11|c.2310dupA|p.Gly771f…	PRDE1	1	I	8299030	C	CT	abts-1	HIGH	frameshift_variant	OTHER	TRUE	FALSE	11	3	14	11,3	1	Insertion	0.214286
GA|frameshift_variant|HIGH|C34B7.2|WBGene00007912|transcript|C34B7.2.1|protein_coding|2/7|c.231dupA|p.Gly78fs|248/2879|232/2718|78/905||INFO_REALIGN_3_PRIME,GA|downstream_gene_variant|MODIFIER|C34B7.1|WBGene00007911|transcript|C34B7.1.1|protein_coding||c.*4926_*4927insA|||||4846|,GA|downstream_gene_variant|MODIFIER|mys-4|WBGene00007914|transcript|C34B7.4.1|protein_coding||c.*1607_*1608insA|||||14…	PRDE1	1	I	8337628	G	GA	C34B7.2	HIGH	frameshift_variant	OTHER	TRUE	FALSE	20	4	24	20,4	1	Insertion	0.166667
CT|frameshift_variant|HIGH|tbcd-1|WBGene00008887|transcript|F16D3.4.1|protein_coding|6/12|c.1968dupA|p.Val657fs|1968/3969|1968/3699|656/1232||,CT|upstream_gene_variant|MODIFIER|rsd-6|WBGene00004684|transcript|F16D3.2.1|protein_coding||c.-3120dupA|||||3103|,CT|upstream_gene_variant|MODIFIER|rsd-6|WBGene00004684|transcript|F16D3.2.2|protein_coding||c.-3120dupA|||||3106|	PRDE1	1	I	8366960	C	CT	tbcd-1	HIGH	frameshift_variant	OTHER	TRUE	FALSE	27	4	31	27,4	1	Insertion	0.129032
GA|frameshift_variant|HIGH|ngp-1|WBGene00003596|transcript|T19A6.2a.1|protein_coding|8/10|c.1047dupA|p.Val350fs|1069/2152|1048/1956|350/651||INFO_REALIGN_3_PRIME,GA|frameshift_variant|HIGH|ngp-1|WBGene00003596|transcript|T19A6.2c.1|protein_coding|8/11|c.1047dupA|p.Val350fs|1069/2020|1048/1833|350/610||INFO_REALIGN_3_PRIME,GA|frameshift_variant|HIGH|ngp-1|WBGene00003596|transcript|T19A6.2b.1|prote…	PRDE1	1	I	8397132	G	GA	ngp-1	HIGH	frameshift_variant	OTHER	TRUE	FALSE	22	5	27	22,5	1	Insertion	0.185185
CA|frameshift_variant|HIGH|sin-3|WBGene00004117|transcript|F02E9.4b.1|protein_coding|5/20|c.1482dupA|p.Ser495fs|1484/4699|1483/4524|495/1507||INFO_REALIGN_3_PRIME,CA|frameshift_variant|HIGH|sin-3|WBGene00004117|transcript|F02E9.4a.1|protein_coding|5/20|c.1482dupA|p.Ser495fs|1484/4696|1483/4518|495/1505||INFO_REALIGN_3_PRIME,CA|downstream_gene_variant|MODIFIER|F02E9.7|WBGene00008531|transcript|F02…	PRDE1	1	I	8419475	C	CA	sin-3	HIGH	frameshift_variant	OTHER	TRUE	FALSE	31	6	37	31,6	1	Insertion	0.162162
TA|frameshift_variant|HIGH|sin-3|WBGene00004117|transcript|F02E9.4b.1|protein_coding|5/20|c.1563dupA|p.Asp522fs|1565/4699|1564/4524|522/1507||INFO_REALIGN_3_PRIME,TA|frameshift_variant|HIGH|sin-3|WBGene00004117|transcript|F02E9.4a.1|protein_coding|5/20|c.1563dupA|p.Asp522fs|1565/4696|1564/4518|522/1505||INFO_REALIGN_3_PRIME,TA|downstream_gene_variant|MODIFIER|F02E9.7|WBGene00008531|transcript|F02…	PRDE1	1	I	8419556	T	TA	sin-3	HIGH	frameshift_variant	OTHER	TRUE	FALSE	50	9	59	50,9	1	Insertion	0.152542
AT|frameshift_variant|HIGH|F10D11.2|WBGene00008648|transcript|F10D11.2.1|protein_coding|4/13|c.448dupA|p.Ile150fs|500/1547|448/1383|150/460||,AT|upstream_gene_variant|MODIFIER|dpt-1|WBGene00008532|transcript|F02E9.9b.1|protein_coding||c.-2046dupA|||||2033|,AT|upstream_gene_variant|MODIFIER|dpt-1|WBGene00008532|transcript|F02E9.9a.1|protein_coding||c.-4966dupA|||||4917|,AT|downstream_gene_variant|…	PRDE1	1	I	8437896	A	AT	F10D11.2	HIGH	frameshift_variant	OTHER	TRUE	FALSE	15	3	18	15,3	1	Insertion	0.166667
CA|frameshift_variant|HIGH|D1081.7|WBGene00008385|transcript|D1081.7.1|protein_coding|5/10|c.847dupA|p.Ser283fs|873/2883|848/2568|283/855||INFO_REALIGN_3_PRIME,CA|upstream_gene_variant|MODIFIER|D1081.6|WBGene00008384|transcript|D1081.6b.1|protein_coding||c.-2995dupT|||||2995|,CA|upstream_gene_variant|MODIFIER|zhp-2|WBGene00008387|transcript|D1081.9.1|protein_coding||c.-1646dupT|||||1646|,CA|upstr…	PRDE1	1	I	8488688	C	CA	D1081.7	HIGH	frameshift_variant	OTHER	TRUE	FALSE	92	19	111	92,19	1	Insertion	0.171171
GA|frameshift_variant|HIGH|cdc-5L|WBGene00008386|transcript|D1081.8.1|protein_coding|4/8|c.500dupA|p.Ala168fs|516/2514|501/2268|167/755||INFO_REALIGN_3_PRIME,GA|upstream_gene_variant|MODIFIER|zhp-2|WBGene00008387|transcript|D1081.9.1|protein_coding||c.-4893dupT|||||4893|,GA|downstream_gene_variant|MODIFIER|D1081.7|WBGene00008385|transcript|D1081.7.1|protein_coding||c.*1287_*1288insA|||||998|	PRDE1	1	I	8491935	G	GA	cdc-5L	HIGH	frameshift_variant	OTHER	TRUE	FALSE	107	15	122	107,15	1	Insertion	0.122951
CA|frameshift_variant|HIGH|zhp-3|WBGene00006976|transcript|K02B12.8b.1|protein_coding|1/8|c.82dupT|p.Cys28fs|100/1216|82/1170|28/389||,CA|frameshift_variant|HIGH|zhp-3|WBGene00006976|transcript|K02B12.8a.1|protein_coding|1/8|c.82dupT|p.Cys28fs|98/1277|82/1164|28/387||,CA|upstream_gene_variant|MODIFIER|K02B12.5|WBGene00010498|transcript|K02B12.5.1|protein_coding||c.-4618dupT|||||4618|,CA|upstream_…	PRDE1	1	I	8531238	C	CA	zhp-3	HIGH	frameshift_variant	OTHER	TRUE	FALSE	7	4	11	7,4	1	Insertion	0.363636
CA|frameshift_variant|HIGH|rskn-1|WBGene00011352|transcript|T01H8.1e.1|protein_coding|8/13|c.1071dupT|p.Ala358fs|1077/2839|1071/2415|357/804||,CA|frameshift_variant|HIGH|rskn-1|WBGene00011352|transcript|T01H8.1b.1|protein_coding|7/12|c.918dupT|p.Ala307fs|1071/2808|918/2184|306/727||,CA|frameshift_variant|HIGH|rskn-1|WBGene00011352|transcript|T01H8.1a.1|protein_coding|8/13|c.1089dupT|p.Ala364fs|10…	PRDE1	1	I	8576081	C	CA	rskn-1	HIGH	frameshift_variant	OTHER	TRUE	FALSE	28	7	35	28,7	1	Insertion	0.2
GA|frameshift_variant|HIGH|ddx-52|WBGene00011032|transcript|R05D11.4.1|protein_coding|1/8|c.145dupA|p.Met49fs|146/1888|146/1746|49/581||INFO_REALIGN_3_PRIME,GA|frameshift_variant|HIGH|ddx-52|WBGene00011032|transcript|R05D11.4.2|protein_coding|1/8|c.145dupA|p.Met49fs|146/1936|146/1746|49/581||INFO_REALIGN_3_PRIME,GA|upstream_gene_variant|MODIFIER|snrp-27|WBGene00011035|transcript|R05D11.7.1|protei…	PRDE1	1	I	8598796	G	GA	ddx-52	HIGH	frameshift_variant	OTHER	TRUE	FALSE	43	7	50	43,7	1	Insertion	0.14
CA|frameshift_variant|HIGH|snrp-27|WBGene00011035|transcript|R05D11.7.1|protein_coding|1/2|c.230dupA|p.Asp78fs|262/628|231/468|77/155||INFO_REALIGN_3_PRIME,CA|upstream_gene_variant|MODIFIER|edc-3|WBGene00011036|transcript|R05D11.8.1|protein_coding||c.-562_-561insA|||||532|,CA|upstream_gene_variant|MODIFIER|F43G9.13|WBGene00009673|transcript|F43G9.13.1|protein_coding||c.-3708_-3707insA|||||3670|,C…	PRDE1	1	I	8601592	C	CA	snrp-27	HIGH	frameshift_variant	OTHER	TRUE	FALSE	122	24	146	122,24	1	Insertion	0.164384
T|frameshift_variant|HIGH|F43G9.4|WBGene00009667|transcript|F43G9.4.1|protein_coding|9/9|c.1025delC|p.Thr342fs|1042/1085|1025/1068|342/355||,T|3_prime_UTR_variant|MODIFIER|lmd-1|WBGene00009665|transcript|F43G9.2a.1|protein_coding|5/5|c.*161delG|||||161|,T|3_prime_UTR_variant|MODIFIER|lmd-1|WBGene00009665|transcript|F43G9.2b.1|protein_coding|5/5|c.*370delG|||||488|,T|upstream_gene_variant|MODIFIER…	PRDE1	1	I	8610936	TG	T	F43G9.4	HIGH	frameshift_variant	OTHER	FALSE	FALSE	8	2	10	8,2	1	Deletion	0.2
T|missense_variant|MODERATE|F43G9.4|WBGene00009667|transcript|F43G9.4.1|protein_coding|4/9|c.256G>A|p.Ala86Thr|273/1085|256/1068|86/355||,T|upstream_gene_variant|MODIFIER|idha-1|WBGene00009664|transcript|F43G9.1.1|protein_coding||c.-3537G>A|||||3529|,T|upstream_gene_variant|MODIFIER|F43G9.16|WBGene00198826|transcript|F43G9.16|lincRNA||n.-3059G>A|||||3059|,T|upstream_gene_variant|MODIFIER|cfim-1|W…	PRDE1	1	I	8612160	C	T	F43G9.4	MODERATE	missense_variant	MISSENSE	FALSE	FALSE	18	3	21	18,3	1	SNP	0.142857
GA|frameshift_variant|HIGH|F43G9.12|WBGene00009672|transcript|F43G9.12a.1|protein_coding|2/10|c.195dupA|p.Val66fs|215/2626|196/2430|66/809||INFO_REALIGN_3_PRIME,GA|upstream_gene_variant|MODIFIER|cpn-1|WBGene00000777|transcript|F43G9.9.1|protein_coding||c.-3644dupT|||||3641|,GA|upstream_gene_variant|MODIFIER|mfap-1|WBGene00009671|transcript|F43G9.10.1|protein_coding||c.-532dupT|||||531|,GA|upstrea…	PRDE1	1	I	8640766	G	GA	F43G9.12	HIGH	frameshift_variant	OTHER	TRUE	FALSE	72	17	89	72,17	1	Insertion	0.191011
CA|frameshift_variant|HIGH|F43G9.12|WBGene00009672|transcript|F43G9.12a.1|protein_coding|2/10|c.516dupA|p.Arg173fs|536/2626|517/2430|173/809||INFO_REALIGN_3_PRIME,CA|upstream_gene_variant|MODIFIER|cpn-1|WBGene00000777|transcript|F43G9.9.1|protein_coding||c.-3964dupT|||||3961|,CA|upstream_gene_variant|MODIFIER|mfap-1|WBGene00009671|transcript|F43G9.10.1|protein_coding||c.-852dupT|||||851|,CA|upstr…	PRDE1	1	I	8641086	C	CA	F43G9.12	HIGH	frameshift_variant	OTHER	TRUE	FALSE	31	6	37	31,6	1	Insertion	0.162162
GA|frameshift_variant|HIGH|syx-17|WBGene00012150|transcript|VF39H2L.1.1|protein_coding|1/6|c.13dupA|p.Thr5fs|53/978|14/753|5/250||INFO_REALIGN_3_PRIME,GA|upstream_gene_variant|MODIFIER|mfap-1|WBGene00009671|transcript|F43G9.10.1|protein_coding||c.-4271dupT|||||4270|,GA|upstream_gene_variant|MODIFIER|sig-7|WBGene00000890|transcript|F39H2.2a.1|protein_coding||c.-1946_-1945insA|||||1945|,GA|upstream…	PRDE1	1	I	8644505	G	GA	syx-17	HIGH	frameshift_variant	OTHER	FALSE	FALSE	14	3	17	14,3	1	Insertion	0.176471
CA|frameshift_variant|HIGH|mrt-1|WBGene00045237|transcript|F39H2.5.1|protein_coding|6/8|c.1365dupA|p.Gly456fs|1372/1901|1366/1827|456/608||INFO_REALIGN_3_PRIME,CA|frameshift_variant|HIGH|mrt-1|WBGene00045237|transcript|F39H2.5.2|protein_coding|6/8|c.1365dupA|p.Gly456fs|1383/1866|1366/1827|456/608||INFO_REALIGN_3_PRIME,CA|upstream_gene_variant|MODIFIER|F39H2.3|WBGene00009563|transcript|F39H2.3.1|p…	PRDE1	1	I	8662445	C	CA	mrt-1	HIGH	frameshift_variant	OTHER	TRUE	FALSE	11	3	14	11,3	1	Insertion	0.214286
C|5_prime_UTR_premature_start_codon_gain_variant|LOW|syp-3|WBGene00006377|transcript|F39H2.4.2|protein_coding|1/5|c.-9C>G||||||,C|5_prime_UTR_variant|MODIFIER|syp-3|WBGene00006377|transcript|F39H2.4.2|protein_coding|1/5|c.-9C>G|||||9|,C|upstream_gene_variant|MODIFIER|syp-3|WBGene00006377|transcript|F39H2.4.1|protein_coding||c.-9C>G|||||3|,C|upstream_gene_variant|MODIFIER|F39H2.3|WBGene00009563|tr…	PRDE1	1	I	8664123	G	C	syp-3	LOW	5_prime_UTR_premature_start_codon_gain_variant	OTHER	FALSE	FALSE	6	4	10	6,4	1	SNP	0.4
CA|frameshift_variant|HIGH|egg-6|WBGene00010621|transcript|K07A12.2.1|protein_coding|8/9|c.2625dupT|p.Val876fs|2713/3383|2625/2886|875/961||,CA|upstream_gene_variant|MODIFIER|K07A12.8|WBGene00086557|transcript|K07A12.8a.1|protein_coding||c.-3865dupT|||||3865|,CA|upstream_gene_variant|MODIFIER|K07A12.8|WBGene00086557|transcript|K07A12.8c.1|protein_coding||c.-3865dupT|||||3795|,CA|downstream_gene_v…	PRDE1	1	I	8677412	C	CA	egg-6	HIGH	frameshift_variant	OTHER	TRUE	FALSE	46	7	53	46,7	1	Insertion	0.132075
TA|frameshift_variant|HIGH|C36B1.14|WBGene00044614|transcript|C36B1.14.1|protein_coding|1/3|c.69dupA|p.Val24fs|73/462|70/300|24/99||INFO_REALIGN_3_PRIME,TA|upstream_gene_variant|MODIFIER|pas-4|WBGene00003925|transcript|C36B1.4.1|protein_coding||c.-1735dupT|||||1735|,TA|upstream_gene_variant|MODIFIER|C36B1.16|WBGene00198377|transcript|C36B1.16|lincRNA||n.-1514dupT|||||1514|,TA|upstream_gene_varian…	PRDE1	1	I	8730221	T	TA	C36B1.14	HIGH	frameshift_variant	OTHER	TRUE	FALSE	12	4	16	12,4	1	Insertion	0.25
CA|frameshift_variant|HIGH|gls-1|WBGene00007975|transcript|C36B1.8b.1|protein_coding|6/18|c.890dupA|p.Lys298fs|891/3760|891/3159|297/1052||INFO_REALIGN_3_PRIME,CA|frameshift_variant|HIGH|gls-1|WBGene00007975|transcript|C36B1.8a.1|protein_coding|6/18|c.890dupA|p.Lys298fs|891/3691|891/3150|297/1049||INFO_REALIGN_3_PRIME,CA|frameshift_variant|HIGH|gls-1|WBGene00007975|transcript|C36B1.8c.2|protein_c…	PRDE1	1	I	8738903	C	CA	gls-1	HIGH	frameshift_variant	OTHER	TRUE	FALSE	86	13	99	86,13	1	Insertion	0.131313
TA|frameshift_variant|HIGH|trt-1|WBGene00006618|transcript|DY3.4a.1|protein_coding|6/10|c.939dupA|p.Val314fs|940/1753|940/1686|314/561||INFO_REALIGN_3_PRIME,TA|frameshift_variant|HIGH|trt-1|WBGene00006618|transcript|DY3.4a.2|protein_coding|7/11|c.939dupA|p.Val314fs|1049/1799|940/1686|314/561||INFO_REALIGN_3_PRIME,TA|frameshift_variant|HIGH|trt-1|WBGene00006618|transcript|DY3.4b.1|protein_coding|6…	PRDE1	1	I	8769925	T	TA	trt-1	HIGH	frameshift_variant	OTHER	TRUE	FALSE	27	4	31	27,4	1	Insertion	0.129032
A|missense_variant|MODERATE|phip-1|WBGene00009455|transcript|F36A2.8.1|protein_coding|2/3|c.155C>A|p.Thr52Lys|171/438|155/351|52/116||,A|missense_variant|MODERATE|phip-1|WBGene00009455|transcript|F36A2.8.2|protein_coding|3/4|c.155C>A|p.Thr52Lys|208/427|155/351|52/116||,A|upstream_gene_variant|MODIFIER|cids-2|WBGene00009451|transcript|F36A2.1d.1|protein_coding||c.-4991G>T|||||4885|,A|upstream_gene…	PRDE1	1	I	8812966	C	A	phip-1	MODERATE	missense_variant	MISSENSE	FALSE	FALSE	17	2	19	17,2	1	SNP	0.105263
T|synonymous_variant|LOW|phip-1|WBGene00009455|transcript|F36A2.8.1|protein_coding|2/3|c.156G>T|p.Thr52Thr|172/438|156/351|52/116||,T|synonymous_variant|LOW|phip-1|WBGene00009455|transcript|F36A2.8.2|protein_coding|3/4|c.156G>T|p.Thr52Thr|209/427|156/351|52/116||,T|upstream_gene_variant|MODIFIER|cids-2|WBGene00009451|transcript|F36A2.1d.1|protein_coding||c.-4992C>A|||||4886|,T|upstream_gene_varia…	PRDE1	1	I	8812967	G	T	phip-1	LOW	synonymous_variant	SILENT	FALSE	FALSE	17	2	19	17,2	1	SNP	0.105263
T|missense_variant|MODERATE|F36A2.9|WBGene00009456|transcript|F36A2.9b.1|protein_coding|4/11|c.765A>T|p.Glu255Asp|768/2081|765/1698|255/565||,T|missense_variant|MODERATE|F36A2.9|WBGene00009456|transcript|F36A2.9a.1|protein_coding|4/10|c.765A>T|p.Glu255Asp|768/1969|765/1587|255/528||,T|upstream_gene_variant|MODIFIER|rps-15|WBGene00004484|transcript|F36A2.6.1|protein_coding||c.-2029T>A|||||2021|,T|…	PRDE1	1	I	8818214	A	T	F36A2.9	MODERATE	missense_variant	MISSENSE	FALSE	FALSE	17	2	19	17,2	1	SNP	0.105263
A|missense_variant|MODERATE|F36A2.9|WBGene00009456|transcript|F36A2.9b.1|protein_coding|4/11|c.766T>A|p.Trp256Arg|769/2081|766/1698|256/565||,A|missense_variant|MODERATE|F36A2.9|WBGene00009456|transcript|F36A2.9a.1|protein_coding|4/10|c.766T>A|p.Trp256Arg|769/1969|766/1587|256/528||,A|upstream_gene_variant|MODIFIER|rps-15|WBGene00004484|transcript|F36A2.6.1|protein_coding||c.-2030A>T|||||2022|,A|…	PRDE1	1	I	8818215	T	A	F36A2.9	MODERATE	missense_variant	MISSENSE	FALSE	FALSE	17	2	19	17,2	1	SNP	0.105263
CT|frameshift_variant|HIGH|ubr-5|WBGene00009460|transcript|F36A2.13.1|protein_coding|9/29|c.1626dupA|p.Ala543fs|1707/9286|1626/8835|542/2944||,CT|frameshift_variant|HIGH|ubr-5|WBGene00009460|transcript|F36A2.13.2|protein_coding|9/29|c.1626dupA|p.Ala543fs|1693/9272|1626/8835|542/2944||,CT|upstream_gene_variant|MODIFIER|F29D10.1|WBGene00009250|transcript|F29D10.1.1|protein_coding||c.-4022_-4021insT…	PRDE1	1	I	8836612	C	CT	ubr-5	HIGH	frameshift_variant	OTHER	TRUE	FALSE	31	7	38	31,7	1	Insertion	0.184211
CT|frameshift_variant|HIGH|T08G11.1|WBGene00011629|transcript|T08G11.1a.1|protein_coding|17/22|c.7818dupA|p.Gly2607fs|7819/9862|7818/9639|2606/3212||,CT|frameshift_variant|HIGH|T08G11.1|WBGene00011629|transcript|T08G11.1b.1|protein_coding|16/21|c.7737dupA|p.Gly2580fs|7738/9781|7737/9558|2579/3185||,CT|upstream_gene_variant|MODIFIER|T08G11.4|WBGene00011631|transcript|T08G11.4a.1|protein_coding||c.…	PRDE1	1	I	8907959	C	CT	T08G11.1	HIGH	frameshift_variant	OTHER	TRUE	FALSE	116	44	160	116,44	1	Insertion	0.275
CT|frameshift_variant|HIGH|fcp-1|WBGene00009479|transcript|F36F2.6.1|protein_coding|8/9|c.1770dupA|p.Gly591fs|1770/2469|1770/1980|590/659||,CT|upstream_gene_variant|MODIFIER|F36F2.7|WBGene00009480|transcript|F36F2.7.1|protein_coding||c.-3900dupA|||||3759|,CT|upstream_gene_variant|MODIFIER|syx-7|WBGene00009478|transcript|F36F2.4.1|protein_coding||c.-1541dupA|||||1517|,CT|upstream_gene_variant|MODI…	PRDE1	1	I	9005479	C	CT	fcp-1	HIGH	frameshift_variant	OTHER	TRUE	FALSE	49	17	66	49,17	1	Insertion	0.257576
GT|frameshift_variant|HIGH|fcp-1|WBGene00009479|transcript|F36F2.6.1|protein_coding|5/9|c.884dupA|p.Asn295fs|884/2469|884/1980|295/659||,GT|upstream_gene_variant|MODIFIER|F36F2.7|WBGene00009480|transcript|F36F2.7.1|protein_coding||c.-4963dupA|||||4822|,GT|upstream_gene_variant|MODIFIER|syx-7|WBGene00009478|transcript|F36F2.4.1|protein_coding||c.-2604dupA|||||2580|,GT|upstream_gene_variant|MODIFIE…	PRDE1	1	I	9006542	G	GT	fcp-1	HIGH	frameshift_variant	OTHER	TRUE	FALSE	25	5	30	25,5	1	Insertion	0.166667
CT|frameshift_variant|HIGH|rbpl-1|WBGene00009477|transcript|F36F2.3a.1|protein_coding|11/14|c.2477dupA|p.Lys827fs|2504/3414|2477/3387|826/1128||,CT|upstream_gene_variant|MODIFIER|fcp-1|WBGene00009479|transcript|F36F2.6.1|protein_coding||c.-1696dupA|||||1696|,CT|downstream_gene_variant|MODIFIER|21ur-12977|WBGene00165095|transcript|F36F2.9|pseudogene||n.*1858_*1859insT|||||1859|,CT|downstream_gene_…	PRDE1	1	I	9010403	C	CT	rbpl-1	HIGH	frameshift_variant	OTHER	TRUE	FALSE	73	9	82	73,9	1	Insertion	0.109756
CT|frameshift_variant|HIGH|C31H5.4|WBGene00007855|transcript|C31H5.4.1|protein_coding|1/1|c.69dupA|p.Val24fs|90/330|69/183|23/60||,CT|upstream_gene_variant|MODIFIER|C31H5.10|WBGene00202152|transcript|C31H5.10|lincRNA||n.-3159dupA|||||3159|,CT|downstream_gene_variant|MODIFIER|C31H5.9|WBGene00202130|transcript|C31H5.9|lincRNA||n.*2786_*2787insT|||||2787|,CT|downstream_gene_variant|MODIFIER|C31H5.8|…	PRDE1	1	I	9042509	C	CT	C31H5.4	HIGH	frameshift_variant	OTHER	TRUE	FALSE	11	4	15	11,4	1	Insertion	0.266667
GT|frameshift_variant|HIGH|rsbp-1|WBGene00011531|transcript|T06D10.1.1|protein_coding|4/6|c.304dupA|p.Thr102fs|757/1741|304/516|102/171||,GT|frameshift_variant|HIGH|rsbp-1|WBGene00011531|transcript|T06D10.1.2|protein_coding|4/6|c.304dupA|p.Thr102fs|757/1138|304/516|102/171||,GT|upstream_gene_variant|MODIFIER|T06D10.7|WBGene00198061|transcript|T06D10.7|lincRNA||n.-1999_-1998insT|||||1998|,GT|downs…	PRDE1	1	I	9072582	G	GT	rsbp-1	HIGH	frameshift_variant	OTHER	TRUE	FALSE	9	2	11	9,2	1	Insertion	0.181818
CT|frameshift_variant|HIGH|chaf-1|WBGene00011532|transcript|T06D10.2.1|protein_coding|4/8|c.687dupA|p.Val230fs|700/1775|687/1440|229/479||,CT|upstream_gene_variant|MODIFIER|rsbp-1|WBGene00011531|transcript|T06D10.1.1|protein_coding||c.-4556dupA|||||4103|,CT|upstream_gene_variant|MODIFIER|T06D10.8|WBGene00303078|transcript|T06D10.8.1|protein_coding||c.-4111dupA|||||4103|,CT|upstream_gene_variant|M…	PRDE1	1	I	9079179	C	CT	chaf-1	HIGH	frameshift_variant	OTHER	TRUE	FALSE	42	8	50	42,8	1	Insertion	0.16
CA|frameshift_variant|HIGH|gld-4|WBGene00014115|transcript|ZK858.1.1|protein_coding|6/9|c.1485dupA|p.Glu496fs|1486/3175|1486/2538|496/845||INFO_REALIGN_3_PRIME,CA|upstream_gene_variant|MODIFIER|ZK858.10|WBGene00220246|transcript|ZK858.10|snoRNA||n.-2524_-2523insA|||||2523|,CA|upstream_gene_variant|MODIFIER|ZK858.8|WBGene00014121|transcript|ZK858.8.1|protein_coding||c.-4728_-4727insA|||||4663|,CA|…	PRDE1	1	I	9120000	C	CA	gld-4	HIGH	frameshift_variant	OTHER	TRUE	FALSE	88	19	107	88,19	1	Insertion	0.17757
A|frameshift_variant|HIGH|ZK858.5|WBGene00014118|transcript|ZK858.5.1|protein_coding|9/11|c.840delA|p.Lys280fs|845/1318|840/1230|280/409||,A|upstream_gene_variant|MODIFIER|ZK858.9|WBGene00201319|transcript|ZK858.9|lincRNA||n.-2828delT|||||2828|,A|downstream_gene_variant|MODIFIER|mel-26|WBGene00003209|transcript|ZK858.4b.1|protein_coding||c.*1102delT|||||591|,A|downstream_gene_variant|MODIFIER|ZK8…	PRDE1	1	I	9136343	AT	A	ZK858.5	HIGH	frameshift_variant	OTHER	TRUE	FALSE	25	3	28	25,3	1	Deletion	0.107143
A|missense_variant|MODERATE|ZK858.5|WBGene00014118|transcript|ZK858.5.1|protein_coding|9/11|c.839A>T|p.Lys280Ile|844/1318|839/1230|280/409||,A|upstream_gene_variant|MODIFIER|ZK858.9|WBGene00201319|transcript|ZK858.9|lincRNA||n.-2827T>A|||||2827|,A|downstream_gene_variant|MODIFIER|mel-26|WBGene00003209|transcript|ZK858.4b.1|protein_coding||c.*1103T>A|||||592|,A|downstream_gene_variant|MODIFIER|ZK8…	PRDE1	1	I	9136345	T	A	ZK858.5	MODERATE	missense_variant	MISSENSE	FALSE	FALSE	25	3	28	25,3	1	SNP	0.107143
CT|frameshift_variant|HIGH|clsp-1|WBGene00009127|transcript|F25H5.5a.1|protein_coding|7/8|c.1844dupA|p.Lys616fs|1844/2407|1844/2259|615/752||,CT|frameshift_variant|HIGH|clsp-1|WBGene00009127|transcript|F25H5.5b.1|protein_coding|2/3|c.293dupA|p.Lys99fs|293/852|293/708|98/235||,CT|upstream_gene_variant|MODIFIER|mrpl-54|WBGene00009128|transcript|F25H5.6.1|protein_coding||c.-1178dupA|||||1178|,CT|ups…	PRDE1	1	I	9160699	C	CT	clsp-1	HIGH	frameshift_variant	OTHER	TRUE	FALSE	18	8	26	18,8	1	Insertion	0.307692
GT|frameshift_variant|HIGH|clsp-1|WBGene00009127|transcript|F25H5.5a.1|protein_coding|6/8|c.1243dupA|p.Thr415fs|1243/2407|1243/2259|415/752||,GT|upstream_gene_variant|MODIFIER|mrpl-54|WBGene00009128|transcript|F25H5.6.1|protein_coding||c.-1846dupA|||||1846|,GT|upstream_gene_variant|MODIFIER|eef-2|WBGene00001167|transcript|F25H5.4a.1|protein_coding||c.-2287_-2286insT|||||2163|,GT|upstream_gene_var…	PRDE1	1	I	9161367	G	GT	clsp-1	HIGH	frameshift_variant	OTHER	TRUE	FALSE	47	10	57	47,10	1	Insertion	0.175439
AT|frameshift_variant|HIGH|clsp-1|WBGene00009127|transcript|F25H5.5a.1|protein_coding|5/8|c.809dupA|p.Asn270fs|809/2407|809/2259|270/752||,AT|upstream_gene_variant|MODIFIER|mrpl-54|WBGene00009128|transcript|F25H5.6.1|protein_coding||c.-2694dupA|||||2694|,AT|upstream_gene_variant|MODIFIER|eef-2|WBGene00001167|transcript|F25H5.4a.1|protein_coding||c.-1439_-1438insT|||||1315|,AT|upstream_gene_varian…	PRDE1	1	I	9162215	A	AT	clsp-1	HIGH	frameshift_variant	OTHER	TRUE	FALSE	13	4	17	13,4	1	Insertion	0.235294
CT|frameshift_variant|HIGH|aspm-1|WBGene00008107|transcript|C45G3.1.1|protein_coding|8/8|c.3495dupA|p.Val1166fs|3502/3741|3495/3561|1165/1186||,CT|upstream_gene_variant|MODIFIER|lim-9|WBGene00006407|transcript|F25H5.1i.1|protein_coding||c.-1345dupA|||||1307|,CT|upstream_gene_variant|MODIFIER|C45G3.3|WBGene00001590|transcript|C45G3.3.1|protein_coding||c.-4919_-4918insT|||||4832|,CT|upstream_gene_v…	PRDE1	1	I	9222072	C	CT	aspm-1	HIGH	frameshift_variant	OTHER	FALSE	FALSE	63	9	72	63,9	1	Insertion	0.125
CA|frameshift_variant|HIGH|M04C9.3|WBGene00010858|transcript|M04C9.3a.1|protein_coding|5/7|c.389dupT|p.Leu130fs|425/741|389/627|130/208||,CA|frameshift_variant|HIGH|M04C9.3|WBGene00010858|transcript|M04C9.3b.1|protein_coding|4/6|c.368dupT|p.Leu123fs|377/696|368/606|123/201||,CA|upstream_gene_variant|MODIFIER|M04C9.2|WBGene00010857|transcript|M04C9.2.1|protein_coding||c.-3939dupT|||||3939|,CA|upst…	PRDE1	1	I	9353496	C	CA	M04C9.3	HIGH	frameshift_variant	OTHER	TRUE	FALSE	9	2	11	9,2	1	Insertion	0.181818
AT|frameshift_variant|HIGH|ppfr-1|WBGene00008878|transcript|F16A11.3d.1|protein_coding|12/26|c.1687dupA|p.Ile563fs|1687/5291|1687/4689|563/1562||,AT|frameshift_variant|HIGH|ppfr-1|WBGene00008878|transcript|F16A11.3b.1|protein_coding|10/23|c.1471dupA|p.Ile491fs|1520/4822|1471/4095|491/1364||,AT|frameshift_variant|HIGH|ppfr-1|WBGene00008878|transcript|F16A11.3a.1|protein_coding|10/24|c.1471dupA|p.I…	PRDE1	1	I	9370568	A	AT	ppfr-1	HIGH	frameshift_variant	OTHER	TRUE	FALSE	24	6	30	24,6	1	Insertion	0.2
GA|frameshift_variant|HIGH|C17E4.6|WBGene00007645|transcript|C17E4.6.1|protein_coding|4/7|c.523dupA|p.Arg175fs|534/1720|524/1176|175/391||INFO_REALIGN_3_PRIME,GA|upstream_gene_variant|MODIFIER|marc-3|WBGene00007643|transcript|C17E4.3.1|protein_coding||c.-4349dupT|||||4338|,GA|upstream_gene_variant|MODIFIER|C17E4.11|WBGene00044236|transcript|C17E4.11.1|protein_coding||c.-2417dupT|||||2409|,GA|upst…	PRDE1	1	I	9423221	G	GA	C17E4.6	HIGH	frameshift_variant	OTHER	TRUE	FALSE	25	7	32	25,7	1	Insertion	0.21875
G|frameshift_variant|HIGH|F30A10.12|WBGene00009269|transcript|F30A10.12.1|protein_coding|2/3|c.212delA|p.Lys71fs|292/552|212/432|71/143||INFO_REALIGN_3_PRIME,G|upstream_gene_variant|MODIFIER|F30A10.13|WBGene00044680|transcript|F30A10.13a.1|protein_coding||c.-2891delT|||||2873|,G|upstream_gene_variant|MODIFIER|F30A10.2|WBGene00009261|transcript|F30A10.2.1|protein_coding||c.-1424delT|||||1190|,G|up…	PRDE1	1	I	9481963	GA	G	F30A10.12	HIGH	frameshift_variant	OTHER	TRUE	FALSE	9	2	11	9,2	1	Deletion	0.181818
AT|frameshift_variant|HIGH|rba-1|WBGene00004312|transcript|K07A1.11.1|protein_coding|4/6|c.901dupA|p.Met301fs|907/1343|901/1239|301/412||,AT|upstream_gene_variant|MODIFIER|ate-1|WBGene00010615|transcript|K07A1.9a.1|protein_coding||c.-1975dupA|||||1970|,AT|upstream_gene_variant|MODIFIER|K07A1.10|WBGene00010616|transcript|K07A1.10.1|protein_coding||c.-735dupA|||||719|,AT|upstream_gene_variant|MODIF…	PRDE1	1	I	9617051	A	AT	rba-1	HIGH	frameshift_variant	OTHER	TRUE	FALSE	49	8	57	49,8	1	Insertion	0.140351
GA|frameshift_variant|HIGH|hsr-9|WBGene00002027|transcript|T05F1.6.1|protein_coding|4/10|c.382dupA|p.Ile128fs|417/4022|383/3498|128/1165||INFO_REALIGN_3_PRIME,GA|upstream_gene_variant|MODIFIER|rps-19|WBGene00004488|transcript|T05F1.3.1|protein_coding||c.-1117dupT|||||1112|,GA|upstream_gene_variant|MODIFIER|T05F1.4|WBGene00011490|transcript|T05F1.4.1|protein_coding||c.-4489_-4488insA|||||4480|,GA|…	PRDE1	1	I	9626907	G	GA	hsr-9	HIGH	frameshift_variant	OTHER	TRUE	FALSE	139	20	159	139,20	1	Insertion	0.125786
CA|frameshift_variant|HIGH|hsr-9|WBGene00002027|transcript|T05F1.6.1|protein_coding|5/10|c.811dupA|p.Ile271fs|846/4022|812/3498|271/1165||INFO_REALIGN_3_PRIME,CA|upstream_gene_variant|MODIFIER|rps-19|WBGene00004488|transcript|T05F1.3.1|protein_coding||c.-1595dupT|||||1590|,CA|upstream_gene_variant|MODIFIER|T05F1.4|WBGene00011490|transcript|T05F1.4.1|protein_coding||c.-4011_-4010insA|||||4002|,CA|…	PRDE1	1	I	9627385	C	CA	hsr-9	HIGH	frameshift_variant	OTHER	TRUE	FALSE	53	10	63	53,10	1	Insertion	0.15873
GA|frameshift_variant|HIGH|hsr-9|WBGene00002027|transcript|T05F1.6.1|protein_coding|7/10|c.2445dupA|p.Gly816fs|2480/4022|2446/3498|816/1165||INFO_REALIGN_3_PRIME,GA|upstream_gene_variant|MODIFIER|rps-19|WBGene00004488|transcript|T05F1.3.1|protein_coding||c.-3324dupT|||||3319|,GA|upstream_gene_variant|MODIFIER|T05F1.4|WBGene00011490|transcript|T05F1.4.1|protein_coding||c.-2282_-2281insA|||||2273|,…	PRDE1	1	I	9629114	G	GA	hsr-9	HIGH	frameshift_variant	OTHER	TRUE	FALSE	111	23	134	111,23	1	Insertion	0.171642
GT|frameshift_variant|HIGH|npp-14|WBGene00003800|transcript|C03D6.4.1|protein_coding|4/7|c.2043dupA|p.Leu682fs|2045/4342|2043/4173|681/1390||,GT|upstream_gene_variant|MODIFIER|lab-1|WBGene00007278|transcript|C03D6.6.1|protein_coding||c.-4905dupA|||||4838|,GT|upstream_gene_variant|MODIFIER|C03D6.9|WBGene00219796|transcript|C03D6.9.1|protein_coding||c.-3681dupA|||||3672|,GT|upstream_gene_variant|MO…	PRDE1	1	I	9662708	G	GT	npp-14	HIGH	frameshift_variant	OTHER	TRUE	FALSE	12	3	15	12,3	1	Insertion	0.2
GA|frameshift_variant|HIGH|npp-14|WBGene00003800|transcript|C03D6.4.1|protein_coding|1/7|c.82dupT|p.Ser28fs|84/4342|82/4173|28/1390||,GA|upstream_gene_variant|MODIFIER|cel-1|WBGene00000466|transcript|C03D6.3a.1|protein_coding||c.-480_-479insA|||||362|,GA|upstream_gene_variant|MODIFIER|rpl-24.2|WBGene00004437|transcript|C03D6.8.1|protein_coding||c.-4590_-4589insA|||||4583|,GA|upstream_gene_variant…	PRDE1	1	I	9664831	G	GA	npp-14	HIGH	frameshift_variant	OTHER	FALSE	FALSE	9	4	13	9,4	1	Insertion	0.307692
CT|frameshift_variant|HIGH|ocrl-1|WBGene00007620|transcript|C16C2.3a.1|protein_coding|2/14|c.87dupA|p.Gly30fs|87/2604|87/2307|29/768||,CT|3_prime_UTR_variant|MODIFIER|ceh-5|WBGene00000430|transcript|C16C2.1.1|protein_coding|3/3|c.*72dupT|||||73|INFO_REALIGN_3_PRIME,CT|upstream_gene_variant|MODIFIER|C16C2.9|WBGene00201181|transcript|C16C2.9|lincRNA||n.-3532_-3531insT|||||3531|,CT|downstream_gene_v…	PRDE1	1	I	9727953	C	CT	ocrl-1	HIGH	frameshift_variant	OTHER	FALSE	FALSE	31	10	41	31,10	1	Insertion	0.243902
AT|frameshift_variant|HIGH|drsh-1|WBGene00009163|transcript|F26E4.10a.1|protein_coding|1/8|c.178dupA|p.Ile60fs|178/3394|178/3261|60/1086||,AT|frameshift_variant|HIGH|drsh-1|WBGene00009163|transcript|F26E4.10b.1|protein_coding|1/8|c.178dupA|p.Ile60fs|178/3359|178/3246|60/1081||,AT|upstream_gene_variant|MODIFIER|cox-5B|WBGene00000371|transcript|F26E4.9.1|protein_coding||c.-3465_-3464insT|||||3464|,…	PRDE1	1	I	9785544	A	AT	drsh-1	HIGH	frameshift_variant	OTHER	TRUE	FALSE	14	5	19	14,5	1	Insertion	0.263158
TA|frameshift_variant|HIGH|K10C3.5|WBGene00010732|transcript|K10C3.5a.1|protein_coding|5/6|c.2247dupA|p.Leu750fs|2257/2819|2248/2685|750/894||INFO_REALIGN_3_PRIME,TA|upstream_gene_variant|MODIFIER|nhr-49|WBGene00003639|transcript|K10C3.6c.1|protein_coding||c.-1998_-1997insA|||||1942|,TA|upstream_gene_variant|MODIFIER|nhr-49|WBGene00003639|transcript|K10C3.6c.2|protein_coding||c.-1998_-1997insA|||…	PRDE1	1	I	9867720	T	TA	K10C3.5	HIGH	frameshift_variant	OTHER	TRUE	FALSE	6	4	10	6,4	1	Insertion	0.4
CT|frameshift_variant|HIGH|Y106G6A.1|WBGene00013694|transcript|Y106G6A.1.1|protein_coding|1/7|c.45dupA|p.Val16fs|270/1650|45/1293|15/430||,CT|frameshift_variant|HIGH|Y106G6A.1|WBGene00013694|transcript|Y106G6A.1.2|protein_coding|1/7|c.45dupA|p.Val16fs|192/1570|45/1293|15/430||,CT|upstream_gene_variant|MODIFIER|epg-8|WBGene00013695|transcript|Y106G6A.2a.1|protein_coding||c.-3860dupA|||||3819|,CT|u…	PRDE1	1	I	9938108	C	CT	Y106G6A.1	HIGH	frameshift_variant	OTHER	FALSE	FALSE	17	7	24	17,7	1	Insertion	0.291667
CT|frameshift_variant|HIGH|eif-3.C|WBGene00001226|transcript|T23D8.4.1|protein_coding|3/5|c.747dupA|p.Glu250fs|749/3044|747/2697|249/898||,CT|frameshift_variant|HIGH|eif-3.C|WBGene00001226|transcript|T23D8.4.2|protein_coding|3/6|c.747dupA|p.Glu250fs|749/2897|747/2697|249/898||,CT|frameshift_variant|HIGH|eif-3.C|WBGene00001226|transcript|T23D8.4.3|protein_coding|3/6|c.747dupA|p.Glu250fs|749/2883|7…	PRDE1	1	I	9978784	C	CT	eif-3.C	HIGH	frameshift_variant	OTHER	TRUE	FALSE	279	44	323	279,44	1	Insertion	0.136223
CA|frameshift_variant|HIGH|C25A1.16|WBGene00077526|transcript|C25A1.16a.1|protein_coding|1/3|c.40dupA|p.Ile14fs|261/632|41/312|14/103||INFO_REALIGN_3_PRIME,CA|frameshift_variant|HIGH|C25A1.16|WBGene00077526|transcript|C25A1.16a.2|protein_coding|1/3|c.40dupA|p.Ile14fs|275/646|41/312|14/103||INFO_REALIGN_3_PRIME,CA|upstream_gene_variant|MODIFIER|C25A1.17|WBGene00077527|transcript|C25A1.17|pseudogen…	PRDE1	1	I	10179271	C	CA	C25A1.16	HIGH	frameshift_variant	OTHER	TRUE	FALSE	83	36	119	83,36	1	Insertion	0.302521
CT|frameshift_variant|HIGH|dao-5|WBGene00000931|transcript|C25A1.10a.1|protein_coding|4/5|c.2295dupA|p.Ala766fs|2311/3158|2295/2916|765/971||,CT|frameshift_variant|HIGH|dao-5|WBGene00000931|transcript|C25A1.10a.2|protein_coding|4/5|c.2295dupA|p.Ala766fs|2311/3189|2295/2916|765/971||,CT|frameshift_variant|HIGH|dao-5|WBGene00000931|transcript|C25A1.10b.2|protein_coding|5/6|c.1470dupA|p.Ala491fs|148…	PRDE1	1	I	10188440	C	CT	dao-5	HIGH	frameshift_variant	OTHER	TRUE	FALSE	47	13	60	47,13	1	Insertion	0.216667
CT|frameshift_variant|HIGH|dao-5|WBGene00000931|transcript|C25A1.10a.1|protein_coding|4/5|c.2196dupA|p.Glu733fs|2212/3158|2196/2916|732/971||,CT|frameshift_variant|HIGH|dao-5|WBGene00000931|transcript|C25A1.10a.2|protein_coding|4/5|c.2196dupA|p.Glu733fs|2212/3189|2196/2916|732/971||,CT|frameshift_variant|HIGH|dao-5|WBGene00000931|transcript|C25A1.10b.2|protein_coding|5/6|c.1371dupA|p.Glu458fs|138…	PRDE1	1	I	10188539	C	CT	dao-5	HIGH	frameshift_variant	OTHER	TRUE	FALSE	40	9	49	40,9	1	Insertion	0.183673
CT|frameshift_variant|HIGH|ced-12|WBGene00000426|transcript|Y106G6E.5b.1|protein_coding|4/8|c.1174dupA|p.Ser392fs|1190/2322|1174/2217|392/738||,CT|frameshift_variant|HIGH|ced-12|WBGene00000426|transcript|Y106G6E.5a.1|protein_coding|4/8|c.1153dupA|p.Ser385fs|1153/2288|1153/2196|385/731||,CT|frameshift_variant|HIGH|ced-12|WBGene00000426|transcript|Y106G6E.5a.2|protein_coding|4/8|c.1153dupA|p.Ser385…	PRDE1	1	I	10224236	C	CT	ced-12	HIGH	frameshift_variant	OTHER	TRUE	FALSE	38	11	49	38,11	1	Insertion	0.22449
G|missense_variant|MODERATE|ZC247.1|WBGene00013859|transcript|ZC247.1.1|protein_coding|8/11|c.11212T>C|p.Tyr3738His|11212/13321|11212/13170|3738/4389||,G|upstream_gene_variant|MODIFIER|ZC247.2|WBGene00013860|transcript|ZC247.2.1|protein_coding||c.-4636T>C|||||4489|	PRDE1	1	I	10266739	A	G	ZC247.1	MODERATE	missense_variant	MISSENSE	FALSE	FALSE	20	44	64	20,44	1	SNP	0.6875
A|synonymous_variant|LOW|ZC247.1|WBGene00013859|transcript|ZC247.1.1|protein_coding|8/11|c.11175C>T|p.Ser3725Ser|11175/13321|11175/13170|3725/4389||,A|upstream_gene_variant|MODIFIER|ZC247.2|WBGene00013860|transcript|ZC247.2.1|protein_coding||c.-4673C>T|||||4526|	PRDE1	1	I	10266776	G	A	ZC247.1	LOW	synonymous_variant	SILENT	FALSE	FALSE	42	44	86	42,44	1	SNP	0.511628
A|synonymous_variant|LOW|ZC247.1|WBGene00013859|transcript|ZC247.1.1|protein_coding|8/11|c.11140C>T|p.Leu3714Leu|11140/13321|11140/13170|3714/4389||,A|upstream_gene_variant|MODIFIER|ZC247.2|WBGene00013860|transcript|ZC247.2.1|protein_coding||c.-4708C>T|||||4561|	PRDE1	1	I	10266811	G	A	ZC247.1	LOW	synonymous_variant	SILENT	FALSE	FALSE	80	12	92	80,12	1	SNP	0.130435
C|missense_variant|MODERATE|ZC247.1|WBGene00013859|transcript|ZC247.1.1|protein_coding|8/11|c.11131T>G|p.Ser3711Ala|11131/13321|11131/13170|3711/4389||,C|upstream_gene_variant|MODIFIER|ZC247.2|WBGene00013860|transcript|ZC247.2.1|protein_coding||c.-4717T>G|||||4570|	PRDE1	1	I	10266820	A	C	ZC247.1	MODERATE	missense_variant	MISSENSE	FALSE	FALSE	72	14	86	72,14	1	SNP	0.162791
A|missense_variant|MODERATE|ZC247.1|WBGene00013859|transcript|ZC247.1.1|protein_coding|7/11|c.1004C>T|p.Ala335Val|1004/13321|1004/13170|335/4389||,A|upstream_gene_variant|MODIFIER|T20F10.10|WBGene00198011|transcript|T20F10.10|lincRNA||n.-1187G>A|||||1187|	PRDE1	1	I	10276987	G	A	ZC247.1	MODERATE	missense_variant	MISSENSE	FALSE	FALSE	15	3	18	15,3	1	SNP	0.166667
CT|frameshift_variant|HIGH|ZC434.4|WBGene00013892|transcript|ZC434.4.1|protein_coding|1/5|c.33dupA|p.Val12fs|56/935|33/813|11/270||,CT|upstream_gene_variant|MODIFIER|ears-1|WBGene00001337|transcript|ZC434.5.1|protein_coding||c.-3387_-3386insT|||||3368|,CT|upstream_gene_variant|MODIFIER|ears-1|WBGene00001337|transcript|ZC434.5.2|protein_coding||c.-3387_-3386insT|||||3368|,CT|downstream_gene_varian…	PRDE1	1	I	10333026	C	CT	ZC434.4	HIGH	frameshift_variant	OTHER	FALSE	FALSE	17	8	25	17,8	1	Insertion	0.32
GA|frameshift_variant|HIGH|ears-1|WBGene00001337|transcript|ZC434.5.1|protein_coding|2/7|c.972dupA|p.Gly325fs|991/3531|973/3450|325/1149||INFO_REALIGN_3_PRIME,GA|frameshift_variant|HIGH|ears-1|WBGene00001337|transcript|ZC434.5.2|protein_coding|2/6|c.972dupA|p.Gly325fs|991/3554|973/3450|325/1149||INFO_REALIGN_3_PRIME,GA|upstream_gene_variant|MODIFIER|ZC434.4|WBGene00013892|transcript|ZC434.4.1|pro…	PRDE1	1	I	10337439	G	GA	ears-1	HIGH	frameshift_variant	OTHER	TRUE	FALSE	72	15	87	72,15	1	Insertion	0.172414
TA|frameshift_variant|HIGH|aph-2|WBGene00000148|transcript|ZC434.6b.1|protein_coding|7/8|c.1914dupA|p.Val639fs|1947/2378|1915/2172|639/723||INFO_REALIGN_3_PRIME,TA|frameshift_variant|HIGH|aph-2|WBGene00000148|transcript|ZC434.6a.1|protein_coding|7/8|c.1908dupA|p.Val637fs|1941/2372|1909/2166|637/721||INFO_REALIGN_3_PRIME,TA|upstream_gene_variant|MODIFIER|coa-6|WBGene00013893|transcript|ZC434.7a.1|…	PRDE1	1	I	10344638	T	TA	aph-2	HIGH	frameshift_variant	OTHER	TRUE	FALSE	11	4	15	11,4	1	Insertion	0.266667
C|5_prime_UTR_premature_start_codon_gain_variant|LOW|ZC434.8|WBGene00013894|transcript|ZC434.8.1|protein_coding|1/4|c.-47C>G||||||,C|5_prime_UTR_premature_start_codon_gain_variant|LOW|ZC434.8|WBGene00013894|transcript|ZC434.8.2|protein_coding|1/4|c.-47C>G||||||,C|5_prime_UTR_variant|MODIFIER|ZC434.8|WBGene00013894|transcript|ZC434.8.1|protein_coding|1/4|c.-47C>G|||||47|,C|5_prime_UTR_variant|MODI…	PRDE1	1	I	10349366	G	C	ZC434.8	LOW	5_prime_UTR_premature_start_codon_gain_variant	OTHER	FALSE	FALSE	14	2	16	14,2	1	SNP	0.125
G|missense_variant|MODERATE|mus-101|WBGene00009507|transcript|F37D6.1.1|protein_coding|6/17|c.869T>C|p.Met290Thr|877/3692|869/3549|290/1182||,G|upstream_gene_variant|MODIFIER|F37D6.3|WBGene00009509|transcript|F37D6.3.1|protein_coding||c.-2885A>G|||||2885|,G|upstream_gene_variant|MODIFIER|F37D6.4|WBGene00009510|transcript|F37D6.4.1|protein_coding||c.-4819A>G|||||4819|	PRDE1	1	I	10483829	A	G	mus-101	MODERATE	missense_variant	MISSENSE	FALSE	FALSE	8	2	10	8,2	1	SNP	0.2
TA|frameshift_variant|HIGH|rtel-1|WBGene00009124|transcript|F25H2.13.1|protein_coding|10/14|c.2342dupA|p.Gln782fs|2344/3107|2343/2985|781/994||INFO_REALIGN_3_PRIME,TA|frameshift_variant|HIGH|rtel-1|WBGene00009124|transcript|F25H2.13.2|protein_coding|11/15|c.2342dupA|p.Gln782fs|2358/3121|2343/2985|781/994||INFO_REALIGN_3_PRIME,TA|upstream_gene_variant|MODIFIER|F29C6.1|WBGene00009243|transcript|F29…	PRDE1	1	I	10575911	T	TA	rtel-1	HIGH	frameshift_variant	OTHER	TRUE	FALSE	14	3	17	14,3	1	Insertion	0.176471
CA|frameshift_variant|HIGH|rtel-1|WBGene00009124|transcript|F25H2.13.1|protein_coding|11/14|c.2690dupA|p.Lys898fs|2692/3107|2691/2985|897/994||INFO_REALIGN_3_PRIME,CA|frameshift_variant|HIGH|rtel-1|WBGene00009124|transcript|F25H2.13.2|protein_coding|12/15|c.2690dupA|p.Lys898fs|2706/3121|2691/2985|897/994||INFO_REALIGN_3_PRIME,CA|upstream_gene_variant|MODIFIER|F29C6.1|WBGene00009243|transcript|F29…	PRDE1	1	I	10576561	C	CA	rtel-1	HIGH	frameshift_variant	OTHER	TRUE	FALSE	21	5	26	21,5	1	Insertion	0.192308
G|5_prime_UTR_premature_start_codon_gain_variant|LOW|pash-1|WBGene00011908|transcript|T22A3.5a.1|protein_coding|1/11|c.-7T>G||||||,G|5_prime_UTR_variant|MODIFIER|pash-1|WBGene00011908|transcript|T22A3.5a.1|protein_coding|1/11|c.-7T>G|||||7|,G|upstream_gene_variant|MODIFIER|T22A3.13|WBGene00271649|transcript|T22A3.13|lincRNA||n.-4768A>C|||||4768|,G|upstream_gene_variant|MODIFIER|mir-1828|WBGene000…	PRDE1	1	I	10598703	T	G	pash-1	LOW	5_prime_UTR_premature_start_codon_gain_variant	OTHER	FALSE	FALSE	10	2	12	10,2	1	SNP	0.166667
GT|frameshift_variant|HIGH|pash-1|WBGene00011908|transcript|T22A3.5a.1|protein_coding|10/11|c.1799dupT|p.Leu600fs|1837/2565|1800/2256|600/751||INFO_REALIGN_3_PRIME,GT|frameshift_variant|HIGH|pash-1|WBGene00011908|transcript|T22A3.5b.1|protein_coding|1/2|c.341dupT|p.Leu114fs|342/1067|342/798|114/265||INFO_REALIGN_3_PRIME,GT|upstream_gene_variant|MODIFIER|T22A3.t4|WBGene00014528|transcript|T22A3.t4…	PRDE1	1	I	10605373	G	GT	pash-1	HIGH	frameshift_variant	OTHER	TRUE	FALSE	29	5	34	29,5	1	Insertion	0.147059
GA|frameshift_variant|HIGH|B0511.6|WBGene00015232|transcript|B0511.6.1|protein_coding|2/6|c.948dupA|p.Val317fs|956/1806|949/1635|317/544||INFO_REALIGN_3_PRIME,GA|upstream_gene_variant|MODIFIER|cutl-14|WBGene00015231|transcript|B0511.5.1|protein_coding||c.-2433_-2432insA|||||2327|,GA|downstream_gene_variant|MODIFIER|lam-3|WBGene00002248|transcript|T22A3.8.1|protein_coding||c.*5071_*5072insA|||||49…	PRDE1	1	I	10626384	G	GA	B0511.6	HIGH	frameshift_variant	OTHER	TRUE	FALSE	14	3	17	14,3	1	Insertion	0.176471
C|frameshift_variant|HIGH|B0511.12|WBGene00015237|transcript|B0511.12a.1|protein_coding|16/26|c.3816delA|p.Val1273fs|3816/6894|3816/6738|1272/2245||,C|frameshift_variant|HIGH|B0511.12|WBGene00015237|transcript|B0511.12b.1|protein_coding|16/26|c.3738delA|p.Val1247fs|3794/6867|3738/6660|1246/2219||,C|downstream_gene_variant|MODIFIER|B0511.18|WBGene00219789|transcript|B0511.18|lincRNA||n.*2565delA||…	PRDE1	1	I	10659250	CT	C	B0511.12	HIGH	frameshift_variant	OTHER	TRUE	FALSE	9	2	11	9,2	1	Deletion	0.181818
CT|frameshift_variant|HIGH|B0205.1|WBGene00015017|transcript|B0205.1a.1|protein_coding|4/14|c.268dupA|p.Ser90fs|336/2614|268/2274|90/757||,CT|frameshift_variant|HIGH|B0205.1|WBGene00015017|transcript|B0205.1b.1|protein_coding|1/11|c.115dupA|p.Ser39fs|128/2406|115/2121|39/706||,CT|upstream_gene_variant|MODIFIER|B0205.9|WBGene00015023|transcript|B0205.9.1|protein_coding||c.-3957_-3956insT|||||3943|	PRDE1	1	I	10716869	C	CT	B0205.1	HIGH	frameshift_variant	OTHER	TRUE	FALSE	11	3	14	11,3	1	Insertion	0.214286
CT|frameshift_variant|HIGH|mrpl-9|WBGene00015025|transcript|B0205.11.1|protein_coding|3/5|c.300dupA|p.Ala101fs|328/954|300/831|100/276||,CT|upstream_gene_variant|MODIFIER|B0205.13|WBGene00044644|transcript|B0205.13.1|protein_coding||c.-4542dupA|||||4456|,CT|upstream_gene_variant|MODIFIER|B0205.8|WBGene00015022|transcript|B0205.8.1|protein_coding||c.-3046dupA|||||3031|,CT|upstream_gene_variant|MOD…	PRDE1	1	I	10733263	C	CT	mrpl-9	HIGH	frameshift_variant	OTHER	TRUE	FALSE	17	8	25	17,8	1	Insertion	0.32
CA|frameshift_variant|HIGH|F55A3.2|WBGene00018848|transcript|F55A3.2.1|protein_coding|4/5|c.1551dupA|p.Leu518fs|1918/2847|1552/2322|518/773||INFO_REALIGN_3_PRIME,CA|frameshift_variant|HIGH|F55A3.2|WBGene00018848|transcript|F55A3.2.2|protein_coding|4/5|c.1551dupA|p.Leu518fs|1678/2589|1552/2322|518/773||INFO_REALIGN_3_PRIME,CA|upstream_gene_variant|MODIFIER|marc-6|WBGene00018847|transcript|F55A3.1.…	PRDE1	1	I	10796696	C	CA	F55A3.2	HIGH	frameshift_variant	OTHER	TRUE	FALSE	21	4	25	21,4	1	Insertion	0.16
CT|frameshift_variant|HIGH|F49D11.10|WBGene00045433|transcript|F49D11.10.1|protein_coding|8/9|c.1683dupA|p.Gly562fs|1685/2392|1683/2184|561/727||,CT|frameshift_variant|HIGH|F49D11.10|WBGene00045433|transcript|F49D11.10.2|protein_coding|8/10|c.1683dupA|p.Gly562fs|1685/2302|1683/2184|561/727||,CT|upstream_gene_variant|MODIFIER|F49D11.7|WBGene00018631|transcript|F49D11.7.1|protein_coding||c.-4406dup…	PRDE1	1	I	10928304	C	CT	F49D11.10	HIGH	frameshift_variant	OTHER	TRUE	FALSE	22	5	27	22,5	1	Insertion	0.185185
CA|frameshift_variant|HIGH|prp-17|WBGene00018625|transcript|F49D11.1.1|protein_coding|3/4|c.1460dupA|p.Lys488fs|1480/1987|1461/1704|487/567||INFO_REALIGN_3_PRIME,CA|frameshift_variant|HIGH|prp-17|WBGene00018625|transcript|F49D11.1.2|protein_coding|3/4|c.1460dupA|p.Lys488fs|1482/1989|1461/1704|487/567||INFO_REALIGN_3_PRIME,CA|upstream_gene_variant|MODIFIER|tag-296|WBGene00018632|transcript|F49D11.…	PRDE1	1	I	10939589	C	CA	prp-17	HIGH	frameshift_variant	OTHER	TRUE	FALSE	17	3	20	17,3	1	Insertion	0.15
G|missense_variant|MODERATE|Y95D11A.1|WBGene00013605|transcript|Y95D11A.1.1|protein_coding|4/4|c.371A>G|p.Glu124Gly|371/556|371/435|124/144||,G|upstream_gene_variant|MODIFIER|Y95D11A.t1|WBGene00014605|transcript|Y95D11A.t1|protein_coding||c.-316A>G|||||316|WARNING_TRANSCRIPT_MULTIPLE_STOP_CODONS,G|downstream_gene_variant|MODIFIER|prp-17|WBGene00018625|transcript|F49D11.1.1|protein_coding||c.*5248…	PRDE1	1	I	10945505	A	G	Y95D11A.1	MODERATE	missense_variant	MISSENSE	FALSE	FALSE	8	2	10	8,2	1	SNP	0.2
C|missense_variant|MODERATE|Y95D11A.1|WBGene00013605|transcript|Y95D11A.1.1|protein_coding|4/4|c.372G>C|p.Glu124Asp|372/556|372/435|124/144||,C|upstream_gene_variant|MODIFIER|Y95D11A.t1|WBGene00014605|transcript|Y95D11A.t1|protein_coding||c.-315G>C|||||315|WARNING_TRANSCRIPT_MULTIPLE_STOP_CODONS,C|downstream_gene_variant|MODIFIER|prp-17|WBGene00018625|transcript|F49D11.1.1|protein_coding||c.*5249…	PRDE1	1	I	10945506	G	C	Y95D11A.1	MODERATE	missense_variant	MISSENSE	FALSE	FALSE	8	2	10	8,2	1	SNP	0.2
CA|frameshift_variant|HIGH|Y52B11A.3|WBGene00013123|transcript|Y52B11A.3a.1|protein_coding|6/9|c.1294dupA|p.Thr432fs|1300/1822|1295/1659|432/552||INFO_REALIGN_3_PRIME,CA|frameshift_variant|HIGH|Y52B11A.3|WBGene00013123|transcript|Y52B11A.3b.1|protein_coding|6/9|c.1186dupA|p.Thr396fs|1233/1755|1187/1551|396/516||INFO_REALIGN_3_PRIME,CA|downstream_gene_variant|MODIFIER|Y52B11A.4|WBGene00013124|tran…	PRDE1	1	I	10977904	C	CA	Y52B11A.3	HIGH	frameshift_variant	OTHER	TRUE	FALSE	10	11	21	10,11	1	Insertion	0.52381
CT|frameshift_variant|HIGH|dxbp-1|WBGene00013128|transcript|Y52B11A.9.1|protein_coding|3/5|c.711dupA|p.Glu238fs|719/1258|711/1215|237/404||,CT|frameshift_variant|HIGH|dxbp-1|WBGene00013128|transcript|Y52B11A.9.2|protein_coding|3/5|c.711dupA|p.Glu238fs|749/1288|711/1215|237/404||,CT|upstream_gene_variant|MODIFIER|Y52B11A.10|WBGene00013129|transcript|Y52B11A.10.1|protein_coding||c.-2226_-2225insT||…	PRDE1	1	I	11036836	C	CT	dxbp-1	HIGH	frameshift_variant	OTHER	TRUE	FALSE	57	14	71	57,14	1	Insertion	0.197183
T|missense_variant|MODERATE|hxk-2|WBGene00010416|transcript|H25P06.1.1|protein_coding|10/13|c.1148G>A|p.Arg383Gln|1166/1982|1148/1659|383/552||,T|upstream_gene_variant|MODIFIER|clpr-3|WBGene00010417|transcript|H25P06.4.1|protein_coding||c.-4268G>A|||||4268|	PRDE1	1	I	11315321	C	T	hxk-2	MODERATE	missense_variant	MISSENSE	FALSE	FALSE	19	10	29	19,10	1	SNP	0.344828
CA|frameshift_variant|HIGH|F56G4.4|WBGene00010159|transcript|F56G4.4.1|protein_coding|2/6|c.159dupA|p.Gln54fs|164/1479|160/1413|54/470||INFO_REALIGN_3_PRIME,CA|upstream_gene_variant|MODIFIER|F56G4.6|WBGene00010161|transcript|F56G4.6.1|protein_coding||c.-652dupT|||||636|	PRDE1	1	I	11374969	C	CA	F56G4.4	HIGH	frameshift_variant	OTHER	TRUE	FALSE	16	4	20	16,4	1	Insertion	0.2
GA|frameshift_variant|HIGH|F56G4.4|WBGene00010159|transcript|F56G4.4.1|protein_coding|4/6|c.879dupA|p.Ala294fs|884/1479|880/1413|294/470||INFO_REALIGN_3_PRIME,GA|upstream_gene_variant|MODIFIER|F56G4.6|WBGene00010161|transcript|F56G4.6.1|protein_coding||c.-3368dupT|||||3352|,GA|upstream_gene_variant|MODIFIER|png-1|WBGene00010160|transcript|F56G4.5.1|protein_coding||c.-2553_-2552insA|||||2545|,GA|d…	PRDE1	1	I	11377685	G	GA	F56G4.4	HIGH	frameshift_variant	OTHER	TRUE	FALSE	158	20	178	158,20	1	Insertion	0.11236
GA|frameshift_variant|HIGH|F56G4.4|WBGene00010159|transcript|F56G4.4.1|protein_coding|5/6|c.1198dupA|p.Ser400fs|1203/1479|1199/1413|400/470||INFO_REALIGN_3_PRIME,GA|upstream_gene_variant|MODIFIER|F56G4.6|WBGene00010161|transcript|F56G4.6.1|protein_coding||c.-4990dupT|||||4974|,GA|upstream_gene_variant|MODIFIER|png-1|WBGene00010160|transcript|F56G4.5.1|protein_coding||c.-931_-930insA|||||923|,GA|d…	PRDE1	1	I	11379307	G	GA	F56G4.4	HIGH	frameshift_variant	OTHER	TRUE	FALSE	83	11	94	83,11	1	Insertion	0.117021
GA|frameshift_variant|HIGH|F56G4.4|WBGene00010159|transcript|F56G4.4.1|protein_coding|5/6|c.1207dupA|p.Thr403fs|1212/1479|1208/1413|403/470||INFO_REALIGN_3_PRIME,GA|upstream_gene_variant|MODIFIER|F56G4.6|WBGene00010161|transcript|F56G4.6.1|protein_coding||c.-4999dupT|||||4983|,GA|upstream_gene_variant|MODIFIER|png-1|WBGene00010160|transcript|F56G4.5.1|protein_coding||c.-922_-921insA|||||914|,GA|d…	PRDE1	1	I	11379316	G	GA	F56G4.4	HIGH	frameshift_variant	OTHER	TRUE	FALSE	88	10	98	88,10	1	Insertion	0.102041
CA|frameshift_variant|HIGH|png-1|WBGene00010160|transcript|F56G4.5.1|protein_coding|8/10|c.1533dupA|p.Ser512fs|1541/1919|1534/1821|512/606||INFO_REALIGN_3_PRIME,CA|upstream_gene_variant|MODIFIER|Y53H1C.5|WBGene00195998|transcript|Y53H1C.5|lincRNA||n.-4157_-4156insA|||||4156|,CA|upstream_gene_variant|MODIFIER|Y53H1C.6|WBGene00196187|transcript|Y53H1C.6|lincRNA||n.-4392_-4391insA|||||4391|,CA|upstr…	PRDE1	1	I	11388245	C	CA	png-1	HIGH	frameshift_variant	OTHER	TRUE	FALSE	9	6	15	9,6	1	Insertion	0.4
CT|frameshift_variant|HIGH|ego-2|WBGene00001215|transcript|Y53H1C.2c.1|protein_coding|10/15|c.2010dupA|p.Glu671fs|2017/4876|2010/4485|670/1494||,CT|frameshift_variant|HIGH|ego-2|WBGene00001215|transcript|Y53H1C.2a.1|protein_coding|10/15|c.2010dupA|p.Glu671fs|2017/4870|2010/4479|670/1492||,CT|upstream_gene_variant|MODIFIER|Y53H1C.8|WBGene00198208|transcript|Y53H1C.8|lincRNA||n.-925_-924insT|||||92…	PRDE1	1	I	11406322	C	CT	ego-2	HIGH	frameshift_variant	OTHER	TRUE	FALSE	61	14	75	61,14	1	Insertion	0.186667
CA|frameshift_variant|HIGH|C27C7.1|WBGene00007766|transcript|C27C7.1.1|protein_coding|3/5|c.434dupA|p.Asn145fs|457/1105|435/816|145/271||INFO_REALIGN_3_PRIME,CA|upstream_gene_variant|MODIFIER|nhr-73|WBGene00003663|transcript|C27C7.4.1|protein_coding||c.-4088dupT|||||3943|,CA|upstream_gene_variant|MODIFIER|ZK1025.1|WBGene00014992|transcript|ZK1025.1|pseudogene||n.-3492_-3491insA|||||3491|,CA|downs…	PRDE1	1	I	11439960	C	CA	C27C7.1	HIGH	frameshift_variant	OTHER	TRUE	FALSE	29	8	37	29,8	1	Insertion	0.216216
G|synonymous_variant|LOW|dys-1|WBGene00001131|transcript|F15D3.1a.1|protein_coding|10/47|c.1869T>C|p.Gly623Gly|1928/11243|1869/11025|623/3674||,G|synonymous_variant|LOW|dys-1|WBGene00001131|transcript|F15D3.1c.1|protein_coding|6/43|c.1191T>C|p.Gly397Gly|1191/10506|1191/10347|397/3448||,G|synonymous_variant|LOW|dys-1|WBGene00001131|transcript|F15D3.1i.1|protein_coding|6/42|c.1191T>C|p.Gly397Gly|11…	PRDE1	1	I	11549914	A	G	dys-1	LOW	synonymous_variant	SILENT	FALSE	FALSE	10	2	12	10,2	1	SNP	0.166667
A|missense_variant|MODERATE|dys-1|WBGene00001131|transcript|F15D3.1a.1|protein_coding|10/47|c.1868G>T|p.Gly623Val|1927/11243|1868/11025|623/3674||,A|missense_variant|MODERATE|dys-1|WBGene00001131|transcript|F15D3.1c.1|protein_coding|6/43|c.1190G>T|p.Gly397Val|1190/10506|1190/10347|397/3448||,A|missense_variant|MODERATE|dys-1|WBGene00001131|transcript|F15D3.1i.1|protein_coding|6/42|c.1190G>T|p.Gly…	PRDE1	1	I	11549915	C	A	dys-1	MODERATE	missense_variant	MISSENSE	FALSE	FALSE	10	2	12	10,2	1	SNP	0.166667
CT|frameshift_variant|HIGH|vab-10|WBGene00006876|transcript|ZK1151.1l.1|protein_coding|1/25|c.546dupA|p.Ala183fs|546/15502|546/15180|182/5059||,CT|frameshift_variant|HIGH|vab-10|WBGene00006876|transcript|ZK1151.1m.1|protein_coding|1/24|c.546dupA|p.Ala183fs|546/15163|546/14841|182/4946||,CT|frameshift_variant|HIGH|vab-10|WBGene00006876|transcript|ZK1151.1i.1|protein_coding|1/11|c.546dupA|p.Ala183f…	PRDE1	1	I	11783393	C	CT	vab-10	HIGH	frameshift_variant	OTHER	TRUE	FALSE	38	7	45	38,7	1	Insertion	0.155556
G|missense_variant|MODERATE|T02G6.5|WBGene00011388|transcript|T02G6.5c.1|protein_coding|4/7|c.451A>G|p.Lys151Glu|451/1362|451/1362|151/453||,G|missense_variant|MODERATE|T02G6.5|WBGene00011388|transcript|T02G6.5b.1|protein_coding|4/7|c.439A>G|p.Lys147Glu|444/1399|439/1350|147/449||,G|missense_variant|MODERATE|T02G6.5|WBGene00011388|transcript|T02G6.5a.1|protein_coding|4/7|c.253A>G|p.Lys85Glu|253/1…	PRDE1	1	I	11817980	A	G	T02G6.5	MODERATE	missense_variant	MISSENSE	FALSE	FALSE	14	4	18	14,4	1	SNP	0.222222
GT|frameshift_variant|HIGH|ced-1|WBGene00000415|transcript|Y47H9C.4a.1|protein_coding|11/11|c.3309dupA|p.Arg1104fs|3315/3729|3309/3336|1103/1111||,GT|frameshift_variant|HIGH|ced-1|WBGene00000415|transcript|Y47H9C.4b.1|protein_coding|11/11|c.3186dupA|p.Arg1063fs|3192/3554|3186/3213|1062/1070||,GT|frameshift_variant|HIGH|ced-1|WBGene00000415|transcript|Y47H9C.4d.1|protein_coding|2/2|c.95dupA|p.Asn3…	PRDE1	1	I	11851979	G	GT	ced-1	HIGH	frameshift_variant	OTHER	TRUE	FALSE	20	4	24	20,4	1	Insertion	0.166667
CT|frameshift_variant|HIGH|ced-1|WBGene00000415|transcript|Y47H9C.4a.1|protein_coding|3/11|c.381dupA|p.Gly128fs|387/3729|381/3336|127/1111||,CT|frameshift_variant|HIGH|ced-1|WBGene00000415|transcript|Y47H9C.4b.1|protein_coding|3/11|c.381dupA|p.Gly128fs|387/3554|381/3213|127/1070||,CT|frameshift_variant|HIGH|ced-1|WBGene00000415|transcript|Y47H9C.4c.1|protein_coding|3/10|c.381dupA|p.Gly128fs|387/3…	PRDE1	1	I	11865963	C	CT	ced-1	HIGH	frameshift_variant	OTHER	TRUE	FALSE	13	5	18	13,5	1	Insertion	0.277778
CA|frameshift_variant|HIGH|fdps-1|WBGene00011058|transcript|R06C1.2.1|protein_coding|4/5|c.707dupT|p.Leu236fs|714/1258|707/1059|236/352||,CA|upstream_gene_variant|MODIFIER|hda-3|WBGene00001836|transcript|R06C1.1.1|protein_coding||c.-2691dupT|||||2684|,CA|upstream_gene_variant|MODIFIER|hda-3|WBGene00001836|transcript|R06C1.1.2|protein_coding||c.-2691dupT|||||2691|,CA|downstream_gene_variant|MODIFI…	PRDE1	1	I	11920402	C	CA	fdps-1	HIGH	frameshift_variant	OTHER	TRUE	FALSE	22	4	26	22,4	1	Insertion	0.153846
GT|frameshift_variant|HIGH|hsf-1|WBGene00002004|transcript|Y53C10A.12.1|protein_coding|5/8|c.792dupA|p.Leu265fs|814/2323|792/2016|264/671||	PRDE1	1	I	11958294	G	GT	hsf-1	HIGH	frameshift_variant	OTHER	TRUE	FALSE	21	4	25	21,4	1	Insertion	0.16
GA|frameshift_variant|HIGH|hsf-1|WBGene00002004|transcript|Y53C10A.12.1|protein_coding|2/8|c.404dupT|p.Lys136fs|426/2323|404/2016|135/671||	PRDE1	1	I	11959960	G	GA	hsf-1	HIGH	frameshift_variant	OTHER	TRUE	FALSE	14	3	17	14,3	1	Insertion	0.176471
GA|frameshift_variant|HIGH|pfd-3|WBGene00006889|transcript|T06G6.9.1|protein_coding|2/3|c.193dupA|p.Ile65fs|312/870|194/558|65/185||INFO_REALIGN_3_PRIME,GA|upstream_gene_variant|MODIFIER|T06G6.13|WBGene00195560|transcript|T06G6.13|lincRNA||n.-790dupT|||||790|,GA|upstream_gene_variant|MODIFIER|T06G6.15|WBGene00199408|transcript|T06G6.15|lincRNA||n.-568dupT|||||568|,GA|downstream_gene_variant|MODIF…	PRDE1	1	I	12728718	G	GA	pfd-3	HIGH	frameshift_variant	OTHER	TRUE	FALSE	9	4	13	9,4	1	Insertion	0.307692
AT|frameshift_variant|HIGH|attf-6|WBGene00012474|transcript|Y18D10A.1.1|protein_coding|13/15|c.4443dupA|p.Ser1482fs|4478/5206|4443/4905|1481/1634||	PRDE1	1	I	12791295	A	AT	attf-6	HIGH	frameshift_variant	OTHER	TRUE	FALSE	11	3	14	11,3	1	Insertion	0.214286
A|missense_variant|MODERATE|nhx-8|WBGene00003735|transcript|Y18D10A.6a.1|protein_coding|4/8|c.287C>A|p.Ala96Glu|415/2803|287/2046|96/681||,A|missense_variant|MODERATE|nhx-8|WBGene00003735|transcript|Y18D10A.6b.1|protein_coding|3/7|c.209C>A|p.Ala70Glu|284/2672|209/1968|70/655||,A|upstream_gene_variant|MODIFIER|ptr-17|WBGene00004231|transcript|Y18D10A.7c.1|protein_coding||c.-4715C>A|||||4715|,A|ups…	PRDE1	1	I	12829950	C	A	nhx-8	MODERATE	missense_variant	MISSENSE	FALSE	FALSE	10	2	12	10,2	1	SNP	0.166667
A|missense_variant|MODERATE|nhx-8|WBGene00003735|transcript|Y18D10A.6a.1|protein_coding|4/8|c.296T>A|p.Val99Asp|424/2803|296/2046|99/681||,A|missense_variant|MODERATE|nhx-8|WBGene00003735|transcript|Y18D10A.6b.1|protein_coding|3/7|c.218T>A|p.Val73Asp|293/2672|218/1968|73/655||,A|upstream_gene_variant|MODIFIER|ptr-17|WBGene00004231|transcript|Y18D10A.7c.1|protein_coding||c.-4706T>A|||||4706|,A|ups…	PRDE1	1	I	12829959	T	A	nhx-8	MODERATE	missense_variant	MISSENSE	FALSE	FALSE	8	2	10	8,2	1	SNP	0.2
T|synonymous_variant|LOW|nhx-8|WBGene00003735|transcript|Y18D10A.6a.1|protein_coding|4/8|c.297C>T|p.Val99Val|425/2803|297/2046|99/681||,T|synonymous_variant|LOW|nhx-8|WBGene00003735|transcript|Y18D10A.6b.1|protein_coding|3/7|c.219C>T|p.Val73Val|294/2672|219/1968|73/655||,T|upstream_gene_variant|MODIFIER|ptr-17|WBGene00004231|transcript|Y18D10A.7c.1|protein_coding||c.-4705C>T|||||4705|,T|upstream_…	PRDE1	1	I	12829960	C	T	nhx-8	LOW	synonymous_variant	SILENT	FALSE	FALSE	9	2	11	9,2	1	SNP	0.181818
C|missense_variant|MODERATE|nhx-8|WBGene00003735|transcript|Y18D10A.6a.1|protein_coding|4/8|c.299G>C|p.Gly100Ala|427/2803|299/2046|100/681||,C|missense_variant|MODERATE|nhx-8|WBGene00003735|transcript|Y18D10A.6b.1|protein_coding|3/7|c.221G>C|p.Gly74Ala|296/2672|221/1968|74/655||,C|upstream_gene_variant|MODIFIER|ptr-17|WBGene00004231|transcript|Y18D10A.7c.1|protein_coding||c.-4703G>C|||||4703|,C|u…	PRDE1	1	I	12829962	G	C	nhx-8	MODERATE	missense_variant	MISSENSE	FALSE	FALSE	9	2	11	9,2	1	SNP	0.181818
CA|frameshift_variant|HIGH|pad-1|WBGene00003905|transcript|Y18D10A.13.1|protein_coding|12/23|c.3348dupA|p.Gly1117fs|3362/7731|3349/7254|1117/2417||INFO_REALIGN_3_PRIME,CA|frameshift_variant|HIGH|pad-1|WBGene00003905|transcript|Y18D10A.13.2|protein_coding|12/23|c.3348dupA|p.Gly1117fs|3406/7775|3349/7254|1117/2417||INFO_REALIGN_3_PRIME	PRDE1	1	I	12889308	C	CA	pad-1	HIGH	frameshift_variant	OTHER	TRUE	FALSE	9	3	12	9,3	1	Insertion	0.25
A|missense_variant|MODERATE|pad-1|WBGene00003905|transcript|Y18D10A.13.1|protein_coding|13/23|c.4238T>A|p.Leu1413Gln|4251/7731|4238/7254|1413/2417||,A|missense_variant|MODERATE|pad-1|WBGene00003905|transcript|Y18D10A.13.2|protein_coding|13/23|c.4238T>A|p.Leu1413Gln|4295/7775|4238/7254|1413/2417||	PRDE1	1	I	12890596	T	A	pad-1	MODERATE	missense_variant	MISSENSE	FALSE	FALSE	11	5	16	11,5	1	SNP	0.3125
CA|frameshift_variant|HIGH|pad-1|WBGene00003905|transcript|Y18D10A.13.1|protein_coding|19/23|c.6242dupA|p.Asn2081fs|6256/7731|6243/7254|2081/2417||INFO_REALIGN_3_PRIME,CA|frameshift_variant|HIGH|pad-1|WBGene00003905|transcript|Y18D10A.13.2|protein_coding|19/23|c.6242dupA|p.Asn2081fs|6300/7775|6243/7254|2081/2417||INFO_REALIGN_3_PRIME	PRDE1	1	I	12897425	C	CA	pad-1	HIGH	frameshift_variant	OTHER	TRUE	FALSE	8	2	10	8,2	1	Insertion	0.2
GA|frameshift_variant|HIGH|efsc-1|WBGene00008133|transcript|C47B2.7b.1|protein_coding|8/8|c.1411dupA|p.Ile471fs|1412/1534|1412/1503|471/500||INFO_REALIGN_3_PRIME,GA|frameshift_variant|HIGH|efsc-1|WBGene00008133|transcript|C47B2.7a.1|protein_coding|7/7|c.1288dupA|p.Ile430fs|1289/1409|1289/1380|430/459||INFO_REALIGN_3_PRIME,GA|upstream_gene_variant|MODIFIER|C47B2.9|WBGene00008134|transcript|C47B2.9…	PRDE1	1	I	12982323	G	GA	efsc-1	HIGH	frameshift_variant	OTHER	TRUE	FALSE	11	4	15	11,4	1	Insertion	0.266667
G|missense_variant|MODERATE|efsc-1|WBGene00008133|transcript|C47B2.7b.1|protein_coding|8/8|c.1430A>G|p.Glu477Gly|1430/1534|1430/1503|477/500||,G|missense_variant|MODERATE|efsc-1|WBGene00008133|transcript|C47B2.7a.1|protein_coding|7/7|c.1307A>G|p.Glu436Gly|1307/1409|1307/1380|436/459||,G|upstream_gene_variant|MODIFIER|C47B2.9|WBGene00008134|transcript|C47B2.9.1|protein_coding||c.-677A>G|||||656|,G…	PRDE1	1	I	12982348	A	G	efsc-1	MODERATE	missense_variant	MISSENSE	FALSE	FALSE	7	3	10	7,3	1	SNP	0.3
GA|frameshift_variant|HIGH|F22G12.5|WBGene00009065|transcript|F22G12.5c.1|protein_coding|6/29|c.834dupA|p.Gly279fs|842/7315|835/7017|279/2338||INFO_REALIGN_3_PRIME,GA|frameshift_variant|HIGH|F22G12.5|WBGene00009065|transcript|F22G12.5a.1|protein_coding|6/29|c.834dupA|p.Gly279fs|835/7236|835/7011|279/2336||INFO_REALIGN_3_PRIME,GA|upstream_gene_variant|MODIFIER|F22G12.4|WBGene00009064|transcript|F2…	PRDE1	1	I	13165378	G	GA	F22G12.5	HIGH	frameshift_variant	OTHER	TRUE	FALSE	58	15	73	58,15	1	Insertion	0.205479
G|frameshift_variant|HIGH|ZK1053.4|WBGene00014199|transcript|ZK1053.4.1|protein_coding|5/7|c.1767delA|p.Val590fs|1791/2258|1767/2106|589/701||INFO_REALIGN_3_PRIME,G|upstream_gene_variant|MODIFIER|ZK1053.3|WBGene00014198|transcript|ZK1053.3.1|protein_coding||c.-2644delA|||||2644|,G|downstream_gene_variant|MODIFIER|ZK1053.6|WBGene00014201|transcript|ZK1053.6.1|protein_coding||c.*3483delA|||||3483|,…	PRDE1	1	I	13244208	GA	G	ZK1053.4	HIGH	frameshift_variant	OTHER	TRUE	FALSE	12	2	14	12,2	1	Deletion	0.142857
C|missense_variant|MODERATE|ZK1053.4|WBGene00014199|transcript|ZK1053.4.1|protein_coding|5/7|c.1765A>C|p.Lys589Gln|1789/2258|1765/2106|589/701||,C|upstream_gene_variant|MODIFIER|ZK1053.3|WBGene00014198|transcript|ZK1053.3.1|protein_coding||c.-2642A>C|||||2642|,C|downstream_gene_variant|MODIFIER|ZK1053.6|WBGene00014201|transcript|ZK1053.6.1|protein_coding||c.*3485A>C|||||3485|,C|downstream_gene_va…	PRDE1	1	I	13244211	A	C	ZK1053.4	MODERATE	missense_variant	MISSENSE	FALSE	FALSE	12	2	14	12,2	1	SNP	0.142857
CA|frameshift_variant|HIGH|top-1|WBGene00006595|transcript|M01E5.5a.1|protein_coding|1/5|c.84dupA|p.Glu29fs|197/3221|85/2421|29/806||INFO_REALIGN_3_PRIME,CA|frameshift_variant|HIGH|top-1|WBGene00006595|transcript|M01E5.5a.2|protein_coding|1/5|c.84dupA|p.Glu29fs|205/3229|85/2421|29/806||INFO_REALIGN_3_PRIME,CA|frameshift_variant|HIGH|top-1|WBGene00006595|transcript|M01E5.5b.2|protein_coding|1/4|c.…	PRDE1	1	I	13292703	C	CA	top-1	HIGH	frameshift_variant	OTHER	FALSE	FALSE	300	43	343	300,43	1	Insertion	0.125364
CA|frameshift_variant|HIGH|top-1|WBGene00006595|transcript|M01E5.5a.1|protein_coding|3/5|c.684dupA|p.Glu229fs|797/3221|685/2421|229/806||INFO_REALIGN_3_PRIME,CA|frameshift_variant|HIGH|top-1|WBGene00006595|transcript|M01E5.5a.2|protein_coding|3/5|c.684dupA|p.Glu229fs|805/3229|685/2421|229/806||INFO_REALIGN_3_PRIME,CA|frameshift_variant|HIGH|top-1|WBGene00006595|transcript|M01E5.5b.2|protein_codin…	PRDE1	1	I	13294297	C	CA	top-1	HIGH	frameshift_variant	OTHER	TRUE	FALSE	114	14	128	114,14	1	Insertion	0.109375
TA|frameshift_variant|HIGH|spr-5|WBGene00005010|transcript|Y40B1B.6.1|protein_coding|6/8|c.1515dupA|p.Val506fs|1526/2609|1516/2313|506/770||INFO_REALIGN_3_PRIME,TA|frameshift_variant|HIGH|spr-5|WBGene00005010|transcript|Y40B1B.6.2|protein_coding|6/8|c.1515dupA|p.Val506fs|1518/2582|1516/2313|506/770||INFO_REALIGN_3_PRIME	PRDE1	1	I	13445149	T	TA	spr-5	HIGH	frameshift_variant	OTHER	TRUE	FALSE	25	7	32	25,7	1	Insertion	0.21875
CA|frameshift_variant|HIGH|agef-1|WBGene00012386|transcript|Y6B3A.1a.1|protein_coding|8/19|c.1754dupT|p.Leu585fs|1781/5164|1754/4785|585/1594||,CA|downstream_gene_variant|MODIFIER|agef-1|WBGene00012386|transcript|Y6B3A.1b.1|protein_coding||c.*733dupT|||||733|	PRDE1	1	I	13619677	C	CA	agef-1	HIGH	frameshift_variant	OTHER	TRUE	FALSE	9	3	12	9,3	1	Insertion	0.25
GT|frameshift_variant|HIGH|W09C5.7|WBGene00012353|transcript|W09C5.7a.1|protein_coding|2/6|c.553dupT|p.Trp185fs|730/2556|554/2352|185/783||INFO_REALIGN_3_PRIME,GT|upstream_gene_variant|MODIFIER|rpl-31|WBGene00004445|transcript|W09C5.6a.1|protein_coding||c.-1096dupA|||||1077|,GT|upstream_gene_variant|MODIFIER|W09C5.9|WBGene00012355|transcript|W09C5.9|pseudogene||n.-4651_-4650insT|||||4650|,GT|upst…	PRDE1	1	I	13654780	G	GT	W09C5.7	HIGH	frameshift_variant	OTHER	TRUE	FALSE	24	5	29	24,5	1	Insertion	0.172414
C|synonymous_variant|LOW|W09C5.7|WBGene00012353|transcript|W09C5.7a.1|protein_coding|3/6|c.921G>C|p.Val307Val|1097/2556|921/2352|307/783||,C|upstream_gene_variant|MODIFIER|rpl-31|WBGene00004445|transcript|W09C5.6a.1|protein_coding||c.-1526C>G|||||1507|,C|upstream_gene_variant|MODIFIER|W09C5.9|WBGene00012355|transcript|W09C5.9|pseudogene||n.-4220G>C|||||4220|,C|upstream_gene_variant|MODIFIER|rpl-3…	PRDE1	1	I	13655211	G	C	W09C5.7	LOW	synonymous_variant	SILENT	FALSE	FALSE	11	2	13	11,2	1	SNP	0.153846
C|missense_variant|MODERATE|W09C5.7|WBGene00012353|transcript|W09C5.7a.1|protein_coding|3/6|c.923T>C|p.Phe308Ser|1099/2556|923/2352|308/783||,C|upstream_gene_variant|MODIFIER|rpl-31|WBGene00004445|transcript|W09C5.6a.1|protein_coding||c.-1528A>G|||||1509|,C|upstream_gene_variant|MODIFIER|W09C5.9|WBGene00012355|transcript|W09C5.9|pseudogene||n.-4218T>C|||||4218|,C|upstream_gene_variant|MODIFIER|rp…	PRDE1	1	I	13655213	T	C	W09C5.7	MODERATE	missense_variant	MISSENSE	FALSE	FALSE	11	2	13	11,2	1	SNP	0.153846
TA|frameshift_variant|HIGH|W04A4.5|WBGene00012234|transcript|W04A4.5.1|protein_coding|3/8|c.513dupA|p.Pro172fs|589/3404|514/3216|172/1071||INFO_REALIGN_3_PRIME,TA|upstream_gene_variant|MODIFIER|W09C5.12|WBGene00194660|transcript|W09C5.12.1|protein_coding||c.-1857dupT|||||1827|,TA|downstream_gene_variant|MODIFIER|W09C5.9|WBGene00012355|transcript|W09C5.9|pseudogene||n.*2393_*2394insA|||||2394|	PRDE1	1	I	13664158	T	TA	W04A4.5	HIGH	frameshift_variant	OTHER	TRUE	FALSE	27	5	32	27,5	1	Insertion	0.15625
CT|frameshift_variant|HIGH|gpap-1|WBGene00012390|transcript|Y6B3B.5b.1|protein_coding|7/9|c.705dupA|p.Val236fs|724/1141|705/1047|235/348||,CT|frameshift_variant|HIGH|gpap-1|WBGene00012390|transcript|Y6B3B.5a.1|protein_coding|7/9|c.678dupA|p.Val227fs|766/1210|678/1020|226/339||,CT|upstream_gene_variant|MODIFIER|Y6B3B.9|WBGene00012393|transcript|Y6B3B.9a.1|protein_coding||c.-2557dupA|||||2557|,CT|u…	PRDE1	1	I	13753680	C	CT	gpap-1	HIGH	frameshift_variant	OTHER	TRUE	FALSE	8	3	11	8,3	1	Insertion	0.272727
CT|frameshift_variant|HIGH|Y6B3B.4|WBGene00012389|transcript|Y6B3B.4.1|protein_coding|10/14|c.2274dupT|p.Gly759fs|2282/3631|2275/3624|759/1207||INFO_REALIGN_3_PRIME	PRDE1	1	I	13766834	C	CT	Y6B3B.4	HIGH	frameshift_variant	OTHER	TRUE	FALSE	35	7	42	35,7	1	Insertion	0.166667
CT|frameshift_variant|HIGH|W09G3.6|WBGene00012369|transcript|W09G3.6a.1|protein_coding|6/10|c.1287dupA|p.Glu430fs|1294/3625|1287/3378|429/1125||,CT|upstream_gene_variant|MODIFIER|W09G3.14|WBGene00199061|transcript|W09G3.14|lincRNA||n.-1929dupA|||||1929|,CT|upstream_gene_variant|MODIFIER|W09G3.13|WBGene00197271|transcript|W09G3.13|lincRNA||n.-996dupA|||||996|,CT|downstream_gene_variant|MODIFIER|21…	PRDE1	1	I	13821487	C	CT	W09G3.6	HIGH	frameshift_variant	OTHER	TRUE	FALSE	30	11	41	30,11	1	Insertion	0.268293
TA|frameshift_variant|HIGH|W04A8.6|WBGene00012241|transcript|W04A8.6a.1|protein_coding|4/7|c.422dupA|p.Glu142fs|440/1695|423/1530|141/509||INFO_REALIGN_3_PRIME,TA|5_prime_UTR_variant|MODIFIER|W04A8.6|WBGene00012241|transcript|W04A8.6b.1|protein_coding|4/8|c.-185dupA|||||1388|INFO_REALIGN_3_PRIME,TA|upstream_gene_variant|MODIFIER|W04A8.5|WBGene00012240|transcript|W04A8.5.1|protein_coding||c.-4395d…	PRDE1	1	I	13855207	T	TA	W04A8.6	HIGH	frameshift_variant	OTHER	TRUE	FALSE	75	17	92	75,17	1	Insertion	0.184783
GT|frameshift_variant|HIGH|usp-3|WBGene00013506|transcript|Y71A12B.9.1|protein_coding|3/8|c.522dupA|p.Arg175fs|522/1924|522/1653|174/550||,GT|upstream_gene_variant|MODIFIER|Y71A12B.31|WBGene00201688|transcript|Y71A12B.31|lincRNA||n.-2058_-2057insT|||||2057|,GT|upstream_gene_variant|MODIFIER|rps-6|WBGene00004475|transcript|Y71A12B.1a.1|protein_coding||c.-2465_-2464insT|||||2447|,GT|upstream_gene_v…	PRDE1	1	I	13949713	G	GT	usp-3	HIGH	frameshift_variant	OTHER	TRUE	FALSE	7	3	10	7,3	1	Insertion	0.3
CA|frameshift_variant|HIGH|smd-1|WBGene00004875|transcript|F47G4.7.1|protein_coding|3/6|c.468dupT|p.Val157fs|922/2014|468/1107|156/368||,CA|upstream_gene_variant|MODIFIER|Y71A12C.3|WBGene00050878|transcript|Y71A12C.3|pseudogene||n.-4122dupT|||||4122|,CA|upstream_gene_variant|MODIFIER|Y71A12C.2|WBGene00013513|transcript|Y71A12C.2.1|protein_coding||c.-1799dupT|||||1799|,CA|downstream_gene_variant|M…	PRDE1	1	I	14049815	C	CA	smd-1	HIGH	frameshift_variant	OTHER	TRUE	FALSE	24	8	32	24,8	1	Insertion	0.25
C|missense_variant|MODERATE|gpdh-1|WBGene00009824|transcript|F47G4.3.1|protein_coding|2/4|c.616G>C|p.Val206Leu|657/1309|616/1125|206/374||,C|upstream_gene_variant|MODIFIER|F47G4.12|WBGene00197618|transcript|F47G4.12|lincRNA||n.-1387C>G|||||1387|,C|downstream_gene_variant|MODIFIER|F47G4.11|WBGene00197035|transcript|F47G4.11|lincRNA||n.*1387G>C|||||1387|,C|downstream_gene_variant|MODIFIER|gadr-6|WB…	PRDE1	1	I	14076550	G	C	gpdh-1	MODERATE	missense_variant	MISSENSE	FALSE	FALSE	13	3	16	13,3	1	SNP	0.1875
CA|frameshift_variant|HIGH|Y63D3A.7|WBGene00013406|transcript|Y63D3A.7.1|protein_coding|1/3|c.120dupA|p.Ala41fs|121/361|121/279|41/92||INFO_REALIGN_3_PRIME,CA|upstream_gene_variant|MODIFIER|dnj-29|WBGene00001047|transcript|Y63D3A.6b.1|protein_coding||c.-659dupT|||||642|,CA|upstream_gene_variant|MODIFIER|Y63D3A.8|WBGene00013407|transcript|Y63D3A.8.1|protein_coding||c.-458_-457insA|||||444|,CA|upst…	PRDE1	1	I	14113749	C	CA	Y63D3A.7	HIGH	frameshift_variant	OTHER	TRUE	FALSE	27	6	33	27,6	1	Insertion	0.181818
CA|frameshift_variant|HIGH|C37A5.7|WBGene00007991|transcript|C37A5.7.1|protein_coding|3/9|c.403dupA|p.Ile135fs|432/1460|404/1182|135/393||INFO_REALIGN_3_PRIME,CA|frameshift_variant|HIGH|C37A5.7|WBGene00007991|transcript|C37A5.7.2|protein_coding|3/9|c.403dupA|p.Ile135fs|515/1543|404/1182|135/393||INFO_REALIGN_3_PRIME,CA|upstream_gene_variant|MODIFIER|best-8|WBGene00007988|transcript|C37A5.1.1|prot…	PRDE1	1	I	14164623	C	CA	C37A5.7	HIGH	frameshift_variant	OTHER	TRUE	FALSE	10	3	13	10,3	1	Insertion	0.230769
CT|frameshift_variant|HIGH|Y105E8A.2|WBGene00013667|transcript|Y105E8A.2.1|protein_coding|2/5|c.729dupA|p.Asp244fs|747/1849|729/1608|243/535||,CT|upstream_gene_variant|MODIFIER|Y105E8A.3|WBGene00013668|transcript|Y105E8A.3.1|protein_coding||c.-3413_-3412insT|||||3252|	PRDE1	1	I	14355249	C	CT	Y105E8A.2	HIGH	frameshift_variant	OTHER	TRUE	FALSE	35	5	40	35,5	1	Insertion	0.125
T|frameshift_variant|HIGH|Y105E8A.3|WBGene00013668|transcript|Y105E8A.3.1|protein_coding|4/9|c.609delG|p.Leu204fs|769/2590|609/2241|203/746||,T|upstream_gene_variant|MODIFIER|Y105E8A.2|WBGene00013667|transcript|Y105E8A.2.1|protein_coding||c.-1696delC|||||1678|	PRDE1	1	I	14360003	TG	T	Y105E8A.3	HIGH	frameshift_variant	OTHER	TRUE	FALSE	8	2	10	8,2	1	Deletion	0.2
CT|frameshift_variant|HIGH|tcab-1|WBGene00013669|transcript|Y105E8A.8.1|protein_coding|2/7|c.261dupA|p.Ala88fs|261/1564|261/1350|87/449||,CT|upstream_gene_variant|MODIFIER|apg-1|WBGene00000158|transcript|Y105E8A.9.1|protein_coding||c.-703_-702insT|||||687|	PRDE1	1	I	14405340	C	CT	tcab-1	HIGH	frameshift_variant	OTHER	TRUE	FALSE	9	5	14	9,5	1	Insertion	0.357143
GT|frameshift_variant|HIGH|tcab-1|WBGene00013669|transcript|Y105E8A.8.1|protein_coding|1/7|c.48dupA|p.Pro17fs|48/1564|48/1350|16/449||,GT|upstream_gene_variant|MODIFIER|apg-1|WBGene00000158|transcript|Y105E8A.9.1|protein_coding||c.-442_-441insT|||||426|	PRDE1	1	I	14405601	G	GT	tcab-1	HIGH	frameshift_variant	OTHER	FALSE	FALSE	8	3	11	8,3	1	Insertion	0.272727
TA|frameshift_variant|HIGH|hpo-13|WBGene00013670|transcript|Y105E8A.10a.1|protein_coding|9/9|c.2681dupA|p.His895fs|2682/3003|2682/2880|894/959||INFO_REALIGN_3_PRIME,TA|frameshift_variant|HIGH|hpo-13|WBGene00013670|transcript|Y105E8A.10c.1|protein_coding|9/9|c.2570dupA|p.His858fs|2638/2959|2571/2769|857/922||INFO_REALIGN_3_PRIME,TA|frameshift_variant|HIGH|hpo-13|WBGene00013670|transcript|Y105E8A.1…	PRDE1	1	I	14431478	T	TA	hpo-13	HIGH	frameshift_variant	OTHER	TRUE	FALSE	9	2	11	9,2	1	Insertion	0.181818
C|5_prime_UTR_premature_start_codon_gain_variant|LOW|rps-20|WBGene00004489|transcript|Y105E8A.16.1|protein_coding|1/4|c.-89C>G||||||,C|5_prime_UTR_variant|MODIFIER|rps-20|WBGene00004489|transcript|Y105E8A.16.1|protein_coding|1/4|c.-89C>G|||||89|,C|upstream_gene_variant|MODIFIER|Y105E8A.13|WBGene00013673|transcript|Y105E8A.13a.1|protein_coding||c.-3967C>G|||||3961|,C|upstream_gene_variant|MODIFIER…	PRDE1	1	I	14469106	G	C	rps-20	LOW	5_prime_UTR_premature_start_codon_gain_variant	OTHER	FALSE	FALSE	3	15	18	3,15	1	SNP	0.833333
AT|frameshift_variant|HIGH|Y105E8A.21|WBGene00013679|transcript|Y105E8A.21a.1|protein_coding|2/7|c.336dupA|p.Cys113fs|349/2912|336/2805|112/934||,AT|downstream_gene_variant|MODIFIER|exc-4|WBGene00001365|transcript|Y105E8A.22.1|protein_coding||c.*4057dupA|||||2825|	PRDE1	1	I	14508605	A	AT	Y105E8A.21	HIGH	frameshift_variant	OTHER	TRUE	FALSE	7	3	10	7,3	1	Insertion	0.3
CT|frameshift_variant|HIGH|exc-4|WBGene00001365|transcript|Y105E8A.22.1|protein_coding|2/4|c.431dupA|p.Glu145fs|435/2109|431/873|144/290||	PRDE1	1	I	14516567	C	CT	exc-4	HIGH	frameshift_variant	OTHER	TRUE	FALSE	29	6	35	29,6	1	Insertion	0.171429
CT|frameshift_variant|HIGH|Y105E8A.25|WBGene00013682|transcript|Y105E8A.25b.1|protein_coding|22/24|c.4629dupA|p.Glu1544fs|4629/5188|4629/4860|1543/1619||,CT|frameshift_variant|HIGH|Y105E8A.25|WBGene00013682|transcript|Y105E8A.25d.3|protein_coding|11/12|c.2340dupA|p.Glu781fs|2550/3085|2340/2676|780/891||,CT|frameshift_variant|HIGH|Y105E8A.25|WBGene00013682|transcript|Y105E8A.25e.3|protein_coding|1…	PRDE1	1	I	14570258	C	CT	Y105E8A.25	HIGH	frameshift_variant	OTHER	TRUE	FALSE	45	9	54	45,9	1	Insertion	0.166667
CA|frameshift_variant|HIGH|npp-4|WBGene00003790|transcript|Y54E5A.4.1|protein_coding|4/5|c.1088dupT|p.Leu363fs|1090/1807|1088/1617|363/538||,CA|downstream_gene_variant|MODIFIER|Y54E5A.2|WBGene00013198|transcript|Y54E5A.2.1|protein_coding||c.*3016_*3017insA|||||2925|,CA|downstream_gene_variant|MODIFIER|Y54E5A.5|WBGene00013200|transcript|Y54E5A.5.1|protein_coding||c.*3849dupT|||||3742|,CA|downstrea…	PRDE1	1	I	14703316	C	CA	npp-4	HIGH	frameshift_variant	OTHER	TRUE	FALSE	36	6	42	36,6	1	Insertion	0.142857
CA|frameshift_variant|HIGH|K05C4.5|WBGene00010582|transcript|K05C4.5.1|protein_coding|3/6|c.1106dupA|p.Arg370fs|1107/2181|1107/2061|369/686||INFO_REALIGN_3_PRIME,CA|downstream_gene_variant|MODIFIER|hmp-2|WBGene00001979|transcript|K05C4.6b.1|protein_coding||c.*2542_*2543insA|||||2408|,CA|downstream_gene_variant|MODIFIER|K05C4.3|WBGene00010580|transcript|K05C4.3.1|protein_coding||c.*3473dupT|||||34…	PRDE1	1	I	14745064	C	CA	K05C4.5	HIGH	frameshift_variant	OTHER	TRUE	FALSE	43	7	50	43,7	1	Insertion	0.14
G|5_prime_UTR_premature_start_codon_gain_variant|LOW|rps-26|WBGene00004495|transcript|F39B2.6.3|protein_coding|1/2|c.-9C>G||||||,G|5_prime_UTR_variant|MODIFIER|rps-26|WBGene00004495|transcript|F39B2.6.3|protein_coding|1/2|c.-9C>G|||||9|,G|upstream_gene_variant|MODIFIER|mtx-1|WBGene00009559|transcript|F39B2.11.1|protein_coding||c.-3551G>C|||||3495|,G|upstream_gene_variant|MODIFIER|tmem-107|WBGene0…	PRDE1	1	I	14759927	C	G	rps-26	LOW	5_prime_UTR_premature_start_codon_gain_variant	OTHER	FALSE	FALSE	6	37	43	6,37	1	SNP	0.860465
C|missense_variant|MODERATE|F39B2.8|WBGene00009558|transcript|F39B2.8.1|protein_coding|8/9|c.1418A>G|p.Lys473Arg|1472/1916|1418/1785|473/594||,C|upstream_gene_variant|MODIFIER|mtx-1|WBGene00009559|transcript|F39B2.11.1|protein_coding||c.-4765A>G|||||4709|,C|upstream_gene_variant|MODIFIER|tmem-107|WBGene00043308|transcript|F39B2.9.1|protein_coding||c.-1894A>G|||||1880|,C|upstream_gene_variant|MODI…	PRDE1	1	I	14761141	T	C	F39B2.8	MODERATE	missense_variant	MISSENSE	FALSE	FALSE	9	2	11	9,2	1	SNP	0.181818
A|stop_gained|HIGH|F39B2.8|WBGene00009558|transcript|F39B2.8.1|protein_coding|8/9|c.1417A>T|p.Lys473*|1471/1916|1417/1785|473/594||,A|upstream_gene_variant|MODIFIER|mtx-1|WBGene00009559|transcript|F39B2.11.1|protein_coding||c.-4766A>T|||||4710|,A|upstream_gene_variant|MODIFIER|tmem-107|WBGene00043308|transcript|F39B2.9.1|protein_coding||c.-1895A>T|||||1881|,A|upstream_gene_variant|MODIFIER|F39B2.…	PRDE1	1	I	14761142	T	A	F39B2.8	HIGH	stop_gained	NONSENSE	TRUE	TRUE	9	2	11	9,2	1	SNP	0.181818
GA|frameshift_variant|HIGH|sur-2|WBGene00006349|transcript|F39B2.4b.1|protein_coding|2/17|c.138dupT|p.Arg47fs|146/4916|138/4770|46/1589||,GA|frameshift_variant|HIGH|sur-2|WBGene00006349|transcript|F39B2.4a.1|protein_coding|2/17|c.138dupT|p.Arg47fs|146/4910|138/4764|46/1587||,GA|upstream_gene_variant|MODIFIER|uev-1|WBGene00006730|transcript|F39B2.2.1|protein_coding||c.-2678_-2677insA|||||2650|,GA|…	PRDE1	1	I	14787593	G	GA	sur-2	HIGH	frameshift_variant	OTHER	FALSE	FALSE	11	3	14	11,3	1	Insertion	0.214286
GA|frameshift_variant|HIGH|F32A7.4|WBGene00009305|transcript|F32A7.4.1|protein_coding|3/7|c.377dupA|p.Asp127fs|454/1789|378/1590|126/529||INFO_REALIGN_3_PRIME,GA|downstream_gene_variant|MODIFIER|F32A7.8|WBGene00044245|transcript|F32A7.8.1|protein_coding||c.*1268_*1269insA|||||1269|	PRDE1	1	I	14840406	G	GA	F32A7.4	HIGH	frameshift_variant	OTHER	TRUE	FALSE	72	11	83	72,11	1	Insertion	0.13253
CT|frameshift_variant|HIGH|frm-1|WBGene00001488|transcript|ZK270.2d.1|protein_coding|7/14|c.2379dupA|p.Gly794fs|2384/14564|2379/13947|793/4648||,CT|frameshift_variant|HIGH|frm-1|WBGene00001488|transcript|ZK270.2a.1|protein_coding|7/12|c.2379dupA|p.Gly794fs|2384/14210|2379/13593|793/4530||,CT|frameshift_variant|HIGH|frm-1|WBGene00001488|transcript|ZK270.2e.1|protein_coding|8/13|c.2412dupA|p.Gly805…	PRDE1	1	I	14892524	C	CT	frm-1	HIGH	frameshift_variant	OTHER	TRUE	FALSE	24	5	29	24,5	1	Insertion	0.172414
G|synonymous_variant|LOW|ZK909.6|WBGene00014150|transcript|ZK909.6.1|protein_coding|2/4|c.162A>G|p.Gln54Gln|174/457|162/375|54/124||,G|downstream_gene_variant|MODIFIER|ces-2|WBGene00000469|transcript|ZK909.4.1|protein_coding||c.*2651A>G|||||2311|	PRDE1	1	I	14967672	A	G	ZK909.6	LOW	synonymous_variant	SILENT	FALSE	FALSE	10	2	12	10,2	1	SNP	0.166667
C|missense_variant|MODERATE|ZK909.6|WBGene00014150|transcript|ZK909.6.1|protein_coding|2/4|c.164T>C|p.Val55Ala|176/457|164/375|55/124||,C|downstream_gene_variant|MODIFIER|ces-2|WBGene00000469|transcript|ZK909.4.1|protein_coding||c.*2653T>C|||||2313|	PRDE1	1	I	14967674	T	C	ZK909.6	MODERATE	missense_variant	MISSENSE	FALSE	FALSE	10	2	12	10,2	1	SNP	0.166667
GA|frameshift_variant|HIGH|C01B12.8|WBGene00015291|transcript|C01B12.8.1|protein_coding|1/4|c.53dupA|p.Arg19fs|159/632|54/462|18/153||INFO_REALIGN_3_PRIME,GA|upstream_gene_variant|MODIFIER|C01B12.10|WBGene00200963|transcript|C01B12.10|lincRNA||n.-1583dupT|||||1583|,GA|downstream_gene_variant|MODIFIER|gmeb-1|WBGene00015285|transcript|C01B12.2.1|protein_coding||c.*2974_*2975insA|||||2648|,GA|downst…	PRDE1	1	II	24816	G	GA	C01B12.8	HIGH	frameshift_variant	OTHER	TRUE	FALSE	26	4	30	26,4	1	Insertion	0.133333
GA|frameshift_variant|HIGH|C01B12.8|WBGene00015291|transcript|C01B12.8.1|protein_coding|4/4|c.328dupA|p.Arg110fs|434/632|329/462|110/153||INFO_REALIGN_3_PRIME,GA|upstream_gene_variant|MODIFIER|C01B12.10|WBGene00200963|transcript|C01B12.10|lincRNA||n.-2007dupT|||||2007|,GA|downstream_gene_variant|MODIFIER|gmeb-1|WBGene00015285|transcript|C01B12.2.1|protein_coding||c.*3398_*3399insA|||||3072|,GA|do…	PRDE1	1	II	25240	G	GA	C01B12.8	HIGH	frameshift_variant	OTHER	TRUE	FALSE	56	12	68	56,12	1	Insertion	0.176471
CT|frameshift_variant|HIGH|rpt-4|WBGene00004504|transcript|F23F1.8a.1|protein_coding|2/4|c.147dupA|p.Glu50fs|231/1461|147/1221|49/406||,CT|frameshift_variant|HIGH|rpt-4|WBGene00004504|transcript|F23F1.8b.1|protein_coding|1/3|c.123dupA|p.Glu42fs|126/1382|123/1197|41/398||,CT|upstream_gene_variant|MODIFIER|F23F1.7|WBGene00017748|transcript|F23F1.7.1|protein_coding||c.-4050dupA|||||4000|,CT|upstream…	PRDE1	1	II	43536	C	CT	rpt-4	HIGH	frameshift_variant	OTHER	TRUE	FALSE	169	21	190	169,21	1	Insertion	0.110526
GT|frameshift_variant|HIGH|trul-1|WBGene00015194|transcript|B0432.13.1|protein_coding|3/8|c.578dupA|p.Asn193fs|593/1491|578/1356|193/451||,GT|frameshift_variant|HIGH|trul-1|WBGene00015194|transcript|B0432.13.2|protein_coding|3/7|c.578dupA|p.Asn193fs|593/1429|578/1356|193/451||,GT|upstream_gene_variant|MODIFIER|B0432.8|WBGene00015189|transcript|B0432.8.1|protein_coding||c.-2628dupA|||||2624|,GT|up…	PRDE1	1	II	281359	G	GT	trul-1	HIGH	frameshift_variant	OTHER	TRUE	FALSE	20	4	24	20,4	1	Insertion	0.166667
GA|frameshift_variant|HIGH|misc-1|WBGene00015186|transcript|B0432.4.1|protein_coding|2/5|c.137dupA|p.Glu47fs|146/1159|138/921|46/306||INFO_REALIGN_3_PRIME,GA|frameshift_variant|HIGH|misc-1|WBGene00015186|transcript|B0432.4.2|protein_coding|2/6|c.137dupA|p.Glu47fs|146/1078|138/921|46/306||INFO_REALIGN_3_PRIME,GA|upstream_gene_variant|MODIFIER|trul-1|WBGene00015194|transcript|B0432.13.1|protein_cod…	PRDE1	1	II	286839	G	GA	misc-1	HIGH	frameshift_variant	OTHER	TRUE	FALSE	47	7	54	47,7	1	Insertion	0.12963
CT|frameshift_variant|HIGH|D1069.3|WBGene00017037|transcript|D1069.3b.1|protein_coding|8/10|c.1164dupA|p.Val389fs|1281/1802|1164/1530|388/509||,CT|frameshift_variant|HIGH|D1069.3|WBGene00017037|transcript|D1069.3c.1|protein_coding|8/10|c.216dupA|p.Val73fs|1260/1781|216/582|72/193||,CT|frameshift_variant|HIGH|D1069.3|WBGene00017037|transcript|D1069.3c.2|protein_coding|2/4|c.216dupA|p.Val73fs|260/7…	PRDE1	1	II	343884	C	CT	D1069.3	HIGH	frameshift_variant	OTHER	TRUE	FALSE	19	4	23	19,4	1	Insertion	0.173913
GA|frameshift_variant|HIGH|thoc-1|WBGene00020172|transcript|T02H6.2.1|protein_coding|14/15|c.1629dupA|p.Val544fs|1638/2006|1630/1998|544/665||INFO_REALIGN_3_PRIME,GA|upstream_gene_variant|MODIFIER|T02H6.1|WBGene00020171|transcript|T02H6.1a.1|protein_coding||c.-2904_-2903insA|||||2895|,GA|upstream_gene_variant|MODIFIER|T02H6.1|WBGene00020171|transcript|T02H6.1b.1|protein_coding||c.-2904_-2903insA|…	PRDE1	1	II	706485	G	GA	thoc-1	HIGH	frameshift_variant	OTHER	TRUE	FALSE	18	6	24	18,6	1	Insertion	0.25
CTT|frameshift_variant|HIGH|pho-14|WBGene00020471|transcript|T13B5.3.1|protein_coding|5/10|c.677_678dupAA|p.Val227fs|685/1370|678/1323|226/440||,CTT|downstream_gene_variant|MODIFIER|snf-3|WBGene00004902|transcript|T13B5.1.1|protein_coding||c.*2093_*2094insTT|||||1746|,CTT|downstream_gene_variant|MODIFIER|T13B5.9|WBGene00020476|transcript|T13B5.9.1|protein_coding||c.*1799_*1800dupAA|||||1726|,CTT|…	PRDE1	1	II	1099644	C	CTT	pho-14	HIGH	frameshift_variant	OTHER	TRUE	FALSE	10	2	12	10,2	1	Insertion	0.166667
CA|frameshift_variant|HIGH|eri-3|WBGene00021103|transcript|W09B6.3a.1|protein_coding|8/11|c.1262dupA|p.Tyr422fs|1265/1794|1263/1737|421/578||INFO_REALIGN_3_PRIME,CA|frameshift_variant|HIGH|eri-3|WBGene00021103|transcript|W09B6.3b.1|protein_coding|8/11|c.704dupA|p.Tyr236fs|1167/1692|705/1179|235/392||INFO_REALIGN_3_PRIME,CA|frameshift_variant|HIGH|eri-3|WBGene00021103|transcript|W09B6.3c.1|protein…	PRDE1	1	II	1126581	C	CA	eri-3	HIGH	frameshift_variant	OTHER	TRUE	FALSE	9	3	12	9,3	1	Insertion	0.25
A|missense_variant|MODERATE|taf-6.1|WBGene00006387|transcript|W09B6.2a.1|protein_coding|2/8|c.247G>A|p.Ala83Thr|263/1478|247/1413|83/470||,A|missense_variant|MODERATE|taf-6.1|WBGene00006387|transcript|W09B6.2b.1|protein_coding|1/7|c.25G>A|p.Ala9Thr|102/1312|25/1191|9/396||,A|5_prime_UTR_variant|MODIFIER|taf-6.1|WBGene00006387|transcript|W09B6.2c.1|protein_coding|1/7|c.-349G>A|||||1342|,A|upstream…	PRDE1	1	II	1128754	G	A	taf-6.1	MODERATE	missense_variant	MISSENSE	FALSE	FALSE	9	2	11	9,2	1	SNP	0.181818
T|missense_variant|MODERATE|taf-6.1|WBGene00006387|transcript|W09B6.2a.1|protein_coding|2/8|c.248C>T|p.Ala83Val|264/1478|248/1413|83/470||,T|missense_variant|MODERATE|taf-6.1|WBGene00006387|transcript|W09B6.2b.1|protein_coding|1/7|c.26C>T|p.Ala9Val|103/1312|26/1191|9/396||,T|5_prime_UTR_variant|MODIFIER|taf-6.1|WBGene00006387|transcript|W09B6.2c.1|protein_coding|1/7|c.-348C>T|||||1341|,T|upstream…	PRDE1	1	II	1128755	C	T	taf-6.1	MODERATE	missense_variant	MISSENSE	FALSE	FALSE	9	2	11	9,2	1	SNP	0.181818
AT|frameshift_variant|HIGH|W09B6.4|WBGene00021104|transcript|W09B6.4c.1|protein_coding|6/6|c.685dupA|p.Ile229fs|685/837|685/771|229/256||,AT|frameshift_variant|HIGH|W09B6.4|WBGene00021104|transcript|W09B6.4a.1|protein_coding|6/6|c.679dupA|p.Ile227fs|776/928|679/765|227/254||,AT|frameshift_variant|HIGH|W09B6.4|WBGene00021104|transcript|W09B6.4b.1|protein_coding|6/6|c.193dupA|p.Ile65fs|526/619|193/…	PRDE1	1	II	1132453	A	AT	W09B6.4	HIGH	frameshift_variant	OTHER	TRUE	FALSE	55	7	62	55,7	1	Insertion	0.112903
CA|frameshift_variant|HIGH|fcho-1|WBGene00018974|transcript|F56D12.6a.1|protein_coding|7/14|c.1095dupA|p.Ser366fs|1158/3152|1096/2907|366/968||INFO_REALIGN_3_PRIME,CA|frameshift_variant|HIGH|fcho-1|WBGene00018974|transcript|F56D12.6b.1|protein_coding|6/13|c.1044dupA|p.Ser349fs|1095/3088|1045/2856|349/951||INFO_REALIGN_3_PRIME,CA|upstream_gene_variant|MODIFIER|21ur-13751|WBGene00172169|transcript|…	PRDE1	1	II	1316148	C	CA	fcho-1	HIGH	frameshift_variant	OTHER	TRUE	FALSE	48	7	55	48,7	1	Insertion	0.127273
GA|frameshift_variant|HIGH|fcho-1|WBGene00018974|transcript|F56D12.6a.1|protein_coding|7/14|c.1122dupA|p.Gly375fs|1185/3152|1123/2907|375/968||INFO_REALIGN_3_PRIME,GA|frameshift_variant|HIGH|fcho-1|WBGene00018974|transcript|F56D12.6b.1|protein_coding|6/13|c.1071dupA|p.Gly358fs|1122/3088|1072/2856|358/951||INFO_REALIGN_3_PRIME,GA|upstream_gene_variant|MODIFIER|21ur-13751|WBGene00172169|transcript|…	PRDE1	1	II	1316175	G	GA	fcho-1	HIGH	frameshift_variant	OTHER	TRUE	FALSE	32	6	38	32,6	1	Insertion	0.157895
AT|frameshift_variant|HIGH|nol-6|WBGene00021789|transcript|Y51H7C.11.1|protein_coding|10/18|c.1686_1687insA|p.Ser563fs|1688/3303|1686/3177|562/1058||,AT|upstream_gene_variant|MODIFIER|Y51H7C.36|WBGene00201708|transcript|Y51H7C.36|lincRNA||n.-1418_-1417insA|||||1418|,AT|downstream_gene_variant|MODIFIER|Y51H7C.32|WBGene00200703|transcript|Y51H7C.32|lincRNA||n.*1417_*1418insT|||||1418|	PRDE1	1	II	1433153	A	AT	nol-6	HIGH	frameshift_variant	OTHER	TRUE	FALSE	13	2	15	13,2	1	Insertion	0.133333
G|synonymous_variant|LOW|nol-6|WBGene00021789|transcript|Y51H7C.11.1|protein_coding|10/18|c.1686G>C|p.Thr562Thr|1688/3303|1686/3177|562/1058||,G|upstream_gene_variant|MODIFIER|Y51H7C.36|WBGene00201708|transcript|Y51H7C.36|lincRNA||n.-1418G>C|||||1418|,G|downstream_gene_variant|MODIFIER|Y51H7C.32|WBGene00200703|transcript|Y51H7C.32|lincRNA||n.*1418C>G|||||1418|	PRDE1	1	II	1433154	C	G	nol-6	LOW	synonymous_variant	SILENT	FALSE	FALSE	13	2	15	13,2	1	SNP	0.133333
GA|frameshift_variant|HIGH|emc-1|WBGene00019209|transcript|H17B01.4a.1|protein_coding|9/16|c.1648dupT|p.Ser550fs|1652/3041|1648/2841|550/946||,GA|downstream_gene_variant|MODIFIER|emc-1|WBGene00019209|transcript|H17B01.4b.1|protein_coding||c.*2182dupT|||||2182|	PRDE1	1	II	1495648	G	GA	emc-1	HIGH	frameshift_variant	OTHER	TRUE	FALSE	43	7	50	43,7	1	Insertion	0.14
CT|frameshift_variant|HIGH|F07E5.5|WBGene00017210|transcript|F07E5.5.1|protein_coding|8/8|c.1128dupA|p.Ala377fs|1137/1255|1128/1155|376/384||,CT|upstream_gene_variant|MODIFIER|bath-14|WBGene00015016|transcript|B0047.5|pseudogene||n.-4862dupA|||||4862|,CT|upstream_gene_variant|MODIFIER|F07E5.4|WBGene00017209|transcript|F07E5.4.1|protein_coding||c.-2358dupA|||||2358|,CT|downstream_gene_variant|MODI…	PRDE1	1	II	2054036	C	CT	F07E5.5	HIGH	frameshift_variant	OTHER	FALSE	FALSE	11	3	14	11,3	1	Insertion	0.214286
A|start_lost|HIGH|cct-3|WBGene00018782|transcript|F54A3.3.1|protein_coding|1/8|c.3G>A|p.Met1?|12/2602|3/1632|1/543||,A|upstream_gene_variant|MODIFIER|F54A3.6|WBGene00018785|transcript|F54A3.6a.1|protein_coding||c.-1220C>T|||||1081|,A|upstream_gene_variant|MODIFIER|F54A3.11|WBGene00219965|transcript|F54A3.11|lincRNA||n.-4375C>T|||||4375|,A|upstream_gene_variant|MODIFIER|F54A3.6|WBGene00018785|tran…	PRDE1	1	II	2233551	G	A	cct-3	HIGH	start_lost	OTHER	TRUE	FALSE	10	2	12	10,2	1	SNP	0.166667
A|missense_variant|MODERATE|cct-3|WBGene00018782|transcript|F54A3.3.1|protein_coding|1/8|c.5G>A|p.Arg2His|14/2602|5/1632|2/543||,A|upstream_gene_variant|MODIFIER|F54A3.6|WBGene00018785|transcript|F54A3.6a.1|protein_coding||c.-1222C>T|||||1083|,A|upstream_gene_variant|MODIFIER|F54A3.11|WBGene00219965|transcript|F54A3.11|lincRNA||n.-4377C>T|||||4377|,A|upstream_gene_variant|MODIFIER|F54A3.6|WBGene0…	PRDE1	1	II	2233553	G	A	cct-3	MODERATE	missense_variant	MISSENSE	FALSE	FALSE	10	2	12	10,2	1	SNP	0.166667
CA|frameshift_variant|HIGH|cct-3|WBGene00018782|transcript|F54A3.3.1|protein_coding|3/8|c.355dupA|p.Thr119fs|365/2602|356/1632|119/543||INFO_REALIGN_3_PRIME,CA|upstream_gene_variant|MODIFIER|F54A3.6|WBGene00018785|transcript|F54A3.6a.1|protein_coding||c.-3272dupT|||||3133|,CA|upstream_gene_variant|MODIFIER|F54A3.6|WBGene00018785|transcript|F54A3.6b.1|protein_coding||c.-3272dupT|||||3133|	PRDE1	1	II	2235602	C	CA	cct-3	HIGH	frameshift_variant	OTHER	TRUE	FALSE	50	10	60	50,10	1	Insertion	0.166667
CA|frameshift_variant|HIGH|F54A3.2|WBGene00018781|transcript|F54A3.2.1|protein_coding|4/10|c.467dupA|p.Thr157fs|481/2623|468/2247|156/748||INFO_REALIGN_3_PRIME,CA|upstream_gene_variant|MODIFIER|F54A3.7|WBGene00195742|transcript|F54A3.7|lincRNA||n.-941_-940insA|||||940|,CA|downstream_gene_variant|MODIFIER|cct-3|WBGene00018782|transcript|F54A3.3.1|protein_coding||c.*4283_*4284insA|||||3323|	PRDE1	1	II	2246861	C	CA	F54A3.2	HIGH	frameshift_variant	OTHER	TRUE	FALSE	13	4	17	13,4	1	Insertion	0.235294
[truncated: 4,259 more rows]
